# Supplementary material for: α-amanitin resistance in Drosophila melanogaster: A genome-wide association approach
Source: PLoS One. 2017 Feb 27;12(2):e0173162. doi: 10.1371/journal.pone.0173162 (PMC5328632; doi:10.1371/journal.pone.0173162)
Supplement: S1 Table — All DGRP lines were tested on two α-amanitin concentrations (0.2 μg/g and 2.0 μg/g), using 30 larvae per concentration and fly line (three replicates of 10 larvae each). Twelve lines displayed relatively high, 83 intermediate, and 91 low resistance to α-amanitin. The values are also graphically represented in Fig 1A and 1C. (XLSX) [file pone.0173162.s001.xlsx]

## Sheet: S1
CONCENTRATION 0.2 ug/g	Hatching flies out of 10 first-instar larvae placed on toxic food											CONCENTRATION 2 ug/g	Hatching flies out of 10 first-instar larvae placed on toxic food										Resistance rating
DGRP strain number	Replicate 1	Replicate 2	Replicate 3	Total	Average		SD	n	square root of n	SEMnew	SEM	DGRP strain number	Replicate 1	Replicate 2	Replicate 3	Total	Average	SD	n	square root of n	SEMnew	SEM	H = high, M = medium, L = low
21	6	6	0	12	4		3.4641	3	1.73205	2	2.00006	21	0	1	2	3	1	1	3	1.73205	0.57735	0.577367	M
26	3	5	10	18	6		3.60555	3	1.73205	2.08167	2.08173	26	3	1	0	4	1.33333	1.52753	3	1.73205	0.881917	0.881943	M
28	8	7	0	15	5		4.3589	3	1.73205	2.51661	2.51669	28	0	0	0	0	0	0	3	1.73205	0	0	M
38	2	2	2	6	2		0	3	1.73205	0	0	38	1	0	0	1	0.333333	0.57735	3	1.73205	0.333333	0.333343	L
40	3	4	6	13	4.33333		1.52753	3	1.73205	0.881917	0.881943	40	1	2	0	3	1	1	3	1.73205	0.57735	0.577367	M
41	5	6	4	15	5		1	3	1.73205	0.57735	0.577367	41	2	1	1	4	1.33333	0.57735	3	1.73205	0.333333	0.333343	M
42	4	3	6	13	4.33333		1.52753	3	1.73205	0.881917	0.881943	42	2	2	0	4	1.33333	1.1547	3	1.73205	0.666667	0.666686	M
45	0	0	0	0	0		0	3	1.73205	0	0	45	0	0	0	0	0	0	3	1.73205	0	0	L
57	7	10	1	18	6		4.58258	3	1.73205	2.64575	2.64583	57	0	0	0	0	0	0	3	1.73205	0	0	M
59	1	2	1	4	1.33333		0.57735	3	1.73205	0.333333	0.333343	59	0	0	0	0	0	0	3	1.73205	0	0	L
69	6	5	0	11	3.66667		3.21455	3	1.73205	1.85592	1.85598	69	0	0	0	0	0	0	3	1.73205	0	0	L
73	0	8	1	9	3		4.3589	3	1.73205	2.51661	2.51669	73	0	0	0	0	0	0	3	1.73205	0	0	L
75	1	2	4	7	2.33333		1.52753	3	1.73205	0.881917	0.881943	75	0	0	0	0	0	0	3	1.73205	0	0	L
83	0	6	0	6	2		3.4641	3	1.73205	2	2.00006	83	0	0	0	0	0	0	3	1.73205	0	0	L
85	0	0	0	0	0		0	3	1.73205	0	0	85	2	6	8	16	5.33333	3.05505	3	1.73205	1.76383	1.76389	H
88	3	0	0	3	1		1.73205	3	1.73205	1	1.00003	88	0	0	0	0	0	0	3	1.73205	0	0	L
91	0	1	8	9	3		4.3589	3	1.73205	2.51661	2.51669	91	2	0	4	6	2	2	3	1.73205	1.1547	1.15473	M
93	0	0	3	3	1		1.73205	3	1.73205	1	1.00003	93	4	0	2	6	2	2	3	1.73205	1.1547	1.15473	L
101	1	3	3	7	2.33333		1.1547	3	1.73205	0.666667	0.666686	101	2	0	1	3	1	1	3	1.73205	0.57735	0.577367	L
105	0	5	2	7	2.33333		2.51661	3	1.73205	1.45297	1.45301	105	0	0	2	2	0.666667	1.1547	3	1.73205	0.666667	0.666686	L
109	2	5	1	8	2.66667		2.08167	3	1.73205	1.20185	1.20189	109	0	0	0	0	0	0	3	1.73205	0	0	L
129	2	1	2	5	1.66667		0.57735	3	1.73205	0.333333	0.333343	129	6	7	9	22	7.33333	1.52753	3	1.73205	0.881917	0.881943	H
136	2	2	2	6	2		0	3	1.73205	0	0	136	3	0	1	4	1.33333	1.52753	3	1.73205	0.881917	0.881943	L
138	0	2	3	5	1.66667		1.52753	3	1.73205	0.881917	0.881943	138	0	1	0	1	0.333333	0.57735	3	1.73205	0.333333	0.333343	L
142	5	2	7	14	4.66667		2.51661	3	1.73205	1.45297	1.45301	142	0	1	4	5	1.66667	2.08167	3	1.73205	1.20185	1.20189	M
149	0	0	0	0	0		0	3	1.73205	0	0	149	1	0	0	1	0.333333	0.57735	3	1.73205	0.333333	0.333343	L
153	0	0	3	3	1		1.73205	3	1.73205	1	1.00003	153	0	0	0	0	0	0	3	1.73205	0	0	L
158	0	0	0	0	0		0	3	1.73205	0	0	158	1	0	0	1	0.333333	0.57735	3	1.73205	0.333333	0.333343	L
161	0	1	1	2	0.666667		0.57735	3	1.73205	0.333333	0.333343	161	1	0	0	1	0.333333	0.57735	3	1.73205	0.333333	0.333343	L
176	2	2	0	4	1.33333		1.1547	3	1.73205	0.666667	0.666686	176	1	0	0	1	0.333333	0.57735	3	1.73205	0.333333	0.333343	L
177	0	0	0	0	0		0	3	1.73205	0	0	177	0	0	1	1	0.333333	0.57735	3	1.73205	0.333333	0.333343	L
181	1	0	0	1	0.333333		0.57735	3	1.73205	0.333333	0.333343	181	0	1	0	1	0.333333	0.57735	3	1.73205	0.333333	0.333343	L
189	0	0	0	0	0		0	3	1.73205	0	0	189	0	0	0	0	0	0	3	1.73205	0	0	L
195	0	0	0	0	0		0	3	1.73205	0	0	195	2	4	1	7	2.33333	1.52753	3	1.73205	0.881917	0.881943	M
208 (37-subset)	6	9	10	25	8.33333		2.08167	3	1.73205	1.20185	1.20189	208 (37-subset)	0	1	0	1	0.333333	0.57735	3	1.73205	0.333333	0.333343	M
217	2	3	6	11	3.66667		2.08167	3	1.73205	1.20185	1.20189	217	3	2	0	5	1.66667	1.52753	3	1.73205	0.881917	0.881943	M
223	0	0	0	0	0		0	3	1.73205	0	0	223	0	0	0	0	0	0	3	1.73205	0	0	L
227	10	9	9	28	9.33333		0.57735	3	1.73205	0.333333	0.333343	227	1	0	0	1	0.333333	0.57735	3	1.73205	0.333333	0.333343	M
228	1	1	0	2	0.666667		0.57735	3	1.73205	0.333333	0.333343	228	0	0	0	0	0	0	3	1.73205	0	0	L
229	5	2	7	14	4.66667		2.51661	3	1.73205	1.45297	1.45301	229	2	0	0	2	0.666667	1.1547	3	1.73205	0.666667	0.666686	M
233	0	5	3	8	2.66667		2.51661	3	1.73205	1.45297	1.45301	233	1	0	0	1	0.333333	0.57735	3	1.73205	0.333333	0.333343	M
235	0	3	3	6	2		1.73205	3	1.73205	1	1.00003	235	1	3	0	4	1.33333	1.52753	3	1.73205	0.881917	0.881943	M
237	5	4	1	10	3.33333		2.08167	3	1.73205	1.20185	1.20189	237	5	4	0	9	3	2.64575	3	1.73205	1.52753	1.52757	H
239	6	4	6	16	5.33333		1.1547	3	1.73205	0.666667	0.666686	239	0	0	0	0	0	0	3	1.73205	0	0	M
256	4	7	7	18	6		1.73205	3	1.73205	1	1.00003	256	0	0	0	0	0	0	3	1.73205	0	0	M
272	7	7	5	19	6.33333		1.1547	3	1.73205	0.666667	0.666686	272	0	0	0	0	0	0	3	1.73205	0	0	M
280	4	1	1	6	2		1.73205	3	1.73205	1	1.00003	280	7	6	8	21	7	1	3	1.73205	0.57735	0.577367	H
287	1	1	2	4	1.33333		0.57735	3	1.73205	0.333333	0.333343	287	0	0	0	0	0	0	3	1.73205	0	0	L
301	10	10	4	24	8		3.4641	3	1.73205	2	2.00006	301	8	1	1	10	3.33333	4.04145	3	1.73205	2.33333	2.3334	H
303	1	0	0	1	0.333333		0.57735	3	1.73205	0.333333	0.333343	303	0	0	0	0	0	0	3	1.73205	0	0	L
304 (37-subset)	10	4	2	16	5.33333		4.16333	3	1.73205	2.4037	2.40377	304 (37-subset)	1	1	1	3	1	0	3	1.73205	0	0	M
307 (37-subset)	2	4	6	12	4		2	3	1.73205	1.1547	1.15473	307 (37-subset)	3	0	2	5	1.66667	1.52753	3	1.73205	0.881917	0.881943	M
309	3	2	7	12	4		2.64575	3	1.73205	1.52753	1.52757	309	6	1	1	8	2.66667	2.88675	3	1.73205	1.66667	1.66672	M
310	0	2	3	5	1.66667		1.52753	3	1.73205	0.881917	0.881943	310	0	0	0	0	0	0	3	1.73205	0	0	L
313 (37-subset)	2	8	5	15	5		3	3	1.73205	1.73205	1.7321	313 (37-subset)	1	1	0	2	0.666667	0.57735	3	1.73205	0.333333	0.333343	M
315 (37-subset)	3	8	2	13	4.33333		3.21455	3	1.73205	1.85592	1.85598	315 (37-subset)	0	1	0	1	0.333333	0.57735	3	1.73205	0.333333	0.333343	M
317	1	5	6	12	4		2.64575	3	1.73205	1.52753	1.52757	317	4	1	0	5	1.66667	2.08167	3	1.73205	1.20185	1.20189	M
318	1	0	3	4	1.33333		1.52753	3	1.73205	0.881917	0.881943	318	1	0	0	1	0.333333	0.57735	3	1.73205	0.333333	0.333343	L
320	0	1	4	5	1.66667		2.08167	3	1.73205	1.20185	1.20189	320	0	0	4	4	1.33333	2.3094	3	1.73205	1.33333	1.33337	L
321	0	1	0	1	0.333333		0.57735	3	1.73205	0.333333	0.333343	321	0	0	0	0	0	0	3	1.73205	0	0	L
324 (37-subset)	3	4	1	8	2.66667		1.52753	3	1.73205	0.881917	0.881943	324 (37-subset)	1	0	0	1	0.333333	0.57735	3	1.73205	0.333333	0.333343	M
325	2	4	1	7	2.33333		1.52753	3	1.73205	0.881917	0.881943	325	1	0	0	1	0.333333	0.57735	3	1.73205	0.333333	0.333343	L
332	1	4	0	5	1.66667		2.08167	3	1.73205	1.20185	1.20189	332	0	0	0	0	0	0	3	1.73205	0	0	L
335 (37-subset)	5	5	4	14	4.66667		0.57735	3	1.73205	0.333333	0.333343	335 (37-subset)	0	0	0	0	0	0	3	1.73205	0	0	M
336	1	0	1	2	0.666667		0.57735	3	1.73205	0.333333	0.333343	336	0	0	0	0	0	0	3	1.73205	0	0	L
338	0	3	1	4	1.33333		1.52753	3	1.73205	0.881917	0.881943	338	0	0	0	0	0	0	3	1.73205	0	0	L
340	4	2	0	6	2		2	3	1.73205	1.1547	1.15473	340	0	1	1	2	0.666667	0.57735	3	1.73205	0.333333	0.333343	L
350	5	6	4	15	5		1	3	1.73205	0.57735	0.577367	350	0	1	0	1	0.333333	0.57735	3	1.73205	0.333333	0.333343	M
352	6	N/A	0	6	3		4.24264	2	1.41421	3	2.44956	352	0	0	1	1	0.333333	0.57735	3	1.73205	0.333333	0.333343	M
356	1	8	1	10	3.33333		4.04145	3	1.73205	2.33333	2.3334	356	1	0	0	1	0.333333	0.57735	3	1.73205	0.333333	0.333343	M
357 (37-subset)	0	0	7	7	2.33333		4.04145	3	1.73205	2.33333	2.3334	357 (37-subset)	0	1	0	1	0.333333	0.57735	3	1.73205	0.333333	0.333343	M
358 (37-subset)	7	6	1	14	4.66667		3.21455	3	1.73205	1.85592	1.85598	358 (37-subset)	0	0	0	0	0	0	3	1.73205	0	0	M
359	10	2	0	12	4		5.2915	3	1.73205	3.05505	3.05514	359	0	0	0	0	0	0	3	1.73205	0	0	M
360 (37-subset)	7	0	0	7	2.33333		4.04145	3	1.73205	2.33333	2.3334	360 (37-subset)	0	0	0	0	0	0	3	1.73205	0	0	M
361	5	0	3	8	2.66667		2.51661	3	1.73205	1.45297	1.45301	361	3	0	5	8	2.66667	2.51661	3	1.73205	1.45297	1.45301	M
362 (37-subset)	0	0	2	2	0.666667		1.1547	3	1.73205	0.666667	0.666686	362 (37-subset)	0	0	0	0	0	0	3	1.73205	0	0	L
365 (37-subset)	0	0	0	0	0		0	3	1.73205	0	0	365 (37-subset)	0	0	0	0	0	0	3	1.73205	0	0	L
367	4	4	0	8	2.66667		2.3094	3	1.73205	1.33333	1.33337	367	0	0	0	0	0	0	3	1.73205	0	0	L
370	9	9	4	22	7.33333		2.88675	3	1.73205	1.66667	1.66672	370	1	0	0	1	0.333333	0.57735	3	1.73205	0.333333	0.333343	M
371	7	0	0	7	2.33333		4.04145	3	1.73205	2.33333	2.3334	371	1	0	0	1	0.333333	0.57735	3	1.73205	0.333333	0.333343	L
373	0	4	6	10	3.33333		3.05505	3	1.73205	1.76383	1.76389	373	2	1	1	4	1.33333	0.57735	3	1.73205	0.333333	0.333343	M
374	9	6	3	18	6		3	3	1.73205	1.73205	1.7321	374	1	0	2	3	1	1	3	1.73205	0.57735	0.577367	M
375 (37-subset)	0	8	7	15	5		4.3589	3	1.73205	2.51661	2.51669	375 (37-subset)	0	0	0	0	0	0	3	1.73205	0	0	M
377	3	3	1	7	2.33333		1.1547	3	1.73205	0.666667	0.666686	377	1	1	0	2	0.666667	0.57735	3	1.73205	0.333333	0.333343	L
378	10	2	6	18	6		4	3	1.73205	2.3094	2.30947	378	0	1	0	1	0.333333	0.57735	3	1.73205	0.333333	0.333343	M
379 (37-subset)	N/A	7	0	7	3.5		4.94975	2	1.41421	3.5	2.85782	379 (37-subset)	0	0	0	0	0	0	3	1.73205	0	0	M
380 (37-subset)	0	5	10	15	5		5	3	1.73205	2.88675	2.88684	380 (37-subset)	2	2	3	7	2.33333	0.57735	3	1.73205	0.333333	0.333343	M
381	5	4	6	15	5		1	3	1.73205	0.57735	0.577367	381	0	1	0	1	0.333333	0.57735	3	1.73205	0.333333	0.333343	M
382	9	7	10	26	8.66667		1.52753	3	1.73205	0.881917	0.881943	382	1	2	2	5	1.66667	0.57735	3	1.73205	0.333333	0.333343	M
383	9	4	5	18	6		2.64575	3	1.73205	1.52753	1.52757	383	0	0	0	0	0	0	3	1.73205	0	0	M
385	8	0	0	8	2.66667		4.6188	3	1.73205	2.66667	2.66674	385	1	0	0	1	0.333333	0.57735	3	1.73205	0.333333	0.333343	L
386	2	1	1	4	1.33333		0.57735	3	1.73205	0.333333	0.333343	386	1	1	4	6	2	1.73205	3	1.73205	1	1.00003	L
387	7	6	9	22	7.33333		1.52753	3	1.73205	0.881917	0.881943	387	1	2	1	4	1.33333	0.57735	3	1.73205	0.333333	0.333343	M
391 (37-subset)	7	9	7	23	7.66667		1.1547	3	1.73205	0.666667	0.666686	391 (37-subset)	0	5	1	6	2	2.64575	3	1.73205	1.52753	1.52757	M
392	8	10	1	19	6.33333		4.72582	3	1.73205	2.72845	2.72853	392	0	0	0	0	0	0	3	1.73205	0	0	M
398	8	N/A	9	17	8.5		0.707107	2	1.41421	0.5	0.40826	398	2	1	2	5	1.66667	0.57735	3	1.73205	0.333333	0.333343	M
399 (37-subset)	5	N/A	9	14	7		2.82843	2	1.41421	2	1.63304	399 (37-subset)	4	1	0	5	1.66667	2.08167	3	1.73205	1.20185	1.20189	M
405	2	5	6	13	4.33333		2.08167	3	1.73205	1.20185	1.20189	405	0	0	0	0	0	0	3	1.73205	0	0	M
406	4	6	3	13	4.33333		1.52753	3	1.73205	0.881917	0.881943	406	0	0	0	0	0	0	3	1.73205	0	0	M
409	6	0	0	6	2		3.4641	3	1.73205	2	2.00006	409	1	0	0	1	0.333333	0.57735	3	1.73205	0.333333	0.333343	L
426	0	1	2	3	1		1	3	1.73205	0.57735	0.577367	426	0	0	0	0	0	0	3	1.73205	0	0	L
427 (37-subset)	2	0	2	4	1.33333		1.1547	3	1.73205	0.666667	0.666686	427 (37-subset)	1	1	1	3	1	0	3	1.73205	0	0	L
437 (37-subset)	8	7	9	24	8		1	3	1.73205	0.57735	0.577367	437 (37-subset)	0	0	0	0	0	0	3	1.73205	0	0	M
439	4	7	5	16	5.33333		1.52753	3	1.73205	0.881917	0.881943	439	0	0	0	0	0	0	3	1.73205	0	0	M
440	5	3	1	9	3		2	3	1.73205	1.1547	1.15473	440	1	1	1	3	1	0	3	1.73205	0	0	L
441	0	3	4	7	2.33333		2.08167	3	1.73205	1.20185	1.20189	441	0	2	0	2	0.666667	1.1547	3	1.73205	0.666667	0.666686	L
443	7	0	2	9	3		3.60555	3	1.73205	2.08167	2.08173	443	1	0	1	2	0.666667	0.57735	3	1.73205	0.333333	0.333343	L
461	6	2	0	8	2.66667		3.05505	3	1.73205	1.76383	1.76389	461	1	3	0	4	1.33333	1.52753	3	1.73205	0.881917	0.881943	L
476	8	6	2	16	5.33333		3.05505	3	1.73205	1.76383	1.76389	476	2	1	0	3	1	1	3	1.73205	0.57735	0.577367	M
486 (37-subset)	6	3	1	10	3.33333		2.51661	3	1.73205	1.45297	1.45301	486 (37-subset)	1	3	3	7	2.33333	1.1547	3	1.73205	0.666667	0.666686	M
491	8	3	N/A	11	5.5		3.53553	2	1.41421	2.5	2.0413	491	0	3	0	3	1	1.73205	3	1.73205	1	1.00003	M
492	sick	sick	sick	N/A	N/A		#DIV/0!	3	1.73205	#DIV/0!	N/A	492	sick	sick	sick	N/A	N/A	#DIV/0!	3	1.73205	#DIV/0!	N/A	no rating
502	5	6	4	15	5		1	3	1.73205	0.57735	0.577367	502	2	1	1	4	1.33333	0.57735	3	1.73205	0.333333	0.333343	M
508	3	2	7	12	4		2.64575	3	1.73205	1.52753	1.52757	508	3	5	2	10	3.33333	1.52753	3	1.73205	0.881917	0.881943	H
509	3	3	6	12	4		1.73205	3	1.73205	1	1.00003	509	0	0	0	0	0	0	3	1.73205	0	0	M
513	1	5	3	9	3		2	3	1.73205	1.1547	1.15473	513	1	1	2	4	1.33333	0.57735	3	1.73205	0.333333	0.333343	L
517 (37-subset)	0	9	0	9	3		5.19615	3	1.73205	3	3.00009	517 (37-subset)	2	3	0	5	1.66667	1.52753	3	1.73205	0.881917	0.881943	M
530	5	0	0	5	1.66667		2.88675	3	1.73205	1.66667	1.66672	530	3	1	0	4	1.33333	1.52753	3	1.73205	0.881917	0.881943	L
531	8	8	9	25	8.33333		0.57735	3	1.73205	0.333333	0.333343	531	1	1	2	4	1.33333	0.57735	3	1.73205	0.333333	0.333343	M
535	0	0	1	1	0.333333		0.57735	3	1.73205	0.333333	0.333343	535	0	0	0	0	0	0	3	1.73205	0	0	L
554	7	3	N/A	10	5		2.82843	2	1.41421	2	1.63304	554	0	2	0	2	0.666667	1.1547	3	1.73205	0.666667	0.666686	M
555 (37-subset)	5	6	6	17	5.66667		0.57735	3	1.73205	0.333333	0.333343	555 (37-subset)	0	0	0	0	0	0	3	1.73205	0	0	M
563	3	6	6	15	5		1.73205	3	1.73205	1	1.00003	563	0	1	0	1	0.333333	0.57735	3	1.73205	0.333333	0.333343	M
584	0	9	7	16	5.33333		4.72582	3	1.73205	2.72845	2.72853	584	2	3	1	6	2	1	3	1.73205	0.57735	0.577367	M
589	5	2	2	9	3		1.73205	3	1.73205	1	1.00003	589	0	0	0	0	0	0	3	1.73205	0	0	L
595	7	1	1	9	3		3.4641	3	1.73205	2	2.00006	595	1	5	2	8	2.66667	2.08167	3	1.73205	1.20185	1.20189	L
639	5	10	6	21	7		2.64575	3	1.73205	1.52753	1.52757	639	0	0	1	1	0.333333	0.57735	3	1.73205	0.333333	0.333343	M
642	4	3	9	16	5.33333		3.21455	3	1.73205	1.85592	1.85598	642	0	0	2	2	0.666667	1.1547	3	1.73205	0.666667	0.666686	M
646	2	2	3	7	2.33333		0.57735	3	1.73205	0.333333	0.333343	646	0	1	6	7	2.33333	3.21455	3	1.73205	1.85592	1.85598	L
703	0	3	3	6	2		1.73205	3	1.73205	1	1.00003	703	0	0	0	0	0	0	3	1.73205	0	0	L
705 (37-subset)	3	0	5	8	2.66667		2.51661	3	1.73205	1.45297	1.45301	705 (37-subset)	2	2	2	6	2	0	3	1.73205	0	0	M
707 (37-subset)	2	0	0	2	0.666667		1.1547	3	1.73205	0.666667	0.666686	707 (37-subset)	2	0	0	2	0.666667	1.1547	3	1.73205	0.666667	0.666686	L
712 (37-subset)	8	7	6	21	7		1	3	1.73205	0.57735	0.577367	712 (37-subset)	0	0	0	0	0	0	3	1.73205	0	0	M
714 (37-subset)	8	1	0	9	3		4.3589	3	1.73205	2.51661	2.51669	714 (37-subset)	0	0	0	0	0	0	3	1.73205	0	0	M
716	4	0	2	6	2		2	3	1.73205	1.1547	1.15473	716	0	2	2	4	1.33333	1.1547	3	1.73205	0.666667	0.666686	L
721	0	5	0	5	1.66667		2.88675	3	1.73205	1.66667	1.66672	721	0	4	0	4	1.33333	2.3094	3	1.73205	1.33333	1.33337	L
727	sick	sick	sick	N/A	N/A		#DIV/0!	3	1.73205	#DIV/0!	N/A	727	sick	sick	sick	N/A	N/A	#DIV/0!	3	1.73205	#DIV/0!	N/A	no rating
730 (37-subset)	4	2	6	12	4		2	3	1.73205	1.1547	1.15473	730 (37-subset)	0	7	6	13	4.33333	3.78594	3	1.73205	2.18581	2.18588	H
732 (37-subset)	0	6	2	8	2.66667		3.05505	3	1.73205	1.76383	1.76389	732 (37-subset)	2	0	0	2	0.666667	1.1547	3	1.73205	0.666667	0.666686	M
737	0	0	0	0	0		0	3	1.73205	0	0	737	0	1	0	1	0.333333	0.57735	3	1.73205	0.333333	0.333343	L
738	3	2	0	5	1.66667		1.52753	3	1.73205	0.881917	0.881943	738	0	1	1	2	0.666667	0.57735	3	1.73205	0.333333	0.333343	L
748	1	2	3	6	2		1	3	1.73205	0.57735	0.577367	748	1	1	2	4	1.33333	0.57735	3	1.73205	0.333333	0.333343	L
757	1	0	0	1	0.333333		0.57735	3	1.73205	0.333333	0.333343	757	0	2	1	3	1	1	3	1.73205	0.57735	0.577367	L
761	5	4	2	11	3.66667		1.52753	3	1.73205	0.881917	0.881943	761	1	0	0	1	0.333333	0.57735	3	1.73205	0.333333	0.333343	L
765 (37-subset)	6	7	6	19	6.33333		0.57735	3	1.73205	0.333333	0.333343	765 (37-subset)	0	0	0	0	0	0	3	1.73205	0	0	M
774 (37-subset)	1	N/A	2	3	1.5		0.707107	2	1.41421	0.5	0.40826	774 (37-subset)	2	7	4	13	4.33333	2.51661	3	1.73205	1.45297	1.45301	H
776	7	0	N/A	7	3.5		4.94975	2	1.41421	3.5	2.85782	776	4	7	8	19	6.33333	2.08167	3	1.73205	1.20185	1.20189	H
783	9	8	7	24	8		1	3	1.73205	0.57735	0.577367	783	9	2	6	17	5.66667	3.51188	3	1.73205	2.02759	2.02765	H
786 (37-subset)	1	1	2	4	1.33333		0.57735	3	1.73205	0.333333	0.333343	786 (37-subset)	2	0	1	3	1	1	3	1.73205	0.57735	0.577367	L
787	4	6	4	14	4.66667		1.1547	3	1.73205	0.666667	0.666686	787	2	5	1	8	2.66667	2.08167	3	1.73205	1.20185	1.20189	M
790	1	2	0	3	1		1	3	1.73205	0.57735	0.577367	790	0	0	0	0	0	0	3	1.73205	0	0	L
796	2	9	0	11	3.66667		4.72582	3	1.73205	2.72845	2.72853	796	4	1	1	6	2	1.73205	3	1.73205	1	1.00003	L
799 (37-subset)	0	0	0	0	0		0	3	1.73205	0	0	799 (37-subset)	1	0	0	1	0.333333	0.57735	3	1.73205	0.333333	0.333343	M
801	1	2	3	6	2		1	3	1.73205	0.57735	0.577367	801	2	3	2	7	2.33333	0.57735	3	1.73205	0.333333	0.333343	M
802	4	8	10	22	7.33333		3.05505	3	1.73205	1.76383	1.76389	802	5	2	4	11	3.66667	1.52753	3	1.73205	0.881917	0.881943	H
804	4	6	0	10	3.33333		3.05505	3	1.73205	1.76383	1.76389	804	0	4	4	8	2.66667	2.3094	3	1.73205	1.33333	1.33337	L
805	2	4	1	7	2.33333		1.52753	3	1.73205	0.881917	0.881943	805	5	0	3	8	2.66667	2.51661	3	1.73205	1.45297	1.45301	L
808	N/A	4	0	4	2		2.82843	2	1.41421	2	1.63304	808	0	0	1	1	0.333333	0.57735	3	1.73205	0.333333	0.333343	M
810	8	6	4	18	6		2	3	1.73205	1.1547	1.15473	810	1	3	1	5	1.66667	1.1547	3	1.73205	0.666667	0.666686	M
812	6	5	1	12	4		2.64575	3	1.73205	1.52753	1.52757	812	0	0	1	1	0.333333	0.57735	3	1.73205	0.333333	0.333343	M
818	0	0	0	0	0		0	3	1.73205	0	0	818	0	0	0	0	0	0	3	1.73205	0	0	L
819	4	1	6	11	3.66667		2.51661	3	1.73205	1.45297	1.45301	819	0	0	0	0	0	0	3	1.73205	0	0	L
820 (37-subset)	0	6	0	6	2		3.4641	3	1.73205	2	2.00006	820 (37-subset)	0	0	0	0	0	0	3	1.73205	0	0	L
821	0	0	0	0	0		0	3	1.73205	0	0	821	0	0	0	0	0	0	3	1.73205	0	0	L
822	1	0	0	1	0.333333		0.57735	3	1.73205	0.333333	0.333343	822	0	0	0	0	0	0	3	1.73205	0	0	L
832	5	N/A	2	7	3.5		2.12132	2	1.41421	1.5	1.22478	832	3	2	2	7	2.33333	0.57735	3	1.73205	0.333333	0.333343	M
837	2	0	0	2	0.666667		1.1547	3	1.73205	0.666667	0.666686	837	0	0	0	0	0	0	3	1.73205	0	0	L
843	1	0	0	1	0.333333		0.57735	3	1.73205	0.333333	0.333343	843	0	0	0	0	0	0	3	1.73205	0	0	L
849	2	7	0	9	3		3.60555	3	1.73205	2.08167	2.08173	849	4	2	0	6	2	2	3	1.73205	1.1547	1.15473	L
850	7	0	0	7	2.33333		4.04145	3	1.73205	2.33333	2.3334	850	0	0	0	0	0	0	3	1.73205	0	0	L
852 (37-subset)	N/A	6	N/A	6	6		#DIV/0!	1	1	#DIV/0!	N/A	852 (37-subset)	0	1	0	1	0.333333	0.57735	3	1.73205	0.333333	0.333343	M
853	3	1	0	4	1.33333		1.52753	3	1.73205	0.881917	0.881943	853	0	7	1	8	2.66667	3.78594	3	1.73205	2.18581	2.18588	L
855	5	5	0	10	3.33333		2.88675	3	1.73205	1.66667	1.66672	855	1	1	1	3	1	0	3	1.73205	0	0	L
857	0	3	0	3	1		1.73205	3	1.73205	1	1.00003	857	1	4	0	5	1.66667	2.08167	3	1.73205	1.20185	1.20189	L
859 (37-subset)	0	8	0	8	2.66667		4.6188	3	1.73205	2.66667	2.66674	859 (37-subset)	0	2	2	4	1.33333	1.1547	3	1.73205	0.666667	0.666686	L
861	0	0	0	0	0		0	3	1.73205	0	0	861	0	0	4	4	1.33333	2.3094	3	1.73205	1.33333	1.33337	L
879	8	9	4	21	7		2.64575	3	1.73205	1.52753	1.52757	879	0	4	2	6	2	2	3	1.73205	1.1547	1.15473	M
882	6	0	1	7	2.33333		3.21455	3	1.73205	1.85592	1.85598	882	1	1	0	2	0.666667	0.57735	3	1.73205	0.333333	0.333343	L
884	4	10	2	16	5.33333		4.16333	3	1.73205	2.4037	2.40377	884	9	2	7	18	6	3.60555	3	1.73205	2.08167	2.08173	H
887	3	0	0	3	1		1.73205	3	1.73205	1	1.00003	887	0	0	0	0	0	0	3	1.73205	0	0	L
890	N/A	2	1	3	1.5		0.707107	2	1.41421	0.5	0.40826	890	2	0	0	2	0.666667	1.1547	3	1.73205	0.666667	0.666686	M
892	9	10	0	19	6.33333		5.50757	3	1.73205	3.1798	3.17989	892	3	5	2	10	3.33333	1.52753	3	1.73205	0.881917	0.881943	M
894	sick	sick	sick	N/A	N/A		#DIV/0!	3	1.73205	#DIV/0!	N/A	894	sick	sick	sick	N/A	N/A	#DIV/0!	3	1.73205	#DIV/0!	N/A	no rating
897	8	0	0	8	2.66667		4.6188	3	1.73205	2.66667	2.66674	897	0	0	0	0	0	0	3	1.73205	0	0	L
900	0	0	0	0	0		0	3	1.73205	0	0	900	0	0	1	1	0.333333	0.57735	3	1.73205	0.333333	0.333343	L
907	0	0	0	0	0		0	3	1.73205	0	0	907	0	3	1	4	1.33333	1.52753	3	1.73205	0.881917	0.881943	L
908	0	0	0	0	0		0	3	1.73205	0	0	908	0	1	0	1	0.333333	0.57735	3	1.73205	0.333333	0.333343	L
911	1	1	0	2	0.666667		0.57735	3	1.73205	0.333333	0.333343	911	1	4	3	8	2.66667	1.52753	3	1.73205	0.881917	0.881943	L
913	3	5	0	8	2.66667		2.51661	3	1.73205	1.45297	1.45301	913	0	2	0	2	0.666667	1.1547	3	1.73205	0.666667	0.666686	L
													High Resistance	Medium Resistance	Low Resistance	No Data	Total
													12	83	91	3	189
