# Supplementary material for: α-amanitin resistance in Drosophila melanogaster: A genome-wide association approach
Source: PLoS One. 2017 Feb 27;12(2):e0173162. doi: 10.1371/journal.pone.0173162 (PMC5328632; doi:10.1371/journal.pone.0173162)
Supplement: S2 Table — The LC50 values of the lines are shown in the first tab, and the raw data used to calculate the LC50 values are presented in the second tab of the Excel file. The LC50 values are also graphically represented Fig 1C. (XLSX) [file pone.0173162.s002.xlsx]

## Sheet: LC50 Report
LC50 Results
Strain	LC50	Replicate 1	Replicate 2	Replicate 3	SEM
765	0.001	0.002	0.003	0	0.001
362	0.016	0.014	N/A	0.017	0.001
303	0.018	0.032	0.009	0.013	0.007
786	0.025	0.011	0.043	0.025	0.009
820	0.037	0.029	0.045	0.039	0.005
365	0.042	0.039	0.048	0.04	0.003
799	0.042	0.047	0.046	0.033	0.005
859	0.068	0.064	0.07	0.07	0.002
707	0.097	N/A	0.155	0.069	0.035
427	0.134	N/A	0.187	0.11	0.031
313	0.22	0.181	0.188	0.289	0.035
391	0.281	0.325	0.268	0.249	0.023
360	0.291	0.172	0.409	0.293	0.068
555	0.33	0.411	0.292	0.287	0.041
208	0.344	0.163	0.241	0.571	0.125
732	0.359	0.619	0.455	0.262	0.103
358	0.366	0.467	N/A	0.257	0.086
486	0.396	0.418	0.367	0.405	0.015
705	0.432	0.526	0.383	0.377	0.049
517	0.447	0.401	0.48	0.455	0.023
324	0.494	N/A	0.281	0.729	0.183
714	0.494	0.491	0.438	0.561	0.036
380	0.526	0.473	0.538	0.567	0.028
712	0.528	0.773	0.478	0.281	0.143
357	0.551	N/A	0.693	0.383	0.127
301	0.58	0.615	0.47	0.624	0.05
379	0.58	0.803	0.391	0.533	0.121
852	0.58	0.661	0.556	0.525	0.041
335	0.64	1.025	0.75	0.328	0.203
399	0.642	0.726	0.618	0.573	0.045
304	0.793	0.709	0.837	0.862	0.047
437	0.821	0.807	0.844	0.814	0.011
730	0.941	N/A	0.978	0.899	0.032
774	0.995	0.927	0.977	1.087	0.047
315	1.531	1.837	1.524	1.327	0.148
307	3.305	3.221	3.401	3.3	0.052

## Sheet: Raw Data
STRAIN 208					STRAIN 301					STRAIN 303
Concentration	1	2	3		Concentration	1	2	3		Concentration	1	2	3
0	52	47	50		0	44	39	52		0	75	74	72
0.33	20	20	37		0.66	22	14	20		0.025	47	30	33
0.66	16	10	20		1.33	11	18	25		0.05	41	21	25
1	11	12	13		2	8	7	18		0.075	9	7	6
1.33	10	7	12		2.66	6	8	9		0.1	3	4	4
1.66	6	0	1		3.33	1	6	6		0.25	0	0	1
2	7	0	3		4	0	2	4		0.375	0	0	0
STRAIN 304					STRAIN 307					STRAIN 313
Concentration	1	2	3		Concentration	1	2	3		0	80	80	81
0	78	77	71		0	93	89	92		0.33	32	31	44
0.33	65	60	54		1	79	76	77		0.66	15	16	12
0.66	34	50	49		2	69	72	70		1	3	10	9
1	32	37	31		3	60	61	63		1.33	1	0	5
1.33	23	20	31		4	52	54	56		1.66	0	0	0
1.66	10	19	17		5	32	30	31		2	0	0	0
2	8	18	10		6	20	21	22
					7	11	10	9
					8	8	9	7
					9	2	2	1
					10	0	0	0
STRAIN 315					STRAIN 324					STRAIN 335
Concentration	1	2	3		Concentration	1	2	3 *		Concentration	1	2	3
0	67	62	66		0	69	63	68		0	64	64	71
0.33	56	56	59		0.33	40	53	18		0.33	52	54	46
0.66	49	42	42		0.66	4	34	12		0.66	51	55	7
1	46	38	40		1	7	35	2		1	27	20	0
1.33	41	36	34		1.33	1	3	1		1.33	28	1	1
1.66	31	31	29		1.66	0	5	0		1.66	22	0	1
2	31	24	25		2	0	4	0		2	16	0	0
STRAIN 357					STRAIN 358					STRAIN 360
Concentration	1	2	3**		Concentration	1	2	3*		Concentration	1	2	3
0	60	75	66		0	70	55	63		0	82	81	85
0.33	53	38	13		0.33	34	24	14		0.33	34	48	42
0.66	25	26	18		0.66	39	16	12		0.66	13	22	21
1	14	31	18		1	24	11	6		1	9	21	13
1.33	15	24	14		1.33	16	7	5		1.33	5	15	9
1.66	16	18	14		1.66	11	3	5		1.66	4	2	3
2	8	6	7		2	4	2	3		2	2	0	0
STRAIN 362					STRAIN 365					STRAIN 379
Concentration	1	2	3*		Concentration	1	2	3		Concentration	1	2	3
0	66	72	60		0	86	87	86		0	64	77	71
0.025	47	45	8		0.025	68	69	52		0.33	62	41	54
0.05	2	20	9		0.05	30	48	43		0.66	51	31	25
0.075	1	10	6		0.075	20	21	28		1	22	13	17
0.1	0	15	2		0.1	11	10	22		1.33	7	2	0
0.25	1	14	0		0.25	8	5	8		1.66	0	0	0
0.375	0	11	2		0.375	2	1	3		2	0	0	0
STRAIN 380					STRAIN 391					STRAIN 399
Concentration	1	2	3		Concentration	1	2	3		Concentration	1	2	3
0	83	82	89		0	80	84	81		0	87	89	87
0.33	56	57	60		0.33	38	40	33		0.33	72	68	61
0.66	25	30	40		0.66	29	20	26		0.66	53	40	36
1	19	26	30		1	16	15	19		1	32	29	29
1.33	12	16	20		1.33	14	15	17		1.33	20	18	21
1.66	1	4	5		1.66	8	7	8		1.66	6	5	7
2	0	0	0		2	2	1	1		2	0	0	0
STRAIN 427					STRAIN 437					STRAIN 486
Concentration	1	2	3**		Concentration	1	2	3		Concentration	1	2	3
0	67	67	74		0	80	82	84		0	82	87	91
0.025	47	57	63		0.33	72	73	75		0.33	48	46	41
0.05	51	53	60		0.66	40	43	43		0.66	24	28	39
0.075	43	40	44		1	36	39	41		1	23	22	39
0.1	41	24	50		1.33	31	35	33		1.33	22	15	31
0.25	36	20	41		1.66	15	18	13		1.66	8	9	6
0.375	20	18	47		2	3	5	3		2	1	2	2
STRAIN 517					STRAIN 555					STRAIN 705
Concentration	1	2	3		Concentration	1	2	3		Concentration	1	2	3
0	82	85	84		0	87	83	83		0	77	81	86
0.33	54	58	56		0.33	44	37	38		0.33	48	46	42
0.66	17	28	26		0.66	37	29	24		0.66	42	22	34
1	12	18	15		1	24	12	18		1	20	25	23
1.33	10	7	9		1.33	19	11	16		1.33	1	15	7
1.66	7	3	5		1.66	6	5	6		1.66	1	12	0
2	1	0	1		2	0	0	0		2	0	4	0
STRAIN 707					STRAIN 712					STRAIN 714
Concentration	1	2	3**		Concentration	1	2	3		Concentration	1	2	3
0	89	76	75		0	56	67	64		0	93	98	91
0.025	76	66	28		0.33	45	44	33		0.33	56	57	56
0.05	73	49	28		0.66	52	26	14		0.66	41	37	46
0.075	52	32	22		1	14	15	13		1	25	23	34
0.1	54	27	28		1.33	8	6	11		1.33	17	15	21
0.25	47	0	22		1.66	4	5	6		1.66	6	5	7
0.375	18	0	2		2	0	8	5		2	0	0	0
STRAIN 730					STRAIN 732					STRAIN 765
Concentration	1	2	3*		Concentration	1	2	3		Concentration	1	2	3
0	80	83	85		0	88	79	83		0	87	84	88
0.66	45	46	32		0.33	49	49	33		0.33	11	13	8
1.33	39	32	30		0.66	51	29	27		0.66	6	2	3
2	27	28	26		1	59	17	19		1	3	1	2
2.66	8	21	23		1.33	14	10	6		1.33	3	0	2
3.33	0	5	5		1.66	3	6	0		1.66	0	0	0
4	0	2	4		2	0	0	0		2	0	0	0
STRAIN 774					STRAIN 786					STRAIN 799
Concentration	1	2	3		Concentration	1	2	3		Concentration	1	2	3
0	93	89	86		0	80	82	86		0	80	84	88
0.66	56	52	54		0.025	35	51	48		0.025	59	56	53
1.33	40	44	46		0.05	20	42	36		0.05	37	41	35
2	19	23	26		0.075	11	30	14		0.075	27	30	27
2.66	8	8	7		0.1	8	19	8		0.1	19	24	21
3.33	4	3	4		0.25	0	0	1		0.25	10	10	10
4	0	0	0		0.375	0	0	0		0.375	2	2	1
STRAIN 820					STRAIN 852					STRAIN 859
Concentration	1	2	3		Concentration	1	2	3		Concentration	1	2	3
0	91	87	89		0	82	83	96		0	98	92	94
0.025	64	72	67		0.33	58	57	55		0.025	76	72	78
0.05	25	31	31		0.66	50	32	46		0.05	62	65	63
0.075	18	24	21		1	33	31	43		0.075	51	50	52
0.1	15	17	20		1.33	15	17	14		0.1	20	21	20
0.25	8	7	8		1.66	5	6	5		0.25	10	8	6
0.375	1	1	1		2	0	0	0		0.375	1	1	0
* Data excluded from LC50 analysis due to extrapolation
** Data excluded from LC50 analysis: R2 < 0.6
