# Supplementary material for: α-amanitin resistance in Drosophila melanogaster: A genome-wide association approach
Source: PLoS One. 2017 Feb 27;12(2):e0173162. doi: 10.1371/journal.pone.0173162 (PMC5328632; doi:10.1371/journal.pone.0173162)
Supplement: S4 Table — The two lines with the highest LC50 values were excluded in this file, leading to an improved correlation among the 37-line and the 180-line data on 2.0 μg/g of α-amanitin. (XLSX) [file pone.0173162.s004.xlsx]

## Sheet: WinSTAT Commands
2017-01-23 14:29:04	2017-01-23 14:29:26	2017-01-23 14:30:42
2	51	51
	FALSE	FALSE
	Polynomial Regression	Simple Linear Regression
	LC50 ug/g	LC50 ug/g
	Concentration (2.0 ug/g)	Concentration (0.2 ug/g)
	FALSE	FALSE
	FALSE	FALSE
	DGRP strain number	DGRP strain number
	1	1
	FALSE	FALSE
	DGRP strain number	DGRP strain number
	FALSE	FALSE

## Sheet: WinSTAT Trigger
608
HasTestMacro

## Sheet: Sheet1
DGRP strain number	Concentration (0.2 ug/g)	Concentration (2.0 ug/g)	LC50 ug/g
21	4	1
26	6	1.33333
28	5	0
38	2	0.333333
40	4.33333	1
41	5	1.33333
42	4.33333	1.33333
45	0	0
57	6	0
59	1.33333	0
69	3.66667	0
73	3	0
75	2.33333	0
83	2	0
85	0	5.33333
88	1	0
91	3	2
93	1	2
101	2.33333	1
105	2.33333	0.666667
109	2.66667	0
129	1.66667	7.33333
136	2	1.33333
138	1.66667	0.333333
142	4.66667	1.66667
149	0	0.333333
153	1	0
158	0	0.333333
161	0.666667	0.333333
176	1.33333	0.333333
177	0	0.333333
181	0.333333	0.333333
189	0	0
195	0	2.33333
208 (37-subset)	8.33333	0.333333	0.344
217	3.66667	1.66667
223	0	0
227	9.33333	0.333333
228	0.666667	0
229	4.66667	0.666667
233	2.66667	0.333333
235	2	1.33333
237	3.33333	3
239	5.33333	0
256	6	0
272	6.33333	0
280	2	7
287	1.33333	0
301	8	3.33333	0.058
303	0.333333	0	0.018
304 (37-subset)	5.33333	1	0.793
307 (37-subset)	excluded because high LC50	excluded because high LC50	excluded because high LC50
309	4	2.66667
310	1.66667	0
313 (37-subset)	5	0.666667	0.22
315 (37-subset)	excluded because high LC50	excluded because high LC50	excluded because high LC50
317	4	1.66667
318	1.33333	0.333333
320	1.66667	1.33333
321	0.333333	0
324 (37-subset)	2.66667	0.333333	0.494
325	2.33333	0.333333
332	1.66667	0
335 (37-subset)	4.66667	0	0.64
336	0.666667	0
338	1.33333	0
340	2	0.666667
350	5	0.333333
352	3	0.333333
356	3.33333	0.333333
357 (37-subset)	2.33333	0.333333	0.551
358 (37-subset)	4.66667	0	0.366
359	4	0
360 (37-subset)	2.33333	0	0.291
361	2.66667	2.66667
362 (37-subset)	0.666667	0	0.016
365 (37-subset)	0	0	0.042
367	2.66667	0
370	7.33333	0.333333
371	2.33333	0.333333
373	3.33333	1.33333
374	6	1
375 (37-subset)	5	0	0.075
377	2.33333	0.666667
378	6	0.333333
379 (37-subset)	3.5	0	0.58
380 (37-subset)	5	2.33333	0.526
381	5	0.333333
382	8.66667	1.66667
383	6	0
385	2.66667	0.333333
386	1.33333	2
387	7.33333	1.33333
391 (37-subset)	7.66667	2	0.281
392	6.33333	0
398	8.5	1.66667
399 (37-subset)	7	1.66667	0.642
405	4.33333	0
406	4.33333	0
409	2	0.333333
426	1	0
427 (37-subset)	1.33333	1	0.134
437 (37-subset)	8	0	0.821
439	5.33333	0
440	3	1
441	2.33333	0.666667
443	3	0.666667
461	2.66667	1.33333
476	5.33333	1
486 (37-subset)	3.33333	2.33333	0.396
491	5.5	1
492	N/A	N/A
502	5	1.33333
508	4	3.33333
509	4	0
513	3	1.33333
517 (37-subset)	3	1.66667	0.447
530	1.66667	1.33333
531	8.33333	1.33333
535	0.333333	0
554	5	0.666667
555 (37-subset)	5.66667	0	0.33
563	5	0.333333
584	5.33333	2
589	3	0
595	3	2.66667
639	7	0.333333
642	5.33333	0.666667
646	2.33333	2.33333
703	2	0
705 (37-subset)	2.66667	2	0.432
707 (37-subset)	0.666667	0.666667	0.097
712 (37-subset)	7	0	0.528
714 (37-subset)	3	0	0.494
716	2	1.33333
721	1.66667	1.33333
727	N/A	N/A
730 (37-subset)	4	4.33333	0.941
732 (37-subset)	2.66667	0.666667	0.359
737	0	0.333333
738	1.66667	0.666667
748	2	1.33333
757	0.333333	1
761	3.66667	0.333333
765 (37-subset)	6.33333	0	0.001
774 (37-subset)	1.5	4.33333	0.995
776	3.5	6.33333
783	8	5.66667
786 (37-subset)	1.33333	1	0.025
787	4.66667	2.66667
790	1	0
796	3.66667	2
799 (37-subset)	0	0.333333	0.042
801	2	2.33333
802	7.33333	3.66667
804	3.33333	2.66667
805	2.33333	2.66667
808	2	0.333333
810	6	1.66667
812	4	0.333333
818	0	0
819	3.66667	0
820 (37-subset)	2	0	0.037
821	0	0
822	0.333333	0
832	3.5	2.33333
837	0.666667	0
843	0.333333	0
849	3	2
850	2.33333	0
852 (37-subset)	6	0.333333	0.58
853	1.33333	2.66667
855	3.33333	1
857	1	1.66667
859 (37-subset)	2.66667	1.33333	0.068
861	0	1.33333
879	7	2
882	2.33333	0.666667
884	5.33333	6
887	1	0
890	1.5	0.666667
892	6.33333	3.33333
894	N/A	N/A
897	2.66667	0
900	0	0.333333
907	0	1.33333
908	0	0.333333
911	0.666667	2.66667
913	2.66667	0.666667

## Sheet: Polynomial 0.2 ug
Simple Linear Regression
X-Variable:	LC50 ug/g
Y-Variable:	Concentration (0.2 ug/g)
Y-Weightings:
	N	R	R-Square	Std.Error
normal	35	0.321505	0.103365	2.3685
corrected		0.276033	0.0761944
		0.95
	Coefficient	Conf. (±)	Std.Error	T	P
Constant	2.80746	1.333	0.655188	4.28497	0.000148837
X	2.79577	2.91628	1.43339	1.95046	0.0596576
	LC50 ug/g	Concentration (0.2 ug/g)
	0.344	8.33333
	0.058	8
	0.018	0.333333
	0.793	5.33333
	0.22	5
	0.494	2.66667
	0.64	4.66667
	0.551	2.33333
	0.366	4.66667
	0.291	2.33333
	0.016	0.666667
	0.042	0
	0.075	5
	0.58	3.5
	0.526	5
	0.281	7.66667
	0.642	7
	0.134	1.33333
	0.821	8
	0.396	3.33333
	0.447	3
	0.33	5.66667
	0.432	2.66667
	0.097	0.666667
	0.528	7
	0.494	3
	0.941	4
	0.359	2.66667
	0.001	6.33333
	0.995	1.5
	0.025	1.33333
	0.042	0
	0.037	2
	0.58	6
	0.068	2.66667
	X (Curve)	Y (Curve)
	0.001	2.81025
	0.0110404	2.83832
	0.0210808	2.86639
	0.0311212	2.89446
	0.0411616	2.92254
	0.051202	2.95061
	0.0612424	2.97868
	0.0712828	3.00675
	0.0813232	3.03482
	0.0913636	3.06289
	0.101404	3.09096
	0.111444	3.11903
	0.121485	3.1471
	0.131525	3.17517
	0.141566	3.20324
	0.151606	3.23131
	0.161646	3.25938
	0.171687	3.28745
	0.181727	3.31553
	0.191768	3.3436
	0.201808	3.37167
	0.211848	3.39974
	0.221889	3.42781
	0.231929	3.45588
	0.24197	3.48395
	0.25201	3.51202
	0.262051	3.54009
	0.272091	3.56816
	0.282131	3.59623
	0.292172	3.6243
	0.302212	3.65237
	0.312253	3.68044
	0.322293	3.70851
	0.332333	3.73659
	0.342374	3.76466
	0.352414	3.79273
	0.362455	3.8208
	0.372495	3.84887
	0.382535	3.87694
	0.392576	3.90501
	0.402616	3.93308
	0.412657	3.96115
	0.422697	3.98922
	0.432737	4.01729
	0.442778	4.04536
	0.452818	4.07343
	0.462859	4.1015
	0.472899	4.12958
	0.482939	4.15765
	0.49298	4.18572
	0.50302	4.21379
	0.513061	4.24186
	0.523101	4.26993
	0.533141	4.298
	0.543182	4.32607
	0.553222	4.35414
	0.563263	4.38221
	0.573303	4.41028
	0.583343	4.43835
	0.593384	4.46642
	0.603424	4.49449
	0.613465	4.52257
	0.623505	4.55064
	0.633545	4.57871
	0.643586	4.60678
	0.653626	4.63485
	0.663667	4.66292
	0.673707	4.69099
	0.683747	4.71906
	0.693788	4.74713
	0.703828	4.7752
	0.713869	4.80327
	0.723909	4.83134
	0.733949	4.85941
	0.74399	4.88748
	0.75403	4.91555
	0.764071	4.94363
	0.774111	4.9717
	0.784152	4.99977
	0.794192	5.02784
	0.804232	5.05591
	0.814273	5.08398
	0.824313	5.11205
	0.834354	5.14012
	0.844394	5.16819
	0.854434	5.19626
	0.864475	5.22433
	0.874515	5.2524
	0.884556	5.28047
	0.894596	5.30854
	0.904636	5.33662
	0.914677	5.36469
	0.924717	5.39276
	0.934758	5.42083
	0.944798	5.4489
	0.954838	5.47697
	0.964879	5.50504
	0.974919	5.53311
	0.98496	5.56118
	0.995	5.58925

## Sheet: Polynomial 2.0 ug
Polynomial Regression
X-Variable:	LC50 ug/g
Y-Variable:	Concentration (2.0 ug/g)
Y-Weightings:
	N	R	R-Square	Std.Error
normal	35	0.388272	0.150755	1.14023
corrected		0.353583	0.125021
		0.95
	Coefficient	Conf. (±)	Std.Error	T	P
Constant	0.309968	0.641726	0.315417	0.982724	0.332894
X	1.67018	1.40394	0.690058	2.42034	0.0211729
	LC50 ug/g	Concentration (2.0 ug/g)
	0.344	0.333333
	0.058	3.33333
	0.018	0
	0.793	1
	0.22	0.666667
	0.494	0.333333
	0.64	0
	0.551	0.333333
	0.366	0
	0.291	0
	0.016	0
	0.042	0
	0.075	0
	0.58	0
	0.526	2.33333
	0.281	2
	0.642	1.66667
	0.134	1
	0.821	0
	0.396	2.33333
	0.447	1.66667
	0.33	0
	0.432	2
	0.097	0.666667
	0.528	0
	0.494	0
	0.941	4.33333
	0.359	0.666667
	0.001	0
	0.995	4.33333
	0.025	1
	0.042	0.333333
	0.037	0
	0.58	0.333333
	0.068	1.33333
	X (Curve)	Y (Curve)
	0.001	0.311638
	0.0110404	0.328407
	0.0210808	0.345177
	0.0311212	0.361946
	0.0411616	0.378715
	0.051202	0.395484
	0.0612424	0.412254
	0.0712828	0.429023
	0.0813232	0.445792
	0.0913636	0.462561
	0.101404	0.479331
	0.111444	0.4961
	0.121485	0.512869
	0.131525	0.529638
	0.141566	0.546408
	0.151606	0.563177
	0.161646	0.579946
	0.171687	0.596715
	0.181727	0.613485
	0.191768	0.630254
	0.201808	0.647023
	0.211848	0.663792
	0.221889	0.680562
	0.231929	0.697331
	0.24197	0.7141
	0.25201	0.730869
	0.262051	0.747639
	0.272091	0.764408
	0.282131	0.781177
	0.292172	0.797946
	0.302212	0.814716
	0.312253	0.831485
	0.322293	0.848254
	0.332333	0.865023
	0.342374	0.881793
	0.352414	0.898562
	0.362455	0.915331
	0.372495	0.9321
	0.382535	0.94887
	0.392576	0.965639
	0.402616	0.982408
	0.412657	0.999177
	0.422697	1.01595
	0.432737	1.03272
	0.442778	1.04949
	0.452818	1.06625
	0.462859	1.08302
	0.472899	1.09979
	0.482939	1.11656
	0.49298	1.13333
	0.50302	1.1501
	0.513061	1.16687
	0.523101	1.18364
	0.533141	1.20041
	0.543182	1.21718
	0.553222	1.23395
	0.563263	1.25072
	0.573303	1.26749
	0.583343	1.28425
	0.593384	1.30102
	0.603424	1.31779
	0.613465	1.33456
	0.623505	1.35133
	0.633545	1.3681
	0.643586	1.38487
	0.653626	1.40164
	0.663667	1.41841
	0.673707	1.43518
	0.683747	1.45195
	0.693788	1.46872
	0.703828	1.48549
	0.713869	1.50225
	0.723909	1.51902
	0.733949	1.53579
	0.74399	1.55256
	0.75403	1.56933
	0.764071	1.5861
	0.774111	1.60287
	0.784152	1.61964
	0.794192	1.63641
	0.804232	1.65318
	0.814273	1.66995
	0.824313	1.68672
	0.834354	1.70349
	0.844394	1.72026
	0.854434	1.73702
	0.864475	1.75379
	0.874515	1.77056
	0.884556	1.78733
	0.894596	1.8041
	0.904636	1.82087
	0.914677	1.83764
	0.924717	1.85441
	0.934758	1.87118
	0.944798	1.88795
	0.954838	1.90472
	0.964879	1.92149
	0.974919	1.93826
	0.98496	1.95502
	0.995	1.97179
