# Supplementary material for: α-amanitin resistance in Drosophila melanogaster: A genome-wide association approach
Source: PLoS One. 2017 Feb 27;12(2):e0173162. doi: 10.1371/journal.pone.0173162 (PMC5328632; doi:10.1371/journal.pone.0173162)
Supplement: S5 Table — A cutoff single mixed p-value of 1.00E-03 was used. (XLSX) [file pone.0173162.s005.xlsx]

## Sheet: Table_S4_FDR
								Benjamini & Hochberg False Discovery Rate
Gene_ID	SNP_ID	MinorAllele	MajorAllele	MinorAlleleFrequency	MinorAlleleCount	MajorAlleleCount	SingleMixedPval	37-line GWAS p-value FDR (BH)	SiteClass	GeneDescription
FBgn0037412	3R_2044373_SNP	T	C	0.1081	4	33	4.26e-07	0.0963862	SiteClass[FBgn0037412|Osi4|INTRON|0;FBgn0037411|Osi3|DOWNSTREAM|452],TranscriptAnnot[DOWNSTREAM(MODIFIER||704||288|Osi3|protein_coding|CODING|FBtr0078594||1);DOWNSTREAM(MODIFIER||452||288|Osi3|protein_coding|CODING|FBtr0310414||1);INTRON(MODIFIER||||395|Osi4|protein_coding|CODING|FBtr0334866|3|1);INTRON(MODIFIER||||393|Osi4|protein_coding|CODING|FBtr0078615|3|1)]	The gene Osiris 4 is referred to in FlyBase by the symbol Dmel\Osi4 (CG10303, FBgn0037412). It is a protein_coding_gene from Drosophila melanogaster. It has 2 annotated transcripts and 2 polypeptides (all unique). Gene sequence location is 3R:6218318..6221781. It has the cytological map location 83E1. Protein features are: Protein of unknown function DUF1676. Its molecular function is described b…
FBgn0037411	3R_2044373_SNP	T	C	0.1081	4	33	4.26e-07	0.0963862	SiteClass[FBgn0037412|Osi4|INTRON|0;FBgn0037411|Osi3|DOWNSTREAM|452],TranscriptAnnot[DOWNSTREAM(MODIFIER||704||288|Osi3|protein_coding|CODING|FBtr0078594||1);DOWNSTREAM(MODIFIER||452||288|Osi3|protein_coding|CODING|FBtr0310414||1);INTRON(MODIFIER||||395|Osi4|protein_coding|CODING|FBtr0334866|3|1);INTRON(MODIFIER||||393|Osi4|protein_coding|CODING|FBtr0078615|3|1)]	The gene Osiris 3 is referred to in FlyBase by the symbol Dmel\Osi3 (CG1150, FBgn0037411). It is a protein_coding_gene from Drosophila melanogaster. It has 2 annotated transcripts and 2 polypeptides (1 unique). Gene sequence location is 3R:6215832..6218199. It has the cytological map location 83E1. Protein features are: Protein of unknown function DUF1676. Its molecular function is described by: …
FBtr0078594	3R_2044373_SNP	T	C	0.1081	4	33	4.26e-07	0.0963862	SiteClass[FBgn0037412|Osi4|INTRON|0;FBgn0037411|Osi3|DOWNSTREAM|452],TranscriptAnnot[DOWNSTREAM(MODIFIER||704||288|Osi3|protein_coding|CODING|FBtr0078594||1);DOWNSTREAM(MODIFIER||452||288|Osi3|protein_coding|CODING|FBtr0310414||1);INTRON(MODIFIER||||395|Osi4|protein_coding|CODING|FBtr0334866|3|1);INTRON(MODIFIER||||393|Osi4|protein_coding|CODING|FBtr0078615|3|1)]	-
FBtr0310414	3R_2044373_SNP	T	C	0.1081	4	33	4.26e-07	0.0963862	SiteClass[FBgn0037412|Osi4|INTRON|0;FBgn0037411|Osi3|DOWNSTREAM|452],TranscriptAnnot[DOWNSTREAM(MODIFIER||704||288|Osi3|protein_coding|CODING|FBtr0078594||1);DOWNSTREAM(MODIFIER||452||288|Osi3|protein_coding|CODING|FBtr0310414||1);INTRON(MODIFIER||||395|Osi4|protein_coding|CODING|FBtr0334866|3|1);INTRON(MODIFIER||||393|Osi4|protein_coding|CODING|FBtr0078615|3|1)]	-
FBtr0334866	3R_2044373_SNP	T	C	0.1081	4	33	4.26e-07	0.0963862	SiteClass[FBgn0037412|Osi4|INTRON|0;FBgn0037411|Osi3|DOWNSTREAM|452],TranscriptAnnot[DOWNSTREAM(MODIFIER||704||288|Osi3|protein_coding|CODING|FBtr0078594||1);DOWNSTREAM(MODIFIER||452||288|Osi3|protein_coding|CODING|FBtr0310414||1);INTRON(MODIFIER||||395|Osi4|protein_coding|CODING|FBtr0334866|3|1);INTRON(MODIFIER||||393|Osi4|protein_coding|CODING|FBtr0078615|3|1)]	-
FBtr0078615	3R_2044373_SNP	T	C	0.1081	4	33	4.26e-07	0.0963862	SiteClass[FBgn0037412|Osi4|INTRON|0;FBgn0037411|Osi3|DOWNSTREAM|452],TranscriptAnnot[DOWNSTREAM(MODIFIER||704||288|Osi3|protein_coding|CODING|FBtr0078594||1);DOWNSTREAM(MODIFIER||452||288|Osi3|protein_coding|CODING|FBtr0310414||1);INTRON(MODIFIER||||395|Osi4|protein_coding|CODING|FBtr0334866|3|1);INTRON(MODIFIER||||393|Osi4|protein_coding|CODING|FBtr0078615|3|1)]	-
FBgn0037413	3R_2052626_SNP	A	T	0.1081	4	33	4.26e-07	0.0963862	SiteClass[FBgn0037413|Osi5|UPSTREAM|608],TranscriptAnnot[UPSTREAM(MODIFIER||608||202|Osi5|protein_coding|CODING|FBtr0078595||1);UPSTREAM(MODIFIER||608||201|Osi5|protein_coding|CODING|FBtr0302937||1);INTERGENIC(MODIFIER||||||||||1)]	The gene Osiris 5 is referred to in FlyBase by the symbol Dmel\Osi5 (CG15590, FBgn0037413). It is a protein_coding_gene from Drosophila melanogaster. It has 2 annotated transcripts and 2 polypeptides (all unique). Gene sequence location is 3R:6227512..6228828. It has the cytological map location 83E1. Protein features are: Protein of unknown function DUF1676. Its molecular function is described b…
FBtr0078595	3R_2052626_SNP	A	T	0.1081	4	33	4.26e-07	0.0963862	SiteClass[FBgn0037413|Osi5|UPSTREAM|608],TranscriptAnnot[UPSTREAM(MODIFIER||608||202|Osi5|protein_coding|CODING|FBtr0078595||1);UPSTREAM(MODIFIER||608||201|Osi5|protein_coding|CODING|FBtr0302937||1);INTERGENIC(MODIFIER||||||||||1)]	-
FBtr0302937	3R_2052626_SNP	A	T	0.1081	4	33	4.26e-07	0.0963862	SiteClass[FBgn0037413|Osi5|UPSTREAM|608],TranscriptAnnot[UPSTREAM(MODIFIER||608||202|Osi5|protein_coding|CODING|FBtr0078595||1);UPSTREAM(MODIFIER||608||201|Osi5|protein_coding|CODING|FBtr0302937||1);INTERGENIC(MODIFIER||||||||||1)]	-
FBgn0032406	2L_12076850_SNP	C	T	0.1111	4	32	9.03e-07	0.0963862	SiteClass[FBgn0032406|CG14947|NON_SYNONYMOUS_CODING|0],TranscriptAnnot[NON_SYNONYMOUS_CODING(MODERATE|MISSENSE|Tct/Cct|S10P|270|CG14947|protein_coding|CODING|FBtr0080297|2|1)]	This gene is referred to in FlyBase by the symbol Dmel\CG14947 (FBgn0032406). It is a protein_coding_gene from Drosophila melanogaster. It has one annotated transcript and one polypeptide. Gene sequence location is 2L:12076100..12077739. It has the cytological map location 33C2. Its molecular function is described by: . It is involved in the biological process described with: . One allele is repo…
FBtr0080297	2L_12076850_SNP	C	T	0.1111	4	32	9.03e-07	0.0963862	SiteClass[FBgn0032406|CG14947|NON_SYNONYMOUS_CODING|0],TranscriptAnnot[NON_SYNONYMOUS_CODING(MODERATE|MISSENSE|Tct/Cct|S10P|270|CG14947|protein_coding|CODING|FBtr0080297|2|1)]	-
FBgn0037412	3R_2045407_SNP	T	C	0.1081	4	33	4.26e-07	0.0963862	SiteClass[FBgn0037412|Osi4|NON_SYNONYMOUS_CODING|0],TranscriptAnnot[NON_SYNONYMOUS_CODING(MODERATE|MISSENSE|Gcc/Acc|A351T|395|Osi4|protein_coding|CODING|FBtr0334866|3|1);NON_SYNONYMOUS_CODING(MODERATE|MISSENSE|Gcc/Acc|A351T|393|Osi4|protein_coding|CODING|FBtr0078615|3|1)]	The gene Osiris 4 is referred to in FlyBase by the symbol Dmel\Osi4 (CG10303, FBgn0037412). It is a protein_coding_gene from Drosophila melanogaster. It has 2 annotated transcripts and 2 polypeptides (all unique). Gene sequence location is 3R:6218318..6221781. It has the cytological map location 83E1. Protein features are: Protein of unknown function DUF1676. Its molecular function is described b…
FBtr0334866	3R_2045407_SNP	T	C	0.1081	4	33	4.26e-07	0.0963862	SiteClass[FBgn0037412|Osi4|NON_SYNONYMOUS_CODING|0],TranscriptAnnot[NON_SYNONYMOUS_CODING(MODERATE|MISSENSE|Gcc/Acc|A351T|395|Osi4|protein_coding|CODING|FBtr0334866|3|1);NON_SYNONYMOUS_CODING(MODERATE|MISSENSE|Gcc/Acc|A351T|393|Osi4|protein_coding|CODING|FBtr0078615|3|1)]	-
FBtr0078615	3R_2045407_SNP	T	C	0.1081	4	33	4.26e-07	0.0963862	SiteClass[FBgn0037412|Osi4|NON_SYNONYMOUS_CODING|0],TranscriptAnnot[NON_SYNONYMOUS_CODING(MODERATE|MISSENSE|Gcc/Acc|A351T|395|Osi4|protein_coding|CODING|FBtr0334866|3|1);NON_SYNONYMOUS_CODING(MODERATE|MISSENSE|Gcc/Acc|A351T|393|Osi4|protein_coding|CODING|FBtr0078615|3|1)]	-
FBgn0025574	3R_19707888_SNP	T	C	0.1111	4	32	3.98e-07	0.0963862	SiteClass[FBgn0025574|Pli|INTRON|0],TranscriptAnnot[INTRON(MODIFIER||||424|Pli|protein_coding|CODING|FBtr0084527|2|1);INTRON(MODIFIER||||424|Pli|protein_coding|CODING|FBtr0112907|2|1)]	The gene Pellino is referred to in FlyBase by the symbol Dmel\Pli (CG5212, FBgn0025574). It is a protein_coding_gene from Drosophila melanogaster. It has 2 annotated transcripts and 2 polypeptides (1 unique). Gene sequence location is 3R:23860162..23890052. It has the cytological map location 95C5-95C8. Protein features are: Pellino family. Its molecular function is described by: kinase regulator…
FBtr0084527	3R_19707888_SNP	T	C	0.1111	4	32	3.98e-07	0.0963862	SiteClass[FBgn0025574|Pli|INTRON|0],TranscriptAnnot[INTRON(MODIFIER||||424|Pli|protein_coding|CODING|FBtr0084527|2|1);INTRON(MODIFIER||||424|Pli|protein_coding|CODING|FBtr0112907|2|1)]	-
FBtr0112907	3R_19707888_SNP	T	C	0.1111	4	32	3.98e-07	0.0963862	SiteClass[FBgn0025574|Pli|INTRON|0],TranscriptAnnot[INTRON(MODIFIER||||424|Pli|protein_coding|CODING|FBtr0084527|2|1);INTRON(MODIFIER||||424|Pli|protein_coding|CODING|FBtr0112907|2|1)]	-
FBgn0032406	2L_12076879_SNP	G	C	0.1143	4	31	6.73e-07	0.0963862	SiteClass[FBgn0032406|CG14947|SYNONYMOUS_CODING|0],TranscriptAnnot[SYNONYMOUS_CODING(LOW|SILENT|cgC/cgG|R19|270|CG14947|protein_coding|CODING|FBtr0080297|2|1)]	This gene is referred to in FlyBase by the symbol Dmel\CG14947 (FBgn0032406). It is a protein_coding_gene from Drosophila melanogaster. It has one annotated transcript and one polypeptide. Gene sequence location is 2L:12076100..12077739. It has the cytological map location 33C2. Its molecular function is described by: . It is involved in the biological process described with: . One allele is repo…
FBtr0080297	2L_12076879_SNP	G	C	0.1143	4	31	6.73e-07	0.0963862	SiteClass[FBgn0032406|CG14947|SYNONYMOUS_CODING|0],TranscriptAnnot[SYNONYMOUS_CODING(LOW|SILENT|cgC/cgG|R19|270|CG14947|protein_coding|CODING|FBtr0080297|2|1)]	-
FBgn0053138	2R_9061775_SNP	T	G	0.1143	4	31	6.42e-07	0.0963862	SiteClass[FBgn0053138|AGBE|SYNONYMOUS_CODING|0],TranscriptAnnot[SYNONYMOUS_CODING(LOW|SILENT|ctG/ctT|L559|685|AGBE|protein_coding|CODING|FBtr0087732|4|1)]	The gene 1,4-Alpha-Glucan Branching Enzyme is referred to in FlyBase by the symbol Dmel\AGBE (CG33138, FBgn0053138). It is a protein_coding_gene from Drosophila melanogaster. It has one annotated transcript and one polypeptide. Gene sequence location is 2R:13171401..13174796. It has the cytological map location 49F4. Protein features are: 1,4-alpha-glucan-branching enzyme, GlgB; Alpha-amylase/bra…
FBtr0087732	2R_9061775_SNP	T	G	0.1143	4	31	6.42e-07	0.0963862	SiteClass[FBgn0053138|AGBE|SYNONYMOUS_CODING|0],TranscriptAnnot[SYNONYMOUS_CODING(LOW|SILENT|ctG/ctT|L559|685|AGBE|protein_coding|CODING|FBtr0087732|4|1)]	-
FBgn0053958	2R_14077696_SNP	G	A	0.1143	4	31	1.02e-06	0.0963862	SiteClass[FBgn0053958|CG33958|INTRON|0;FBgn0034318|CG14500|DOWNSTREAM|537],TranscriptAnnot[DOWNSTREAM(MODIFIER||537||190|CG14500|protein_coding|CODING|FBtr0086752||1);INTRON(MODIFIER||||710|CG33958|protein_coding|CODING|FBtr0099994|3|1)]	This gene is referred to in FlyBase by the symbol Dmel\CG33958 (FBgn0053958). It is a protein_coding_gene from Drosophila melanogaster. It has one annotated transcript and one polypeptide. Gene sequence location is 2R:18184382..18192851. It has the cytological map location 55B12. Protein features are: Adenylyl cyclase class-3/4/guanylyl cyclase; Adenylyl cyclase class-4/guanylyl cyclase, conserve…
FBgn0034318	2R_14077696_SNP	G	A	0.1143	4	31	1.02e-06	0.0963862	SiteClass[FBgn0053958|CG33958|INTRON|0;FBgn0034318|CG14500|DOWNSTREAM|537],TranscriptAnnot[DOWNSTREAM(MODIFIER||537||190|CG14500|protein_coding|CODING|FBtr0086752||1);INTRON(MODIFIER||||710|CG33958|protein_coding|CODING|FBtr0099994|3|1)]	This gene is referred to in FlyBase by the symbol Dmel\CG14500 (FBgn0034318). It is a protein_coding_gene from Drosophila melanogaster. It has one annotated transcript and one polypeptide. Gene sequence location is 2R:18188978..18189654. It has the cytological map location 55B12. Protein features are: C-type lectin; C-type lectin fold; C-type lectin-like. Its molecular function is described by: c…
FBtr0086752	2R_14077696_SNP	G	A	0.1143	4	31	1.02e-06	0.0963862	SiteClass[FBgn0053958|CG33958|INTRON|0;FBgn0034318|CG14500|DOWNSTREAM|537],TranscriptAnnot[DOWNSTREAM(MODIFIER||537||190|CG14500|protein_coding|CODING|FBtr0086752||1);INTRON(MODIFIER||||710|CG33958|protein_coding|CODING|FBtr0099994|3|1)]	-
FBtr0099994	2R_14077696_SNP	G	A	0.1143	4	31	1.02e-06	0.0963862	SiteClass[FBgn0053958|CG33958|INTRON|0;FBgn0034318|CG14500|DOWNSTREAM|537],TranscriptAnnot[DOWNSTREAM(MODIFIER||537||190|CG14500|protein_coding|CODING|FBtr0086752||1);INTRON(MODIFIER||||710|CG33958|protein_coding|CODING|FBtr0099994|3|1)]	-
FBgn0266420	2R_14162914_SNP	G	C	0.1081	4	33	8.15e-07	0.0963862	SiteClass[FBgn0266420|Ote|DOWNSTREAM|198],TranscriptAnnot[DOWNSTREAM(MODIFIER||198||424|Ote|protein_coding|CODING|FBtr0086768||1);INTERGENIC(MODIFIER||||||||||1)]	The gene Otefin is referred to in FlyBase by the symbol Dmel\Ote (CG5581, FBgn0266420). It is a protein_coding_gene from Drosophila melanogaster. It has one annotated transcript and one polypeptide. Gene sequence location is 2R:18275607..18277177. It has the cytological map location 55A1. Protein features are: LEM domain; LEM/LEM-like domain. Its molecular function is described by: protein bindin…
FBtr0086768	2R_14162914_SNP	G	C	0.1081	4	33	8.15e-07	0.0963862	SiteClass[FBgn0266420|Ote|DOWNSTREAM|198],TranscriptAnnot[DOWNSTREAM(MODIFIER||198||424|Ote|protein_coding|CODING|FBtr0086768||1);INTERGENIC(MODIFIER||||||||||1)]	-
FBgn0053958	2R_14077958_SNP	T	C	0.1081	4	33	8.15e-07	0.0963862	SiteClass[FBgn0053958|CG33958|INTRON|0;FBgn0034318|CG14500|DOWNSTREAM|799],TranscriptAnnot[DOWNSTREAM(MODIFIER||799||190|CG14500|protein_coding|CODING|FBtr0086752||1);INTRON(MODIFIER||||710|CG33958|protein_coding|CODING|FBtr0099994|3|1)]	This gene is referred to in FlyBase by the symbol Dmel\CG33958 (FBgn0053958). It is a protein_coding_gene from Drosophila melanogaster. It has one annotated transcript and one polypeptide. Gene sequence location is 2R:18184382..18192851. It has the cytological map location 55B12. Protein features are: Adenylyl cyclase class-3/4/guanylyl cyclase; Adenylyl cyclase class-4/guanylyl cyclase, conserve…
FBgn0034318	2R_14077958_SNP	T	C	0.1081	4	33	8.15e-07	0.0963862	SiteClass[FBgn0053958|CG33958|INTRON|0;FBgn0034318|CG14500|DOWNSTREAM|799],TranscriptAnnot[DOWNSTREAM(MODIFIER||799||190|CG14500|protein_coding|CODING|FBtr0086752||1);INTRON(MODIFIER||||710|CG33958|protein_coding|CODING|FBtr0099994|3|1)]	This gene is referred to in FlyBase by the symbol Dmel\CG14500 (FBgn0034318). It is a protein_coding_gene from Drosophila melanogaster. It has one annotated transcript and one polypeptide. Gene sequence location is 2R:18188978..18189654. It has the cytological map location 55B12. Protein features are: C-type lectin; C-type lectin fold; C-type lectin-like. Its molecular function is described by: c…
FBtr0086752	2R_14077958_SNP	T	C	0.1081	4	33	8.15e-07	0.0963862	SiteClass[FBgn0053958|CG33958|INTRON|0;FBgn0034318|CG14500|DOWNSTREAM|799],TranscriptAnnot[DOWNSTREAM(MODIFIER||799||190|CG14500|protein_coding|CODING|FBtr0086752||1);INTRON(MODIFIER||||710|CG33958|protein_coding|CODING|FBtr0099994|3|1)]	-
FBtr0099994	2R_14077958_SNP	T	C	0.1081	4	33	8.15e-07	0.0963862	SiteClass[FBgn0053958|CG33958|INTRON|0;FBgn0034318|CG14500|DOWNSTREAM|799],TranscriptAnnot[DOWNSTREAM(MODIFIER||799||190|CG14500|protein_coding|CODING|FBtr0086752||1);INTRON(MODIFIER||||710|CG33958|protein_coding|CODING|FBtr0099994|3|1)]	-
FBgn0032151	2L_9854994_SNP	G	A	0.1212	4	29	1.13e-06	0.0993403	SiteClass[FBgn0032151|nAChRalpha6|INTRON|0],TranscriptAnnot[INTRON(MODIFIER||||523|nAChRalpha6|protein_coding|CODING|FBtr0079912|2|1);INTRON(MODIFIER||||509|nAChRalpha6|protein_coding|CODING|FBtr0079913|3|1);INTRON(MODIFIER||||494|nAChRalpha6|protein_coding|CODING|FBtr0079914|2|1);INTRON(MODIFIER||||494|nAChRalpha6|protein_coding|CODING|FBtr0079915|3|1);INTRON(MODIFIER||||494|nAChRalpha6|protein_…	The gene nicotinic Acetylcholine Receptor Œ±6 is referred to in FlyBase by the symbol Dmel\nAChRŒ±6 (CG4128, FBgn0032151). It is a protein_coding_gene from Drosophila melanogaster. It has 7 annotated transcripts and 7 polypeptides (6 unique). Gene sequence location is 2L:9793317..9886250. It has the cytological map location 30D1-30E1. Protein features are: Neurotransmitter-gated ion-channel; Neur…
FBtr0079912	2L_9854994_SNP	G	A	0.1212	4	29	1.13e-06	0.0993403	SiteClass[FBgn0032151|nAChRalpha6|INTRON|0],TranscriptAnnot[INTRON(MODIFIER||||523|nAChRalpha6|protein_coding|CODING|FBtr0079912|2|1);INTRON(MODIFIER||||509|nAChRalpha6|protein_coding|CODING|FBtr0079913|3|1);INTRON(MODIFIER||||494|nAChRalpha6|protein_coding|CODING|FBtr0079914|2|1);INTRON(MODIFIER||||494|nAChRalpha6|protein_coding|CODING|FBtr0079915|3|1);INTRON(MODIFIER||||494|nAChRalpha6|protein_…	-
FBtr0079913	2L_9854994_SNP	G	A	0.1212	4	29	1.13e-06	0.0993403	SiteClass[FBgn0032151|nAChRalpha6|INTRON|0],TranscriptAnnot[INTRON(MODIFIER||||523|nAChRalpha6|protein_coding|CODING|FBtr0079912|2|1);INTRON(MODIFIER||||509|nAChRalpha6|protein_coding|CODING|FBtr0079913|3|1);INTRON(MODIFIER||||494|nAChRalpha6|protein_coding|CODING|FBtr0079914|2|1);INTRON(MODIFIER||||494|nAChRalpha6|protein_coding|CODING|FBtr0079915|3|1);INTRON(MODIFIER||||494|nAChRalpha6|protein_…	-
FBtr0079914	2L_9854994_SNP	G	A	0.1212	4	29	1.13e-06	0.0993403	SiteClass[FBgn0032151|nAChRalpha6|INTRON|0],TranscriptAnnot[INTRON(MODIFIER||||523|nAChRalpha6|protein_coding|CODING|FBtr0079912|2|1);INTRON(MODIFIER||||509|nAChRalpha6|protein_coding|CODING|FBtr0079913|3|1);INTRON(MODIFIER||||494|nAChRalpha6|protein_coding|CODING|FBtr0079914|2|1);INTRON(MODIFIER||||494|nAChRalpha6|protein_coding|CODING|FBtr0079915|3|1);INTRON(MODIFIER||||494|nAChRalpha6|protein_…	-
FBtr0079915	2L_9854994_SNP	G	A	0.1212	4	29	1.13e-06	0.0993403	SiteClass[FBgn0032151|nAChRalpha6|INTRON|0],TranscriptAnnot[INTRON(MODIFIER||||523|nAChRalpha6|protein_coding|CODING|FBtr0079912|2|1);INTRON(MODIFIER||||509|nAChRalpha6|protein_coding|CODING|FBtr0079913|3|1);INTRON(MODIFIER||||494|nAChRalpha6|protein_coding|CODING|FBtr0079914|2|1);INTRON(MODIFIER||||494|nAChRalpha6|protein_coding|CODING|FBtr0079915|3|1);INTRON(MODIFIER||||494|nAChRalpha6|protein_…	-
FBtr0079916	2L_9854994_SNP	G	A	0.1212	4	29	1.13e-06	0.0993403	SiteClass[FBgn0032151|nAChRalpha6|INTRON|0],TranscriptAnnot[INTRON(MODIFIER||||523|nAChRalpha6|protein_coding|CODING|FBtr0079912|2|1);INTRON(MODIFIER||||509|nAChRalpha6|protein_coding|CODING|FBtr0079913|3|1);INTRON(MODIFIER||||494|nAChRalpha6|protein_coding|CODING|FBtr0079914|2|1);INTRON(MODIFIER||||494|nAChRalpha6|protein_coding|CODING|FBtr0079915|3|1);INTRON(MODIFIER||||494|nAChRalpha6|protein_…	-
FBtr0303898	2L_9854994_SNP	G	A	0.1212	4	29	1.13e-06	0.0993403	SiteClass[FBgn0032151|nAChRalpha6|INTRON|0],TranscriptAnnot[INTRON(MODIFIER||||523|nAChRalpha6|protein_coding|CODING|FBtr0079912|2|1);INTRON(MODIFIER||||509|nAChRalpha6|protein_coding|CODING|FBtr0079913|3|1);INTRON(MODIFIER||||494|nAChRalpha6|protein_coding|CODING|FBtr0079914|2|1);INTRON(MODIFIER||||494|nAChRalpha6|protein_coding|CODING|FBtr0079915|3|1);INTRON(MODIFIER||||494|nAChRalpha6|protein_…	-
FBtr0331284	2L_9854994_SNP	G	A	0.1212	4	29	1.13e-06	0.0993403	SiteClass[FBgn0032151|nAChRalpha6|INTRON|0],TranscriptAnnot[INTRON(MODIFIER||||523|nAChRalpha6|protein_coding|CODING|FBtr0079912|2|1);INTRON(MODIFIER||||509|nAChRalpha6|protein_coding|CODING|FBtr0079913|3|1);INTRON(MODIFIER||||494|nAChRalpha6|protein_coding|CODING|FBtr0079914|2|1);INTRON(MODIFIER||||494|nAChRalpha6|protein_coding|CODING|FBtr0079915|3|1);INTRON(MODIFIER||||494|nAChRalpha6|protein_…	-
FBgn0038755	3R_15816028_SNP	A	G	0.1111	4	32	4.71e-06	0.138284	SiteClass[FBgn0038755|Hs6st|INTRON|0],TranscriptAnnot[INTRON(MODIFIER||||462|Hs6st|protein_coding|CODING|FBtr0083846|2|1);INTRON(MODIFIER||||462|Hs6st|protein_coding|CODING|FBtr0335240|2|1)]	The gene Heparan sulfate 6-O-sulfotransferase is referred to in FlyBase by the symbol Dmel\Hs6st (CG4451, FBgn0038755). It is a protein_coding_gene from Drosophila melanogaster. It has 2 annotated transcripts and 2 polypeptides (1 unique). Gene sequence location is 3R:19929277..20008512. It has the cytological map location 92B8-92C1. Protein features are: Heparan sulphate 6-sulfotransferase/Prote…
FBtr0083846	3R_15816028_SNP	A	G	0.1111	4	32	4.71e-06	0.138284	SiteClass[FBgn0038755|Hs6st|INTRON|0],TranscriptAnnot[INTRON(MODIFIER||||462|Hs6st|protein_coding|CODING|FBtr0083846|2|1);INTRON(MODIFIER||||462|Hs6st|protein_coding|CODING|FBtr0335240|2|1)]	-
FBtr0335240	3R_15816028_SNP	A	G	0.1111	4	32	4.71e-06	0.138284	SiteClass[FBgn0038755|Hs6st|INTRON|0],TranscriptAnnot[INTRON(MODIFIER||||462|Hs6st|protein_coding|CODING|FBtr0083846|2|1);INTRON(MODIFIER||||462|Hs6st|protein_coding|CODING|FBtr0335240|2|1)]	-
FBgn0039632	3R_24886708_SNP	G	A	0.1111	4	32	2.44e-06	0.138284	SiteClass[FBgn0039632|Cul5|INTRON|0],TranscriptAnnot[INTRON(MODIFIER||||852|Cul5|protein_coding|CODING|FBtr0085417|3|1)]	The gene Cullin 5 is referred to in FlyBase by the symbol Dmel\Cul5 (CG1401, FBgn0039632). It is a protein_coding_gene from Drosophila melanogaster. It has one annotated transcript and one polypeptide. Gene sequence location is 3R:29059272..29062975. It has the cytological map location 98F6. Protein features are: Cullin homology; Cullin protein, neddylation domain; Cullin repeat-like-containing d…
FBtr0085417	3R_24886708_SNP	G	A	0.1111	4	32	2.44e-06	0.138284	SiteClass[FBgn0039632|Cul5|INTRON|0],TranscriptAnnot[INTRON(MODIFIER||||852|Cul5|protein_coding|CODING|FBtr0085417|3|1)]	-
FBgn0015609	2L_17725668_SNP	T	A	0.1111	4	32	2.49e-06	0.138284	SiteClass[FBgn0015609|CadN|INTRON|0],TranscriptAnnot[INTRON(MODIFIER||||3096|CadN|protein_coding|CODING|FBtr0081013|2|1);INTRON(MODIFIER||||3095|CadN|protein_coding|CODING|FBtr0081014|2|1);INTRON(MODIFIER||||3097|CadN|protein_coding|CODING|FBtr0081015|4|1);INTRON(MODIFIER||||3097|CadN|protein_coding|CODING|FBtr0081016|2|1);INTRON(MODIFIER||||3096|CadN|protein_coding|CODING|FBtr0081017|2|1);INTRON…	The gene Cadherin-N is referred to in FlyBase by the symbol Dmel\CadN (CG7100, FBgn0015609). It is a protein_coding_gene from Drosophila melanogaster. It has 12 annotated transcripts and 12 polypeptides (all unique). Gene sequence location is 2L:17647053..17778340. It has the cytological map location 36D2. Protein features are: Cadherin; Cadherin conserved site; Cadherin, cytoplasmic domain; Cadh…
FBtr0081013	2L_17725668_SNP	T	A	0.1111	4	32	2.49e-06	0.138284	SiteClass[FBgn0015609|CadN|INTRON|0],TranscriptAnnot[INTRON(MODIFIER||||3096|CadN|protein_coding|CODING|FBtr0081013|2|1);INTRON(MODIFIER||||3095|CadN|protein_coding|CODING|FBtr0081014|2|1);INTRON(MODIFIER||||3097|CadN|protein_coding|CODING|FBtr0081015|4|1);INTRON(MODIFIER||||3097|CadN|protein_coding|CODING|FBtr0081016|2|1);INTRON(MODIFIER||||3096|CadN|protein_coding|CODING|FBtr0081017|2|1);INTRON…	-
FBtr0081014	2L_17725668_SNP	T	A	0.1111	4	32	2.49e-06	0.138284	SiteClass[FBgn0015609|CadN|INTRON|0],TranscriptAnnot[INTRON(MODIFIER||||3096|CadN|protein_coding|CODING|FBtr0081013|2|1);INTRON(MODIFIER||||3095|CadN|protein_coding|CODING|FBtr0081014|2|1);INTRON(MODIFIER||||3097|CadN|protein_coding|CODING|FBtr0081015|4|1);INTRON(MODIFIER||||3097|CadN|protein_coding|CODING|FBtr0081016|2|1);INTRON(MODIFIER||||3096|CadN|protein_coding|CODING|FBtr0081017|2|1);INTRON…	-
FBtr0081015	2L_17725668_SNP	T	A	0.1111	4	32	2.49e-06	0.138284	SiteClass[FBgn0015609|CadN|INTRON|0],TranscriptAnnot[INTRON(MODIFIER||||3096|CadN|protein_coding|CODING|FBtr0081013|2|1);INTRON(MODIFIER||||3095|CadN|protein_coding|CODING|FBtr0081014|2|1);INTRON(MODIFIER||||3097|CadN|protein_coding|CODING|FBtr0081015|4|1);INTRON(MODIFIER||||3097|CadN|protein_coding|CODING|FBtr0081016|2|1);INTRON(MODIFIER||||3096|CadN|protein_coding|CODING|FBtr0081017|2|1);INTRON…	-
FBtr0081016	2L_17725668_SNP	T	A	0.1111	4	32	2.49e-06	0.138284	SiteClass[FBgn0015609|CadN|INTRON|0],TranscriptAnnot[INTRON(MODIFIER||||3096|CadN|protein_coding|CODING|FBtr0081013|2|1);INTRON(MODIFIER||||3095|CadN|protein_coding|CODING|FBtr0081014|2|1);INTRON(MODIFIER||||3097|CadN|protein_coding|CODING|FBtr0081015|4|1);INTRON(MODIFIER||||3097|CadN|protein_coding|CODING|FBtr0081016|2|1);INTRON(MODIFIER||||3096|CadN|protein_coding|CODING|FBtr0081017|2|1);INTRON…	-
FBtr0081017	2L_17725668_SNP	T	A	0.1111	4	32	2.49e-06	0.138284	SiteClass[FBgn0015609|CadN|INTRON|0],TranscriptAnnot[INTRON(MODIFIER||||3096|CadN|protein_coding|CODING|FBtr0081013|2|1);INTRON(MODIFIER||||3095|CadN|protein_coding|CODING|FBtr0081014|2|1);INTRON(MODIFIER||||3097|CadN|protein_coding|CODING|FBtr0081015|4|1);INTRON(MODIFIER||||3097|CadN|protein_coding|CODING|FBtr0081016|2|1);INTRON(MODIFIER||||3096|CadN|protein_coding|CODING|FBtr0081017|2|1);INTRON…	-
FBtr0081018	2L_17725668_SNP	T	A	0.1111	4	32	2.49e-06	0.138284	SiteClass[FBgn0015609|CadN|INTRON|0],TranscriptAnnot[INTRON(MODIFIER||||3096|CadN|protein_coding|CODING|FBtr0081013|2|1);INTRON(MODIFIER||||3095|CadN|protein_coding|CODING|FBtr0081014|2|1);INTRON(MODIFIER||||3097|CadN|protein_coding|CODING|FBtr0081015|4|1);INTRON(MODIFIER||||3097|CadN|protein_coding|CODING|FBtr0081016|2|1);INTRON(MODIFIER||||3096|CadN|protein_coding|CODING|FBtr0081017|2|1);INTRON…	-
FBtr0081019	2L_17725668_SNP	T	A	0.1111	4	32	2.49e-06	0.138284	SiteClass[FBgn0015609|CadN|INTRON|0],TranscriptAnnot[INTRON(MODIFIER||||3096|CadN|protein_coding|CODING|FBtr0081013|2|1);INTRON(MODIFIER||||3095|CadN|protein_coding|CODING|FBtr0081014|2|1);INTRON(MODIFIER||||3097|CadN|protein_coding|CODING|FBtr0081015|4|1);INTRON(MODIFIER||||3097|CadN|protein_coding|CODING|FBtr0081016|2|1);INTRON(MODIFIER||||3096|CadN|protein_coding|CODING|FBtr0081017|2|1);INTRON…	-
FBtr0081020	2L_17725668_SNP	T	A	0.1111	4	32	2.49e-06	0.138284	SiteClass[FBgn0015609|CadN|INTRON|0],TranscriptAnnot[INTRON(MODIFIER||||3096|CadN|protein_coding|CODING|FBtr0081013|2|1);INTRON(MODIFIER||||3095|CadN|protein_coding|CODING|FBtr0081014|2|1);INTRON(MODIFIER||||3097|CadN|protein_coding|CODING|FBtr0081015|4|1);INTRON(MODIFIER||||3097|CadN|protein_coding|CODING|FBtr0081016|2|1);INTRON(MODIFIER||||3096|CadN|protein_coding|CODING|FBtr0081017|2|1);INTRON…	-
FBtr0100313	2L_17725668_SNP	T	A	0.1111	4	32	2.49e-06	0.138284	SiteClass[FBgn0015609|CadN|INTRON|0],TranscriptAnnot[INTRON(MODIFIER||||3096|CadN|protein_coding|CODING|FBtr0081013|2|1);INTRON(MODIFIER||||3095|CadN|protein_coding|CODING|FBtr0081014|2|1);INTRON(MODIFIER||||3097|CadN|protein_coding|CODING|FBtr0081015|4|1);INTRON(MODIFIER||||3097|CadN|protein_coding|CODING|FBtr0081016|2|1);INTRON(MODIFIER||||3096|CadN|protein_coding|CODING|FBtr0081017|2|1);INTRON…	-
FBtr0100314	2L_17725668_SNP	T	A	0.1111	4	32	2.49e-06	0.138284	SiteClass[FBgn0015609|CadN|INTRON|0],TranscriptAnnot[INTRON(MODIFIER||||3096|CadN|protein_coding|CODING|FBtr0081013|2|1);INTRON(MODIFIER||||3095|CadN|protein_coding|CODING|FBtr0081014|2|1);INTRON(MODIFIER||||3097|CadN|protein_coding|CODING|FBtr0081015|4|1);INTRON(MODIFIER||||3097|CadN|protein_coding|CODING|FBtr0081016|2|1);INTRON(MODIFIER||||3096|CadN|protein_coding|CODING|FBtr0081017|2|1);INTRON…	-
FBtr0100315	2L_17725668_SNP	T	A	0.1111	4	32	2.49e-06	0.138284	SiteClass[FBgn0015609|CadN|INTRON|0],TranscriptAnnot[INTRON(MODIFIER||||3096|CadN|protein_coding|CODING|FBtr0081013|2|1);INTRON(MODIFIER||||3095|CadN|protein_coding|CODING|FBtr0081014|2|1);INTRON(MODIFIER||||3097|CadN|protein_coding|CODING|FBtr0081015|4|1);INTRON(MODIFIER||||3097|CadN|protein_coding|CODING|FBtr0081016|2|1);INTRON(MODIFIER||||3096|CadN|protein_coding|CODING|FBtr0081017|2|1);INTRON…	-
FBtr0100316	2L_17725668_SNP	T	A	0.1111	4	32	2.49e-06	0.138284	SiteClass[FBgn0015609|CadN|INTRON|0],TranscriptAnnot[INTRON(MODIFIER||||3096|CadN|protein_coding|CODING|FBtr0081013|2|1);INTRON(MODIFIER||||3095|CadN|protein_coding|CODING|FBtr0081014|2|1);INTRON(MODIFIER||||3097|CadN|protein_coding|CODING|FBtr0081015|4|1);INTRON(MODIFIER||||3097|CadN|protein_coding|CODING|FBtr0081016|2|1);INTRON(MODIFIER||||3096|CadN|protein_coding|CODING|FBtr0081017|2|1);INTRON…	-
FBgn0261698	2R_6254262_SNP	C	A	0.1143	4	31	3.34e-06	0.138284	SiteClass[FBgn0261698|CG42732|INTRON|0],TranscriptAnnot[INTRON(MODIFIER||||1878|CG42732|protein_coding|CODING|FBtr0303080|2|1);INTRON(MODIFIER||||1774|CG42732|protein_coding|CODING|FBtr0303081|2|1);INTRON(MODIFIER||||1707|CG42732|protein_coding|CODING|FBtr0303083|2|1);INTRON(MODIFIER||||1438|CG42732|protein_coding|CODING|FBtr0305946|2|1);INTRON(MODIFIER||||1742|CG42732|protein_coding|CODING|FBtr0…	This gene is referred to in FlyBase by the symbol Dmel\CG42732 (FBgn0261698). It is a protein_coding_gene from Drosophila melanogaster. It has 9 annotated transcripts and 9 polypeptides (all unique). Gene sequence location is 2R:10322195..10416996. It has the cytological map location 47A3-47A4. Protein features are: NAD(P)-binding domain; Potassium channel domain; Potassium channel, calcium-activ…
FBtr0303080	2R_6254262_SNP	C	A	0.1143	4	31	3.34e-06	0.138284	SiteClass[FBgn0261698|CG42732|INTRON|0],TranscriptAnnot[INTRON(MODIFIER||||1878|CG42732|protein_coding|CODING|FBtr0303080|2|1);INTRON(MODIFIER||||1774|CG42732|protein_coding|CODING|FBtr0303081|2|1);INTRON(MODIFIER||||1707|CG42732|protein_coding|CODING|FBtr0303083|2|1);INTRON(MODIFIER||||1438|CG42732|protein_coding|CODING|FBtr0305946|2|1);INTRON(MODIFIER||||1742|CG42732|protein_coding|CODING|FBtr0…	-
FBtr0303081	2R_6254262_SNP	C	A	0.1143	4	31	3.34e-06	0.138284	SiteClass[FBgn0261698|CG42732|INTRON|0],TranscriptAnnot[INTRON(MODIFIER||||1878|CG42732|protein_coding|CODING|FBtr0303080|2|1);INTRON(MODIFIER||||1774|CG42732|protein_coding|CODING|FBtr0303081|2|1);INTRON(MODIFIER||||1707|CG42732|protein_coding|CODING|FBtr0303083|2|1);INTRON(MODIFIER||||1438|CG42732|protein_coding|CODING|FBtr0305946|2|1);INTRON(MODIFIER||||1742|CG42732|protein_coding|CODING|FBtr0…	-
FBtr0303083	2R_6254262_SNP	C	A	0.1143	4	31	3.34e-06	0.138284	SiteClass[FBgn0261698|CG42732|INTRON|0],TranscriptAnnot[INTRON(MODIFIER||||1878|CG42732|protein_coding|CODING|FBtr0303080|2|1);INTRON(MODIFIER||||1774|CG42732|protein_coding|CODING|FBtr0303081|2|1);INTRON(MODIFIER||||1707|CG42732|protein_coding|CODING|FBtr0303083|2|1);INTRON(MODIFIER||||1438|CG42732|protein_coding|CODING|FBtr0305946|2|1);INTRON(MODIFIER||||1742|CG42732|protein_coding|CODING|FBtr0…	-
FBtr0305946	2R_6254262_SNP	C	A	0.1143	4	31	3.34e-06	0.138284	SiteClass[FBgn0261698|CG42732|INTRON|0],TranscriptAnnot[INTRON(MODIFIER||||1878|CG42732|protein_coding|CODING|FBtr0303080|2|1);INTRON(MODIFIER||||1774|CG42732|protein_coding|CODING|FBtr0303081|2|1);INTRON(MODIFIER||||1707|CG42732|protein_coding|CODING|FBtr0303083|2|1);INTRON(MODIFIER||||1438|CG42732|protein_coding|CODING|FBtr0305946|2|1);INTRON(MODIFIER||||1742|CG42732|protein_coding|CODING|FBtr0…	-
FBtr0329869	2R_6254262_SNP	C	A	0.1143	4	31	3.34e-06	0.138284	SiteClass[FBgn0261698|CG42732|INTRON|0],TranscriptAnnot[INTRON(MODIFIER||||1878|CG42732|protein_coding|CODING|FBtr0303080|2|1);INTRON(MODIFIER||||1774|CG42732|protein_coding|CODING|FBtr0303081|2|1);INTRON(MODIFIER||||1707|CG42732|protein_coding|CODING|FBtr0303083|2|1);INTRON(MODIFIER||||1438|CG42732|protein_coding|CODING|FBtr0305946|2|1);INTRON(MODIFIER||||1742|CG42732|protein_coding|CODING|FBtr0…	-
FBtr0330616	2R_6254262_SNP	C	A	0.1143	4	31	3.34e-06	0.138284	SiteClass[FBgn0261698|CG42732|INTRON|0],TranscriptAnnot[INTRON(MODIFIER||||1878|CG42732|protein_coding|CODING|FBtr0303080|2|1);INTRON(MODIFIER||||1774|CG42732|protein_coding|CODING|FBtr0303081|2|1);INTRON(MODIFIER||||1707|CG42732|protein_coding|CODING|FBtr0303083|2|1);INTRON(MODIFIER||||1438|CG42732|protein_coding|CODING|FBtr0305946|2|1);INTRON(MODIFIER||||1742|CG42732|protein_coding|CODING|FBtr0…	-
FBgn0031730	2L_5712853_SNP	A	T	0.1143	4	31	4.84e-06	0.138284	SiteClass[FBgn0031730|CG7236|SYNONYMOUS_CODING|0],TranscriptAnnot[SYNONYMOUS_CODING(LOW|SILENT|acT/acA|T200|412|CG7236|protein_coding|CODING|FBtr0343388|3|1);SYNONYMOUS_CODING(LOW|SILENT|acT/acA|T226|438|CG7236|protein_coding|CODING|FBtr0343387|3|1);SYNONYMOUS_CODING(LOW|SILENT|acT/acA|T223|435|CG7236|protein_coding|CODING|FBtr0302950|3|1);SYNONYMOUS_CODING(LOW|SILENT|acT/acA|T209|421|CG7236|prot…	This gene is referred to in FlyBase by the symbol Dmel\CG7236 (FBgn0031730). It is a protein_coding_gene from Drosophila melanogaster. It has 4 annotated transcripts and 4 polypeptides (all unique). Gene sequence location is 2L:5706374..5713791. It has the cytological map location 25F3. Protein features are: Protein kinase domain; Protein kinase, ATP binding site; Protein kinase-like domain; Seri…
FBtr0343388	2L_5712853_SNP	A	T	0.1143	4	31	4.84e-06	0.138284	SiteClass[FBgn0031730|CG7236|SYNONYMOUS_CODING|0],TranscriptAnnot[SYNONYMOUS_CODING(LOW|SILENT|acT/acA|T200|412|CG7236|protein_coding|CODING|FBtr0343388|3|1);SYNONYMOUS_CODING(LOW|SILENT|acT/acA|T226|438|CG7236|protein_coding|CODING|FBtr0343387|3|1);SYNONYMOUS_CODING(LOW|SILENT|acT/acA|T223|435|CG7236|protein_coding|CODING|FBtr0302950|3|1);SYNONYMOUS_CODING(LOW|SILENT|acT/acA|T209|421|CG7236|prot…	-
FBtr0343387	2L_5712853_SNP	A	T	0.1143	4	31	4.84e-06	0.138284	SiteClass[FBgn0031730|CG7236|SYNONYMOUS_CODING|0],TranscriptAnnot[SYNONYMOUS_CODING(LOW|SILENT|acT/acA|T200|412|CG7236|protein_coding|CODING|FBtr0343388|3|1);SYNONYMOUS_CODING(LOW|SILENT|acT/acA|T226|438|CG7236|protein_coding|CODING|FBtr0343387|3|1);SYNONYMOUS_CODING(LOW|SILENT|acT/acA|T223|435|CG7236|protein_coding|CODING|FBtr0302950|3|1);SYNONYMOUS_CODING(LOW|SILENT|acT/acA|T209|421|CG7236|prot…	-
FBtr0302950	2L_5712853_SNP	A	T	0.1143	4	31	4.84e-06	0.138284	SiteClass[FBgn0031730|CG7236|SYNONYMOUS_CODING|0],TranscriptAnnot[SYNONYMOUS_CODING(LOW|SILENT|acT/acA|T200|412|CG7236|protein_coding|CODING|FBtr0343388|3|1);SYNONYMOUS_CODING(LOW|SILENT|acT/acA|T226|438|CG7236|protein_coding|CODING|FBtr0343387|3|1);SYNONYMOUS_CODING(LOW|SILENT|acT/acA|T223|435|CG7236|protein_coding|CODING|FBtr0302950|3|1);SYNONYMOUS_CODING(LOW|SILENT|acT/acA|T209|421|CG7236|prot…	-
FBtr0343389	2L_5712853_SNP	A	T	0.1143	4	31	4.84e-06	0.138284	SiteClass[FBgn0031730|CG7236|SYNONYMOUS_CODING|0],TranscriptAnnot[SYNONYMOUS_CODING(LOW|SILENT|acT/acA|T200|412|CG7236|protein_coding|CODING|FBtr0343388|3|1);SYNONYMOUS_CODING(LOW|SILENT|acT/acA|T226|438|CG7236|protein_coding|CODING|FBtr0343387|3|1);SYNONYMOUS_CODING(LOW|SILENT|acT/acA|T223|435|CG7236|protein_coding|CODING|FBtr0302950|3|1);SYNONYMOUS_CODING(LOW|SILENT|acT/acA|T209|421|CG7236|prot…	-
FBgn0259223	X_18320081_SNP	G	A	0.1111	4	32	5.27e-06	0.138284	SiteClass[FBgn0259223|CG42323|INTRON|0],TranscriptAnnot[INTRON(MODIFIER||||151|CG42323|protein_coding|CODING|FBtr0299774|2|1);INTRON(MODIFIER||||259|CG42323|protein_coding|CODING|FBtr0299776|3|1)]	This gene is referred to in FlyBase by the symbol Dmel\CG42323 (FBgn0259223). It is a protein_coding_gene from Drosophila melanogaster. It has 2 annotated transcripts and 2 polypeptides (all unique). Gene sequence location is X:18422413..18427001. It has the cytological map location 17B1. Its molecular function is described by: . It is involved in the biological process described with: . 5 allele…
FBtr0299774	X_18320081_SNP	G	A	0.1111	4	32	5.27e-06	0.138284	SiteClass[FBgn0259223|CG42323|INTRON|0],TranscriptAnnot[INTRON(MODIFIER||||151|CG42323|protein_coding|CODING|FBtr0299774|2|1);INTRON(MODIFIER||||259|CG42323|protein_coding|CODING|FBtr0299776|3|1)]	-
FBtr0299776	X_18320081_SNP	G	A	0.1111	4	32	5.27e-06	0.138284	SiteClass[FBgn0259223|CG42323|INTRON|0],TranscriptAnnot[INTRON(MODIFIER||||151|CG42323|protein_coding|CODING|FBtr0299774|2|1);INTRON(MODIFIER||||259|CG42323|protein_coding|CODING|FBtr0299776|3|1)]	-
FBgn0031736	2L_5725321_DEL	T	TTAT	0.1111	4	32	5.32e-06	0.138284	SiteClass[FBgn0031736|CG11030|INTRON|0],TranscriptAnnot[INTRON(MODIFIER||||332|CG11030|protein_coding|CODING|FBtr0079135|1|1);INTRON(MODIFIER||||332|CG11030|protein_coding|CODING|FBtr0332554|1|1)]	This gene is referred to in FlyBase by the symbol Dmel\CG11030 (FBgn0031736). It is a protein_coding_gene from Drosophila melanogaster. It has 2 annotated transcripts and 2 polypeptides (1 unique). Gene sequence location is 2L:5724656..5762420. It has the cytological map location 25F3-25F4. Protein features are: Sas10/Utp3/C1D. Its molecular function is unknown. The biological processes in which …
FBtr0079135	2L_5725321_DEL	T	TTAT	0.1111	4	32	5.32e-06	0.138284	SiteClass[FBgn0031736|CG11030|INTRON|0],TranscriptAnnot[INTRON(MODIFIER||||332|CG11030|protein_coding|CODING|FBtr0079135|1|1);INTRON(MODIFIER||||332|CG11030|protein_coding|CODING|FBtr0332554|1|1)]	-
FBtr0332554	2L_5725321_DEL	T	TTAT	0.1111	4	32	5.32e-06	0.138284	SiteClass[FBgn0031736|CG11030|INTRON|0],TranscriptAnnot[INTRON(MODIFIER||||332|CG11030|protein_coding|CODING|FBtr0079135|1|1);INTRON(MODIFIER||||332|CG11030|protein_coding|CODING|FBtr0332554|1|1)]	-
FBgn0051665	2L_1853515_SNP	C	T	0.1111	4	32	5.36e-06	0.138284	SiteClass[FBgn0051665|wry|SYNONYMOUS_CODING|0],TranscriptAnnot[SYNONYMOUS_CODING(LOW|SILENT|aaT/aaC|N865|1154|wry|protein_coding|CODING|FBtr0304911|8|1);SYNONYMOUS_CODING(LOW|SILENT|aaT/aaC|N865|1157|wry|protein_coding|CODING|FBtr0089786|9|1);SYNONYMOUS_CODING(LOW|SILENT|aaT/aaC|N866|1155|wry|protein_coding|CODING|FBtr0334823|9|1)]	The gene weary is referred to in FlyBase by the symbol Dmel\wry (CG31665, FBgn0051665). It is a protein_coding_gene from Drosophila melanogaster. It has 3 annotated transcripts and 3 polypeptides (all unique). Gene sequence location is 2L:1836538..1858550. It has the cytological map location 22B3-22B4. Protein features are: EGF-like calcium-binding domain; EGF-like calcium-binding, conserved site…
FBtr0304911	2L_1853515_SNP	C	T	0.1111	4	32	5.36e-06	0.138284	SiteClass[FBgn0051665|wry|SYNONYMOUS_CODING|0],TranscriptAnnot[SYNONYMOUS_CODING(LOW|SILENT|aaT/aaC|N865|1154|wry|protein_coding|CODING|FBtr0304911|8|1);SYNONYMOUS_CODING(LOW|SILENT|aaT/aaC|N865|1157|wry|protein_coding|CODING|FBtr0089786|9|1);SYNONYMOUS_CODING(LOW|SILENT|aaT/aaC|N866|1155|wry|protein_coding|CODING|FBtr0334823|9|1)]	-
FBtr0089786	2L_1853515_SNP	C	T	0.1111	4	32	5.36e-06	0.138284	SiteClass[FBgn0051665|wry|SYNONYMOUS_CODING|0],TranscriptAnnot[SYNONYMOUS_CODING(LOW|SILENT|aaT/aaC|N865|1154|wry|protein_coding|CODING|FBtr0304911|8|1);SYNONYMOUS_CODING(LOW|SILENT|aaT/aaC|N865|1157|wry|protein_coding|CODING|FBtr0089786|9|1);SYNONYMOUS_CODING(LOW|SILENT|aaT/aaC|N866|1155|wry|protein_coding|CODING|FBtr0334823|9|1)]	-
FBtr0334823	2L_1853515_SNP	C	T	0.1111	4	32	5.36e-06	0.138284	SiteClass[FBgn0051665|wry|SYNONYMOUS_CODING|0],TranscriptAnnot[SYNONYMOUS_CODING(LOW|SILENT|aaT/aaC|N865|1154|wry|protein_coding|CODING|FBtr0304911|8|1);SYNONYMOUS_CODING(LOW|SILENT|aaT/aaC|N865|1157|wry|protein_coding|CODING|FBtr0089786|9|1);SYNONYMOUS_CODING(LOW|SILENT|aaT/aaC|N866|1155|wry|protein_coding|CODING|FBtr0334823|9|1)]	-
FBgn0031736	2L_5725162_SNP	C	G	0.1081	4	33	5.63e-06	0.138284	SiteClass[FBgn0031736|CG11030|UTR_5_PRIME|0],TranscriptAnnot[UTR_5_PRIME(MODIFIER||58||332|CG11030|protein_coding|CODING|FBtr0332554|1|1);UTR_5_PRIME(MODIFIER||58||332|CG11030|protein_coding|CODING|FBtr0079135|1|1)]	This gene is referred to in FlyBase by the symbol Dmel\CG11030 (FBgn0031736). It is a protein_coding_gene from Drosophila melanogaster. It has 2 annotated transcripts and 2 polypeptides (1 unique). Gene sequence location is 2L:5724656..5762420. It has the cytological map location 25F3-25F4. Protein features are: Sas10/Utp3/C1D. Its molecular function is unknown. The biological processes in which …
FBtr0332554	2L_5725162_SNP	C	G	0.1081	4	33	5.63e-06	0.138284	SiteClass[FBgn0031736|CG11030|UTR_5_PRIME|0],TranscriptAnnot[UTR_5_PRIME(MODIFIER||58||332|CG11030|protein_coding|CODING|FBtr0332554|1|1);UTR_5_PRIME(MODIFIER||58||332|CG11030|protein_coding|CODING|FBtr0079135|1|1)]	-
FBtr0079135	2L_5725162_SNP	C	G	0.1081	4	33	5.63e-06	0.138284	SiteClass[FBgn0031736|CG11030|UTR_5_PRIME|0],TranscriptAnnot[UTR_5_PRIME(MODIFIER||58||332|CG11030|protein_coding|CODING|FBtr0332554|1|1);UTR_5_PRIME(MODIFIER||58||332|CG11030|protein_coding|CODING|FBtr0079135|1|1)]	-
FBgn0031736	2L_5725168_SNP	C	T	0.1081	4	33	5.63e-06	0.138284	SiteClass[FBgn0031736|CG11030|UTR_5_PRIME|0],TranscriptAnnot[UTR_5_PRIME(MODIFIER||52||332|CG11030|protein_coding|CODING|FBtr0332554|1|1);UTR_5_PRIME(MODIFIER||52||332|CG11030|protein_coding|CODING|FBtr0079135|1|1)]	This gene is referred to in FlyBase by the symbol Dmel\CG11030 (FBgn0031736). It is a protein_coding_gene from Drosophila melanogaster. It has 2 annotated transcripts and 2 polypeptides (1 unique). Gene sequence location is 2L:5724656..5762420. It has the cytological map location 25F3-25F4. Protein features are: Sas10/Utp3/C1D. Its molecular function is unknown. The biological processes in which …
FBtr0332554	2L_5725168_SNP	C	T	0.1081	4	33	5.63e-06	0.138284	SiteClass[FBgn0031736|CG11030|UTR_5_PRIME|0],TranscriptAnnot[UTR_5_PRIME(MODIFIER||52||332|CG11030|protein_coding|CODING|FBtr0332554|1|1);UTR_5_PRIME(MODIFIER||52||332|CG11030|protein_coding|CODING|FBtr0079135|1|1)]	-
FBtr0079135	2L_5725168_SNP	C	T	0.1081	4	33	5.63e-06	0.138284	SiteClass[FBgn0031736|CG11030|UTR_5_PRIME|0],TranscriptAnnot[UTR_5_PRIME(MODIFIER||52||332|CG11030|protein_coding|CODING|FBtr0332554|1|1);UTR_5_PRIME(MODIFIER||52||332|CG11030|protein_coding|CODING|FBtr0079135|1|1)]	-
FBgn0031736	2L_5725207_SNP	G	A	0.1081	4	33	5.63e-06	0.138284	SiteClass[FBgn0031736|CG11030|UTR_5_PRIME|0],TranscriptAnnot[UTR_5_PRIME(MODIFIER||13||332|CG11030|protein_coding|CODING|FBtr0332554|1|1);UTR_5_PRIME(MODIFIER||13||332|CG11030|protein_coding|CODING|FBtr0079135|1|1)]	This gene is referred to in FlyBase by the symbol Dmel\CG11030 (FBgn0031736). It is a protein_coding_gene from Drosophila melanogaster. It has 2 annotated transcripts and 2 polypeptides (1 unique). Gene sequence location is 2L:5724656..5762420. It has the cytological map location 25F3-25F4. Protein features are: Sas10/Utp3/C1D. Its molecular function is unknown. The biological processes in which …
FBtr0332554	2L_5725207_SNP	G	A	0.1081	4	33	5.63e-06	0.138284	SiteClass[FBgn0031736|CG11030|UTR_5_PRIME|0],TranscriptAnnot[UTR_5_PRIME(MODIFIER||13||332|CG11030|protein_coding|CODING|FBtr0332554|1|1);UTR_5_PRIME(MODIFIER||13||332|CG11030|protein_coding|CODING|FBtr0079135|1|1)]	-
FBtr0079135	2L_5725207_SNP	G	A	0.1081	4	33	5.63e-06	0.138284	SiteClass[FBgn0031736|CG11030|UTR_5_PRIME|0],TranscriptAnnot[UTR_5_PRIME(MODIFIER||13||332|CG11030|protein_coding|CODING|FBtr0332554|1|1);UTR_5_PRIME(MODIFIER||13||332|CG11030|protein_coding|CODING|FBtr0079135|1|1)]	-
FBgn0031736	2L_5725239_INS	TTAT	T	0.1081	4	33	5.63e-06	0.138284	SiteClass[FBgn0031736|CG11030|INTRON|0],TranscriptAnnot[INTRON(MODIFIER||||332|CG11030|protein_coding|CODING|FBtr0079135|1|1);INTRON(MODIFIER||||332|CG11030|protein_coding|CODING|FBtr0332554|1|1)]	This gene is referred to in FlyBase by the symbol Dmel\CG11030 (FBgn0031736). It is a protein_coding_gene from Drosophila melanogaster. It has 2 annotated transcripts and 2 polypeptides (1 unique). Gene sequence location is 2L:5724656..5762420. It has the cytological map location 25F3-25F4. Protein features are: Sas10/Utp3/C1D. Its molecular function is unknown. The biological processes in which …
FBtr0079135	2L_5725239_INS	TTAT	T	0.1081	4	33	5.63e-06	0.138284	SiteClass[FBgn0031736|CG11030|INTRON|0],TranscriptAnnot[INTRON(MODIFIER||||332|CG11030|protein_coding|CODING|FBtr0079135|1|1);INTRON(MODIFIER||||332|CG11030|protein_coding|CODING|FBtr0332554|1|1)]	-
FBtr0332554	2L_5725239_INS	TTAT	T	0.1081	4	33	5.63e-06	0.138284	SiteClass[FBgn0031736|CG11030|INTRON|0],TranscriptAnnot[INTRON(MODIFIER||||332|CG11030|protein_coding|CODING|FBtr0079135|1|1);INTRON(MODIFIER||||332|CG11030|protein_coding|CODING|FBtr0332554|1|1)]	-
FBgn0031736	2L_5725304_DEL	A	ATAACA	0.1081	4	33	5.63e-06	0.138284	SiteClass[FBgn0031736|CG11030|INTRON|0],TranscriptAnnot[INTRON(MODIFIER||||332|CG11030|protein_coding|CODING|FBtr0079135|1|1);INTRON(MODIFIER||||332|CG11030|protein_coding|CODING|FBtr0332554|1|1)]	This gene is referred to in FlyBase by the symbol Dmel\CG11030 (FBgn0031736). It is a protein_coding_gene from Drosophila melanogaster. It has 2 annotated transcripts and 2 polypeptides (1 unique). Gene sequence location is 2L:5724656..5762420. It has the cytological map location 25F3-25F4. Protein features are: Sas10/Utp3/C1D. Its molecular function is unknown. The biological processes in which …
FBtr0079135	2L_5725304_DEL	A	ATAACA	0.1081	4	33	5.63e-06	0.138284	SiteClass[FBgn0031736|CG11030|INTRON|0],TranscriptAnnot[INTRON(MODIFIER||||332|CG11030|protein_coding|CODING|FBtr0079135|1|1);INTRON(MODIFIER||||332|CG11030|protein_coding|CODING|FBtr0332554|1|1)]	-
FBtr0332554	2L_5725304_DEL	A	ATAACA	0.1081	4	33	5.63e-06	0.138284	SiteClass[FBgn0031736|CG11030|INTRON|0],TranscriptAnnot[INTRON(MODIFIER||||332|CG11030|protein_coding|CODING|FBtr0079135|1|1);INTRON(MODIFIER||||332|CG11030|protein_coding|CODING|FBtr0332554|1|1)]	-
FBgn0031736	2L_5725387_SNP	T	G	0.1081	4	33	5.63e-06	0.138284	SiteClass[FBgn0031736|CG11030|INTRON|0],TranscriptAnnot[INTRON(MODIFIER||||332|CG11030|protein_coding|CODING|FBtr0079135|1|1);INTRON(MODIFIER||||332|CG11030|protein_coding|CODING|FBtr0332554|1|1)]	This gene is referred to in FlyBase by the symbol Dmel\CG11030 (FBgn0031736). It is a protein_coding_gene from Drosophila melanogaster. It has 2 annotated transcripts and 2 polypeptides (1 unique). Gene sequence location is 2L:5724656..5762420. It has the cytological map location 25F3-25F4. Protein features are: Sas10/Utp3/C1D. Its molecular function is unknown. The biological processes in which …
FBtr0079135	2L_5725387_SNP	T	G	0.1081	4	33	5.63e-06	0.138284	SiteClass[FBgn0031736|CG11030|INTRON|0],TranscriptAnnot[INTRON(MODIFIER||||332|CG11030|protein_coding|CODING|FBtr0079135|1|1);INTRON(MODIFIER||||332|CG11030|protein_coding|CODING|FBtr0332554|1|1)]	-
FBtr0332554	2L_5725387_SNP	T	G	0.1081	4	33	5.63e-06	0.138284	SiteClass[FBgn0031736|CG11030|INTRON|0],TranscriptAnnot[INTRON(MODIFIER||||332|CG11030|protein_coding|CODING|FBtr0079135|1|1);INTRON(MODIFIER||||332|CG11030|protein_coding|CODING|FBtr0332554|1|1)]	-
FBgn0031736	2L_5725433_SNP	G	T	0.1081	4	33	5.63e-06	0.138284	SiteClass[FBgn0031736|CG11030|INTRON|0;FBgn0031733|CG14006|DOWNSTREAM|982],TranscriptAnnot[DOWNSTREAM(MODIFIER||982||429|CG14006|protein_coding|CODING|FBtr0332555||1);INTRON(MODIFIER||||332|CG11030|protein_coding|CODING|FBtr0079135|1|1);INTRON(MODIFIER||||332|CG11030|protein_coding|CODING|FBtr0332554|1|1)]	This gene is referred to in FlyBase by the symbol Dmel\CG11030 (FBgn0031736). It is a protein_coding_gene from Drosophila melanogaster. It has 2 annotated transcripts and 2 polypeptides (1 unique). Gene sequence location is 2L:5724656..5762420. It has the cytological map location 25F3-25F4. Protein features are: Sas10/Utp3/C1D. Its molecular function is unknown. The biological processes in which …
FBgn0031733	2L_5725433_SNP	G	T	0.1081	4	33	5.63e-06	0.138284	SiteClass[FBgn0031736|CG11030|INTRON|0;FBgn0031733|CG14006|DOWNSTREAM|982],TranscriptAnnot[DOWNSTREAM(MODIFIER||982||429|CG14006|protein_coding|CODING|FBtr0332555||1);INTRON(MODIFIER||||332|CG11030|protein_coding|CODING|FBtr0079135|1|1);INTRON(MODIFIER||||332|CG11030|protein_coding|CODING|FBtr0332554|1|1)]	This gene is referred to in FlyBase by the symbol Dmel\CG14006 (FBgn0031733). It is a protein_coding_gene from Drosophila melanogaster. It has 2 annotated transcripts and 2 polypeptides (1 unique). Gene sequence location is 2L:5726415..5728811. It has the cytological map location 25F4. Protein features are: Adenosine kinase; Carbohydrate kinase PfkB; NEMP family; Ribokinase-like. Its molecular fu…
FBtr0332555	2L_5725433_SNP	G	T	0.1081	4	33	5.63e-06	0.138284	SiteClass[FBgn0031736|CG11030|INTRON|0;FBgn0031733|CG14006|DOWNSTREAM|982],TranscriptAnnot[DOWNSTREAM(MODIFIER||982||429|CG14006|protein_coding|CODING|FBtr0332555||1);INTRON(MODIFIER||||332|CG11030|protein_coding|CODING|FBtr0079135|1|1);INTRON(MODIFIER||||332|CG11030|protein_coding|CODING|FBtr0332554|1|1)]	-
FBtr0079135	2L_5725433_SNP	G	T	0.1081	4	33	5.63e-06	0.138284	SiteClass[FBgn0031736|CG11030|INTRON|0;FBgn0031733|CG14006|DOWNSTREAM|982],TranscriptAnnot[DOWNSTREAM(MODIFIER||982||429|CG14006|protein_coding|CODING|FBtr0332555||1);INTRON(MODIFIER||||332|CG11030|protein_coding|CODING|FBtr0079135|1|1);INTRON(MODIFIER||||332|CG11030|protein_coding|CODING|FBtr0332554|1|1)]	-
FBtr0332554	2L_5725433_SNP	G	T	0.1081	4	33	5.63e-06	0.138284	SiteClass[FBgn0031736|CG11030|INTRON|0;FBgn0031733|CG14006|DOWNSTREAM|982],TranscriptAnnot[DOWNSTREAM(MODIFIER||982||429|CG14006|protein_coding|CODING|FBtr0332555||1);INTRON(MODIFIER||||332|CG11030|protein_coding|CODING|FBtr0079135|1|1);INTRON(MODIFIER||||332|CG11030|protein_coding|CODING|FBtr0332554|1|1)]	-
FBgn0031736	2L_5725455_SNP	G	T	0.1081	4	33	5.63e-06	0.138284	SiteClass[FBgn0031736|CG11030|INTRON|0;FBgn0031733|CG14006|DOWNSTREAM|960],TranscriptAnnot[DOWNSTREAM(MODIFIER||960||429|CG14006|protein_coding|CODING|FBtr0332555||1);INTRON(MODIFIER||||332|CG11030|protein_coding|CODING|FBtr0079135|1|1);INTRON(MODIFIER||||332|CG11030|protein_coding|CODING|FBtr0332554|1|1)]	This gene is referred to in FlyBase by the symbol Dmel\CG11030 (FBgn0031736). It is a protein_coding_gene from Drosophila melanogaster. It has 2 annotated transcripts and 2 polypeptides (1 unique). Gene sequence location is 2L:5724656..5762420. It has the cytological map location 25F3-25F4. Protein features are: Sas10/Utp3/C1D. Its molecular function is unknown. The biological processes in which …
FBgn0031733	2L_5725455_SNP	G	T	0.1081	4	33	5.63e-06	0.138284	SiteClass[FBgn0031736|CG11030|INTRON|0;FBgn0031733|CG14006|DOWNSTREAM|960],TranscriptAnnot[DOWNSTREAM(MODIFIER||960||429|CG14006|protein_coding|CODING|FBtr0332555||1);INTRON(MODIFIER||||332|CG11030|protein_coding|CODING|FBtr0079135|1|1);INTRON(MODIFIER||||332|CG11030|protein_coding|CODING|FBtr0332554|1|1)]	This gene is referred to in FlyBase by the symbol Dmel\CG14006 (FBgn0031733). It is a protein_coding_gene from Drosophila melanogaster. It has 2 annotated transcripts and 2 polypeptides (1 unique). Gene sequence location is 2L:5726415..5728811. It has the cytological map location 25F4. Protein features are: Adenosine kinase; Carbohydrate kinase PfkB; NEMP family; Ribokinase-like. Its molecular fu…
FBtr0332555	2L_5725455_SNP	G	T	0.1081	4	33	5.63e-06	0.138284	SiteClass[FBgn0031736|CG11030|INTRON|0;FBgn0031733|CG14006|DOWNSTREAM|960],TranscriptAnnot[DOWNSTREAM(MODIFIER||960||429|CG14006|protein_coding|CODING|FBtr0332555||1);INTRON(MODIFIER||||332|CG11030|protein_coding|CODING|FBtr0079135|1|1);INTRON(MODIFIER||||332|CG11030|protein_coding|CODING|FBtr0332554|1|1)]	-
FBtr0079135	2L_5725455_SNP	G	T	0.1081	4	33	5.63e-06	0.138284	SiteClass[FBgn0031736|CG11030|INTRON|0;FBgn0031733|CG14006|DOWNSTREAM|960],TranscriptAnnot[DOWNSTREAM(MODIFIER||960||429|CG14006|protein_coding|CODING|FBtr0332555||1);INTRON(MODIFIER||||332|CG11030|protein_coding|CODING|FBtr0079135|1|1);INTRON(MODIFIER||||332|CG11030|protein_coding|CODING|FBtr0332554|1|1)]	-
FBtr0332554	2L_5725455_SNP	G	T	0.1081	4	33	5.63e-06	0.138284	SiteClass[FBgn0031736|CG11030|INTRON|0;FBgn0031733|CG14006|DOWNSTREAM|960],TranscriptAnnot[DOWNSTREAM(MODIFIER||960||429|CG14006|protein_coding|CODING|FBtr0332555||1);INTRON(MODIFIER||||332|CG11030|protein_coding|CODING|FBtr0079135|1|1);INTRON(MODIFIER||||332|CG11030|protein_coding|CODING|FBtr0332554|1|1)]	-
FBgn0031736	2L_5725457_SNP	C	A	0.1081	4	33	5.63e-06	0.138284	SiteClass[FBgn0031736|CG11030|INTRON|0;FBgn0031733|CG14006|DOWNSTREAM|958],TranscriptAnnot[DOWNSTREAM(MODIFIER||958||429|CG14006|protein_coding|CODING|FBtr0332555||1);INTRON(MODIFIER||||332|CG11030|protein_coding|CODING|FBtr0079135|1|1);INTRON(MODIFIER||||332|CG11030|protein_coding|CODING|FBtr0332554|1|1)]	This gene is referred to in FlyBase by the symbol Dmel\CG11030 (FBgn0031736). It is a protein_coding_gene from Drosophila melanogaster. It has 2 annotated transcripts and 2 polypeptides (1 unique). Gene sequence location is 2L:5724656..5762420. It has the cytological map location 25F3-25F4. Protein features are: Sas10/Utp3/C1D. Its molecular function is unknown. The biological processes in which …
FBgn0031733	2L_5725457_SNP	C	A	0.1081	4	33	5.63e-06	0.138284	SiteClass[FBgn0031736|CG11030|INTRON|0;FBgn0031733|CG14006|DOWNSTREAM|958],TranscriptAnnot[DOWNSTREAM(MODIFIER||958||429|CG14006|protein_coding|CODING|FBtr0332555||1);INTRON(MODIFIER||||332|CG11030|protein_coding|CODING|FBtr0079135|1|1);INTRON(MODIFIER||||332|CG11030|protein_coding|CODING|FBtr0332554|1|1)]	This gene is referred to in FlyBase by the symbol Dmel\CG14006 (FBgn0031733). It is a protein_coding_gene from Drosophila melanogaster. It has 2 annotated transcripts and 2 polypeptides (1 unique). Gene sequence location is 2L:5726415..5728811. It has the cytological map location 25F4. Protein features are: Adenosine kinase; Carbohydrate kinase PfkB; NEMP family; Ribokinase-like. Its molecular fu…
FBtr0332555	2L_5725457_SNP	C	A	0.1081	4	33	5.63e-06	0.138284	SiteClass[FBgn0031736|CG11030|INTRON|0;FBgn0031733|CG14006|DOWNSTREAM|958],TranscriptAnnot[DOWNSTREAM(MODIFIER||958||429|CG14006|protein_coding|CODING|FBtr0332555||1);INTRON(MODIFIER||||332|CG11030|protein_coding|CODING|FBtr0079135|1|1);INTRON(MODIFIER||||332|CG11030|protein_coding|CODING|FBtr0332554|1|1)]	-
FBtr0079135	2L_5725457_SNP	C	A	0.1081	4	33	5.63e-06	0.138284	SiteClass[FBgn0031736|CG11030|INTRON|0;FBgn0031733|CG14006|DOWNSTREAM|958],TranscriptAnnot[DOWNSTREAM(MODIFIER||958||429|CG14006|protein_coding|CODING|FBtr0332555||1);INTRON(MODIFIER||||332|CG11030|protein_coding|CODING|FBtr0079135|1|1);INTRON(MODIFIER||||332|CG11030|protein_coding|CODING|FBtr0332554|1|1)]	-
FBtr0332554	2L_5725457_SNP	C	A	0.1081	4	33	5.63e-06	0.138284	SiteClass[FBgn0031736|CG11030|INTRON|0;FBgn0031733|CG14006|DOWNSTREAM|958],TranscriptAnnot[DOWNSTREAM(MODIFIER||958||429|CG14006|protein_coding|CODING|FBtr0332555||1);INTRON(MODIFIER||||332|CG11030|protein_coding|CODING|FBtr0079135|1|1);INTRON(MODIFIER||||332|CG11030|protein_coding|CODING|FBtr0332554|1|1)]	-
FBgn0031736	2L_5725459_SNP	T	A	0.1081	4	33	5.63e-06	0.138284	SiteClass[FBgn0031736|CG11030|INTRON|0;FBgn0031733|CG14006|DOWNSTREAM|956],TranscriptAnnot[DOWNSTREAM(MODIFIER||956||429|CG14006|protein_coding|CODING|FBtr0332555||1);INTRON(MODIFIER||||332|CG11030|protein_coding|CODING|FBtr0079135|1|1);INTRON(MODIFIER||||332|CG11030|protein_coding|CODING|FBtr0332554|1|1)]	This gene is referred to in FlyBase by the symbol Dmel\CG11030 (FBgn0031736). It is a protein_coding_gene from Drosophila melanogaster. It has 2 annotated transcripts and 2 polypeptides (1 unique). Gene sequence location is 2L:5724656..5762420. It has the cytological map location 25F3-25F4. Protein features are: Sas10/Utp3/C1D. Its molecular function is unknown. The biological processes in which …
FBgn0031733	2L_5725459_SNP	T	A	0.1081	4	33	5.63e-06	0.138284	SiteClass[FBgn0031736|CG11030|INTRON|0;FBgn0031733|CG14006|DOWNSTREAM|956],TranscriptAnnot[DOWNSTREAM(MODIFIER||956||429|CG14006|protein_coding|CODING|FBtr0332555||1);INTRON(MODIFIER||||332|CG11030|protein_coding|CODING|FBtr0079135|1|1);INTRON(MODIFIER||||332|CG11030|protein_coding|CODING|FBtr0332554|1|1)]	This gene is referred to in FlyBase by the symbol Dmel\CG14006 (FBgn0031733). It is a protein_coding_gene from Drosophila melanogaster. It has 2 annotated transcripts and 2 polypeptides (1 unique). Gene sequence location is 2L:5726415..5728811. It has the cytological map location 25F4. Protein features are: Adenosine kinase; Carbohydrate kinase PfkB; NEMP family; Ribokinase-like. Its molecular fu…
FBtr0332555	2L_5725459_SNP	T	A	0.1081	4	33	5.63e-06	0.138284	SiteClass[FBgn0031736|CG11030|INTRON|0;FBgn0031733|CG14006|DOWNSTREAM|956],TranscriptAnnot[DOWNSTREAM(MODIFIER||956||429|CG14006|protein_coding|CODING|FBtr0332555||1);INTRON(MODIFIER||||332|CG11030|protein_coding|CODING|FBtr0079135|1|1);INTRON(MODIFIER||||332|CG11030|protein_coding|CODING|FBtr0332554|1|1)]	-
FBtr0079135	2L_5725459_SNP	T	A	0.1081	4	33	5.63e-06	0.138284	SiteClass[FBgn0031736|CG11030|INTRON|0;FBgn0031733|CG14006|DOWNSTREAM|956],TranscriptAnnot[DOWNSTREAM(MODIFIER||956||429|CG14006|protein_coding|CODING|FBtr0332555||1);INTRON(MODIFIER||||332|CG11030|protein_coding|CODING|FBtr0079135|1|1);INTRON(MODIFIER||||332|CG11030|protein_coding|CODING|FBtr0332554|1|1)]	-
FBtr0332554	2L_5725459_SNP	T	A	0.1081	4	33	5.63e-06	0.138284	SiteClass[FBgn0031736|CG11030|INTRON|0;FBgn0031733|CG14006|DOWNSTREAM|956],TranscriptAnnot[DOWNSTREAM(MODIFIER||956||429|CG14006|protein_coding|CODING|FBtr0332555||1);INTRON(MODIFIER||||332|CG11030|protein_coding|CODING|FBtr0079135|1|1);INTRON(MODIFIER||||332|CG11030|protein_coding|CODING|FBtr0332554|1|1)]	-
FBgn0031736	2L_5725460_SNP	C	A	0.1081	4	33	5.63e-06	0.138284	SiteClass[FBgn0031736|CG11030|INTRON|0;FBgn0031733|CG14006|DOWNSTREAM|955],TranscriptAnnot[DOWNSTREAM(MODIFIER||955||429|CG14006|protein_coding|CODING|FBtr0332555||1);INTRON(MODIFIER||||332|CG11030|protein_coding|CODING|FBtr0079135|1|1);INTRON(MODIFIER||||332|CG11030|protein_coding|CODING|FBtr0332554|1|1)]	This gene is referred to in FlyBase by the symbol Dmel\CG11030 (FBgn0031736). It is a protein_coding_gene from Drosophila melanogaster. It has 2 annotated transcripts and 2 polypeptides (1 unique). Gene sequence location is 2L:5724656..5762420. It has the cytological map location 25F3-25F4. Protein features are: Sas10/Utp3/C1D. Its molecular function is unknown. The biological processes in which …
FBgn0031733	2L_5725460_SNP	C	A	0.1081	4	33	5.63e-06	0.138284	SiteClass[FBgn0031736|CG11030|INTRON|0;FBgn0031733|CG14006|DOWNSTREAM|955],TranscriptAnnot[DOWNSTREAM(MODIFIER||955||429|CG14006|protein_coding|CODING|FBtr0332555||1);INTRON(MODIFIER||||332|CG11030|protein_coding|CODING|FBtr0079135|1|1);INTRON(MODIFIER||||332|CG11030|protein_coding|CODING|FBtr0332554|1|1)]	This gene is referred to in FlyBase by the symbol Dmel\CG14006 (FBgn0031733). It is a protein_coding_gene from Drosophila melanogaster. It has 2 annotated transcripts and 2 polypeptides (1 unique). Gene sequence location is 2L:5726415..5728811. It has the cytological map location 25F4. Protein features are: Adenosine kinase; Carbohydrate kinase PfkB; NEMP family; Ribokinase-like. Its molecular fu…
FBtr0332555	2L_5725460_SNP	C	A	0.1081	4	33	5.63e-06	0.138284	SiteClass[FBgn0031736|CG11030|INTRON|0;FBgn0031733|CG14006|DOWNSTREAM|955],TranscriptAnnot[DOWNSTREAM(MODIFIER||955||429|CG14006|protein_coding|CODING|FBtr0332555||1);INTRON(MODIFIER||||332|CG11030|protein_coding|CODING|FBtr0079135|1|1);INTRON(MODIFIER||||332|CG11030|protein_coding|CODING|FBtr0332554|1|1)]	-
FBtr0079135	2L_5725460_SNP	C	A	0.1081	4	33	5.63e-06	0.138284	SiteClass[FBgn0031736|CG11030|INTRON|0;FBgn0031733|CG14006|DOWNSTREAM|955],TranscriptAnnot[DOWNSTREAM(MODIFIER||955||429|CG14006|protein_coding|CODING|FBtr0332555||1);INTRON(MODIFIER||||332|CG11030|protein_coding|CODING|FBtr0079135|1|1);INTRON(MODIFIER||||332|CG11030|protein_coding|CODING|FBtr0332554|1|1)]	-
FBtr0332554	2L_5725460_SNP	C	A	0.1081	4	33	5.63e-06	0.138284	SiteClass[FBgn0031736|CG11030|INTRON|0;FBgn0031733|CG14006|DOWNSTREAM|955],TranscriptAnnot[DOWNSTREAM(MODIFIER||955||429|CG14006|protein_coding|CODING|FBtr0332555||1);INTRON(MODIFIER||||332|CG11030|protein_coding|CODING|FBtr0079135|1|1);INTRON(MODIFIER||||332|CG11030|protein_coding|CODING|FBtr0332554|1|1)]	-
FBgn0031736	2L_5725469_SNP	A	G	0.1081	4	33	5.63e-06	0.138284	SiteClass[FBgn0031736|CG11030|INTRON|0;FBgn0031733|CG14006|DOWNSTREAM|946],TranscriptAnnot[DOWNSTREAM(MODIFIER||946||429|CG14006|protein_coding|CODING|FBtr0332555||1);INTRON(MODIFIER||||332|CG11030|protein_coding|CODING|FBtr0079135|1|1);INTRON(MODIFIER||||332|CG11030|protein_coding|CODING|FBtr0332554|1|1)]	This gene is referred to in FlyBase by the symbol Dmel\CG11030 (FBgn0031736). It is a protein_coding_gene from Drosophila melanogaster. It has 2 annotated transcripts and 2 polypeptides (1 unique). Gene sequence location is 2L:5724656..5762420. It has the cytological map location 25F3-25F4. Protein features are: Sas10/Utp3/C1D. Its molecular function is unknown. The biological processes in which …
FBgn0031733	2L_5725469_SNP	A	G	0.1081	4	33	5.63e-06	0.138284	SiteClass[FBgn0031736|CG11030|INTRON|0;FBgn0031733|CG14006|DOWNSTREAM|946],TranscriptAnnot[DOWNSTREAM(MODIFIER||946||429|CG14006|protein_coding|CODING|FBtr0332555||1);INTRON(MODIFIER||||332|CG11030|protein_coding|CODING|FBtr0079135|1|1);INTRON(MODIFIER||||332|CG11030|protein_coding|CODING|FBtr0332554|1|1)]	This gene is referred to in FlyBase by the symbol Dmel\CG14006 (FBgn0031733). It is a protein_coding_gene from Drosophila melanogaster. It has 2 annotated transcripts and 2 polypeptides (1 unique). Gene sequence location is 2L:5726415..5728811. It has the cytological map location 25F4. Protein features are: Adenosine kinase; Carbohydrate kinase PfkB; NEMP family; Ribokinase-like. Its molecular fu…
FBtr0332555	2L_5725469_SNP	A	G	0.1081	4	33	5.63e-06	0.138284	SiteClass[FBgn0031736|CG11030|INTRON|0;FBgn0031733|CG14006|DOWNSTREAM|946],TranscriptAnnot[DOWNSTREAM(MODIFIER||946||429|CG14006|protein_coding|CODING|FBtr0332555||1);INTRON(MODIFIER||||332|CG11030|protein_coding|CODING|FBtr0079135|1|1);INTRON(MODIFIER||||332|CG11030|protein_coding|CODING|FBtr0332554|1|1)]	-
FBtr0079135	2L_5725469_SNP	A	G	0.1081	4	33	5.63e-06	0.138284	SiteClass[FBgn0031736|CG11030|INTRON|0;FBgn0031733|CG14006|DOWNSTREAM|946],TranscriptAnnot[DOWNSTREAM(MODIFIER||946||429|CG14006|protein_coding|CODING|FBtr0332555||1);INTRON(MODIFIER||||332|CG11030|protein_coding|CODING|FBtr0079135|1|1);INTRON(MODIFIER||||332|CG11030|protein_coding|CODING|FBtr0332554|1|1)]	-
FBtr0332554	2L_5725469_SNP	A	G	0.1081	4	33	5.63e-06	0.138284	SiteClass[FBgn0031736|CG11030|INTRON|0;FBgn0031733|CG14006|DOWNSTREAM|946],TranscriptAnnot[DOWNSTREAM(MODIFIER||946||429|CG14006|protein_coding|CODING|FBtr0332555||1);INTRON(MODIFIER||||332|CG11030|protein_coding|CODING|FBtr0079135|1|1);INTRON(MODIFIER||||332|CG11030|protein_coding|CODING|FBtr0332554|1|1)]	-
FBgn0031736	2L_5725480_SNP	T	A	0.1081	4	33	5.63e-06	0.138284	SiteClass[FBgn0031736|CG11030|INTRON|0;FBgn0031733|CG14006|DOWNSTREAM|935],TranscriptAnnot[DOWNSTREAM(MODIFIER||935||429|CG14006|protein_coding|CODING|FBtr0332555||1);INTRON(MODIFIER||||332|CG11030|protein_coding|CODING|FBtr0079135|1|1);INTRON(MODIFIER||||332|CG11030|protein_coding|CODING|FBtr0332554|1|1)]	This gene is referred to in FlyBase by the symbol Dmel\CG11030 (FBgn0031736). It is a protein_coding_gene from Drosophila melanogaster. It has 2 annotated transcripts and 2 polypeptides (1 unique). Gene sequence location is 2L:5724656..5762420. It has the cytological map location 25F3-25F4. Protein features are: Sas10/Utp3/C1D. Its molecular function is unknown. The biological processes in which …
FBgn0031733	2L_5725480_SNP	T	A	0.1081	4	33	5.63e-06	0.138284	SiteClass[FBgn0031736|CG11030|INTRON|0;FBgn0031733|CG14006|DOWNSTREAM|935],TranscriptAnnot[DOWNSTREAM(MODIFIER||935||429|CG14006|protein_coding|CODING|FBtr0332555||1);INTRON(MODIFIER||||332|CG11030|protein_coding|CODING|FBtr0079135|1|1);INTRON(MODIFIER||||332|CG11030|protein_coding|CODING|FBtr0332554|1|1)]	This gene is referred to in FlyBase by the symbol Dmel\CG14006 (FBgn0031733). It is a protein_coding_gene from Drosophila melanogaster. It has 2 annotated transcripts and 2 polypeptides (1 unique). Gene sequence location is 2L:5726415..5728811. It has the cytological map location 25F4. Protein features are: Adenosine kinase; Carbohydrate kinase PfkB; NEMP family; Ribokinase-like. Its molecular fu…
FBtr0332555	2L_5725480_SNP	T	A	0.1081	4	33	5.63e-06	0.138284	SiteClass[FBgn0031736|CG11030|INTRON|0;FBgn0031733|CG14006|DOWNSTREAM|935],TranscriptAnnot[DOWNSTREAM(MODIFIER||935||429|CG14006|protein_coding|CODING|FBtr0332555||1);INTRON(MODIFIER||||332|CG11030|protein_coding|CODING|FBtr0079135|1|1);INTRON(MODIFIER||||332|CG11030|protein_coding|CODING|FBtr0332554|1|1)]	-
FBtr0079135	2L_5725480_SNP	T	A	0.1081	4	33	5.63e-06	0.138284	SiteClass[FBgn0031736|CG11030|INTRON|0;FBgn0031733|CG14006|DOWNSTREAM|935],TranscriptAnnot[DOWNSTREAM(MODIFIER||935||429|CG14006|protein_coding|CODING|FBtr0332555||1);INTRON(MODIFIER||||332|CG11030|protein_coding|CODING|FBtr0079135|1|1);INTRON(MODIFIER||||332|CG11030|protein_coding|CODING|FBtr0332554|1|1)]	-
FBtr0332554	2L_5725480_SNP	T	A	0.1081	4	33	5.63e-06	0.138284	SiteClass[FBgn0031736|CG11030|INTRON|0;FBgn0031733|CG14006|DOWNSTREAM|935],TranscriptAnnot[DOWNSTREAM(MODIFIER||935||429|CG14006|protein_coding|CODING|FBtr0332555||1);INTRON(MODIFIER||||332|CG11030|protein_coding|CODING|FBtr0079135|1|1);INTRON(MODIFIER||||332|CG11030|protein_coding|CODING|FBtr0332554|1|1)]	-
FBgn0031736	2L_5725497_SNP	A	C	0.1081	4	33	5.63e-06	0.138284	SiteClass[FBgn0031736|CG11030|INTRON|0;FBgn0031733|CG14006|DOWNSTREAM|918],TranscriptAnnot[DOWNSTREAM(MODIFIER||918||429|CG14006|protein_coding|CODING|FBtr0332555||1);INTRON(MODIFIER||||332|CG11030|protein_coding|CODING|FBtr0079135|1|1);INTRON(MODIFIER||||332|CG11030|protein_coding|CODING|FBtr0332554|1|1)]	This gene is referred to in FlyBase by the symbol Dmel\CG11030 (FBgn0031736). It is a protein_coding_gene from Drosophila melanogaster. It has 2 annotated transcripts and 2 polypeptides (1 unique). Gene sequence location is 2L:5724656..5762420. It has the cytological map location 25F3-25F4. Protein features are: Sas10/Utp3/C1D. Its molecular function is unknown. The biological processes in which …
FBgn0031733	2L_5725497_SNP	A	C	0.1081	4	33	5.63e-06	0.138284	SiteClass[FBgn0031736|CG11030|INTRON|0;FBgn0031733|CG14006|DOWNSTREAM|918],TranscriptAnnot[DOWNSTREAM(MODIFIER||918||429|CG14006|protein_coding|CODING|FBtr0332555||1);INTRON(MODIFIER||||332|CG11030|protein_coding|CODING|FBtr0079135|1|1);INTRON(MODIFIER||||332|CG11030|protein_coding|CODING|FBtr0332554|1|1)]	This gene is referred to in FlyBase by the symbol Dmel\CG14006 (FBgn0031733). It is a protein_coding_gene from Drosophila melanogaster. It has 2 annotated transcripts and 2 polypeptides (1 unique). Gene sequence location is 2L:5726415..5728811. It has the cytological map location 25F4. Protein features are: Adenosine kinase; Carbohydrate kinase PfkB; NEMP family; Ribokinase-like. Its molecular fu…
FBtr0332555	2L_5725497_SNP	A	C	0.1081	4	33	5.63e-06	0.138284	SiteClass[FBgn0031736|CG11030|INTRON|0;FBgn0031733|CG14006|DOWNSTREAM|918],TranscriptAnnot[DOWNSTREAM(MODIFIER||918||429|CG14006|protein_coding|CODING|FBtr0332555||1);INTRON(MODIFIER||||332|CG11030|protein_coding|CODING|FBtr0079135|1|1);INTRON(MODIFIER||||332|CG11030|protein_coding|CODING|FBtr0332554|1|1)]	-
FBtr0079135	2L_5725497_SNP	A	C	0.1081	4	33	5.63e-06	0.138284	SiteClass[FBgn0031736|CG11030|INTRON|0;FBgn0031733|CG14006|DOWNSTREAM|918],TranscriptAnnot[DOWNSTREAM(MODIFIER||918||429|CG14006|protein_coding|CODING|FBtr0332555||1);INTRON(MODIFIER||||332|CG11030|protein_coding|CODING|FBtr0079135|1|1);INTRON(MODIFIER||||332|CG11030|protein_coding|CODING|FBtr0332554|1|1)]	-
FBtr0332554	2L_5725497_SNP	A	C	0.1081	4	33	5.63e-06	0.138284	SiteClass[FBgn0031736|CG11030|INTRON|0;FBgn0031733|CG14006|DOWNSTREAM|918],TranscriptAnnot[DOWNSTREAM(MODIFIER||918||429|CG14006|protein_coding|CODING|FBtr0332555||1);INTRON(MODIFIER||||332|CG11030|protein_coding|CODING|FBtr0079135|1|1);INTRON(MODIFIER||||332|CG11030|protein_coding|CODING|FBtr0332554|1|1)]	-
FBgn0031736	2L_5725506_SNP	T	A	0.1081	4	33	5.63e-06	0.138284	SiteClass[FBgn0031736|CG11030|INTRON|0;FBgn0031733|CG14006|DOWNSTREAM|909],TranscriptAnnot[DOWNSTREAM(MODIFIER||909||429|CG14006|protein_coding|CODING|FBtr0332555||1);INTRON(MODIFIER||||332|CG11030|protein_coding|CODING|FBtr0079135|1|1);INTRON(MODIFIER||||332|CG11030|protein_coding|CODING|FBtr0332554|1|1)]	This gene is referred to in FlyBase by the symbol Dmel\CG11030 (FBgn0031736). It is a protein_coding_gene from Drosophila melanogaster. It has 2 annotated transcripts and 2 polypeptides (1 unique). Gene sequence location is 2L:5724656..5762420. It has the cytological map location 25F3-25F4. Protein features are: Sas10/Utp3/C1D. Its molecular function is unknown. The biological processes in which …
FBgn0031733	2L_5725506_SNP	T	A	0.1081	4	33	5.63e-06	0.138284	SiteClass[FBgn0031736|CG11030|INTRON|0;FBgn0031733|CG14006|DOWNSTREAM|909],TranscriptAnnot[DOWNSTREAM(MODIFIER||909||429|CG14006|protein_coding|CODING|FBtr0332555||1);INTRON(MODIFIER||||332|CG11030|protein_coding|CODING|FBtr0079135|1|1);INTRON(MODIFIER||||332|CG11030|protein_coding|CODING|FBtr0332554|1|1)]	This gene is referred to in FlyBase by the symbol Dmel\CG14006 (FBgn0031733). It is a protein_coding_gene from Drosophila melanogaster. It has 2 annotated transcripts and 2 polypeptides (1 unique). Gene sequence location is 2L:5726415..5728811. It has the cytological map location 25F4. Protein features are: Adenosine kinase; Carbohydrate kinase PfkB; NEMP family; Ribokinase-like. Its molecular fu…
FBtr0332555	2L_5725506_SNP	T	A	0.1081	4	33	5.63e-06	0.138284	SiteClass[FBgn0031736|CG11030|INTRON|0;FBgn0031733|CG14006|DOWNSTREAM|909],TranscriptAnnot[DOWNSTREAM(MODIFIER||909||429|CG14006|protein_coding|CODING|FBtr0332555||1);INTRON(MODIFIER||||332|CG11030|protein_coding|CODING|FBtr0079135|1|1);INTRON(MODIFIER||||332|CG11030|protein_coding|CODING|FBtr0332554|1|1)]	-
FBtr0079135	2L_5725506_SNP	T	A	0.1081	4	33	5.63e-06	0.138284	SiteClass[FBgn0031736|CG11030|INTRON|0;FBgn0031733|CG14006|DOWNSTREAM|909],TranscriptAnnot[DOWNSTREAM(MODIFIER||909||429|CG14006|protein_coding|CODING|FBtr0332555||1);INTRON(MODIFIER||||332|CG11030|protein_coding|CODING|FBtr0079135|1|1);INTRON(MODIFIER||||332|CG11030|protein_coding|CODING|FBtr0332554|1|1)]	-
FBtr0332554	2L_5725506_SNP	T	A	0.1081	4	33	5.63e-06	0.138284	SiteClass[FBgn0031736|CG11030|INTRON|0;FBgn0031733|CG14006|DOWNSTREAM|909],TranscriptAnnot[DOWNSTREAM(MODIFIER||909||429|CG14006|protein_coding|CODING|FBtr0332555||1);INTRON(MODIFIER||||332|CG11030|protein_coding|CODING|FBtr0079135|1|1);INTRON(MODIFIER||||332|CG11030|protein_coding|CODING|FBtr0332554|1|1)]	-
FBgn0031736	2L_5725521_SNP	G	A	0.1081	4	33	5.63e-06	0.138284	SiteClass[FBgn0031736|CG11030|INTRON|0;FBgn0031733|CG14006|DOWNSTREAM|894],TranscriptAnnot[DOWNSTREAM(MODIFIER||894||429|CG14006|protein_coding|CODING|FBtr0332555||1);INTRON(MODIFIER||||332|CG11030|protein_coding|CODING|FBtr0079135|1|1);INTRON(MODIFIER||||332|CG11030|protein_coding|CODING|FBtr0332554|1|1)]	This gene is referred to in FlyBase by the symbol Dmel\CG11030 (FBgn0031736). It is a protein_coding_gene from Drosophila melanogaster. It has 2 annotated transcripts and 2 polypeptides (1 unique). Gene sequence location is 2L:5724656..5762420. It has the cytological map location 25F3-25F4. Protein features are: Sas10/Utp3/C1D. Its molecular function is unknown. The biological processes in which …
FBgn0031733	2L_5725521_SNP	G	A	0.1081	4	33	5.63e-06	0.138284	SiteClass[FBgn0031736|CG11030|INTRON|0;FBgn0031733|CG14006|DOWNSTREAM|894],TranscriptAnnot[DOWNSTREAM(MODIFIER||894||429|CG14006|protein_coding|CODING|FBtr0332555||1);INTRON(MODIFIER||||332|CG11030|protein_coding|CODING|FBtr0079135|1|1);INTRON(MODIFIER||||332|CG11030|protein_coding|CODING|FBtr0332554|1|1)]	This gene is referred to in FlyBase by the symbol Dmel\CG14006 (FBgn0031733). It is a protein_coding_gene from Drosophila melanogaster. It has 2 annotated transcripts and 2 polypeptides (1 unique). Gene sequence location is 2L:5726415..5728811. It has the cytological map location 25F4. Protein features are: Adenosine kinase; Carbohydrate kinase PfkB; NEMP family; Ribokinase-like. Its molecular fu…
FBtr0332555	2L_5725521_SNP	G	A	0.1081	4	33	5.63e-06	0.138284	SiteClass[FBgn0031736|CG11030|INTRON|0;FBgn0031733|CG14006|DOWNSTREAM|894],TranscriptAnnot[DOWNSTREAM(MODIFIER||894||429|CG14006|protein_coding|CODING|FBtr0332555||1);INTRON(MODIFIER||||332|CG11030|protein_coding|CODING|FBtr0079135|1|1);INTRON(MODIFIER||||332|CG11030|protein_coding|CODING|FBtr0332554|1|1)]	-
FBtr0079135	2L_5725521_SNP	G	A	0.1081	4	33	5.63e-06	0.138284	SiteClass[FBgn0031736|CG11030|INTRON|0;FBgn0031733|CG14006|DOWNSTREAM|894],TranscriptAnnot[DOWNSTREAM(MODIFIER||894||429|CG14006|protein_coding|CODING|FBtr0332555||1);INTRON(MODIFIER||||332|CG11030|protein_coding|CODING|FBtr0079135|1|1);INTRON(MODIFIER||||332|CG11030|protein_coding|CODING|FBtr0332554|1|1)]	-
FBtr0332554	2L_5725521_SNP	G	A	0.1081	4	33	5.63e-06	0.138284	SiteClass[FBgn0031736|CG11030|INTRON|0;FBgn0031733|CG14006|DOWNSTREAM|894],TranscriptAnnot[DOWNSTREAM(MODIFIER||894||429|CG14006|protein_coding|CODING|FBtr0332555||1);INTRON(MODIFIER||||332|CG11030|protein_coding|CODING|FBtr0079135|1|1);INTRON(MODIFIER||||332|CG11030|protein_coding|CODING|FBtr0332554|1|1)]	-
FBgn0031736	2L_5725522_SNP	T	C	0.1081	4	33	5.63e-06	0.138284	SiteClass[FBgn0031736|CG11030|INTRON|0;FBgn0031733|CG14006|DOWNSTREAM|893],TranscriptAnnot[DOWNSTREAM(MODIFIER||893||429|CG14006|protein_coding|CODING|FBtr0332555||1);INTRON(MODIFIER||||332|CG11030|protein_coding|CODING|FBtr0079135|1|1);INTRON(MODIFIER||||332|CG11030|protein_coding|CODING|FBtr0332554|1|1)]	This gene is referred to in FlyBase by the symbol Dmel\CG11030 (FBgn0031736). It is a protein_coding_gene from Drosophila melanogaster. It has 2 annotated transcripts and 2 polypeptides (1 unique). Gene sequence location is 2L:5724656..5762420. It has the cytological map location 25F3-25F4. Protein features are: Sas10/Utp3/C1D. Its molecular function is unknown. The biological processes in which …
FBgn0031733	2L_5725522_SNP	T	C	0.1081	4	33	5.63e-06	0.138284	SiteClass[FBgn0031736|CG11030|INTRON|0;FBgn0031733|CG14006|DOWNSTREAM|893],TranscriptAnnot[DOWNSTREAM(MODIFIER||893||429|CG14006|protein_coding|CODING|FBtr0332555||1);INTRON(MODIFIER||||332|CG11030|protein_coding|CODING|FBtr0079135|1|1);INTRON(MODIFIER||||332|CG11030|protein_coding|CODING|FBtr0332554|1|1)]	This gene is referred to in FlyBase by the symbol Dmel\CG14006 (FBgn0031733). It is a protein_coding_gene from Drosophila melanogaster. It has 2 annotated transcripts and 2 polypeptides (1 unique). Gene sequence location is 2L:5726415..5728811. It has the cytological map location 25F4. Protein features are: Adenosine kinase; Carbohydrate kinase PfkB; NEMP family; Ribokinase-like. Its molecular fu…
FBtr0332555	2L_5725522_SNP	T	C	0.1081	4	33	5.63e-06	0.138284	SiteClass[FBgn0031736|CG11030|INTRON|0;FBgn0031733|CG14006|DOWNSTREAM|893],TranscriptAnnot[DOWNSTREAM(MODIFIER||893||429|CG14006|protein_coding|CODING|FBtr0332555||1);INTRON(MODIFIER||||332|CG11030|protein_coding|CODING|FBtr0079135|1|1);INTRON(MODIFIER||||332|CG11030|protein_coding|CODING|FBtr0332554|1|1)]	-
FBtr0079135	2L_5725522_SNP	T	C	0.1081	4	33	5.63e-06	0.138284	SiteClass[FBgn0031736|CG11030|INTRON|0;FBgn0031733|CG14006|DOWNSTREAM|893],TranscriptAnnot[DOWNSTREAM(MODIFIER||893||429|CG14006|protein_coding|CODING|FBtr0332555||1);INTRON(MODIFIER||||332|CG11030|protein_coding|CODING|FBtr0079135|1|1);INTRON(MODIFIER||||332|CG11030|protein_coding|CODING|FBtr0332554|1|1)]	-
FBtr0332554	2L_5725522_SNP	T	C	0.1081	4	33	5.63e-06	0.138284	SiteClass[FBgn0031736|CG11030|INTRON|0;FBgn0031733|CG14006|DOWNSTREAM|893],TranscriptAnnot[DOWNSTREAM(MODIFIER||893||429|CG14006|protein_coding|CODING|FBtr0332555||1);INTRON(MODIFIER||||332|CG11030|protein_coding|CODING|FBtr0079135|1|1);INTRON(MODIFIER||||332|CG11030|protein_coding|CODING|FBtr0332554|1|1)]	-
FBgn0031736	2L_5725530_MNP	TAG	ATA	0.1081	4	33	5.63e-06	0.138284	SiteClass[FBgn0031736|CG11030|INTRON|0;FBgn0031733|CG14006|DOWNSTREAM|885],TranscriptAnnot[DOWNSTREAM(MODIFIER||885||429|CG14006|protein_coding|CODING|FBtr0332555||1);INTRON(MODIFIER||||332|CG11030|protein_coding|CODING|FBtr0079135|1|1);INTRON(MODIFIER||||332|CG11030|protein_coding|CODING|FBtr0332554|1|1)]	This gene is referred to in FlyBase by the symbol Dmel\CG11030 (FBgn0031736). It is a protein_coding_gene from Drosophila melanogaster. It has 2 annotated transcripts and 2 polypeptides (1 unique). Gene sequence location is 2L:5724656..5762420. It has the cytological map location 25F3-25F4. Protein features are: Sas10/Utp3/C1D. Its molecular function is unknown. The biological processes in which …
FBgn0031733	2L_5725530_MNP	TAG	ATA	0.1081	4	33	5.63e-06	0.138284	SiteClass[FBgn0031736|CG11030|INTRON|0;FBgn0031733|CG14006|DOWNSTREAM|885],TranscriptAnnot[DOWNSTREAM(MODIFIER||885||429|CG14006|protein_coding|CODING|FBtr0332555||1);INTRON(MODIFIER||||332|CG11030|protein_coding|CODING|FBtr0079135|1|1);INTRON(MODIFIER||||332|CG11030|protein_coding|CODING|FBtr0332554|1|1)]	This gene is referred to in FlyBase by the symbol Dmel\CG14006 (FBgn0031733). It is a protein_coding_gene from Drosophila melanogaster. It has 2 annotated transcripts and 2 polypeptides (1 unique). Gene sequence location is 2L:5726415..5728811. It has the cytological map location 25F4. Protein features are: Adenosine kinase; Carbohydrate kinase PfkB; NEMP family; Ribokinase-like. Its molecular fu…
FBtr0332555	2L_5725530_MNP	TAG	ATA	0.1081	4	33	5.63e-06	0.138284	SiteClass[FBgn0031736|CG11030|INTRON|0;FBgn0031733|CG14006|DOWNSTREAM|885],TranscriptAnnot[DOWNSTREAM(MODIFIER||885||429|CG14006|protein_coding|CODING|FBtr0332555||1);INTRON(MODIFIER||||332|CG11030|protein_coding|CODING|FBtr0079135|1|1);INTRON(MODIFIER||||332|CG11030|protein_coding|CODING|FBtr0332554|1|1)]	-
FBtr0079135	2L_5725530_MNP	TAG	ATA	0.1081	4	33	5.63e-06	0.138284	SiteClass[FBgn0031736|CG11030|INTRON|0;FBgn0031733|CG14006|DOWNSTREAM|885],TranscriptAnnot[DOWNSTREAM(MODIFIER||885||429|CG14006|protein_coding|CODING|FBtr0332555||1);INTRON(MODIFIER||||332|CG11030|protein_coding|CODING|FBtr0079135|1|1);INTRON(MODIFIER||||332|CG11030|protein_coding|CODING|FBtr0332554|1|1)]	-
FBtr0332554	2L_5725530_MNP	TAG	ATA	0.1081	4	33	5.63e-06	0.138284	SiteClass[FBgn0031736|CG11030|INTRON|0;FBgn0031733|CG14006|DOWNSTREAM|885],TranscriptAnnot[DOWNSTREAM(MODIFIER||885||429|CG14006|protein_coding|CODING|FBtr0332555||1);INTRON(MODIFIER||||332|CG11030|protein_coding|CODING|FBtr0079135|1|1);INTRON(MODIFIER||||332|CG11030|protein_coding|CODING|FBtr0332554|1|1)]	-
FBgn0031736	2L_5725558_SNP	A	T	0.1081	4	33	5.63e-06	0.138284	SiteClass[FBgn0031736|CG11030|INTRON|0;FBgn0031733|CG14006|DOWNSTREAM|857],TranscriptAnnot[DOWNSTREAM(MODIFIER||857||429|CG14006|protein_coding|CODING|FBtr0332555||1);INTRON(MODIFIER||||332|CG11030|protein_coding|CODING|FBtr0079135|1|1);INTRON(MODIFIER||||332|CG11030|protein_coding|CODING|FBtr0332554|1|1)]	This gene is referred to in FlyBase by the symbol Dmel\CG11030 (FBgn0031736). It is a protein_coding_gene from Drosophila melanogaster. It has 2 annotated transcripts and 2 polypeptides (1 unique). Gene sequence location is 2L:5724656..5762420. It has the cytological map location 25F3-25F4. Protein features are: Sas10/Utp3/C1D. Its molecular function is unknown. The biological processes in which …
FBgn0031733	2L_5725558_SNP	A	T	0.1081	4	33	5.63e-06	0.138284	SiteClass[FBgn0031736|CG11030|INTRON|0;FBgn0031733|CG14006|DOWNSTREAM|857],TranscriptAnnot[DOWNSTREAM(MODIFIER||857||429|CG14006|protein_coding|CODING|FBtr0332555||1);INTRON(MODIFIER||||332|CG11030|protein_coding|CODING|FBtr0079135|1|1);INTRON(MODIFIER||||332|CG11030|protein_coding|CODING|FBtr0332554|1|1)]	This gene is referred to in FlyBase by the symbol Dmel\CG14006 (FBgn0031733). It is a protein_coding_gene from Drosophila melanogaster. It has 2 annotated transcripts and 2 polypeptides (1 unique). Gene sequence location is 2L:5726415..5728811. It has the cytological map location 25F4. Protein features are: Adenosine kinase; Carbohydrate kinase PfkB; NEMP family; Ribokinase-like. Its molecular fu…
FBtr0332555	2L_5725558_SNP	A	T	0.1081	4	33	5.63e-06	0.138284	SiteClass[FBgn0031736|CG11030|INTRON|0;FBgn0031733|CG14006|DOWNSTREAM|857],TranscriptAnnot[DOWNSTREAM(MODIFIER||857||429|CG14006|protein_coding|CODING|FBtr0332555||1);INTRON(MODIFIER||||332|CG11030|protein_coding|CODING|FBtr0079135|1|1);INTRON(MODIFIER||||332|CG11030|protein_coding|CODING|FBtr0332554|1|1)]	-
FBtr0079135	2L_5725558_SNP	A	T	0.1081	4	33	5.63e-06	0.138284	SiteClass[FBgn0031736|CG11030|INTRON|0;FBgn0031733|CG14006|DOWNSTREAM|857],TranscriptAnnot[DOWNSTREAM(MODIFIER||857||429|CG14006|protein_coding|CODING|FBtr0332555||1);INTRON(MODIFIER||||332|CG11030|protein_coding|CODING|FBtr0079135|1|1);INTRON(MODIFIER||||332|CG11030|protein_coding|CODING|FBtr0332554|1|1)]	-
FBtr0332554	2L_5725558_SNP	A	T	0.1081	4	33	5.63e-06	0.138284	SiteClass[FBgn0031736|CG11030|INTRON|0;FBgn0031733|CG14006|DOWNSTREAM|857],TranscriptAnnot[DOWNSTREAM(MODIFIER||857||429|CG14006|protein_coding|CODING|FBtr0332555||1);INTRON(MODIFIER||||332|CG11030|protein_coding|CODING|FBtr0079135|1|1);INTRON(MODIFIER||||332|CG11030|protein_coding|CODING|FBtr0332554|1|1)]	-
FBgn0031736	2L_5725573_SNP	A	T	0.1081	4	33	5.63e-06	0.138284	SiteClass[FBgn0031736|CG11030|INTRON|0;FBgn0031733|CG14006|DOWNSTREAM|842],TranscriptAnnot[DOWNSTREAM(MODIFIER||842||429|CG14006|protein_coding|CODING|FBtr0332555||1);INTRON(MODIFIER||||332|CG11030|protein_coding|CODING|FBtr0079135|1|1);INTRON(MODIFIER||||332|CG11030|protein_coding|CODING|FBtr0332554|1|1)]	This gene is referred to in FlyBase by the symbol Dmel\CG11030 (FBgn0031736). It is a protein_coding_gene from Drosophila melanogaster. It has 2 annotated transcripts and 2 polypeptides (1 unique). Gene sequence location is 2L:5724656..5762420. It has the cytological map location 25F3-25F4. Protein features are: Sas10/Utp3/C1D. Its molecular function is unknown. The biological processes in which …
FBgn0031733	2L_5725573_SNP	A	T	0.1081	4	33	5.63e-06	0.138284	SiteClass[FBgn0031736|CG11030|INTRON|0;FBgn0031733|CG14006|DOWNSTREAM|842],TranscriptAnnot[DOWNSTREAM(MODIFIER||842||429|CG14006|protein_coding|CODING|FBtr0332555||1);INTRON(MODIFIER||||332|CG11030|protein_coding|CODING|FBtr0079135|1|1);INTRON(MODIFIER||||332|CG11030|protein_coding|CODING|FBtr0332554|1|1)]	This gene is referred to in FlyBase by the symbol Dmel\CG14006 (FBgn0031733). It is a protein_coding_gene from Drosophila melanogaster. It has 2 annotated transcripts and 2 polypeptides (1 unique). Gene sequence location is 2L:5726415..5728811. It has the cytological map location 25F4. Protein features are: Adenosine kinase; Carbohydrate kinase PfkB; NEMP family; Ribokinase-like. Its molecular fu…
FBtr0332555	2L_5725573_SNP	A	T	0.1081	4	33	5.63e-06	0.138284	SiteClass[FBgn0031736|CG11030|INTRON|0;FBgn0031733|CG14006|DOWNSTREAM|842],TranscriptAnnot[DOWNSTREAM(MODIFIER||842||429|CG14006|protein_coding|CODING|FBtr0332555||1);INTRON(MODIFIER||||332|CG11030|protein_coding|CODING|FBtr0079135|1|1);INTRON(MODIFIER||||332|CG11030|protein_coding|CODING|FBtr0332554|1|1)]	-
FBtr0079135	2L_5725573_SNP	A	T	0.1081	4	33	5.63e-06	0.138284	SiteClass[FBgn0031736|CG11030|INTRON|0;FBgn0031733|CG14006|DOWNSTREAM|842],TranscriptAnnot[DOWNSTREAM(MODIFIER||842||429|CG14006|protein_coding|CODING|FBtr0332555||1);INTRON(MODIFIER||||332|CG11030|protein_coding|CODING|FBtr0079135|1|1);INTRON(MODIFIER||||332|CG11030|protein_coding|CODING|FBtr0332554|1|1)]	-
FBtr0332554	2L_5725573_SNP	A	T	0.1081	4	33	5.63e-06	0.138284	SiteClass[FBgn0031736|CG11030|INTRON|0;FBgn0031733|CG14006|DOWNSTREAM|842],TranscriptAnnot[DOWNSTREAM(MODIFIER||842||429|CG14006|protein_coding|CODING|FBtr0332555||1);INTRON(MODIFIER||||332|CG11030|protein_coding|CODING|FBtr0079135|1|1);INTRON(MODIFIER||||332|CG11030|protein_coding|CODING|FBtr0332554|1|1)]	-
FBgn0035267	3L_1752458_SNP	T	C	0.1081	4	33	5.63e-06	0.138284	SiteClass[FBgn0035267|CG13921|DOWNSTREAM|68;FBgn0022702|Cht2|DOWNSTREAM|85],TranscriptAnnot[UTR_3_PRIME(MODIFIER||175||484|Cht2|protein_coding|CODING|FBtr0305966|4|1);DOWNSTREAM(MODIFIER||85||484|Cht2|protein_coding|CODING|FBtr0072795||1);DOWNSTREAM(MODIFIER||85||484|Cht2|protein_coding|CODING|FBtr0334075||1);DOWNSTREAM(MODIFIER||68||1120|CG13921|protein_coding|CODING|FBtr0072773||1);DOWNSTREAM(M…	This gene is referred to in FlyBase by the symbol Dmel\CG13921 (FBgn0035267). It is a protein_coding_gene from Drosophila melanogaster. It has 5 annotated transcripts and 5 polypeptides (4 unique). Gene sequence location is 3L:1746907..1752390. It has the cytological map location 62B1. Its molecular function is described by: . It is involved in the biological process described with: . 6 alleles a…
FBgn0022702	3L_1752458_SNP	T	C	0.1081	4	33	5.63e-06	0.138284	SiteClass[FBgn0035267|CG13921|DOWNSTREAM|68;FBgn0022702|Cht2|DOWNSTREAM|85],TranscriptAnnot[UTR_3_PRIME(MODIFIER||175||484|Cht2|protein_coding|CODING|FBtr0305966|4|1);DOWNSTREAM(MODIFIER||85||484|Cht2|protein_coding|CODING|FBtr0072795||1);DOWNSTREAM(MODIFIER||85||484|Cht2|protein_coding|CODING|FBtr0334075||1);DOWNSTREAM(MODIFIER||68||1120|CG13921|protein_coding|CODING|FBtr0072773||1);DOWNSTREAM(M…	The gene Chitinase 2 is referred to in FlyBase by the symbol Dmel\Cht2 (CG2054, FBgn0022702). It is a protein_coding_gene from Drosophila melanogaster. It has 3 annotated transcripts and 3 polypeptides (1 unique). Gene sequence location is 3L:1752328..1755934. It has the cytological map location 62B1. Protein features are: Chitinase II; Chitinase insertion domain; Glycoside hydrolase family 18, c…
FBtr0305966	3L_1752458_SNP	T	C	0.1081	4	33	5.63e-06	0.138284	SiteClass[FBgn0035267|CG13921|DOWNSTREAM|68;FBgn0022702|Cht2|DOWNSTREAM|85],TranscriptAnnot[UTR_3_PRIME(MODIFIER||175||484|Cht2|protein_coding|CODING|FBtr0305966|4|1);DOWNSTREAM(MODIFIER||85||484|Cht2|protein_coding|CODING|FBtr0072795||1);DOWNSTREAM(MODIFIER||85||484|Cht2|protein_coding|CODING|FBtr0334075||1);DOWNSTREAM(MODIFIER||68||1120|CG13921|protein_coding|CODING|FBtr0072773||1);DOWNSTREAM(M…	-
FBtr0072795	3L_1752458_SNP	T	C	0.1081	4	33	5.63e-06	0.138284	SiteClass[FBgn0035267|CG13921|DOWNSTREAM|68;FBgn0022702|Cht2|DOWNSTREAM|85],TranscriptAnnot[UTR_3_PRIME(MODIFIER||175||484|Cht2|protein_coding|CODING|FBtr0305966|4|1);DOWNSTREAM(MODIFIER||85||484|Cht2|protein_coding|CODING|FBtr0072795||1);DOWNSTREAM(MODIFIER||85||484|Cht2|protein_coding|CODING|FBtr0334075||1);DOWNSTREAM(MODIFIER||68||1120|CG13921|protein_coding|CODING|FBtr0072773||1);DOWNSTREAM(M…	-
FBtr0334075	3L_1752458_SNP	T	C	0.1081	4	33	5.63e-06	0.138284	SiteClass[FBgn0035267|CG13921|DOWNSTREAM|68;FBgn0022702|Cht2|DOWNSTREAM|85],TranscriptAnnot[UTR_3_PRIME(MODIFIER||175||484|Cht2|protein_coding|CODING|FBtr0305966|4|1);DOWNSTREAM(MODIFIER||85||484|Cht2|protein_coding|CODING|FBtr0072795||1);DOWNSTREAM(MODIFIER||85||484|Cht2|protein_coding|CODING|FBtr0334075||1);DOWNSTREAM(MODIFIER||68||1120|CG13921|protein_coding|CODING|FBtr0072773||1);DOWNSTREAM(M…	-
FBtr0072773	3L_1752458_SNP	T	C	0.1081	4	33	5.63e-06	0.138284	SiteClass[FBgn0035267|CG13921|DOWNSTREAM|68;FBgn0022702|Cht2|DOWNSTREAM|85],TranscriptAnnot[UTR_3_PRIME(MODIFIER||175||484|Cht2|protein_coding|CODING|FBtr0305966|4|1);DOWNSTREAM(MODIFIER||85||484|Cht2|protein_coding|CODING|FBtr0072795||1);DOWNSTREAM(MODIFIER||85||484|Cht2|protein_coding|CODING|FBtr0334075||1);DOWNSTREAM(MODIFIER||68||1120|CG13921|protein_coding|CODING|FBtr0072773||1);DOWNSTREAM(M…	-
FBtr0303104	3L_1752458_SNP	T	C	0.1081	4	33	5.63e-06	0.138284	SiteClass[FBgn0035267|CG13921|DOWNSTREAM|68;FBgn0022702|Cht2|DOWNSTREAM|85],TranscriptAnnot[UTR_3_PRIME(MODIFIER||175||484|Cht2|protein_coding|CODING|FBtr0305966|4|1);DOWNSTREAM(MODIFIER||85||484|Cht2|protein_coding|CODING|FBtr0072795||1);DOWNSTREAM(MODIFIER||85||484|Cht2|protein_coding|CODING|FBtr0334075||1);DOWNSTREAM(MODIFIER||68||1120|CG13921|protein_coding|CODING|FBtr0072773||1);DOWNSTREAM(M…	-
FBtr0303105	3L_1752458_SNP	T	C	0.1081	4	33	5.63e-06	0.138284	SiteClass[FBgn0035267|CG13921|DOWNSTREAM|68;FBgn0022702|Cht2|DOWNSTREAM|85],TranscriptAnnot[UTR_3_PRIME(MODIFIER||175||484|Cht2|protein_coding|CODING|FBtr0305966|4|1);DOWNSTREAM(MODIFIER||85||484|Cht2|protein_coding|CODING|FBtr0072795||1);DOWNSTREAM(MODIFIER||85||484|Cht2|protein_coding|CODING|FBtr0334075||1);DOWNSTREAM(MODIFIER||68||1120|CG13921|protein_coding|CODING|FBtr0072773||1);DOWNSTREAM(M…	-
FBtr0310623	3L_1752458_SNP	T	C	0.1081	4	33	5.63e-06	0.138284	SiteClass[FBgn0035267|CG13921|DOWNSTREAM|68;FBgn0022702|Cht2|DOWNSTREAM|85],TranscriptAnnot[UTR_3_PRIME(MODIFIER||175||484|Cht2|protein_coding|CODING|FBtr0305966|4|1);DOWNSTREAM(MODIFIER||85||484|Cht2|protein_coding|CODING|FBtr0072795||1);DOWNSTREAM(MODIFIER||85||484|Cht2|protein_coding|CODING|FBtr0334075||1);DOWNSTREAM(MODIFIER||68||1120|CG13921|protein_coding|CODING|FBtr0072773||1);DOWNSTREAM(M…	-
FBtr0334072	3L_1752458_SNP	T	C	0.1081	4	33	5.63e-06	0.138284	SiteClass[FBgn0035267|CG13921|DOWNSTREAM|68;FBgn0022702|Cht2|DOWNSTREAM|85],TranscriptAnnot[UTR_3_PRIME(MODIFIER||175||484|Cht2|protein_coding|CODING|FBtr0305966|4|1);DOWNSTREAM(MODIFIER||85||484|Cht2|protein_coding|CODING|FBtr0072795||1);DOWNSTREAM(MODIFIER||85||484|Cht2|protein_coding|CODING|FBtr0334075||1);DOWNSTREAM(MODIFIER||68||1120|CG13921|protein_coding|CODING|FBtr0072773||1);DOWNSTREAM(M…	-
FBgn0031736	2L_5725494_SNP	T	C	0.1111	4	32	5.97e-06	0.138284	SiteClass[FBgn0031736|CG11030|INTRON|0;FBgn0031733|CG14006|DOWNSTREAM|921],TranscriptAnnot[DOWNSTREAM(MODIFIER||921||429|CG14006|protein_coding|CODING|FBtr0332555||1);INTRON(MODIFIER||||332|CG11030|protein_coding|CODING|FBtr0079135|1|1);INTRON(MODIFIER||||332|CG11030|protein_coding|CODING|FBtr0332554|1|1)]	This gene is referred to in FlyBase by the symbol Dmel\CG11030 (FBgn0031736). It is a protein_coding_gene from Drosophila melanogaster. It has 2 annotated transcripts and 2 polypeptides (1 unique). Gene sequence location is 2L:5724656..5762420. It has the cytological map location 25F3-25F4. Protein features are: Sas10/Utp3/C1D. Its molecular function is unknown. The biological processes in which …
FBgn0031733	2L_5725494_SNP	T	C	0.1111	4	32	5.97e-06	0.138284	SiteClass[FBgn0031736|CG11030|INTRON|0;FBgn0031733|CG14006|DOWNSTREAM|921],TranscriptAnnot[DOWNSTREAM(MODIFIER||921||429|CG14006|protein_coding|CODING|FBtr0332555||1);INTRON(MODIFIER||||332|CG11030|protein_coding|CODING|FBtr0079135|1|1);INTRON(MODIFIER||||332|CG11030|protein_coding|CODING|FBtr0332554|1|1)]	This gene is referred to in FlyBase by the symbol Dmel\CG14006 (FBgn0031733). It is a protein_coding_gene from Drosophila melanogaster. It has 2 annotated transcripts and 2 polypeptides (1 unique). Gene sequence location is 2L:5726415..5728811. It has the cytological map location 25F4. Protein features are: Adenosine kinase; Carbohydrate kinase PfkB; NEMP family; Ribokinase-like. Its molecular fu…
FBtr0332555	2L_5725494_SNP	T	C	0.1111	4	32	5.97e-06	0.138284	SiteClass[FBgn0031736|CG11030|INTRON|0;FBgn0031733|CG14006|DOWNSTREAM|921],TranscriptAnnot[DOWNSTREAM(MODIFIER||921||429|CG14006|protein_coding|CODING|FBtr0332555||1);INTRON(MODIFIER||||332|CG11030|protein_coding|CODING|FBtr0079135|1|1);INTRON(MODIFIER||||332|CG11030|protein_coding|CODING|FBtr0332554|1|1)]	-
FBtr0079135	2L_5725494_SNP	T	C	0.1111	4	32	5.97e-06	0.138284	SiteClass[FBgn0031736|CG11030|INTRON|0;FBgn0031733|CG14006|DOWNSTREAM|921],TranscriptAnnot[DOWNSTREAM(MODIFIER||921||429|CG14006|protein_coding|CODING|FBtr0332555||1);INTRON(MODIFIER||||332|CG11030|protein_coding|CODING|FBtr0079135|1|1);INTRON(MODIFIER||||332|CG11030|protein_coding|CODING|FBtr0332554|1|1)]	-
FBtr0332554	2L_5725494_SNP	T	C	0.1111	4	32	5.97e-06	0.138284	SiteClass[FBgn0031736|CG11030|INTRON|0;FBgn0031733|CG14006|DOWNSTREAM|921],TranscriptAnnot[DOWNSTREAM(MODIFIER||921||429|CG14006|protein_coding|CODING|FBtr0332555||1);INTRON(MODIFIER||||332|CG11030|protein_coding|CODING|FBtr0079135|1|1);INTRON(MODIFIER||||332|CG11030|protein_coding|CODING|FBtr0332554|1|1)]	-
FBgn0039584	3R_24247691_SNP	A	T	0.1176	4	30	6.2e-06	0.138284	SiteClass[FBgn0039584|beat-VI|INTRON|0],TranscriptAnnot[INTRON(MODIFIER||||332|beat-VI|protein_coding|CODING|FBtr0085289|1|1);INTRON(MODIFIER||||332|beat-VI|protein_coding|CODING|FBtr0333336|1|1)]	The gene beat-VI is referred to in FlyBase by the symbol Dmel\beat-VI (CG14064, FBgn0039584). It is a protein_coding_gene from Drosophila melanogaster. It has 2 annotated transcripts and 2 polypeptides (1 unique). Gene sequence location is 3R:28418208..28474814. It has the cytological map location 98D1-98D2. Protein features are: CD80-like, immunoglobulin C2-set; Immunoglobulin V-set domain; Immu…
FBtr0085289	3R_24247691_SNP	A	T	0.1176	4	30	6.2e-06	0.138284	SiteClass[FBgn0039584|beat-VI|INTRON|0],TranscriptAnnot[INTRON(MODIFIER||||332|beat-VI|protein_coding|CODING|FBtr0085289|1|1);INTRON(MODIFIER||||332|beat-VI|protein_coding|CODING|FBtr0333336|1|1)]	-
FBtr0333336	3R_24247691_SNP	A	T	0.1176	4	30	6.2e-06	0.138284	SiteClass[FBgn0039584|beat-VI|INTRON|0],TranscriptAnnot[INTRON(MODIFIER||||332|beat-VI|protein_coding|CODING|FBtr0085289|1|1);INTRON(MODIFIER||||332|beat-VI|protein_coding|CODING|FBtr0333336|1|1)]	-
FBgn0031736	2L_5725273_SNP	T	C	0.1143	4	31	6.75e-06	0.138284	SiteClass[FBgn0031736|CG11030|INTRON|0],TranscriptAnnot[INTRON(MODIFIER||||332|CG11030|protein_coding|CODING|FBtr0079135|1|1);INTRON(MODIFIER||||332|CG11030|protein_coding|CODING|FBtr0332554|1|1)]	This gene is referred to in FlyBase by the symbol Dmel\CG11030 (FBgn0031736). It is a protein_coding_gene from Drosophila melanogaster. It has 2 annotated transcripts and 2 polypeptides (1 unique). Gene sequence location is 2L:5724656..5762420. It has the cytological map location 25F3-25F4. Protein features are: Sas10/Utp3/C1D. Its molecular function is unknown. The biological processes in which …
FBtr0079135	2L_5725273_SNP	T	C	0.1143	4	31	6.75e-06	0.138284	SiteClass[FBgn0031736|CG11030|INTRON|0],TranscriptAnnot[INTRON(MODIFIER||||332|CG11030|protein_coding|CODING|FBtr0079135|1|1);INTRON(MODIFIER||||332|CG11030|protein_coding|CODING|FBtr0332554|1|1)]	-
FBtr0332554	2L_5725273_SNP	T	C	0.1143	4	31	6.75e-06	0.138284	SiteClass[FBgn0031736|CG11030|INTRON|0],TranscriptAnnot[INTRON(MODIFIER||||332|CG11030|protein_coding|CODING|FBtr0079135|1|1);INTRON(MODIFIER||||332|CG11030|protein_coding|CODING|FBtr0332554|1|1)]	-
FBgn0031736	2L_5725284_SNP	T	G	0.1143	4	31	6.75e-06	0.138284	SiteClass[FBgn0031736|CG11030|INTRON|0],TranscriptAnnot[INTRON(MODIFIER||||332|CG11030|protein_coding|CODING|FBtr0079135|1|1);INTRON(MODIFIER||||332|CG11030|protein_coding|CODING|FBtr0332554|1|1)]	This gene is referred to in FlyBase by the symbol Dmel\CG11030 (FBgn0031736). It is a protein_coding_gene from Drosophila melanogaster. It has 2 annotated transcripts and 2 polypeptides (1 unique). Gene sequence location is 2L:5724656..5762420. It has the cytological map location 25F3-25F4. Protein features are: Sas10/Utp3/C1D. Its molecular function is unknown. The biological processes in which …
FBtr0079135	2L_5725284_SNP	T	G	0.1143	4	31	6.75e-06	0.138284	SiteClass[FBgn0031736|CG11030|INTRON|0],TranscriptAnnot[INTRON(MODIFIER||||332|CG11030|protein_coding|CODING|FBtr0079135|1|1);INTRON(MODIFIER||||332|CG11030|protein_coding|CODING|FBtr0332554|1|1)]	-
FBtr0332554	2L_5725284_SNP	T	G	0.1143	4	31	6.75e-06	0.138284	SiteClass[FBgn0031736|CG11030|INTRON|0],TranscriptAnnot[INTRON(MODIFIER||||332|CG11030|protein_coding|CODING|FBtr0079135|1|1);INTRON(MODIFIER||||332|CG11030|protein_coding|CODING|FBtr0332554|1|1)]	-
FBgn0031187	X_21859155_SNP	T	G	0.1143	4	31	7.14e-06	0.138284	SiteClass[FBgn0031187|CG14619|INTRON|0],TranscriptAnnot[INTRON(MODIFIER||||856|CG14619|protein_coding|CODING|FBtr0077346|1|1);INTRON(MODIFIER||||938|CG14619|protein_coding|CODING|FBtr0077349|1|1);INTRON(MODIFIER||||938|CG14619|protein_coding|CODING|FBtr0309238|1|1);INTRON(MODIFIER||||938|CG14619|protein_coding|CODING|FBtr0309239|1|1);INTRON(MODIFIER||||565|CG14619|protein_coding|CODING|FBtr033950…	The gene Ubiquitin specific protease 2 is referred to in FlyBase by the symbol Dmel\Usp2 (CG14619, FBgn0031187). It is a protein_coding_gene from Drosophila melanogaster. It has 9 annotated transcripts and 9 polypeptides (5 unique). Gene sequence location is X:22455803..22470146. It has the cytological map location 20C1. Protein features are: Peptidase C19, ubiquitin carboxyl-terminal hydrolase; …
FBtr0077346	X_21859155_SNP	T	G	0.1143	4	31	7.14e-06	0.138284	SiteClass[FBgn0031187|CG14619|INTRON|0],TranscriptAnnot[INTRON(MODIFIER||||856|CG14619|protein_coding|CODING|FBtr0077346|1|1);INTRON(MODIFIER||||938|CG14619|protein_coding|CODING|FBtr0077349|1|1);INTRON(MODIFIER||||938|CG14619|protein_coding|CODING|FBtr0309238|1|1);INTRON(MODIFIER||||938|CG14619|protein_coding|CODING|FBtr0309239|1|1);INTRON(MODIFIER||||565|CG14619|protein_coding|CODING|FBtr033950…	-
FBtr0077349	X_21859155_SNP	T	G	0.1143	4	31	7.14e-06	0.138284	SiteClass[FBgn0031187|CG14619|INTRON|0],TranscriptAnnot[INTRON(MODIFIER||||856|CG14619|protein_coding|CODING|FBtr0077346|1|1);INTRON(MODIFIER||||938|CG14619|protein_coding|CODING|FBtr0077349|1|1);INTRON(MODIFIER||||938|CG14619|protein_coding|CODING|FBtr0309238|1|1);INTRON(MODIFIER||||938|CG14619|protein_coding|CODING|FBtr0309239|1|1);INTRON(MODIFIER||||565|CG14619|protein_coding|CODING|FBtr033950…	-
FBtr0309238	X_21859155_SNP	T	G	0.1143	4	31	7.14e-06	0.138284	SiteClass[FBgn0031187|CG14619|INTRON|0],TranscriptAnnot[INTRON(MODIFIER||||856|CG14619|protein_coding|CODING|FBtr0077346|1|1);INTRON(MODIFIER||||938|CG14619|protein_coding|CODING|FBtr0077349|1|1);INTRON(MODIFIER||||938|CG14619|protein_coding|CODING|FBtr0309238|1|1);INTRON(MODIFIER||||938|CG14619|protein_coding|CODING|FBtr0309239|1|1);INTRON(MODIFIER||||565|CG14619|protein_coding|CODING|FBtr033950…	-
FBtr0309239	X_21859155_SNP	T	G	0.1143	4	31	7.14e-06	0.138284	SiteClass[FBgn0031187|CG14619|INTRON|0],TranscriptAnnot[INTRON(MODIFIER||||856|CG14619|protein_coding|CODING|FBtr0077346|1|1);INTRON(MODIFIER||||938|CG14619|protein_coding|CODING|FBtr0077349|1|1);INTRON(MODIFIER||||938|CG14619|protein_coding|CODING|FBtr0309238|1|1);INTRON(MODIFIER||||938|CG14619|protein_coding|CODING|FBtr0309239|1|1);INTRON(MODIFIER||||565|CG14619|protein_coding|CODING|FBtr033950…	-
FBtr0339506	X_21859155_SNP	T	G	0.1143	4	31	7.14e-06	0.138284	SiteClass[FBgn0031187|CG14619|INTRON|0],TranscriptAnnot[INTRON(MODIFIER||||856|CG14619|protein_coding|CODING|FBtr0077346|1|1);INTRON(MODIFIER||||938|CG14619|protein_coding|CODING|FBtr0077349|1|1);INTRON(MODIFIER||||938|CG14619|protein_coding|CODING|FBtr0309238|1|1);INTRON(MODIFIER||||938|CG14619|protein_coding|CODING|FBtr0309239|1|1);INTRON(MODIFIER||||565|CG14619|protein_coding|CODING|FBtr033950…	-
FBtr0339507	X_21859155_SNP	T	G	0.1143	4	31	7.14e-06	0.138284	SiteClass[FBgn0031187|CG14619|INTRON|0],TranscriptAnnot[INTRON(MODIFIER||||856|CG14619|protein_coding|CODING|FBtr0077346|1|1);INTRON(MODIFIER||||938|CG14619|protein_coding|CODING|FBtr0077349|1|1);INTRON(MODIFIER||||938|CG14619|protein_coding|CODING|FBtr0309238|1|1);INTRON(MODIFIER||||938|CG14619|protein_coding|CODING|FBtr0309239|1|1);INTRON(MODIFIER||||565|CG14619|protein_coding|CODING|FBtr033950…	-
FBtr0339508	X_21859155_SNP	T	G	0.1143	4	31	7.14e-06	0.138284	SiteClass[FBgn0031187|CG14619|INTRON|0],TranscriptAnnot[INTRON(MODIFIER||||856|CG14619|protein_coding|CODING|FBtr0077346|1|1);INTRON(MODIFIER||||938|CG14619|protein_coding|CODING|FBtr0077349|1|1);INTRON(MODIFIER||||938|CG14619|protein_coding|CODING|FBtr0309238|1|1);INTRON(MODIFIER||||938|CG14619|protein_coding|CODING|FBtr0309239|1|1);INTRON(MODIFIER||||565|CG14619|protein_coding|CODING|FBtr033950…	-
FBtr0077347	X_21859155_SNP	T	G	0.1143	4	31	7.14e-06	0.138284	SiteClass[FBgn0031187|CG14619|INTRON|0],TranscriptAnnot[INTRON(MODIFIER||||856|CG14619|protein_coding|CODING|FBtr0077346|1|1);INTRON(MODIFIER||||938|CG14619|protein_coding|CODING|FBtr0077349|1|1);INTRON(MODIFIER||||938|CG14619|protein_coding|CODING|FBtr0309238|1|1);INTRON(MODIFIER||||938|CG14619|protein_coding|CODING|FBtr0309239|1|1);INTRON(MODIFIER||||565|CG14619|protein_coding|CODING|FBtr033950…	-
FBtr0077348	X_21859155_SNP	T	G	0.1143	4	31	7.14e-06	0.138284	SiteClass[FBgn0031187|CG14619|INTRON|0],TranscriptAnnot[INTRON(MODIFIER||||856|CG14619|protein_coding|CODING|FBtr0077346|1|1);INTRON(MODIFIER||||938|CG14619|protein_coding|CODING|FBtr0077349|1|1);INTRON(MODIFIER||||938|CG14619|protein_coding|CODING|FBtr0309238|1|1);INTRON(MODIFIER||||938|CG14619|protein_coding|CODING|FBtr0309239|1|1);INTRON(MODIFIER||||565|CG14619|protein_coding|CODING|FBtr033950…	-
FBgn0027492	3R_23395889_SNP	C	A	0.1081	4	33	7.2e-06	0.138284	SiteClass[FBgn0027492|wdb|INTRON|0],TranscriptAnnot[INTRON(MODIFIER||||524|wdb|protein_coding|CODING|FBtr0085204|2|1);INTRON(MODIFIER||||524|wdb|protein_coding|CODING|FBtr0085209|2|1);INTRON(MODIFIER||||524|wdb|protein_coding|CODING|FBtr0085208|1|1);INTRON(MODIFIER||||524|wdb|protein_coding|CODING|FBtr0085205|1|1);INTRON(MODIFIER||||524|wdb|protein_coding|CODING|FBtr0085207|1|1);INTRON(MODIFIER||…	The gene widerborst is referred to in FlyBase by the symbol Dmel\wdb (CG5643, FBgn0027492). It is a protein_coding_gene from Drosophila melanogaster. It has 6 annotated transcripts and 6 polypeptides (1 unique). Gene sequence location is 3R:27561675..27582241. It has the cytological map location 98A6-98A8. Protein features are: Armadillo-type fold; Protein phosphatase 2A, regulatory B subunit, B5…
FBtr0085204	3R_23395889_SNP	C	A	0.1081	4	33	7.2e-06	0.138284	SiteClass[FBgn0027492|wdb|INTRON|0],TranscriptAnnot[INTRON(MODIFIER||||524|wdb|protein_coding|CODING|FBtr0085204|2|1);INTRON(MODIFIER||||524|wdb|protein_coding|CODING|FBtr0085209|2|1);INTRON(MODIFIER||||524|wdb|protein_coding|CODING|FBtr0085208|1|1);INTRON(MODIFIER||||524|wdb|protein_coding|CODING|FBtr0085205|1|1);INTRON(MODIFIER||||524|wdb|protein_coding|CODING|FBtr0085207|1|1);INTRON(MODIFIER||…	-
FBtr0085209	3R_23395889_SNP	C	A	0.1081	4	33	7.2e-06	0.138284	SiteClass[FBgn0027492|wdb|INTRON|0],TranscriptAnnot[INTRON(MODIFIER||||524|wdb|protein_coding|CODING|FBtr0085204|2|1);INTRON(MODIFIER||||524|wdb|protein_coding|CODING|FBtr0085209|2|1);INTRON(MODIFIER||||524|wdb|protein_coding|CODING|FBtr0085208|1|1);INTRON(MODIFIER||||524|wdb|protein_coding|CODING|FBtr0085205|1|1);INTRON(MODIFIER||||524|wdb|protein_coding|CODING|FBtr0085207|1|1);INTRON(MODIFIER||…	-
FBtr0085208	3R_23395889_SNP	C	A	0.1081	4	33	7.2e-06	0.138284	SiteClass[FBgn0027492|wdb|INTRON|0],TranscriptAnnot[INTRON(MODIFIER||||524|wdb|protein_coding|CODING|FBtr0085204|2|1);INTRON(MODIFIER||||524|wdb|protein_coding|CODING|FBtr0085209|2|1);INTRON(MODIFIER||||524|wdb|protein_coding|CODING|FBtr0085208|1|1);INTRON(MODIFIER||||524|wdb|protein_coding|CODING|FBtr0085205|1|1);INTRON(MODIFIER||||524|wdb|protein_coding|CODING|FBtr0085207|1|1);INTRON(MODIFIER||…	-
FBtr0085205	3R_23395889_SNP	C	A	0.1081	4	33	7.2e-06	0.138284	SiteClass[FBgn0027492|wdb|INTRON|0],TranscriptAnnot[INTRON(MODIFIER||||524|wdb|protein_coding|CODING|FBtr0085204|2|1);INTRON(MODIFIER||||524|wdb|protein_coding|CODING|FBtr0085209|2|1);INTRON(MODIFIER||||524|wdb|protein_coding|CODING|FBtr0085208|1|1);INTRON(MODIFIER||||524|wdb|protein_coding|CODING|FBtr0085205|1|1);INTRON(MODIFIER||||524|wdb|protein_coding|CODING|FBtr0085207|1|1);INTRON(MODIFIER||…	-
FBtr0085207	3R_23395889_SNP	C	A	0.1081	4	33	7.2e-06	0.138284	SiteClass[FBgn0027492|wdb|INTRON|0],TranscriptAnnot[INTRON(MODIFIER||||524|wdb|protein_coding|CODING|FBtr0085204|2|1);INTRON(MODIFIER||||524|wdb|protein_coding|CODING|FBtr0085209|2|1);INTRON(MODIFIER||||524|wdb|protein_coding|CODING|FBtr0085208|1|1);INTRON(MODIFIER||||524|wdb|protein_coding|CODING|FBtr0085205|1|1);INTRON(MODIFIER||||524|wdb|protein_coding|CODING|FBtr0085207|1|1);INTRON(MODIFIER||…	-
FBtr0085203	3R_23395889_SNP	C	A	0.1081	4	33	7.2e-06	0.138284	SiteClass[FBgn0027492|wdb|INTRON|0],TranscriptAnnot[INTRON(MODIFIER||||524|wdb|protein_coding|CODING|FBtr0085204|2|1);INTRON(MODIFIER||||524|wdb|protein_coding|CODING|FBtr0085209|2|1);INTRON(MODIFIER||||524|wdb|protein_coding|CODING|FBtr0085208|1|1);INTRON(MODIFIER||||524|wdb|protein_coding|CODING|FBtr0085205|1|1);INTRON(MODIFIER||||524|wdb|protein_coding|CODING|FBtr0085207|1|1);INTRON(MODIFIER||…	-
FBgn0027492	3R_23395891_SNP	A	T	0.1081	4	33	7.2e-06	0.138284	SiteClass[FBgn0027492|wdb|INTRON|0],TranscriptAnnot[INTRON(MODIFIER||||524|wdb|protein_coding|CODING|FBtr0085204|2|1);INTRON(MODIFIER||||524|wdb|protein_coding|CODING|FBtr0085209|2|1);INTRON(MODIFIER||||524|wdb|protein_coding|CODING|FBtr0085208|1|1);INTRON(MODIFIER||||524|wdb|protein_coding|CODING|FBtr0085205|1|1);INTRON(MODIFIER||||524|wdb|protein_coding|CODING|FBtr0085207|1|1);INTRON(MODIFIER||…	The gene widerborst is referred to in FlyBase by the symbol Dmel\wdb (CG5643, FBgn0027492). It is a protein_coding_gene from Drosophila melanogaster. It has 6 annotated transcripts and 6 polypeptides (1 unique). Gene sequence location is 3R:27561675..27582241. It has the cytological map location 98A6-98A8. Protein features are: Armadillo-type fold; Protein phosphatase 2A, regulatory B subunit, B5…
FBtr0085204	3R_23395891_SNP	A	T	0.1081	4	33	7.2e-06	0.138284	SiteClass[FBgn0027492|wdb|INTRON|0],TranscriptAnnot[INTRON(MODIFIER||||524|wdb|protein_coding|CODING|FBtr0085204|2|1);INTRON(MODIFIER||||524|wdb|protein_coding|CODING|FBtr0085209|2|1);INTRON(MODIFIER||||524|wdb|protein_coding|CODING|FBtr0085208|1|1);INTRON(MODIFIER||||524|wdb|protein_coding|CODING|FBtr0085205|1|1);INTRON(MODIFIER||||524|wdb|protein_coding|CODING|FBtr0085207|1|1);INTRON(MODIFIER||…	-
FBtr0085209	3R_23395891_SNP	A	T	0.1081	4	33	7.2e-06	0.138284	SiteClass[FBgn0027492|wdb|INTRON|0],TranscriptAnnot[INTRON(MODIFIER||||524|wdb|protein_coding|CODING|FBtr0085204|2|1);INTRON(MODIFIER||||524|wdb|protein_coding|CODING|FBtr0085209|2|1);INTRON(MODIFIER||||524|wdb|protein_coding|CODING|FBtr0085208|1|1);INTRON(MODIFIER||||524|wdb|protein_coding|CODING|FBtr0085205|1|1);INTRON(MODIFIER||||524|wdb|protein_coding|CODING|FBtr0085207|1|1);INTRON(MODIFIER||…	-
FBtr0085208	3R_23395891_SNP	A	T	0.1081	4	33	7.2e-06	0.138284	SiteClass[FBgn0027492|wdb|INTRON|0],TranscriptAnnot[INTRON(MODIFIER||||524|wdb|protein_coding|CODING|FBtr0085204|2|1);INTRON(MODIFIER||||524|wdb|protein_coding|CODING|FBtr0085209|2|1);INTRON(MODIFIER||||524|wdb|protein_coding|CODING|FBtr0085208|1|1);INTRON(MODIFIER||||524|wdb|protein_coding|CODING|FBtr0085205|1|1);INTRON(MODIFIER||||524|wdb|protein_coding|CODING|FBtr0085207|1|1);INTRON(MODIFIER||…	-
FBtr0085205	3R_23395891_SNP	A	T	0.1081	4	33	7.2e-06	0.138284	SiteClass[FBgn0027492|wdb|INTRON|0],TranscriptAnnot[INTRON(MODIFIER||||524|wdb|protein_coding|CODING|FBtr0085204|2|1);INTRON(MODIFIER||||524|wdb|protein_coding|CODING|FBtr0085209|2|1);INTRON(MODIFIER||||524|wdb|protein_coding|CODING|FBtr0085208|1|1);INTRON(MODIFIER||||524|wdb|protein_coding|CODING|FBtr0085205|1|1);INTRON(MODIFIER||||524|wdb|protein_coding|CODING|FBtr0085207|1|1);INTRON(MODIFIER||…	-
FBtr0085207	3R_23395891_SNP	A	T	0.1081	4	33	7.2e-06	0.138284	SiteClass[FBgn0027492|wdb|INTRON|0],TranscriptAnnot[INTRON(MODIFIER||||524|wdb|protein_coding|CODING|FBtr0085204|2|1);INTRON(MODIFIER||||524|wdb|protein_coding|CODING|FBtr0085209|2|1);INTRON(MODIFIER||||524|wdb|protein_coding|CODING|FBtr0085208|1|1);INTRON(MODIFIER||||524|wdb|protein_coding|CODING|FBtr0085205|1|1);INTRON(MODIFIER||||524|wdb|protein_coding|CODING|FBtr0085207|1|1);INTRON(MODIFIER||…	-
FBtr0085203	3R_23395891_SNP	A	T	0.1081	4	33	7.2e-06	0.138284	SiteClass[FBgn0027492|wdb|INTRON|0],TranscriptAnnot[INTRON(MODIFIER||||524|wdb|protein_coding|CODING|FBtr0085204|2|1);INTRON(MODIFIER||||524|wdb|protein_coding|CODING|FBtr0085209|2|1);INTRON(MODIFIER||||524|wdb|protein_coding|CODING|FBtr0085208|1|1);INTRON(MODIFIER||||524|wdb|protein_coding|CODING|FBtr0085205|1|1);INTRON(MODIFIER||||524|wdb|protein_coding|CODING|FBtr0085207|1|1);INTRON(MODIFIER||…	-
FBgn0027492	3R_23395908_SNP	A	T	0.1081	4	33	7.2e-06	0.138284	SiteClass[FBgn0027492|wdb|INTRON|0],TranscriptAnnot[INTRON(MODIFIER||||524|wdb|protein_coding|CODING|FBtr0085204|2|1);INTRON(MODIFIER||||524|wdb|protein_coding|CODING|FBtr0085209|2|1);INTRON(MODIFIER||||524|wdb|protein_coding|CODING|FBtr0085208|1|1);INTRON(MODIFIER||||524|wdb|protein_coding|CODING|FBtr0085205|1|1);INTRON(MODIFIER||||524|wdb|protein_coding|CODING|FBtr0085207|1|1);INTRON(MODIFIER||…	The gene widerborst is referred to in FlyBase by the symbol Dmel\wdb (CG5643, FBgn0027492). It is a protein_coding_gene from Drosophila melanogaster. It has 6 annotated transcripts and 6 polypeptides (1 unique). Gene sequence location is 3R:27561675..27582241. It has the cytological map location 98A6-98A8. Protein features are: Armadillo-type fold; Protein phosphatase 2A, regulatory B subunit, B5…
FBtr0085204	3R_23395908_SNP	A	T	0.1081	4	33	7.2e-06	0.138284	SiteClass[FBgn0027492|wdb|INTRON|0],TranscriptAnnot[INTRON(MODIFIER||||524|wdb|protein_coding|CODING|FBtr0085204|2|1);INTRON(MODIFIER||||524|wdb|protein_coding|CODING|FBtr0085209|2|1);INTRON(MODIFIER||||524|wdb|protein_coding|CODING|FBtr0085208|1|1);INTRON(MODIFIER||||524|wdb|protein_coding|CODING|FBtr0085205|1|1);INTRON(MODIFIER||||524|wdb|protein_coding|CODING|FBtr0085207|1|1);INTRON(MODIFIER||…	-
FBtr0085209	3R_23395908_SNP	A	T	0.1081	4	33	7.2e-06	0.138284	SiteClass[FBgn0027492|wdb|INTRON|0],TranscriptAnnot[INTRON(MODIFIER||||524|wdb|protein_coding|CODING|FBtr0085204|2|1);INTRON(MODIFIER||||524|wdb|protein_coding|CODING|FBtr0085209|2|1);INTRON(MODIFIER||||524|wdb|protein_coding|CODING|FBtr0085208|1|1);INTRON(MODIFIER||||524|wdb|protein_coding|CODING|FBtr0085205|1|1);INTRON(MODIFIER||||524|wdb|protein_coding|CODING|FBtr0085207|1|1);INTRON(MODIFIER||…	-
FBtr0085208	3R_23395908_SNP	A	T	0.1081	4	33	7.2e-06	0.138284	SiteClass[FBgn0027492|wdb|INTRON|0],TranscriptAnnot[INTRON(MODIFIER||||524|wdb|protein_coding|CODING|FBtr0085204|2|1);INTRON(MODIFIER||||524|wdb|protein_coding|CODING|FBtr0085209|2|1);INTRON(MODIFIER||||524|wdb|protein_coding|CODING|FBtr0085208|1|1);INTRON(MODIFIER||||524|wdb|protein_coding|CODING|FBtr0085205|1|1);INTRON(MODIFIER||||524|wdb|protein_coding|CODING|FBtr0085207|1|1);INTRON(MODIFIER||…	-
FBtr0085205	3R_23395908_SNP	A	T	0.1081	4	33	7.2e-06	0.138284	SiteClass[FBgn0027492|wdb|INTRON|0],TranscriptAnnot[INTRON(MODIFIER||||524|wdb|protein_coding|CODING|FBtr0085204|2|1);INTRON(MODIFIER||||524|wdb|protein_coding|CODING|FBtr0085209|2|1);INTRON(MODIFIER||||524|wdb|protein_coding|CODING|FBtr0085208|1|1);INTRON(MODIFIER||||524|wdb|protein_coding|CODING|FBtr0085205|1|1);INTRON(MODIFIER||||524|wdb|protein_coding|CODING|FBtr0085207|1|1);INTRON(MODIFIER||…	-
FBtr0085207	3R_23395908_SNP	A	T	0.1081	4	33	7.2e-06	0.138284	SiteClass[FBgn0027492|wdb|INTRON|0],TranscriptAnnot[INTRON(MODIFIER||||524|wdb|protein_coding|CODING|FBtr0085204|2|1);INTRON(MODIFIER||||524|wdb|protein_coding|CODING|FBtr0085209|2|1);INTRON(MODIFIER||||524|wdb|protein_coding|CODING|FBtr0085208|1|1);INTRON(MODIFIER||||524|wdb|protein_coding|CODING|FBtr0085205|1|1);INTRON(MODIFIER||||524|wdb|protein_coding|CODING|FBtr0085207|1|1);INTRON(MODIFIER||…	-
FBtr0085203	3R_23395908_SNP	A	T	0.1081	4	33	7.2e-06	0.138284	SiteClass[FBgn0027492|wdb|INTRON|0],TranscriptAnnot[INTRON(MODIFIER||||524|wdb|protein_coding|CODING|FBtr0085204|2|1);INTRON(MODIFIER||||524|wdb|protein_coding|CODING|FBtr0085209|2|1);INTRON(MODIFIER||||524|wdb|protein_coding|CODING|FBtr0085208|1|1);INTRON(MODIFIER||||524|wdb|protein_coding|CODING|FBtr0085205|1|1);INTRON(MODIFIER||||524|wdb|protein_coding|CODING|FBtr0085207|1|1);INTRON(MODIFIER||…	-
FBgn0033728	2R_8290786_INS	GG	G	0.1143	4	31	7.49e-06	0.138284	SiteClass[FBgn0033728|Cpr49Ae|INTRON|0],TranscriptAnnot[INTRON(MODIFIER||||134|Cpr49Ae|protein_coding|CODING|FBtr0087920|1|1)]	The gene Cuticular protein 49Ae is referred to in FlyBase by the symbol Dmel\Cpr49Ae (CG8505, FBgn0033728). It is a protein_coding_gene from Drosophila melanogaster. It has one annotated transcript and one polypeptide. Gene sequence location is 2R:12402216..12405108. It has the cytological map location 49A2. Protein features are: Chitin-binding type R&R consensus; Insect cuticle protein. Its mole…
FBtr0087920	2R_8290786_INS	GG	G	0.1143	4	31	7.49e-06	0.138284	SiteClass[FBgn0033728|Cpr49Ae|INTRON|0],TranscriptAnnot[INTRON(MODIFIER||||134|Cpr49Ae|protein_coding|CODING|FBtr0087920|1|1)]	-
FBgn0039290	3R_21028610_DEL	A	AT	0.1111	4	32	7.58e-06	0.138284	SiteClass[FBgn0039290|CG13654|INTRON|0;FBgn0022800|Cad96Ca|INTRON|0],TranscriptAnnot[INTRON(MODIFIER||||993|CG13654|protein_coding|CODING|FBtr0084805|1|1);INTRON(MODIFIER||||773|Cad96Ca|protein_coding|CODING|FBtr0084874|4|1)]	This gene is referred to in FlyBase by the symbol Dmel\CG13654 (FBgn0039290). It is a protein_coding_gene from Drosophila melanogaster. It has 3 annotated transcripts and 3 polypeptides (2 unique). Gene sequence location is 3R:25199818..25214255. It has the cytological map location 96C4-96C5. Protein features are: EGF-like domain; EGF-like, conserved site; Protein of unknown function DUF3522. Its…
FBgn0022800	3R_21028610_DEL	A	AT	0.1111	4	32	7.58e-06	0.138284	SiteClass[FBgn0039290|CG13654|INTRON|0;FBgn0022800|Cad96Ca|INTRON|0],TranscriptAnnot[INTRON(MODIFIER||||993|CG13654|protein_coding|CODING|FBtr0084805|1|1);INTRON(MODIFIER||||773|Cad96Ca|protein_coding|CODING|FBtr0084874|4|1)]	The gene Cadherin 96Ca is referred to in FlyBase by the symbol Dmel\Cad96Ca (CG10244, FBgn0022800). It is a protein_coding_gene from Drosophila melanogaster. It has one annotated transcript and one polypeptide. Gene sequence location is 3R:25197571..25208283. It has the cytological map location 96C4-96C5. Protein features are: Cadherin; Cadherin-like; Protein kinase domain; Protein kinase, ATP bi…
FBtr0084805	3R_21028610_DEL	A	AT	0.1111	4	32	7.58e-06	0.138284	SiteClass[FBgn0039290|CG13654|INTRON|0;FBgn0022800|Cad96Ca|INTRON|0],TranscriptAnnot[INTRON(MODIFIER||||993|CG13654|protein_coding|CODING|FBtr0084805|1|1);INTRON(MODIFIER||||773|Cad96Ca|protein_coding|CODING|FBtr0084874|4|1)]	-
FBtr0084874	3R_21028610_DEL	A	AT	0.1111	4	32	7.58e-06	0.138284	SiteClass[FBgn0039290|CG13654|INTRON|0;FBgn0022800|Cad96Ca|INTRON|0],TranscriptAnnot[INTRON(MODIFIER||||993|CG13654|protein_coding|CODING|FBtr0084805|1|1);INTRON(MODIFIER||||773|Cad96Ca|protein_coding|CODING|FBtr0084874|4|1)]	-
FBgn0022800	3R_21028616_SNP	A	T	0.1111	4	32	7.58e-06	0.138284	SiteClass[FBgn0022800|Cad96Ca|INTRON|0;FBgn0039290|CG13654|INTRON|0],TranscriptAnnot[INTRON(MODIFIER||||993|CG13654|protein_coding|CODING|FBtr0084805|1|1);INTRON(MODIFIER||||773|Cad96Ca|protein_coding|CODING|FBtr0084874|4|1)]	The gene Cadherin 96Ca is referred to in FlyBase by the symbol Dmel\Cad96Ca (CG10244, FBgn0022800). It is a protein_coding_gene from Drosophila melanogaster. It has one annotated transcript and one polypeptide. Gene sequence location is 3R:25197571..25208283. It has the cytological map location 96C4-96C5. Protein features are: Cadherin; Cadherin-like; Protein kinase domain; Protein kinase, ATP bi…
FBgn0039290	3R_21028616_SNP	A	T	0.1111	4	32	7.58e-06	0.138284	SiteClass[FBgn0022800|Cad96Ca|INTRON|0;FBgn0039290|CG13654|INTRON|0],TranscriptAnnot[INTRON(MODIFIER||||993|CG13654|protein_coding|CODING|FBtr0084805|1|1);INTRON(MODIFIER||||773|Cad96Ca|protein_coding|CODING|FBtr0084874|4|1)]	This gene is referred to in FlyBase by the symbol Dmel\CG13654 (FBgn0039290). It is a protein_coding_gene from Drosophila melanogaster. It has 3 annotated transcripts and 3 polypeptides (2 unique). Gene sequence location is 3R:25199818..25214255. It has the cytological map location 96C4-96C5. Protein features are: EGF-like domain; EGF-like, conserved site; Protein of unknown function DUF3522. Its…
FBtr0084805	3R_21028616_SNP	A	T	0.1111	4	32	7.58e-06	0.138284	SiteClass[FBgn0022800|Cad96Ca|INTRON|0;FBgn0039290|CG13654|INTRON|0],TranscriptAnnot[INTRON(MODIFIER||||993|CG13654|protein_coding|CODING|FBtr0084805|1|1);INTRON(MODIFIER||||773|Cad96Ca|protein_coding|CODING|FBtr0084874|4|1)]	-
FBtr0084874	3R_21028616_SNP	A	T	0.1111	4	32	7.58e-06	0.138284	SiteClass[FBgn0022800|Cad96Ca|INTRON|0;FBgn0039290|CG13654|INTRON|0],TranscriptAnnot[INTRON(MODIFIER||||993|CG13654|protein_coding|CODING|FBtr0084805|1|1);INTRON(MODIFIER||||773|Cad96Ca|protein_coding|CODING|FBtr0084874|4|1)]	-
FBgn0003090	2R_3060917_SNP	C	A	0.1111	4	32	7.87e-06	0.138284	SiteClass[FBgn0003090|pk|INTRON|0],TranscriptAnnot[INTRON(MODIFIER||||963|pk|protein_coding|CODING|FBtr0089042|1|1);INTRON(MODIFIER||||1029|pk|protein_coding|CODING|FBtr0089043|1|1)]	The gene prickle is referred to in FlyBase by the symbol Dmel\pk (CG11084, FBgn0003090). It is a protein_coding_gene from Drosophila melanogaster. It has 3 annotated transcripts and 3 polypeptides (all unique). Gene sequence location is 2R:7150703..7223378. It has the cytological map location 42F3-43A1. Protein features are: PET domain; Zinc finger, LIM-type. Its molecular function is described b…
FBtr0089042	2R_3060917_SNP	C	A	0.1111	4	32	7.87e-06	0.138284	SiteClass[FBgn0003090|pk|INTRON|0],TranscriptAnnot[INTRON(MODIFIER||||963|pk|protein_coding|CODING|FBtr0089042|1|1);INTRON(MODIFIER||||1029|pk|protein_coding|CODING|FBtr0089043|1|1)]	-
FBtr0089043	2R_3060917_SNP	C	A	0.1111	4	32	7.87e-06	0.138284	SiteClass[FBgn0003090|pk|INTRON|0],TranscriptAnnot[INTRON(MODIFIER||||963|pk|protein_coding|CODING|FBtr0089042|1|1);INTRON(MODIFIER||||1029|pk|protein_coding|CODING|FBtr0089043|1|1)]	-
FBgn0005658	3L_6096774_SNP	A	C	0.1143	4	31	7.89e-06	0.138284	SiteClass[FBgn0005658|Ets65A|SYNONYMOUS_CODING|0],TranscriptAnnot[SYNONYMOUS_CODING(LOW|SILENT|ccC/ccA|P220|490|Ets65A|protein_coding|CODING|FBtr0077054|4|1)]	The gene Ets at 65A is referred to in FlyBase by the symbol Dmel\Ets65A (CG7018, FBgn0005658). It is a protein_coding_gene from Drosophila melanogaster. It has 5 annotated transcripts and 5 polypeptides (all unique). Gene sequence location is 3L:6097617..6123913. It has the cytological map location 65A6. Protein features are: Ets domain; Winged helix-turn-helix DNA-binding domain. Its molecular f…
FBtr0077054	3L_6096774_SNP	A	C	0.1143	4	31	7.89e-06	0.138284	SiteClass[FBgn0005658|Ets65A|SYNONYMOUS_CODING|0],TranscriptAnnot[SYNONYMOUS_CODING(LOW|SILENT|ccC/ccA|P220|490|Ets65A|protein_coding|CODING|FBtr0077054|4|1)]	-
FBgn0027492	3R_23395900_SNP	G	T	0.1176	4	30	8.24e-06	0.138284	SiteClass[FBgn0027492|wdb|INTRON|0],TranscriptAnnot[INTRON(MODIFIER||||524|wdb|protein_coding|CODING|FBtr0085204|2|1);INTRON(MODIFIER||||524|wdb|protein_coding|CODING|FBtr0085209|2|1);INTRON(MODIFIER||||524|wdb|protein_coding|CODING|FBtr0085208|1|1);INTRON(MODIFIER||||524|wdb|protein_coding|CODING|FBtr0085205|1|1);INTRON(MODIFIER||||524|wdb|protein_coding|CODING|FBtr0085207|1|1);INTRON(MODIFIER||…	The gene widerborst is referred to in FlyBase by the symbol Dmel\wdb (CG5643, FBgn0027492). It is a protein_coding_gene from Drosophila melanogaster. It has 6 annotated transcripts and 6 polypeptides (1 unique). Gene sequence location is 3R:27561675..27582241. It has the cytological map location 98A6-98A8. Protein features are: Armadillo-type fold; Protein phosphatase 2A, regulatory B subunit, B5…
FBtr0085204	3R_23395900_SNP	G	T	0.1176	4	30	8.24e-06	0.138284	SiteClass[FBgn0027492|wdb|INTRON|0],TranscriptAnnot[INTRON(MODIFIER||||524|wdb|protein_coding|CODING|FBtr0085204|2|1);INTRON(MODIFIER||||524|wdb|protein_coding|CODING|FBtr0085209|2|1);INTRON(MODIFIER||||524|wdb|protein_coding|CODING|FBtr0085208|1|1);INTRON(MODIFIER||||524|wdb|protein_coding|CODING|FBtr0085205|1|1);INTRON(MODIFIER||||524|wdb|protein_coding|CODING|FBtr0085207|1|1);INTRON(MODIFIER||…	-
FBtr0085209	3R_23395900_SNP	G	T	0.1176	4	30	8.24e-06	0.138284	SiteClass[FBgn0027492|wdb|INTRON|0],TranscriptAnnot[INTRON(MODIFIER||||524|wdb|protein_coding|CODING|FBtr0085204|2|1);INTRON(MODIFIER||||524|wdb|protein_coding|CODING|FBtr0085209|2|1);INTRON(MODIFIER||||524|wdb|protein_coding|CODING|FBtr0085208|1|1);INTRON(MODIFIER||||524|wdb|protein_coding|CODING|FBtr0085205|1|1);INTRON(MODIFIER||||524|wdb|protein_coding|CODING|FBtr0085207|1|1);INTRON(MODIFIER||…	-
FBtr0085208	3R_23395900_SNP	G	T	0.1176	4	30	8.24e-06	0.138284	SiteClass[FBgn0027492|wdb|INTRON|0],TranscriptAnnot[INTRON(MODIFIER||||524|wdb|protein_coding|CODING|FBtr0085204|2|1);INTRON(MODIFIER||||524|wdb|protein_coding|CODING|FBtr0085209|2|1);INTRON(MODIFIER||||524|wdb|protein_coding|CODING|FBtr0085208|1|1);INTRON(MODIFIER||||524|wdb|protein_coding|CODING|FBtr0085205|1|1);INTRON(MODIFIER||||524|wdb|protein_coding|CODING|FBtr0085207|1|1);INTRON(MODIFIER||…	-
FBtr0085205	3R_23395900_SNP	G	T	0.1176	4	30	8.24e-06	0.138284	SiteClass[FBgn0027492|wdb|INTRON|0],TranscriptAnnot[INTRON(MODIFIER||||524|wdb|protein_coding|CODING|FBtr0085204|2|1);INTRON(MODIFIER||||524|wdb|protein_coding|CODING|FBtr0085209|2|1);INTRON(MODIFIER||||524|wdb|protein_coding|CODING|FBtr0085208|1|1);INTRON(MODIFIER||||524|wdb|protein_coding|CODING|FBtr0085205|1|1);INTRON(MODIFIER||||524|wdb|protein_coding|CODING|FBtr0085207|1|1);INTRON(MODIFIER||…	-
FBtr0085207	3R_23395900_SNP	G	T	0.1176	4	30	8.24e-06	0.138284	SiteClass[FBgn0027492|wdb|INTRON|0],TranscriptAnnot[INTRON(MODIFIER||||524|wdb|protein_coding|CODING|FBtr0085204|2|1);INTRON(MODIFIER||||524|wdb|protein_coding|CODING|FBtr0085209|2|1);INTRON(MODIFIER||||524|wdb|protein_coding|CODING|FBtr0085208|1|1);INTRON(MODIFIER||||524|wdb|protein_coding|CODING|FBtr0085205|1|1);INTRON(MODIFIER||||524|wdb|protein_coding|CODING|FBtr0085207|1|1);INTRON(MODIFIER||…	-
FBtr0085203	3R_23395900_SNP	G	T	0.1176	4	30	8.24e-06	0.138284	SiteClass[FBgn0027492|wdb|INTRON|0],TranscriptAnnot[INTRON(MODIFIER||||524|wdb|protein_coding|CODING|FBtr0085204|2|1);INTRON(MODIFIER||||524|wdb|protein_coding|CODING|FBtr0085209|2|1);INTRON(MODIFIER||||524|wdb|protein_coding|CODING|FBtr0085208|1|1);INTRON(MODIFIER||||524|wdb|protein_coding|CODING|FBtr0085205|1|1);INTRON(MODIFIER||||524|wdb|protein_coding|CODING|FBtr0085207|1|1);INTRON(MODIFIER||…	-
FBgn0039510	3R_23143713_SNP	A	G	0.1176	4	30	8.34e-06	0.138284	SiteClass[FBgn0039510|CG3339|SYNONYMOUS_CODING|0;FBgn0265314|CR44287|UPSTREAM|337],TranscriptAnnot[SYNONYMOUS_CODING(LOW|SILENT|ctC/ctT|L842|4842|CG3339|protein_coding|CODING|FBtr0273192|7|1);UPSTREAM(MODIFIER||337|||CR44287|ncRNA|NON_CODING|FBtr0339323||1)]	This gene is referred to in FlyBase by the symbol Dmel\CG3339 (FBgn0039510). It is a protein_coding_gene from Drosophila melanogaster. It has one annotated transcript and one polypeptide. Gene sequence location is 3R:27294286..27322325. It has the cytological map location 97F1-97F2. Protein features are: ATPase, dynein-related, AAA domain; Dynein heavy chain; Dynein heavy chain domain; Dynein hea…
FBgn0265314	3R_23143713_SNP	A	G	0.1176	4	30	8.34e-06	0.138284	SiteClass[FBgn0039510|CG3339|SYNONYMOUS_CODING|0;FBgn0265314|CR44287|UPSTREAM|337],TranscriptAnnot[SYNONYMOUS_CODING(LOW|SILENT|ctC/ctT|L842|4842|CG3339|protein_coding|CODING|FBtr0273192|7|1);UPSTREAM(MODIFIER||337|||CR44287|ncRNA|NON_CODING|FBtr0339323||1)]	This gene is referred to in FlyBase by the symbol Dmel\CR44287 (FBgn0265314). It is a non_protein_coding_gene from Drosophila melanogaster. It has one annotated transcript. Gene sequence location is 3R:27318328..27319246. It has the cytological map location 97F2. Its molecular function is unknown. The biological processes in which it is involved are not known. No alleles are reported.
FBtr0273192	3R_23143713_SNP	A	G	0.1176	4	30	8.34e-06	0.138284	SiteClass[FBgn0039510|CG3339|SYNONYMOUS_CODING|0;FBgn0265314|CR44287|UPSTREAM|337],TranscriptAnnot[SYNONYMOUS_CODING(LOW|SILENT|ctC/ctT|L842|4842|CG3339|protein_coding|CODING|FBtr0273192|7|1);UPSTREAM(MODIFIER||337|||CR44287|ncRNA|NON_CODING|FBtr0339323||1)]	-
FBtr0339323	3R_23143713_SNP	A	G	0.1176	4	30	8.34e-06	0.138284	SiteClass[FBgn0039510|CG3339|SYNONYMOUS_CODING|0;FBgn0265314|CR44287|UPSTREAM|337],TranscriptAnnot[SYNONYMOUS_CODING(LOW|SILENT|ctC/ctT|L842|4842|CG3339|protein_coding|CODING|FBtr0273192|7|1);UPSTREAM(MODIFIER||337|||CR44287|ncRNA|NON_CODING|FBtr0339323||1)]	-
FBgn0035625	3L_5629919_SNP	G	A	0.1081	4	33	8.5e-06	0.138284	SiteClass[FBgn0035625|Blimp-1|INTRON|0],TranscriptAnnot[INTRON(MODIFIER||||1203|Blimp-1|protein_coding|CODING|FBtr0077089|1|1);INTRON(MODIFIER||||1216|Blimp-1|protein_coding|CODING|FBtr0331806|1|1);INTRON(MODIFIER||||1203|Blimp-1|protein_coding|CODING|FBtr0345593|1|1);INTRON(MODIFIER||||1216|Blimp-1|protein_coding|CODING|FBtr0331807|1|1)]	The gene Blimp-1 is referred to in FlyBase by the symbol Dmel\Blimp-1 (CG5249, FBgn0035625). It is a protein_coding_gene from Drosophila melanogaster. It has 6 annotated transcripts and 6 polypeptides (2 unique). Gene sequence location is 3L:5630983..5652094. It has the cytological map location 64E1. Protein features are: SET domain; Zinc finger C2H2-type/integrase DNA-binding domain; Zinc finger…
FBtr0077089	3L_5629919_SNP	G	A	0.1081	4	33	8.5e-06	0.138284	SiteClass[FBgn0035625|Blimp-1|INTRON|0],TranscriptAnnot[INTRON(MODIFIER||||1203|Blimp-1|protein_coding|CODING|FBtr0077089|1|1);INTRON(MODIFIER||||1216|Blimp-1|protein_coding|CODING|FBtr0331806|1|1);INTRON(MODIFIER||||1203|Blimp-1|protein_coding|CODING|FBtr0345593|1|1);INTRON(MODIFIER||||1216|Blimp-1|protein_coding|CODING|FBtr0331807|1|1)]	-
FBtr0331806	3L_5629919_SNP	G	A	0.1081	4	33	8.5e-06	0.138284	SiteClass[FBgn0035625|Blimp-1|INTRON|0],TranscriptAnnot[INTRON(MODIFIER||||1203|Blimp-1|protein_coding|CODING|FBtr0077089|1|1);INTRON(MODIFIER||||1216|Blimp-1|protein_coding|CODING|FBtr0331806|1|1);INTRON(MODIFIER||||1203|Blimp-1|protein_coding|CODING|FBtr0345593|1|1);INTRON(MODIFIER||||1216|Blimp-1|protein_coding|CODING|FBtr0331807|1|1)]	-
FBtr0345593	3L_5629919_SNP	G	A	0.1081	4	33	8.5e-06	0.138284	SiteClass[FBgn0035625|Blimp-1|INTRON|0],TranscriptAnnot[INTRON(MODIFIER||||1203|Blimp-1|protein_coding|CODING|FBtr0077089|1|1);INTRON(MODIFIER||||1216|Blimp-1|protein_coding|CODING|FBtr0331806|1|1);INTRON(MODIFIER||||1203|Blimp-1|protein_coding|CODING|FBtr0345593|1|1);INTRON(MODIFIER||||1216|Blimp-1|protein_coding|CODING|FBtr0331807|1|1)]	-
FBtr0331807	3L_5629919_SNP	G	A	0.1081	4	33	8.5e-06	0.138284	SiteClass[FBgn0035625|Blimp-1|INTRON|0],TranscriptAnnot[INTRON(MODIFIER||||1203|Blimp-1|protein_coding|CODING|FBtr0077089|1|1);INTRON(MODIFIER||||1216|Blimp-1|protein_coding|CODING|FBtr0331806|1|1);INTRON(MODIFIER||||1203|Blimp-1|protein_coding|CODING|FBtr0345593|1|1);INTRON(MODIFIER||||1216|Blimp-1|protein_coding|CODING|FBtr0331807|1|1)]	-
FBgn0004592	3L_15647482_SNP	G	T	0.1429	5	30	8.52e-06	0.138284	SiteClass[FBgn0004592|Eig71Ee|DOWNSTREAM|90],TranscriptAnnot[DOWNSTREAM(MODIFIER||90||445|Eig71Ee|protein_coding|CODING|FBtr0075585||1);INTERGENIC(MODIFIER||||||||||1)]	The gene Ecdysone-induced gene 71Ee is referred to in FlyBase by the symbol Dmel\Eig71Ee (CG7604, FBgn0004592). It is a protein_coding_gene from Drosophila melanogaster. It has one annotated transcript and one polypeptide. Gene sequence location is 3L:15654472..15656010. It has the cytological map location 71E5. Its molecular function is described by: structural molecule activity. It is involved …
FBtr0075585	3L_15647482_SNP	G	T	0.1429	5	30	8.52e-06	0.138284	SiteClass[FBgn0004592|Eig71Ee|DOWNSTREAM|90],TranscriptAnnot[DOWNSTREAM(MODIFIER||90||445|Eig71Ee|protein_coding|CODING|FBtr0075585||1);INTERGENIC(MODIFIER||||||||||1)]	-
FBgn0085370	2L_18587275_SNP	G	T	0.1143	4	31	8.02e-06	0.138284	SiteClass[FBgn0085370|Pde11|INTRON|0],TranscriptAnnot[INTRON(MODIFIER||||1407|Pde11|protein_coding|CODING|FBtr0343831|2|1)]	The gene Phosphodiesterase 11 is referred to in FlyBase by the symbol Dmel\Pde11 (CG34341, FBgn0085370). It is a protein_coding_gene from Drosophila melanogaster. It has 6 annotated transcripts and 6 polypeptides (4 unique). Gene sequence location is 2L:18532025..18590342. It has the cytological map location 36F6. Protein features are: 3'5'-cyclic nucleotide phosphodiesterase; 3'5'-cyclic nucleot…
FBtr0343831	2L_18587275_SNP	G	T	0.1143	4	31	8.02e-06	0.138284	SiteClass[FBgn0085370|Pde11|INTRON|0],TranscriptAnnot[INTRON(MODIFIER||||1407|Pde11|protein_coding|CODING|FBtr0343831|2|1)]	-
FBgn0031568	2L_3730279_SNP	A	C	0.125	4	28	5.33e-06	0.138284	SiteClass[FBgn0031568|CG10019|UPSTREAM|187],TranscriptAnnot[UPSTREAM(MODIFIER||187||1104|CG10019|protein_coding|CODING|FBtr0321291||1);INTERGENIC(MODIFIER||||||||||1)]	This gene is referred to in FlyBase by the symbol Dmel\CG10019 (FBgn0031568). It is a protein_coding_gene from Drosophila melanogaster. It has 2 annotated transcripts and 2 polypeptides (1 unique). Gene sequence location is 2L:3730466..3754617. It has the cytological map location 24C2-24C3. Protein features are: Major facilitator superfamily; Major facilitator superfamily domain. Its molecular fu…
FBtr0321291	2L_3730279_SNP	A	C	0.125	4	28	5.33e-06	0.138284	SiteClass[FBgn0031568|CG10019|UPSTREAM|187],TranscriptAnnot[UPSTREAM(MODIFIER||187||1104|CG10019|protein_coding|CODING|FBtr0321291||1);INTERGENIC(MODIFIER||||||||||1)]	-
FBgn0003090	2R_3060916_SNP	T	G	0.1176	4	30	7.85e-06	0.138284	SiteClass[FBgn0003090|pk|INTRON|0],TranscriptAnnot[INTRON(MODIFIER||||963|pk|protein_coding|CODING|FBtr0089042|1|1);INTRON(MODIFIER||||1029|pk|protein_coding|CODING|FBtr0089043|1|1)]	The gene prickle is referred to in FlyBase by the symbol Dmel\pk (CG11084, FBgn0003090). It is a protein_coding_gene from Drosophila melanogaster. It has 3 annotated transcripts and 3 polypeptides (all unique). Gene sequence location is 2R:7150703..7223378. It has the cytological map location 42F3-43A1. Protein features are: PET domain; Zinc finger, LIM-type. Its molecular function is described b…
FBtr0089042	2R_3060916_SNP	T	G	0.1176	4	30	7.85e-06	0.138284	SiteClass[FBgn0003090|pk|INTRON|0],TranscriptAnnot[INTRON(MODIFIER||||963|pk|protein_coding|CODING|FBtr0089042|1|1);INTRON(MODIFIER||||1029|pk|protein_coding|CODING|FBtr0089043|1|1)]	-
FBtr0089043	2R_3060916_SNP	T	G	0.1176	4	30	7.85e-06	0.138284	SiteClass[FBgn0003090|pk|INTRON|0],TranscriptAnnot[INTRON(MODIFIER||||963|pk|protein_coding|CODING|FBtr0089042|1|1);INTRON(MODIFIER||||1029|pk|protein_coding|CODING|FBtr0089043|1|1)]	-
FBgn0023524	X_2151613_SNP	T	C	0.1081	4	33	8.42e-06	0.138284	SiteClass[FBgn0023524|CG3078|INTRON|0],TranscriptAnnot[INTRON(MODIFIER||||743|CG3078|protein_coding|CODING|FBtr0070415|3|1);INTRON(MODIFIER||||744|CG3078|protein_coding|CODING|FBtr0340208|3|1)]	This gene is referred to in FlyBase by the symbol Dmel\CG3078 (FBgn0023524). It is a protein_coding_gene from Drosophila melanogaster. It has 2 annotated transcripts and 2 polypeptides (all unique). Gene sequence location is X:2254403..2259863. It has the cytological map location 2F2. Protein features are: Major facilitator superfamily domain. Its molecular function is described by: . It is invol…
FBtr0070415	X_2151613_SNP	T	C	0.1081	4	33	8.42e-06	0.138284	SiteClass[FBgn0023524|CG3078|INTRON|0],TranscriptAnnot[INTRON(MODIFIER||||743|CG3078|protein_coding|CODING|FBtr0070415|3|1);INTRON(MODIFIER||||744|CG3078|protein_coding|CODING|FBtr0340208|3|1)]	-
FBtr0340208	X_2151613_SNP	T	C	0.1081	4	33	8.42e-06	0.138284	SiteClass[FBgn0023524|CG3078|INTRON|0],TranscriptAnnot[INTRON(MODIFIER||||743|CG3078|protein_coding|CODING|FBtr0070415|3|1);INTRON(MODIFIER||||744|CG3078|protein_coding|CODING|FBtr0340208|3|1)]	-
FBgn0004359	3R_22715296_SNP	A	T	0.1143	4	31	2.08e-06	0.138284	SiteClass[FBgn0004359|T48|INTRON|0],TranscriptAnnot[INTRON(MODIFIER||||419|T48|protein_coding|CODING|FBtr0085065|2|1);INTRON(MODIFIER||||419|T48|protein_coding|CODING|FBtr0336724|2|1)]	The gene Transcript 48 is referred to in FlyBase by the symbol Dmel\T48 (CG5507, FBgn0004359). It is a protein_coding_gene from Drosophila melanogaster. It has 2 annotated transcripts and 2 polypeptides (1 unique). Gene sequence location is 3R:26881734..26910997. It has the cytological map location 97D5-97D7. Protein features are: Growth factor receptor cysteine-rich domain. Its molecular functio…
FBtr0085065	3R_22715296_SNP	A	T	0.1143	4	31	2.08e-06	0.138284	SiteClass[FBgn0004359|T48|INTRON|0],TranscriptAnnot[INTRON(MODIFIER||||419|T48|protein_coding|CODING|FBtr0085065|2|1);INTRON(MODIFIER||||419|T48|protein_coding|CODING|FBtr0336724|2|1)]	-
FBtr0336724	3R_22715296_SNP	A	T	0.1143	4	31	2.08e-06	0.138284	SiteClass[FBgn0004359|T48|INTRON|0],TranscriptAnnot[INTRON(MODIFIER||||419|T48|protein_coding|CODING|FBtr0085065|2|1);INTRON(MODIFIER||||419|T48|protein_coding|CODING|FBtr0336724|2|1)]	-
FBgn0039031	3R_18803956_SNP	A	C	0.1143	4	31	7.45e-06	0.138284	SiteClass[FBgn0039031|CG17244|DOWNSTREAM|70],TranscriptAnnot[DOWNSTREAM(MODIFIER||332||159|CG17244|protein_coding|CODING|FBtr0084340||1);DOWNSTREAM(MODIFIER||70||159|CG17244|protein_coding|CODING|FBtr0339164||1);INTERGENIC(MODIFIER||||||||||1)]	This gene is referred to in FlyBase by the symbol Dmel\CG17244 (FBgn0039031). It is a protein_coding_gene from Drosophila melanogaster. It has 2 annotated transcripts and 2 polypeptides (1 unique). Gene sequence location is 3R:22977270..22978164. It has the cytological map location 94D6. Its molecular function is described by: cytokine activity. It is involved in the biological process described …
FBtr0084340	3R_18803956_SNP	A	C	0.1143	4	31	7.45e-06	0.138284	SiteClass[FBgn0039031|CG17244|DOWNSTREAM|70],TranscriptAnnot[DOWNSTREAM(MODIFIER||332||159|CG17244|protein_coding|CODING|FBtr0084340||1);DOWNSTREAM(MODIFIER||70||159|CG17244|protein_coding|CODING|FBtr0339164||1);INTERGENIC(MODIFIER||||||||||1)]	-
FBtr0339164	3R_18803956_SNP	A	C	0.1143	4	31	7.45e-06	0.138284	SiteClass[FBgn0039031|CG17244|DOWNSTREAM|70],TranscriptAnnot[DOWNSTREAM(MODIFIER||332||159|CG17244|protein_coding|CODING|FBtr0084340||1);DOWNSTREAM(MODIFIER||70||159|CG17244|protein_coding|CODING|FBtr0339164||1);INTERGENIC(MODIFIER||||||||||1)]	-
FBgn0260943	3L_17132968_SNP	T	C	0.1111	4	32	7.18e-06	0.138284	SiteClass[FBgn0260943|Rbp6|INTRON|0],TranscriptAnnot[INTRON(MODIFIER||||257|Rbp6|protein_coding|CODING|FBtr0113428|1|1);INTRON(MODIFIER||||162|Rbp6|protein_coding|CODING|FBtr0290066|1|1);INTRON(MODIFIER||||259|Rbp6|protein_coding|CODING|FBtr0310005|1|1);INTRON(MODIFIER||||225|Rbp6|protein_coding|CODING|FBtr0310006|1|1);INTRON(MODIFIER||||369|Rbp6|protein_coding|CODING|FBtr0075285|6|1);INTRON(MODI…	The gene RNA-binding protein 6 is referred to in FlyBase by the symbol Dmel\Rbp6 (CG32169, FBgn0260943). It is a protein_coding_gene from Drosophila melanogaster. It has 7 annotated transcripts and 7 polypeptides (all unique). Gene sequence location is 3L:17058774..17238212. It has the cytological map location 73E5-74A1. Protein features are: Nucleotide-binding alpha-beta plait domain; RNA recogn…
FBtr0113428	3L_17132968_SNP	T	C	0.1111	4	32	7.18e-06	0.138284	SiteClass[FBgn0260943|Rbp6|INTRON|0],TranscriptAnnot[INTRON(MODIFIER||||257|Rbp6|protein_coding|CODING|FBtr0113428|1|1);INTRON(MODIFIER||||162|Rbp6|protein_coding|CODING|FBtr0290066|1|1);INTRON(MODIFIER||||259|Rbp6|protein_coding|CODING|FBtr0310005|1|1);INTRON(MODIFIER||||225|Rbp6|protein_coding|CODING|FBtr0310006|1|1);INTRON(MODIFIER||||369|Rbp6|protein_coding|CODING|FBtr0075285|6|1);INTRON(MODI…	-
FBtr0290066	3L_17132968_SNP	T	C	0.1111	4	32	7.18e-06	0.138284	SiteClass[FBgn0260943|Rbp6|INTRON|0],TranscriptAnnot[INTRON(MODIFIER||||257|Rbp6|protein_coding|CODING|FBtr0113428|1|1);INTRON(MODIFIER||||162|Rbp6|protein_coding|CODING|FBtr0290066|1|1);INTRON(MODIFIER||||259|Rbp6|protein_coding|CODING|FBtr0310005|1|1);INTRON(MODIFIER||||225|Rbp6|protein_coding|CODING|FBtr0310006|1|1);INTRON(MODIFIER||||369|Rbp6|protein_coding|CODING|FBtr0075285|6|1);INTRON(MODI…	-
FBtr0310005	3L_17132968_SNP	T	C	0.1111	4	32	7.18e-06	0.138284	SiteClass[FBgn0260943|Rbp6|INTRON|0],TranscriptAnnot[INTRON(MODIFIER||||257|Rbp6|protein_coding|CODING|FBtr0113428|1|1);INTRON(MODIFIER||||162|Rbp6|protein_coding|CODING|FBtr0290066|1|1);INTRON(MODIFIER||||259|Rbp6|protein_coding|CODING|FBtr0310005|1|1);INTRON(MODIFIER||||225|Rbp6|protein_coding|CODING|FBtr0310006|1|1);INTRON(MODIFIER||||369|Rbp6|protein_coding|CODING|FBtr0075285|6|1);INTRON(MODI…	-
FBtr0310006	3L_17132968_SNP	T	C	0.1111	4	32	7.18e-06	0.138284	SiteClass[FBgn0260943|Rbp6|INTRON|0],TranscriptAnnot[INTRON(MODIFIER||||257|Rbp6|protein_coding|CODING|FBtr0113428|1|1);INTRON(MODIFIER||||162|Rbp6|protein_coding|CODING|FBtr0290066|1|1);INTRON(MODIFIER||||259|Rbp6|protein_coding|CODING|FBtr0310005|1|1);INTRON(MODIFIER||||225|Rbp6|protein_coding|CODING|FBtr0310006|1|1);INTRON(MODIFIER||||369|Rbp6|protein_coding|CODING|FBtr0075285|6|1);INTRON(MODI…	-
FBtr0075285	3L_17132968_SNP	T	C	0.1111	4	32	7.18e-06	0.138284	SiteClass[FBgn0260943|Rbp6|INTRON|0],TranscriptAnnot[INTRON(MODIFIER||||257|Rbp6|protein_coding|CODING|FBtr0113428|1|1);INTRON(MODIFIER||||162|Rbp6|protein_coding|CODING|FBtr0290066|1|1);INTRON(MODIFIER||||259|Rbp6|protein_coding|CODING|FBtr0310005|1|1);INTRON(MODIFIER||||225|Rbp6|protein_coding|CODING|FBtr0310006|1|1);INTRON(MODIFIER||||369|Rbp6|protein_coding|CODING|FBtr0075285|6|1);INTRON(MODI…	-
FBtr0113427	3L_17132968_SNP	T	C	0.1111	4	32	7.18e-06	0.138284	SiteClass[FBgn0260943|Rbp6|INTRON|0],TranscriptAnnot[INTRON(MODIFIER||||257|Rbp6|protein_coding|CODING|FBtr0113428|1|1);INTRON(MODIFIER||||162|Rbp6|protein_coding|CODING|FBtr0290066|1|1);INTRON(MODIFIER||||259|Rbp6|protein_coding|CODING|FBtr0310005|1|1);INTRON(MODIFIER||||225|Rbp6|protein_coding|CODING|FBtr0310006|1|1);INTRON(MODIFIER||||369|Rbp6|protein_coding|CODING|FBtr0075285|6|1);INTRON(MODI…	-
FBtr0333861	3L_17132968_SNP	T	C	0.1111	4	32	7.18e-06	0.138284	SiteClass[FBgn0260943|Rbp6|INTRON|0],TranscriptAnnot[INTRON(MODIFIER||||257|Rbp6|protein_coding|CODING|FBtr0113428|1|1);INTRON(MODIFIER||||162|Rbp6|protein_coding|CODING|FBtr0290066|1|1);INTRON(MODIFIER||||259|Rbp6|protein_coding|CODING|FBtr0310005|1|1);INTRON(MODIFIER||||225|Rbp6|protein_coding|CODING|FBtr0310006|1|1);INTRON(MODIFIER||||369|Rbp6|protein_coding|CODING|FBtr0075285|6|1);INTRON(MODI…	-
FBgn0016694	3L_7834182_SNP	A	G	0.1081	4	33	8.22e-06	0.138284	SiteClass[FBgn0016694|Pdp1|INTRON|0],TranscriptAnnot[INTRON(MODIFIER||||270|Pdp1|protein_coding|CODING|FBtr0076776|1|1);INTRON(MODIFIER||||232|Pdp1|protein_coding|CODING|FBtr0300499|2|1);INTRON(MODIFIER||||270|Pdp1|protein_coding|CODING|FBtr0306535|2|1);INTRON(MODIFIER||||275|Pdp1|protein_coding|CODING|FBtr0332081|1|1);INTRON(MODIFIER||||270|Pdp1|protein_coding|CODING|FBtr0346536|2|1);INTRON(MODI…	The gene PAR-domain protein 1 is referred to in FlyBase by the symbol Dmel\Pdp1 (CG17888, FBgn0016694). It is a protein_coding_gene from Drosophila melanogaster. It has 13 annotated transcripts and 13 polypeptides (11 unique). Gene sequence location is 3L:7811458..7867369. It has the cytological map location 66A14-66A17. Protein features are: Basic-leucine zipper domain. Its molecular function is…
FBtr0076776	3L_7834182_SNP	A	G	0.1081	4	33	8.22e-06	0.138284	SiteClass[FBgn0016694|Pdp1|INTRON|0],TranscriptAnnot[INTRON(MODIFIER||||270|Pdp1|protein_coding|CODING|FBtr0076776|1|1);INTRON(MODIFIER||||232|Pdp1|protein_coding|CODING|FBtr0300499|2|1);INTRON(MODIFIER||||270|Pdp1|protein_coding|CODING|FBtr0306535|2|1);INTRON(MODIFIER||||275|Pdp1|protein_coding|CODING|FBtr0332081|1|1);INTRON(MODIFIER||||270|Pdp1|protein_coding|CODING|FBtr0346536|2|1);INTRON(MODI…	-
FBtr0300499	3L_7834182_SNP	A	G	0.1081	4	33	8.22e-06	0.138284	SiteClass[FBgn0016694|Pdp1|INTRON|0],TranscriptAnnot[INTRON(MODIFIER||||270|Pdp1|protein_coding|CODING|FBtr0076776|1|1);INTRON(MODIFIER||||232|Pdp1|protein_coding|CODING|FBtr0300499|2|1);INTRON(MODIFIER||||270|Pdp1|protein_coding|CODING|FBtr0306535|2|1);INTRON(MODIFIER||||275|Pdp1|protein_coding|CODING|FBtr0332081|1|1);INTRON(MODIFIER||||270|Pdp1|protein_coding|CODING|FBtr0346536|2|1);INTRON(MODI…	-
FBtr0306535	3L_7834182_SNP	A	G	0.1081	4	33	8.22e-06	0.138284	SiteClass[FBgn0016694|Pdp1|INTRON|0],TranscriptAnnot[INTRON(MODIFIER||||270|Pdp1|protein_coding|CODING|FBtr0076776|1|1);INTRON(MODIFIER||||232|Pdp1|protein_coding|CODING|FBtr0300499|2|1);INTRON(MODIFIER||||270|Pdp1|protein_coding|CODING|FBtr0306535|2|1);INTRON(MODIFIER||||275|Pdp1|protein_coding|CODING|FBtr0332081|1|1);INTRON(MODIFIER||||270|Pdp1|protein_coding|CODING|FBtr0346536|2|1);INTRON(MODI…	-
FBtr0332081	3L_7834182_SNP	A	G	0.1081	4	33	8.22e-06	0.138284	SiteClass[FBgn0016694|Pdp1|INTRON|0],TranscriptAnnot[INTRON(MODIFIER||||270|Pdp1|protein_coding|CODING|FBtr0076776|1|1);INTRON(MODIFIER||||232|Pdp1|protein_coding|CODING|FBtr0300499|2|1);INTRON(MODIFIER||||270|Pdp1|protein_coding|CODING|FBtr0306535|2|1);INTRON(MODIFIER||||275|Pdp1|protein_coding|CODING|FBtr0332081|1|1);INTRON(MODIFIER||||270|Pdp1|protein_coding|CODING|FBtr0346536|2|1);INTRON(MODI…	-
FBtr0346536	3L_7834182_SNP	A	G	0.1081	4	33	8.22e-06	0.138284	SiteClass[FBgn0016694|Pdp1|INTRON|0],TranscriptAnnot[INTRON(MODIFIER||||270|Pdp1|protein_coding|CODING|FBtr0076776|1|1);INTRON(MODIFIER||||232|Pdp1|protein_coding|CODING|FBtr0300499|2|1);INTRON(MODIFIER||||270|Pdp1|protein_coding|CODING|FBtr0306535|2|1);INTRON(MODIFIER||||275|Pdp1|protein_coding|CODING|FBtr0332081|1|1);INTRON(MODIFIER||||270|Pdp1|protein_coding|CODING|FBtr0346536|2|1);INTRON(MODI…	-
FBtr0076775	3L_7834182_SNP	A	G	0.1081	4	33	8.22e-06	0.138284	SiteClass[FBgn0016694|Pdp1|INTRON|0],TranscriptAnnot[INTRON(MODIFIER||||270|Pdp1|protein_coding|CODING|FBtr0076776|1|1);INTRON(MODIFIER||||232|Pdp1|protein_coding|CODING|FBtr0300499|2|1);INTRON(MODIFIER||||270|Pdp1|protein_coding|CODING|FBtr0306535|2|1);INTRON(MODIFIER||||275|Pdp1|protein_coding|CODING|FBtr0332081|1|1);INTRON(MODIFIER||||270|Pdp1|protein_coding|CODING|FBtr0346536|2|1);INTRON(MODI…	-
FBtr0076777	3L_7834182_SNP	A	G	0.1081	4	33	8.22e-06	0.138284	SiteClass[FBgn0016694|Pdp1|INTRON|0],TranscriptAnnot[INTRON(MODIFIER||||270|Pdp1|protein_coding|CODING|FBtr0076776|1|1);INTRON(MODIFIER||||232|Pdp1|protein_coding|CODING|FBtr0300499|2|1);INTRON(MODIFIER||||270|Pdp1|protein_coding|CODING|FBtr0306535|2|1);INTRON(MODIFIER||||275|Pdp1|protein_coding|CODING|FBtr0332081|1|1);INTRON(MODIFIER||||270|Pdp1|protein_coding|CODING|FBtr0346536|2|1);INTRON(MODI…	-
FBtr0332082	3L_7834182_SNP	A	G	0.1081	4	33	8.22e-06	0.138284	SiteClass[FBgn0016694|Pdp1|INTRON|0],TranscriptAnnot[INTRON(MODIFIER||||270|Pdp1|protein_coding|CODING|FBtr0076776|1|1);INTRON(MODIFIER||||232|Pdp1|protein_coding|CODING|FBtr0300499|2|1);INTRON(MODIFIER||||270|Pdp1|protein_coding|CODING|FBtr0306535|2|1);INTRON(MODIFIER||||275|Pdp1|protein_coding|CODING|FBtr0332081|1|1);INTRON(MODIFIER||||270|Pdp1|protein_coding|CODING|FBtr0346536|2|1);INTRON(MODI…	-
FBtr0332083	3L_7834182_SNP	A	G	0.1081	4	33	8.22e-06	0.138284	SiteClass[FBgn0016694|Pdp1|INTRON|0],TranscriptAnnot[INTRON(MODIFIER||||270|Pdp1|protein_coding|CODING|FBtr0076776|1|1);INTRON(MODIFIER||||232|Pdp1|protein_coding|CODING|FBtr0300499|2|1);INTRON(MODIFIER||||270|Pdp1|protein_coding|CODING|FBtr0306535|2|1);INTRON(MODIFIER||||275|Pdp1|protein_coding|CODING|FBtr0332081|1|1);INTRON(MODIFIER||||270|Pdp1|protein_coding|CODING|FBtr0346536|2|1);INTRON(MODI…	-
FBgn0031568	2L_3742636_SNP	T	G	0.1143	4	31	5.6e-06	0.138284	SiteClass[FBgn0031568|CG10019|INTRON|0],TranscriptAnnot[INTRON(MODIFIER||||1104|CG10019|protein_coding|CODING|FBtr0321291|1|1)]	This gene is referred to in FlyBase by the symbol Dmel\CG10019 (FBgn0031568). It is a protein_coding_gene from Drosophila melanogaster. It has 2 annotated transcripts and 2 polypeptides (1 unique). Gene sequence location is 2L:3730466..3754617. It has the cytological map location 24C2-24C3. Protein features are: Major facilitator superfamily; Major facilitator superfamily domain. Its molecular fu…
FBtr0321291	2L_3742636_SNP	T	G	0.1143	4	31	5.6e-06	0.138284	SiteClass[FBgn0031568|CG10019|INTRON|0],TranscriptAnnot[INTRON(MODIFIER||||1104|CG10019|protein_coding|CODING|FBtr0321291|1|1)]	-
FBgn0005658	3L_6097046_SNP	A	T	0.1143	4	31	6.65e-06	0.138284	SiteClass[FBgn0005658|Ets65A|INTRON|0],TranscriptAnnot[INTRON(MODIFIER||||490|Ets65A|protein_coding|CODING|FBtr0077054|4|1)]	The gene Ets at 65A is referred to in FlyBase by the symbol Dmel\Ets65A (CG7018, FBgn0005658). It is a protein_coding_gene from Drosophila melanogaster. It has 5 annotated transcripts and 5 polypeptides (all unique). Gene sequence location is 3L:6097617..6123913. It has the cytological map location 65A6. Protein features are: Ets domain; Winged helix-turn-helix DNA-binding domain. Its molecular f…
FBtr0077054	3L_6097046_SNP	A	T	0.1143	4	31	6.65e-06	0.138284	SiteClass[FBgn0005658|Ets65A|INTRON|0],TranscriptAnnot[INTRON(MODIFIER||||490|Ets65A|protein_coding|CODING|FBtr0077054|4|1)]	-
FBgn0039632	3R_24886672_SNP	C	T	0.1351	5	32	4.51e-06	0.138284	SiteClass[FBgn0039632|Cul5|SYNONYMOUS_CODING|0],TranscriptAnnot[SYNONYMOUS_CODING(LOW|SILENT|gaA/gaG|E581|852|Cul5|protein_coding|CODING|FBtr0085417|4|1)]	The gene Cullin 5 is referred to in FlyBase by the symbol Dmel\Cul5 (CG1401, FBgn0039632). It is a protein_coding_gene from Drosophila melanogaster. It has one annotated transcript and one polypeptide. Gene sequence location is 3R:29059272..29062975. It has the cytological map location 98F6. Protein features are: Cullin homology; Cullin protein, neddylation domain; Cullin repeat-like-containing d…
FBtr0085417	3R_24886672_SNP	C	T	0.1351	5	32	4.51e-06	0.138284	SiteClass[FBgn0039632|Cul5|SYNONYMOUS_CODING|0],TranscriptAnnot[SYNONYMOUS_CODING(LOW|SILENT|gaA/gaG|E581|852|Cul5|protein_coding|CODING|FBtr0085417|4|1)]	-
FBgn0260943	3L_17132993_SNP	T	G	0.1111	4	32	3.82e-06	0.138284	SiteClass[FBgn0260943|Rbp6|INTRON|0],TranscriptAnnot[INTRON(MODIFIER||||257|Rbp6|protein_coding|CODING|FBtr0113428|1|1);INTRON(MODIFIER||||162|Rbp6|protein_coding|CODING|FBtr0290066|1|1);INTRON(MODIFIER||||259|Rbp6|protein_coding|CODING|FBtr0310005|1|1);INTRON(MODIFIER||||225|Rbp6|protein_coding|CODING|FBtr0310006|1|1);INTRON(MODIFIER||||369|Rbp6|protein_coding|CODING|FBtr0075285|6|1);INTRON(MODI…	The gene RNA-binding protein 6 is referred to in FlyBase by the symbol Dmel\Rbp6 (CG32169, FBgn0260943). It is a protein_coding_gene from Drosophila melanogaster. It has 7 annotated transcripts and 7 polypeptides (all unique). Gene sequence location is 3L:17058774..17238212. It has the cytological map location 73E5-74A1. Protein features are: Nucleotide-binding alpha-beta plait domain; RNA recogn…
FBtr0113428	3L_17132993_SNP	T	G	0.1111	4	32	3.82e-06	0.138284	SiteClass[FBgn0260943|Rbp6|INTRON|0],TranscriptAnnot[INTRON(MODIFIER||||257|Rbp6|protein_coding|CODING|FBtr0113428|1|1);INTRON(MODIFIER||||162|Rbp6|protein_coding|CODING|FBtr0290066|1|1);INTRON(MODIFIER||||259|Rbp6|protein_coding|CODING|FBtr0310005|1|1);INTRON(MODIFIER||||225|Rbp6|protein_coding|CODING|FBtr0310006|1|1);INTRON(MODIFIER||||369|Rbp6|protein_coding|CODING|FBtr0075285|6|1);INTRON(MODI…	-
FBtr0290066	3L_17132993_SNP	T	G	0.1111	4	32	3.82e-06	0.138284	SiteClass[FBgn0260943|Rbp6|INTRON|0],TranscriptAnnot[INTRON(MODIFIER||||257|Rbp6|protein_coding|CODING|FBtr0113428|1|1);INTRON(MODIFIER||||162|Rbp6|protein_coding|CODING|FBtr0290066|1|1);INTRON(MODIFIER||||259|Rbp6|protein_coding|CODING|FBtr0310005|1|1);INTRON(MODIFIER||||225|Rbp6|protein_coding|CODING|FBtr0310006|1|1);INTRON(MODIFIER||||369|Rbp6|protein_coding|CODING|FBtr0075285|6|1);INTRON(MODI…	-
FBtr0310005	3L_17132993_SNP	T	G	0.1111	4	32	3.82e-06	0.138284	SiteClass[FBgn0260943|Rbp6|INTRON|0],TranscriptAnnot[INTRON(MODIFIER||||257|Rbp6|protein_coding|CODING|FBtr0113428|1|1);INTRON(MODIFIER||||162|Rbp6|protein_coding|CODING|FBtr0290066|1|1);INTRON(MODIFIER||||259|Rbp6|protein_coding|CODING|FBtr0310005|1|1);INTRON(MODIFIER||||225|Rbp6|protein_coding|CODING|FBtr0310006|1|1);INTRON(MODIFIER||||369|Rbp6|protein_coding|CODING|FBtr0075285|6|1);INTRON(MODI…	-
FBtr0310006	3L_17132993_SNP	T	G	0.1111	4	32	3.82e-06	0.138284	SiteClass[FBgn0260943|Rbp6|INTRON|0],TranscriptAnnot[INTRON(MODIFIER||||257|Rbp6|protein_coding|CODING|FBtr0113428|1|1);INTRON(MODIFIER||||162|Rbp6|protein_coding|CODING|FBtr0290066|1|1);INTRON(MODIFIER||||259|Rbp6|protein_coding|CODING|FBtr0310005|1|1);INTRON(MODIFIER||||225|Rbp6|protein_coding|CODING|FBtr0310006|1|1);INTRON(MODIFIER||||369|Rbp6|protein_coding|CODING|FBtr0075285|6|1);INTRON(MODI…	-
FBtr0075285	3L_17132993_SNP	T	G	0.1111	4	32	3.82e-06	0.138284	SiteClass[FBgn0260943|Rbp6|INTRON|0],TranscriptAnnot[INTRON(MODIFIER||||257|Rbp6|protein_coding|CODING|FBtr0113428|1|1);INTRON(MODIFIER||||162|Rbp6|protein_coding|CODING|FBtr0290066|1|1);INTRON(MODIFIER||||259|Rbp6|protein_coding|CODING|FBtr0310005|1|1);INTRON(MODIFIER||||225|Rbp6|protein_coding|CODING|FBtr0310006|1|1);INTRON(MODIFIER||||369|Rbp6|protein_coding|CODING|FBtr0075285|6|1);INTRON(MODI…	-
FBtr0113427	3L_17132993_SNP	T	G	0.1111	4	32	3.82e-06	0.138284	SiteClass[FBgn0260943|Rbp6|INTRON|0],TranscriptAnnot[INTRON(MODIFIER||||257|Rbp6|protein_coding|CODING|FBtr0113428|1|1);INTRON(MODIFIER||||162|Rbp6|protein_coding|CODING|FBtr0290066|1|1);INTRON(MODIFIER||||259|Rbp6|protein_coding|CODING|FBtr0310005|1|1);INTRON(MODIFIER||||225|Rbp6|protein_coding|CODING|FBtr0310006|1|1);INTRON(MODIFIER||||369|Rbp6|protein_coding|CODING|FBtr0075285|6|1);INTRON(MODI…	-
FBtr0333861	3L_17132993_SNP	T	G	0.1111	4	32	3.82e-06	0.138284	SiteClass[FBgn0260943|Rbp6|INTRON|0],TranscriptAnnot[INTRON(MODIFIER||||257|Rbp6|protein_coding|CODING|FBtr0113428|1|1);INTRON(MODIFIER||||162|Rbp6|protein_coding|CODING|FBtr0290066|1|1);INTRON(MODIFIER||||259|Rbp6|protein_coding|CODING|FBtr0310005|1|1);INTRON(MODIFIER||||225|Rbp6|protein_coding|CODING|FBtr0310006|1|1);INTRON(MODIFIER||||369|Rbp6|protein_coding|CODING|FBtr0075285|6|1);INTRON(MODI…	-
FBgn0002466	3L_12507092_SNP	T	G	0.1143	4	31	7.27e-06	0.138284	SiteClass[FBgn0002466|sti|SYNONYMOUS_CODING|0;FBgn0266678|CR45168|DOWNSTREAM|613],TranscriptAnnot[SYNONYMOUS_CODING(LOW|SILENT|gcC/gcA|A140|1854|sti|protein_coding|CODING|FBtr0075970|2|1);SYNONYMOUS_CODING(LOW|SILENT|gcC/gcA|A140|1858|sti|protein_coding|CODING|FBtr0332643|2|1);DOWNSTREAM(MODIFIER||613|||CR45168|ncRNA|NON_CODING|FBtr0345043||1)]	The gene sticky is referred to in FlyBase by the symbol Dmel\sti (CG10522, FBgn0002466). It is a protein_coding_gene from Drosophila melanogaster. It has 2 annotated transcripts and 2 polypeptides (all unique). Gene sequence location is 3L:12507998..12514815. It has the cytological map location 69C4. Protein features are: AGC-kinase, C-terminal; Citron homology (CNH) domain; PH domain-like; Prote…
FBgn0266678	3L_12507092_SNP	T	G	0.1143	4	31	7.27e-06	0.138284	SiteClass[FBgn0002466|sti|SYNONYMOUS_CODING|0;FBgn0266678|CR45168|DOWNSTREAM|613],TranscriptAnnot[SYNONYMOUS_CODING(LOW|SILENT|gcC/gcA|A140|1854|sti|protein_coding|CODING|FBtr0075970|2|1);SYNONYMOUS_CODING(LOW|SILENT|gcC/gcA|A140|1858|sti|protein_coding|CODING|FBtr0332643|2|1);DOWNSTREAM(MODIFIER||613|||CR45168|ncRNA|NON_CODING|FBtr0345043||1)]	This gene is referred to in FlyBase by the symbol Dmel\CR45168 (FBgn0266678). It is a non_protein_coding_gene from Drosophila melanogaster. It has one annotated transcript. Gene sequence location is 3L:12514605..12515009. It has the cytological map location 69C4. Its molecular function is unknown. The biological processes in which it is involved are not known. No alleles are reported.
FBtr0075970	3L_12507092_SNP	T	G	0.1143	4	31	7.27e-06	0.138284	SiteClass[FBgn0002466|sti|SYNONYMOUS_CODING|0;FBgn0266678|CR45168|DOWNSTREAM|613],TranscriptAnnot[SYNONYMOUS_CODING(LOW|SILENT|gcC/gcA|A140|1854|sti|protein_coding|CODING|FBtr0075970|2|1);SYNONYMOUS_CODING(LOW|SILENT|gcC/gcA|A140|1858|sti|protein_coding|CODING|FBtr0332643|2|1);DOWNSTREAM(MODIFIER||613|||CR45168|ncRNA|NON_CODING|FBtr0345043||1)]	-
FBtr0332643	3L_12507092_SNP	T	G	0.1143	4	31	7.27e-06	0.138284	SiteClass[FBgn0002466|sti|SYNONYMOUS_CODING|0;FBgn0266678|CR45168|DOWNSTREAM|613],TranscriptAnnot[SYNONYMOUS_CODING(LOW|SILENT|gcC/gcA|A140|1854|sti|protein_coding|CODING|FBtr0075970|2|1);SYNONYMOUS_CODING(LOW|SILENT|gcC/gcA|A140|1858|sti|protein_coding|CODING|FBtr0332643|2|1);DOWNSTREAM(MODIFIER||613|||CR45168|ncRNA|NON_CODING|FBtr0345043||1)]	-
FBtr0345043	3L_12507092_SNP	T	G	0.1143	4	31	7.27e-06	0.138284	SiteClass[FBgn0002466|sti|SYNONYMOUS_CODING|0;FBgn0266678|CR45168|DOWNSTREAM|613],TranscriptAnnot[SYNONYMOUS_CODING(LOW|SILENT|gcC/gcA|A140|1854|sti|protein_coding|CODING|FBtr0075970|2|1);SYNONYMOUS_CODING(LOW|SILENT|gcC/gcA|A140|1858|sti|protein_coding|CODING|FBtr0332643|2|1);DOWNSTREAM(MODIFIER||613|||CR45168|ncRNA|NON_CODING|FBtr0345043||1)]	-
FBgn0010113	3R_26196947_SNP	C	G	0.1081	4	33	8.22e-06	0.138284	SiteClass[FBgn0010113|hdc|UTR_3_PRIME|0],TranscriptAnnot[UTR_3_PRIME(MODIFIER||10685||650|hdc|protein_coding|CODING|FBtr0330311|6|1)]	The gene headcase is referred to in FlyBase by the symbol Dmel\hdc (CG15532, FBgn0010113). It is a protein_coding_gene from Drosophila melanogaster. It has 4 annotated transcripts and 4 polypeptides (3 unique). Gene sequence location is 3R:30277932..30372382. It has the cytological map location 99E4-99F2. Protein features are: Headcase protein; Headcase, middle domain. Its molecular function is d…
FBtr0330311	3R_26196947_SNP	C	G	0.1081	4	33	8.22e-06	0.138284	SiteClass[FBgn0010113|hdc|UTR_3_PRIME|0],TranscriptAnnot[UTR_3_PRIME(MODIFIER||10685||650|hdc|protein_coding|CODING|FBtr0330311|6|1)]	-
FBgn0027589	2R_5660753_SNP	T	A	0.1389	5	31	9.96e-06	0.157989	SiteClass[FBgn0027589|CG1688|INTRON|0],TranscriptAnnot[INTRON(MODIFIER||||918|CG1688|protein_coding|CODING|FBtr0088495|5|1)]	This gene is referred to in FlyBase by the symbol Dmel\CG1688 (FBgn0027589). It is a protein_coding_gene from Drosophila melanogaster. It has one annotated transcript and one polypeptide. Gene sequence location is 2R:9766364..9806875. It has the cytological map location 46B2-46B4. Protein features are: Potassium channel domain; Two pore domain potassium channel. Its molecular function is describe…
FBtr0088495	2R_5660753_SNP	T	A	0.1389	5	31	9.96e-06	0.157989	SiteClass[FBgn0027589|CG1688|INTRON|0],TranscriptAnnot[INTRON(MODIFIER||||918|CG1688|protein_coding|CODING|FBtr0088495|5|1)]	-
FBgn0027589	2R_5660963_SNP	C	G	0.1389	5	31	9.96e-06	0.157989	SiteClass[FBgn0027589|CG1688|INTRON|0],TranscriptAnnot[INTRON(MODIFIER||||918|CG1688|protein_coding|CODING|FBtr0088495|5|1)]	This gene is referred to in FlyBase by the symbol Dmel\CG1688 (FBgn0027589). It is a protein_coding_gene from Drosophila melanogaster. It has one annotated transcript and one polypeptide. Gene sequence location is 2R:9766364..9806875. It has the cytological map location 46B2-46B4. Protein features are: Potassium channel domain; Two pore domain potassium channel. Its molecular function is describe…
FBtr0088495	2R_5660963_SNP	C	G	0.1389	5	31	9.96e-06	0.157989	SiteClass[FBgn0027589|CG1688|INTRON|0],TranscriptAnnot[INTRON(MODIFIER||||918|CG1688|protein_coding|CODING|FBtr0088495|5|1)]	-
FBgn0027589	2R_5660755_SNP	C	T	0.1471	5	29	1.02e-05	0.160319	SiteClass[FBgn0027589|CG1688|INTRON|0],TranscriptAnnot[INTRON(MODIFIER||||918|CG1688|protein_coding|CODING|FBtr0088495|5|1)]	This gene is referred to in FlyBase by the symbol Dmel\CG1688 (FBgn0027589). It is a protein_coding_gene from Drosophila melanogaster. It has one annotated transcript and one polypeptide. Gene sequence location is 2R:9766364..9806875. It has the cytological map location 46B2-46B4. Protein features are: Potassium channel domain; Two pore domain potassium channel. Its molecular function is describe…
FBtr0088495	2R_5660755_SNP	C	T	0.1471	5	29	1.02e-05	0.160319	SiteClass[FBgn0027589|CG1688|INTRON|0],TranscriptAnnot[INTRON(MODIFIER||||918|CG1688|protein_coding|CODING|FBtr0088495|5|1)]	-
FBgn0083978	3L_13028897_DEL	A	ATAAAT	0.1111	4	32	1.07e-05	0.16544	SiteClass[FBgn0083978|CG17672|INTRON|0],TranscriptAnnot[INTRON(MODIFIER||||249|CG17672|protein_coding|CODING|FBtr0110982|4|1)]	This gene is referred to in FlyBase by the symbol Dmel\CG17672 (FBgn0083978). It is a protein_coding_gene from Drosophila melanogaster. It has one annotated transcript and one polypeptide. Gene sequence location is 3L:13028962..13036504. It has the cytological map location 69F6. Protein features are: Cystine-knot cytokine. Its molecular function is described by: . It is involved in the biological…
FBtr0110982	3L_13028897_DEL	A	ATAAAT	0.1111	4	32	1.07e-05	0.16544	SiteClass[FBgn0083978|CG17672|INTRON|0],TranscriptAnnot[INTRON(MODIFIER||||249|CG17672|protein_coding|CODING|FBtr0110982|4|1)]	-
FBgn0023524	X_2151553_SNP	A	G	0.1111	4	32	1.08e-05	0.165528	SiteClass[FBgn0023524|CG3078|INTRON|0],TranscriptAnnot[INTRON(MODIFIER||||743|CG3078|protein_coding|CODING|FBtr0070415|3|1);INTRON(MODIFIER||||744|CG3078|protein_coding|CODING|FBtr0340208|3|1)]	This gene is referred to in FlyBase by the symbol Dmel\CG3078 (FBgn0023524). It is a protein_coding_gene from Drosophila melanogaster. It has 2 annotated transcripts and 2 polypeptides (all unique). Gene sequence location is X:2254403..2259863. It has the cytological map location 2F2. Protein features are: Major facilitator superfamily domain. Its molecular function is described by: . It is invol…
FBtr0070415	X_2151553_SNP	A	G	0.1111	4	32	1.08e-05	0.165528	SiteClass[FBgn0023524|CG3078|INTRON|0],TranscriptAnnot[INTRON(MODIFIER||||743|CG3078|protein_coding|CODING|FBtr0070415|3|1);INTRON(MODIFIER||||744|CG3078|protein_coding|CODING|FBtr0340208|3|1)]	-
FBtr0340208	X_2151553_SNP	A	G	0.1111	4	32	1.08e-05	0.165528	SiteClass[FBgn0023524|CG3078|INTRON|0],TranscriptAnnot[INTRON(MODIFIER||||743|CG3078|protein_coding|CODING|FBtr0070415|3|1);INTRON(MODIFIER||||744|CG3078|protein_coding|CODING|FBtr0340208|3|1)]	-
FBgn0015609	2L_17738613_SNP	C	T	0.1176	4	30	1.14e-05	0.167132	SiteClass[FBgn0015609|CadN|SYNONYMOUS_CODING|0],TranscriptAnnot[SYNONYMOUS_CODING(LOW|SILENT|agA/agG|R302|3096|CadN|protein_coding|CODING|FBtr0081020|2|1);SYNONYMOUS_CODING(LOW|SILENT|agA/agG|R302|3099|CadN|protein_coding|CODING|FBtr0100314|2|1);SYNONYMOUS_CODING(LOW|SILENT|agA/agG|R302|3100|CadN|protein_coding|CODING|FBtr0100313|2|1);SYNONYMOUS_CODING(LOW|SILENT|agA/agG|R302|3096|CadN|protein_co…	The gene Cadherin-N is referred to in FlyBase by the symbol Dmel\CadN (CG7100, FBgn0015609). It is a protein_coding_gene from Drosophila melanogaster. It has 12 annotated transcripts and 12 polypeptides (all unique). Gene sequence location is 2L:17647053..17778340. It has the cytological map location 36D2. Protein features are: Cadherin; Cadherin conserved site; Cadherin, cytoplasmic domain; Cadh…
FBtr0081020	2L_17738613_SNP	C	T	0.1176	4	30	1.14e-05	0.167132	SiteClass[FBgn0015609|CadN|SYNONYMOUS_CODING|0],TranscriptAnnot[SYNONYMOUS_CODING(LOW|SILENT|agA/agG|R302|3096|CadN|protein_coding|CODING|FBtr0081020|2|1);SYNONYMOUS_CODING(LOW|SILENT|agA/agG|R302|3099|CadN|protein_coding|CODING|FBtr0100314|2|1);SYNONYMOUS_CODING(LOW|SILENT|agA/agG|R302|3100|CadN|protein_coding|CODING|FBtr0100313|2|1);SYNONYMOUS_CODING(LOW|SILENT|agA/agG|R302|3096|CadN|protein_co…	-
FBtr0100314	2L_17738613_SNP	C	T	0.1176	4	30	1.14e-05	0.167132	SiteClass[FBgn0015609|CadN|SYNONYMOUS_CODING|0],TranscriptAnnot[SYNONYMOUS_CODING(LOW|SILENT|agA/agG|R302|3096|CadN|protein_coding|CODING|FBtr0081020|2|1);SYNONYMOUS_CODING(LOW|SILENT|agA/agG|R302|3099|CadN|protein_coding|CODING|FBtr0100314|2|1);SYNONYMOUS_CODING(LOW|SILENT|agA/agG|R302|3100|CadN|protein_coding|CODING|FBtr0100313|2|1);SYNONYMOUS_CODING(LOW|SILENT|agA/agG|R302|3096|CadN|protein_co…	-
FBtr0100313	2L_17738613_SNP	C	T	0.1176	4	30	1.14e-05	0.167132	SiteClass[FBgn0015609|CadN|SYNONYMOUS_CODING|0],TranscriptAnnot[SYNONYMOUS_CODING(LOW|SILENT|agA/agG|R302|3096|CadN|protein_coding|CODING|FBtr0081020|2|1);SYNONYMOUS_CODING(LOW|SILENT|agA/agG|R302|3099|CadN|protein_coding|CODING|FBtr0100314|2|1);SYNONYMOUS_CODING(LOW|SILENT|agA/agG|R302|3100|CadN|protein_coding|CODING|FBtr0100313|2|1);SYNONYMOUS_CODING(LOW|SILENT|agA/agG|R302|3096|CadN|protein_co…	-
FBtr0081013	2L_17738613_SNP	C	T	0.1176	4	30	1.14e-05	0.167132	SiteClass[FBgn0015609|CadN|SYNONYMOUS_CODING|0],TranscriptAnnot[SYNONYMOUS_CODING(LOW|SILENT|agA/agG|R302|3096|CadN|protein_coding|CODING|FBtr0081020|2|1);SYNONYMOUS_CODING(LOW|SILENT|agA/agG|R302|3099|CadN|protein_coding|CODING|FBtr0100314|2|1);SYNONYMOUS_CODING(LOW|SILENT|agA/agG|R302|3100|CadN|protein_coding|CODING|FBtr0100313|2|1);SYNONYMOUS_CODING(LOW|SILENT|agA/agG|R302|3096|CadN|protein_co…	-
FBtr0100316	2L_17738613_SNP	C	T	0.1176	4	30	1.14e-05	0.167132	SiteClass[FBgn0015609|CadN|SYNONYMOUS_CODING|0],TranscriptAnnot[SYNONYMOUS_CODING(LOW|SILENT|agA/agG|R302|3096|CadN|protein_coding|CODING|FBtr0081020|2|1);SYNONYMOUS_CODING(LOW|SILENT|agA/agG|R302|3099|CadN|protein_coding|CODING|FBtr0100314|2|1);SYNONYMOUS_CODING(LOW|SILENT|agA/agG|R302|3100|CadN|protein_coding|CODING|FBtr0100313|2|1);SYNONYMOUS_CODING(LOW|SILENT|agA/agG|R302|3096|CadN|protein_co…	-
FBtr0100315	2L_17738613_SNP	C	T	0.1176	4	30	1.14e-05	0.167132	SiteClass[FBgn0015609|CadN|SYNONYMOUS_CODING|0],TranscriptAnnot[SYNONYMOUS_CODING(LOW|SILENT|agA/agG|R302|3096|CadN|protein_coding|CODING|FBtr0081020|2|1);SYNONYMOUS_CODING(LOW|SILENT|agA/agG|R302|3099|CadN|protein_coding|CODING|FBtr0100314|2|1);SYNONYMOUS_CODING(LOW|SILENT|agA/agG|R302|3100|CadN|protein_coding|CODING|FBtr0100313|2|1);SYNONYMOUS_CODING(LOW|SILENT|agA/agG|R302|3096|CadN|protein_co…	-
FBtr0081016	2L_17738613_SNP	C	T	0.1176	4	30	1.14e-05	0.167132	SiteClass[FBgn0015609|CadN|SYNONYMOUS_CODING|0],TranscriptAnnot[SYNONYMOUS_CODING(LOW|SILENT|agA/agG|R302|3096|CadN|protein_coding|CODING|FBtr0081020|2|1);SYNONYMOUS_CODING(LOW|SILENT|agA/agG|R302|3099|CadN|protein_coding|CODING|FBtr0100314|2|1);SYNONYMOUS_CODING(LOW|SILENT|agA/agG|R302|3100|CadN|protein_coding|CODING|FBtr0100313|2|1);SYNONYMOUS_CODING(LOW|SILENT|agA/agG|R302|3096|CadN|protein_co…	-
FBtr0081017	2L_17738613_SNP	C	T	0.1176	4	30	1.14e-05	0.167132	SiteClass[FBgn0015609|CadN|SYNONYMOUS_CODING|0],TranscriptAnnot[SYNONYMOUS_CODING(LOW|SILENT|agA/agG|R302|3096|CadN|protein_coding|CODING|FBtr0081020|2|1);SYNONYMOUS_CODING(LOW|SILENT|agA/agG|R302|3099|CadN|protein_coding|CODING|FBtr0100314|2|1);SYNONYMOUS_CODING(LOW|SILENT|agA/agG|R302|3100|CadN|protein_coding|CODING|FBtr0100313|2|1);SYNONYMOUS_CODING(LOW|SILENT|agA/agG|R302|3096|CadN|protein_co…	-
FBtr0081014	2L_17738613_SNP	C	T	0.1176	4	30	1.14e-05	0.167132	SiteClass[FBgn0015609|CadN|SYNONYMOUS_CODING|0],TranscriptAnnot[SYNONYMOUS_CODING(LOW|SILENT|agA/agG|R302|3096|CadN|protein_coding|CODING|FBtr0081020|2|1);SYNONYMOUS_CODING(LOW|SILENT|agA/agG|R302|3099|CadN|protein_coding|CODING|FBtr0100314|2|1);SYNONYMOUS_CODING(LOW|SILENT|agA/agG|R302|3100|CadN|protein_coding|CODING|FBtr0100313|2|1);SYNONYMOUS_CODING(LOW|SILENT|agA/agG|R302|3096|CadN|protein_co…	-
FBtr0081015	2L_17738613_SNP	C	T	0.1176	4	30	1.14e-05	0.167132	SiteClass[FBgn0015609|CadN|SYNONYMOUS_CODING|0],TranscriptAnnot[SYNONYMOUS_CODING(LOW|SILENT|agA/agG|R302|3096|CadN|protein_coding|CODING|FBtr0081020|2|1);SYNONYMOUS_CODING(LOW|SILENT|agA/agG|R302|3099|CadN|protein_coding|CODING|FBtr0100314|2|1);SYNONYMOUS_CODING(LOW|SILENT|agA/agG|R302|3100|CadN|protein_coding|CODING|FBtr0100313|2|1);SYNONYMOUS_CODING(LOW|SILENT|agA/agG|R302|3096|CadN|protein_co…	-
FBtr0081018	2L_17738613_SNP	C	T	0.1176	4	30	1.14e-05	0.167132	SiteClass[FBgn0015609|CadN|SYNONYMOUS_CODING|0],TranscriptAnnot[SYNONYMOUS_CODING(LOW|SILENT|agA/agG|R302|3096|CadN|protein_coding|CODING|FBtr0081020|2|1);SYNONYMOUS_CODING(LOW|SILENT|agA/agG|R302|3099|CadN|protein_coding|CODING|FBtr0100314|2|1);SYNONYMOUS_CODING(LOW|SILENT|agA/agG|R302|3100|CadN|protein_coding|CODING|FBtr0100313|2|1);SYNONYMOUS_CODING(LOW|SILENT|agA/agG|R302|3096|CadN|protein_co…	-
FBtr0081019	2L_17738613_SNP	C	T	0.1176	4	30	1.14e-05	0.167132	SiteClass[FBgn0015609|CadN|SYNONYMOUS_CODING|0],TranscriptAnnot[SYNONYMOUS_CODING(LOW|SILENT|agA/agG|R302|3096|CadN|protein_coding|CODING|FBtr0081020|2|1);SYNONYMOUS_CODING(LOW|SILENT|agA/agG|R302|3099|CadN|protein_coding|CODING|FBtr0100314|2|1);SYNONYMOUS_CODING(LOW|SILENT|agA/agG|R302|3100|CadN|protein_coding|CODING|FBtr0100313|2|1);SYNONYMOUS_CODING(LOW|SILENT|agA/agG|R302|3096|CadN|protein_co…	-
FBgn0030990	X_19072973_SNP	A	G	0.1351	5	32	1.16e-05	0.167132	SiteClass[FBgn0030990|CG7556|INTRON|0],TranscriptAnnot[INTRON(MODIFIER||||522|CG7556|protein_coding|CODING|FBtr0074697|1|1);INTRON(MODIFIER||||522|CG7556|protein_coding|CODING|FBtr0343313|1|1)]	This gene is referred to in FlyBase by the symbol Dmel\CG7556 (FBgn0030990). It is a protein_coding_gene from Drosophila melanogaster. It has 2 annotated transcripts and 2 polypeptides (1 unique). Gene sequence location is X:19176109..19179830. It has the cytological map location 18A5. Protein features are: DnaJ domain; DnaJ domain, conserved site; Homeodomain-like; Myb-like domain; SANT domain; …
FBtr0074697	X_19072973_SNP	A	G	0.1351	5	32	1.16e-05	0.167132	SiteClass[FBgn0030990|CG7556|INTRON|0],TranscriptAnnot[INTRON(MODIFIER||||522|CG7556|protein_coding|CODING|FBtr0074697|1|1);INTRON(MODIFIER||||522|CG7556|protein_coding|CODING|FBtr0343313|1|1)]	-
FBtr0343313	X_19072973_SNP	A	G	0.1351	5	32	1.16e-05	0.167132	SiteClass[FBgn0030990|CG7556|INTRON|0],TranscriptAnnot[INTRON(MODIFIER||||522|CG7556|protein_coding|CODING|FBtr0074697|1|1);INTRON(MODIFIER||||522|CG7556|protein_coding|CODING|FBtr0343313|1|1)]	-
FBgn0003165	3R_4902426_SNP	C	G	0.129	4	27	1.19e-05	0.167132	SiteClass[FBgn0003165|pum|INTRON|0],TranscriptAnnot[INTRON(MODIFIER||||1533|pum|protein_coding|CODING|FBtr0081990|10|1);INTRON(MODIFIER||||1533|pum|protein_coding|CODING|FBtr0081991|10|1);INTRON(MODIFIER||||1533|pum|protein_coding|CODING|FBtr0081992|10|1);INTRON(MODIFIER||||1185|pum|protein_coding|CODING|FBtr0081993|8|1);INTRON(MODIFIER||||935|pum|protein_coding|CODING|FBtr0081994|4|1);INTRON(MOD…	The gene pumilio is referred to in FlyBase by the symbol Dmel\pum (CG9755, FBgn0003165). It is a protein_coding_gene from Drosophila melanogaster. It has 8 annotated transcripts and 8 polypeptides (5 unique). Gene sequence location is 3R:9066343..9237682. It has the cytological map location 85C4-85D1. Protein features are: Armadillo-like helical; Armadillo-type fold; Pumilio RNA-binding repeat. I…
FBtr0081990	3R_4902426_SNP	C	G	0.129	4	27	1.19e-05	0.167132	SiteClass[FBgn0003165|pum|INTRON|0],TranscriptAnnot[INTRON(MODIFIER||||1533|pum|protein_coding|CODING|FBtr0081990|10|1);INTRON(MODIFIER||||1533|pum|protein_coding|CODING|FBtr0081991|10|1);INTRON(MODIFIER||||1533|pum|protein_coding|CODING|FBtr0081992|10|1);INTRON(MODIFIER||||1185|pum|protein_coding|CODING|FBtr0081993|8|1);INTRON(MODIFIER||||935|pum|protein_coding|CODING|FBtr0081994|4|1);INTRON(MOD…	-
FBtr0081991	3R_4902426_SNP	C	G	0.129	4	27	1.19e-05	0.167132	SiteClass[FBgn0003165|pum|INTRON|0],TranscriptAnnot[INTRON(MODIFIER||||1533|pum|protein_coding|CODING|FBtr0081990|10|1);INTRON(MODIFIER||||1533|pum|protein_coding|CODING|FBtr0081991|10|1);INTRON(MODIFIER||||1533|pum|protein_coding|CODING|FBtr0081992|10|1);INTRON(MODIFIER||||1185|pum|protein_coding|CODING|FBtr0081993|8|1);INTRON(MODIFIER||||935|pum|protein_coding|CODING|FBtr0081994|4|1);INTRON(MOD…	-
FBtr0081992	3R_4902426_SNP	C	G	0.129	4	27	1.19e-05	0.167132	SiteClass[FBgn0003165|pum|INTRON|0],TranscriptAnnot[INTRON(MODIFIER||||1533|pum|protein_coding|CODING|FBtr0081990|10|1);INTRON(MODIFIER||||1533|pum|protein_coding|CODING|FBtr0081991|10|1);INTRON(MODIFIER||||1533|pum|protein_coding|CODING|FBtr0081992|10|1);INTRON(MODIFIER||||1185|pum|protein_coding|CODING|FBtr0081993|8|1);INTRON(MODIFIER||||935|pum|protein_coding|CODING|FBtr0081994|4|1);INTRON(MOD…	-
FBtr0081993	3R_4902426_SNP	C	G	0.129	4	27	1.19e-05	0.167132	SiteClass[FBgn0003165|pum|INTRON|0],TranscriptAnnot[INTRON(MODIFIER||||1533|pum|protein_coding|CODING|FBtr0081990|10|1);INTRON(MODIFIER||||1533|pum|protein_coding|CODING|FBtr0081991|10|1);INTRON(MODIFIER||||1533|pum|protein_coding|CODING|FBtr0081992|10|1);INTRON(MODIFIER||||1185|pum|protein_coding|CODING|FBtr0081993|8|1);INTRON(MODIFIER||||935|pum|protein_coding|CODING|FBtr0081994|4|1);INTRON(MOD…	-
FBtr0081994	3R_4902426_SNP	C	G	0.129	4	27	1.19e-05	0.167132	SiteClass[FBgn0003165|pum|INTRON|0],TranscriptAnnot[INTRON(MODIFIER||||1533|pum|protein_coding|CODING|FBtr0081990|10|1);INTRON(MODIFIER||||1533|pum|protein_coding|CODING|FBtr0081991|10|1);INTRON(MODIFIER||||1533|pum|protein_coding|CODING|FBtr0081992|10|1);INTRON(MODIFIER||||1185|pum|protein_coding|CODING|FBtr0081993|8|1);INTRON(MODIFIER||||935|pum|protein_coding|CODING|FBtr0081994|4|1);INTRON(MOD…	-
FBtr0305197	3R_4902426_SNP	C	G	0.129	4	27	1.19e-05	0.167132	SiteClass[FBgn0003165|pum|INTRON|0],TranscriptAnnot[INTRON(MODIFIER||||1533|pum|protein_coding|CODING|FBtr0081990|10|1);INTRON(MODIFIER||||1533|pum|protein_coding|CODING|FBtr0081991|10|1);INTRON(MODIFIER||||1533|pum|protein_coding|CODING|FBtr0081992|10|1);INTRON(MODIFIER||||1185|pum|protein_coding|CODING|FBtr0081993|8|1);INTRON(MODIFIER||||935|pum|protein_coding|CODING|FBtr0081994|4|1);INTRON(MOD…	-
FBtr0333667	3R_4902426_SNP	C	G	0.129	4	27	1.19e-05	0.167132	SiteClass[FBgn0003165|pum|INTRON|0],TranscriptAnnot[INTRON(MODIFIER||||1533|pum|protein_coding|CODING|FBtr0081990|10|1);INTRON(MODIFIER||||1533|pum|protein_coding|CODING|FBtr0081991|10|1);INTRON(MODIFIER||||1533|pum|protein_coding|CODING|FBtr0081992|10|1);INTRON(MODIFIER||||1185|pum|protein_coding|CODING|FBtr0081993|8|1);INTRON(MODIFIER||||935|pum|protein_coding|CODING|FBtr0081994|4|1);INTRON(MOD…	-
FBtr0333668	3R_4902426_SNP	C	G	0.129	4	27	1.19e-05	0.167132	SiteClass[FBgn0003165|pum|INTRON|0],TranscriptAnnot[INTRON(MODIFIER||||1533|pum|protein_coding|CODING|FBtr0081990|10|1);INTRON(MODIFIER||||1533|pum|protein_coding|CODING|FBtr0081991|10|1);INTRON(MODIFIER||||1533|pum|protein_coding|CODING|FBtr0081992|10|1);INTRON(MODIFIER||||1185|pum|protein_coding|CODING|FBtr0081993|8|1);INTRON(MODIFIER||||935|pum|protein_coding|CODING|FBtr0081994|4|1);INTRON(MOD…	-
FBgn0020018	3R_20486520_SNP	A	G	0.1111	4	32	1.16e-05	0.167132	SiteClass[FBgn0020018|Ppox|SYNONYMOUS_CODING|0;FBgn0051126|CG31126|DOWNSTREAM|533],TranscriptAnnot[SYNONYMOUS_CODING(LOW|SILENT|Ctg/Ttg|L310|475|Ppox|protein_coding|CODING|FBtr0084664|1|1);DOWNSTREAM(MODIFIER||533||150|CG31126|protein_coding|CODING|FBtr0084663||1)]	The gene Protoporphyrinogen oxidase is referred to in FlyBase by the symbol Dmel\Ppox (CG5796, FBgn0020018). It is a protein_coding_gene from Drosophila melanogaster. It has one annotated transcript and one polypeptide. Gene sequence location is 3R:24660197..24661851. It has the cytological map location 96A14. Protein features are: Amine oxidase; FAD/NAD(P)-binding domain; Protoporphyrinogen oxid…
FBgn0051126	3R_20486520_SNP	A	G	0.1111	4	32	1.16e-05	0.167132	SiteClass[FBgn0020018|Ppox|SYNONYMOUS_CODING|0;FBgn0051126|CG31126|DOWNSTREAM|533],TranscriptAnnot[SYNONYMOUS_CODING(LOW|SILENT|Ctg/Ttg|L310|475|Ppox|protein_coding|CODING|FBtr0084664|1|1);DOWNSTREAM(MODIFIER||533||150|CG31126|protein_coding|CODING|FBtr0084663||1)]	This gene is referred to in FlyBase by the symbol Dmel\CG31126 (FBgn0051126). It is a protein_coding_gene from Drosophila melanogaster. It has one annotated transcript and one polypeptide. Gene sequence location is 3R:24659621..24660265. It has the cytological map location 96A14. Protein features are: BolA protein. Its molecular function is described by: . It is involved in the biological process…
FBtr0084664	3R_20486520_SNP	A	G	0.1111	4	32	1.16e-05	0.167132	SiteClass[FBgn0020018|Ppox|SYNONYMOUS_CODING|0;FBgn0051126|CG31126|DOWNSTREAM|533],TranscriptAnnot[SYNONYMOUS_CODING(LOW|SILENT|Ctg/Ttg|L310|475|Ppox|protein_coding|CODING|FBtr0084664|1|1);DOWNSTREAM(MODIFIER||533||150|CG31126|protein_coding|CODING|FBtr0084663||1)]	-
FBtr0084663	3R_20486520_SNP	A	G	0.1111	4	32	1.16e-05	0.167132	SiteClass[FBgn0020018|Ppox|SYNONYMOUS_CODING|0;FBgn0051126|CG31126|DOWNSTREAM|533],TranscriptAnnot[SYNONYMOUS_CODING(LOW|SILENT|Ctg/Ttg|L310|475|Ppox|protein_coding|CODING|FBtr0084664|1|1);DOWNSTREAM(MODIFIER||533||150|CG31126|protein_coding|CODING|FBtr0084663||1)]	-
FBgn0041092	2L_9194106_SNP	G	T	0.1471	5	29	1.14e-05	0.167132	SiteClass[FBgn0041092|tai|INTRON|0],TranscriptAnnot[INTRON(MODIFIER||||2026|tai|protein_coding|CODING|FBtr0303870|3|1);INTRON(MODIFIER||||2026|tai|protein_coding|CODING|FBtr0303871|2|1);INTRON(MODIFIER||||2014|tai|protein_coding|CODING|FBtr0303872|3|1);INTRON(MODIFIER||||1918|tai|protein_coding|CODING|FBtr0303873|3|1);INTRON(MODIFIER||||2047|tai|protein_coding|CODING|FBtr0304974|2|1);INTRON(MODIF…	The gene taiman is referred to in FlyBase by the symbol Dmel\tai (CG13109, FBgn0041092). It is a protein_coding_gene from Drosophila melanogaster. It has 6 annotated transcripts and 6 polypeptides (4 unique). Gene sequence location is 2L:9166778..9250211. It has the cytological map location 30A2-30A6. Protein features are: Myc-type, basic helix-loop-helix (bHLH) domain; Nuclear receptor coactivat…
FBtr0303870	2L_9194106_SNP	G	T	0.1471	5	29	1.14e-05	0.167132	SiteClass[FBgn0041092|tai|INTRON|0],TranscriptAnnot[INTRON(MODIFIER||||2026|tai|protein_coding|CODING|FBtr0303870|3|1);INTRON(MODIFIER||||2026|tai|protein_coding|CODING|FBtr0303871|2|1);INTRON(MODIFIER||||2014|tai|protein_coding|CODING|FBtr0303872|3|1);INTRON(MODIFIER||||1918|tai|protein_coding|CODING|FBtr0303873|3|1);INTRON(MODIFIER||||2047|tai|protein_coding|CODING|FBtr0304974|2|1);INTRON(MODIF…	-
FBtr0303871	2L_9194106_SNP	G	T	0.1471	5	29	1.14e-05	0.167132	SiteClass[FBgn0041092|tai|INTRON|0],TranscriptAnnot[INTRON(MODIFIER||||2026|tai|protein_coding|CODING|FBtr0303870|3|1);INTRON(MODIFIER||||2026|tai|protein_coding|CODING|FBtr0303871|2|1);INTRON(MODIFIER||||2014|tai|protein_coding|CODING|FBtr0303872|3|1);INTRON(MODIFIER||||1918|tai|protein_coding|CODING|FBtr0303873|3|1);INTRON(MODIFIER||||2047|tai|protein_coding|CODING|FBtr0304974|2|1);INTRON(MODIF…	-
FBtr0303872	2L_9194106_SNP	G	T	0.1471	5	29	1.14e-05	0.167132	SiteClass[FBgn0041092|tai|INTRON|0],TranscriptAnnot[INTRON(MODIFIER||||2026|tai|protein_coding|CODING|FBtr0303870|3|1);INTRON(MODIFIER||||2026|tai|protein_coding|CODING|FBtr0303871|2|1);INTRON(MODIFIER||||2014|tai|protein_coding|CODING|FBtr0303872|3|1);INTRON(MODIFIER||||1918|tai|protein_coding|CODING|FBtr0303873|3|1);INTRON(MODIFIER||||2047|tai|protein_coding|CODING|FBtr0304974|2|1);INTRON(MODIF…	-
FBtr0303873	2L_9194106_SNP	G	T	0.1471	5	29	1.14e-05	0.167132	SiteClass[FBgn0041092|tai|INTRON|0],TranscriptAnnot[INTRON(MODIFIER||||2026|tai|protein_coding|CODING|FBtr0303870|3|1);INTRON(MODIFIER||||2026|tai|protein_coding|CODING|FBtr0303871|2|1);INTRON(MODIFIER||||2014|tai|protein_coding|CODING|FBtr0303872|3|1);INTRON(MODIFIER||||1918|tai|protein_coding|CODING|FBtr0303873|3|1);INTRON(MODIFIER||||2047|tai|protein_coding|CODING|FBtr0304974|2|1);INTRON(MODIF…	-
FBtr0304974	2L_9194106_SNP	G	T	0.1471	5	29	1.14e-05	0.167132	SiteClass[FBgn0041092|tai|INTRON|0],TranscriptAnnot[INTRON(MODIFIER||||2026|tai|protein_coding|CODING|FBtr0303870|3|1);INTRON(MODIFIER||||2026|tai|protein_coding|CODING|FBtr0303871|2|1);INTRON(MODIFIER||||2014|tai|protein_coding|CODING|FBtr0303872|3|1);INTRON(MODIFIER||||1918|tai|protein_coding|CODING|FBtr0303873|3|1);INTRON(MODIFIER||||2047|tai|protein_coding|CODING|FBtr0304974|2|1);INTRON(MODIF…	-
FBtr0333405	2L_9194106_SNP	G	T	0.1471	5	29	1.14e-05	0.167132	SiteClass[FBgn0041092|tai|INTRON|0],TranscriptAnnot[INTRON(MODIFIER||||2026|tai|protein_coding|CODING|FBtr0303870|3|1);INTRON(MODIFIER||||2026|tai|protein_coding|CODING|FBtr0303871|2|1);INTRON(MODIFIER||||2014|tai|protein_coding|CODING|FBtr0303872|3|1);INTRON(MODIFIER||||1918|tai|protein_coding|CODING|FBtr0303873|3|1);INTRON(MODIFIER||||2047|tai|protein_coding|CODING|FBtr0304974|2|1);INTRON(MODIF…	-
FBgn0031568	2L_3730313_INS	TT	T	0.1212	4	29	1.19e-05	0.167132	SiteClass[FBgn0031568|CG10019|UPSTREAM|152],TranscriptAnnot[UPSTREAM(MODIFIER||152||1104|CG10019|protein_coding|CODING|FBtr0321291||1);INTERGENIC(MODIFIER||||||||||1)]	This gene is referred to in FlyBase by the symbol Dmel\CG10019 (FBgn0031568). It is a protein_coding_gene from Drosophila melanogaster. It has 2 annotated transcripts and 2 polypeptides (1 unique). Gene sequence location is 2L:3730466..3754617. It has the cytological map location 24C2-24C3. Protein features are: Major facilitator superfamily; Major facilitator superfamily domain. Its molecular fu…
FBtr0321291	2L_3730313_INS	TT	T	0.1212	4	29	1.19e-05	0.167132	SiteClass[FBgn0031568|CG10019|UPSTREAM|152],TranscriptAnnot[UPSTREAM(MODIFIER||152||1104|CG10019|protein_coding|CODING|FBtr0321291||1);INTERGENIC(MODIFIER||||||||||1)]	-
FBgn0015589	3R_24658939_SNP	T	C	0.1622	6	31	1.17e-05	0.167132	SiteClass[FBgn0015589|Apc|UTR_3_PRIME|0],TranscriptAnnot[UTR_3_PRIME(MODIFIER||18||2417|Apc|protein_coding|CODING|FBtr0336767|4|1);UTR_3_PRIME(MODIFIER||18||2417|Apc|protein_coding|CODING|FBtr0085351|4|1)]	The gene APC-like is referred to in FlyBase by the symbol Dmel\Apc (CG1451, FBgn0015589). It is a protein_coding_gene from Drosophila melanogaster. It has 3 annotated transcripts and 3 polypeptides (2 unique). Gene sequence location is 3R:28832301..28844748. It has the cytological map location 98E5-98E6. Protein features are: Adenomatous polyposis coli (APC) family; Adenomatous polyposis coli pro…
FBtr0336767	3R_24658939_SNP	T	C	0.1622	6	31	1.17e-05	0.167132	SiteClass[FBgn0015589|Apc|UTR_3_PRIME|0],TranscriptAnnot[UTR_3_PRIME(MODIFIER||18||2417|Apc|protein_coding|CODING|FBtr0336767|4|1);UTR_3_PRIME(MODIFIER||18||2417|Apc|protein_coding|CODING|FBtr0085351|4|1)]	-
FBtr0085351	3R_24658939_SNP	T	C	0.1622	6	31	1.17e-05	0.167132	SiteClass[FBgn0015589|Apc|UTR_3_PRIME|0],TranscriptAnnot[UTR_3_PRIME(MODIFIER||18||2417|Apc|protein_coding|CODING|FBtr0336767|4|1);UTR_3_PRIME(MODIFIER||18||2417|Apc|protein_coding|CODING|FBtr0085351|4|1)]	-
FBgn0004870	3L_1085932_SNP	C	G	0.1212	4	29	1.24e-05	0.172015	SiteClass[FBgn0004870|bab1|INTRON|0],TranscriptAnnot[INTRON(MODIFIER||||977|bab1|protein_coding|CODING|FBtr0072642|1|1);INTRON(MODIFIER||||970|bab1|protein_coding|CODING|FBtr0333268|1|1);INTRON(MODIFIER||||971|bab1|protein_coding|CODING|FBtr0333269|1|1);INTRON(MODIFIER||||976|bab1|protein_coding|CODING|FBtr0333270|1|1)]	The gene bric a brac 1 is referred to in FlyBase by the symbol Dmel\bab1 (CG9097, FBgn0004870). It is a protein_coding_gene from Drosophila melanogaster. It has 4 annotated transcripts and 4 polypeptides (all unique). Gene sequence location is 3L:1036369..1101089. It has the cytological map location 61E2-61F1. Protein features are: BTB/POZ domain; DNA binding HTH domain, Psq-type; Homeodomain-lik…
FBtr0072642	3L_1085932_SNP	C	G	0.1212	4	29	1.24e-05	0.172015	SiteClass[FBgn0004870|bab1|INTRON|0],TranscriptAnnot[INTRON(MODIFIER||||977|bab1|protein_coding|CODING|FBtr0072642|1|1);INTRON(MODIFIER||||970|bab1|protein_coding|CODING|FBtr0333268|1|1);INTRON(MODIFIER||||971|bab1|protein_coding|CODING|FBtr0333269|1|1);INTRON(MODIFIER||||976|bab1|protein_coding|CODING|FBtr0333270|1|1)]	-
FBtr0333268	3L_1085932_SNP	C	G	0.1212	4	29	1.24e-05	0.172015	SiteClass[FBgn0004870|bab1|INTRON|0],TranscriptAnnot[INTRON(MODIFIER||||977|bab1|protein_coding|CODING|FBtr0072642|1|1);INTRON(MODIFIER||||970|bab1|protein_coding|CODING|FBtr0333268|1|1);INTRON(MODIFIER||||971|bab1|protein_coding|CODING|FBtr0333269|1|1);INTRON(MODIFIER||||976|bab1|protein_coding|CODING|FBtr0333270|1|1)]	-
FBtr0333269	3L_1085932_SNP	C	G	0.1212	4	29	1.24e-05	0.172015	SiteClass[FBgn0004870|bab1|INTRON|0],TranscriptAnnot[INTRON(MODIFIER||||977|bab1|protein_coding|CODING|FBtr0072642|1|1);INTRON(MODIFIER||||970|bab1|protein_coding|CODING|FBtr0333268|1|1);INTRON(MODIFIER||||971|bab1|protein_coding|CODING|FBtr0333269|1|1);INTRON(MODIFIER||||976|bab1|protein_coding|CODING|FBtr0333270|1|1)]	-
FBtr0333270	3L_1085932_SNP	C	G	0.1212	4	29	1.24e-05	0.172015	SiteClass[FBgn0004870|bab1|INTRON|0],TranscriptAnnot[INTRON(MODIFIER||||977|bab1|protein_coding|CODING|FBtr0072642|1|1);INTRON(MODIFIER||||970|bab1|protein_coding|CODING|FBtr0333268|1|1);INTRON(MODIFIER||||971|bab1|protein_coding|CODING|FBtr0333269|1|1);INTRON(MODIFIER||||976|bab1|protein_coding|CODING|FBtr0333270|1|1)]	-
FBgn0052423	3L_5268004_SNP	G	A	0.1351	5	32	1.26e-05	0.172015	SiteClass[FBgn0052423|shep|INTRON|0],TranscriptAnnot[INTRON(MODIFIER||||578|shep|protein_coding|CODING|FBtr0077172|2|1);INTRON(MODIFIER||||590|shep|protein_coding|CODING|FBtr0308859|2|1)]	The gene alan shepard is referred to in FlyBase by the symbol Dmel\shep (CG32423, FBgn0052423). It is a protein_coding_gene from Drosophila melanogaster. It has 8 annotated transcripts and 8 polypeptides (6 unique). Gene sequence location is 3L:5155821..5277944. It has the cytological map location 64C7-64C11. Protein features are: Nucleotide-binding alpha-beta plait domain; Paraneoplastic encepha…
FBtr0077172	3L_5268004_SNP	G	A	0.1351	5	32	1.26e-05	0.172015	SiteClass[FBgn0052423|shep|INTRON|0],TranscriptAnnot[INTRON(MODIFIER||||578|shep|protein_coding|CODING|FBtr0077172|2|1);INTRON(MODIFIER||||590|shep|protein_coding|CODING|FBtr0308859|2|1)]	-
FBtr0308859	3L_5268004_SNP	G	A	0.1351	5	32	1.26e-05	0.172015	SiteClass[FBgn0052423|shep|INTRON|0],TranscriptAnnot[INTRON(MODIFIER||||578|shep|protein_coding|CODING|FBtr0077172|2|1);INTRON(MODIFIER||||590|shep|protein_coding|CODING|FBtr0308859|2|1)]	-
FBgn0050046	2R_8203366_SNP	A	G	0.1111	4	32	1.35e-05	0.175919	SiteClass[FBgn0050046|CG30046|INTRON|0],TranscriptAnnot[INTRON(MODIFIER||||839|CG30046|protein_coding|CODING|FBtr0087895|5|1);INTRON(MODIFIER||||839|CG30046|protein_coding|CODING|FBtr0339627|5|1)]	This gene is referred to in FlyBase by the symbol Dmel\CG30046 (FBgn0050046). It is a protein_coding_gene from Drosophila melanogaster. It has 2 annotated transcripts and 2 polypeptides (1 unique). Gene sequence location is 2R:12314117..12317573. It has the cytological map location 48F7. Protein features are: Pancreatic trypsin inhibitor Kunitz domain; Reeler domain; Spondin, N-terminal; Thrombos…
FBtr0087895	2R_8203366_SNP	A	G	0.1111	4	32	1.35e-05	0.175919	SiteClass[FBgn0050046|CG30046|INTRON|0],TranscriptAnnot[INTRON(MODIFIER||||839|CG30046|protein_coding|CODING|FBtr0087895|5|1);INTRON(MODIFIER||||839|CG30046|protein_coding|CODING|FBtr0339627|5|1)]	-
FBtr0339627	2R_8203366_SNP	A	G	0.1111	4	32	1.35e-05	0.175919	SiteClass[FBgn0050046|CG30046|INTRON|0],TranscriptAnnot[INTRON(MODIFIER||||839|CG30046|protein_coding|CODING|FBtr0087895|5|1);INTRON(MODIFIER||||839|CG30046|protein_coding|CODING|FBtr0339627|5|1)]	-
FBgn0030990	X_19072995_SNP	C	T	0.1515	5	28	1.35e-05	0.175919	SiteClass[FBgn0030990|CG7556|INTRON|0],TranscriptAnnot[INTRON(MODIFIER||||522|CG7556|protein_coding|CODING|FBtr0074697|1|1);INTRON(MODIFIER||||522|CG7556|protein_coding|CODING|FBtr0343313|1|1)]	This gene is referred to in FlyBase by the symbol Dmel\CG7556 (FBgn0030990). It is a protein_coding_gene from Drosophila melanogaster. It has 2 annotated transcripts and 2 polypeptides (1 unique). Gene sequence location is X:19176109..19179830. It has the cytological map location 18A5. Protein features are: DnaJ domain; DnaJ domain, conserved site; Homeodomain-like; Myb-like domain; SANT domain; …
FBtr0074697	X_19072995_SNP	C	T	0.1515	5	28	1.35e-05	0.175919	SiteClass[FBgn0030990|CG7556|INTRON|0],TranscriptAnnot[INTRON(MODIFIER||||522|CG7556|protein_coding|CODING|FBtr0074697|1|1);INTRON(MODIFIER||||522|CG7556|protein_coding|CODING|FBtr0343313|1|1)]	-
FBtr0343313	X_19072995_SNP	C	T	0.1515	5	28	1.35e-05	0.175919	SiteClass[FBgn0030990|CG7556|INTRON|0],TranscriptAnnot[INTRON(MODIFIER||||522|CG7556|protein_coding|CODING|FBtr0074697|1|1);INTRON(MODIFIER||||522|CG7556|protein_coding|CODING|FBtr0343313|1|1)]	-
FBgn0038676	3R_14870349_SNP	T	C	0.1176	4	30	1.36e-05	0.175919	SiteClass[FBgn0038676|CG6026|UTR_3_PRIME|0;FBgn0004876|cdi|DOWNSTREAM|255],TranscriptAnnot[UTR_3_PRIME(MODIFIER||384||1555|CG6026|protein_coding|CODING|FBtr0273301|3|1);DOWNSTREAM(MODIFIER||255||942|cdi|protein_coding|CODING|FBtr0305321||1)]	This gene is referred to in FlyBase by the symbol Dmel\CG6026 (FBgn0038676). It is a protein_coding_gene from Drosophila melanogaster. It has one annotated transcript and one polypeptide. Gene sequence location is 3R:19033538..19044693. It has the cytological map location 91E4. Its molecular function is unknown. The biological processes in which it is involved are not known. 4 alleles are reporte…
FBgn0004876	3R_14870349_SNP	T	C	0.1176	4	30	1.36e-05	0.175919	SiteClass[FBgn0038676|CG6026|UTR_3_PRIME|0;FBgn0004876|cdi|DOWNSTREAM|255],TranscriptAnnot[UTR_3_PRIME(MODIFIER||384||1555|CG6026|protein_coding|CODING|FBtr0273301|3|1);DOWNSTREAM(MODIFIER||255||942|cdi|protein_coding|CODING|FBtr0305321||1)]	The gene center divider is referred to in FlyBase by the symbol Dmel\cdi (CG6027, FBgn0004876). It is a protein_coding_gene from Drosophila melanogaster. It has 2 annotated transcripts and 2 polypeptides (all unique). Gene sequence location is 3R:19044882..19094270. It has the cytological map location 91E4-91F1. Protein features are: Protein kinase domain; Protein kinase, ATP binding site; Protei…
FBtr0273301	3R_14870349_SNP	T	C	0.1176	4	30	1.36e-05	0.175919	SiteClass[FBgn0038676|CG6026|UTR_3_PRIME|0;FBgn0004876|cdi|DOWNSTREAM|255],TranscriptAnnot[UTR_3_PRIME(MODIFIER||384||1555|CG6026|protein_coding|CODING|FBtr0273301|3|1);DOWNSTREAM(MODIFIER||255||942|cdi|protein_coding|CODING|FBtr0305321||1)]	-
FBtr0305321	3R_14870349_SNP	T	C	0.1176	4	30	1.36e-05	0.175919	SiteClass[FBgn0038676|CG6026|UTR_3_PRIME|0;FBgn0004876|cdi|DOWNSTREAM|255],TranscriptAnnot[UTR_3_PRIME(MODIFIER||384||1555|CG6026|protein_coding|CODING|FBtr0273301|3|1);DOWNSTREAM(MODIFIER||255||942|cdi|protein_coding|CODING|FBtr0305321||1)]	-
FBgn0260487	3R_23196805_SNP	T	C	0.1111	4	32	1.35e-05	0.175919	SiteClass[FBgn0260487|CG42534|UTR_3_PRIME|0],TranscriptAnnot[UTR_3_PRIME(MODIFIER||103||1555|CG42534|protein_coding|CODING|FBtr0300898|7|1);UTR_3_PRIME(MODIFIER||103||1430|CG42534|protein_coding|CODING|FBtr0309307|7|1)]	This gene is referred to in FlyBase by the symbol Dmel\CG42534 (FBgn0260487). It is a protein_coding_gene from Drosophila melanogaster. It has 2 annotated transcripts and 2 polypeptides (all unique). Gene sequence location is 3R:27340622..27372574. It has the cytological map location 97F4. Protein features are: Ankyrin repeat; Ankyrin repeat-containing domain. Its molecular function is unknown. T…
FBtr0300898	3R_23196805_SNP	T	C	0.1111	4	32	1.35e-05	0.175919	SiteClass[FBgn0260487|CG42534|UTR_3_PRIME|0],TranscriptAnnot[UTR_3_PRIME(MODIFIER||103||1555|CG42534|protein_coding|CODING|FBtr0300898|7|1);UTR_3_PRIME(MODIFIER||103||1430|CG42534|protein_coding|CODING|FBtr0309307|7|1)]	-
FBtr0309307	3R_23196805_SNP	T	C	0.1111	4	32	1.35e-05	0.175919	SiteClass[FBgn0260487|CG42534|UTR_3_PRIME|0],TranscriptAnnot[UTR_3_PRIME(MODIFIER||103||1555|CG42534|protein_coding|CODING|FBtr0300898|7|1);UTR_3_PRIME(MODIFIER||103||1430|CG42534|protein_coding|CODING|FBtr0309307|7|1)]	-
FBgn0036287	3L_12473308_SNP	T	C	0.125	4	28	1.32e-05	0.175919	SiteClass[FBgn0036287|CG10663|INTRON|0],TranscriptAnnot[INTRON(MODIFIER||||748|CG10663|protein_coding|CODING|FBtr0113167|1|1);INTRON(MODIFIER||||748|CG10663|protein_coding|CODING|FBtr0346570|1|1)]	This gene is referred to in FlyBase by the symbol Dmel\CG10663 (FBgn0036287). It is a protein_coding_gene from Drosophila melanogaster. It has 2 annotated transcripts and 2 polypeptides (1 unique). Gene sequence location is 3L:12474418..12485035. It has the cytological map location 69C2. Protein features are: Peptidase S1, PA clan; Peptidase S1, trypsin family, active site; Peptidase S1A, chymotr…
FBtr0113167	3L_12473308_SNP	T	C	0.125	4	28	1.32e-05	0.175919	SiteClass[FBgn0036287|CG10663|INTRON|0],TranscriptAnnot[INTRON(MODIFIER||||748|CG10663|protein_coding|CODING|FBtr0113167|1|1);INTRON(MODIFIER||||748|CG10663|protein_coding|CODING|FBtr0346570|1|1)]	-
FBtr0346570	3L_12473308_SNP	T	C	0.125	4	28	1.32e-05	0.175919	SiteClass[FBgn0036287|CG10663|INTRON|0],TranscriptAnnot[INTRON(MODIFIER||||748|CG10663|protein_coding|CODING|FBtr0113167|1|1);INTRON(MODIFIER||||748|CG10663|protein_coding|CODING|FBtr0346570|1|1)]	-
FBgn0260943	3L_17091907_DEL	A	AA	0.1143	4	31	1.41e-05	0.17651	SiteClass[FBgn0260943|Rbp6|INTRON|0],TranscriptAnnot[INTRON(MODIFIER||||369|Rbp6|protein_coding|CODING|FBtr0075285|7|1);INTRON(MODIFIER||||499|Rbp6|protein_coding|CODING|FBtr0113427|7|1);INTRON(MODIFIER||||257|Rbp6|protein_coding|CODING|FBtr0113428|2|1);INTRON(MODIFIER||||162|Rbp6|protein_coding|CODING|FBtr0290066|2|1);INTRON(MODIFIER||||259|Rbp6|protein_coding|CODING|FBtr0310005|2|1);INTRON(MODI…	The gene RNA-binding protein 6 is referred to in FlyBase by the symbol Dmel\Rbp6 (CG32169, FBgn0260943). It is a protein_coding_gene from Drosophila melanogaster. It has 7 annotated transcripts and 7 polypeptides (all unique). Gene sequence location is 3L:17058774..17238212. It has the cytological map location 73E5-74A1. Protein features are: Nucleotide-binding alpha-beta plait domain; RNA recogn…
FBtr0075285	3L_17091907_DEL	A	AA	0.1143	4	31	1.41e-05	0.17651	SiteClass[FBgn0260943|Rbp6|INTRON|0],TranscriptAnnot[INTRON(MODIFIER||||369|Rbp6|protein_coding|CODING|FBtr0075285|7|1);INTRON(MODIFIER||||499|Rbp6|protein_coding|CODING|FBtr0113427|7|1);INTRON(MODIFIER||||257|Rbp6|protein_coding|CODING|FBtr0113428|2|1);INTRON(MODIFIER||||162|Rbp6|protein_coding|CODING|FBtr0290066|2|1);INTRON(MODIFIER||||259|Rbp6|protein_coding|CODING|FBtr0310005|2|1);INTRON(MODI…	-
FBtr0113427	3L_17091907_DEL	A	AA	0.1143	4	31	1.41e-05	0.17651	SiteClass[FBgn0260943|Rbp6|INTRON|0],TranscriptAnnot[INTRON(MODIFIER||||369|Rbp6|protein_coding|CODING|FBtr0075285|7|1);INTRON(MODIFIER||||499|Rbp6|protein_coding|CODING|FBtr0113427|7|1);INTRON(MODIFIER||||257|Rbp6|protein_coding|CODING|FBtr0113428|2|1);INTRON(MODIFIER||||162|Rbp6|protein_coding|CODING|FBtr0290066|2|1);INTRON(MODIFIER||||259|Rbp6|protein_coding|CODING|FBtr0310005|2|1);INTRON(MODI…	-
FBtr0113428	3L_17091907_DEL	A	AA	0.1143	4	31	1.41e-05	0.17651	SiteClass[FBgn0260943|Rbp6|INTRON|0],TranscriptAnnot[INTRON(MODIFIER||||369|Rbp6|protein_coding|CODING|FBtr0075285|7|1);INTRON(MODIFIER||||499|Rbp6|protein_coding|CODING|FBtr0113427|7|1);INTRON(MODIFIER||||257|Rbp6|protein_coding|CODING|FBtr0113428|2|1);INTRON(MODIFIER||||162|Rbp6|protein_coding|CODING|FBtr0290066|2|1);INTRON(MODIFIER||||259|Rbp6|protein_coding|CODING|FBtr0310005|2|1);INTRON(MODI…	-
FBtr0290066	3L_17091907_DEL	A	AA	0.1143	4	31	1.41e-05	0.17651	SiteClass[FBgn0260943|Rbp6|INTRON|0],TranscriptAnnot[INTRON(MODIFIER||||369|Rbp6|protein_coding|CODING|FBtr0075285|7|1);INTRON(MODIFIER||||499|Rbp6|protein_coding|CODING|FBtr0113427|7|1);INTRON(MODIFIER||||257|Rbp6|protein_coding|CODING|FBtr0113428|2|1);INTRON(MODIFIER||||162|Rbp6|protein_coding|CODING|FBtr0290066|2|1);INTRON(MODIFIER||||259|Rbp6|protein_coding|CODING|FBtr0310005|2|1);INTRON(MODI…	-
FBtr0310005	3L_17091907_DEL	A	AA	0.1143	4	31	1.41e-05	0.17651	SiteClass[FBgn0260943|Rbp6|INTRON|0],TranscriptAnnot[INTRON(MODIFIER||||369|Rbp6|protein_coding|CODING|FBtr0075285|7|1);INTRON(MODIFIER||||499|Rbp6|protein_coding|CODING|FBtr0113427|7|1);INTRON(MODIFIER||||257|Rbp6|protein_coding|CODING|FBtr0113428|2|1);INTRON(MODIFIER||||162|Rbp6|protein_coding|CODING|FBtr0290066|2|1);INTRON(MODIFIER||||259|Rbp6|protein_coding|CODING|FBtr0310005|2|1);INTRON(MODI…	-
FBtr0310006	3L_17091907_DEL	A	AA	0.1143	4	31	1.41e-05	0.17651	SiteClass[FBgn0260943|Rbp6|INTRON|0],TranscriptAnnot[INTRON(MODIFIER||||369|Rbp6|protein_coding|CODING|FBtr0075285|7|1);INTRON(MODIFIER||||499|Rbp6|protein_coding|CODING|FBtr0113427|7|1);INTRON(MODIFIER||||257|Rbp6|protein_coding|CODING|FBtr0113428|2|1);INTRON(MODIFIER||||162|Rbp6|protein_coding|CODING|FBtr0290066|2|1);INTRON(MODIFIER||||259|Rbp6|protein_coding|CODING|FBtr0310005|2|1);INTRON(MODI…	-
FBtr0333861	3L_17091907_DEL	A	AA	0.1143	4	31	1.41e-05	0.17651	SiteClass[FBgn0260943|Rbp6|INTRON|0],TranscriptAnnot[INTRON(MODIFIER||||369|Rbp6|protein_coding|CODING|FBtr0075285|7|1);INTRON(MODIFIER||||499|Rbp6|protein_coding|CODING|FBtr0113427|7|1);INTRON(MODIFIER||||257|Rbp6|protein_coding|CODING|FBtr0113428|2|1);INTRON(MODIFIER||||162|Rbp6|protein_coding|CODING|FBtr0290066|2|1);INTRON(MODIFIER||||259|Rbp6|protein_coding|CODING|FBtr0310005|2|1);INTRON(MODI…	-
FBgn0038676	3R_14870501_SNP	G	T	0.1081	4	33	1.44e-05	0.17651	SiteClass[FBgn0038676|CG6026|DOWNSTREAM|86;FBgn0004876|cdi|DOWNSTREAM|103],TranscriptAnnot[DOWNSTREAM(MODIFIER||103||942|cdi|protein_coding|CODING|FBtr0305321||1);DOWNSTREAM(MODIFIER||915||1213|cdi|protein_coding|CODING|FBtr0083716||1);DOWNSTREAM(MODIFIER||86||1555|CG6026|protein_coding|CODING|FBtr0273301||1);INTERGENIC(MODIFIER||||||||||1)]	This gene is referred to in FlyBase by the symbol Dmel\CG6026 (FBgn0038676). It is a protein_coding_gene from Drosophila melanogaster. It has one annotated transcript and one polypeptide. Gene sequence location is 3R:19033538..19044693. It has the cytological map location 91E4. Its molecular function is unknown. The biological processes in which it is involved are not known. 4 alleles are reporte…
FBgn0004876	3R_14870501_SNP	G	T	0.1081	4	33	1.44e-05	0.17651	SiteClass[FBgn0038676|CG6026|DOWNSTREAM|86;FBgn0004876|cdi|DOWNSTREAM|103],TranscriptAnnot[DOWNSTREAM(MODIFIER||103||942|cdi|protein_coding|CODING|FBtr0305321||1);DOWNSTREAM(MODIFIER||915||1213|cdi|protein_coding|CODING|FBtr0083716||1);DOWNSTREAM(MODIFIER||86||1555|CG6026|protein_coding|CODING|FBtr0273301||1);INTERGENIC(MODIFIER||||||||||1)]	The gene center divider is referred to in FlyBase by the symbol Dmel\cdi (CG6027, FBgn0004876). It is a protein_coding_gene from Drosophila melanogaster. It has 2 annotated transcripts and 2 polypeptides (all unique). Gene sequence location is 3R:19044882..19094270. It has the cytological map location 91E4-91F1. Protein features are: Protein kinase domain; Protein kinase, ATP binding site; Protei…
FBtr0305321	3R_14870501_SNP	G	T	0.1081	4	33	1.44e-05	0.17651	SiteClass[FBgn0038676|CG6026|DOWNSTREAM|86;FBgn0004876|cdi|DOWNSTREAM|103],TranscriptAnnot[DOWNSTREAM(MODIFIER||103||942|cdi|protein_coding|CODING|FBtr0305321||1);DOWNSTREAM(MODIFIER||915||1213|cdi|protein_coding|CODING|FBtr0083716||1);DOWNSTREAM(MODIFIER||86||1555|CG6026|protein_coding|CODING|FBtr0273301||1);INTERGENIC(MODIFIER||||||||||1)]	-
FBtr0083716	3R_14870501_SNP	G	T	0.1081	4	33	1.44e-05	0.17651	SiteClass[FBgn0038676|CG6026|DOWNSTREAM|86;FBgn0004876|cdi|DOWNSTREAM|103],TranscriptAnnot[DOWNSTREAM(MODIFIER||103||942|cdi|protein_coding|CODING|FBtr0305321||1);DOWNSTREAM(MODIFIER||915||1213|cdi|protein_coding|CODING|FBtr0083716||1);DOWNSTREAM(MODIFIER||86||1555|CG6026|protein_coding|CODING|FBtr0273301||1);INTERGENIC(MODIFIER||||||||||1)]	-
FBtr0273301	3R_14870501_SNP	G	T	0.1081	4	33	1.44e-05	0.17651	SiteClass[FBgn0038676|CG6026|DOWNSTREAM|86;FBgn0004876|cdi|DOWNSTREAM|103],TranscriptAnnot[DOWNSTREAM(MODIFIER||103||942|cdi|protein_coding|CODING|FBtr0305321||1);DOWNSTREAM(MODIFIER||915||1213|cdi|protein_coding|CODING|FBtr0083716||1);DOWNSTREAM(MODIFIER||86||1555|CG6026|protein_coding|CODING|FBtr0273301||1);INTERGENIC(MODIFIER||||||||||1)]	-
FBgn0263132	X_9919468_SNP	G	C	0.1081	4	33	1.44e-05	0.17651	SiteClass[FBgn0263132|Cht6|INTRON|0],TranscriptAnnot[INTRON(MODIFIER||||4611|Cht6|protein_coding|CODING|FBtr0307369|2|1);INTRON(MODIFIER||||1367|Cht6|protein_coding|CODING|FBtr0307370|1|1);INTRON(MODIFIER||||1580|Cht6|protein_coding|CODING|FBtr0307371|1|1);INTRON(MODIFIER||||2225|Cht6|protein_coding|CODING|FBtr0307372|1|1);INTRON(MODIFIER||||2574|Cht6|protein_coding|CODING|FBtr0307373|1|1);INTRON…	The gene Cht6 is referred to in FlyBase by the symbol Dmel\Cht6 (CG43374, FBgn0263132). It is a protein_coding_gene from Drosophila melanogaster. It has 7 annotated transcripts and 7 polypeptides (all unique). Gene sequence location is X:10016845..10050803. It has the cytological map location 9A5. Protein features are: Chitin binding domain; Chitinase II; Chitinase insertion domain; Glycoside hyd…
FBtr0307369	X_9919468_SNP	G	C	0.1081	4	33	1.44e-05	0.17651	SiteClass[FBgn0263132|Cht6|INTRON|0],TranscriptAnnot[INTRON(MODIFIER||||4611|Cht6|protein_coding|CODING|FBtr0307369|2|1);INTRON(MODIFIER||||1367|Cht6|protein_coding|CODING|FBtr0307370|1|1);INTRON(MODIFIER||||1580|Cht6|protein_coding|CODING|FBtr0307371|1|1);INTRON(MODIFIER||||2225|Cht6|protein_coding|CODING|FBtr0307372|1|1);INTRON(MODIFIER||||2574|Cht6|protein_coding|CODING|FBtr0307373|1|1);INTRON…	-
FBtr0307370	X_9919468_SNP	G	C	0.1081	4	33	1.44e-05	0.17651	SiteClass[FBgn0263132|Cht6|INTRON|0],TranscriptAnnot[INTRON(MODIFIER||||4611|Cht6|protein_coding|CODING|FBtr0307369|2|1);INTRON(MODIFIER||||1367|Cht6|protein_coding|CODING|FBtr0307370|1|1);INTRON(MODIFIER||||1580|Cht6|protein_coding|CODING|FBtr0307371|1|1);INTRON(MODIFIER||||2225|Cht6|protein_coding|CODING|FBtr0307372|1|1);INTRON(MODIFIER||||2574|Cht6|protein_coding|CODING|FBtr0307373|1|1);INTRON…	-
FBtr0307371	X_9919468_SNP	G	C	0.1081	4	33	1.44e-05	0.17651	SiteClass[FBgn0263132|Cht6|INTRON|0],TranscriptAnnot[INTRON(MODIFIER||||4611|Cht6|protein_coding|CODING|FBtr0307369|2|1);INTRON(MODIFIER||||1367|Cht6|protein_coding|CODING|FBtr0307370|1|1);INTRON(MODIFIER||||1580|Cht6|protein_coding|CODING|FBtr0307371|1|1);INTRON(MODIFIER||||2225|Cht6|protein_coding|CODING|FBtr0307372|1|1);INTRON(MODIFIER||||2574|Cht6|protein_coding|CODING|FBtr0307373|1|1);INTRON…	-
FBtr0307372	X_9919468_SNP	G	C	0.1081	4	33	1.44e-05	0.17651	SiteClass[FBgn0263132|Cht6|INTRON|0],TranscriptAnnot[INTRON(MODIFIER||||4611|Cht6|protein_coding|CODING|FBtr0307369|2|1);INTRON(MODIFIER||||1367|Cht6|protein_coding|CODING|FBtr0307370|1|1);INTRON(MODIFIER||||1580|Cht6|protein_coding|CODING|FBtr0307371|1|1);INTRON(MODIFIER||||2225|Cht6|protein_coding|CODING|FBtr0307372|1|1);INTRON(MODIFIER||||2574|Cht6|protein_coding|CODING|FBtr0307373|1|1);INTRON…	-
FBtr0307373	X_9919468_SNP	G	C	0.1081	4	33	1.44e-05	0.17651	SiteClass[FBgn0263132|Cht6|INTRON|0],TranscriptAnnot[INTRON(MODIFIER||||4611|Cht6|protein_coding|CODING|FBtr0307369|2|1);INTRON(MODIFIER||||1367|Cht6|protein_coding|CODING|FBtr0307370|1|1);INTRON(MODIFIER||||1580|Cht6|protein_coding|CODING|FBtr0307371|1|1);INTRON(MODIFIER||||2225|Cht6|protein_coding|CODING|FBtr0307372|1|1);INTRON(MODIFIER||||2574|Cht6|protein_coding|CODING|FBtr0307373|1|1);INTRON…	-
FBtr0307374	X_9919468_SNP	G	C	0.1081	4	33	1.44e-05	0.17651	SiteClass[FBgn0263132|Cht6|INTRON|0],TranscriptAnnot[INTRON(MODIFIER||||4611|Cht6|protein_coding|CODING|FBtr0307369|2|1);INTRON(MODIFIER||||1367|Cht6|protein_coding|CODING|FBtr0307370|1|1);INTRON(MODIFIER||||1580|Cht6|protein_coding|CODING|FBtr0307371|1|1);INTRON(MODIFIER||||2225|Cht6|protein_coding|CODING|FBtr0307372|1|1);INTRON(MODIFIER||||2574|Cht6|protein_coding|CODING|FBtr0307373|1|1);INTRON…	-
FBtr0307375	X_9919468_SNP	G	C	0.1081	4	33	1.44e-05	0.17651	SiteClass[FBgn0263132|Cht6|INTRON|0],TranscriptAnnot[INTRON(MODIFIER||||4611|Cht6|protein_coding|CODING|FBtr0307369|2|1);INTRON(MODIFIER||||1367|Cht6|protein_coding|CODING|FBtr0307370|1|1);INTRON(MODIFIER||||1580|Cht6|protein_coding|CODING|FBtr0307371|1|1);INTRON(MODIFIER||||2225|Cht6|protein_coding|CODING|FBtr0307372|1|1);INTRON(MODIFIER||||2574|Cht6|protein_coding|CODING|FBtr0307373|1|1);INTRON…	-
FBgn0038676	3R_14870364_SNP	T	C	0.1081	4	33	1.44e-05	0.17651	SiteClass[FBgn0038676|CG6026|UTR_3_PRIME|0;FBgn0004876|cdi|DOWNSTREAM|240],TranscriptAnnot[UTR_3_PRIME(MODIFIER||399||1555|CG6026|protein_coding|CODING|FBtr0273301|3|1);DOWNSTREAM(MODIFIER||240||942|cdi|protein_coding|CODING|FBtr0305321||1)]	This gene is referred to in FlyBase by the symbol Dmel\CG6026 (FBgn0038676). It is a protein_coding_gene from Drosophila melanogaster. It has one annotated transcript and one polypeptide. Gene sequence location is 3R:19033538..19044693. It has the cytological map location 91E4. Its molecular function is unknown. The biological processes in which it is involved are not known. 4 alleles are reporte…
FBgn0004876	3R_14870364_SNP	T	C	0.1081	4	33	1.44e-05	0.17651	SiteClass[FBgn0038676|CG6026|UTR_3_PRIME|0;FBgn0004876|cdi|DOWNSTREAM|240],TranscriptAnnot[UTR_3_PRIME(MODIFIER||399||1555|CG6026|protein_coding|CODING|FBtr0273301|3|1);DOWNSTREAM(MODIFIER||240||942|cdi|protein_coding|CODING|FBtr0305321||1)]	The gene center divider is referred to in FlyBase by the symbol Dmel\cdi (CG6027, FBgn0004876). It is a protein_coding_gene from Drosophila melanogaster. It has 2 annotated transcripts and 2 polypeptides (all unique). Gene sequence location is 3R:19044882..19094270. It has the cytological map location 91E4-91F1. Protein features are: Protein kinase domain; Protein kinase, ATP binding site; Protei…
FBtr0273301	3R_14870364_SNP	T	C	0.1081	4	33	1.44e-05	0.17651	SiteClass[FBgn0038676|CG6026|UTR_3_PRIME|0;FBgn0004876|cdi|DOWNSTREAM|240],TranscriptAnnot[UTR_3_PRIME(MODIFIER||399||1555|CG6026|protein_coding|CODING|FBtr0273301|3|1);DOWNSTREAM(MODIFIER||240||942|cdi|protein_coding|CODING|FBtr0305321||1)]	-
FBtr0305321	3R_14870364_SNP	T	C	0.1081	4	33	1.44e-05	0.17651	SiteClass[FBgn0038676|CG6026|UTR_3_PRIME|0;FBgn0004876|cdi|DOWNSTREAM|240],TranscriptAnnot[UTR_3_PRIME(MODIFIER||399||1555|CG6026|protein_coding|CODING|FBtr0273301|3|1);DOWNSTREAM(MODIFIER||240||942|cdi|protein_coding|CODING|FBtr0305321||1)]	-
FBgn0038676	3R_14870466_SNP	T	C	0.1081	4	33	1.44e-05	0.17651	SiteClass[FBgn0038676|CG6026|DOWNSTREAM|51;FBgn0004876|cdi|DOWNSTREAM|138],TranscriptAnnot[DOWNSTREAM(MODIFIER||138||942|cdi|protein_coding|CODING|FBtr0305321||1);DOWNSTREAM(MODIFIER||950||1213|cdi|protein_coding|CODING|FBtr0083716||1);DOWNSTREAM(MODIFIER||51||1555|CG6026|protein_coding|CODING|FBtr0273301||1);INTERGENIC(MODIFIER||||||||||1)]	This gene is referred to in FlyBase by the symbol Dmel\CG6026 (FBgn0038676). It is a protein_coding_gene from Drosophila melanogaster. It has one annotated transcript and one polypeptide. Gene sequence location is 3R:19033538..19044693. It has the cytological map location 91E4. Its molecular function is unknown. The biological processes in which it is involved are not known. 4 alleles are reporte…
FBgn0004876	3R_14870466_SNP	T	C	0.1081	4	33	1.44e-05	0.17651	SiteClass[FBgn0038676|CG6026|DOWNSTREAM|51;FBgn0004876|cdi|DOWNSTREAM|138],TranscriptAnnot[DOWNSTREAM(MODIFIER||138||942|cdi|protein_coding|CODING|FBtr0305321||1);DOWNSTREAM(MODIFIER||950||1213|cdi|protein_coding|CODING|FBtr0083716||1);DOWNSTREAM(MODIFIER||51||1555|CG6026|protein_coding|CODING|FBtr0273301||1);INTERGENIC(MODIFIER||||||||||1)]	The gene center divider is referred to in FlyBase by the symbol Dmel\cdi (CG6027, FBgn0004876). It is a protein_coding_gene from Drosophila melanogaster. It has 2 annotated transcripts and 2 polypeptides (all unique). Gene sequence location is 3R:19044882..19094270. It has the cytological map location 91E4-91F1. Protein features are: Protein kinase domain; Protein kinase, ATP binding site; Protei…
FBtr0305321	3R_14870466_SNP	T	C	0.1081	4	33	1.44e-05	0.17651	SiteClass[FBgn0038676|CG6026|DOWNSTREAM|51;FBgn0004876|cdi|DOWNSTREAM|138],TranscriptAnnot[DOWNSTREAM(MODIFIER||138||942|cdi|protein_coding|CODING|FBtr0305321||1);DOWNSTREAM(MODIFIER||950||1213|cdi|protein_coding|CODING|FBtr0083716||1);DOWNSTREAM(MODIFIER||51||1555|CG6026|protein_coding|CODING|FBtr0273301||1);INTERGENIC(MODIFIER||||||||||1)]	-
FBtr0083716	3R_14870466_SNP	T	C	0.1081	4	33	1.44e-05	0.17651	SiteClass[FBgn0038676|CG6026|DOWNSTREAM|51;FBgn0004876|cdi|DOWNSTREAM|138],TranscriptAnnot[DOWNSTREAM(MODIFIER||138||942|cdi|protein_coding|CODING|FBtr0305321||1);DOWNSTREAM(MODIFIER||950||1213|cdi|protein_coding|CODING|FBtr0083716||1);DOWNSTREAM(MODIFIER||51||1555|CG6026|protein_coding|CODING|FBtr0273301||1);INTERGENIC(MODIFIER||||||||||1)]	-
FBtr0273301	3R_14870466_SNP	T	C	0.1081	4	33	1.44e-05	0.17651	SiteClass[FBgn0038676|CG6026|DOWNSTREAM|51;FBgn0004876|cdi|DOWNSTREAM|138],TranscriptAnnot[DOWNSTREAM(MODIFIER||138||942|cdi|protein_coding|CODING|FBtr0305321||1);DOWNSTREAM(MODIFIER||950||1213|cdi|protein_coding|CODING|FBtr0083716||1);DOWNSTREAM(MODIFIER||51||1555|CG6026|protein_coding|CODING|FBtr0273301||1);INTERGENIC(MODIFIER||||||||||1)]	-
FBgn0005658	3L_6091514_SNP	C	T	0.1111	4	32	1.45e-05	0.176612	SiteClass[FBgn0005658|Ets65A|UTR_5_PRIME|0],TranscriptAnnot[UTR_5_PRIME(MODIFIER||2116||490|Ets65A|protein_coding|CODING|FBtr0077054|1|1)]	The gene Ets at 65A is referred to in FlyBase by the symbol Dmel\Ets65A (CG7018, FBgn0005658). It is a protein_coding_gene from Drosophila melanogaster. It has 5 annotated transcripts and 5 polypeptides (all unique). Gene sequence location is 3L:6097617..6123913. It has the cytological map location 65A6. Protein features are: Ets domain; Winged helix-turn-helix DNA-binding domain. Its molecular f…
FBtr0077054	3L_6091514_SNP	C	T	0.1111	4	32	1.45e-05	0.176612	SiteClass[FBgn0005658|Ets65A|UTR_5_PRIME|0],TranscriptAnnot[UTR_5_PRIME(MODIFIER||2116||490|Ets65A|protein_coding|CODING|FBtr0077054|1|1)]	-
FBgn0039766	3R_26250398_SNP	G	A	0.1176	4	30	1.48e-05	0.176634	SiteClass[FBgn0039766|CG15536|SYNONYMOUS_CODING|0;FBgn0039765|mRpS18C|DOWNSTREAM|120;FBgn0039764|CG15535|UPSTREAM|747;FBgn0039767|CG2218|DOWNSTREAM|751],TranscriptAnnot[SYNONYMOUS_CODING(LOW|SILENT|ggT/ggC|G154|188|CG15536|protein_coding|CODING|FBtr0085628|1|1);UPSTREAM(MODIFIER||747||118|CG15535|protein_coding|CODING|FBtr0085629||1);UPSTREAM(MODIFIER||747||118|CG15535|protein_coding|CODING|FBtr0…	This gene is referred to in FlyBase by the symbol Dmel\CG15536 (FBgn0039766). It is a protein_coding_gene from Drosophila melanogaster. It has one annotated transcript and one polypeptide. Gene sequence location is 3R:30424499..30425162. It has the cytological map location 99F4. Its molecular function is described by: . It is involved in the biological process described with: . 6 alleles are repo…
FBgn0039765	3R_26250398_SNP	G	A	0.1176	4	30	1.48e-05	0.176634	SiteClass[FBgn0039766|CG15536|SYNONYMOUS_CODING|0;FBgn0039765|mRpS18C|DOWNSTREAM|120;FBgn0039764|CG15535|UPSTREAM|747;FBgn0039767|CG2218|DOWNSTREAM|751],TranscriptAnnot[SYNONYMOUS_CODING(LOW|SILENT|ggT/ggC|G154|188|CG15536|protein_coding|CODING|FBtr0085628|1|1);UPSTREAM(MODIFIER||747||118|CG15535|protein_coding|CODING|FBtr0085629||1);UPSTREAM(MODIFIER||747||118|CG15535|protein_coding|CODING|FBtr0…	The gene mitochondrial ribosomal protein S18C is referred to in FlyBase by the symbol Dmel\mRpS18C (CG9688, FBgn0039765). It is a protein_coding_gene from Drosophila melanogaster. It has one annotated transcript and one polypeptide. Gene sequence location is 3R:30423974..30424556. It has the cytological map location 99F4. Protein features are: Ribosomal protein S18. Its molecular function is desc…
FBgn0039764	3R_26250398_SNP	G	A	0.1176	4	30	1.48e-05	0.176634	SiteClass[FBgn0039766|CG15536|SYNONYMOUS_CODING|0;FBgn0039765|mRpS18C|DOWNSTREAM|120;FBgn0039764|CG15535|UPSTREAM|747;FBgn0039767|CG2218|DOWNSTREAM|751],TranscriptAnnot[SYNONYMOUS_CODING(LOW|SILENT|ggT/ggC|G154|188|CG15536|protein_coding|CODING|FBtr0085628|1|1);UPSTREAM(MODIFIER||747||118|CG15535|protein_coding|CODING|FBtr0085629||1);UPSTREAM(MODIFIER||747||118|CG15535|protein_coding|CODING|FBtr0…	This gene is referred to in FlyBase by the symbol Dmel\CG15535 (FBgn0039764). It is a protein_coding_gene from Drosophila melanogaster. It has 2 annotated transcripts and 2 polypeptides (1 unique). Gene sequence location is 3R:30423032..30423929. It has the cytological map location 99F4. Protein features are: Fyv7/TAP26. Its molecular function is described by: . It is involved in the biological p…
FBgn0039767	3R_26250398_SNP	G	A	0.1176	4	30	1.48e-05	0.176634	SiteClass[FBgn0039766|CG15536|SYNONYMOUS_CODING|0;FBgn0039765|mRpS18C|DOWNSTREAM|120;FBgn0039764|CG15535|UPSTREAM|747;FBgn0039767|CG2218|DOWNSTREAM|751],TranscriptAnnot[SYNONYMOUS_CODING(LOW|SILENT|ggT/ggC|G154|188|CG15536|protein_coding|CODING|FBtr0085628|1|1);UPSTREAM(MODIFIER||747||118|CG15535|protein_coding|CODING|FBtr0085629||1);UPSTREAM(MODIFIER||747||118|CG15535|protein_coding|CODING|FBtr0…	This gene is referred to in FlyBase by the symbol Dmel\CG2218 (FBgn0039767). It is a protein_coding_gene from Drosophila melanogaster. It has 2 annotated transcripts and 2 polypeptides (1 unique). Gene sequence location is 3R:30425427..30428276. It has the cytological map location 99F4. Protein features are: U box domain; Zinc finger, RING-type, conserved site; Zinc finger, RING/FYVE/PHD-type. It…
FBtr0085628	3R_26250398_SNP	G	A	0.1176	4	30	1.48e-05	0.176634	SiteClass[FBgn0039766|CG15536|SYNONYMOUS_CODING|0;FBgn0039765|mRpS18C|DOWNSTREAM|120;FBgn0039764|CG15535|UPSTREAM|747;FBgn0039767|CG2218|DOWNSTREAM|751],TranscriptAnnot[SYNONYMOUS_CODING(LOW|SILENT|ggT/ggC|G154|188|CG15536|protein_coding|CODING|FBtr0085628|1|1);UPSTREAM(MODIFIER||747||118|CG15535|protein_coding|CODING|FBtr0085629||1);UPSTREAM(MODIFIER||747||118|CG15535|protein_coding|CODING|FBtr0…	-
FBtr0085629	3R_26250398_SNP	G	A	0.1176	4	30	1.48e-05	0.176634	SiteClass[FBgn0039766|CG15536|SYNONYMOUS_CODING|0;FBgn0039765|mRpS18C|DOWNSTREAM|120;FBgn0039764|CG15535|UPSTREAM|747;FBgn0039767|CG2218|DOWNSTREAM|751],TranscriptAnnot[SYNONYMOUS_CODING(LOW|SILENT|ggT/ggC|G154|188|CG15536|protein_coding|CODING|FBtr0085628|1|1);UPSTREAM(MODIFIER||747||118|CG15535|protein_coding|CODING|FBtr0085629||1);UPSTREAM(MODIFIER||747||118|CG15535|protein_coding|CODING|FBtr0…	-
FBtr0346511	3R_26250398_SNP	G	A	0.1176	4	30	1.48e-05	0.176634	SiteClass[FBgn0039766|CG15536|SYNONYMOUS_CODING|0;FBgn0039765|mRpS18C|DOWNSTREAM|120;FBgn0039764|CG15535|UPSTREAM|747;FBgn0039767|CG2218|DOWNSTREAM|751],TranscriptAnnot[SYNONYMOUS_CODING(LOW|SILENT|ggT/ggC|G154|188|CG15536|protein_coding|CODING|FBtr0085628|1|1);UPSTREAM(MODIFIER||747||118|CG15535|protein_coding|CODING|FBtr0085629||1);UPSTREAM(MODIFIER||747||118|CG15535|protein_coding|CODING|FBtr0…	-
FBtr0085627	3R_26250398_SNP	G	A	0.1176	4	30	1.48e-05	0.176634	SiteClass[FBgn0039766|CG15536|SYNONYMOUS_CODING|0;FBgn0039765|mRpS18C|DOWNSTREAM|120;FBgn0039764|CG15535|UPSTREAM|747;FBgn0039767|CG2218|DOWNSTREAM|751],TranscriptAnnot[SYNONYMOUS_CODING(LOW|SILENT|ggT/ggC|G154|188|CG15536|protein_coding|CODING|FBtr0085628|1|1);UPSTREAM(MODIFIER||747||118|CG15535|protein_coding|CODING|FBtr0085629||1);UPSTREAM(MODIFIER||747||118|CG15535|protein_coding|CODING|FBtr0…	-
FBtr0085625	3R_26250398_SNP	G	A	0.1176	4	30	1.48e-05	0.176634	SiteClass[FBgn0039766|CG15536|SYNONYMOUS_CODING|0;FBgn0039765|mRpS18C|DOWNSTREAM|120;FBgn0039764|CG15535|UPSTREAM|747;FBgn0039767|CG2218|DOWNSTREAM|751],TranscriptAnnot[SYNONYMOUS_CODING(LOW|SILENT|ggT/ggC|G154|188|CG15536|protein_coding|CODING|FBtr0085628|1|1);UPSTREAM(MODIFIER||747||118|CG15535|protein_coding|CODING|FBtr0085629||1);UPSTREAM(MODIFIER||747||118|CG15535|protein_coding|CODING|FBtr0…	-
FBtr0339142	3R_26250398_SNP	G	A	0.1176	4	30	1.48e-05	0.176634	SiteClass[FBgn0039766|CG15536|SYNONYMOUS_CODING|0;FBgn0039765|mRpS18C|DOWNSTREAM|120;FBgn0039764|CG15535|UPSTREAM|747;FBgn0039767|CG2218|DOWNSTREAM|751],TranscriptAnnot[SYNONYMOUS_CODING(LOW|SILENT|ggT/ggC|G154|188|CG15536|protein_coding|CODING|FBtr0085628|1|1);UPSTREAM(MODIFIER||747||118|CG15535|protein_coding|CODING|FBtr0085629||1);UPSTREAM(MODIFIER||747||118|CG15535|protein_coding|CODING|FBtr0…	-
FBgn0040660	2R_19270508_SNP	G	T	0.2222	8	28	1.49e-05	0.176908	SiteClass[FBgn0040660|CG13551|INTRON|0;FBgn0034856|yellow-d2|DOWNSTREAM|394;FBgn0266011|CR44784|UPSTREAM|498],TranscriptAnnot[UPSTREAM(MODIFIER||498|||CR44784|ncRNA|NON_CODING|FBtr0343203||1);DOWNSTREAM(MODIFIER||394||412|yellow-d2|protein_coding|CODING|FBtr0072012||1);INTRON(MODIFIER||||107|CG13551|protein_coding|CODING|FBtr0072033|2|1);INTRON(MODIFIER||||107|CG13551|protein_coding|CODING|FBtr00…	This gene is referred to in FlyBase by the symbol Dmel\CG13551 (FBgn0040660). It is a protein_coding_gene from Drosophila melanogaster. It has 2 annotated transcripts and 2 polypeptides (1 unique). Gene sequence location is 2R:23377866..23383424. It has the cytological map location 59D9. Protein features are: Mitochondrial ATPase inhibitor. Its molecular function is described by: ATPase inhibitor…
FBgn0034856	2R_19270508_SNP	G	T	0.2222	8	28	1.49e-05	0.176908	SiteClass[FBgn0040660|CG13551|INTRON|0;FBgn0034856|yellow-d2|DOWNSTREAM|394;FBgn0266011|CR44784|UPSTREAM|498],TranscriptAnnot[UPSTREAM(MODIFIER||498|||CR44784|ncRNA|NON_CODING|FBtr0343203||1);DOWNSTREAM(MODIFIER||394||412|yellow-d2|protein_coding|CODING|FBtr0072012||1);INTRON(MODIFIER||||107|CG13551|protein_coding|CODING|FBtr0072033|2|1);INTRON(MODIFIER||||107|CG13551|protein_coding|CODING|FBtr00…	The gene yellow-d2 is referred to in FlyBase by the symbol Dmel\yellow-d2 (CG9891, FBgn0034856). It is a protein_coding_gene from Drosophila melanogaster. It has one annotated transcript and one polypeptide. Gene sequence location is 2R:23381197..23382591. It has the cytological map location 59D9. Protein features are: Major royal jelly protein/Protein yellow; Six-bladed beta-propeller, TolB-like…
FBgn0266011	2R_19270508_SNP	G	T	0.2222	8	28	1.49e-05	0.176908	SiteClass[FBgn0040660|CG13551|INTRON|0;FBgn0034856|yellow-d2|DOWNSTREAM|394;FBgn0266011|CR44784|UPSTREAM|498],TranscriptAnnot[UPSTREAM(MODIFIER||498|||CR44784|ncRNA|NON_CODING|FBtr0343203||1);DOWNSTREAM(MODIFIER||394||412|yellow-d2|protein_coding|CODING|FBtr0072012||1);INTRON(MODIFIER||||107|CG13551|protein_coding|CODING|FBtr0072033|2|1);INTRON(MODIFIER||||107|CG13551|protein_coding|CODING|FBtr00…	This gene is referred to in FlyBase by the symbol Dmel\CR44784 (FBgn0266011). It is a non_protein_coding_gene from Drosophila melanogaster. It has one annotated transcript. Gene sequence location is 2R:23383483..23384177. It has the cytological map location 59D9. Its molecular function is unknown. The biological processes in which it is involved are not known. No alleles are reported.
FBtr0343203	2R_19270508_SNP	G	T	0.2222	8	28	1.49e-05	0.176908	SiteClass[FBgn0040660|CG13551|INTRON|0;FBgn0034856|yellow-d2|DOWNSTREAM|394;FBgn0266011|CR44784|UPSTREAM|498],TranscriptAnnot[UPSTREAM(MODIFIER||498|||CR44784|ncRNA|NON_CODING|FBtr0343203||1);DOWNSTREAM(MODIFIER||394||412|yellow-d2|protein_coding|CODING|FBtr0072012||1);INTRON(MODIFIER||||107|CG13551|protein_coding|CODING|FBtr0072033|2|1);INTRON(MODIFIER||||107|CG13551|protein_coding|CODING|FBtr00…	-
FBtr0072012	2R_19270508_SNP	G	T	0.2222	8	28	1.49e-05	0.176908	SiteClass[FBgn0040660|CG13551|INTRON|0;FBgn0034856|yellow-d2|DOWNSTREAM|394;FBgn0266011|CR44784|UPSTREAM|498],TranscriptAnnot[UPSTREAM(MODIFIER||498|||CR44784|ncRNA|NON_CODING|FBtr0343203||1);DOWNSTREAM(MODIFIER||394||412|yellow-d2|protein_coding|CODING|FBtr0072012||1);INTRON(MODIFIER||||107|CG13551|protein_coding|CODING|FBtr0072033|2|1);INTRON(MODIFIER||||107|CG13551|protein_coding|CODING|FBtr00…	-
FBtr0072033	2R_19270508_SNP	G	T	0.2222	8	28	1.49e-05	0.176908	SiteClass[FBgn0040660|CG13551|INTRON|0;FBgn0034856|yellow-d2|DOWNSTREAM|394;FBgn0266011|CR44784|UPSTREAM|498],TranscriptAnnot[UPSTREAM(MODIFIER||498|||CR44784|ncRNA|NON_CODING|FBtr0343203||1);DOWNSTREAM(MODIFIER||394||412|yellow-d2|protein_coding|CODING|FBtr0072012||1);INTRON(MODIFIER||||107|CG13551|protein_coding|CODING|FBtr0072033|2|1);INTRON(MODIFIER||||107|CG13551|protein_coding|CODING|FBtr00…	-
FBtr0072034	2R_19270508_SNP	G	T	0.2222	8	28	1.49e-05	0.176908	SiteClass[FBgn0040660|CG13551|INTRON|0;FBgn0034856|yellow-d2|DOWNSTREAM|394;FBgn0266011|CR44784|UPSTREAM|498],TranscriptAnnot[UPSTREAM(MODIFIER||498|||CR44784|ncRNA|NON_CODING|FBtr0343203||1);DOWNSTREAM(MODIFIER||394||412|yellow-d2|protein_coding|CODING|FBtr0072012||1);INTRON(MODIFIER||||107|CG13551|protein_coding|CODING|FBtr0072033|2|1);INTRON(MODIFIER||||107|CG13551|protein_coding|CODING|FBtr00…	-
FBgn0010328	3R_23085253_SNP	G	A	0.1176	4	30	1.55e-05	0.182719	SiteClass[FBgn0010328|woc|SYNONYMOUS_CODING|0;FBgn0264841|CR44049|UPSTREAM|519],TranscriptAnnot[SYNONYMOUS_CODING(LOW|SILENT|ggT/ggC|G1072|1687|woc|protein_coding|CODING|FBtr0334730|5|1);SYNONYMOUS_CODING(LOW|SILENT|ggT/ggC|G1087|1702|woc|protein_coding|CODING|FBtr0334731|6|1);SYNONYMOUS_CODING(LOW|SILENT|ggT/ggC|G97|712|woc|protein_coding|CODING|FBtr0308502|2|1);SYNONYMOUS_CODING(LOW|SILENT|ggT/…	The gene without children is referred to in FlyBase by the symbol Dmel\woc (CG5965, FBgn0010328). It is a protein_coding_gene from Drosophila melanogaster. It has 5 annotated transcripts and 5 polypeptides (all unique). Gene sequence location is 3R:27256595..27264055. It has the cytological map location 97E11. Protein features are: AT hook, DNA-binding motif; Protein of unknown function DUF3504; …
FBgn0264841	3R_23085253_SNP	G	A	0.1176	4	30	1.55e-05	0.182719	SiteClass[FBgn0010328|woc|SYNONYMOUS_CODING|0;FBgn0264841|CR44049|UPSTREAM|519],TranscriptAnnot[SYNONYMOUS_CODING(LOW|SILENT|ggT/ggC|G1072|1687|woc|protein_coding|CODING|FBtr0334730|5|1);SYNONYMOUS_CODING(LOW|SILENT|ggT/ggC|G1087|1702|woc|protein_coding|CODING|FBtr0334731|6|1);SYNONYMOUS_CODING(LOW|SILENT|ggT/ggC|G97|712|woc|protein_coding|CODING|FBtr0308502|2|1);SYNONYMOUS_CODING(LOW|SILENT|ggT/…	This gene is referred to in FlyBase by the symbol Dmel\CR44049 (FBgn0264841). It is a non_protein_coding_gene from Drosophila melanogaster. It has one annotated transcript. Gene sequence location is 3R:27260050..27261948. It has the cytological map location 97E11. Its molecular function is unknown. The biological processes in which it is involved are not known. No alleles are reported.
FBtr0334730	3R_23085253_SNP	G	A	0.1176	4	30	1.55e-05	0.182719	SiteClass[FBgn0010328|woc|SYNONYMOUS_CODING|0;FBgn0264841|CR44049|UPSTREAM|519],TranscriptAnnot[SYNONYMOUS_CODING(LOW|SILENT|ggT/ggC|G1072|1687|woc|protein_coding|CODING|FBtr0334730|5|1);SYNONYMOUS_CODING(LOW|SILENT|ggT/ggC|G1087|1702|woc|protein_coding|CODING|FBtr0334731|6|1);SYNONYMOUS_CODING(LOW|SILENT|ggT/ggC|G97|712|woc|protein_coding|CODING|FBtr0308502|2|1);SYNONYMOUS_CODING(LOW|SILENT|ggT/…	-
FBtr0334731	3R_23085253_SNP	G	A	0.1176	4	30	1.55e-05	0.182719	SiteClass[FBgn0010328|woc|SYNONYMOUS_CODING|0;FBgn0264841|CR44049|UPSTREAM|519],TranscriptAnnot[SYNONYMOUS_CODING(LOW|SILENT|ggT/ggC|G1072|1687|woc|protein_coding|CODING|FBtr0334730|5|1);SYNONYMOUS_CODING(LOW|SILENT|ggT/ggC|G1087|1702|woc|protein_coding|CODING|FBtr0334731|6|1);SYNONYMOUS_CODING(LOW|SILENT|ggT/ggC|G97|712|woc|protein_coding|CODING|FBtr0308502|2|1);SYNONYMOUS_CODING(LOW|SILENT|ggT/…	-
FBtr0308502	3R_23085253_SNP	G	A	0.1176	4	30	1.55e-05	0.182719	SiteClass[FBgn0010328|woc|SYNONYMOUS_CODING|0;FBgn0264841|CR44049|UPSTREAM|519],TranscriptAnnot[SYNONYMOUS_CODING(LOW|SILENT|ggT/ggC|G1072|1687|woc|protein_coding|CODING|FBtr0334730|5|1);SYNONYMOUS_CODING(LOW|SILENT|ggT/ggC|G1087|1702|woc|protein_coding|CODING|FBtr0334731|6|1);SYNONYMOUS_CODING(LOW|SILENT|ggT/ggC|G97|712|woc|protein_coding|CODING|FBtr0308502|2|1);SYNONYMOUS_CODING(LOW|SILENT|ggT/…	-
FBtr0112857	3R_23085253_SNP	G	A	0.1176	4	30	1.55e-05	0.182719	SiteClass[FBgn0010328|woc|SYNONYMOUS_CODING|0;FBgn0264841|CR44049|UPSTREAM|519],TranscriptAnnot[SYNONYMOUS_CODING(LOW|SILENT|ggT/ggC|G1072|1687|woc|protein_coding|CODING|FBtr0334730|5|1);SYNONYMOUS_CODING(LOW|SILENT|ggT/ggC|G1087|1702|woc|protein_coding|CODING|FBtr0334731|6|1);SYNONYMOUS_CODING(LOW|SILENT|ggT/ggC|G97|712|woc|protein_coding|CODING|FBtr0308502|2|1);SYNONYMOUS_CODING(LOW|SILENT|ggT/…	-
FBtr0085178	3R_23085253_SNP	G	A	0.1176	4	30	1.55e-05	0.182719	SiteClass[FBgn0010328|woc|SYNONYMOUS_CODING|0;FBgn0264841|CR44049|UPSTREAM|519],TranscriptAnnot[SYNONYMOUS_CODING(LOW|SILENT|ggT/ggC|G1072|1687|woc|protein_coding|CODING|FBtr0334730|5|1);SYNONYMOUS_CODING(LOW|SILENT|ggT/ggC|G1087|1702|woc|protein_coding|CODING|FBtr0334731|6|1);SYNONYMOUS_CODING(LOW|SILENT|ggT/ggC|G97|712|woc|protein_coding|CODING|FBtr0308502|2|1);SYNONYMOUS_CODING(LOW|SILENT|ggT/…	-
FBtr0334727	3R_23085253_SNP	G	A	0.1176	4	30	1.55e-05	0.182719	SiteClass[FBgn0010328|woc|SYNONYMOUS_CODING|0;FBgn0264841|CR44049|UPSTREAM|519],TranscriptAnnot[SYNONYMOUS_CODING(LOW|SILENT|ggT/ggC|G1072|1687|woc|protein_coding|CODING|FBtr0334730|5|1);SYNONYMOUS_CODING(LOW|SILENT|ggT/ggC|G1087|1702|woc|protein_coding|CODING|FBtr0334731|6|1);SYNONYMOUS_CODING(LOW|SILENT|ggT/ggC|G97|712|woc|protein_coding|CODING|FBtr0308502|2|1);SYNONYMOUS_CODING(LOW|SILENT|ggT/…	-
FBgn0053138	2R_9061760_SNP	C	T	0.1389	5	31	1.61e-05	0.187859	SiteClass[FBgn0053138|AGBE|SYNONYMOUS_CODING|0],TranscriptAnnot[SYNONYMOUS_CODING(LOW|SILENT|ctT/ctC|L554|685|AGBE|protein_coding|CODING|FBtr0087732|4|1)]	The gene 1,4-Alpha-Glucan Branching Enzyme is referred to in FlyBase by the symbol Dmel\AGBE (CG33138, FBgn0053138). It is a protein_coding_gene from Drosophila melanogaster. It has one annotated transcript and one polypeptide. Gene sequence location is 2R:13171401..13174796. It has the cytological map location 49F4. Protein features are: 1,4-alpha-glucan-branching enzyme, GlgB; Alpha-amylase/bra…
FBtr0087732	2R_9061760_SNP	C	T	0.1389	5	31	1.61e-05	0.187859	SiteClass[FBgn0053138|AGBE|SYNONYMOUS_CODING|0],TranscriptAnnot[SYNONYMOUS_CODING(LOW|SILENT|ctT/ctC|L554|685|AGBE|protein_coding|CODING|FBtr0087732|4|1)]	-
FBgn0028979	2L_22020508_SNP	T	C	0.1111	4	32	1.63e-05	0.188418	SiteClass[FBgn0028979|tio|INTRON|0;FBgn0053987|CR33987|DOWNSTREAM|254],TranscriptAnnot[DOWNSTREAM(MODIFIER||254|||CR33987|ncRNA|NON_CODING|FBtr0100032||1);DOWNSTREAM(MODIFIER||254|||CR33987|ncRNA|NON_CODING|FBtr0335390||1);INTRON(MODIFIER||||1024|tio|protein_coding|CODING|FBtr0089377|1|1);INTRON(MODIFIER||||1024|tio|protein_coding|CODING|FBtr0335391|1|1)]	The gene tiptop is referred to in FlyBase by the symbol Dmel\tio (CG12630, FBgn0028979). It is a protein_coding_gene from Drosophila melanogaster. It has 2 annotated transcripts and 2 polypeptides (1 unique). Gene sequence location is 2L:22019208..22025734. It has the cytological map location 40D3. Protein features are: Protein tiptop/teashirt; Teashirt family; Zinc finger, C2H2; Zinc finger, C2H…
FBgn0053987	2L_22020508_SNP	T	C	0.1111	4	32	1.63e-05	0.188418	SiteClass[FBgn0028979|tio|INTRON|0;FBgn0053987|CR33987|DOWNSTREAM|254],TranscriptAnnot[DOWNSTREAM(MODIFIER||254|||CR33987|ncRNA|NON_CODING|FBtr0100032||1);DOWNSTREAM(MODIFIER||254|||CR33987|ncRNA|NON_CODING|FBtr0335390||1);INTRON(MODIFIER||||1024|tio|protein_coding|CODING|FBtr0089377|1|1);INTRON(MODIFIER||||1024|tio|protein_coding|CODING|FBtr0335391|1|1)]	This gene is referred to in FlyBase by the symbol Dmel\CR33987 (FBgn0053987). It is a non_protein_coding_gene from Drosophila melanogaster. It has 2 annotated transcripts. Gene sequence location is 2L:22019208..22020254. It has the cytological map location 40D3. Its molecular function is described by: . It is involved in the biological process described with: . One allele is reported. No phenotyp…
FBtr0100032	2L_22020508_SNP	T	C	0.1111	4	32	1.63e-05	0.188418	SiteClass[FBgn0028979|tio|INTRON|0;FBgn0053987|CR33987|DOWNSTREAM|254],TranscriptAnnot[DOWNSTREAM(MODIFIER||254|||CR33987|ncRNA|NON_CODING|FBtr0100032||1);DOWNSTREAM(MODIFIER||254|||CR33987|ncRNA|NON_CODING|FBtr0335390||1);INTRON(MODIFIER||||1024|tio|protein_coding|CODING|FBtr0089377|1|1);INTRON(MODIFIER||||1024|tio|protein_coding|CODING|FBtr0335391|1|1)]	-
FBtr0335390	2L_22020508_SNP	T	C	0.1111	4	32	1.63e-05	0.188418	SiteClass[FBgn0028979|tio|INTRON|0;FBgn0053987|CR33987|DOWNSTREAM|254],TranscriptAnnot[DOWNSTREAM(MODIFIER||254|||CR33987|ncRNA|NON_CODING|FBtr0100032||1);DOWNSTREAM(MODIFIER||254|||CR33987|ncRNA|NON_CODING|FBtr0335390||1);INTRON(MODIFIER||||1024|tio|protein_coding|CODING|FBtr0089377|1|1);INTRON(MODIFIER||||1024|tio|protein_coding|CODING|FBtr0335391|1|1)]	-
FBtr0089377	2L_22020508_SNP	T	C	0.1111	4	32	1.63e-05	0.188418	SiteClass[FBgn0028979|tio|INTRON|0;FBgn0053987|CR33987|DOWNSTREAM|254],TranscriptAnnot[DOWNSTREAM(MODIFIER||254|||CR33987|ncRNA|NON_CODING|FBtr0100032||1);DOWNSTREAM(MODIFIER||254|||CR33987|ncRNA|NON_CODING|FBtr0335390||1);INTRON(MODIFIER||||1024|tio|protein_coding|CODING|FBtr0089377|1|1);INTRON(MODIFIER||||1024|tio|protein_coding|CODING|FBtr0335391|1|1)]	-
FBtr0335391	2L_22020508_SNP	T	C	0.1111	4	32	1.63e-05	0.188418	SiteClass[FBgn0028979|tio|INTRON|0;FBgn0053987|CR33987|DOWNSTREAM|254],TranscriptAnnot[DOWNSTREAM(MODIFIER||254|||CR33987|ncRNA|NON_CODING|FBtr0100032||1);DOWNSTREAM(MODIFIER||254|||CR33987|ncRNA|NON_CODING|FBtr0335390||1);INTRON(MODIFIER||||1024|tio|protein_coding|CODING|FBtr0089377|1|1);INTRON(MODIFIER||||1024|tio|protein_coding|CODING|FBtr0335391|1|1)]	-
FBgn0000439	3R_2616894_SNP	G	A	0.1429	5	30	1.73e-05	0.190255	SiteClass[FBgn0000439|Dfd|UPSTREAM|664],TranscriptAnnot[UPSTREAM(MODIFIER||664||586|Dfd|protein_coding|CODING|FBtr0081621||1);INTERGENIC(MODIFIER||||||||||1)]	The gene Deformed is referred to in FlyBase by the symbol Dmel\Dfd (CG2189, FBgn0000439). It is a protein_coding_gene from Drosophila melanogaster. It has one annotated transcript and one polypeptide. Gene sequence location is 3R:6791836..6802428. It has the cytological map location 84A5. Protein features are: Homeobox domain; Homeobox protein, antennapedia type; Homeobox protein, antennapedia ty…
FBtr0081621	3R_2616894_SNP	G	A	0.1429	5	30	1.73e-05	0.190255	SiteClass[FBgn0000439|Dfd|UPSTREAM|664],TranscriptAnnot[UPSTREAM(MODIFIER||664||586|Dfd|protein_coding|CODING|FBtr0081621||1);INTERGENIC(MODIFIER||||||||||1)]	-
FBgn0010328	3R_23085199_SNP	G	A	0.1111	4	32	1.73e-05	0.190255	SiteClass[FBgn0010328|woc|SYNONYMOUS_CODING|0;FBgn0264841|CR44049|UPSTREAM|573],TranscriptAnnot[SYNONYMOUS_CODING(LOW|SILENT|gaT/gaC|D1090|1687|woc|protein_coding|CODING|FBtr0334730|5|1);SYNONYMOUS_CODING(LOW|SILENT|gaT/gaC|D1105|1702|woc|protein_coding|CODING|FBtr0334731|6|1);SYNONYMOUS_CODING(LOW|SILENT|gaT/gaC|D115|712|woc|protein_coding|CODING|FBtr0308502|2|1);SYNONYMOUS_CODING(LOW|SILENT|gaT…	The gene without children is referred to in FlyBase by the symbol Dmel\woc (CG5965, FBgn0010328). It is a protein_coding_gene from Drosophila melanogaster. It has 5 annotated transcripts and 5 polypeptides (all unique). Gene sequence location is 3R:27256595..27264055. It has the cytological map location 97E11. Protein features are: AT hook, DNA-binding motif; Protein of unknown function DUF3504; …
FBgn0264841	3R_23085199_SNP	G	A	0.1111	4	32	1.73e-05	0.190255	SiteClass[FBgn0010328|woc|SYNONYMOUS_CODING|0;FBgn0264841|CR44049|UPSTREAM|573],TranscriptAnnot[SYNONYMOUS_CODING(LOW|SILENT|gaT/gaC|D1090|1687|woc|protein_coding|CODING|FBtr0334730|5|1);SYNONYMOUS_CODING(LOW|SILENT|gaT/gaC|D1105|1702|woc|protein_coding|CODING|FBtr0334731|6|1);SYNONYMOUS_CODING(LOW|SILENT|gaT/gaC|D115|712|woc|protein_coding|CODING|FBtr0308502|2|1);SYNONYMOUS_CODING(LOW|SILENT|gaT…	This gene is referred to in FlyBase by the symbol Dmel\CR44049 (FBgn0264841). It is a non_protein_coding_gene from Drosophila melanogaster. It has one annotated transcript. Gene sequence location is 3R:27260050..27261948. It has the cytological map location 97E11. Its molecular function is unknown. The biological processes in which it is involved are not known. No alleles are reported.
FBtr0334730	3R_23085199_SNP	G	A	0.1111	4	32	1.73e-05	0.190255	SiteClass[FBgn0010328|woc|SYNONYMOUS_CODING|0;FBgn0264841|CR44049|UPSTREAM|573],TranscriptAnnot[SYNONYMOUS_CODING(LOW|SILENT|gaT/gaC|D1090|1687|woc|protein_coding|CODING|FBtr0334730|5|1);SYNONYMOUS_CODING(LOW|SILENT|gaT/gaC|D1105|1702|woc|protein_coding|CODING|FBtr0334731|6|1);SYNONYMOUS_CODING(LOW|SILENT|gaT/gaC|D115|712|woc|protein_coding|CODING|FBtr0308502|2|1);SYNONYMOUS_CODING(LOW|SILENT|gaT…	-
FBtr0334731	3R_23085199_SNP	G	A	0.1111	4	32	1.73e-05	0.190255	SiteClass[FBgn0010328|woc|SYNONYMOUS_CODING|0;FBgn0264841|CR44049|UPSTREAM|573],TranscriptAnnot[SYNONYMOUS_CODING(LOW|SILENT|gaT/gaC|D1090|1687|woc|protein_coding|CODING|FBtr0334730|5|1);SYNONYMOUS_CODING(LOW|SILENT|gaT/gaC|D1105|1702|woc|protein_coding|CODING|FBtr0334731|6|1);SYNONYMOUS_CODING(LOW|SILENT|gaT/gaC|D115|712|woc|protein_coding|CODING|FBtr0308502|2|1);SYNONYMOUS_CODING(LOW|SILENT|gaT…	-
FBtr0308502	3R_23085199_SNP	G	A	0.1111	4	32	1.73e-05	0.190255	SiteClass[FBgn0010328|woc|SYNONYMOUS_CODING|0;FBgn0264841|CR44049|UPSTREAM|573],TranscriptAnnot[SYNONYMOUS_CODING(LOW|SILENT|gaT/gaC|D1090|1687|woc|protein_coding|CODING|FBtr0334730|5|1);SYNONYMOUS_CODING(LOW|SILENT|gaT/gaC|D1105|1702|woc|protein_coding|CODING|FBtr0334731|6|1);SYNONYMOUS_CODING(LOW|SILENT|gaT/gaC|D115|712|woc|protein_coding|CODING|FBtr0308502|2|1);SYNONYMOUS_CODING(LOW|SILENT|gaT…	-
FBtr0112857	3R_23085199_SNP	G	A	0.1111	4	32	1.73e-05	0.190255	SiteClass[FBgn0010328|woc|SYNONYMOUS_CODING|0;FBgn0264841|CR44049|UPSTREAM|573],TranscriptAnnot[SYNONYMOUS_CODING(LOW|SILENT|gaT/gaC|D1090|1687|woc|protein_coding|CODING|FBtr0334730|5|1);SYNONYMOUS_CODING(LOW|SILENT|gaT/gaC|D1105|1702|woc|protein_coding|CODING|FBtr0334731|6|1);SYNONYMOUS_CODING(LOW|SILENT|gaT/gaC|D115|712|woc|protein_coding|CODING|FBtr0308502|2|1);SYNONYMOUS_CODING(LOW|SILENT|gaT…	-
FBtr0085178	3R_23085199_SNP	G	A	0.1111	4	32	1.73e-05	0.190255	SiteClass[FBgn0010328|woc|SYNONYMOUS_CODING|0;FBgn0264841|CR44049|UPSTREAM|573],TranscriptAnnot[SYNONYMOUS_CODING(LOW|SILENT|gaT/gaC|D1090|1687|woc|protein_coding|CODING|FBtr0334730|5|1);SYNONYMOUS_CODING(LOW|SILENT|gaT/gaC|D1105|1702|woc|protein_coding|CODING|FBtr0334731|6|1);SYNONYMOUS_CODING(LOW|SILENT|gaT/gaC|D115|712|woc|protein_coding|CODING|FBtr0308502|2|1);SYNONYMOUS_CODING(LOW|SILENT|gaT…	-
FBtr0334727	3R_23085199_SNP	G	A	0.1111	4	32	1.73e-05	0.190255	SiteClass[FBgn0010328|woc|SYNONYMOUS_CODING|0;FBgn0264841|CR44049|UPSTREAM|573],TranscriptAnnot[SYNONYMOUS_CODING(LOW|SILENT|gaT/gaC|D1090|1687|woc|protein_coding|CODING|FBtr0334730|5|1);SYNONYMOUS_CODING(LOW|SILENT|gaT/gaC|D1105|1702|woc|protein_coding|CODING|FBtr0334731|6|1);SYNONYMOUS_CODING(LOW|SILENT|gaT/gaC|D115|712|woc|protein_coding|CODING|FBtr0308502|2|1);SYNONYMOUS_CODING(LOW|SILENT|gaT…	-
FBgn0000317	2L_15055419_SNP	T	C	0.1081	4	33	1.77e-05	0.190255	SiteClass[FBgn0000317|ck|INTRON|0],TranscriptAnnot[INTRON(MODIFIER||||2167|ck|protein_coding|CODING|FBtr0080724|1|1);INTRON(MODIFIER||||2167|ck|protein_coding|CODING|FBtr0343687|1|1);INTRON(MODIFIER||||2167|ck|protein_coding|CODING|FBtr0080723|1|1);INTRON(MODIFIER||||2167|ck|protein_coding|CODING|FBtr0343686|1|1)]	The gene crinkled is referred to in FlyBase by the symbol Dmel\ck (CG7595, FBgn0000317). It is a protein_coding_gene from Drosophila melanogaster. It has 4 annotated transcripts and 4 polypeptides (1 unique). Gene sequence location is 2L:15044963..15057862. It has the cytological map location 35B8-35B9. Protein features are: Band 4.1 domain; FERM central domain; FERM domain; FERM/acyl-CoA-binding…
FBtr0080724	2L_15055419_SNP	T	C	0.1081	4	33	1.77e-05	0.190255	SiteClass[FBgn0000317|ck|INTRON|0],TranscriptAnnot[INTRON(MODIFIER||||2167|ck|protein_coding|CODING|FBtr0080724|1|1);INTRON(MODIFIER||||2167|ck|protein_coding|CODING|FBtr0343687|1|1);INTRON(MODIFIER||||2167|ck|protein_coding|CODING|FBtr0080723|1|1);INTRON(MODIFIER||||2167|ck|protein_coding|CODING|FBtr0343686|1|1)]	-
FBtr0343687	2L_15055419_SNP	T	C	0.1081	4	33	1.77e-05	0.190255	SiteClass[FBgn0000317|ck|INTRON|0],TranscriptAnnot[INTRON(MODIFIER||||2167|ck|protein_coding|CODING|FBtr0080724|1|1);INTRON(MODIFIER||||2167|ck|protein_coding|CODING|FBtr0343687|1|1);INTRON(MODIFIER||||2167|ck|protein_coding|CODING|FBtr0080723|1|1);INTRON(MODIFIER||||2167|ck|protein_coding|CODING|FBtr0343686|1|1)]	-
FBtr0080723	2L_15055419_SNP	T	C	0.1081	4	33	1.77e-05	0.190255	SiteClass[FBgn0000317|ck|INTRON|0],TranscriptAnnot[INTRON(MODIFIER||||2167|ck|protein_coding|CODING|FBtr0080724|1|1);INTRON(MODIFIER||||2167|ck|protein_coding|CODING|FBtr0343687|1|1);INTRON(MODIFIER||||2167|ck|protein_coding|CODING|FBtr0080723|1|1);INTRON(MODIFIER||||2167|ck|protein_coding|CODING|FBtr0343686|1|1)]	-
FBtr0343686	2L_15055419_SNP	T	C	0.1081	4	33	1.77e-05	0.190255	SiteClass[FBgn0000317|ck|INTRON|0],TranscriptAnnot[INTRON(MODIFIER||||2167|ck|protein_coding|CODING|FBtr0080724|1|1);INTRON(MODIFIER||||2167|ck|protein_coding|CODING|FBtr0343687|1|1);INTRON(MODIFIER||||2167|ck|protein_coding|CODING|FBtr0080723|1|1);INTRON(MODIFIER||||2167|ck|protein_coding|CODING|FBtr0343686|1|1)]	-
FBgn0051935	2L_1608542_SNP	C	T	0.1111	4	32	1.79e-05	0.191491	SiteClass[FBgn0051935|CG31935|INTRON|0;FBgn0261509|haf|DOWNSTREAM|138],TranscriptAnnot[DOWNSTREAM(MODIFIER||138||981|haf|protein_coding|CODING|FBtr0310017||1);DOWNSTREAM(MODIFIER||138||982|haf|protein_coding|CODING|FBtr0310018||1);DOWNSTREAM(MODIFIER||138||981|haf|protein_coding|CODING|FBtr0310019||1);DOWNSTREAM(MODIFIER||138||982|haf|protein_coding|CODING|FBtr0310020||1);DOWNSTREAM(MODIFIER||138…	This gene is referred to in FlyBase by the symbol Dmel\CG31935 (FBgn0051935). It is a protein_coding_gene from Drosophila melanogaster. It has one annotated transcript and one polypeptide. Gene sequence location is 2L:1594822..1611157. It has the cytological map location 22A3. Protein features are: Rab3 GTPase-activating protein catalytic subunit. Its molecular function is described by: GTPase ac…
FBgn0261509	2L_1608542_SNP	C	T	0.1111	4	32	1.79e-05	0.191491	SiteClass[FBgn0051935|CG31935|INTRON|0;FBgn0261509|haf|DOWNSTREAM|138],TranscriptAnnot[DOWNSTREAM(MODIFIER||138||981|haf|protein_coding|CODING|FBtr0310017||1);DOWNSTREAM(MODIFIER||138||982|haf|protein_coding|CODING|FBtr0310018||1);DOWNSTREAM(MODIFIER||138||981|haf|protein_coding|CODING|FBtr0310019||1);DOWNSTREAM(MODIFIER||138||982|haf|protein_coding|CODING|FBtr0310020||1);DOWNSTREAM(MODIFIER||138…	The gene hattifattener is referred to in FlyBase by the symbol Dmel\haf (CG14351, FBgn0261509). It is a protein_coding_gene from Drosophila melanogaster. It has 5 annotated transcripts and 5 polypeptides (3 unique). Gene sequence location is 2L:1555129..1608404. It has the cytological map location 22A3. Protein features are: Leucine-rich repeat; Leucine-rich repeat domain, L domain-like; Leucine-…
FBtr0310017	2L_1608542_SNP	C	T	0.1111	4	32	1.79e-05	0.191491	SiteClass[FBgn0051935|CG31935|INTRON|0;FBgn0261509|haf|DOWNSTREAM|138],TranscriptAnnot[DOWNSTREAM(MODIFIER||138||981|haf|protein_coding|CODING|FBtr0310017||1);DOWNSTREAM(MODIFIER||138||982|haf|protein_coding|CODING|FBtr0310018||1);DOWNSTREAM(MODIFIER||138||981|haf|protein_coding|CODING|FBtr0310019||1);DOWNSTREAM(MODIFIER||138||982|haf|protein_coding|CODING|FBtr0310020||1);DOWNSTREAM(MODIFIER||138…	-
FBtr0310018	2L_1608542_SNP	C	T	0.1111	4	32	1.79e-05	0.191491	SiteClass[FBgn0051935|CG31935|INTRON|0;FBgn0261509|haf|DOWNSTREAM|138],TranscriptAnnot[DOWNSTREAM(MODIFIER||138||981|haf|protein_coding|CODING|FBtr0310017||1);DOWNSTREAM(MODIFIER||138||982|haf|protein_coding|CODING|FBtr0310018||1);DOWNSTREAM(MODIFIER||138||981|haf|protein_coding|CODING|FBtr0310019||1);DOWNSTREAM(MODIFIER||138||982|haf|protein_coding|CODING|FBtr0310020||1);DOWNSTREAM(MODIFIER||138…	-
FBtr0310019	2L_1608542_SNP	C	T	0.1111	4	32	1.79e-05	0.191491	SiteClass[FBgn0051935|CG31935|INTRON|0;FBgn0261509|haf|DOWNSTREAM|138],TranscriptAnnot[DOWNSTREAM(MODIFIER||138||981|haf|protein_coding|CODING|FBtr0310017||1);DOWNSTREAM(MODIFIER||138||982|haf|protein_coding|CODING|FBtr0310018||1);DOWNSTREAM(MODIFIER||138||981|haf|protein_coding|CODING|FBtr0310019||1);DOWNSTREAM(MODIFIER||138||982|haf|protein_coding|CODING|FBtr0310020||1);DOWNSTREAM(MODIFIER||138…	-
FBtr0310020	2L_1608542_SNP	C	T	0.1111	4	32	1.79e-05	0.191491	SiteClass[FBgn0051935|CG31935|INTRON|0;FBgn0261509|haf|DOWNSTREAM|138],TranscriptAnnot[DOWNSTREAM(MODIFIER||138||981|haf|protein_coding|CODING|FBtr0310017||1);DOWNSTREAM(MODIFIER||138||982|haf|protein_coding|CODING|FBtr0310018||1);DOWNSTREAM(MODIFIER||138||981|haf|protein_coding|CODING|FBtr0310019||1);DOWNSTREAM(MODIFIER||138||982|haf|protein_coding|CODING|FBtr0310020||1);DOWNSTREAM(MODIFIER||138…	-
FBtr0344146	2L_1608542_SNP	C	T	0.1111	4	32	1.79e-05	0.191491	SiteClass[FBgn0051935|CG31935|INTRON|0;FBgn0261509|haf|DOWNSTREAM|138],TranscriptAnnot[DOWNSTREAM(MODIFIER||138||981|haf|protein_coding|CODING|FBtr0310017||1);DOWNSTREAM(MODIFIER||138||982|haf|protein_coding|CODING|FBtr0310018||1);DOWNSTREAM(MODIFIER||138||981|haf|protein_coding|CODING|FBtr0310019||1);DOWNSTREAM(MODIFIER||138||982|haf|protein_coding|CODING|FBtr0310020||1);DOWNSTREAM(MODIFIER||138…	-
FBtr0077916	2L_1608542_SNP	C	T	0.1111	4	32	1.79e-05	0.191491	SiteClass[FBgn0051935|CG31935|INTRON|0;FBgn0261509|haf|DOWNSTREAM|138],TranscriptAnnot[DOWNSTREAM(MODIFIER||138||981|haf|protein_coding|CODING|FBtr0310017||1);DOWNSTREAM(MODIFIER||138||982|haf|protein_coding|CODING|FBtr0310018||1);DOWNSTREAM(MODIFIER||138||981|haf|protein_coding|CODING|FBtr0310019||1);DOWNSTREAM(MODIFIER||138||982|haf|protein_coding|CODING|FBtr0310020||1);DOWNSTREAM(MODIFIER||138…	-
FBgn0001085	3L_14353938_SNP	T	A	0.1389	5	31	1.81e-05	0.192641	SiteClass[FBgn0001085|fz|INTRON|0],TranscriptAnnot[INTRON(MODIFIER||||581|fz|protein_coding|CODING|FBtr0075743|4|1);INTRON(MODIFIER||||612|fz|protein_coding|CODING|FBtr0330102|4|1)]	The gene frizzled is referred to in FlyBase by the symbol Dmel\fz (CG17697, FBgn0001085). It is a protein_coding_gene from Drosophila melanogaster. It has 2 annotated transcripts and 2 polypeptides (all unique). Gene sequence location is 3L:14274343..14368639. It has the cytological map location 70D4-70D5. Protein features are: Frizzled domain; Frizzled protein; Frizzled, invertebrates; Frizzled/…
FBtr0075743	3L_14353938_SNP	T	A	0.1389	5	31	1.81e-05	0.192641	SiteClass[FBgn0001085|fz|INTRON|0],TranscriptAnnot[INTRON(MODIFIER||||581|fz|protein_coding|CODING|FBtr0075743|4|1);INTRON(MODIFIER||||612|fz|protein_coding|CODING|FBtr0330102|4|1)]	-
FBtr0330102	3L_14353938_SNP	T	A	0.1389	5	31	1.81e-05	0.192641	SiteClass[FBgn0001085|fz|INTRON|0],TranscriptAnnot[INTRON(MODIFIER||||581|fz|protein_coding|CODING|FBtr0075743|4|1);INTRON(MODIFIER||||612|fz|protein_coding|CODING|FBtr0330102|4|1)]	-
FBgn0261503	3R_2641530_SNP	A	G	0.1389	5	31	1.86e-05	0.193884	SiteClass[FBgn0261503|CR42651|INTRON|0],TranscriptAnnot[INTRON(MODIFIER|||||CR42651|ncRNA|NON_CODING|FBtr0334273|1|1)]	This gene is referred to in FlyBase by the symbol Dmel\CR42651 (FBgn0261503). It is a non_protein_coding_gene from Drosophila melanogaster. It has one annotated transcript. Gene sequence location is 3R:6808796..6816379. It has the cytological map location 84A5. Its molecular function is unknown. The biological processes in which it is involved are not known. No alleles are reported. Summary of mo…
FBtr0334273	3R_2641530_SNP	A	G	0.1389	5	31	1.86e-05	0.193884	SiteClass[FBgn0261503|CR42651|INTRON|0],TranscriptAnnot[INTRON(MODIFIER|||||CR42651|ncRNA|NON_CODING|FBtr0334273|1|1)]	-
FBgn0051481	3R_2549529_SNP	G	C	0.1429	5	30	1.88e-05	0.193884	SiteClass[FBgn0051481|pb|INTRON|0],TranscriptAnnot[INTRON(MODIFIER||||777|pb|protein_coding|CODING|FBtr0089277|3|1);INTRON(MODIFIER||||772|pb|protein_coding|CODING|FBtr0089279|2|1);INTRON(MODIFIER||||782|pb|protein_coding|CODING|FBtr0089276|3|1);INTRON(MODIFIER||||777|pb|protein_coding|CODING|FBtr0089278|2|1)]	The gene proboscipedia is referred to in FlyBase by the symbol Dmel\pb (CG31481, FBgn0051481). It is a protein_coding_gene from Drosophila melanogaster. It has 4 annotated transcripts and 4 polypeptides (all unique). Gene sequence location is 3R:6707800..6742063. It has the cytological map location 84A5. Protein features are: Homeobox domain; Homeobox protein, antennapedia type, conserved site; H…
FBtr0089277	3R_2549529_SNP	G	C	0.1429	5	30	1.88e-05	0.193884	SiteClass[FBgn0051481|pb|INTRON|0],TranscriptAnnot[INTRON(MODIFIER||||777|pb|protein_coding|CODING|FBtr0089277|3|1);INTRON(MODIFIER||||772|pb|protein_coding|CODING|FBtr0089279|2|1);INTRON(MODIFIER||||782|pb|protein_coding|CODING|FBtr0089276|3|1);INTRON(MODIFIER||||777|pb|protein_coding|CODING|FBtr0089278|2|1)]	-
FBtr0089279	3R_2549529_SNP	G	C	0.1429	5	30	1.88e-05	0.193884	SiteClass[FBgn0051481|pb|INTRON|0],TranscriptAnnot[INTRON(MODIFIER||||777|pb|protein_coding|CODING|FBtr0089277|3|1);INTRON(MODIFIER||||772|pb|protein_coding|CODING|FBtr0089279|2|1);INTRON(MODIFIER||||782|pb|protein_coding|CODING|FBtr0089276|3|1);INTRON(MODIFIER||||777|pb|protein_coding|CODING|FBtr0089278|2|1)]	-
FBtr0089276	3R_2549529_SNP	G	C	0.1429	5	30	1.88e-05	0.193884	SiteClass[FBgn0051481|pb|INTRON|0],TranscriptAnnot[INTRON(MODIFIER||||777|pb|protein_coding|CODING|FBtr0089277|3|1);INTRON(MODIFIER||||772|pb|protein_coding|CODING|FBtr0089279|2|1);INTRON(MODIFIER||||782|pb|protein_coding|CODING|FBtr0089276|3|1);INTRON(MODIFIER||||777|pb|protein_coding|CODING|FBtr0089278|2|1)]	-
FBtr0089278	3R_2549529_SNP	G	C	0.1429	5	30	1.88e-05	0.193884	SiteClass[FBgn0051481|pb|INTRON|0],TranscriptAnnot[INTRON(MODIFIER||||777|pb|protein_coding|CODING|FBtr0089277|3|1);INTRON(MODIFIER||||772|pb|protein_coding|CODING|FBtr0089279|2|1);INTRON(MODIFIER||||782|pb|protein_coding|CODING|FBtr0089276|3|1);INTRON(MODIFIER||||777|pb|protein_coding|CODING|FBtr0089278|2|1)]	-
FBgn0031645	2L_4895539_SNP	T	A	0.1081	4	33	1.92e-05	0.193884	SiteClass[FBgn0031645|CG3036|INTRON|0],TranscriptAnnot[INTRON(MODIFIER||||493|CG3036|protein_coding|CODING|FBtr0077391|2|1);INTRON(MODIFIER||||493|CG3036|protein_coding|CODING|FBtr0336832|2|1)]	This gene is referred to in FlyBase by the symbol Dmel\CG3036 (FBgn0031645). It is a protein_coding_gene from Drosophila melanogaster. It has 2 annotated transcripts and 2 polypeptides (1 unique). Gene sequence location is 2L:4892112..4903889. It has the cytological map location 25B1-25B2. Protein features are: Major facilitator superfamily; Major facilitator superfamily domain. Its molecular fun…
FBtr0077391	2L_4895539_SNP	T	A	0.1081	4	33	1.92e-05	0.193884	SiteClass[FBgn0031645|CG3036|INTRON|0],TranscriptAnnot[INTRON(MODIFIER||||493|CG3036|protein_coding|CODING|FBtr0077391|2|1);INTRON(MODIFIER||||493|CG3036|protein_coding|CODING|FBtr0336832|2|1)]	-
FBtr0336832	2L_4895539_SNP	T	A	0.1081	4	33	1.92e-05	0.193884	SiteClass[FBgn0031645|CG3036|INTRON|0],TranscriptAnnot[INTRON(MODIFIER||||493|CG3036|protein_coding|CODING|FBtr0077391|2|1);INTRON(MODIFIER||||493|CG3036|protein_coding|CODING|FBtr0336832|2|1)]	-
FBgn0031645	2L_4895541_SNP	T	A	0.1081	4	33	1.92e-05	0.193884	SiteClass[FBgn0031645|CG3036|INTRON|0],TranscriptAnnot[INTRON(MODIFIER||||493|CG3036|protein_coding|CODING|FBtr0077391|2|1);INTRON(MODIFIER||||493|CG3036|protein_coding|CODING|FBtr0336832|2|1)]	This gene is referred to in FlyBase by the symbol Dmel\CG3036 (FBgn0031645). It is a protein_coding_gene from Drosophila melanogaster. It has 2 annotated transcripts and 2 polypeptides (1 unique). Gene sequence location is 2L:4892112..4903889. It has the cytological map location 25B1-25B2. Protein features are: Major facilitator superfamily; Major facilitator superfamily domain. Its molecular fun…
FBtr0077391	2L_4895541_SNP	T	A	0.1081	4	33	1.92e-05	0.193884	SiteClass[FBgn0031645|CG3036|INTRON|0],TranscriptAnnot[INTRON(MODIFIER||||493|CG3036|protein_coding|CODING|FBtr0077391|2|1);INTRON(MODIFIER||||493|CG3036|protein_coding|CODING|FBtr0336832|2|1)]	-
FBtr0336832	2L_4895541_SNP	T	A	0.1081	4	33	1.92e-05	0.193884	SiteClass[FBgn0031645|CG3036|INTRON|0],TranscriptAnnot[INTRON(MODIFIER||||493|CG3036|protein_coding|CODING|FBtr0077391|2|1);INTRON(MODIFIER||||493|CG3036|protein_coding|CODING|FBtr0336832|2|1)]	-
FBgn0261579	3L_21763837_SNP	G	A	0.1081	4	33	1.92e-05	0.193884	SiteClass[FBgn0261579|CG42689|INTRON|0;FBgn0037133|CG7370|UTR_3_PRIME|0;FBgn0037130|Syn1|UPSTREAM|203],TranscriptAnnot[UTR_3_PRIME(MODIFIER||315||74|CG7370|protein_coding|CODING|FBtr0078436|2|1);UPSTREAM(MODIFIER||203||627|Syn1|protein_coding|CODING|FBtr0078450||1);UPSTREAM(MODIFIER||203||625|Syn1|protein_coding|CODING|FBtr0310451||1);UPSTREAM(MODIFIER||203||627|Syn1|protein_coding|CODING|FBtr033…	This gene is referred to in FlyBase by the symbol Dmel\CG42689 (FBgn0261579).The gene previously had a gene model which is not supported by current evidence. It is a protein_coding_gene from Drosophila melanogaster.. Gene has not been localized to the genome sequence. It has the cytological map location 78F1. Its molecular function is described by: . It is involved in the biological process descr…
FBgn0037133	3L_21763837_SNP	G	A	0.1081	4	33	1.92e-05	0.193884	SiteClass[FBgn0261579|CG42689|INTRON|0;FBgn0037133|CG7370|UTR_3_PRIME|0;FBgn0037130|Syn1|UPSTREAM|203],TranscriptAnnot[UTR_3_PRIME(MODIFIER||315||74|CG7370|protein_coding|CODING|FBtr0078436|2|1);UPSTREAM(MODIFIER||203||627|Syn1|protein_coding|CODING|FBtr0078450||1);UPSTREAM(MODIFIER||203||625|Syn1|protein_coding|CODING|FBtr0310451||1);UPSTREAM(MODIFIER||203||627|Syn1|protein_coding|CODING|FBtr033…	This gene is referred to in FlyBase by the symbol Dmel\CG7370 (FBgn0037133). It is a protein_coding_gene from Drosophila melanogaster. It has one annotated transcript and one polypeptide. Gene sequence location is 3L:21769815..21771321. It has the cytological map location 78F1. Its molecular function is unknown. The biological processes in which it is involved are not known. 13 alleles are report…
FBgn0037130	3L_21763837_SNP	G	A	0.1081	4	33	1.92e-05	0.193884	SiteClass[FBgn0261579|CG42689|INTRON|0;FBgn0037133|CG7370|UTR_3_PRIME|0;FBgn0037130|Syn1|UPSTREAM|203],TranscriptAnnot[UTR_3_PRIME(MODIFIER||315||74|CG7370|protein_coding|CODING|FBtr0078436|2|1);UPSTREAM(MODIFIER||203||627|Syn1|protein_coding|CODING|FBtr0078450||1);UPSTREAM(MODIFIER||203||625|Syn1|protein_coding|CODING|FBtr0310451||1);UPSTREAM(MODIFIER||203||627|Syn1|protein_coding|CODING|FBtr033…	The gene Syntrophin-like 1 is referred to in FlyBase by the symbol Dmel\Syn1 (CG7152, FBgn0037130). It is a protein_coding_gene from Drosophila melanogaster. It has 4 annotated transcripts and 4 polypeptides (3 unique). Gene sequence location is 3L:21745359..21770534. It has the cytological map location 78E6-78F1. Protein features are: PDZ domain; PH domain-like; Pleckstrin homology domain; Syntr…
FBtr0078436	3L_21763837_SNP	G	A	0.1081	4	33	1.92e-05	0.193884	SiteClass[FBgn0261579|CG42689|INTRON|0;FBgn0037133|CG7370|UTR_3_PRIME|0;FBgn0037130|Syn1|UPSTREAM|203],TranscriptAnnot[UTR_3_PRIME(MODIFIER||315||74|CG7370|protein_coding|CODING|FBtr0078436|2|1);UPSTREAM(MODIFIER||203||627|Syn1|protein_coding|CODING|FBtr0078450||1);UPSTREAM(MODIFIER||203||625|Syn1|protein_coding|CODING|FBtr0310451||1);UPSTREAM(MODIFIER||203||627|Syn1|protein_coding|CODING|FBtr033…	-
FBtr0078450	3L_21763837_SNP	G	A	0.1081	4	33	1.92e-05	0.193884	SiteClass[FBgn0261579|CG42689|INTRON|0;FBgn0037133|CG7370|UTR_3_PRIME|0;FBgn0037130|Syn1|UPSTREAM|203],TranscriptAnnot[UTR_3_PRIME(MODIFIER||315||74|CG7370|protein_coding|CODING|FBtr0078436|2|1);UPSTREAM(MODIFIER||203||627|Syn1|protein_coding|CODING|FBtr0078450||1);UPSTREAM(MODIFIER||203||625|Syn1|protein_coding|CODING|FBtr0310451||1);UPSTREAM(MODIFIER||203||627|Syn1|protein_coding|CODING|FBtr033…	-
FBtr0310451	3L_21763837_SNP	G	A	0.1081	4	33	1.92e-05	0.193884	SiteClass[FBgn0261579|CG42689|INTRON|0;FBgn0037133|CG7370|UTR_3_PRIME|0;FBgn0037130|Syn1|UPSTREAM|203],TranscriptAnnot[UTR_3_PRIME(MODIFIER||315||74|CG7370|protein_coding|CODING|FBtr0078436|2|1);UPSTREAM(MODIFIER||203||627|Syn1|protein_coding|CODING|FBtr0078450||1);UPSTREAM(MODIFIER||203||625|Syn1|protein_coding|CODING|FBtr0310451||1);UPSTREAM(MODIFIER||203||627|Syn1|protein_coding|CODING|FBtr033…	-
FBtr0333892	3L_21763837_SNP	G	A	0.1081	4	33	1.92e-05	0.193884	SiteClass[FBgn0261579|CG42689|INTRON|0;FBgn0037133|CG7370|UTR_3_PRIME|0;FBgn0037130|Syn1|UPSTREAM|203],TranscriptAnnot[UTR_3_PRIME(MODIFIER||315||74|CG7370|protein_coding|CODING|FBtr0078436|2|1);UPSTREAM(MODIFIER||203||627|Syn1|protein_coding|CODING|FBtr0078450||1);UPSTREAM(MODIFIER||203||625|Syn1|protein_coding|CODING|FBtr0310451||1);UPSTREAM(MODIFIER||203||627|Syn1|protein_coding|CODING|FBtr033…	-
FBtr0333893	3L_21763837_SNP	G	A	0.1081	4	33	1.92e-05	0.193884	SiteClass[FBgn0261579|CG42689|INTRON|0;FBgn0037133|CG7370|UTR_3_PRIME|0;FBgn0037130|Syn1|UPSTREAM|203],TranscriptAnnot[UTR_3_PRIME(MODIFIER||315||74|CG7370|protein_coding|CODING|FBtr0078436|2|1);UPSTREAM(MODIFIER||203||627|Syn1|protein_coding|CODING|FBtr0078450||1);UPSTREAM(MODIFIER||203||625|Syn1|protein_coding|CODING|FBtr0310451||1);UPSTREAM(MODIFIER||203||627|Syn1|protein_coding|CODING|FBtr033…	-
FBtr0302891	3L_21763837_SNP	G	A	0.1081	4	33	1.92e-05	0.193884	SiteClass[FBgn0261579|CG42689|INTRON|0;FBgn0037133|CG7370|UTR_3_PRIME|0;FBgn0037130|Syn1|UPSTREAM|203],TranscriptAnnot[UTR_3_PRIME(MODIFIER||315||74|CG7370|protein_coding|CODING|FBtr0078436|2|1);UPSTREAM(MODIFIER||203||627|Syn1|protein_coding|CODING|FBtr0078450||1);UPSTREAM(MODIFIER||203||625|Syn1|protein_coding|CODING|FBtr0310451||1);UPSTREAM(MODIFIER||203||627|Syn1|protein_coding|CODING|FBtr033…	-
FBgn0026189	3L_3119893_SNP	T	C	0.1081	4	33	1.92e-05	0.193884	SiteClass[FBgn0026189|prominin-like|SYNONYMOUS_CODING|0],TranscriptAnnot[SYNONYMOUS_CODING(LOW|SILENT|cgA/cgG|R313|993|prominin-like|protein_coding|CODING|FBtr0337056|6|1);SYNONYMOUS_CODING(LOW|SILENT|cgA/cgG|R313|993|prominin-like|protein_coding|CODING|FBtr0306258|7|1);SYNONYMOUS_CODING(LOW|SILENT|cgA/cgG|R313|1013|prominin-like|protein_coding|CODING|FBtr0073118|7|1);SYNONYMOUS_CODING(LOW|SILENT…	The gene prominin-like is referred to in FlyBase by the symbol Dmel\prominin-like (CG7740, FBgn0026189). It is a protein_coding_gene from Drosophila melanogaster. It has 7 annotated transcripts and 7 polypeptides (3 unique). Gene sequence location is 3L:3114450..3127724. It has the cytological map location 63B1-63B3. Protein features are: Prominin. Its molecular function is unknown. It is involve…
FBtr0337056	3L_3119893_SNP	T	C	0.1081	4	33	1.92e-05	0.193884	SiteClass[FBgn0026189|prominin-like|SYNONYMOUS_CODING|0],TranscriptAnnot[SYNONYMOUS_CODING(LOW|SILENT|cgA/cgG|R313|993|prominin-like|protein_coding|CODING|FBtr0337056|6|1);SYNONYMOUS_CODING(LOW|SILENT|cgA/cgG|R313|993|prominin-like|protein_coding|CODING|FBtr0306258|7|1);SYNONYMOUS_CODING(LOW|SILENT|cgA/cgG|R313|1013|prominin-like|protein_coding|CODING|FBtr0073118|7|1);SYNONYMOUS_CODING(LOW|SILENT…	-
FBtr0306258	3L_3119893_SNP	T	C	0.1081	4	33	1.92e-05	0.193884	SiteClass[FBgn0026189|prominin-like|SYNONYMOUS_CODING|0],TranscriptAnnot[SYNONYMOUS_CODING(LOW|SILENT|cgA/cgG|R313|993|prominin-like|protein_coding|CODING|FBtr0337056|6|1);SYNONYMOUS_CODING(LOW|SILENT|cgA/cgG|R313|993|prominin-like|protein_coding|CODING|FBtr0306258|7|1);SYNONYMOUS_CODING(LOW|SILENT|cgA/cgG|R313|1013|prominin-like|protein_coding|CODING|FBtr0073118|7|1);SYNONYMOUS_CODING(LOW|SILENT…	-
FBtr0073118	3L_3119893_SNP	T	C	0.1081	4	33	1.92e-05	0.193884	SiteClass[FBgn0026189|prominin-like|SYNONYMOUS_CODING|0],TranscriptAnnot[SYNONYMOUS_CODING(LOW|SILENT|cgA/cgG|R313|993|prominin-like|protein_coding|CODING|FBtr0337056|6|1);SYNONYMOUS_CODING(LOW|SILENT|cgA/cgG|R313|993|prominin-like|protein_coding|CODING|FBtr0306258|7|1);SYNONYMOUS_CODING(LOW|SILENT|cgA/cgG|R313|1013|prominin-like|protein_coding|CODING|FBtr0073118|7|1);SYNONYMOUS_CODING(LOW|SILENT…	-
FBtr0073119	3L_3119893_SNP	T	C	0.1081	4	33	1.92e-05	0.193884	SiteClass[FBgn0026189|prominin-like|SYNONYMOUS_CODING|0],TranscriptAnnot[SYNONYMOUS_CODING(LOW|SILENT|cgA/cgG|R313|993|prominin-like|protein_coding|CODING|FBtr0337056|6|1);SYNONYMOUS_CODING(LOW|SILENT|cgA/cgG|R313|993|prominin-like|protein_coding|CODING|FBtr0306258|7|1);SYNONYMOUS_CODING(LOW|SILENT|cgA/cgG|R313|1013|prominin-like|protein_coding|CODING|FBtr0073118|7|1);SYNONYMOUS_CODING(LOW|SILENT…	-
FBtr0333895	3L_3119893_SNP	T	C	0.1081	4	33	1.92e-05	0.193884	SiteClass[FBgn0026189|prominin-like|SYNONYMOUS_CODING|0],TranscriptAnnot[SYNONYMOUS_CODING(LOW|SILENT|cgA/cgG|R313|993|prominin-like|protein_coding|CODING|FBtr0337056|6|1);SYNONYMOUS_CODING(LOW|SILENT|cgA/cgG|R313|993|prominin-like|protein_coding|CODING|FBtr0306258|7|1);SYNONYMOUS_CODING(LOW|SILENT|cgA/cgG|R313|1013|prominin-like|protein_coding|CODING|FBtr0073118|7|1);SYNONYMOUS_CODING(LOW|SILENT…	-
FBtr0073120	3L_3119893_SNP	T	C	0.1081	4	33	1.92e-05	0.193884	SiteClass[FBgn0026189|prominin-like|SYNONYMOUS_CODING|0],TranscriptAnnot[SYNONYMOUS_CODING(LOW|SILENT|cgA/cgG|R313|993|prominin-like|protein_coding|CODING|FBtr0337056|6|1);SYNONYMOUS_CODING(LOW|SILENT|cgA/cgG|R313|993|prominin-like|protein_coding|CODING|FBtr0306258|7|1);SYNONYMOUS_CODING(LOW|SILENT|cgA/cgG|R313|1013|prominin-like|protein_coding|CODING|FBtr0073118|7|1);SYNONYMOUS_CODING(LOW|SILENT…	-
FBtr0337055	3L_3119893_SNP	T	C	0.1081	4	33	1.92e-05	0.193884	SiteClass[FBgn0026189|prominin-like|SYNONYMOUS_CODING|0],TranscriptAnnot[SYNONYMOUS_CODING(LOW|SILENT|cgA/cgG|R313|993|prominin-like|protein_coding|CODING|FBtr0337056|6|1);SYNONYMOUS_CODING(LOW|SILENT|cgA/cgG|R313|993|prominin-like|protein_coding|CODING|FBtr0306258|7|1);SYNONYMOUS_CODING(LOW|SILENT|cgA/cgG|R313|1013|prominin-like|protein_coding|CODING|FBtr0073118|7|1);SYNONYMOUS_CODING(LOW|SILENT…	-
FBgn0261579	3L_21762122_SNP	A	T	0.1081	4	33	1.92e-05	0.193884	SiteClass[FBgn0261579|CG42689|INTRON|0;FBgn0037130|Syn1|INTRON|0;FBgn0037133|CG7370|UPSTREAM|793],TranscriptAnnot[UPSTREAM(MODIFIER||793||74|CG7370|protein_coding|CODING|FBtr0078436||1);INTRON(MODIFIER||||625|Syn1|protein_coding|CODING|FBtr0310451|1|1);INTRON(MODIFIER||||627|Syn1|protein_coding|CODING|FBtr0333892|1|1);INTRON(MODIFIER||||627|Syn1|protein_coding|CODING|FBtr0078450|1|1);INTRON(MODIF…	This gene is referred to in FlyBase by the symbol Dmel\CG42689 (FBgn0261579).The gene previously had a gene model which is not supported by current evidence. It is a protein_coding_gene from Drosophila melanogaster.. Gene has not been localized to the genome sequence. It has the cytological map location 78F1. Its molecular function is described by: . It is involved in the biological process descr…
FBgn0037130	3L_21762122_SNP	A	T	0.1081	4	33	1.92e-05	0.193884	SiteClass[FBgn0261579|CG42689|INTRON|0;FBgn0037130|Syn1|INTRON|0;FBgn0037133|CG7370|UPSTREAM|793],TranscriptAnnot[UPSTREAM(MODIFIER||793||74|CG7370|protein_coding|CODING|FBtr0078436||1);INTRON(MODIFIER||||625|Syn1|protein_coding|CODING|FBtr0310451|1|1);INTRON(MODIFIER||||627|Syn1|protein_coding|CODING|FBtr0333892|1|1);INTRON(MODIFIER||||627|Syn1|protein_coding|CODING|FBtr0078450|1|1);INTRON(MODIF…	The gene Syntrophin-like 1 is referred to in FlyBase by the symbol Dmel\Syn1 (CG7152, FBgn0037130). It is a protein_coding_gene from Drosophila melanogaster. It has 4 annotated transcripts and 4 polypeptides (3 unique). Gene sequence location is 3L:21745359..21770534. It has the cytological map location 78E6-78F1. Protein features are: PDZ domain; PH domain-like; Pleckstrin homology domain; Syntr…
FBgn0037133	3L_21762122_SNP	A	T	0.1081	4	33	1.92e-05	0.193884	SiteClass[FBgn0261579|CG42689|INTRON|0;FBgn0037130|Syn1|INTRON|0;FBgn0037133|CG7370|UPSTREAM|793],TranscriptAnnot[UPSTREAM(MODIFIER||793||74|CG7370|protein_coding|CODING|FBtr0078436||1);INTRON(MODIFIER||||625|Syn1|protein_coding|CODING|FBtr0310451|1|1);INTRON(MODIFIER||||627|Syn1|protein_coding|CODING|FBtr0333892|1|1);INTRON(MODIFIER||||627|Syn1|protein_coding|CODING|FBtr0078450|1|1);INTRON(MODIF…	This gene is referred to in FlyBase by the symbol Dmel\CG7370 (FBgn0037133). It is a protein_coding_gene from Drosophila melanogaster. It has one annotated transcript and one polypeptide. Gene sequence location is 3L:21769815..21771321. It has the cytological map location 78F1. Its molecular function is unknown. The biological processes in which it is involved are not known. 13 alleles are report…
FBtr0078436	3L_21762122_SNP	A	T	0.1081	4	33	1.92e-05	0.193884	SiteClass[FBgn0261579|CG42689|INTRON|0;FBgn0037130|Syn1|INTRON|0;FBgn0037133|CG7370|UPSTREAM|793],TranscriptAnnot[UPSTREAM(MODIFIER||793||74|CG7370|protein_coding|CODING|FBtr0078436||1);INTRON(MODIFIER||||625|Syn1|protein_coding|CODING|FBtr0310451|1|1);INTRON(MODIFIER||||627|Syn1|protein_coding|CODING|FBtr0333892|1|1);INTRON(MODIFIER||||627|Syn1|protein_coding|CODING|FBtr0078450|1|1);INTRON(MODIF…	-
FBtr0310451	3L_21762122_SNP	A	T	0.1081	4	33	1.92e-05	0.193884	SiteClass[FBgn0261579|CG42689|INTRON|0;FBgn0037130|Syn1|INTRON|0;FBgn0037133|CG7370|UPSTREAM|793],TranscriptAnnot[UPSTREAM(MODIFIER||793||74|CG7370|protein_coding|CODING|FBtr0078436||1);INTRON(MODIFIER||||625|Syn1|protein_coding|CODING|FBtr0310451|1|1);INTRON(MODIFIER||||627|Syn1|protein_coding|CODING|FBtr0333892|1|1);INTRON(MODIFIER||||627|Syn1|protein_coding|CODING|FBtr0078450|1|1);INTRON(MODIF…	-
FBtr0333892	3L_21762122_SNP	A	T	0.1081	4	33	1.92e-05	0.193884	SiteClass[FBgn0261579|CG42689|INTRON|0;FBgn0037130|Syn1|INTRON|0;FBgn0037133|CG7370|UPSTREAM|793],TranscriptAnnot[UPSTREAM(MODIFIER||793||74|CG7370|protein_coding|CODING|FBtr0078436||1);INTRON(MODIFIER||||625|Syn1|protein_coding|CODING|FBtr0310451|1|1);INTRON(MODIFIER||||627|Syn1|protein_coding|CODING|FBtr0333892|1|1);INTRON(MODIFIER||||627|Syn1|protein_coding|CODING|FBtr0078450|1|1);INTRON(MODIF…	-
FBtr0078450	3L_21762122_SNP	A	T	0.1081	4	33	1.92e-05	0.193884	SiteClass[FBgn0261579|CG42689|INTRON|0;FBgn0037130|Syn1|INTRON|0;FBgn0037133|CG7370|UPSTREAM|793],TranscriptAnnot[UPSTREAM(MODIFIER||793||74|CG7370|protein_coding|CODING|FBtr0078436||1);INTRON(MODIFIER||||625|Syn1|protein_coding|CODING|FBtr0310451|1|1);INTRON(MODIFIER||||627|Syn1|protein_coding|CODING|FBtr0333892|1|1);INTRON(MODIFIER||||627|Syn1|protein_coding|CODING|FBtr0078450|1|1);INTRON(MODIF…	-
FBtr0333893	3L_21762122_SNP	A	T	0.1081	4	33	1.92e-05	0.193884	SiteClass[FBgn0261579|CG42689|INTRON|0;FBgn0037130|Syn1|INTRON|0;FBgn0037133|CG7370|UPSTREAM|793],TranscriptAnnot[UPSTREAM(MODIFIER||793||74|CG7370|protein_coding|CODING|FBtr0078436||1);INTRON(MODIFIER||||625|Syn1|protein_coding|CODING|FBtr0310451|1|1);INTRON(MODIFIER||||627|Syn1|protein_coding|CODING|FBtr0333892|1|1);INTRON(MODIFIER||||627|Syn1|protein_coding|CODING|FBtr0078450|1|1);INTRON(MODIF…	-
FBtr0302891	3L_21762122_SNP	A	T	0.1081	4	33	1.92e-05	0.193884	SiteClass[FBgn0261579|CG42689|INTRON|0;FBgn0037130|Syn1|INTRON|0;FBgn0037133|CG7370|UPSTREAM|793],TranscriptAnnot[UPSTREAM(MODIFIER||793||74|CG7370|protein_coding|CODING|FBtr0078436||1);INTRON(MODIFIER||||625|Syn1|protein_coding|CODING|FBtr0310451|1|1);INTRON(MODIFIER||||627|Syn1|protein_coding|CODING|FBtr0333892|1|1);INTRON(MODIFIER||||627|Syn1|protein_coding|CODING|FBtr0078450|1|1);INTRON(MODIF…	-
FBgn0034938	2R_19840166_SNP	A	C	0.1176	4	30	1.99e-05	0.198764	SiteClass[FBgn0034938|CG3803|SYNONYMOUS_CODING|0;FBgn0034936|CG2970|DOWNSTREAM|184;FBgn0034937|fzr2|DOWNSTREAM|547],TranscriptAnnot[SYNONYMOUS_CODING(LOW|SILENT|gtG/gtT|V359|393|CG3803|protein_coding|CODING|FBtr0072208|4|1);DOWNSTREAM(MODIFIER||547||451|fzr2|protein_coding|CODING|FBtr0072146||1);DOWNSTREAM(MODIFIER||184||366|CG2970|protein_coding|CODING|FBtr0072145||1);DOWNSTREAM(MODIFIER||184||3…	This gene is referred to in FlyBase by the symbol Dmel\CG3803 (FBgn0034938). It is a protein_coding_gene from Drosophila melanogaster. It has one annotated transcript and one polypeptide. Gene sequence location is 2R:23952513..23954048. It has the cytological map location 60A13. Protein features are: COX15/CtaA family; Peptidase S1, PA clan. Its molecular function is described by: oxidoreductase …
FBgn0034936	2R_19840166_SNP	A	C	0.1176	4	30	1.99e-05	0.198764	SiteClass[FBgn0034938|CG3803|SYNONYMOUS_CODING|0;FBgn0034936|CG2970|DOWNSTREAM|184;FBgn0034937|fzr2|DOWNSTREAM|547],TranscriptAnnot[SYNONYMOUS_CODING(LOW|SILENT|gtG/gtT|V359|393|CG3803|protein_coding|CODING|FBtr0072208|4|1);DOWNSTREAM(MODIFIER||547||451|fzr2|protein_coding|CODING|FBtr0072146||1);DOWNSTREAM(MODIFIER||184||366|CG2970|protein_coding|CODING|FBtr0072145||1);DOWNSTREAM(MODIFIER||184||3…	This gene is referred to in FlyBase by the symbol Dmel\CG2970 (FBgn0034936). It is a protein_coding_gene from Drosophila melanogaster. It has 2 annotated transcripts and 2 polypeptides (1 unique). Gene sequence location is 2R:23949201..23952459. It has the cytological map location 60A13. Protein features are: Band 7 domain; Band 7, C-terminal extension; Stomatin family. Its molecular function is …
FBgn0034937	2R_19840166_SNP	A	C	0.1176	4	30	1.99e-05	0.198764	SiteClass[FBgn0034938|CG3803|SYNONYMOUS_CODING|0;FBgn0034936|CG2970|DOWNSTREAM|184;FBgn0034937|fzr2|DOWNSTREAM|547],TranscriptAnnot[SYNONYMOUS_CODING(LOW|SILENT|gtG/gtT|V359|393|CG3803|protein_coding|CODING|FBtr0072208|4|1);DOWNSTREAM(MODIFIER||547||451|fzr2|protein_coding|CODING|FBtr0072146||1);DOWNSTREAM(MODIFIER||184||366|CG2970|protein_coding|CODING|FBtr0072145||1);DOWNSTREAM(MODIFIER||184||3…	The gene fizzy-related 2 is referred to in FlyBase by the symbol Dmel\fzr2 (CG16783, FBgn0034937). It is a protein_coding_gene from Drosophila melanogaster. It has one annotated transcript and one polypeptide. Gene sequence location is 2R:23950647..23952096. It has the cytological map location 60A13. Protein features are: WD40 repeat; WD40 repeat, conserved site; WD40-repeat-containing domain; WD…
FBtr0072208	2R_19840166_SNP	A	C	0.1176	4	30	1.99e-05	0.198764	SiteClass[FBgn0034938|CG3803|SYNONYMOUS_CODING|0;FBgn0034936|CG2970|DOWNSTREAM|184;FBgn0034937|fzr2|DOWNSTREAM|547],TranscriptAnnot[SYNONYMOUS_CODING(LOW|SILENT|gtG/gtT|V359|393|CG3803|protein_coding|CODING|FBtr0072208|4|1);DOWNSTREAM(MODIFIER||547||451|fzr2|protein_coding|CODING|FBtr0072146||1);DOWNSTREAM(MODIFIER||184||366|CG2970|protein_coding|CODING|FBtr0072145||1);DOWNSTREAM(MODIFIER||184||3…	-
FBtr0072146	2R_19840166_SNP	A	C	0.1176	4	30	1.99e-05	0.198764	SiteClass[FBgn0034938|CG3803|SYNONYMOUS_CODING|0;FBgn0034936|CG2970|DOWNSTREAM|184;FBgn0034937|fzr2|DOWNSTREAM|547],TranscriptAnnot[SYNONYMOUS_CODING(LOW|SILENT|gtG/gtT|V359|393|CG3803|protein_coding|CODING|FBtr0072208|4|1);DOWNSTREAM(MODIFIER||547||451|fzr2|protein_coding|CODING|FBtr0072146||1);DOWNSTREAM(MODIFIER||184||366|CG2970|protein_coding|CODING|FBtr0072145||1);DOWNSTREAM(MODIFIER||184||3…	-
FBtr0072145	2R_19840166_SNP	A	C	0.1176	4	30	1.99e-05	0.198764	SiteClass[FBgn0034938|CG3803|SYNONYMOUS_CODING|0;FBgn0034936|CG2970|DOWNSTREAM|184;FBgn0034937|fzr2|DOWNSTREAM|547],TranscriptAnnot[SYNONYMOUS_CODING(LOW|SILENT|gtG/gtT|V359|393|CG3803|protein_coding|CODING|FBtr0072208|4|1);DOWNSTREAM(MODIFIER||547||451|fzr2|protein_coding|CODING|FBtr0072146||1);DOWNSTREAM(MODIFIER||184||366|CG2970|protein_coding|CODING|FBtr0072145||1);DOWNSTREAM(MODIFIER||184||3…	-
FBtr0331980	2R_19840166_SNP	A	C	0.1176	4	30	1.99e-05	0.198764	SiteClass[FBgn0034938|CG3803|SYNONYMOUS_CODING|0;FBgn0034936|CG2970|DOWNSTREAM|184;FBgn0034937|fzr2|DOWNSTREAM|547],TranscriptAnnot[SYNONYMOUS_CODING(LOW|SILENT|gtG/gtT|V359|393|CG3803|protein_coding|CODING|FBtr0072208|4|1);DOWNSTREAM(MODIFIER||547||451|fzr2|protein_coding|CODING|FBtr0072146||1);DOWNSTREAM(MODIFIER||184||366|CG2970|protein_coding|CODING|FBtr0072145||1);DOWNSTREAM(MODIFIER||184||3…	-
FBgn0261611	2R_8181352_DEL	A	AC	0.1111	4	32	2.2e-05	0.203468	SiteClass[FBgn0261611|CG42700|INTRON|0],TranscriptAnnot[INTRON(MODIFIER||||509|CG42700|protein_coding|CODING|FBtr0345482|1|1);INTRON(MODIFIER||||370|CG42700|protein_coding|CODING|FBtr0302922|1|1);INTRON(MODIFIER||||370|CG42700|protein_coding|CODING|FBtr0345481|1|1);INTRON(MODIFIER||||370|CG42700|protein_coding|CODING|FBtr0345483|1|1);INTRON(MODIFIER||||361|CG42700|protein_coding|CODING|FBtr033292…	This gene is referred to in FlyBase by the symbol Dmel\CG42700 (FBgn0261611). It is a protein_coding_gene from Drosophila melanogaster. It has 8 annotated transcripts and 8 polypeptides (6 unique). Gene sequence location is 2R:12279771..12300795. It has the cytological map location 48F6. Its molecular function is unknown. The biological processes in which it is involved are not known. 6 alleles a…
FBtr0345482	2R_8181352_DEL	A	AC	0.1111	4	32	2.2e-05	0.203468	SiteClass[FBgn0261611|CG42700|INTRON|0],TranscriptAnnot[INTRON(MODIFIER||||509|CG42700|protein_coding|CODING|FBtr0345482|1|1);INTRON(MODIFIER||||370|CG42700|protein_coding|CODING|FBtr0302922|1|1);INTRON(MODIFIER||||370|CG42700|protein_coding|CODING|FBtr0345481|1|1);INTRON(MODIFIER||||370|CG42700|protein_coding|CODING|FBtr0345483|1|1);INTRON(MODIFIER||||361|CG42700|protein_coding|CODING|FBtr033292…	-
FBtr0302922	2R_8181352_DEL	A	AC	0.1111	4	32	2.2e-05	0.203468	SiteClass[FBgn0261611|CG42700|INTRON|0],TranscriptAnnot[INTRON(MODIFIER||||509|CG42700|protein_coding|CODING|FBtr0345482|1|1);INTRON(MODIFIER||||370|CG42700|protein_coding|CODING|FBtr0302922|1|1);INTRON(MODIFIER||||370|CG42700|protein_coding|CODING|FBtr0345481|1|1);INTRON(MODIFIER||||370|CG42700|protein_coding|CODING|FBtr0345483|1|1);INTRON(MODIFIER||||361|CG42700|protein_coding|CODING|FBtr033292…	-
FBtr0345481	2R_8181352_DEL	A	AC	0.1111	4	32	2.2e-05	0.203468	SiteClass[FBgn0261611|CG42700|INTRON|0],TranscriptAnnot[INTRON(MODIFIER||||509|CG42700|protein_coding|CODING|FBtr0345482|1|1);INTRON(MODIFIER||||370|CG42700|protein_coding|CODING|FBtr0302922|1|1);INTRON(MODIFIER||||370|CG42700|protein_coding|CODING|FBtr0345481|1|1);INTRON(MODIFIER||||370|CG42700|protein_coding|CODING|FBtr0345483|1|1);INTRON(MODIFIER||||361|CG42700|protein_coding|CODING|FBtr033292…	-
FBtr0345483	2R_8181352_DEL	A	AC	0.1111	4	32	2.2e-05	0.203468	SiteClass[FBgn0261611|CG42700|INTRON|0],TranscriptAnnot[INTRON(MODIFIER||||509|CG42700|protein_coding|CODING|FBtr0345482|1|1);INTRON(MODIFIER||||370|CG42700|protein_coding|CODING|FBtr0302922|1|1);INTRON(MODIFIER||||370|CG42700|protein_coding|CODING|FBtr0345481|1|1);INTRON(MODIFIER||||370|CG42700|protein_coding|CODING|FBtr0345483|1|1);INTRON(MODIFIER||||361|CG42700|protein_coding|CODING|FBtr033292…	-
FBtr0332922	2R_8181352_DEL	A	AC	0.1111	4	32	2.2e-05	0.203468	SiteClass[FBgn0261611|CG42700|INTRON|0],TranscriptAnnot[INTRON(MODIFIER||||509|CG42700|protein_coding|CODING|FBtr0345482|1|1);INTRON(MODIFIER||||370|CG42700|protein_coding|CODING|FBtr0302922|1|1);INTRON(MODIFIER||||370|CG42700|protein_coding|CODING|FBtr0345481|1|1);INTRON(MODIFIER||||370|CG42700|protein_coding|CODING|FBtr0345483|1|1);INTRON(MODIFIER||||361|CG42700|protein_coding|CODING|FBtr033292…	-
FBtr0302923	2R_8181352_DEL	A	AC	0.1111	4	32	2.2e-05	0.203468	SiteClass[FBgn0261611|CG42700|INTRON|0],TranscriptAnnot[INTRON(MODIFIER||||509|CG42700|protein_coding|CODING|FBtr0345482|1|1);INTRON(MODIFIER||||370|CG42700|protein_coding|CODING|FBtr0302922|1|1);INTRON(MODIFIER||||370|CG42700|protein_coding|CODING|FBtr0345481|1|1);INTRON(MODIFIER||||370|CG42700|protein_coding|CODING|FBtr0345483|1|1);INTRON(MODIFIER||||361|CG42700|protein_coding|CODING|FBtr033292…	-
FBtr0332924	2R_8181352_DEL	A	AC	0.1111	4	32	2.2e-05	0.203468	SiteClass[FBgn0261611|CG42700|INTRON|0],TranscriptAnnot[INTRON(MODIFIER||||509|CG42700|protein_coding|CODING|FBtr0345482|1|1);INTRON(MODIFIER||||370|CG42700|protein_coding|CODING|FBtr0302922|1|1);INTRON(MODIFIER||||370|CG42700|protein_coding|CODING|FBtr0345481|1|1);INTRON(MODIFIER||||370|CG42700|protein_coding|CODING|FBtr0345483|1|1);INTRON(MODIFIER||||361|CG42700|protein_coding|CODING|FBtr033292…	-
FBtr0332923	2R_8181352_DEL	A	AC	0.1111	4	32	2.2e-05	0.203468	SiteClass[FBgn0261611|CG42700|INTRON|0],TranscriptAnnot[INTRON(MODIFIER||||509|CG42700|protein_coding|CODING|FBtr0345482|1|1);INTRON(MODIFIER||||370|CG42700|protein_coding|CODING|FBtr0302922|1|1);INTRON(MODIFIER||||370|CG42700|protein_coding|CODING|FBtr0345481|1|1);INTRON(MODIFIER||||370|CG42700|protein_coding|CODING|FBtr0345483|1|1);INTRON(MODIFIER||||361|CG42700|protein_coding|CODING|FBtr033292…	-
FBgn0261611	2R_8178527_SNP	T	C	0.1111	4	32	2.2e-05	0.203468	SiteClass[FBgn0261611|CG42700|INTRON|0],TranscriptAnnot[INTRON(MODIFIER||||509|CG42700|protein_coding|CODING|FBtr0345482|1|1);INTRON(MODIFIER||||370|CG42700|protein_coding|CODING|FBtr0302922|1|1);INTRON(MODIFIER||||370|CG42700|protein_coding|CODING|FBtr0345481|1|1);INTRON(MODIFIER||||370|CG42700|protein_coding|CODING|FBtr0345483|1|1);INTRON(MODIFIER||||361|CG42700|protein_coding|CODING|FBtr033292…	This gene is referred to in FlyBase by the symbol Dmel\CG42700 (FBgn0261611). It is a protein_coding_gene from Drosophila melanogaster. It has 8 annotated transcripts and 8 polypeptides (6 unique). Gene sequence location is 2R:12279771..12300795. It has the cytological map location 48F6. Its molecular function is unknown. The biological processes in which it is involved are not known. 6 alleles a…
FBtr0345482	2R_8178527_SNP	T	C	0.1111	4	32	2.2e-05	0.203468	SiteClass[FBgn0261611|CG42700|INTRON|0],TranscriptAnnot[INTRON(MODIFIER||||509|CG42700|protein_coding|CODING|FBtr0345482|1|1);INTRON(MODIFIER||||370|CG42700|protein_coding|CODING|FBtr0302922|1|1);INTRON(MODIFIER||||370|CG42700|protein_coding|CODING|FBtr0345481|1|1);INTRON(MODIFIER||||370|CG42700|protein_coding|CODING|FBtr0345483|1|1);INTRON(MODIFIER||||361|CG42700|protein_coding|CODING|FBtr033292…	-
FBtr0302922	2R_8178527_SNP	T	C	0.1111	4	32	2.2e-05	0.203468	SiteClass[FBgn0261611|CG42700|INTRON|0],TranscriptAnnot[INTRON(MODIFIER||||509|CG42700|protein_coding|CODING|FBtr0345482|1|1);INTRON(MODIFIER||||370|CG42700|protein_coding|CODING|FBtr0302922|1|1);INTRON(MODIFIER||||370|CG42700|protein_coding|CODING|FBtr0345481|1|1);INTRON(MODIFIER||||370|CG42700|protein_coding|CODING|FBtr0345483|1|1);INTRON(MODIFIER||||361|CG42700|protein_coding|CODING|FBtr033292…	-
FBtr0345481	2R_8178527_SNP	T	C	0.1111	4	32	2.2e-05	0.203468	SiteClass[FBgn0261611|CG42700|INTRON|0],TranscriptAnnot[INTRON(MODIFIER||||509|CG42700|protein_coding|CODING|FBtr0345482|1|1);INTRON(MODIFIER||||370|CG42700|protein_coding|CODING|FBtr0302922|1|1);INTRON(MODIFIER||||370|CG42700|protein_coding|CODING|FBtr0345481|1|1);INTRON(MODIFIER||||370|CG42700|protein_coding|CODING|FBtr0345483|1|1);INTRON(MODIFIER||||361|CG42700|protein_coding|CODING|FBtr033292…	-
FBtr0345483	2R_8178527_SNP	T	C	0.1111	4	32	2.2e-05	0.203468	SiteClass[FBgn0261611|CG42700|INTRON|0],TranscriptAnnot[INTRON(MODIFIER||||509|CG42700|protein_coding|CODING|FBtr0345482|1|1);INTRON(MODIFIER||||370|CG42700|protein_coding|CODING|FBtr0302922|1|1);INTRON(MODIFIER||||370|CG42700|protein_coding|CODING|FBtr0345481|1|1);INTRON(MODIFIER||||370|CG42700|protein_coding|CODING|FBtr0345483|1|1);INTRON(MODIFIER||||361|CG42700|protein_coding|CODING|FBtr033292…	-
FBtr0332922	2R_8178527_SNP	T	C	0.1111	4	32	2.2e-05	0.203468	SiteClass[FBgn0261611|CG42700|INTRON|0],TranscriptAnnot[INTRON(MODIFIER||||509|CG42700|protein_coding|CODING|FBtr0345482|1|1);INTRON(MODIFIER||||370|CG42700|protein_coding|CODING|FBtr0302922|1|1);INTRON(MODIFIER||||370|CG42700|protein_coding|CODING|FBtr0345481|1|1);INTRON(MODIFIER||||370|CG42700|protein_coding|CODING|FBtr0345483|1|1);INTRON(MODIFIER||||361|CG42700|protein_coding|CODING|FBtr033292…	-
FBtr0302923	2R_8178527_SNP	T	C	0.1111	4	32	2.2e-05	0.203468	SiteClass[FBgn0261611|CG42700|INTRON|0],TranscriptAnnot[INTRON(MODIFIER||||509|CG42700|protein_coding|CODING|FBtr0345482|1|1);INTRON(MODIFIER||||370|CG42700|protein_coding|CODING|FBtr0302922|1|1);INTRON(MODIFIER||||370|CG42700|protein_coding|CODING|FBtr0345481|1|1);INTRON(MODIFIER||||370|CG42700|protein_coding|CODING|FBtr0345483|1|1);INTRON(MODIFIER||||361|CG42700|protein_coding|CODING|FBtr033292…	-
FBtr0332923	2R_8178527_SNP	T	C	0.1111	4	32	2.2e-05	0.203468	SiteClass[FBgn0261611|CG42700|INTRON|0],TranscriptAnnot[INTRON(MODIFIER||||509|CG42700|protein_coding|CODING|FBtr0345482|1|1);INTRON(MODIFIER||||370|CG42700|protein_coding|CODING|FBtr0302922|1|1);INTRON(MODIFIER||||370|CG42700|protein_coding|CODING|FBtr0345481|1|1);INTRON(MODIFIER||||370|CG42700|protein_coding|CODING|FBtr0345483|1|1);INTRON(MODIFIER||||361|CG42700|protein_coding|CODING|FBtr033292…	-
FBtr0332924	2R_8178527_SNP	T	C	0.1111	4	32	2.2e-05	0.203468	SiteClass[FBgn0261611|CG42700|INTRON|0],TranscriptAnnot[INTRON(MODIFIER||||509|CG42700|protein_coding|CODING|FBtr0345482|1|1);INTRON(MODIFIER||||370|CG42700|protein_coding|CODING|FBtr0302922|1|1);INTRON(MODIFIER||||370|CG42700|protein_coding|CODING|FBtr0345481|1|1);INTRON(MODIFIER||||370|CG42700|protein_coding|CODING|FBtr0345483|1|1);INTRON(MODIFIER||||361|CG42700|protein_coding|CODING|FBtr033292…	-
FBgn0261611	2R_8176555_SNP	C	A	0.1111	4	32	2.2e-05	0.203468	SiteClass[FBgn0261611|CG42700|INTRON|0],TranscriptAnnot[INTRON(MODIFIER||||509|CG42700|protein_coding|CODING|FBtr0345482|1|1);INTRON(MODIFIER||||370|CG42700|protein_coding|CODING|FBtr0302922|1|1);INTRON(MODIFIER||||370|CG42700|protein_coding|CODING|FBtr0345481|1|1);INTRON(MODIFIER||||370|CG42700|protein_coding|CODING|FBtr0345483|1|1);INTRON(MODIFIER||||361|CG42700|protein_coding|CODING|FBtr033292…	This gene is referred to in FlyBase by the symbol Dmel\CG42700 (FBgn0261611). It is a protein_coding_gene from Drosophila melanogaster. It has 8 annotated transcripts and 8 polypeptides (6 unique). Gene sequence location is 2R:12279771..12300795. It has the cytological map location 48F6. Its molecular function is unknown. The biological processes in which it is involved are not known. 6 alleles a…
FBtr0345482	2R_8176555_SNP	C	A	0.1111	4	32	2.2e-05	0.203468	SiteClass[FBgn0261611|CG42700|INTRON|0],TranscriptAnnot[INTRON(MODIFIER||||509|CG42700|protein_coding|CODING|FBtr0345482|1|1);INTRON(MODIFIER||||370|CG42700|protein_coding|CODING|FBtr0302922|1|1);INTRON(MODIFIER||||370|CG42700|protein_coding|CODING|FBtr0345481|1|1);INTRON(MODIFIER||||370|CG42700|protein_coding|CODING|FBtr0345483|1|1);INTRON(MODIFIER||||361|CG42700|protein_coding|CODING|FBtr033292…	-
FBtr0302922	2R_8176555_SNP	C	A	0.1111	4	32	2.2e-05	0.203468	SiteClass[FBgn0261611|CG42700|INTRON|0],TranscriptAnnot[INTRON(MODIFIER||||509|CG42700|protein_coding|CODING|FBtr0345482|1|1);INTRON(MODIFIER||||370|CG42700|protein_coding|CODING|FBtr0302922|1|1);INTRON(MODIFIER||||370|CG42700|protein_coding|CODING|FBtr0345481|1|1);INTRON(MODIFIER||||370|CG42700|protein_coding|CODING|FBtr0345483|1|1);INTRON(MODIFIER||||361|CG42700|protein_coding|CODING|FBtr033292…	-
FBtr0345481	2R_8176555_SNP	C	A	0.1111	4	32	2.2e-05	0.203468	SiteClass[FBgn0261611|CG42700|INTRON|0],TranscriptAnnot[INTRON(MODIFIER||||509|CG42700|protein_coding|CODING|FBtr0345482|1|1);INTRON(MODIFIER||||370|CG42700|protein_coding|CODING|FBtr0302922|1|1);INTRON(MODIFIER||||370|CG42700|protein_coding|CODING|FBtr0345481|1|1);INTRON(MODIFIER||||370|CG42700|protein_coding|CODING|FBtr0345483|1|1);INTRON(MODIFIER||||361|CG42700|protein_coding|CODING|FBtr033292…	-
FBtr0345483	2R_8176555_SNP	C	A	0.1111	4	32	2.2e-05	0.203468	SiteClass[FBgn0261611|CG42700|INTRON|0],TranscriptAnnot[INTRON(MODIFIER||||509|CG42700|protein_coding|CODING|FBtr0345482|1|1);INTRON(MODIFIER||||370|CG42700|protein_coding|CODING|FBtr0302922|1|1);INTRON(MODIFIER||||370|CG42700|protein_coding|CODING|FBtr0345481|1|1);INTRON(MODIFIER||||370|CG42700|protein_coding|CODING|FBtr0345483|1|1);INTRON(MODIFIER||||361|CG42700|protein_coding|CODING|FBtr033292…	-
FBtr0332922	2R_8176555_SNP	C	A	0.1111	4	32	2.2e-05	0.203468	SiteClass[FBgn0261611|CG42700|INTRON|0],TranscriptAnnot[INTRON(MODIFIER||||509|CG42700|protein_coding|CODING|FBtr0345482|1|1);INTRON(MODIFIER||||370|CG42700|protein_coding|CODING|FBtr0302922|1|1);INTRON(MODIFIER||||370|CG42700|protein_coding|CODING|FBtr0345481|1|1);INTRON(MODIFIER||||370|CG42700|protein_coding|CODING|FBtr0345483|1|1);INTRON(MODIFIER||||361|CG42700|protein_coding|CODING|FBtr033292…	-
FBgn0051145	3R_19454784_SNP	A	T	0.1111	4	32	2.13e-05	0.203468	SiteClass[FBgn0051145|CG31145|INTRON|0],TranscriptAnnot[INTRON(MODIFIER||||980|CG31145|protein_coding|CODING|FBtr0290056|7|1);INTRON(MODIFIER||||915|CG31145|protein_coding|CODING|FBtr0290057|7|1);INTRON(MODIFIER||||528|CG31145|protein_coding|CODING|FBtr0084479|4|1);INTRON(MODIFIER||||528|CG31145|protein_coding|CODING|FBtr0336459|4|1);INTRON(MODIFIER||||528|CG31145|protein_coding|CODING|FBtr008448…	This gene is referred to in FlyBase by the symbol Dmel\CG31145 (FBgn0051145). It is a protein_coding_gene from Drosophila melanogaster. It has 5 annotated transcripts and 5 polypeptides (3 unique). Gene sequence location is 3R:23605751..23669659. It has the cytological map location 95A4-95A7. Protein features are: FAM20; FAM20, C-terminal. Its molecular function is described by: protein kinase ac…
FBtr0290056	3R_19454784_SNP	A	T	0.1111	4	32	2.13e-05	0.203468	SiteClass[FBgn0051145|CG31145|INTRON|0],TranscriptAnnot[INTRON(MODIFIER||||980|CG31145|protein_coding|CODING|FBtr0290056|7|1);INTRON(MODIFIER||||915|CG31145|protein_coding|CODING|FBtr0290057|7|1);INTRON(MODIFIER||||528|CG31145|protein_coding|CODING|FBtr0084479|4|1);INTRON(MODIFIER||||528|CG31145|protein_coding|CODING|FBtr0336459|4|1);INTRON(MODIFIER||||528|CG31145|protein_coding|CODING|FBtr008448…	-
FBtr0290057	3R_19454784_SNP	A	T	0.1111	4	32	2.13e-05	0.203468	SiteClass[FBgn0051145|CG31145|INTRON|0],TranscriptAnnot[INTRON(MODIFIER||||980|CG31145|protein_coding|CODING|FBtr0290056|7|1);INTRON(MODIFIER||||915|CG31145|protein_coding|CODING|FBtr0290057|7|1);INTRON(MODIFIER||||528|CG31145|protein_coding|CODING|FBtr0084479|4|1);INTRON(MODIFIER||||528|CG31145|protein_coding|CODING|FBtr0336459|4|1);INTRON(MODIFIER||||528|CG31145|protein_coding|CODING|FBtr008448…	-
FBtr0084479	3R_19454784_SNP	A	T	0.1111	4	32	2.13e-05	0.203468	SiteClass[FBgn0051145|CG31145|INTRON|0],TranscriptAnnot[INTRON(MODIFIER||||980|CG31145|protein_coding|CODING|FBtr0290056|7|1);INTRON(MODIFIER||||915|CG31145|protein_coding|CODING|FBtr0290057|7|1);INTRON(MODIFIER||||528|CG31145|protein_coding|CODING|FBtr0084479|4|1);INTRON(MODIFIER||||528|CG31145|protein_coding|CODING|FBtr0336459|4|1);INTRON(MODIFIER||||528|CG31145|protein_coding|CODING|FBtr008448…	-
FBtr0336459	3R_19454784_SNP	A	T	0.1111	4	32	2.13e-05	0.203468	SiteClass[FBgn0051145|CG31145|INTRON|0],TranscriptAnnot[INTRON(MODIFIER||||980|CG31145|protein_coding|CODING|FBtr0290056|7|1);INTRON(MODIFIER||||915|CG31145|protein_coding|CODING|FBtr0290057|7|1);INTRON(MODIFIER||||528|CG31145|protein_coding|CODING|FBtr0084479|4|1);INTRON(MODIFIER||||528|CG31145|protein_coding|CODING|FBtr0336459|4|1);INTRON(MODIFIER||||528|CG31145|protein_coding|CODING|FBtr008448…	-
FBtr0084480	3R_19454784_SNP	A	T	0.1111	4	32	2.13e-05	0.203468	SiteClass[FBgn0051145|CG31145|INTRON|0],TranscriptAnnot[INTRON(MODIFIER||||980|CG31145|protein_coding|CODING|FBtr0290056|7|1);INTRON(MODIFIER||||915|CG31145|protein_coding|CODING|FBtr0290057|7|1);INTRON(MODIFIER||||528|CG31145|protein_coding|CODING|FBtr0084479|4|1);INTRON(MODIFIER||||528|CG31145|protein_coding|CODING|FBtr0336459|4|1);INTRON(MODIFIER||||528|CG31145|protein_coding|CODING|FBtr008448…	-
FBgn0010398	2L_10519812_SNP	A	G	0.2121	7	26	2.2e-05	0.203468	SiteClass[FBgn0010398|Lrr47|DOWNSTREAM|543],TranscriptAnnot[DOWNSTREAM(MODIFIER||828||428|Lrr47|protein_coding|CODING|FBtr0080092||1);DOWNSTREAM(MODIFIER||543||428|Lrr47|protein_coding|CODING|FBtr0331671||1);INTERGENIC(MODIFIER||||||||||1)]	The gene Leucine-rich repeat 47 is referred to in FlyBase by the symbol Dmel\Lrr47 (CG6098, FBgn0010398). It is a protein_coding_gene from Drosophila melanogaster. It has 2 annotated transcripts and 2 polypeptides (1 unique). Gene sequence location is 2L:10517335..10519269. It has the cytological map location 31F5. Protein features are: Leucine-rich repeat; Leucine-rich repeat domain, L domain-li…
FBtr0080092	2L_10519812_SNP	A	G	0.2121	7	26	2.2e-05	0.203468	SiteClass[FBgn0010398|Lrr47|DOWNSTREAM|543],TranscriptAnnot[DOWNSTREAM(MODIFIER||828||428|Lrr47|protein_coding|CODING|FBtr0080092||1);DOWNSTREAM(MODIFIER||543||428|Lrr47|protein_coding|CODING|FBtr0331671||1);INTERGENIC(MODIFIER||||||||||1)]	-
FBtr0331671	2L_10519812_SNP	A	G	0.2121	7	26	2.2e-05	0.203468	SiteClass[FBgn0010398|Lrr47|DOWNSTREAM|543],TranscriptAnnot[DOWNSTREAM(MODIFIER||828||428|Lrr47|protein_coding|CODING|FBtr0080092||1);DOWNSTREAM(MODIFIER||543||428|Lrr47|protein_coding|CODING|FBtr0331671||1);INTERGENIC(MODIFIER||||||||||1)]	-
FBgn0263039	3L_644865_DEL	TCGG	T	0.125	4	28	2.21e-05	0.203468	SiteClass[FBgn0263039|CR43334|DOWNSTREAM|966],TranscriptAnnot[DOWNSTREAM(MODIFIER||966|||CR43334|ncRNA|NON_CODING|FBtr0306918||1);INTERGENIC(MODIFIER||||||||||1)]	This gene is referred to in FlyBase by the symbol Dmel\CR43334 (FBgn0263039). It is a non_protein_coding_gene from Drosophila melanogaster. It has 3 annotated transcripts. Gene sequence location is 3L:628435..643900. It has the cytological map location 61C7. Its molecular function is unknown. The biological processes in which it is involved are not known. 3 alleles are reported. The phenotype of …
FBtr0306918	3L_644865_DEL	TCGG	T	0.125	4	28	2.21e-05	0.203468	SiteClass[FBgn0263039|CR43334|DOWNSTREAM|966],TranscriptAnnot[DOWNSTREAM(MODIFIER||966|||CR43334|ncRNA|NON_CODING|FBtr0306918||1);INTERGENIC(MODIFIER||||||||||1)]	-
FBgn0027492	3R_23387883_SNP	A	T	0.1111	4	32	2.24e-05	0.204958	SiteClass[FBgn0027492|wdb|UTR_3_PRIME|0;FBgn0039525|CG5646|UPSTREAM|842],TranscriptAnnot[UTR_3_PRIME(MODIFIER||3408||524|wdb|protein_coding|CODING|FBtr0085204|10|1);UTR_3_PRIME(MODIFIER||3408||524|wdb|protein_coding|CODING|FBtr0085208|9|1);UTR_3_PRIME(MODIFIER||3408||524|wdb|protein_coding|CODING|FBtr0085205|9|1);UPSTREAM(MODIFIER||842||303|CG5646|protein_coding|CODING|FBtr0085210||1)]	The gene widerborst is referred to in FlyBase by the symbol Dmel\wdb (CG5643, FBgn0027492). It is a protein_coding_gene from Drosophila melanogaster. It has 6 annotated transcripts and 6 polypeptides (1 unique). Gene sequence location is 3R:27561675..27582241. It has the cytological map location 98A6-98A8. Protein features are: Armadillo-type fold; Protein phosphatase 2A, regulatory B subunit, B5…
FBgn0039525	3R_23387883_SNP	A	T	0.1111	4	32	2.24e-05	0.204958	SiteClass[FBgn0027492|wdb|UTR_3_PRIME|0;FBgn0039525|CG5646|UPSTREAM|842],TranscriptAnnot[UTR_3_PRIME(MODIFIER||3408||524|wdb|protein_coding|CODING|FBtr0085204|10|1);UTR_3_PRIME(MODIFIER||3408||524|wdb|protein_coding|CODING|FBtr0085208|9|1);UTR_3_PRIME(MODIFIER||3408||524|wdb|protein_coding|CODING|FBtr0085205|9|1);UPSTREAM(MODIFIER||842||303|CG5646|protein_coding|CODING|FBtr0085210||1)]	This gene is referred to in FlyBase by the symbol Dmel\CG5646 (FBgn0039525). It is a protein_coding_gene from Drosophila melanogaster. It has one annotated transcript and one polypeptide. Gene sequence location is 3R:27559379..27561319. It has the cytological map location 98A6. Protein features are: Mitochondrial carrier domain; Mitochondrial substrate/solute carrier. Its molecular function is de…
FBtr0085204	3R_23387883_SNP	A	T	0.1111	4	32	2.24e-05	0.204958	SiteClass[FBgn0027492|wdb|UTR_3_PRIME|0;FBgn0039525|CG5646|UPSTREAM|842],TranscriptAnnot[UTR_3_PRIME(MODIFIER||3408||524|wdb|protein_coding|CODING|FBtr0085204|10|1);UTR_3_PRIME(MODIFIER||3408||524|wdb|protein_coding|CODING|FBtr0085208|9|1);UTR_3_PRIME(MODIFIER||3408||524|wdb|protein_coding|CODING|FBtr0085205|9|1);UPSTREAM(MODIFIER||842||303|CG5646|protein_coding|CODING|FBtr0085210||1)]	-
FBtr0085208	3R_23387883_SNP	A	T	0.1111	4	32	2.24e-05	0.204958	SiteClass[FBgn0027492|wdb|UTR_3_PRIME|0;FBgn0039525|CG5646|UPSTREAM|842],TranscriptAnnot[UTR_3_PRIME(MODIFIER||3408||524|wdb|protein_coding|CODING|FBtr0085204|10|1);UTR_3_PRIME(MODIFIER||3408||524|wdb|protein_coding|CODING|FBtr0085208|9|1);UTR_3_PRIME(MODIFIER||3408||524|wdb|protein_coding|CODING|FBtr0085205|9|1);UPSTREAM(MODIFIER||842||303|CG5646|protein_coding|CODING|FBtr0085210||1)]	-
FBtr0085205	3R_23387883_SNP	A	T	0.1111	4	32	2.24e-05	0.204958	SiteClass[FBgn0027492|wdb|UTR_3_PRIME|0;FBgn0039525|CG5646|UPSTREAM|842],TranscriptAnnot[UTR_3_PRIME(MODIFIER||3408||524|wdb|protein_coding|CODING|FBtr0085204|10|1);UTR_3_PRIME(MODIFIER||3408||524|wdb|protein_coding|CODING|FBtr0085208|9|1);UTR_3_PRIME(MODIFIER||3408||524|wdb|protein_coding|CODING|FBtr0085205|9|1);UPSTREAM(MODIFIER||842||303|CG5646|protein_coding|CODING|FBtr0085210||1)]	-
FBtr0085210	3R_23387883_SNP	A	T	0.1111	4	32	2.24e-05	0.204958	SiteClass[FBgn0027492|wdb|UTR_3_PRIME|0;FBgn0039525|CG5646|UPSTREAM|842],TranscriptAnnot[UTR_3_PRIME(MODIFIER||3408||524|wdb|protein_coding|CODING|FBtr0085204|10|1);UTR_3_PRIME(MODIFIER||3408||524|wdb|protein_coding|CODING|FBtr0085208|9|1);UTR_3_PRIME(MODIFIER||3408||524|wdb|protein_coding|CODING|FBtr0085205|9|1);UPSTREAM(MODIFIER||842||303|CG5646|protein_coding|CODING|FBtr0085210||1)]	-
FBgn0039530	3R_23448129_DEL	G	GTCATCCGCCG	0.1389	5	31	2.28e-05	0.207525	SiteClass[FBgn0039530|Tusp|INTRON|0;FBgn0039529|CG5612|DOWNSTREAM|951],TranscriptAnnot[DOWNSTREAM(MODIFIER||951||428|CG5612|protein_coding|CODING|FBtr0085200||1);INTRON(MODIFIER||||1432|Tusp|protein_coding|CODING|FBtr0302589|2|1);INTRON(MODIFIER||||1432|Tusp|protein_coding|CODING|FBtr0302590|2|1);INTRON(MODIFIER||||1433|Tusp|protein_coding|CODING|FBtr0335245|2|1);INTRON(MODIFIER||||1430|Tusp|prot…	The gene Tusp is referred to in FlyBase by the symbol Dmel\Tusp (CG5586, FBgn0039530). It is a protein_coding_gene from Drosophila melanogaster. It has 4 annotated transcripts and 4 polypeptides (3 unique). Gene sequence location is 3R:27607879..27634932. It has the cytological map location 98A10-98A12. Protein features are: SOCS box domain; Tubby C-terminal-like domain; Tubby, C-terminal; WD40 r…
FBgn0039529	3R_23448129_DEL	G	GTCATCCGCCG	0.1389	5	31	2.28e-05	0.207525	SiteClass[FBgn0039530|Tusp|INTRON|0;FBgn0039529|CG5612|DOWNSTREAM|951],TranscriptAnnot[DOWNSTREAM(MODIFIER||951||428|CG5612|protein_coding|CODING|FBtr0085200||1);INTRON(MODIFIER||||1432|Tusp|protein_coding|CODING|FBtr0302589|2|1);INTRON(MODIFIER||||1432|Tusp|protein_coding|CODING|FBtr0302590|2|1);INTRON(MODIFIER||||1433|Tusp|protein_coding|CODING|FBtr0335245|2|1);INTRON(MODIFIER||||1430|Tusp|prot…	This gene is referred to in FlyBase by the symbol Dmel\CG5612 (FBgn0039529). It is a protein_coding_gene from Drosophila melanogaster. It has one annotated transcript and one polypeptide. Gene sequence location is 3R:27623359..27626011. It has the cytological map location 98A11-98A12. Its molecular function is unknown. The biological processes in which it is involved are not known. 2 alleles are …
FBtr0085200	3R_23448129_DEL	G	GTCATCCGCCG	0.1389	5	31	2.28e-05	0.207525	SiteClass[FBgn0039530|Tusp|INTRON|0;FBgn0039529|CG5612|DOWNSTREAM|951],TranscriptAnnot[DOWNSTREAM(MODIFIER||951||428|CG5612|protein_coding|CODING|FBtr0085200||1);INTRON(MODIFIER||||1432|Tusp|protein_coding|CODING|FBtr0302589|2|1);INTRON(MODIFIER||||1432|Tusp|protein_coding|CODING|FBtr0302590|2|1);INTRON(MODIFIER||||1433|Tusp|protein_coding|CODING|FBtr0335245|2|1);INTRON(MODIFIER||||1430|Tusp|prot…	-
FBtr0302589	3R_23448129_DEL	G	GTCATCCGCCG	0.1389	5	31	2.28e-05	0.207525	SiteClass[FBgn0039530|Tusp|INTRON|0;FBgn0039529|CG5612|DOWNSTREAM|951],TranscriptAnnot[DOWNSTREAM(MODIFIER||951||428|CG5612|protein_coding|CODING|FBtr0085200||1);INTRON(MODIFIER||||1432|Tusp|protein_coding|CODING|FBtr0302589|2|1);INTRON(MODIFIER||||1432|Tusp|protein_coding|CODING|FBtr0302590|2|1);INTRON(MODIFIER||||1433|Tusp|protein_coding|CODING|FBtr0335245|2|1);INTRON(MODIFIER||||1430|Tusp|prot…	-
FBtr0302590	3R_23448129_DEL	G	GTCATCCGCCG	0.1389	5	31	2.28e-05	0.207525	SiteClass[FBgn0039530|Tusp|INTRON|0;FBgn0039529|CG5612|DOWNSTREAM|951],TranscriptAnnot[DOWNSTREAM(MODIFIER||951||428|CG5612|protein_coding|CODING|FBtr0085200||1);INTRON(MODIFIER||||1432|Tusp|protein_coding|CODING|FBtr0302589|2|1);INTRON(MODIFIER||||1432|Tusp|protein_coding|CODING|FBtr0302590|2|1);INTRON(MODIFIER||||1433|Tusp|protein_coding|CODING|FBtr0335245|2|1);INTRON(MODIFIER||||1430|Tusp|prot…	-
FBtr0335245	3R_23448129_DEL	G	GTCATCCGCCG	0.1389	5	31	2.28e-05	0.207525	SiteClass[FBgn0039530|Tusp|INTRON|0;FBgn0039529|CG5612|DOWNSTREAM|951],TranscriptAnnot[DOWNSTREAM(MODIFIER||951||428|CG5612|protein_coding|CODING|FBtr0085200||1);INTRON(MODIFIER||||1432|Tusp|protein_coding|CODING|FBtr0302589|2|1);INTRON(MODIFIER||||1432|Tusp|protein_coding|CODING|FBtr0302590|2|1);INTRON(MODIFIER||||1433|Tusp|protein_coding|CODING|FBtr0335245|2|1);INTRON(MODIFIER||||1430|Tusp|prot…	-
FBtr0335246	3R_23448129_DEL	G	GTCATCCGCCG	0.1389	5	31	2.28e-05	0.207525	SiteClass[FBgn0039530|Tusp|INTRON|0;FBgn0039529|CG5612|DOWNSTREAM|951],TranscriptAnnot[DOWNSTREAM(MODIFIER||951||428|CG5612|protein_coding|CODING|FBtr0085200||1);INTRON(MODIFIER||||1432|Tusp|protein_coding|CODING|FBtr0302589|2|1);INTRON(MODIFIER||||1432|Tusp|protein_coding|CODING|FBtr0302590|2|1);INTRON(MODIFIER||||1433|Tusp|protein_coding|CODING|FBtr0335245|2|1);INTRON(MODIFIER||||1430|Tusp|prot…	-
FBgn0038980	3R_18341316_SNP	G	A	0.1111	4	32	2.34e-05	0.207955	SiteClass[FBgn0038980|Octbeta1R|DOWNSTREAM|22],TranscriptAnnot[DOWNSTREAM(MODIFIER||22||428|Octbeta1R|protein_coding|CODING|FBtr0301484||1);INTRON(MODIFIER||||508|Octbeta1R|protein_coding|CODING|FBtr0084260|7|1);INTRON(MODIFIER||||508|Octbeta1R|protein_coding|CODING|FBtr0331930|7|1);INTRON(MODIFIER||||421|Octbeta1R|protein_coding|CODING|FBtr0100322|8|1)]	The gene Octopamine Œ_1 receptor is referred to in FlyBase by the symbol Dmel\OctŒ_1R (CG6919, FBgn0038980). It is a protein_coding_gene from Drosophila melanogaster. It has 4 annotated transcripts and 4 polypeptides (3 unique). Gene sequence location is 3R:22497215..22520078. It has the cytological map location 94B1-94B2. Protein features are: Adrenoceptor family; G protein-coupled receptor, rho…
FBtr0301484	3R_18341316_SNP	G	A	0.1111	4	32	2.34e-05	0.207955	SiteClass[FBgn0038980|Octbeta1R|DOWNSTREAM|22],TranscriptAnnot[DOWNSTREAM(MODIFIER||22||428|Octbeta1R|protein_coding|CODING|FBtr0301484||1);INTRON(MODIFIER||||508|Octbeta1R|protein_coding|CODING|FBtr0084260|7|1);INTRON(MODIFIER||||508|Octbeta1R|protein_coding|CODING|FBtr0331930|7|1);INTRON(MODIFIER||||421|Octbeta1R|protein_coding|CODING|FBtr0100322|8|1)]	-
FBtr0084260	3R_18341316_SNP	G	A	0.1111	4	32	2.34e-05	0.207955	SiteClass[FBgn0038980|Octbeta1R|DOWNSTREAM|22],TranscriptAnnot[DOWNSTREAM(MODIFIER||22||428|Octbeta1R|protein_coding|CODING|FBtr0301484||1);INTRON(MODIFIER||||508|Octbeta1R|protein_coding|CODING|FBtr0084260|7|1);INTRON(MODIFIER||||508|Octbeta1R|protein_coding|CODING|FBtr0331930|7|1);INTRON(MODIFIER||||421|Octbeta1R|protein_coding|CODING|FBtr0100322|8|1)]	-
FBtr0331930	3R_18341316_SNP	G	A	0.1111	4	32	2.34e-05	0.207955	SiteClass[FBgn0038980|Octbeta1R|DOWNSTREAM|22],TranscriptAnnot[DOWNSTREAM(MODIFIER||22||428|Octbeta1R|protein_coding|CODING|FBtr0301484||1);INTRON(MODIFIER||||508|Octbeta1R|protein_coding|CODING|FBtr0084260|7|1);INTRON(MODIFIER||||508|Octbeta1R|protein_coding|CODING|FBtr0331930|7|1);INTRON(MODIFIER||||421|Octbeta1R|protein_coding|CODING|FBtr0100322|8|1)]	-
FBtr0100322	3R_18341316_SNP	G	A	0.1111	4	32	2.34e-05	0.207955	SiteClass[FBgn0038980|Octbeta1R|DOWNSTREAM|22],TranscriptAnnot[DOWNSTREAM(MODIFIER||22||428|Octbeta1R|protein_coding|CODING|FBtr0301484||1);INTRON(MODIFIER||||508|Octbeta1R|protein_coding|CODING|FBtr0084260|7|1);INTRON(MODIFIER||||508|Octbeta1R|protein_coding|CODING|FBtr0331930|7|1);INTRON(MODIFIER||||421|Octbeta1R|protein_coding|CODING|FBtr0100322|8|1)]	-
FBgn0038980	3R_18341704_SNP	C	G	0.1111	4	32	2.34e-05	0.207955	SiteClass[FBgn0038980|Octbeta1R|DOWNSTREAM|410],TranscriptAnnot[DOWNSTREAM(MODIFIER||410||428|Octbeta1R|protein_coding|CODING|FBtr0301484||1);INTRON(MODIFIER||||508|Octbeta1R|protein_coding|CODING|FBtr0084260|7|1);INTRON(MODIFIER||||508|Octbeta1R|protein_coding|CODING|FBtr0331930|7|1);INTRON(MODIFIER||||421|Octbeta1R|protein_coding|CODING|FBtr0100322|8|1)]	The gene Octopamine Œ_1 receptor is referred to in FlyBase by the symbol Dmel\OctŒ_1R (CG6919, FBgn0038980). It is a protein_coding_gene from Drosophila melanogaster. It has 4 annotated transcripts and 4 polypeptides (3 unique). Gene sequence location is 3R:22497215..22520078. It has the cytological map location 94B1-94B2. Protein features are: Adrenoceptor family; G protein-coupled receptor, rho…
FBtr0301484	3R_18341704_SNP	C	G	0.1111	4	32	2.34e-05	0.207955	SiteClass[FBgn0038980|Octbeta1R|DOWNSTREAM|410],TranscriptAnnot[DOWNSTREAM(MODIFIER||410||428|Octbeta1R|protein_coding|CODING|FBtr0301484||1);INTRON(MODIFIER||||508|Octbeta1R|protein_coding|CODING|FBtr0084260|7|1);INTRON(MODIFIER||||508|Octbeta1R|protein_coding|CODING|FBtr0331930|7|1);INTRON(MODIFIER||||421|Octbeta1R|protein_coding|CODING|FBtr0100322|8|1)]	-
FBtr0084260	3R_18341704_SNP	C	G	0.1111	4	32	2.34e-05	0.207955	SiteClass[FBgn0038980|Octbeta1R|DOWNSTREAM|410],TranscriptAnnot[DOWNSTREAM(MODIFIER||410||428|Octbeta1R|protein_coding|CODING|FBtr0301484||1);INTRON(MODIFIER||||508|Octbeta1R|protein_coding|CODING|FBtr0084260|7|1);INTRON(MODIFIER||||508|Octbeta1R|protein_coding|CODING|FBtr0331930|7|1);INTRON(MODIFIER||||421|Octbeta1R|protein_coding|CODING|FBtr0100322|8|1)]	-
FBtr0331930	3R_18341704_SNP	C	G	0.1111	4	32	2.34e-05	0.207955	SiteClass[FBgn0038980|Octbeta1R|DOWNSTREAM|410],TranscriptAnnot[DOWNSTREAM(MODIFIER||410||428|Octbeta1R|protein_coding|CODING|FBtr0301484||1);INTRON(MODIFIER||||508|Octbeta1R|protein_coding|CODING|FBtr0084260|7|1);INTRON(MODIFIER||||508|Octbeta1R|protein_coding|CODING|FBtr0331930|7|1);INTRON(MODIFIER||||421|Octbeta1R|protein_coding|CODING|FBtr0100322|8|1)]	-
FBtr0100322	3R_18341704_SNP	C	G	0.1111	4	32	2.34e-05	0.207955	SiteClass[FBgn0038980|Octbeta1R|DOWNSTREAM|410],TranscriptAnnot[DOWNSTREAM(MODIFIER||410||428|Octbeta1R|protein_coding|CODING|FBtr0301484||1);INTRON(MODIFIER||||508|Octbeta1R|protein_coding|CODING|FBtr0084260|7|1);INTRON(MODIFIER||||508|Octbeta1R|protein_coding|CODING|FBtr0331930|7|1);INTRON(MODIFIER||||421|Octbeta1R|protein_coding|CODING|FBtr0100322|8|1)]	-
FBgn0040660	2R_19270590_SNP	C	G	0.1622	6	31	2.34e-05	0.207955	SiteClass[FBgn0040660|CG13551|NON_SYNONYMOUS_CODING|0;FBgn0266011|CR44784|UPSTREAM|416;FBgn0034856|yellow-d2|DOWNSTREAM|476],TranscriptAnnot[NON_SYNONYMOUS_CODING(MODERATE|MISSENSE|Ctg/Gtg|L11V|107|CG13551|protein_coding|CODING|FBtr0072034|2|1);NON_SYNONYMOUS_CODING(MODERATE|MISSENSE|Ctg/Gtg|L11V|107|CG13551|protein_coding|CODING|FBtr0072033|2|1);UPSTREAM(MODIFIER||416|||CR44784|ncRNA|NON_CODING|…	This gene is referred to in FlyBase by the symbol Dmel\CG13551 (FBgn0040660). It is a protein_coding_gene from Drosophila melanogaster. It has 2 annotated transcripts and 2 polypeptides (1 unique). Gene sequence location is 2R:23377866..23383424. It has the cytological map location 59D9. Protein features are: Mitochondrial ATPase inhibitor. Its molecular function is described by: ATPase inhibitor…
FBgn0266011	2R_19270590_SNP	C	G	0.1622	6	31	2.34e-05	0.207955	SiteClass[FBgn0040660|CG13551|NON_SYNONYMOUS_CODING|0;FBgn0266011|CR44784|UPSTREAM|416;FBgn0034856|yellow-d2|DOWNSTREAM|476],TranscriptAnnot[NON_SYNONYMOUS_CODING(MODERATE|MISSENSE|Ctg/Gtg|L11V|107|CG13551|protein_coding|CODING|FBtr0072034|2|1);NON_SYNONYMOUS_CODING(MODERATE|MISSENSE|Ctg/Gtg|L11V|107|CG13551|protein_coding|CODING|FBtr0072033|2|1);UPSTREAM(MODIFIER||416|||CR44784|ncRNA|NON_CODING|…	This gene is referred to in FlyBase by the symbol Dmel\CR44784 (FBgn0266011). It is a non_protein_coding_gene from Drosophila melanogaster. It has one annotated transcript. Gene sequence location is 2R:23383483..23384177. It has the cytological map location 59D9. Its molecular function is unknown. The biological processes in which it is involved are not known. No alleles are reported.
FBgn0034856	2R_19270590_SNP	C	G	0.1622	6	31	2.34e-05	0.207955	SiteClass[FBgn0040660|CG13551|NON_SYNONYMOUS_CODING|0;FBgn0266011|CR44784|UPSTREAM|416;FBgn0034856|yellow-d2|DOWNSTREAM|476],TranscriptAnnot[NON_SYNONYMOUS_CODING(MODERATE|MISSENSE|Ctg/Gtg|L11V|107|CG13551|protein_coding|CODING|FBtr0072034|2|1);NON_SYNONYMOUS_CODING(MODERATE|MISSENSE|Ctg/Gtg|L11V|107|CG13551|protein_coding|CODING|FBtr0072033|2|1);UPSTREAM(MODIFIER||416|||CR44784|ncRNA|NON_CODING|…	The gene yellow-d2 is referred to in FlyBase by the symbol Dmel\yellow-d2 (CG9891, FBgn0034856). It is a protein_coding_gene from Drosophila melanogaster. It has one annotated transcript and one polypeptide. Gene sequence location is 2R:23381197..23382591. It has the cytological map location 59D9. Protein features are: Major royal jelly protein/Protein yellow; Six-bladed beta-propeller, TolB-like…
FBtr0072034	2R_19270590_SNP	C	G	0.1622	6	31	2.34e-05	0.207955	SiteClass[FBgn0040660|CG13551|NON_SYNONYMOUS_CODING|0;FBgn0266011|CR44784|UPSTREAM|416;FBgn0034856|yellow-d2|DOWNSTREAM|476],TranscriptAnnot[NON_SYNONYMOUS_CODING(MODERATE|MISSENSE|Ctg/Gtg|L11V|107|CG13551|protein_coding|CODING|FBtr0072034|2|1);NON_SYNONYMOUS_CODING(MODERATE|MISSENSE|Ctg/Gtg|L11V|107|CG13551|protein_coding|CODING|FBtr0072033|2|1);UPSTREAM(MODIFIER||416|||CR44784|ncRNA|NON_CODING|…	-
FBtr0072033	2R_19270590_SNP	C	G	0.1622	6	31	2.34e-05	0.207955	SiteClass[FBgn0040660|CG13551|NON_SYNONYMOUS_CODING|0;FBgn0266011|CR44784|UPSTREAM|416;FBgn0034856|yellow-d2|DOWNSTREAM|476],TranscriptAnnot[NON_SYNONYMOUS_CODING(MODERATE|MISSENSE|Ctg/Gtg|L11V|107|CG13551|protein_coding|CODING|FBtr0072034|2|1);NON_SYNONYMOUS_CODING(MODERATE|MISSENSE|Ctg/Gtg|L11V|107|CG13551|protein_coding|CODING|FBtr0072033|2|1);UPSTREAM(MODIFIER||416|||CR44784|ncRNA|NON_CODING|…	-
FBtr0343203	2R_19270590_SNP	C	G	0.1622	6	31	2.34e-05	0.207955	SiteClass[FBgn0040660|CG13551|NON_SYNONYMOUS_CODING|0;FBgn0266011|CR44784|UPSTREAM|416;FBgn0034856|yellow-d2|DOWNSTREAM|476],TranscriptAnnot[NON_SYNONYMOUS_CODING(MODERATE|MISSENSE|Ctg/Gtg|L11V|107|CG13551|protein_coding|CODING|FBtr0072034|2|1);NON_SYNONYMOUS_CODING(MODERATE|MISSENSE|Ctg/Gtg|L11V|107|CG13551|protein_coding|CODING|FBtr0072033|2|1);UPSTREAM(MODIFIER||416|||CR44784|ncRNA|NON_CODING|…	-
FBtr0072012	2R_19270590_SNP	C	G	0.1622	6	31	2.34e-05	0.207955	SiteClass[FBgn0040660|CG13551|NON_SYNONYMOUS_CODING|0;FBgn0266011|CR44784|UPSTREAM|416;FBgn0034856|yellow-d2|DOWNSTREAM|476],TranscriptAnnot[NON_SYNONYMOUS_CODING(MODERATE|MISSENSE|Ctg/Gtg|L11V|107|CG13551|protein_coding|CODING|FBtr0072034|2|1);NON_SYNONYMOUS_CODING(MODERATE|MISSENSE|Ctg/Gtg|L11V|107|CG13551|protein_coding|CODING|FBtr0072033|2|1);UPSTREAM(MODIFIER||416|||CR44784|ncRNA|NON_CODING|…	-
FBgn0262735	X_10705184_SNP	C	G	0.1622	6	31	2.38e-05	0.209748	SiteClass[FBgn0262735|Imp|INTRON|0],TranscriptAnnot[INTRON(MODIFIER||||573|Imp|protein_coding|CODING|FBtr0073413|2|1);INTRON(MODIFIER||||573|Imp|protein_coding|CODING|FBtr0073414|3|1);INTRON(MODIFIER||||573|Imp|protein_coding|CODING|FBtr0073415|2|1);INTRON(MODIFIER||||573|Imp|protein_coding|CODING|FBtr0073416|2|1);INTRON(MODIFIER||||573|Imp|protein_coding|CODING|FBtr0073417|3|1);INTRON(MODIFIER||…	The gene IGF-II mRNA-binding protein is referred to in FlyBase by the symbol Dmel\Imp (CG1691, FBgn0262735). It is a protein_coding_gene from Drosophila melanogaster. It has 12 annotated transcripts and 12 polypeptides (5 unique). Gene sequence location is X:10787869..10824277. It has the cytological map location 9F2-9F4. Protein features are: K Homology domain; K Homology domain, type 1; Nucleot…
FBtr0073413	X_10705184_SNP	C	G	0.1622	6	31	2.38e-05	0.209748	SiteClass[FBgn0262735|Imp|INTRON|0],TranscriptAnnot[INTRON(MODIFIER||||573|Imp|protein_coding|CODING|FBtr0073413|2|1);INTRON(MODIFIER||||573|Imp|protein_coding|CODING|FBtr0073414|3|1);INTRON(MODIFIER||||573|Imp|protein_coding|CODING|FBtr0073415|2|1);INTRON(MODIFIER||||573|Imp|protein_coding|CODING|FBtr0073416|2|1);INTRON(MODIFIER||||573|Imp|protein_coding|CODING|FBtr0073417|3|1);INTRON(MODIFIER||…	-
FBtr0073414	X_10705184_SNP	C	G	0.1622	6	31	2.38e-05	0.209748	SiteClass[FBgn0262735|Imp|INTRON|0],TranscriptAnnot[INTRON(MODIFIER||||573|Imp|protein_coding|CODING|FBtr0073413|2|1);INTRON(MODIFIER||||573|Imp|protein_coding|CODING|FBtr0073414|3|1);INTRON(MODIFIER||||573|Imp|protein_coding|CODING|FBtr0073415|2|1);INTRON(MODIFIER||||573|Imp|protein_coding|CODING|FBtr0073416|2|1);INTRON(MODIFIER||||573|Imp|protein_coding|CODING|FBtr0073417|3|1);INTRON(MODIFIER||…	-
FBtr0073415	X_10705184_SNP	C	G	0.1622	6	31	2.38e-05	0.209748	SiteClass[FBgn0262735|Imp|INTRON|0],TranscriptAnnot[INTRON(MODIFIER||||573|Imp|protein_coding|CODING|FBtr0073413|2|1);INTRON(MODIFIER||||573|Imp|protein_coding|CODING|FBtr0073414|3|1);INTRON(MODIFIER||||573|Imp|protein_coding|CODING|FBtr0073415|2|1);INTRON(MODIFIER||||573|Imp|protein_coding|CODING|FBtr0073416|2|1);INTRON(MODIFIER||||573|Imp|protein_coding|CODING|FBtr0073417|3|1);INTRON(MODIFIER||…	-
FBtr0073416	X_10705184_SNP	C	G	0.1622	6	31	2.38e-05	0.209748	SiteClass[FBgn0262735|Imp|INTRON|0],TranscriptAnnot[INTRON(MODIFIER||||573|Imp|protein_coding|CODING|FBtr0073413|2|1);INTRON(MODIFIER||||573|Imp|protein_coding|CODING|FBtr0073414|3|1);INTRON(MODIFIER||||573|Imp|protein_coding|CODING|FBtr0073415|2|1);INTRON(MODIFIER||||573|Imp|protein_coding|CODING|FBtr0073416|2|1);INTRON(MODIFIER||||573|Imp|protein_coding|CODING|FBtr0073417|3|1);INTRON(MODIFIER||…	-
FBtr0073417	X_10705184_SNP	C	G	0.1622	6	31	2.38e-05	0.209748	SiteClass[FBgn0262735|Imp|INTRON|0],TranscriptAnnot[INTRON(MODIFIER||||573|Imp|protein_coding|CODING|FBtr0073413|2|1);INTRON(MODIFIER||||573|Imp|protein_coding|CODING|FBtr0073414|3|1);INTRON(MODIFIER||||573|Imp|protein_coding|CODING|FBtr0073415|2|1);INTRON(MODIFIER||||573|Imp|protein_coding|CODING|FBtr0073416|2|1);INTRON(MODIFIER||||573|Imp|protein_coding|CODING|FBtr0073417|3|1);INTRON(MODIFIER||…	-
FBtr0301409	X_10705184_SNP	C	G	0.1622	6	31	2.38e-05	0.209748	SiteClass[FBgn0262735|Imp|INTRON|0],TranscriptAnnot[INTRON(MODIFIER||||573|Imp|protein_coding|CODING|FBtr0073413|2|1);INTRON(MODIFIER||||573|Imp|protein_coding|CODING|FBtr0073414|3|1);INTRON(MODIFIER||||573|Imp|protein_coding|CODING|FBtr0073415|2|1);INTRON(MODIFIER||||573|Imp|protein_coding|CODING|FBtr0073416|2|1);INTRON(MODIFIER||||573|Imp|protein_coding|CODING|FBtr0073417|3|1);INTRON(MODIFIER||…	-
FBtr0305150	X_10705184_SNP	C	G	0.1622	6	31	2.38e-05	0.209748	SiteClass[FBgn0262735|Imp|INTRON|0],TranscriptAnnot[INTRON(MODIFIER||||573|Imp|protein_coding|CODING|FBtr0073413|2|1);INTRON(MODIFIER||||573|Imp|protein_coding|CODING|FBtr0073414|3|1);INTRON(MODIFIER||||573|Imp|protein_coding|CODING|FBtr0073415|2|1);INTRON(MODIFIER||||573|Imp|protein_coding|CODING|FBtr0073416|2|1);INTRON(MODIFIER||||573|Imp|protein_coding|CODING|FBtr0073417|3|1);INTRON(MODIFIER||…	-
FBtr0346315	X_10705184_SNP	C	G	0.1622	6	31	2.38e-05	0.209748	SiteClass[FBgn0262735|Imp|INTRON|0],TranscriptAnnot[INTRON(MODIFIER||||573|Imp|protein_coding|CODING|FBtr0073413|2|1);INTRON(MODIFIER||||573|Imp|protein_coding|CODING|FBtr0073414|3|1);INTRON(MODIFIER||||573|Imp|protein_coding|CODING|FBtr0073415|2|1);INTRON(MODIFIER||||573|Imp|protein_coding|CODING|FBtr0073416|2|1);INTRON(MODIFIER||||573|Imp|protein_coding|CODING|FBtr0073417|3|1);INTRON(MODIFIER||…	-
FBgn0010575	2R_14208933_SNP	A	G	0.1111	4	32	2.43e-05	0.212688	SiteClass[FBgn0010575|sbb|INTRON|0],TranscriptAnnot[INTRON(MODIFIER||||929|sbb|protein_coding|CODING|FBtr0301548|1|1);INTRON(MODIFIER||||939|sbb|protein_coding|CODING|FBtr0301549|1|1);INTRON(MODIFIER||||2312|sbb|protein_coding|CODING|FBtr0301550|2|1);INTRON(MODIFIER||||2330|sbb|protein_coding|CODING|FBtr0329997|1|1);INTRON(MODIFIER||||2302|sbb|protein_coding|CODING|FBtr0301547|1|1)]	The gene scribbler is referred to in FlyBase by the symbol Dmel\sbb (CG5580, FBgn0010575). It is a protein_coding_gene from Drosophila melanogaster. It has 7 annotated transcripts and 7 polypeptides (5 unique). Gene sequence location is 2R:18278198..18357296. It has the cytological map location 55C2-55C4. Protein features are: Zinc finger, C2H2; Zinc finger, C2H2-like. Its molecular function is d…
FBtr0301548	2R_14208933_SNP	A	G	0.1111	4	32	2.43e-05	0.212688	SiteClass[FBgn0010575|sbb|INTRON|0],TranscriptAnnot[INTRON(MODIFIER||||929|sbb|protein_coding|CODING|FBtr0301548|1|1);INTRON(MODIFIER||||939|sbb|protein_coding|CODING|FBtr0301549|1|1);INTRON(MODIFIER||||2312|sbb|protein_coding|CODING|FBtr0301550|2|1);INTRON(MODIFIER||||2330|sbb|protein_coding|CODING|FBtr0329997|1|1);INTRON(MODIFIER||||2302|sbb|protein_coding|CODING|FBtr0301547|1|1)]	-
FBtr0301549	2R_14208933_SNP	A	G	0.1111	4	32	2.43e-05	0.212688	SiteClass[FBgn0010575|sbb|INTRON|0],TranscriptAnnot[INTRON(MODIFIER||||929|sbb|protein_coding|CODING|FBtr0301548|1|1);INTRON(MODIFIER||||939|sbb|protein_coding|CODING|FBtr0301549|1|1);INTRON(MODIFIER||||2312|sbb|protein_coding|CODING|FBtr0301550|2|1);INTRON(MODIFIER||||2330|sbb|protein_coding|CODING|FBtr0329997|1|1);INTRON(MODIFIER||||2302|sbb|protein_coding|CODING|FBtr0301547|1|1)]	-
FBtr0301550	2R_14208933_SNP	A	G	0.1111	4	32	2.43e-05	0.212688	SiteClass[FBgn0010575|sbb|INTRON|0],TranscriptAnnot[INTRON(MODIFIER||||929|sbb|protein_coding|CODING|FBtr0301548|1|1);INTRON(MODIFIER||||939|sbb|protein_coding|CODING|FBtr0301549|1|1);INTRON(MODIFIER||||2312|sbb|protein_coding|CODING|FBtr0301550|2|1);INTRON(MODIFIER||||2330|sbb|protein_coding|CODING|FBtr0329997|1|1);INTRON(MODIFIER||||2302|sbb|protein_coding|CODING|FBtr0301547|1|1)]	-
FBtr0329997	2R_14208933_SNP	A	G	0.1111	4	32	2.43e-05	0.212688	SiteClass[FBgn0010575|sbb|INTRON|0],TranscriptAnnot[INTRON(MODIFIER||||929|sbb|protein_coding|CODING|FBtr0301548|1|1);INTRON(MODIFIER||||939|sbb|protein_coding|CODING|FBtr0301549|1|1);INTRON(MODIFIER||||2312|sbb|protein_coding|CODING|FBtr0301550|2|1);INTRON(MODIFIER||||2330|sbb|protein_coding|CODING|FBtr0329997|1|1);INTRON(MODIFIER||||2302|sbb|protein_coding|CODING|FBtr0301547|1|1)]	-
FBtr0301547	2R_14208933_SNP	A	G	0.1111	4	32	2.43e-05	0.212688	SiteClass[FBgn0010575|sbb|INTRON|0],TranscriptAnnot[INTRON(MODIFIER||||929|sbb|protein_coding|CODING|FBtr0301548|1|1);INTRON(MODIFIER||||939|sbb|protein_coding|CODING|FBtr0301549|1|1);INTRON(MODIFIER||||2312|sbb|protein_coding|CODING|FBtr0301550|2|1);INTRON(MODIFIER||||2330|sbb|protein_coding|CODING|FBtr0329997|1|1);INTRON(MODIFIER||||2302|sbb|protein_coding|CODING|FBtr0301547|1|1)]	-
FBgn0038642	3R_14516799_SNP	T	G	0.1176	4	30	2.67e-05	0.212855	SiteClass[FBgn0038642|Muc91C|INTRON|0],TranscriptAnnot[INTRON(MODIFIER||||950|Muc91C|protein_coding|CODING|FBtr0083687|2|1);INTRON(MODIFIER||||949|Muc91C|protein_coding|CODING|FBtr0345269|2|1)]	The gene Mucin 91C is referred to in FlyBase by the symbol Dmel\Muc91C (CG7709, FBgn0038642). It is a protein_coding_gene from Drosophila melanogaster. It has 2 annotated transcripts and 2 polypeptides (all unique). Gene sequence location is 3R:18687556..18692719. It has the cytological map location 91C1. Protein features are: Mucin-like domain. Its molecular function is described by: extracellul…
FBtr0083687	3R_14516799_SNP	T	G	0.1176	4	30	2.67e-05	0.212855	SiteClass[FBgn0038642|Muc91C|INTRON|0],TranscriptAnnot[INTRON(MODIFIER||||950|Muc91C|protein_coding|CODING|FBtr0083687|2|1);INTRON(MODIFIER||||949|Muc91C|protein_coding|CODING|FBtr0345269|2|1)]	-
FBtr0345269	3R_14516799_SNP	T	G	0.1176	4	30	2.67e-05	0.212855	SiteClass[FBgn0038642|Muc91C|INTRON|0],TranscriptAnnot[INTRON(MODIFIER||||950|Muc91C|protein_coding|CODING|FBtr0083687|2|1);INTRON(MODIFIER||||949|Muc91C|protein_coding|CODING|FBtr0345269|2|1)]	-
FBgn0267279	2L_17497219_SNP	T	C	0.1111	4	32	2.47e-05	0.212855	SiteClass[FBgn0267279|CR45715|EXON|0;FBgn0003187|qua|UPSTREAM|11;FBgn0032645|CG15142|DOWNSTREAM|775],TranscriptAnnot[UPSTREAM(MODIFIER||11||887|qua|protein_coding|CODING|FBtr0080996||1);DOWNSTREAM(MODIFIER||775||206|CG15142|protein_coding|CODING|FBtr0080995||1);EXON(MODIFIER|||||CR45715|ncRNA|NON_CODING|FBtr0346495|1|1)]	This gene is referred to in FlyBase by the symbol Dmel\CR45715 (FBgn0267279). It is a non_protein_coding_gene from Drosophila melanogaster. It has one annotated transcript. Gene sequence location is 2L:17497011..17497697. It has the cytological map location 36C10. Its molecular function is unknown. The biological processes in which it is involved are not known. No alleles are reported.
FBgn0003187	2L_17497219_SNP	T	C	0.1111	4	32	2.47e-05	0.212855	SiteClass[FBgn0267279|CR45715|EXON|0;FBgn0003187|qua|UPSTREAM|11;FBgn0032645|CG15142|DOWNSTREAM|775],TranscriptAnnot[UPSTREAM(MODIFIER||11||887|qua|protein_coding|CODING|FBtr0080996||1);DOWNSTREAM(MODIFIER||775||206|CG15142|protein_coding|CODING|FBtr0080995||1);EXON(MODIFIER|||||CR45715|ncRNA|NON_CODING|FBtr0346495|1|1)]	The gene quail is referred to in FlyBase by the symbol Dmel\qua (CG6433, FBgn0003187). It is a protein_coding_gene from Drosophila melanogaster. It has 3 annotated transcripts and 3 polypeptides (all unique). Gene sequence location is 2L:17486806..17497208. It has the cytological map location 36C10. Protein features are: ADF-H/Gelsolin-like domain; Gelsolin-like domain; Villin headpiece; Villin/G…
FBgn0032645	2L_17497219_SNP	T	C	0.1111	4	32	2.47e-05	0.212855	SiteClass[FBgn0267279|CR45715|EXON|0;FBgn0003187|qua|UPSTREAM|11;FBgn0032645|CG15142|DOWNSTREAM|775],TranscriptAnnot[UPSTREAM(MODIFIER||11||887|qua|protein_coding|CODING|FBtr0080996||1);DOWNSTREAM(MODIFIER||775||206|CG15142|protein_coding|CODING|FBtr0080995||1);EXON(MODIFIER|||||CR45715|ncRNA|NON_CODING|FBtr0346495|1|1)]	This gene is referred to in FlyBase by the symbol Dmel\CG15142 (FBgn0032645). It is a protein_coding_gene from Drosophila melanogaster. It has one annotated transcript and one polypeptide. Gene sequence location is 2L:17497994..17498821. It has the cytological map location 36C10. Protein features are: Cyclin-dependent kinase 2-associated protein. Its molecular function is unknown. The biological …
FBtr0080996	2L_17497219_SNP	T	C	0.1111	4	32	2.47e-05	0.212855	SiteClass[FBgn0267279|CR45715|EXON|0;FBgn0003187|qua|UPSTREAM|11;FBgn0032645|CG15142|DOWNSTREAM|775],TranscriptAnnot[UPSTREAM(MODIFIER||11||887|qua|protein_coding|CODING|FBtr0080996||1);DOWNSTREAM(MODIFIER||775||206|CG15142|protein_coding|CODING|FBtr0080995||1);EXON(MODIFIER|||||CR45715|ncRNA|NON_CODING|FBtr0346495|1|1)]	-
FBtr0080995	2L_17497219_SNP	T	C	0.1111	4	32	2.47e-05	0.212855	SiteClass[FBgn0267279|CR45715|EXON|0;FBgn0003187|qua|UPSTREAM|11;FBgn0032645|CG15142|DOWNSTREAM|775],TranscriptAnnot[UPSTREAM(MODIFIER||11||887|qua|protein_coding|CODING|FBtr0080996||1);DOWNSTREAM(MODIFIER||775||206|CG15142|protein_coding|CODING|FBtr0080995||1);EXON(MODIFIER|||||CR45715|ncRNA|NON_CODING|FBtr0346495|1|1)]	-
FBtr0346495	2L_17497219_SNP	T	C	0.1111	4	32	2.47e-05	0.212855	SiteClass[FBgn0267279|CR45715|EXON|0;FBgn0003187|qua|UPSTREAM|11;FBgn0032645|CG15142|DOWNSTREAM|775],TranscriptAnnot[UPSTREAM(MODIFIER||11||887|qua|protein_coding|CODING|FBtr0080996||1);DOWNSTREAM(MODIFIER||775||206|CG15142|protein_coding|CODING|FBtr0080995||1);EXON(MODIFIER|||||CR45715|ncRNA|NON_CODING|FBtr0346495|1|1)]	-
FBgn0260866	2R_18478794_SNP	G	A	0.1111	4	32	2.5e-05	0.212855	SiteClass[FBgn0260866|dnr1|INTRON|0],TranscriptAnnot[INTRON(MODIFIER||||676|dnr1|protein_coding|CODING|FBtr0071837|1|1);INTRON(MODIFIER||||696|dnr1|protein_coding|CODING|FBtr0330229|1|1)]	The gene defense repressor 1 is referred to in FlyBase by the symbol Dmel\dnr1 (CG12489, FBgn0260866). It is a protein_coding_gene from Drosophila melanogaster. It has 2 annotated transcripts and 2 polypeptides (all unique). Gene sequence location is 2R:22563152..22592964. It has the cytological map location 58E9-58F1. Protein features are: Band 4.1 domain; FERM central domain; FERM domain; FERM,…
FBtr0071837	2R_18478794_SNP	G	A	0.1111	4	32	2.5e-05	0.212855	SiteClass[FBgn0260866|dnr1|INTRON|0],TranscriptAnnot[INTRON(MODIFIER||||676|dnr1|protein_coding|CODING|FBtr0071837|1|1);INTRON(MODIFIER||||696|dnr1|protein_coding|CODING|FBtr0330229|1|1)]	-
FBtr0330229	2R_18478794_SNP	G	A	0.1111	4	32	2.5e-05	0.212855	SiteClass[FBgn0260866|dnr1|INTRON|0],TranscriptAnnot[INTRON(MODIFIER||||676|dnr1|protein_coding|CODING|FBtr0071837|1|1);INTRON(MODIFIER||||696|dnr1|protein_coding|CODING|FBtr0330229|1|1)]	-
FBgn0260866	2R_18478807_SNP	C	A	0.1111	4	32	2.5e-05	0.212855	SiteClass[FBgn0260866|dnr1|INTRON|0],TranscriptAnnot[INTRON(MODIFIER||||676|dnr1|protein_coding|CODING|FBtr0071837|1|1);INTRON(MODIFIER||||696|dnr1|protein_coding|CODING|FBtr0330229|1|1)]	The gene defense repressor 1 is referred to in FlyBase by the symbol Dmel\dnr1 (CG12489, FBgn0260866). It is a protein_coding_gene from Drosophila melanogaster. It has 2 annotated transcripts and 2 polypeptides (all unique). Gene sequence location is 2R:22563152..22592964. It has the cytological map location 58E9-58F1. Protein features are: Band 4.1 domain; FERM central domain; FERM domain; FERM,…
FBtr0071837	2R_18478807_SNP	C	A	0.1111	4	32	2.5e-05	0.212855	SiteClass[FBgn0260866|dnr1|INTRON|0],TranscriptAnnot[INTRON(MODIFIER||||676|dnr1|protein_coding|CODING|FBtr0071837|1|1);INTRON(MODIFIER||||696|dnr1|protein_coding|CODING|FBtr0330229|1|1)]	-
FBtr0330229	2R_18478807_SNP	C	A	0.1111	4	32	2.5e-05	0.212855	SiteClass[FBgn0260866|dnr1|INTRON|0],TranscriptAnnot[INTRON(MODIFIER||||676|dnr1|protein_coding|CODING|FBtr0071837|1|1);INTRON(MODIFIER||||696|dnr1|protein_coding|CODING|FBtr0330229|1|1)]	-
FBgn0085407	2L_7103777_SNP	C	A	0.129	4	27	2.53e-05	0.212855	SiteClass[FBgn0085407|Pvf3|INTRON|0],TranscriptAnnot[INTRON(MODIFIER||||651|Pvf3|protein_coding|CODING|FBtr0112611|4|1);INTRON(MODIFIER||||482|Pvf3|protein_coding|CODING|FBtr0112612|4|1);INTRON(MODIFIER||||469|Pvf3|protein_coding|CODING|FBtr0301525|3|1);INTRON(MODIFIER||||638|Pvf3|protein_coding|CODING|FBtr0342658|3|1)]	The gene PDGF- and VEGF-related factor 3 is referred to in FlyBase by the symbol Dmel\Pvf3 (CG34378, FBgn0085407). It is a protein_coding_gene from Drosophila melanogaster. It has 4 annotated transcripts and 4 polypeptides (all unique). Gene sequence location is 2L:7098188..7157695. It has the cytological map location 27E1-27E2. Protein features are: Cystine-knot cytokine; PDGF/VEGF domain. Its m…
FBtr0112611	2L_7103777_SNP	C	A	0.129	4	27	2.53e-05	0.212855	SiteClass[FBgn0085407|Pvf3|INTRON|0],TranscriptAnnot[INTRON(MODIFIER||||651|Pvf3|protein_coding|CODING|FBtr0112611|4|1);INTRON(MODIFIER||||482|Pvf3|protein_coding|CODING|FBtr0112612|4|1);INTRON(MODIFIER||||469|Pvf3|protein_coding|CODING|FBtr0301525|3|1);INTRON(MODIFIER||||638|Pvf3|protein_coding|CODING|FBtr0342658|3|1)]	-
FBtr0112612	2L_7103777_SNP	C	A	0.129	4	27	2.53e-05	0.212855	SiteClass[FBgn0085407|Pvf3|INTRON|0],TranscriptAnnot[INTRON(MODIFIER||||651|Pvf3|protein_coding|CODING|FBtr0112611|4|1);INTRON(MODIFIER||||482|Pvf3|protein_coding|CODING|FBtr0112612|4|1);INTRON(MODIFIER||||469|Pvf3|protein_coding|CODING|FBtr0301525|3|1);INTRON(MODIFIER||||638|Pvf3|protein_coding|CODING|FBtr0342658|3|1)]	-
FBtr0301525	2L_7103777_SNP	C	A	0.129	4	27	2.53e-05	0.212855	SiteClass[FBgn0085407|Pvf3|INTRON|0],TranscriptAnnot[INTRON(MODIFIER||||651|Pvf3|protein_coding|CODING|FBtr0112611|4|1);INTRON(MODIFIER||||482|Pvf3|protein_coding|CODING|FBtr0112612|4|1);INTRON(MODIFIER||||469|Pvf3|protein_coding|CODING|FBtr0301525|3|1);INTRON(MODIFIER||||638|Pvf3|protein_coding|CODING|FBtr0342658|3|1)]	-
FBtr0342658	2L_7103777_SNP	C	A	0.129	4	27	2.53e-05	0.212855	SiteClass[FBgn0085407|Pvf3|INTRON|0],TranscriptAnnot[INTRON(MODIFIER||||651|Pvf3|protein_coding|CODING|FBtr0112611|4|1);INTRON(MODIFIER||||482|Pvf3|protein_coding|CODING|FBtr0112612|4|1);INTRON(MODIFIER||||469|Pvf3|protein_coding|CODING|FBtr0301525|3|1);INTRON(MODIFIER||||638|Pvf3|protein_coding|CODING|FBtr0342658|3|1)]	-
FBgn0038980	3R_18330111_SNP	A	G	0.1081	4	33	2.54e-05	0.212855	SiteClass[FBgn0038980|Octbeta1R|INTRON|0],TranscriptAnnot[INTRON(MODIFIER||||508|Octbeta1R|protein_coding|CODING|FBtr0084260|1|1);INTRON(MODIFIER||||421|Octbeta1R|protein_coding|CODING|FBtr0100322|1|1);INTRON(MODIFIER||||428|Octbeta1R|protein_coding|CODING|FBtr0301484|1|1);INTRON(MODIFIER||||508|Octbeta1R|protein_coding|CODING|FBtr0331930|1|1)]	The gene Octopamine Œ_1 receptor is referred to in FlyBase by the symbol Dmel\OctŒ_1R (CG6919, FBgn0038980). It is a protein_coding_gene from Drosophila melanogaster. It has 4 annotated transcripts and 4 polypeptides (3 unique). Gene sequence location is 3R:22497215..22520078. It has the cytological map location 94B1-94B2. Protein features are: Adrenoceptor family; G protein-coupled receptor, rho…
FBtr0084260	3R_18330111_SNP	A	G	0.1081	4	33	2.54e-05	0.212855	SiteClass[FBgn0038980|Octbeta1R|INTRON|0],TranscriptAnnot[INTRON(MODIFIER||||508|Octbeta1R|protein_coding|CODING|FBtr0084260|1|1);INTRON(MODIFIER||||421|Octbeta1R|protein_coding|CODING|FBtr0100322|1|1);INTRON(MODIFIER||||428|Octbeta1R|protein_coding|CODING|FBtr0301484|1|1);INTRON(MODIFIER||||508|Octbeta1R|protein_coding|CODING|FBtr0331930|1|1)]	-
FBtr0100322	3R_18330111_SNP	A	G	0.1081	4	33	2.54e-05	0.212855	SiteClass[FBgn0038980|Octbeta1R|INTRON|0],TranscriptAnnot[INTRON(MODIFIER||||508|Octbeta1R|protein_coding|CODING|FBtr0084260|1|1);INTRON(MODIFIER||||421|Octbeta1R|protein_coding|CODING|FBtr0100322|1|1);INTRON(MODIFIER||||428|Octbeta1R|protein_coding|CODING|FBtr0301484|1|1);INTRON(MODIFIER||||508|Octbeta1R|protein_coding|CODING|FBtr0331930|1|1)]	-
FBtr0301484	3R_18330111_SNP	A	G	0.1081	4	33	2.54e-05	0.212855	SiteClass[FBgn0038980|Octbeta1R|INTRON|0],TranscriptAnnot[INTRON(MODIFIER||||508|Octbeta1R|protein_coding|CODING|FBtr0084260|1|1);INTRON(MODIFIER||||421|Octbeta1R|protein_coding|CODING|FBtr0100322|1|1);INTRON(MODIFIER||||428|Octbeta1R|protein_coding|CODING|FBtr0301484|1|1);INTRON(MODIFIER||||508|Octbeta1R|protein_coding|CODING|FBtr0331930|1|1)]	-
FBtr0331930	3R_18330111_SNP	A	G	0.1081	4	33	2.54e-05	0.212855	SiteClass[FBgn0038980|Octbeta1R|INTRON|0],TranscriptAnnot[INTRON(MODIFIER||||508|Octbeta1R|protein_coding|CODING|FBtr0084260|1|1);INTRON(MODIFIER||||421|Octbeta1R|protein_coding|CODING|FBtr0100322|1|1);INTRON(MODIFIER||||428|Octbeta1R|protein_coding|CODING|FBtr0301484|1|1);INTRON(MODIFIER||||508|Octbeta1R|protein_coding|CODING|FBtr0331930|1|1)]	-
FBgn0034136	2R_12450886_INS	CGCACAATCCC	C	0.1613	5	26	2.64e-05	0.212855	SiteClass[FBgn0034136|DAT|INTRON|0],TranscriptAnnot[INTRON(MODIFIER||||631|DAT|protein_coding|CODING|FBtr0087125|2|1);INTRON(MODIFIER||||644|DAT|protein_coding|CODING|FBtr0330002|2|1)]	The gene Dopamine transporter is referred to in FlyBase by the symbol Dmel\DAT (CG8380, FBgn0034136). It is a protein_coding_gene from Drosophila melanogaster. It has 2 annotated transcripts and 2 polypeptides (all unique). Gene sequence location is 2R:16558567..16565238. It has the cytological map location 53C7-53C8. Protein features are: Sodium:neurotransmitter symporter. Its molecular function…
FBtr0087125	2R_12450886_INS	CGCACAATCCC	C	0.1613	5	26	2.64e-05	0.212855	SiteClass[FBgn0034136|DAT|INTRON|0],TranscriptAnnot[INTRON(MODIFIER||||631|DAT|protein_coding|CODING|FBtr0087125|2|1);INTRON(MODIFIER||||644|DAT|protein_coding|CODING|FBtr0330002|2|1)]	-
FBtr0330002	2R_12450886_INS	CGCACAATCCC	C	0.1613	5	26	2.64e-05	0.212855	SiteClass[FBgn0034136|DAT|INTRON|0],TranscriptAnnot[INTRON(MODIFIER||||631|DAT|protein_coding|CODING|FBtr0087125|2|1);INTRON(MODIFIER||||644|DAT|protein_coding|CODING|FBtr0330002|2|1)]	-
FBgn0261509	2L_1595196_SNP	C	T	0.1081	4	33	2.67e-05	0.212855	SiteClass[FBgn0261509|haf|INTRON|0;FBgn0051935|CG31935|SYNONYMOUS_CODING|0],TranscriptAnnot[SYNONYMOUS_CODING(LOW|SILENT|cgA/cgG|R866|916|CG31935|protein_coding|CODING|FBtr0077916|5|1);INTRON(MODIFIER||||981|haf|protein_coding|CODING|FBtr0310017|2|1);INTRON(MODIFIER||||982|haf|protein_coding|CODING|FBtr0310018|2|1);INTRON(MODIFIER||||981|haf|protein_coding|CODING|FBtr0310019|2|1);INTRON(MODIFIER|…	The gene hattifattener is referred to in FlyBase by the symbol Dmel\haf (CG14351, FBgn0261509). It is a protein_coding_gene from Drosophila melanogaster. It has 5 annotated transcripts and 5 polypeptides (3 unique). Gene sequence location is 2L:1555129..1608404. It has the cytological map location 22A3. Protein features are: Leucine-rich repeat; Leucine-rich repeat domain, L domain-like; Leucine-…
FBgn0051935	2L_1595196_SNP	C	T	0.1081	4	33	2.67e-05	0.212855	SiteClass[FBgn0261509|haf|INTRON|0;FBgn0051935|CG31935|SYNONYMOUS_CODING|0],TranscriptAnnot[SYNONYMOUS_CODING(LOW|SILENT|cgA/cgG|R866|916|CG31935|protein_coding|CODING|FBtr0077916|5|1);INTRON(MODIFIER||||981|haf|protein_coding|CODING|FBtr0310017|2|1);INTRON(MODIFIER||||982|haf|protein_coding|CODING|FBtr0310018|2|1);INTRON(MODIFIER||||981|haf|protein_coding|CODING|FBtr0310019|2|1);INTRON(MODIFIER|…	This gene is referred to in FlyBase by the symbol Dmel\CG31935 (FBgn0051935). It is a protein_coding_gene from Drosophila melanogaster. It has one annotated transcript and one polypeptide. Gene sequence location is 2L:1594822..1611157. It has the cytological map location 22A3. Protein features are: Rab3 GTPase-activating protein catalytic subunit. Its molecular function is described by: GTPase ac…
FBtr0077916	2L_1595196_SNP	C	T	0.1081	4	33	2.67e-05	0.212855	SiteClass[FBgn0261509|haf|INTRON|0;FBgn0051935|CG31935|SYNONYMOUS_CODING|0],TranscriptAnnot[SYNONYMOUS_CODING(LOW|SILENT|cgA/cgG|R866|916|CG31935|protein_coding|CODING|FBtr0077916|5|1);INTRON(MODIFIER||||981|haf|protein_coding|CODING|FBtr0310017|2|1);INTRON(MODIFIER||||982|haf|protein_coding|CODING|FBtr0310018|2|1);INTRON(MODIFIER||||981|haf|protein_coding|CODING|FBtr0310019|2|1);INTRON(MODIFIER|…	-
FBtr0310017	2L_1595196_SNP	C	T	0.1081	4	33	2.67e-05	0.212855	SiteClass[FBgn0261509|haf|INTRON|0;FBgn0051935|CG31935|SYNONYMOUS_CODING|0],TranscriptAnnot[SYNONYMOUS_CODING(LOW|SILENT|cgA/cgG|R866|916|CG31935|protein_coding|CODING|FBtr0077916|5|1);INTRON(MODIFIER||||981|haf|protein_coding|CODING|FBtr0310017|2|1);INTRON(MODIFIER||||982|haf|protein_coding|CODING|FBtr0310018|2|1);INTRON(MODIFIER||||981|haf|protein_coding|CODING|FBtr0310019|2|1);INTRON(MODIFIER|…	-
FBtr0310018	2L_1595196_SNP	C	T	0.1081	4	33	2.67e-05	0.212855	SiteClass[FBgn0261509|haf|INTRON|0;FBgn0051935|CG31935|SYNONYMOUS_CODING|0],TranscriptAnnot[SYNONYMOUS_CODING(LOW|SILENT|cgA/cgG|R866|916|CG31935|protein_coding|CODING|FBtr0077916|5|1);INTRON(MODIFIER||||981|haf|protein_coding|CODING|FBtr0310017|2|1);INTRON(MODIFIER||||982|haf|protein_coding|CODING|FBtr0310018|2|1);INTRON(MODIFIER||||981|haf|protein_coding|CODING|FBtr0310019|2|1);INTRON(MODIFIER|…	-
FBtr0310019	2L_1595196_SNP	C	T	0.1081	4	33	2.67e-05	0.212855	SiteClass[FBgn0261509|haf|INTRON|0;FBgn0051935|CG31935|SYNONYMOUS_CODING|0],TranscriptAnnot[SYNONYMOUS_CODING(LOW|SILENT|cgA/cgG|R866|916|CG31935|protein_coding|CODING|FBtr0077916|5|1);INTRON(MODIFIER||||981|haf|protein_coding|CODING|FBtr0310017|2|1);INTRON(MODIFIER||||982|haf|protein_coding|CODING|FBtr0310018|2|1);INTRON(MODIFIER||||981|haf|protein_coding|CODING|FBtr0310019|2|1);INTRON(MODIFIER|…	-
FBtr0310020	2L_1595196_SNP	C	T	0.1081	4	33	2.67e-05	0.212855	SiteClass[FBgn0261509|haf|INTRON|0;FBgn0051935|CG31935|SYNONYMOUS_CODING|0],TranscriptAnnot[SYNONYMOUS_CODING(LOW|SILENT|cgA/cgG|R866|916|CG31935|protein_coding|CODING|FBtr0077916|5|1);INTRON(MODIFIER||||981|haf|protein_coding|CODING|FBtr0310017|2|1);INTRON(MODIFIER||||982|haf|protein_coding|CODING|FBtr0310018|2|1);INTRON(MODIFIER||||981|haf|protein_coding|CODING|FBtr0310019|2|1);INTRON(MODIFIER|…	-
FBtr0344146	2L_1595196_SNP	C	T	0.1081	4	33	2.67e-05	0.212855	SiteClass[FBgn0261509|haf|INTRON|0;FBgn0051935|CG31935|SYNONYMOUS_CODING|0],TranscriptAnnot[SYNONYMOUS_CODING(LOW|SILENT|cgA/cgG|R866|916|CG31935|protein_coding|CODING|FBtr0077916|5|1);INTRON(MODIFIER||||981|haf|protein_coding|CODING|FBtr0310017|2|1);INTRON(MODIFIER||||982|haf|protein_coding|CODING|FBtr0310018|2|1);INTRON(MODIFIER||||981|haf|protein_coding|CODING|FBtr0310019|2|1);INTRON(MODIFIER|…	-
FBgn0052683	X_10318355_SNP	A	C	0.1081	4	33	2.67e-05	0.212855	SiteClass[FBgn0052683|CG32683|INTRON|0],TranscriptAnnot[INTRON(MODIFIER||||804|CG32683|protein_coding|CODING|FBtr0071463|5|1);INTRON(MODIFIER||||804|CG32683|protein_coding|CODING|FBtr0343034|4|1)]	This gene is referred to in FlyBase by the symbol Dmel\CG32683 (FBgn0052683). It is a protein_coding_gene from Drosophila melanogaster. It has 2 annotated transcripts and 2 polypeptides (1 unique). Gene sequence location is X:10410391..10454895. It has the cytological map location 9C1-9C4. Protein features are: Arrestin; Arrestin C-terminal-like domain; Arrestin, C-terminal; Arrestin, N-terminal;…
FBtr0071463	X_10318355_SNP	A	C	0.1081	4	33	2.67e-05	0.212855	SiteClass[FBgn0052683|CG32683|INTRON|0],TranscriptAnnot[INTRON(MODIFIER||||804|CG32683|protein_coding|CODING|FBtr0071463|5|1);INTRON(MODIFIER||||804|CG32683|protein_coding|CODING|FBtr0343034|4|1)]	-
FBtr0343034	X_10318355_SNP	A	C	0.1081	4	33	2.67e-05	0.212855	SiteClass[FBgn0052683|CG32683|INTRON|0],TranscriptAnnot[INTRON(MODIFIER||||804|CG32683|protein_coding|CODING|FBtr0071463|5|1);INTRON(MODIFIER||||804|CG32683|protein_coding|CODING|FBtr0343034|4|1)]	-
FBgn0259175	3L_14710594_SNP	T	G	0.1351	5	32	2.78e-05	0.212855	SiteClass[FBgn0259175|ome|INTRON|0],TranscriptAnnot[INTRON(MODIFIER||||923|ome|protein_coding|CODING|FBtr0299649|2|1);INTRON(MODIFIER||||802|ome|protein_coding|CODING|FBtr0299650|1|1);INTRON(MODIFIER||||1040|ome|protein_coding|CODING|FBtr0299651|1|1);INTRON(MODIFIER||||784|ome|protein_coding|CODING|FBtr0333043|1|1)]	The gene omega is referred to in FlyBase by the symbol Dmel\ome (CG42280, FBgn0259175). It is a protein_coding_gene from Drosophila melanogaster. It has 4 annotated transcripts and 4 polypeptides (all unique). Gene sequence location is 3L:14672839..14747868. It has the cytological map location 70E7-70E8. Protein features are: Alpha/Beta hydrolase fold; Dipeptidylpeptidase IV, N-terminal domain; P…
FBtr0299649	3L_14710594_SNP	T	G	0.1351	5	32	2.78e-05	0.212855	SiteClass[FBgn0259175|ome|INTRON|0],TranscriptAnnot[INTRON(MODIFIER||||923|ome|protein_coding|CODING|FBtr0299649|2|1);INTRON(MODIFIER||||802|ome|protein_coding|CODING|FBtr0299650|1|1);INTRON(MODIFIER||||1040|ome|protein_coding|CODING|FBtr0299651|1|1);INTRON(MODIFIER||||784|ome|protein_coding|CODING|FBtr0333043|1|1)]	-
FBtr0299650	3L_14710594_SNP	T	G	0.1351	5	32	2.78e-05	0.212855	SiteClass[FBgn0259175|ome|INTRON|0],TranscriptAnnot[INTRON(MODIFIER||||923|ome|protein_coding|CODING|FBtr0299649|2|1);INTRON(MODIFIER||||802|ome|protein_coding|CODING|FBtr0299650|1|1);INTRON(MODIFIER||||1040|ome|protein_coding|CODING|FBtr0299651|1|1);INTRON(MODIFIER||||784|ome|protein_coding|CODING|FBtr0333043|1|1)]	-
FBtr0299651	3L_14710594_SNP	T	G	0.1351	5	32	2.78e-05	0.212855	SiteClass[FBgn0259175|ome|INTRON|0],TranscriptAnnot[INTRON(MODIFIER||||923|ome|protein_coding|CODING|FBtr0299649|2|1);INTRON(MODIFIER||||802|ome|protein_coding|CODING|FBtr0299650|1|1);INTRON(MODIFIER||||1040|ome|protein_coding|CODING|FBtr0299651|1|1);INTRON(MODIFIER||||784|ome|protein_coding|CODING|FBtr0333043|1|1)]	-
FBtr0333043	3L_14710594_SNP	T	G	0.1351	5	32	2.78e-05	0.212855	SiteClass[FBgn0259175|ome|INTRON|0],TranscriptAnnot[INTRON(MODIFIER||||923|ome|protein_coding|CODING|FBtr0299649|2|1);INTRON(MODIFIER||||802|ome|protein_coding|CODING|FBtr0299650|1|1);INTRON(MODIFIER||||1040|ome|protein_coding|CODING|FBtr0299651|1|1);INTRON(MODIFIER||||784|ome|protein_coding|CODING|FBtr0333043|1|1)]	-
FBgn0004359	3R_22715372_SNP	G	A	0.1389	5	31	2.79e-05	0.212855	SiteClass[FBgn0004359|T48|INTRON|0],TranscriptAnnot[INTRON(MODIFIER||||419|T48|protein_coding|CODING|FBtr0085065|2|1);INTRON(MODIFIER||||419|T48|protein_coding|CODING|FBtr0336724|2|1)]	The gene Transcript 48 is referred to in FlyBase by the symbol Dmel\T48 (CG5507, FBgn0004359). It is a protein_coding_gene from Drosophila melanogaster. It has 2 annotated transcripts and 2 polypeptides (1 unique). Gene sequence location is 3R:26881734..26910997. It has the cytological map location 97D5-97D7. Protein features are: Growth factor receptor cysteine-rich domain. Its molecular functio…
FBtr0085065	3R_22715372_SNP	G	A	0.1389	5	31	2.79e-05	0.212855	SiteClass[FBgn0004359|T48|INTRON|0],TranscriptAnnot[INTRON(MODIFIER||||419|T48|protein_coding|CODING|FBtr0085065|2|1);INTRON(MODIFIER||||419|T48|protein_coding|CODING|FBtr0336724|2|1)]	-
FBtr0336724	3R_22715372_SNP	G	A	0.1389	5	31	2.79e-05	0.212855	SiteClass[FBgn0004359|T48|INTRON|0],TranscriptAnnot[INTRON(MODIFIER||||419|T48|protein_coding|CODING|FBtr0085065|2|1);INTRON(MODIFIER||||419|T48|protein_coding|CODING|FBtr0336724|2|1)]	-
FBgn0028372	2R_15561155_SNP	A	G	0.1429	5	30	2.82e-05	0.212855	SiteClass[FBgn0028372|isopeptidase-T-3|DOWNSTREAM|173],TranscriptAnnot[DOWNSTREAM(MODIFIER||475||435|isopeptidase-T-3|protein_coding|CODING|FBtr0086474||1);DOWNSTREAM(MODIFIER||173||557|isopeptidase-T-3|protein_coding|CODING|FBtr0086473||1);DOWNSTREAM(MODIFIER||173||561|isopeptidase-T-3|protein_coding|CODING|FBtr0330247||1);INTERGENIC(MODIFIER||||||||||1)]	The gene isopeptidase-T-3 is referred to in FlyBase by the symbol Dmel\isopeptidase-T-3 (CG11025, FBgn0028372). It is a protein_coding_gene from Drosophila melanogaster. It has 3 annotated transcripts and 3 polypeptides (all unique). Gene sequence location is 2R:19670618..19673477. It has the cytological map location 56E1. Protein features are: UBA-like; Ubiquitin-associated domain. Its molecular…
FBtr0086474	2R_15561155_SNP	A	G	0.1429	5	30	2.82e-05	0.212855	SiteClass[FBgn0028372|isopeptidase-T-3|DOWNSTREAM|173],TranscriptAnnot[DOWNSTREAM(MODIFIER||475||435|isopeptidase-T-3|protein_coding|CODING|FBtr0086474||1);DOWNSTREAM(MODIFIER||173||557|isopeptidase-T-3|protein_coding|CODING|FBtr0086473||1);DOWNSTREAM(MODIFIER||173||561|isopeptidase-T-3|protein_coding|CODING|FBtr0330247||1);INTERGENIC(MODIFIER||||||||||1)]	-
FBtr0086473	2R_15561155_SNP	A	G	0.1429	5	30	2.82e-05	0.212855	SiteClass[FBgn0028372|isopeptidase-T-3|DOWNSTREAM|173],TranscriptAnnot[DOWNSTREAM(MODIFIER||475||435|isopeptidase-T-3|protein_coding|CODING|FBtr0086474||1);DOWNSTREAM(MODIFIER||173||557|isopeptidase-T-3|protein_coding|CODING|FBtr0086473||1);DOWNSTREAM(MODIFIER||173||561|isopeptidase-T-3|protein_coding|CODING|FBtr0330247||1);INTERGENIC(MODIFIER||||||||||1)]	-
FBtr0330247	2R_15561155_SNP	A	G	0.1429	5	30	2.82e-05	0.212855	SiteClass[FBgn0028372|isopeptidase-T-3|DOWNSTREAM|173],TranscriptAnnot[DOWNSTREAM(MODIFIER||475||435|isopeptidase-T-3|protein_coding|CODING|FBtr0086474||1);DOWNSTREAM(MODIFIER||173||557|isopeptidase-T-3|protein_coding|CODING|FBtr0086473||1);DOWNSTREAM(MODIFIER||173||561|isopeptidase-T-3|protein_coding|CODING|FBtr0330247||1);INTERGENIC(MODIFIER||||||||||1)]	-
FBgn0085407	2L_7103793_SNP	G	C	0.1111	4	32	2.85e-05	0.212855	SiteClass[FBgn0085407|Pvf3|INTRON|0],TranscriptAnnot[INTRON(MODIFIER||||651|Pvf3|protein_coding|CODING|FBtr0112611|4|1);INTRON(MODIFIER||||482|Pvf3|protein_coding|CODING|FBtr0112612|4|1);INTRON(MODIFIER||||469|Pvf3|protein_coding|CODING|FBtr0301525|3|1);INTRON(MODIFIER||||638|Pvf3|protein_coding|CODING|FBtr0342658|3|1)]	The gene PDGF- and VEGF-related factor 3 is referred to in FlyBase by the symbol Dmel\Pvf3 (CG34378, FBgn0085407). It is a protein_coding_gene from Drosophila melanogaster. It has 4 annotated transcripts and 4 polypeptides (all unique). Gene sequence location is 2L:7098188..7157695. It has the cytological map location 27E1-27E2. Protein features are: Cystine-knot cytokine; PDGF/VEGF domain. Its m…
FBtr0112611	2L_7103793_SNP	G	C	0.1111	4	32	2.85e-05	0.212855	SiteClass[FBgn0085407|Pvf3|INTRON|0],TranscriptAnnot[INTRON(MODIFIER||||651|Pvf3|protein_coding|CODING|FBtr0112611|4|1);INTRON(MODIFIER||||482|Pvf3|protein_coding|CODING|FBtr0112612|4|1);INTRON(MODIFIER||||469|Pvf3|protein_coding|CODING|FBtr0301525|3|1);INTRON(MODIFIER||||638|Pvf3|protein_coding|CODING|FBtr0342658|3|1)]	-
FBtr0112612	2L_7103793_SNP	G	C	0.1111	4	32	2.85e-05	0.212855	SiteClass[FBgn0085407|Pvf3|INTRON|0],TranscriptAnnot[INTRON(MODIFIER||||651|Pvf3|protein_coding|CODING|FBtr0112611|4|1);INTRON(MODIFIER||||482|Pvf3|protein_coding|CODING|FBtr0112612|4|1);INTRON(MODIFIER||||469|Pvf3|protein_coding|CODING|FBtr0301525|3|1);INTRON(MODIFIER||||638|Pvf3|protein_coding|CODING|FBtr0342658|3|1)]	-
FBtr0301525	2L_7103793_SNP	G	C	0.1111	4	32	2.85e-05	0.212855	SiteClass[FBgn0085407|Pvf3|INTRON|0],TranscriptAnnot[INTRON(MODIFIER||||651|Pvf3|protein_coding|CODING|FBtr0112611|4|1);INTRON(MODIFIER||||482|Pvf3|protein_coding|CODING|FBtr0112612|4|1);INTRON(MODIFIER||||469|Pvf3|protein_coding|CODING|FBtr0301525|3|1);INTRON(MODIFIER||||638|Pvf3|protein_coding|CODING|FBtr0342658|3|1)]	-
FBtr0342658	2L_7103793_SNP	G	C	0.1111	4	32	2.85e-05	0.212855	SiteClass[FBgn0085407|Pvf3|INTRON|0],TranscriptAnnot[INTRON(MODIFIER||||651|Pvf3|protein_coding|CODING|FBtr0112611|4|1);INTRON(MODIFIER||||482|Pvf3|protein_coding|CODING|FBtr0112612|4|1);INTRON(MODIFIER||||469|Pvf3|protein_coding|CODING|FBtr0301525|3|1);INTRON(MODIFIER||||638|Pvf3|protein_coding|CODING|FBtr0342658|3|1)]	-
FBgn0085407	2L_7104050_SNP	A	G	0.1111	4	32	2.85e-05	0.212855	SiteClass[FBgn0085407|Pvf3|INTRON|0],TranscriptAnnot[INTRON(MODIFIER||||651|Pvf3|protein_coding|CODING|FBtr0112611|4|1);INTRON(MODIFIER||||482|Pvf3|protein_coding|CODING|FBtr0112612|4|1);INTRON(MODIFIER||||469|Pvf3|protein_coding|CODING|FBtr0301525|3|1);INTRON(MODIFIER||||638|Pvf3|protein_coding|CODING|FBtr0342658|3|1)]	The gene PDGF- and VEGF-related factor 3 is referred to in FlyBase by the symbol Dmel\Pvf3 (CG34378, FBgn0085407). It is a protein_coding_gene from Drosophila melanogaster. It has 4 annotated transcripts and 4 polypeptides (all unique). Gene sequence location is 2L:7098188..7157695. It has the cytological map location 27E1-27E2. Protein features are: Cystine-knot cytokine; PDGF/VEGF domain. Its m…
FBtr0112611	2L_7104050_SNP	A	G	0.1111	4	32	2.85e-05	0.212855	SiteClass[FBgn0085407|Pvf3|INTRON|0],TranscriptAnnot[INTRON(MODIFIER||||651|Pvf3|protein_coding|CODING|FBtr0112611|4|1);INTRON(MODIFIER||||482|Pvf3|protein_coding|CODING|FBtr0112612|4|1);INTRON(MODIFIER||||469|Pvf3|protein_coding|CODING|FBtr0301525|3|1);INTRON(MODIFIER||||638|Pvf3|protein_coding|CODING|FBtr0342658|3|1)]	-
FBtr0112612	2L_7104050_SNP	A	G	0.1111	4	32	2.85e-05	0.212855	SiteClass[FBgn0085407|Pvf3|INTRON|0],TranscriptAnnot[INTRON(MODIFIER||||651|Pvf3|protein_coding|CODING|FBtr0112611|4|1);INTRON(MODIFIER||||482|Pvf3|protein_coding|CODING|FBtr0112612|4|1);INTRON(MODIFIER||||469|Pvf3|protein_coding|CODING|FBtr0301525|3|1);INTRON(MODIFIER||||638|Pvf3|protein_coding|CODING|FBtr0342658|3|1)]	-
FBtr0301525	2L_7104050_SNP	A	G	0.1111	4	32	2.85e-05	0.212855	SiteClass[FBgn0085407|Pvf3|INTRON|0],TranscriptAnnot[INTRON(MODIFIER||||651|Pvf3|protein_coding|CODING|FBtr0112611|4|1);INTRON(MODIFIER||||482|Pvf3|protein_coding|CODING|FBtr0112612|4|1);INTRON(MODIFIER||||469|Pvf3|protein_coding|CODING|FBtr0301525|3|1);INTRON(MODIFIER||||638|Pvf3|protein_coding|CODING|FBtr0342658|3|1)]	-
FBtr0342658	2L_7104050_SNP	A	G	0.1111	4	32	2.85e-05	0.212855	SiteClass[FBgn0085407|Pvf3|INTRON|0],TranscriptAnnot[INTRON(MODIFIER||||651|Pvf3|protein_coding|CODING|FBtr0112611|4|1);INTRON(MODIFIER||||482|Pvf3|protein_coding|CODING|FBtr0112612|4|1);INTRON(MODIFIER||||469|Pvf3|protein_coding|CODING|FBtr0301525|3|1);INTRON(MODIFIER||||638|Pvf3|protein_coding|CODING|FBtr0342658|3|1)]	-
FBgn0085407	2L_7104092_SNP	A	C	0.1111	4	32	2.85e-05	0.212855	SiteClass[FBgn0085407|Pvf3|INTRON|0],TranscriptAnnot[INTRON(MODIFIER||||651|Pvf3|protein_coding|CODING|FBtr0112611|4|1);INTRON(MODIFIER||||482|Pvf3|protein_coding|CODING|FBtr0112612|4|1);INTRON(MODIFIER||||469|Pvf3|protein_coding|CODING|FBtr0301525|3|1);INTRON(MODIFIER||||638|Pvf3|protein_coding|CODING|FBtr0342658|3|1)]	The gene PDGF- and VEGF-related factor 3 is referred to in FlyBase by the symbol Dmel\Pvf3 (CG34378, FBgn0085407). It is a protein_coding_gene from Drosophila melanogaster. It has 4 annotated transcripts and 4 polypeptides (all unique). Gene sequence location is 2L:7098188..7157695. It has the cytological map location 27E1-27E2. Protein features are: Cystine-knot cytokine; PDGF/VEGF domain. Its m…
FBtr0112611	2L_7104092_SNP	A	C	0.1111	4	32	2.85e-05	0.212855	SiteClass[FBgn0085407|Pvf3|INTRON|0],TranscriptAnnot[INTRON(MODIFIER||||651|Pvf3|protein_coding|CODING|FBtr0112611|4|1);INTRON(MODIFIER||||482|Pvf3|protein_coding|CODING|FBtr0112612|4|1);INTRON(MODIFIER||||469|Pvf3|protein_coding|CODING|FBtr0301525|3|1);INTRON(MODIFIER||||638|Pvf3|protein_coding|CODING|FBtr0342658|3|1)]	-
FBtr0112612	2L_7104092_SNP	A	C	0.1111	4	32	2.85e-05	0.212855	SiteClass[FBgn0085407|Pvf3|INTRON|0],TranscriptAnnot[INTRON(MODIFIER||||651|Pvf3|protein_coding|CODING|FBtr0112611|4|1);INTRON(MODIFIER||||482|Pvf3|protein_coding|CODING|FBtr0112612|4|1);INTRON(MODIFIER||||469|Pvf3|protein_coding|CODING|FBtr0301525|3|1);INTRON(MODIFIER||||638|Pvf3|protein_coding|CODING|FBtr0342658|3|1)]	-
FBtr0301525	2L_7104092_SNP	A	C	0.1111	4	32	2.85e-05	0.212855	SiteClass[FBgn0085407|Pvf3|INTRON|0],TranscriptAnnot[INTRON(MODIFIER||||651|Pvf3|protein_coding|CODING|FBtr0112611|4|1);INTRON(MODIFIER||||482|Pvf3|protein_coding|CODING|FBtr0112612|4|1);INTRON(MODIFIER||||469|Pvf3|protein_coding|CODING|FBtr0301525|3|1);INTRON(MODIFIER||||638|Pvf3|protein_coding|CODING|FBtr0342658|3|1)]	-
FBtr0342658	2L_7104092_SNP	A	C	0.1111	4	32	2.85e-05	0.212855	SiteClass[FBgn0085407|Pvf3|INTRON|0],TranscriptAnnot[INTRON(MODIFIER||||651|Pvf3|protein_coding|CODING|FBtr0112611|4|1);INTRON(MODIFIER||||482|Pvf3|protein_coding|CODING|FBtr0112612|4|1);INTRON(MODIFIER||||469|Pvf3|protein_coding|CODING|FBtr0301525|3|1);INTRON(MODIFIER||||638|Pvf3|protein_coding|CODING|FBtr0342658|3|1)]	-
FBgn0052683	X_10320028_SNP	A	C	0.1111	4	32	2.85e-05	0.212855	SiteClass[FBgn0052683|CG32683|INTRON|0],TranscriptAnnot[INTRON(MODIFIER||||804|CG32683|protein_coding|CODING|FBtr0071463|4|1);INTRON(MODIFIER||||804|CG32683|protein_coding|CODING|FBtr0343034|3|1)]	This gene is referred to in FlyBase by the symbol Dmel\CG32683 (FBgn0052683). It is a protein_coding_gene from Drosophila melanogaster. It has 2 annotated transcripts and 2 polypeptides (1 unique). Gene sequence location is X:10410391..10454895. It has the cytological map location 9C1-9C4. Protein features are: Arrestin; Arrestin C-terminal-like domain; Arrestin, C-terminal; Arrestin, N-terminal;…
FBtr0071463	X_10320028_SNP	A	C	0.1111	4	32	2.85e-05	0.212855	SiteClass[FBgn0052683|CG32683|INTRON|0],TranscriptAnnot[INTRON(MODIFIER||||804|CG32683|protein_coding|CODING|FBtr0071463|4|1);INTRON(MODIFIER||||804|CG32683|protein_coding|CODING|FBtr0343034|3|1)]	-
FBtr0343034	X_10320028_SNP	A	C	0.1111	4	32	2.85e-05	0.212855	SiteClass[FBgn0052683|CG32683|INTRON|0],TranscriptAnnot[INTRON(MODIFIER||||804|CG32683|protein_coding|CODING|FBtr0071463|4|1);INTRON(MODIFIER||||804|CG32683|protein_coding|CODING|FBtr0343034|3|1)]	-
FBgn0030484	X_13299868_SNP	T	A	0.1111	4	32	2.91e-05	0.212855	SiteClass[FBgn0030484|GstT4|INTRON|0],TranscriptAnnot[INTRON(MODIFIER||||237|GstT4|protein_coding|CODING|FBtr0073778|1|1)]	The gene Glutathione S transferase T4 is referred to in FlyBase by the symbol Dmel\GstT4 (CG1681, FBgn0030484). It is a protein_coding_gene from Drosophila melanogaster. It has one annotated transcript and one polypeptide. Gene sequence location is X:13404749..13409323. It has the cytological map location 11F4. Protein features are: Glutathione S-transferase, C-terminal; Glutathione S-transferase…
FBtr0073778	X_13299868_SNP	T	A	0.1111	4	32	2.91e-05	0.212855	SiteClass[FBgn0030484|GstT4|INTRON|0],TranscriptAnnot[INTRON(MODIFIER||||237|GstT4|protein_coding|CODING|FBtr0073778|1|1)]	-
FBgn0266948	3L_14232912_DEL	A	AG	0.1081	4	33	2.89e-05	0.212855	SiteClass[FBgn0266948|CR45399|UPSTREAM|373],TranscriptAnnot[UPSTREAM(MODIFIER||373|||CR45399|ncRNA|NON_CODING|FBtr0345840||1);INTERGENIC(MODIFIER||||||||||1)]	This gene is referred to in FlyBase by the symbol Dmel\CR45399 (FBgn0266948). It is a non_protein_coding_gene from Drosophila melanogaster. It has one annotated transcript. Gene sequence location is 3L:14238607..14239440. It has the cytological map location 70D4. Its molecular function is unknown. The biological processes in which it is involved are not known. No alleles are reported.
FBtr0345840	3L_14232912_DEL	A	AG	0.1081	4	33	2.89e-05	0.212855	SiteClass[FBgn0266948|CR45399|UPSTREAM|373],TranscriptAnnot[UPSTREAM(MODIFIER||373|||CR45399|ncRNA|NON_CODING|FBtr0345840||1);INTERGENIC(MODIFIER||||||||||1)]	-
FBgn0046887	3R_23367233_SNP	T	G	0.1111	4	32	2.89e-05	0.212855	SiteClass[FBgn0046887|Gr98b|UPSTREAM|986],TranscriptAnnot[UPSTREAM(MODIFIER||986||403|Gr98b|protein_coding|CODING|FBtr0085186||1);INTERGENIC(MODIFIER||||||||||1)]	The gene Gustatory receptor 98b is referred to in FlyBase by the symbol Dmel\Gr98b (CG31059, FBgn0046887). It is a protein_coding_gene from Drosophila melanogaster. It has one annotated transcript and one polypeptide. Gene sequence location is 3R:27542497..27543888. It has the cytological map location 98A4. Protein features are: 7TM chemoreceptor. Its molecular function is described by: taste rec…
FBtr0085186	3R_23367233_SNP	T	G	0.1111	4	32	2.89e-05	0.212855	SiteClass[FBgn0046887|Gr98b|UPSTREAM|986],TranscriptAnnot[UPSTREAM(MODIFIER||986||403|Gr98b|protein_coding|CODING|FBtr0085186||1);INTERGENIC(MODIFIER||||||||||1)]	-
FBgn0046887	3R_23367243_SNP	T	C	0.1111	4	32	2.89e-05	0.212855	SiteClass[FBgn0046887|Gr98b|UPSTREAM|976],TranscriptAnnot[UPSTREAM(MODIFIER||976||403|Gr98b|protein_coding|CODING|FBtr0085186||1);INTERGENIC(MODIFIER||||||||||1)]	The gene Gustatory receptor 98b is referred to in FlyBase by the symbol Dmel\Gr98b (CG31059, FBgn0046887). It is a protein_coding_gene from Drosophila melanogaster. It has one annotated transcript and one polypeptide. Gene sequence location is 3R:27542497..27543888. It has the cytological map location 98A4. Protein features are: 7TM chemoreceptor. Its molecular function is described by: taste rec…
FBtr0085186	3R_23367243_SNP	T	C	0.1111	4	32	2.89e-05	0.212855	SiteClass[FBgn0046887|Gr98b|UPSTREAM|976],TranscriptAnnot[UPSTREAM(MODIFIER||976||403|Gr98b|protein_coding|CODING|FBtr0085186||1);INTERGENIC(MODIFIER||||||||||1)]	-
FBgn0260941	3L_12201869_SNP	T	A	0.1081	4	33	2.71e-05	0.212855	SiteClass[FBgn0260941|app|DOWNSTREAM|91],TranscriptAnnot[DOWNSTREAM(MODIFIER||91||755|app|protein_coding|CODING|FBtr0301054||1);DOWNSTREAM(MODIFIER||91||755|app|protein_coding|CODING|FBtr0301055||1);INTRON(MODIFIER||||693|app|protein_coding|CODING|FBtr0301056|11|1);INTRON(MODIFIER||||693|app|protein_coding|CODING|FBtr0301057|10|1);INTRON(MODIFIER||||693|app|protein_coding|CODING|FBtr0334102|9|1);…	The gene approximated is referred to in FlyBase by the symbol Dmel\app (CG42318, FBgn0260941). It is a protein_coding_gene from Drosophila melanogaster. It has 10 annotated transcripts and 10 polypeptides (5 unique). Gene sequence location is 3L:12206238..12266841. It has the cytological map location 69A2. Protein features are: Zinc finger, DHHC-type, palmitoyltransferase. Its molecular function …
FBtr0301054	3L_12201869_SNP	T	A	0.1081	4	33	2.71e-05	0.212855	SiteClass[FBgn0260941|app|DOWNSTREAM|91],TranscriptAnnot[DOWNSTREAM(MODIFIER||91||755|app|protein_coding|CODING|FBtr0301054||1);DOWNSTREAM(MODIFIER||91||755|app|protein_coding|CODING|FBtr0301055||1);INTRON(MODIFIER||||693|app|protein_coding|CODING|FBtr0301056|11|1);INTRON(MODIFIER||||693|app|protein_coding|CODING|FBtr0301057|10|1);INTRON(MODIFIER||||693|app|protein_coding|CODING|FBtr0334102|9|1);…	-
FBtr0301055	3L_12201869_SNP	T	A	0.1081	4	33	2.71e-05	0.212855	SiteClass[FBgn0260941|app|DOWNSTREAM|91],TranscriptAnnot[DOWNSTREAM(MODIFIER||91||755|app|protein_coding|CODING|FBtr0301054||1);DOWNSTREAM(MODIFIER||91||755|app|protein_coding|CODING|FBtr0301055||1);INTRON(MODIFIER||||693|app|protein_coding|CODING|FBtr0301056|11|1);INTRON(MODIFIER||||693|app|protein_coding|CODING|FBtr0301057|10|1);INTRON(MODIFIER||||693|app|protein_coding|CODING|FBtr0334102|9|1);…	-
FBtr0301056	3L_12201869_SNP	T	A	0.1081	4	33	2.71e-05	0.212855	SiteClass[FBgn0260941|app|DOWNSTREAM|91],TranscriptAnnot[DOWNSTREAM(MODIFIER||91||755|app|protein_coding|CODING|FBtr0301054||1);DOWNSTREAM(MODIFIER||91||755|app|protein_coding|CODING|FBtr0301055||1);INTRON(MODIFIER||||693|app|protein_coding|CODING|FBtr0301056|11|1);INTRON(MODIFIER||||693|app|protein_coding|CODING|FBtr0301057|10|1);INTRON(MODIFIER||||693|app|protein_coding|CODING|FBtr0334102|9|1);…	-
FBtr0301057	3L_12201869_SNP	T	A	0.1081	4	33	2.71e-05	0.212855	SiteClass[FBgn0260941|app|DOWNSTREAM|91],TranscriptAnnot[DOWNSTREAM(MODIFIER||91||755|app|protein_coding|CODING|FBtr0301054||1);DOWNSTREAM(MODIFIER||91||755|app|protein_coding|CODING|FBtr0301055||1);INTRON(MODIFIER||||693|app|protein_coding|CODING|FBtr0301056|11|1);INTRON(MODIFIER||||693|app|protein_coding|CODING|FBtr0301057|10|1);INTRON(MODIFIER||||693|app|protein_coding|CODING|FBtr0334102|9|1);…	-
FBtr0334102	3L_12201869_SNP	T	A	0.1081	4	33	2.71e-05	0.212855	SiteClass[FBgn0260941|app|DOWNSTREAM|91],TranscriptAnnot[DOWNSTREAM(MODIFIER||91||755|app|protein_coding|CODING|FBtr0301054||1);DOWNSTREAM(MODIFIER||91||755|app|protein_coding|CODING|FBtr0301055||1);INTRON(MODIFIER||||693|app|protein_coding|CODING|FBtr0301056|11|1);INTRON(MODIFIER||||693|app|protein_coding|CODING|FBtr0301057|10|1);INTRON(MODIFIER||||693|app|protein_coding|CODING|FBtr0334102|9|1);…	-
FBtr0334103	3L_12201869_SNP	T	A	0.1081	4	33	2.71e-05	0.212855	SiteClass[FBgn0260941|app|DOWNSTREAM|91],TranscriptAnnot[DOWNSTREAM(MODIFIER||91||755|app|protein_coding|CODING|FBtr0301054||1);DOWNSTREAM(MODIFIER||91||755|app|protein_coding|CODING|FBtr0301055||1);INTRON(MODIFIER||||693|app|protein_coding|CODING|FBtr0301056|11|1);INTRON(MODIFIER||||693|app|protein_coding|CODING|FBtr0301057|10|1);INTRON(MODIFIER||||693|app|protein_coding|CODING|FBtr0334102|9|1);…	-
FBtr0339925	3L_12201869_SNP	T	A	0.1081	4	33	2.71e-05	0.212855	SiteClass[FBgn0260941|app|DOWNSTREAM|91],TranscriptAnnot[DOWNSTREAM(MODIFIER||91||755|app|protein_coding|CODING|FBtr0301054||1);DOWNSTREAM(MODIFIER||91||755|app|protein_coding|CODING|FBtr0301055||1);INTRON(MODIFIER||||693|app|protein_coding|CODING|FBtr0301056|11|1);INTRON(MODIFIER||||693|app|protein_coding|CODING|FBtr0301057|10|1);INTRON(MODIFIER||||693|app|protein_coding|CODING|FBtr0334102|9|1);…	-
FBtr0304661	3L_12201869_SNP	T	A	0.1081	4	33	2.71e-05	0.212855	SiteClass[FBgn0260941|app|DOWNSTREAM|91],TranscriptAnnot[DOWNSTREAM(MODIFIER||91||755|app|protein_coding|CODING|FBtr0301054||1);DOWNSTREAM(MODIFIER||91||755|app|protein_coding|CODING|FBtr0301055||1);INTRON(MODIFIER||||693|app|protein_coding|CODING|FBtr0301056|11|1);INTRON(MODIFIER||||693|app|protein_coding|CODING|FBtr0301057|10|1);INTRON(MODIFIER||||693|app|protein_coding|CODING|FBtr0334102|9|1);…	-
FBgn0036678	3L_16926399_SNP	A	G	0.1081	4	33	2.89e-05	0.212855	SiteClass[FBgn0036678|CG11905|NON_SYNONYMOUS_CODING|0],TranscriptAnnot[NON_SYNONYMOUS_CODING(MODERATE|MISSENSE|gCc/gTc|A26V|403|CG11905|protein_coding|CODING|FBtr0075300|3|1);NON_SYNONYMOUS_CODING(MODERATE|MISSENSE|gCc/gTc|A26V|607|CG11905|protein_coding|CODING|FBtr0075303|3|1);NON_SYNONYMOUS_CODING(MODERATE|MISSENSE|gCc/gTc|A26V|315|CG11905|protein_coding|CODING|FBtr0075304|2|1);NON_SYNONYMOUS_C…	This gene is referred to in FlyBase by the symbol Dmel\CG11905 (FBgn0036678). It is a protein_coding_gene from Drosophila melanogaster. It has 10 annotated transcripts and 10 polypeptides (4 unique). Gene sequence location is 3L:16928381..16935536. It has the cytological map location 73D6-73D7. Protein features are: Domain of unknown function DUF4774. Its molecular function is unknown. The biolog…
FBtr0075300	3L_16926399_SNP	A	G	0.1081	4	33	2.89e-05	0.212855	SiteClass[FBgn0036678|CG11905|NON_SYNONYMOUS_CODING|0],TranscriptAnnot[NON_SYNONYMOUS_CODING(MODERATE|MISSENSE|gCc/gTc|A26V|403|CG11905|protein_coding|CODING|FBtr0075300|3|1);NON_SYNONYMOUS_CODING(MODERATE|MISSENSE|gCc/gTc|A26V|607|CG11905|protein_coding|CODING|FBtr0075303|3|1);NON_SYNONYMOUS_CODING(MODERATE|MISSENSE|gCc/gTc|A26V|315|CG11905|protein_coding|CODING|FBtr0075304|2|1);NON_SYNONYMOUS_C…	-
FBtr0075303	3L_16926399_SNP	A	G	0.1081	4	33	2.89e-05	0.212855	SiteClass[FBgn0036678|CG11905|NON_SYNONYMOUS_CODING|0],TranscriptAnnot[NON_SYNONYMOUS_CODING(MODERATE|MISSENSE|gCc/gTc|A26V|403|CG11905|protein_coding|CODING|FBtr0075300|3|1);NON_SYNONYMOUS_CODING(MODERATE|MISSENSE|gCc/gTc|A26V|607|CG11905|protein_coding|CODING|FBtr0075303|3|1);NON_SYNONYMOUS_CODING(MODERATE|MISSENSE|gCc/gTc|A26V|315|CG11905|protein_coding|CODING|FBtr0075304|2|1);NON_SYNONYMOUS_C…	-
FBtr0075304	3L_16926399_SNP	A	G	0.1081	4	33	2.89e-05	0.212855	SiteClass[FBgn0036678|CG11905|NON_SYNONYMOUS_CODING|0],TranscriptAnnot[NON_SYNONYMOUS_CODING(MODERATE|MISSENSE|gCc/gTc|A26V|403|CG11905|protein_coding|CODING|FBtr0075300|3|1);NON_SYNONYMOUS_CODING(MODERATE|MISSENSE|gCc/gTc|A26V|607|CG11905|protein_coding|CODING|FBtr0075303|3|1);NON_SYNONYMOUS_CODING(MODERATE|MISSENSE|gCc/gTc|A26V|315|CG11905|protein_coding|CODING|FBtr0075304|2|1);NON_SYNONYMOUS_C…	-
FBtr0075301	3L_16926399_SNP	A	G	0.1081	4	33	2.89e-05	0.212855	SiteClass[FBgn0036678|CG11905|NON_SYNONYMOUS_CODING|0],TranscriptAnnot[NON_SYNONYMOUS_CODING(MODERATE|MISSENSE|gCc/gTc|A26V|403|CG11905|protein_coding|CODING|FBtr0075300|3|1);NON_SYNONYMOUS_CODING(MODERATE|MISSENSE|gCc/gTc|A26V|607|CG11905|protein_coding|CODING|FBtr0075303|3|1);NON_SYNONYMOUS_CODING(MODERATE|MISSENSE|gCc/gTc|A26V|315|CG11905|protein_coding|CODING|FBtr0075304|2|1);NON_SYNONYMOUS_C…	-
FBtr0075302	3L_16926399_SNP	A	G	0.1081	4	33	2.89e-05	0.212855	SiteClass[FBgn0036678|CG11905|NON_SYNONYMOUS_CODING|0],TranscriptAnnot[NON_SYNONYMOUS_CODING(MODERATE|MISSENSE|gCc/gTc|A26V|403|CG11905|protein_coding|CODING|FBtr0075300|3|1);NON_SYNONYMOUS_CODING(MODERATE|MISSENSE|gCc/gTc|A26V|607|CG11905|protein_coding|CODING|FBtr0075303|3|1);NON_SYNONYMOUS_CODING(MODERATE|MISSENSE|gCc/gTc|A26V|315|CG11905|protein_coding|CODING|FBtr0075304|2|1);NON_SYNONYMOUS_C…	-
FBtr0075306	3L_16926399_SNP	A	G	0.1081	4	33	2.89e-05	0.212855	SiteClass[FBgn0036678|CG11905|NON_SYNONYMOUS_CODING|0],TranscriptAnnot[NON_SYNONYMOUS_CODING(MODERATE|MISSENSE|gCc/gTc|A26V|403|CG11905|protein_coding|CODING|FBtr0075300|3|1);NON_SYNONYMOUS_CODING(MODERATE|MISSENSE|gCc/gTc|A26V|607|CG11905|protein_coding|CODING|FBtr0075303|3|1);NON_SYNONYMOUS_CODING(MODERATE|MISSENSE|gCc/gTc|A26V|315|CG11905|protein_coding|CODING|FBtr0075304|2|1);NON_SYNONYMOUS_C…	-
FBtr0075305	3L_16926399_SNP	A	G	0.1081	4	33	2.89e-05	0.212855	SiteClass[FBgn0036678|CG11905|NON_SYNONYMOUS_CODING|0],TranscriptAnnot[NON_SYNONYMOUS_CODING(MODERATE|MISSENSE|gCc/gTc|A26V|403|CG11905|protein_coding|CODING|FBtr0075300|3|1);NON_SYNONYMOUS_CODING(MODERATE|MISSENSE|gCc/gTc|A26V|607|CG11905|protein_coding|CODING|FBtr0075303|3|1);NON_SYNONYMOUS_CODING(MODERATE|MISSENSE|gCc/gTc|A26V|315|CG11905|protein_coding|CODING|FBtr0075304|2|1);NON_SYNONYMOUS_C…	-
FBtr0113174	3L_16926399_SNP	A	G	0.1081	4	33	2.89e-05	0.212855	SiteClass[FBgn0036678|CG11905|NON_SYNONYMOUS_CODING|0],TranscriptAnnot[NON_SYNONYMOUS_CODING(MODERATE|MISSENSE|gCc/gTc|A26V|403|CG11905|protein_coding|CODING|FBtr0075300|3|1);NON_SYNONYMOUS_CODING(MODERATE|MISSENSE|gCc/gTc|A26V|607|CG11905|protein_coding|CODING|FBtr0075303|3|1);NON_SYNONYMOUS_CODING(MODERATE|MISSENSE|gCc/gTc|A26V|315|CG11905|protein_coding|CODING|FBtr0075304|2|1);NON_SYNONYMOUS_C…	-
FBtr0113173	3L_16926399_SNP	A	G	0.1081	4	33	2.89e-05	0.212855	SiteClass[FBgn0036678|CG11905|NON_SYNONYMOUS_CODING|0],TranscriptAnnot[NON_SYNONYMOUS_CODING(MODERATE|MISSENSE|gCc/gTc|A26V|403|CG11905|protein_coding|CODING|FBtr0075300|3|1);NON_SYNONYMOUS_CODING(MODERATE|MISSENSE|gCc/gTc|A26V|607|CG11905|protein_coding|CODING|FBtr0075303|3|1);NON_SYNONYMOUS_CODING(MODERATE|MISSENSE|gCc/gTc|A26V|315|CG11905|protein_coding|CODING|FBtr0075304|2|1);NON_SYNONYMOUS_C…	-
FBtr0305577	3L_16926399_SNP	A	G	0.1081	4	33	2.89e-05	0.212855	SiteClass[FBgn0036678|CG11905|NON_SYNONYMOUS_CODING|0],TranscriptAnnot[NON_SYNONYMOUS_CODING(MODERATE|MISSENSE|gCc/gTc|A26V|403|CG11905|protein_coding|CODING|FBtr0075300|3|1);NON_SYNONYMOUS_CODING(MODERATE|MISSENSE|gCc/gTc|A26V|607|CG11905|protein_coding|CODING|FBtr0075303|3|1);NON_SYNONYMOUS_CODING(MODERATE|MISSENSE|gCc/gTc|A26V|315|CG11905|protein_coding|CODING|FBtr0075304|2|1);NON_SYNONYMOUS_C…	-
FBgn0036680	3L_16933660_SNP	A	C	0.1111	4	32	2.76e-05	0.212855	SiteClass[FBgn0036680|Cpr73D|NON_SYNONYMOUS_CODING|0],TranscriptAnnot[NON_SYNONYMOUS_CODING(MODERATE|MISSENSE|Gtg/Ttg|V158L|597|Cpr73D|protein_coding|CODING|FBtr0113176|4|1)]	The gene Cuticular protein 73D is referred to in FlyBase by the symbol Dmel\Cpr73D (CG9665, FBgn0036680). It is a protein_coding_gene from Drosophila melanogaster. It has 2 annotated transcripts and 2 polypeptides (all unique). Gene sequence location is 3L:16939100..16957689. It has the cytological map location 73D7-73E1. Protein features are: Insect cuticle protein. Its molecular function is des…
FBtr0113176	3L_16933660_SNP	A	C	0.1111	4	32	2.76e-05	0.212855	SiteClass[FBgn0036680|Cpr73D|NON_SYNONYMOUS_CODING|0],TranscriptAnnot[NON_SYNONYMOUS_CODING(MODERATE|MISSENSE|Gtg/Ttg|V158L|597|Cpr73D|protein_coding|CODING|FBtr0113176|4|1)]	-
FBgn0261509	2L_1595171_SNP	G	T	0.1111	4	32	2.55e-05	0.212855	SiteClass[FBgn0261509|haf|INTRON|0;FBgn0051935|CG31935|SYNONYMOUS_CODING|0],TranscriptAnnot[SYNONYMOUS_CODING(LOW|SILENT|Aga/Cga|R875|916|CG31935|protein_coding|CODING|FBtr0077916|5|1);INTRON(MODIFIER||||981|haf|protein_coding|CODING|FBtr0310017|2|1);INTRON(MODIFIER||||982|haf|protein_coding|CODING|FBtr0310018|2|1);INTRON(MODIFIER||||981|haf|protein_coding|CODING|FBtr0310019|2|1);INTRON(MODIFIER|…	The gene hattifattener is referred to in FlyBase by the symbol Dmel\haf (CG14351, FBgn0261509). It is a protein_coding_gene from Drosophila melanogaster. It has 5 annotated transcripts and 5 polypeptides (3 unique). Gene sequence location is 2L:1555129..1608404. It has the cytological map location 22A3. Protein features are: Leucine-rich repeat; Leucine-rich repeat domain, L domain-like; Leucine-…
FBgn0051935	2L_1595171_SNP	G	T	0.1111	4	32	2.55e-05	0.212855	SiteClass[FBgn0261509|haf|INTRON|0;FBgn0051935|CG31935|SYNONYMOUS_CODING|0],TranscriptAnnot[SYNONYMOUS_CODING(LOW|SILENT|Aga/Cga|R875|916|CG31935|protein_coding|CODING|FBtr0077916|5|1);INTRON(MODIFIER||||981|haf|protein_coding|CODING|FBtr0310017|2|1);INTRON(MODIFIER||||982|haf|protein_coding|CODING|FBtr0310018|2|1);INTRON(MODIFIER||||981|haf|protein_coding|CODING|FBtr0310019|2|1);INTRON(MODIFIER|…	This gene is referred to in FlyBase by the symbol Dmel\CG31935 (FBgn0051935). It is a protein_coding_gene from Drosophila melanogaster. It has one annotated transcript and one polypeptide. Gene sequence location is 2L:1594822..1611157. It has the cytological map location 22A3. Protein features are: Rab3 GTPase-activating protein catalytic subunit. Its molecular function is described by: GTPase ac…
FBtr0077916	2L_1595171_SNP	G	T	0.1111	4	32	2.55e-05	0.212855	SiteClass[FBgn0261509|haf|INTRON|0;FBgn0051935|CG31935|SYNONYMOUS_CODING|0],TranscriptAnnot[SYNONYMOUS_CODING(LOW|SILENT|Aga/Cga|R875|916|CG31935|protein_coding|CODING|FBtr0077916|5|1);INTRON(MODIFIER||||981|haf|protein_coding|CODING|FBtr0310017|2|1);INTRON(MODIFIER||||982|haf|protein_coding|CODING|FBtr0310018|2|1);INTRON(MODIFIER||||981|haf|protein_coding|CODING|FBtr0310019|2|1);INTRON(MODIFIER|…	-
FBtr0310017	2L_1595171_SNP	G	T	0.1111	4	32	2.55e-05	0.212855	SiteClass[FBgn0261509|haf|INTRON|0;FBgn0051935|CG31935|SYNONYMOUS_CODING|0],TranscriptAnnot[SYNONYMOUS_CODING(LOW|SILENT|Aga/Cga|R875|916|CG31935|protein_coding|CODING|FBtr0077916|5|1);INTRON(MODIFIER||||981|haf|protein_coding|CODING|FBtr0310017|2|1);INTRON(MODIFIER||||982|haf|protein_coding|CODING|FBtr0310018|2|1);INTRON(MODIFIER||||981|haf|protein_coding|CODING|FBtr0310019|2|1);INTRON(MODIFIER|…	-
FBtr0310018	2L_1595171_SNP	G	T	0.1111	4	32	2.55e-05	0.212855	SiteClass[FBgn0261509|haf|INTRON|0;FBgn0051935|CG31935|SYNONYMOUS_CODING|0],TranscriptAnnot[SYNONYMOUS_CODING(LOW|SILENT|Aga/Cga|R875|916|CG31935|protein_coding|CODING|FBtr0077916|5|1);INTRON(MODIFIER||||981|haf|protein_coding|CODING|FBtr0310017|2|1);INTRON(MODIFIER||||982|haf|protein_coding|CODING|FBtr0310018|2|1);INTRON(MODIFIER||||981|haf|protein_coding|CODING|FBtr0310019|2|1);INTRON(MODIFIER|…	-
FBtr0310019	2L_1595171_SNP	G	T	0.1111	4	32	2.55e-05	0.212855	SiteClass[FBgn0261509|haf|INTRON|0;FBgn0051935|CG31935|SYNONYMOUS_CODING|0],TranscriptAnnot[SYNONYMOUS_CODING(LOW|SILENT|Aga/Cga|R875|916|CG31935|protein_coding|CODING|FBtr0077916|5|1);INTRON(MODIFIER||||981|haf|protein_coding|CODING|FBtr0310017|2|1);INTRON(MODIFIER||||982|haf|protein_coding|CODING|FBtr0310018|2|1);INTRON(MODIFIER||||981|haf|protein_coding|CODING|FBtr0310019|2|1);INTRON(MODIFIER|…	-
FBtr0310020	2L_1595171_SNP	G	T	0.1111	4	32	2.55e-05	0.212855	SiteClass[FBgn0261509|haf|INTRON|0;FBgn0051935|CG31935|SYNONYMOUS_CODING|0],TranscriptAnnot[SYNONYMOUS_CODING(LOW|SILENT|Aga/Cga|R875|916|CG31935|protein_coding|CODING|FBtr0077916|5|1);INTRON(MODIFIER||||981|haf|protein_coding|CODING|FBtr0310017|2|1);INTRON(MODIFIER||||982|haf|protein_coding|CODING|FBtr0310018|2|1);INTRON(MODIFIER||||981|haf|protein_coding|CODING|FBtr0310019|2|1);INTRON(MODIFIER|…	-
FBtr0344146	2L_1595171_SNP	G	T	0.1111	4	32	2.55e-05	0.212855	SiteClass[FBgn0261509|haf|INTRON|0;FBgn0051935|CG31935|SYNONYMOUS_CODING|0],TranscriptAnnot[SYNONYMOUS_CODING(LOW|SILENT|Aga/Cga|R875|916|CG31935|protein_coding|CODING|FBtr0077916|5|1);INTRON(MODIFIER||||981|haf|protein_coding|CODING|FBtr0310017|2|1);INTRON(MODIFIER||||982|haf|protein_coding|CODING|FBtr0310018|2|1);INTRON(MODIFIER||||981|haf|protein_coding|CODING|FBtr0310019|2|1);INTRON(MODIFIER|…	-
FBgn0041097	2L_1277516_SNP	G	A	0.1429	5	30	2.84e-05	0.212855	SiteClass[FBgn0041097|robo3|INTRON|0],TranscriptAnnot[INTRON(MODIFIER||||1342|robo3|protein_coding|CODING|FBtr0077921|2|1);INTRON(MODIFIER||||1342|robo3|protein_coding|CODING|FBtr0335384|2|1)]	The gene roundabout 3 is referred to in FlyBase by the symbol Dmel\robo3 (CG5423, FBgn0041097). It is a protein_coding_gene from Drosophila melanogaster. It has 2 annotated transcripts and 2 polypeptides (1 unique). Gene sequence location is 2L:1256417..1296596. It has the cytological map location 21F3-21F4. Protein features are: Fibronectin type III; Immunoglobulin I-set; Immunoglobulin subtype;…
FBtr0077921	2L_1277516_SNP	G	A	0.1429	5	30	2.84e-05	0.212855	SiteClass[FBgn0041097|robo3|INTRON|0],TranscriptAnnot[INTRON(MODIFIER||||1342|robo3|protein_coding|CODING|FBtr0077921|2|1);INTRON(MODIFIER||||1342|robo3|protein_coding|CODING|FBtr0335384|2|1)]	-
FBtr0335384	2L_1277516_SNP	G	A	0.1429	5	30	2.84e-05	0.212855	SiteClass[FBgn0041097|robo3|INTRON|0],TranscriptAnnot[INTRON(MODIFIER||||1342|robo3|protein_coding|CODING|FBtr0077921|2|1);INTRON(MODIFIER||||1342|robo3|protein_coding|CODING|FBtr0335384|2|1)]	-
FBgn0266948	3L_14232901_DEL	A	TGGCCATGGC	0.1081	4	33	2.89e-05	0.212855	SiteClass[FBgn0266948|CR45399|UPSTREAM|361],TranscriptAnnot[UPSTREAM(MODIFIER||361|||CR45399|ncRNA|NON_CODING|FBtr0345840||1);INTERGENIC(MODIFIER||||||||||1)]	This gene is referred to in FlyBase by the symbol Dmel\CR45399 (FBgn0266948). It is a non_protein_coding_gene from Drosophila melanogaster. It has one annotated transcript. Gene sequence location is 3L:14238607..14239440. It has the cytological map location 70D4. Its molecular function is unknown. The biological processes in which it is involved are not known. No alleles are reported.
FBtr0345840	3L_14232901_DEL	A	TGGCCATGGC	0.1081	4	33	2.89e-05	0.212855	SiteClass[FBgn0266948|CR45399|UPSTREAM|361],TranscriptAnnot[UPSTREAM(MODIFIER||361|||CR45399|ncRNA|NON_CODING|FBtr0345840||1);INTERGENIC(MODIFIER||||||||||1)]	-
FBgn0046887	3R_23367300_SNP	A	G	0.1111	4	32	2.89e-05	0.212855	SiteClass[FBgn0046887|Gr98b|UPSTREAM|919],TranscriptAnnot[UPSTREAM(MODIFIER||919||403|Gr98b|protein_coding|CODING|FBtr0085186||1);INTERGENIC(MODIFIER||||||||||1)]	The gene Gustatory receptor 98b is referred to in FlyBase by the symbol Dmel\Gr98b (CG31059, FBgn0046887). It is a protein_coding_gene from Drosophila melanogaster. It has one annotated transcript and one polypeptide. Gene sequence location is 3R:27542497..27543888. It has the cytological map location 98A4. Protein features are: 7TM chemoreceptor. Its molecular function is described by: taste rec…
FBtr0085186	3R_23367300_SNP	A	G	0.1111	4	32	2.89e-05	0.212855	SiteClass[FBgn0046887|Gr98b|UPSTREAM|919],TranscriptAnnot[UPSTREAM(MODIFIER||919||403|Gr98b|protein_coding|CODING|FBtr0085186||1);INTERGENIC(MODIFIER||||||||||1)]	-
FBgn0263039	3L_644854_SNP	G	T	0.1111	4	32	3.06e-05	0.22195	SiteClass[FBgn0263039|CR43334|DOWNSTREAM|954],TranscriptAnnot[DOWNSTREAM(MODIFIER||954|||CR43334|ncRNA|NON_CODING|FBtr0306918||1);INTERGENIC(MODIFIER||||||||||1)]	This gene is referred to in FlyBase by the symbol Dmel\CR43334 (FBgn0263039). It is a non_protein_coding_gene from Drosophila melanogaster. It has 3 annotated transcripts. Gene sequence location is 3L:628435..643900. It has the cytological map location 61C7. Its molecular function is unknown. The biological processes in which it is involved are not known. 3 alleles are reported. The phenotype of …
FBtr0306918	3L_644854_SNP	G	T	0.1111	4	32	3.06e-05	0.22195	SiteClass[FBgn0263039|CR43334|DOWNSTREAM|954],TranscriptAnnot[DOWNSTREAM(MODIFIER||954|||CR43334|ncRNA|NON_CODING|FBtr0306918||1);INTERGENIC(MODIFIER||||||||||1)]	-
FBgn0034739	2R_18481975_SNP	T	G	0.1111	4	32	3.08e-05	0.22195	SiteClass[FBgn0034739|CG3927|UPSTREAM|207],TranscriptAnnot[UPSTREAM(MODIFIER||207||270|CG3927|protein_coding|CODING|FBtr0071853||1);INTERGENIC(MODIFIER||||||||||1)]	This gene is referred to in FlyBase by the symbol Dmel\CG3927 (FBgn0034739). It is a protein_coding_gene from Drosophila melanogaster. It has one annotated transcript and one polypeptide. Gene sequence location is 2R:22594677..22596348. It has the cytological map location 58F1. Protein features are: K Homology domain; K Homology domain, type 1. Its molecular function is described by: RNA binding.…
FBtr0071853	2R_18481975_SNP	T	G	0.1111	4	32	3.08e-05	0.22195	SiteClass[FBgn0034739|CG3927|UPSTREAM|207],TranscriptAnnot[UPSTREAM(MODIFIER||207||270|CG3927|protein_coding|CODING|FBtr0071853||1);INTERGENIC(MODIFIER||||||||||1)]	-
FBgn0031730	2L_5712658_SNP	G	C	0.1429	5	30	3.2e-05	0.22842	SiteClass[FBgn0031730|CG7236|SYNONYMOUS_CODING|0],TranscriptAnnot[SYNONYMOUS_CODING(LOW|SILENT|gcC/gcG|A135|412|CG7236|protein_coding|CODING|FBtr0343388|3|1);SYNONYMOUS_CODING(LOW|SILENT|gcC/gcG|A161|438|CG7236|protein_coding|CODING|FBtr0343387|3|1);SYNONYMOUS_CODING(LOW|SILENT|gcC/gcG|A158|435|CG7236|protein_coding|CODING|FBtr0302950|3|1);SYNONYMOUS_CODING(LOW|SILENT|gcC/gcG|A144|421|CG7236|prot…	This gene is referred to in FlyBase by the symbol Dmel\CG7236 (FBgn0031730). It is a protein_coding_gene from Drosophila melanogaster. It has 4 annotated transcripts and 4 polypeptides (all unique). Gene sequence location is 2L:5706374..5713791. It has the cytological map location 25F3. Protein features are: Protein kinase domain; Protein kinase, ATP binding site; Protein kinase-like domain; Seri…
FBtr0343388	2L_5712658_SNP	G	C	0.1429	5	30	3.2e-05	0.22842	SiteClass[FBgn0031730|CG7236|SYNONYMOUS_CODING|0],TranscriptAnnot[SYNONYMOUS_CODING(LOW|SILENT|gcC/gcG|A135|412|CG7236|protein_coding|CODING|FBtr0343388|3|1);SYNONYMOUS_CODING(LOW|SILENT|gcC/gcG|A161|438|CG7236|protein_coding|CODING|FBtr0343387|3|1);SYNONYMOUS_CODING(LOW|SILENT|gcC/gcG|A158|435|CG7236|protein_coding|CODING|FBtr0302950|3|1);SYNONYMOUS_CODING(LOW|SILENT|gcC/gcG|A144|421|CG7236|prot…	-
FBtr0343387	2L_5712658_SNP	G	C	0.1429	5	30	3.2e-05	0.22842	SiteClass[FBgn0031730|CG7236|SYNONYMOUS_CODING|0],TranscriptAnnot[SYNONYMOUS_CODING(LOW|SILENT|gcC/gcG|A135|412|CG7236|protein_coding|CODING|FBtr0343388|3|1);SYNONYMOUS_CODING(LOW|SILENT|gcC/gcG|A161|438|CG7236|protein_coding|CODING|FBtr0343387|3|1);SYNONYMOUS_CODING(LOW|SILENT|gcC/gcG|A158|435|CG7236|protein_coding|CODING|FBtr0302950|3|1);SYNONYMOUS_CODING(LOW|SILENT|gcC/gcG|A144|421|CG7236|prot…	-
FBtr0302950	2L_5712658_SNP	G	C	0.1429	5	30	3.2e-05	0.22842	SiteClass[FBgn0031730|CG7236|SYNONYMOUS_CODING|0],TranscriptAnnot[SYNONYMOUS_CODING(LOW|SILENT|gcC/gcG|A135|412|CG7236|protein_coding|CODING|FBtr0343388|3|1);SYNONYMOUS_CODING(LOW|SILENT|gcC/gcG|A161|438|CG7236|protein_coding|CODING|FBtr0343387|3|1);SYNONYMOUS_CODING(LOW|SILENT|gcC/gcG|A158|435|CG7236|protein_coding|CODING|FBtr0302950|3|1);SYNONYMOUS_CODING(LOW|SILENT|gcC/gcG|A144|421|CG7236|prot…	-
FBtr0343389	2L_5712658_SNP	G	C	0.1429	5	30	3.2e-05	0.22842	SiteClass[FBgn0031730|CG7236|SYNONYMOUS_CODING|0],TranscriptAnnot[SYNONYMOUS_CODING(LOW|SILENT|gcC/gcG|A135|412|CG7236|protein_coding|CODING|FBtr0343388|3|1);SYNONYMOUS_CODING(LOW|SILENT|gcC/gcG|A161|438|CG7236|protein_coding|CODING|FBtr0343387|3|1);SYNONYMOUS_CODING(LOW|SILENT|gcC/gcG|A158|435|CG7236|protein_coding|CODING|FBtr0302950|3|1);SYNONYMOUS_CODING(LOW|SILENT|gcC/gcG|A144|421|CG7236|prot…	-
FBgn0039510	3R_23143665_SNP	T	C	0.1176	4	30	3.2e-05	0.22842	SiteClass[FBgn0039510|CG3339|SYNONYMOUS_CODING|0;FBgn0265314|CR44287|UPSTREAM|385],TranscriptAnnot[SYNONYMOUS_CODING(LOW|SILENT|aaG/aaA|K858|4842|CG3339|protein_coding|CODING|FBtr0273192|7|1);UPSTREAM(MODIFIER||385|||CR44287|ncRNA|NON_CODING|FBtr0339323||1)]	This gene is referred to in FlyBase by the symbol Dmel\CG3339 (FBgn0039510). It is a protein_coding_gene from Drosophila melanogaster. It has one annotated transcript and one polypeptide. Gene sequence location is 3R:27294286..27322325. It has the cytological map location 97F1-97F2. Protein features are: ATPase, dynein-related, AAA domain; Dynein heavy chain; Dynein heavy chain domain; Dynein hea…
FBgn0265314	3R_23143665_SNP	T	C	0.1176	4	30	3.2e-05	0.22842	SiteClass[FBgn0039510|CG3339|SYNONYMOUS_CODING|0;FBgn0265314|CR44287|UPSTREAM|385],TranscriptAnnot[SYNONYMOUS_CODING(LOW|SILENT|aaG/aaA|K858|4842|CG3339|protein_coding|CODING|FBtr0273192|7|1);UPSTREAM(MODIFIER||385|||CR44287|ncRNA|NON_CODING|FBtr0339323||1)]	This gene is referred to in FlyBase by the symbol Dmel\CR44287 (FBgn0265314). It is a non_protein_coding_gene from Drosophila melanogaster. It has one annotated transcript. Gene sequence location is 3R:27318328..27319246. It has the cytological map location 97F2. Its molecular function is unknown. The biological processes in which it is involved are not known. No alleles are reported.
FBtr0273192	3R_23143665_SNP	T	C	0.1176	4	30	3.2e-05	0.22842	SiteClass[FBgn0039510|CG3339|SYNONYMOUS_CODING|0;FBgn0265314|CR44287|UPSTREAM|385],TranscriptAnnot[SYNONYMOUS_CODING(LOW|SILENT|aaG/aaA|K858|4842|CG3339|protein_coding|CODING|FBtr0273192|7|1);UPSTREAM(MODIFIER||385|||CR44287|ncRNA|NON_CODING|FBtr0339323||1)]	-
FBtr0339323	3R_23143665_SNP	T	C	0.1176	4	30	3.2e-05	0.22842	SiteClass[FBgn0039510|CG3339|SYNONYMOUS_CODING|0;FBgn0265314|CR44287|UPSTREAM|385],TranscriptAnnot[SYNONYMOUS_CODING(LOW|SILENT|aaG/aaA|K858|4842|CG3339|protein_coding|CODING|FBtr0273192|7|1);UPSTREAM(MODIFIER||385|||CR44287|ncRNA|NON_CODING|FBtr0339323||1)]	-
FBgn0086251	2L_21148739_SNP	A	G	0.1389	5	31	3.23e-05	0.228794	SiteClass[FBgn0086251|del|UPSTREAM|193],TranscriptAnnot[UPSTREAM(MODIFIER||322||981|del|protein_coding|CODING|FBtr0081502||1);UPSTREAM(MODIFIER||322||978|del|protein_coding|CODING|FBtr0333084||1);UPSTREAM(MODIFIER||193||981|del|protein_coding|CODING|FBtr0333085||1);INTERGENIC(MODIFIER||||||||||1)]	The gene deadlock is referred to in FlyBase by the symbol Dmel\del (CG9252, FBgn0086251). It is a protein_coding_gene from Drosophila melanogaster. It has 3 annotated transcripts and 3 polypeptides (2 unique). Gene sequence location is 2L:21145137..21148546. It has the cytological map location 38A6-38E9. Its molecular function is described by: . It is involved in the biological process described …
FBtr0081502	2L_21148739_SNP	A	G	0.1389	5	31	3.23e-05	0.228794	SiteClass[FBgn0086251|del|UPSTREAM|193],TranscriptAnnot[UPSTREAM(MODIFIER||322||981|del|protein_coding|CODING|FBtr0081502||1);UPSTREAM(MODIFIER||322||978|del|protein_coding|CODING|FBtr0333084||1);UPSTREAM(MODIFIER||193||981|del|protein_coding|CODING|FBtr0333085||1);INTERGENIC(MODIFIER||||||||||1)]	-
FBtr0333084	2L_21148739_SNP	A	G	0.1389	5	31	3.23e-05	0.228794	SiteClass[FBgn0086251|del|UPSTREAM|193],TranscriptAnnot[UPSTREAM(MODIFIER||322||981|del|protein_coding|CODING|FBtr0081502||1);UPSTREAM(MODIFIER||322||978|del|protein_coding|CODING|FBtr0333084||1);UPSTREAM(MODIFIER||193||981|del|protein_coding|CODING|FBtr0333085||1);INTERGENIC(MODIFIER||||||||||1)]	-
FBtr0333085	2L_21148739_SNP	A	G	0.1389	5	31	3.23e-05	0.228794	SiteClass[FBgn0086251|del|UPSTREAM|193],TranscriptAnnot[UPSTREAM(MODIFIER||322||981|del|protein_coding|CODING|FBtr0081502||1);UPSTREAM(MODIFIER||322||978|del|protein_coding|CODING|FBtr0333084||1);UPSTREAM(MODIFIER||193||981|del|protein_coding|CODING|FBtr0333085||1);INTERGENIC(MODIFIER||||||||||1)]	-
FBgn0000439	3R_2627906_SNP	A	C	0.1351	5	32	3.39e-05	0.237207	SiteClass[FBgn0000439|Dfd|UTR_3_PRIME|0],TranscriptAnnot[UTR_3_PRIME(MODIFIER||245||586|Dfd|protein_coding|CODING|FBtr0081621|5|1)]	The gene Deformed is referred to in FlyBase by the symbol Dmel\Dfd (CG2189, FBgn0000439). It is a protein_coding_gene from Drosophila melanogaster. It has one annotated transcript and one polypeptide. Gene sequence location is 3R:6791836..6802428. It has the cytological map location 84A5. Protein features are: Homeobox domain; Homeobox protein, antennapedia type; Homeobox protein, antennapedia ty…
FBtr0081621	3R_2627906_SNP	A	C	0.1351	5	32	3.39e-05	0.237207	SiteClass[FBgn0000439|Dfd|UTR_3_PRIME|0],TranscriptAnnot[UTR_3_PRIME(MODIFIER||245||586|Dfd|protein_coding|CODING|FBtr0081621|5|1)]	-
FBgn0051481	3R_2550621_SNP	A	T	0.1389	5	31	3.57e-05	0.241645	SiteClass[FBgn0051481|pb|INTRON|0],TranscriptAnnot[INTRON(MODIFIER||||777|pb|protein_coding|CODING|FBtr0089277|3|1);INTRON(MODIFIER||||772|pb|protein_coding|CODING|FBtr0089279|2|1);INTRON(MODIFIER||||782|pb|protein_coding|CODING|FBtr0089276|3|1);INTRON(MODIFIER||||777|pb|protein_coding|CODING|FBtr0089278|2|1)]	The gene proboscipedia is referred to in FlyBase by the symbol Dmel\pb (CG31481, FBgn0051481). It is a protein_coding_gene from Drosophila melanogaster. It has 4 annotated transcripts and 4 polypeptides (all unique). Gene sequence location is 3R:6707800..6742063. It has the cytological map location 84A5. Protein features are: Homeobox domain; Homeobox protein, antennapedia type, conserved site; H…
FBtr0089277	3R_2550621_SNP	A	T	0.1389	5	31	3.57e-05	0.241645	SiteClass[FBgn0051481|pb|INTRON|0],TranscriptAnnot[INTRON(MODIFIER||||777|pb|protein_coding|CODING|FBtr0089277|3|1);INTRON(MODIFIER||||772|pb|protein_coding|CODING|FBtr0089279|2|1);INTRON(MODIFIER||||782|pb|protein_coding|CODING|FBtr0089276|3|1);INTRON(MODIFIER||||777|pb|protein_coding|CODING|FBtr0089278|2|1)]	-
FBtr0089279	3R_2550621_SNP	A	T	0.1389	5	31	3.57e-05	0.241645	SiteClass[FBgn0051481|pb|INTRON|0],TranscriptAnnot[INTRON(MODIFIER||||777|pb|protein_coding|CODING|FBtr0089277|3|1);INTRON(MODIFIER||||772|pb|protein_coding|CODING|FBtr0089279|2|1);INTRON(MODIFIER||||782|pb|protein_coding|CODING|FBtr0089276|3|1);INTRON(MODIFIER||||777|pb|protein_coding|CODING|FBtr0089278|2|1)]	-
FBtr0089276	3R_2550621_SNP	A	T	0.1389	5	31	3.57e-05	0.241645	SiteClass[FBgn0051481|pb|INTRON|0],TranscriptAnnot[INTRON(MODIFIER||||777|pb|protein_coding|CODING|FBtr0089277|3|1);INTRON(MODIFIER||||772|pb|protein_coding|CODING|FBtr0089279|2|1);INTRON(MODIFIER||||782|pb|protein_coding|CODING|FBtr0089276|3|1);INTRON(MODIFIER||||777|pb|protein_coding|CODING|FBtr0089278|2|1)]	-
FBtr0089278	3R_2550621_SNP	A	T	0.1389	5	31	3.57e-05	0.241645	SiteClass[FBgn0051481|pb|INTRON|0],TranscriptAnnot[INTRON(MODIFIER||||777|pb|protein_coding|CODING|FBtr0089277|3|1);INTRON(MODIFIER||||772|pb|protein_coding|CODING|FBtr0089279|2|1);INTRON(MODIFIER||||782|pb|protein_coding|CODING|FBtr0089276|3|1);INTRON(MODIFIER||||777|pb|protein_coding|CODING|FBtr0089278|2|1)]	-
FBgn0003339	3R_2649413_INS	ACGAACTA	A	0.1176	4	30	3.58e-05	0.241645	SiteClass[FBgn0003339|Scr|UTR_3_PRIME|0;FBgn0011904|tRNA:K5:84ABa|UPSTREAM|657;FBgn0000003|7SLRNA:CR32864|DOWNSTREAM|896],TranscriptAnnot[UTR_3_PRIME(MODIFIER||1690||417|Scr|protein_coding|CODING|FBtr0081658|3|1);UTR_3_PRIME(MODIFIER||1690||417|Scr|protein_coding|CODING|FBtr0081657|3|1);UPSTREAM(MODIFIER||657|||tRNA:K5:84ABa|tRNA|NON_CODING|FBtr0081660||1);DOWNSTREAM(MODIFIER||896|||7SLRNA:CR3286…	The gene Sex combs reduced is referred to in FlyBase by the symbol Dmel\Scr (CG1030, FBgn0003339). It is a protein_coding_gene from Drosophila melanogaster. It has 2 annotated transcripts and 2 polypeptides (1 unique). Gene sequence location is 3R:6823120..6849981. It has the cytological map location 84A5. Protein features are: Homeobox domain; Homeobox protein, antennapedia type; Homeobox protei…
FBgn0011904	3R_2649413_INS	ACGAACTA	A	0.1176	4	30	3.58e-05	0.241645	SiteClass[FBgn0003339|Scr|UTR_3_PRIME|0;FBgn0011904|tRNA:K5:84ABa|UPSTREAM|657;FBgn0000003|7SLRNA:CR32864|DOWNSTREAM|896],TranscriptAnnot[UTR_3_PRIME(MODIFIER||1690||417|Scr|protein_coding|CODING|FBtr0081658|3|1);UTR_3_PRIME(MODIFIER||1690||417|Scr|protein_coding|CODING|FBtr0081657|3|1);UPSTREAM(MODIFIER||657|||tRNA:K5:84ABa|tRNA|NON_CODING|FBtr0081660||1);DOWNSTREAM(MODIFIER||896|||7SLRNA:CR3286…	The gene transfer RNA:lys5:84AB is referred to in FlyBase by the symbol Dmel\tRNA:K5:84ABa (CR31486, FBgn0011904). It is a tRNA_gene from Drosophila melanogaster. It has one annotated transcript. Gene sequence location is 3R:6822963..6823035. It has the cytological map location 84A5. Its molecular function is described by: triplet codon-amino acid adaptor activity; AAA codon-amino acid adaptor ac…
FBgn0000003	3R_2649413_INS	ACGAACTA	A	0.1176	4	30	3.58e-05	0.241645	SiteClass[FBgn0003339|Scr|UTR_3_PRIME|0;FBgn0011904|tRNA:K5:84ABa|UPSTREAM|657;FBgn0000003|7SLRNA:CR32864|DOWNSTREAM|896],TranscriptAnnot[UTR_3_PRIME(MODIFIER||1690||417|Scr|protein_coding|CODING|FBtr0081658|3|1);UTR_3_PRIME(MODIFIER||1690||417|Scr|protein_coding|CODING|FBtr0081657|3|1);UPSTREAM(MODIFIER||657|||tRNA:K5:84ABa|tRNA|NON_CODING|FBtr0081660||1);DOWNSTREAM(MODIFIER||896|||7SLRNA:CR3286…	The gene Signal recognition particle 7SL RNA CR32864 is referred to in FlyBase by the symbol Dmel\7SLRNA:CR32864 (CR32864, FBgn0000003). It is a non_protein_coding_gene from Drosophila melanogaster. It has one annotated transcript. Gene sequence location is 3R:6822498..6822796. It has the cytological map location 84A5. Its molecular function is unknown. It is involved in the biological process de…
FBtr0081658	3R_2649413_INS	ACGAACTA	A	0.1176	4	30	3.58e-05	0.241645	SiteClass[FBgn0003339|Scr|UTR_3_PRIME|0;FBgn0011904|tRNA:K5:84ABa|UPSTREAM|657;FBgn0000003|7SLRNA:CR32864|DOWNSTREAM|896],TranscriptAnnot[UTR_3_PRIME(MODIFIER||1690||417|Scr|protein_coding|CODING|FBtr0081658|3|1);UTR_3_PRIME(MODIFIER||1690||417|Scr|protein_coding|CODING|FBtr0081657|3|1);UPSTREAM(MODIFIER||657|||tRNA:K5:84ABa|tRNA|NON_CODING|FBtr0081660||1);DOWNSTREAM(MODIFIER||896|||7SLRNA:CR3286…	-
FBtr0081657	3R_2649413_INS	ACGAACTA	A	0.1176	4	30	3.58e-05	0.241645	SiteClass[FBgn0003339|Scr|UTR_3_PRIME|0;FBgn0011904|tRNA:K5:84ABa|UPSTREAM|657;FBgn0000003|7SLRNA:CR32864|DOWNSTREAM|896],TranscriptAnnot[UTR_3_PRIME(MODIFIER||1690||417|Scr|protein_coding|CODING|FBtr0081658|3|1);UTR_3_PRIME(MODIFIER||1690||417|Scr|protein_coding|CODING|FBtr0081657|3|1);UPSTREAM(MODIFIER||657|||tRNA:K5:84ABa|tRNA|NON_CODING|FBtr0081660||1);DOWNSTREAM(MODIFIER||896|||7SLRNA:CR3286…	-
FBtr0081660	3R_2649413_INS	ACGAACTA	A	0.1176	4	30	3.58e-05	0.241645	SiteClass[FBgn0003339|Scr|UTR_3_PRIME|0;FBgn0011904|tRNA:K5:84ABa|UPSTREAM|657;FBgn0000003|7SLRNA:CR32864|DOWNSTREAM|896],TranscriptAnnot[UTR_3_PRIME(MODIFIER||1690||417|Scr|protein_coding|CODING|FBtr0081658|3|1);UTR_3_PRIME(MODIFIER||1690||417|Scr|protein_coding|CODING|FBtr0081657|3|1);UPSTREAM(MODIFIER||657|||tRNA:K5:84ABa|tRNA|NON_CODING|FBtr0081660||1);DOWNSTREAM(MODIFIER||896|||7SLRNA:CR3286…	-
FBtr0081624	3R_2649413_INS	ACGAACTA	A	0.1176	4	30	3.58e-05	0.241645	SiteClass[FBgn0003339|Scr|UTR_3_PRIME|0;FBgn0011904|tRNA:K5:84ABa|UPSTREAM|657;FBgn0000003|7SLRNA:CR32864|DOWNSTREAM|896],TranscriptAnnot[UTR_3_PRIME(MODIFIER||1690||417|Scr|protein_coding|CODING|FBtr0081658|3|1);UTR_3_PRIME(MODIFIER||1690||417|Scr|protein_coding|CODING|FBtr0081657|3|1);UPSTREAM(MODIFIER||657|||tRNA:K5:84ABa|tRNA|NON_CODING|FBtr0081660||1);DOWNSTREAM(MODIFIER||896|||7SLRNA:CR3286…	-
FBgn0037412	3R_2046818_SNP	T	G	0.1429	5	30	3.54e-05	0.241645	SiteClass[FBgn0037412|Osi4|INTRON|0],TranscriptAnnot[INTRON(MODIFIER||||393|Osi4|protein_coding|CODING|FBtr0078615|1|1);INTRON(MODIFIER||||395|Osi4|protein_coding|CODING|FBtr0334866|1|1)]	The gene Osiris 4 is referred to in FlyBase by the symbol Dmel\Osi4 (CG10303, FBgn0037412). It is a protein_coding_gene from Drosophila melanogaster. It has 2 annotated transcripts and 2 polypeptides (all unique). Gene sequence location is 3R:6218318..6221781. It has the cytological map location 83E1. Protein features are: Protein of unknown function DUF1676. Its molecular function is described b…
FBtr0078615	3R_2046818_SNP	T	G	0.1429	5	30	3.54e-05	0.241645	SiteClass[FBgn0037412|Osi4|INTRON|0],TranscriptAnnot[INTRON(MODIFIER||||393|Osi4|protein_coding|CODING|FBtr0078615|1|1);INTRON(MODIFIER||||395|Osi4|protein_coding|CODING|FBtr0334866|1|1)]	-
FBtr0334866	3R_2046818_SNP	T	G	0.1429	5	30	3.54e-05	0.241645	SiteClass[FBgn0037412|Osi4|INTRON|0],TranscriptAnnot[INTRON(MODIFIER||||393|Osi4|protein_coding|CODING|FBtr0078615|1|1);INTRON(MODIFIER||||395|Osi4|protein_coding|CODING|FBtr0334866|1|1)]	-
FBgn0051935	2L_1609758_SNP	T	A	0.1081	4	33	3.61e-05	0.241645	SiteClass[FBgn0051935|CG31935|NON_SYNONYMOUS_CODING|0],TranscriptAnnot[NON_SYNONYMOUS_CODING(MODERATE|MISSENSE|gaT/gaA|D438E|916|CG31935|protein_coding|CODING|FBtr0077916|1|1)]	This gene is referred to in FlyBase by the symbol Dmel\CG31935 (FBgn0051935). It is a protein_coding_gene from Drosophila melanogaster. It has one annotated transcript and one polypeptide. Gene sequence location is 2L:1594822..1611157. It has the cytological map location 22A3. Protein features are: Rab3 GTPase-activating protein catalytic subunit. Its molecular function is described by: GTPase ac…
FBtr0077916	2L_1609758_SNP	T	A	0.1081	4	33	3.61e-05	0.241645	SiteClass[FBgn0051935|CG31935|NON_SYNONYMOUS_CODING|0],TranscriptAnnot[NON_SYNONYMOUS_CODING(MODERATE|MISSENSE|gaT/gaA|D438E|916|CG31935|protein_coding|CODING|FBtr0077916|1|1)]	-
FBgn0052103	3L_12398219_SNP	A	G	0.1081	4	33	3.73e-05	0.241645	SiteClass[FBgn0052103|CG32103|SYNONYMOUS_CODING|0],TranscriptAnnot[SYNONYMOUS_CODING(LOW|SILENT|ttC/ttT|F55|363|CG32103|protein_coding|CODING|FBtr0075983|2|1);SYNONYMOUS_CODING(LOW|SILENT|ttC/ttT|F42|350|CG32103|protein_coding|CODING|FBtr0332089|2|1);SYNONYMOUS_CODING(LOW|SILENT|ttC/ttT|F275|583|CG32103|protein_coding|CODING|FBtr0075982|6|1);SYNONYMOUS_CODING(LOW|SILENT|ttC/ttT|F275|583|CG32103|p…	This gene is referred to in FlyBase by the symbol Dmel\CG32103 (FBgn0052103). It is a protein_coding_gene from Drosophila melanogaster. It has 4 annotated transcripts and 4 polypeptides (3 unique). Gene sequence location is 3L:12402295..12414842. It has the cytological map location 69B4-69B5. Protein features are: EF-Hand 1, calcium-binding site; EF-hand domain; EF-hand domain pair; Graves diseas…
FBtr0075983	3L_12398219_SNP	A	G	0.1081	4	33	3.73e-05	0.241645	SiteClass[FBgn0052103|CG32103|SYNONYMOUS_CODING|0],TranscriptAnnot[SYNONYMOUS_CODING(LOW|SILENT|ttC/ttT|F55|363|CG32103|protein_coding|CODING|FBtr0075983|2|1);SYNONYMOUS_CODING(LOW|SILENT|ttC/ttT|F42|350|CG32103|protein_coding|CODING|FBtr0332089|2|1);SYNONYMOUS_CODING(LOW|SILENT|ttC/ttT|F275|583|CG32103|protein_coding|CODING|FBtr0075982|6|1);SYNONYMOUS_CODING(LOW|SILENT|ttC/ttT|F275|583|CG32103|p…	-
FBtr0332089	3L_12398219_SNP	A	G	0.1081	4	33	3.73e-05	0.241645	SiteClass[FBgn0052103|CG32103|SYNONYMOUS_CODING|0],TranscriptAnnot[SYNONYMOUS_CODING(LOW|SILENT|ttC/ttT|F55|363|CG32103|protein_coding|CODING|FBtr0075983|2|1);SYNONYMOUS_CODING(LOW|SILENT|ttC/ttT|F42|350|CG32103|protein_coding|CODING|FBtr0332089|2|1);SYNONYMOUS_CODING(LOW|SILENT|ttC/ttT|F275|583|CG32103|protein_coding|CODING|FBtr0075982|6|1);SYNONYMOUS_CODING(LOW|SILENT|ttC/ttT|F275|583|CG32103|p…	-
FBtr0075982	3L_12398219_SNP	A	G	0.1081	4	33	3.73e-05	0.241645	SiteClass[FBgn0052103|CG32103|SYNONYMOUS_CODING|0],TranscriptAnnot[SYNONYMOUS_CODING(LOW|SILENT|ttC/ttT|F55|363|CG32103|protein_coding|CODING|FBtr0075983|2|1);SYNONYMOUS_CODING(LOW|SILENT|ttC/ttT|F42|350|CG32103|protein_coding|CODING|FBtr0332089|2|1);SYNONYMOUS_CODING(LOW|SILENT|ttC/ttT|F275|583|CG32103|protein_coding|CODING|FBtr0075982|6|1);SYNONYMOUS_CODING(LOW|SILENT|ttC/ttT|F275|583|CG32103|p…	-
FBtr0332090	3L_12398219_SNP	A	G	0.1081	4	33	3.73e-05	0.241645	SiteClass[FBgn0052103|CG32103|SYNONYMOUS_CODING|0],TranscriptAnnot[SYNONYMOUS_CODING(LOW|SILENT|ttC/ttT|F55|363|CG32103|protein_coding|CODING|FBtr0075983|2|1);SYNONYMOUS_CODING(LOW|SILENT|ttC/ttT|F42|350|CG32103|protein_coding|CODING|FBtr0332089|2|1);SYNONYMOUS_CODING(LOW|SILENT|ttC/ttT|F275|583|CG32103|protein_coding|CODING|FBtr0075982|6|1);SYNONYMOUS_CODING(LOW|SILENT|ttC/ttT|F275|583|CG32103|p…	-
FBgn0030484	X_13299865_SNP	C	T	0.1081	4	33	3.78e-05	0.241645	SiteClass[FBgn0030484|GstT4|INTRON|0],TranscriptAnnot[INTRON(MODIFIER||||237|GstT4|protein_coding|CODING|FBtr0073778|1|1)]	The gene Glutathione S transferase T4 is referred to in FlyBase by the symbol Dmel\GstT4 (CG1681, FBgn0030484). It is a protein_coding_gene from Drosophila melanogaster. It has one annotated transcript and one polypeptide. Gene sequence location is X:13404749..13409323. It has the cytological map location 11F4. Protein features are: Glutathione S-transferase, C-terminal; Glutathione S-transferase…
FBtr0073778	X_13299865_SNP	C	T	0.1081	4	33	3.78e-05	0.241645	SiteClass[FBgn0030484|GstT4|INTRON|0],TranscriptAnnot[INTRON(MODIFIER||||237|GstT4|protein_coding|CODING|FBtr0073778|1|1)]	-
FBgn0030484	X_13299866_SNP	A	G	0.1081	4	33	3.78e-05	0.241645	SiteClass[FBgn0030484|GstT4|INTRON|0],TranscriptAnnot[INTRON(MODIFIER||||237|GstT4|protein_coding|CODING|FBtr0073778|1|1)]	The gene Glutathione S transferase T4 is referred to in FlyBase by the symbol Dmel\GstT4 (CG1681, FBgn0030484). It is a protein_coding_gene from Drosophila melanogaster. It has one annotated transcript and one polypeptide. Gene sequence location is X:13404749..13409323. It has the cytological map location 11F4. Protein features are: Glutathione S-transferase, C-terminal; Glutathione S-transferase…
FBtr0073778	X_13299866_SNP	A	G	0.1081	4	33	3.78e-05	0.241645	SiteClass[FBgn0030484|GstT4|INTRON|0],TranscriptAnnot[INTRON(MODIFIER||||237|GstT4|protein_coding|CODING|FBtr0073778|1|1)]	-
FBgn0037702	3R_5351146_SNP	C	G	0.1081	4	33	3.73e-05	0.241645	SiteClass[FBgn0037702|CG8176|SYNONYMOUS_CODING|0],TranscriptAnnot[SYNONYMOUS_CODING(LOW|SILENT|acG/acC|T890|1220|CG8176|protein_coding|CODING|FBtr0113207|10|1);SYNONYMOUS_CODING(LOW|SILENT|acG/acC|T803|1133|CG8176|protein_coding|CODING|FBtr0082065|9|1);SYNONYMOUS_CODING(LOW|SILENT|acG/acC|T831|1161|CG8176|protein_coding|CODING|FBtr0334652|10|1);SYNONYMOUS_CODING(LOW|SILENT|acG/acC|T890|1220|CG817…	This gene is referred to in FlyBase by the symbol Dmel\CG8176 (FBgn0037702). It is a protein_coding_gene from Drosophila melanogaster. It has 5 annotated transcripts and 5 polypeptides (3 unique). Gene sequence location is 3R:9516007..9527237. It has the cytological map location 85D19. Protein features are: F-BAR domain; FCH domain; Mu homology domain; Muniscin C-terminal. Its molecular function …
FBtr0113207	3R_5351146_SNP	C	G	0.1081	4	33	3.73e-05	0.241645	SiteClass[FBgn0037702|CG8176|SYNONYMOUS_CODING|0],TranscriptAnnot[SYNONYMOUS_CODING(LOW|SILENT|acG/acC|T890|1220|CG8176|protein_coding|CODING|FBtr0113207|10|1);SYNONYMOUS_CODING(LOW|SILENT|acG/acC|T803|1133|CG8176|protein_coding|CODING|FBtr0082065|9|1);SYNONYMOUS_CODING(LOW|SILENT|acG/acC|T831|1161|CG8176|protein_coding|CODING|FBtr0334652|10|1);SYNONYMOUS_CODING(LOW|SILENT|acG/acC|T890|1220|CG817…	-
FBtr0082065	3R_5351146_SNP	C	G	0.1081	4	33	3.73e-05	0.241645	SiteClass[FBgn0037702|CG8176|SYNONYMOUS_CODING|0],TranscriptAnnot[SYNONYMOUS_CODING(LOW|SILENT|acG/acC|T890|1220|CG8176|protein_coding|CODING|FBtr0113207|10|1);SYNONYMOUS_CODING(LOW|SILENT|acG/acC|T803|1133|CG8176|protein_coding|CODING|FBtr0082065|9|1);SYNONYMOUS_CODING(LOW|SILENT|acG/acC|T831|1161|CG8176|protein_coding|CODING|FBtr0334652|10|1);SYNONYMOUS_CODING(LOW|SILENT|acG/acC|T890|1220|CG817…	-
FBtr0334652	3R_5351146_SNP	C	G	0.1081	4	33	3.73e-05	0.241645	SiteClass[FBgn0037702|CG8176|SYNONYMOUS_CODING|0],TranscriptAnnot[SYNONYMOUS_CODING(LOW|SILENT|acG/acC|T890|1220|CG8176|protein_coding|CODING|FBtr0113207|10|1);SYNONYMOUS_CODING(LOW|SILENT|acG/acC|T803|1133|CG8176|protein_coding|CODING|FBtr0082065|9|1);SYNONYMOUS_CODING(LOW|SILENT|acG/acC|T831|1161|CG8176|protein_coding|CODING|FBtr0334652|10|1);SYNONYMOUS_CODING(LOW|SILENT|acG/acC|T890|1220|CG817…	-
FBtr0334651	3R_5351146_SNP	C	G	0.1081	4	33	3.73e-05	0.241645	SiteClass[FBgn0037702|CG8176|SYNONYMOUS_CODING|0],TranscriptAnnot[SYNONYMOUS_CODING(LOW|SILENT|acG/acC|T890|1220|CG8176|protein_coding|CODING|FBtr0113207|10|1);SYNONYMOUS_CODING(LOW|SILENT|acG/acC|T803|1133|CG8176|protein_coding|CODING|FBtr0082065|9|1);SYNONYMOUS_CODING(LOW|SILENT|acG/acC|T831|1161|CG8176|protein_coding|CODING|FBtr0334652|10|1);SYNONYMOUS_CODING(LOW|SILENT|acG/acC|T890|1220|CG817…	-
FBtr0334650	3R_5351146_SNP	C	G	0.1081	4	33	3.73e-05	0.241645	SiteClass[FBgn0037702|CG8176|SYNONYMOUS_CODING|0],TranscriptAnnot[SYNONYMOUS_CODING(LOW|SILENT|acG/acC|T890|1220|CG8176|protein_coding|CODING|FBtr0113207|10|1);SYNONYMOUS_CODING(LOW|SILENT|acG/acC|T803|1133|CG8176|protein_coding|CODING|FBtr0082065|9|1);SYNONYMOUS_CODING(LOW|SILENT|acG/acC|T831|1161|CG8176|protein_coding|CODING|FBtr0334652|10|1);SYNONYMOUS_CODING(LOW|SILENT|acG/acC|T890|1220|CG817…	-
FBgn0002466	3L_12507113_SNP	G	C	0.1081	4	33	3.67e-05	0.241645	SiteClass[FBgn0002466|sti|SYNONYMOUS_CODING|0;FBgn0266678|CR45168|DOWNSTREAM|592],TranscriptAnnot[SYNONYMOUS_CODING(LOW|SILENT|cgG/cgC|R133|1854|sti|protein_coding|CODING|FBtr0075970|2|1);SYNONYMOUS_CODING(LOW|SILENT|cgG/cgC|R133|1858|sti|protein_coding|CODING|FBtr0332643|2|1);DOWNSTREAM(MODIFIER||592|||CR45168|ncRNA|NON_CODING|FBtr0345043||1)]	The gene sticky is referred to in FlyBase by the symbol Dmel\sti (CG10522, FBgn0002466). It is a protein_coding_gene from Drosophila melanogaster. It has 2 annotated transcripts and 2 polypeptides (all unique). Gene sequence location is 3L:12507998..12514815. It has the cytological map location 69C4. Protein features are: AGC-kinase, C-terminal; Citron homology (CNH) domain; PH domain-like; Prote…
FBgn0266678	3L_12507113_SNP	G	C	0.1081	4	33	3.67e-05	0.241645	SiteClass[FBgn0002466|sti|SYNONYMOUS_CODING|0;FBgn0266678|CR45168|DOWNSTREAM|592],TranscriptAnnot[SYNONYMOUS_CODING(LOW|SILENT|cgG/cgC|R133|1854|sti|protein_coding|CODING|FBtr0075970|2|1);SYNONYMOUS_CODING(LOW|SILENT|cgG/cgC|R133|1858|sti|protein_coding|CODING|FBtr0332643|2|1);DOWNSTREAM(MODIFIER||592|||CR45168|ncRNA|NON_CODING|FBtr0345043||1)]	This gene is referred to in FlyBase by the symbol Dmel\CR45168 (FBgn0266678). It is a non_protein_coding_gene from Drosophila melanogaster. It has one annotated transcript. Gene sequence location is 3L:12514605..12515009. It has the cytological map location 69C4. Its molecular function is unknown. The biological processes in which it is involved are not known. No alleles are reported.
FBtr0075970	3L_12507113_SNP	G	C	0.1081	4	33	3.67e-05	0.241645	SiteClass[FBgn0002466|sti|SYNONYMOUS_CODING|0;FBgn0266678|CR45168|DOWNSTREAM|592],TranscriptAnnot[SYNONYMOUS_CODING(LOW|SILENT|cgG/cgC|R133|1854|sti|protein_coding|CODING|FBtr0075970|2|1);SYNONYMOUS_CODING(LOW|SILENT|cgG/cgC|R133|1858|sti|protein_coding|CODING|FBtr0332643|2|1);DOWNSTREAM(MODIFIER||592|||CR45168|ncRNA|NON_CODING|FBtr0345043||1)]	-
FBtr0332643	3L_12507113_SNP	G	C	0.1081	4	33	3.67e-05	0.241645	SiteClass[FBgn0002466|sti|SYNONYMOUS_CODING|0;FBgn0266678|CR45168|DOWNSTREAM|592],TranscriptAnnot[SYNONYMOUS_CODING(LOW|SILENT|cgG/cgC|R133|1854|sti|protein_coding|CODING|FBtr0075970|2|1);SYNONYMOUS_CODING(LOW|SILENT|cgG/cgC|R133|1858|sti|protein_coding|CODING|FBtr0332643|2|1);DOWNSTREAM(MODIFIER||592|||CR45168|ncRNA|NON_CODING|FBtr0345043||1)]	-
FBtr0345043	3L_12507113_SNP	G	C	0.1081	4	33	3.67e-05	0.241645	SiteClass[FBgn0002466|sti|SYNONYMOUS_CODING|0;FBgn0266678|CR45168|DOWNSTREAM|592],TranscriptAnnot[SYNONYMOUS_CODING(LOW|SILENT|cgG/cgC|R133|1854|sti|protein_coding|CODING|FBtr0075970|2|1);SYNONYMOUS_CODING(LOW|SILENT|cgG/cgC|R133|1858|sti|protein_coding|CODING|FBtr0332643|2|1);DOWNSTREAM(MODIFIER||592|||CR45168|ncRNA|NON_CODING|FBtr0345043||1)]	-
FBgn0002466	3L_12507315_SNP	G	A	0.1081	4	33	3.67e-05	0.241645	SiteClass[FBgn0002466|sti|INTRON|0;FBgn0266678|CR45168|DOWNSTREAM|390;FBgn0041775|tral|UPSTREAM|844],TranscriptAnnot[UPSTREAM(MODIFIER||844||652|tral|protein_coding|CODING|FBtr0075959||1);UPSTREAM(MODIFIER||844||652|tral|protein_coding|CODING|FBtr0332635||1);UPSTREAM(MODIFIER||844||656|tral|protein_coding|CODING|FBtr0332636||1);UPSTREAM(MODIFIER||844||646|tral|protein_coding|CODING|FBtr0332637||1…	The gene sticky is referred to in FlyBase by the symbol Dmel\sti (CG10522, FBgn0002466). It is a protein_coding_gene from Drosophila melanogaster. It has 2 annotated transcripts and 2 polypeptides (all unique). Gene sequence location is 3L:12507998..12514815. It has the cytological map location 69C4. Protein features are: AGC-kinase, C-terminal; Citron homology (CNH) domain; PH domain-like; Prote…
FBgn0266678	3L_12507315_SNP	G	A	0.1081	4	33	3.67e-05	0.241645	SiteClass[FBgn0002466|sti|INTRON|0;FBgn0266678|CR45168|DOWNSTREAM|390;FBgn0041775|tral|UPSTREAM|844],TranscriptAnnot[UPSTREAM(MODIFIER||844||652|tral|protein_coding|CODING|FBtr0075959||1);UPSTREAM(MODIFIER||844||652|tral|protein_coding|CODING|FBtr0332635||1);UPSTREAM(MODIFIER||844||656|tral|protein_coding|CODING|FBtr0332636||1);UPSTREAM(MODIFIER||844||646|tral|protein_coding|CODING|FBtr0332637||1…	This gene is referred to in FlyBase by the symbol Dmel\CR45168 (FBgn0266678). It is a non_protein_coding_gene from Drosophila melanogaster. It has one annotated transcript. Gene sequence location is 3L:12514605..12515009. It has the cytological map location 69C4. Its molecular function is unknown. The biological processes in which it is involved are not known. No alleles are reported.
FBgn0041775	3L_12507315_SNP	G	A	0.1081	4	33	3.67e-05	0.241645	SiteClass[FBgn0002466|sti|INTRON|0;FBgn0266678|CR45168|DOWNSTREAM|390;FBgn0041775|tral|UPSTREAM|844],TranscriptAnnot[UPSTREAM(MODIFIER||844||652|tral|protein_coding|CODING|FBtr0075959||1);UPSTREAM(MODIFIER||844||652|tral|protein_coding|CODING|FBtr0332635||1);UPSTREAM(MODIFIER||844||656|tral|protein_coding|CODING|FBtr0332636||1);UPSTREAM(MODIFIER||844||646|tral|protein_coding|CODING|FBtr0332637||1…	The gene trailer hitch is referred to in FlyBase by the symbol Dmel\tral (CG10686, FBgn0041775). It is a protein_coding_gene from Drosophila melanogaster. It has 9 annotated transcripts and 9 polypeptides (8 unique). Gene sequence location is 3L:12515059..12520954. It has the cytological map location 69C4. Protein features are: DFDF domain; FDF domain; FFD box; LSM domain; Lsm14 N-terminal; TFG b…
FBtr0075959	3L_12507315_SNP	G	A	0.1081	4	33	3.67e-05	0.241645	SiteClass[FBgn0002466|sti|INTRON|0;FBgn0266678|CR45168|DOWNSTREAM|390;FBgn0041775|tral|UPSTREAM|844],TranscriptAnnot[UPSTREAM(MODIFIER||844||652|tral|protein_coding|CODING|FBtr0075959||1);UPSTREAM(MODIFIER||844||652|tral|protein_coding|CODING|FBtr0332635||1);UPSTREAM(MODIFIER||844||656|tral|protein_coding|CODING|FBtr0332636||1);UPSTREAM(MODIFIER||844||646|tral|protein_coding|CODING|FBtr0332637||1…	-
FBtr0332635	3L_12507315_SNP	G	A	0.1081	4	33	3.67e-05	0.241645	SiteClass[FBgn0002466|sti|INTRON|0;FBgn0266678|CR45168|DOWNSTREAM|390;FBgn0041775|tral|UPSTREAM|844],TranscriptAnnot[UPSTREAM(MODIFIER||844||652|tral|protein_coding|CODING|FBtr0075959||1);UPSTREAM(MODIFIER||844||652|tral|protein_coding|CODING|FBtr0332635||1);UPSTREAM(MODIFIER||844||656|tral|protein_coding|CODING|FBtr0332636||1);UPSTREAM(MODIFIER||844||646|tral|protein_coding|CODING|FBtr0332637||1…	-
FBtr0332636	3L_12507315_SNP	G	A	0.1081	4	33	3.67e-05	0.241645	SiteClass[FBgn0002466|sti|INTRON|0;FBgn0266678|CR45168|DOWNSTREAM|390;FBgn0041775|tral|UPSTREAM|844],TranscriptAnnot[UPSTREAM(MODIFIER||844||652|tral|protein_coding|CODING|FBtr0075959||1);UPSTREAM(MODIFIER||844||652|tral|protein_coding|CODING|FBtr0332635||1);UPSTREAM(MODIFIER||844||656|tral|protein_coding|CODING|FBtr0332636||1);UPSTREAM(MODIFIER||844||646|tral|protein_coding|CODING|FBtr0332637||1…	-
FBtr0332637	3L_12507315_SNP	G	A	0.1081	4	33	3.67e-05	0.241645	SiteClass[FBgn0002466|sti|INTRON|0;FBgn0266678|CR45168|DOWNSTREAM|390;FBgn0041775|tral|UPSTREAM|844],TranscriptAnnot[UPSTREAM(MODIFIER||844||652|tral|protein_coding|CODING|FBtr0075959||1);UPSTREAM(MODIFIER||844||652|tral|protein_coding|CODING|FBtr0332635||1);UPSTREAM(MODIFIER||844||656|tral|protein_coding|CODING|FBtr0332636||1);UPSTREAM(MODIFIER||844||646|tral|protein_coding|CODING|FBtr0332637||1…	-
FBtr0332638	3L_12507315_SNP	G	A	0.1081	4	33	3.67e-05	0.241645	SiteClass[FBgn0002466|sti|INTRON|0;FBgn0266678|CR45168|DOWNSTREAM|390;FBgn0041775|tral|UPSTREAM|844],TranscriptAnnot[UPSTREAM(MODIFIER||844||652|tral|protein_coding|CODING|FBtr0075959||1);UPSTREAM(MODIFIER||844||652|tral|protein_coding|CODING|FBtr0332635||1);UPSTREAM(MODIFIER||844||656|tral|protein_coding|CODING|FBtr0332636||1);UPSTREAM(MODIFIER||844||646|tral|protein_coding|CODING|FBtr0332637||1…	-
FBtr0332639	3L_12507315_SNP	G	A	0.1081	4	33	3.67e-05	0.241645	SiteClass[FBgn0002466|sti|INTRON|0;FBgn0266678|CR45168|DOWNSTREAM|390;FBgn0041775|tral|UPSTREAM|844],TranscriptAnnot[UPSTREAM(MODIFIER||844||652|tral|protein_coding|CODING|FBtr0075959||1);UPSTREAM(MODIFIER||844||652|tral|protein_coding|CODING|FBtr0332635||1);UPSTREAM(MODIFIER||844||656|tral|protein_coding|CODING|FBtr0332636||1);UPSTREAM(MODIFIER||844||646|tral|protein_coding|CODING|FBtr0332637||1…	-
FBtr0332640	3L_12507315_SNP	G	A	0.1081	4	33	3.67e-05	0.241645	SiteClass[FBgn0002466|sti|INTRON|0;FBgn0266678|CR45168|DOWNSTREAM|390;FBgn0041775|tral|UPSTREAM|844],TranscriptAnnot[UPSTREAM(MODIFIER||844||652|tral|protein_coding|CODING|FBtr0075959||1);UPSTREAM(MODIFIER||844||652|tral|protein_coding|CODING|FBtr0332635||1);UPSTREAM(MODIFIER||844||656|tral|protein_coding|CODING|FBtr0332636||1);UPSTREAM(MODIFIER||844||646|tral|protein_coding|CODING|FBtr0332637||1…	-
FBtr0332641	3L_12507315_SNP	G	A	0.1081	4	33	3.67e-05	0.241645	SiteClass[FBgn0002466|sti|INTRON|0;FBgn0266678|CR45168|DOWNSTREAM|390;FBgn0041775|tral|UPSTREAM|844],TranscriptAnnot[UPSTREAM(MODIFIER||844||652|tral|protein_coding|CODING|FBtr0075959||1);UPSTREAM(MODIFIER||844||652|tral|protein_coding|CODING|FBtr0332635||1);UPSTREAM(MODIFIER||844||656|tral|protein_coding|CODING|FBtr0332636||1);UPSTREAM(MODIFIER||844||646|tral|protein_coding|CODING|FBtr0332637||1…	-
FBtr0332642	3L_12507315_SNP	G	A	0.1081	4	33	3.67e-05	0.241645	SiteClass[FBgn0002466|sti|INTRON|0;FBgn0266678|CR45168|DOWNSTREAM|390;FBgn0041775|tral|UPSTREAM|844],TranscriptAnnot[UPSTREAM(MODIFIER||844||652|tral|protein_coding|CODING|FBtr0075959||1);UPSTREAM(MODIFIER||844||652|tral|protein_coding|CODING|FBtr0332635||1);UPSTREAM(MODIFIER||844||656|tral|protein_coding|CODING|FBtr0332636||1);UPSTREAM(MODIFIER||844||646|tral|protein_coding|CODING|FBtr0332637||1…	-
FBtr0345043	3L_12507315_SNP	G	A	0.1081	4	33	3.67e-05	0.241645	SiteClass[FBgn0002466|sti|INTRON|0;FBgn0266678|CR45168|DOWNSTREAM|390;FBgn0041775|tral|UPSTREAM|844],TranscriptAnnot[UPSTREAM(MODIFIER||844||652|tral|protein_coding|CODING|FBtr0075959||1);UPSTREAM(MODIFIER||844||652|tral|protein_coding|CODING|FBtr0332635||1);UPSTREAM(MODIFIER||844||656|tral|protein_coding|CODING|FBtr0332636||1);UPSTREAM(MODIFIER||844||646|tral|protein_coding|CODING|FBtr0332637||1…	-
FBtr0075970	3L_12507315_SNP	G	A	0.1081	4	33	3.67e-05	0.241645	SiteClass[FBgn0002466|sti|INTRON|0;FBgn0266678|CR45168|DOWNSTREAM|390;FBgn0041775|tral|UPSTREAM|844],TranscriptAnnot[UPSTREAM(MODIFIER||844||652|tral|protein_coding|CODING|FBtr0075959||1);UPSTREAM(MODIFIER||844||652|tral|protein_coding|CODING|FBtr0332635||1);UPSTREAM(MODIFIER||844||656|tral|protein_coding|CODING|FBtr0332636||1);UPSTREAM(MODIFIER||844||646|tral|protein_coding|CODING|FBtr0332637||1…	-
FBtr0332643	3L_12507315_SNP	G	A	0.1081	4	33	3.67e-05	0.241645	SiteClass[FBgn0002466|sti|INTRON|0;FBgn0266678|CR45168|DOWNSTREAM|390;FBgn0041775|tral|UPSTREAM|844],TranscriptAnnot[UPSTREAM(MODIFIER||844||652|tral|protein_coding|CODING|FBtr0075959||1);UPSTREAM(MODIFIER||844||652|tral|protein_coding|CODING|FBtr0332635||1);UPSTREAM(MODIFIER||844||656|tral|protein_coding|CODING|FBtr0332636||1);UPSTREAM(MODIFIER||844||646|tral|protein_coding|CODING|FBtr0332637||1…	-
FBgn0002466	3L_12507316_SNP	G	T	0.1081	4	33	3.67e-05	0.241645	SiteClass[FBgn0002466|sti|INTRON|0;FBgn0266678|CR45168|DOWNSTREAM|389;FBgn0041775|tral|UPSTREAM|843],TranscriptAnnot[UPSTREAM(MODIFIER||843||652|tral|protein_coding|CODING|FBtr0075959||1);UPSTREAM(MODIFIER||843||652|tral|protein_coding|CODING|FBtr0332635||1);UPSTREAM(MODIFIER||843||656|tral|protein_coding|CODING|FBtr0332636||1);UPSTREAM(MODIFIER||843||646|tral|protein_coding|CODING|FBtr0332637||1…	The gene sticky is referred to in FlyBase by the symbol Dmel\sti (CG10522, FBgn0002466). It is a protein_coding_gene from Drosophila melanogaster. It has 2 annotated transcripts and 2 polypeptides (all unique). Gene sequence location is 3L:12507998..12514815. It has the cytological map location 69C4. Protein features are: AGC-kinase, C-terminal; Citron homology (CNH) domain; PH domain-like; Prote…
FBgn0266678	3L_12507316_SNP	G	T	0.1081	4	33	3.67e-05	0.241645	SiteClass[FBgn0002466|sti|INTRON|0;FBgn0266678|CR45168|DOWNSTREAM|389;FBgn0041775|tral|UPSTREAM|843],TranscriptAnnot[UPSTREAM(MODIFIER||843||652|tral|protein_coding|CODING|FBtr0075959||1);UPSTREAM(MODIFIER||843||652|tral|protein_coding|CODING|FBtr0332635||1);UPSTREAM(MODIFIER||843||656|tral|protein_coding|CODING|FBtr0332636||1);UPSTREAM(MODIFIER||843||646|tral|protein_coding|CODING|FBtr0332637||1…	This gene is referred to in FlyBase by the symbol Dmel\CR45168 (FBgn0266678). It is a non_protein_coding_gene from Drosophila melanogaster. It has one annotated transcript. Gene sequence location is 3L:12514605..12515009. It has the cytological map location 69C4. Its molecular function is unknown. The biological processes in which it is involved are not known. No alleles are reported.
FBgn0041775	3L_12507316_SNP	G	T	0.1081	4	33	3.67e-05	0.241645	SiteClass[FBgn0002466|sti|INTRON|0;FBgn0266678|CR45168|DOWNSTREAM|389;FBgn0041775|tral|UPSTREAM|843],TranscriptAnnot[UPSTREAM(MODIFIER||843||652|tral|protein_coding|CODING|FBtr0075959||1);UPSTREAM(MODIFIER||843||652|tral|protein_coding|CODING|FBtr0332635||1);UPSTREAM(MODIFIER||843||656|tral|protein_coding|CODING|FBtr0332636||1);UPSTREAM(MODIFIER||843||646|tral|protein_coding|CODING|FBtr0332637||1…	The gene trailer hitch is referred to in FlyBase by the symbol Dmel\tral (CG10686, FBgn0041775). It is a protein_coding_gene from Drosophila melanogaster. It has 9 annotated transcripts and 9 polypeptides (8 unique). Gene sequence location is 3L:12515059..12520954. It has the cytological map location 69C4. Protein features are: DFDF domain; FDF domain; FFD box; LSM domain; Lsm14 N-terminal; TFG b…
[truncated: 11,895 more rows]
