# Supplementary material for: α-amanitin resistance in Drosophila melanogaster: A genome-wide association approach
Source: PLoS One. 2017 Feb 27;12(2):e0173162. doi: 10.1371/journal.pone.0173162 (PMC5328632; doi:10.1371/journal.pone.0173162)
Supplement: S6 Table — A cutoff single mixed p-value of 1.00E-03 was used. (XLSX) [file pone.0173162.s006.xlsx]

## Sheet: Table_S3_FDR
								Benjamini & Hochberg False Discovery Rate
Gene_ID	SNP_ID	MinorAllele	MajorAllele	MinorAlleleFrequency	MinorAlleleCount	MajorAlleleCount	SingleMixedPval	180-line GWAS on 2.0 ug/g p-value FDR (BH)	SiteClass	GeneDescription
FBgn0261260	X_9293649_SNP	C	T	0.0618	11	167	4.26e-09	0.00733855	SiteClass[FBgn0261260|mgl|INTRON|0],TranscriptAnnot[INTRON(MODIFIER||||4769|mgl|protein_coding|CODING|FBtr0302153|2|1);INTRON(MODIFIER||||4769|mgl|protein_coding|CODING|FBtr0343369|2|1);INTRON(MODIFIER||||4769|mgl|protein_coding|CODING|FBtr0343370|2|1);INTRON(MODIFIER||||4769|mgl|protein_coding|CODING|FBtr0343371|2|1)]	The gene Megalin is referred to in FlyBase by the symbol Dmel\mgl (CG42611, FBgn0261260). It is a protein_coding_gene from Drosophila melanogaster. It has 4 annotated transcripts and 4 polypeptides (1 unique). Gene sequence location is X:9358496..9500129. It has the cytological map location 8D10. Protein features are: Complement Clr-like EGF domain; EGF-like calcium-binding domain; EGF-like calci…
FBtr0302153	X_9293649_SNP	C	T	0.0618	11	167	4.26e-09	0.00733855	SiteClass[FBgn0261260|mgl|INTRON|0],TranscriptAnnot[INTRON(MODIFIER||||4769|mgl|protein_coding|CODING|FBtr0302153|2|1);INTRON(MODIFIER||||4769|mgl|protein_coding|CODING|FBtr0343369|2|1);INTRON(MODIFIER||||4769|mgl|protein_coding|CODING|FBtr0343370|2|1);INTRON(MODIFIER||||4769|mgl|protein_coding|CODING|FBtr0343371|2|1)]	-
FBtr0343369	X_9293649_SNP	C	T	0.0618	11	167	4.26e-09	0.00733855	SiteClass[FBgn0261260|mgl|INTRON|0],TranscriptAnnot[INTRON(MODIFIER||||4769|mgl|protein_coding|CODING|FBtr0302153|2|1);INTRON(MODIFIER||||4769|mgl|protein_coding|CODING|FBtr0343369|2|1);INTRON(MODIFIER||||4769|mgl|protein_coding|CODING|FBtr0343370|2|1);INTRON(MODIFIER||||4769|mgl|protein_coding|CODING|FBtr0343371|2|1)]	-
FBtr0343370	X_9293649_SNP	C	T	0.0618	11	167	4.26e-09	0.00733855	SiteClass[FBgn0261260|mgl|INTRON|0],TranscriptAnnot[INTRON(MODIFIER||||4769|mgl|protein_coding|CODING|FBtr0302153|2|1);INTRON(MODIFIER||||4769|mgl|protein_coding|CODING|FBtr0343369|2|1);INTRON(MODIFIER||||4769|mgl|protein_coding|CODING|FBtr0343370|2|1);INTRON(MODIFIER||||4769|mgl|protein_coding|CODING|FBtr0343371|2|1)]	-
FBtr0343371	X_9293649_SNP	C	T	0.0618	11	167	4.26e-09	0.00733855	SiteClass[FBgn0261260|mgl|INTRON|0],TranscriptAnnot[INTRON(MODIFIER||||4769|mgl|protein_coding|CODING|FBtr0302153|2|1);INTRON(MODIFIER||||4769|mgl|protein_coding|CODING|FBtr0343369|2|1);INTRON(MODIFIER||||4769|mgl|protein_coding|CODING|FBtr0343370|2|1);INTRON(MODIFIER||||4769|mgl|protein_coding|CODING|FBtr0343371|2|1)]	-
FBgn0039177	3R_20106448_SNP	C	A	0.05682	10	166	7.66e-09	0.00733855	SiteClass[FBgn0039177|CG13611|NON_SYNONYMOUS_CODING|0],TranscriptAnnot[NON_SYNONYMOUS_CODING(MODERATE|MISSENSE|caA/caC|Q213H|477|CG13611|protein_coding|CODING|FBtr0084600|3|1)]	This gene is referred to in FlyBase by the symbol Dmel\CG13611 (FBgn0039177). It is a protein_coding_gene from Drosophila melanogaster. It has one annotated transcript and one polypeptide. Gene sequence location is 3R:24279572..24281576. It has the cytological map location 95F8-95F9. Protein features are: Amine oxidase; FAD/NAD(P)-binding domain. Its molecular function is described by: oxidoreduc…
FBtr0084600	3R_20106448_SNP	C	A	0.05682	10	166	7.66e-09	0.00733855	SiteClass[FBgn0039177|CG13611|NON_SYNONYMOUS_CODING|0],TranscriptAnnot[NON_SYNONYMOUS_CODING(MODERATE|MISSENSE|caA/caC|Q213H|477|CG13611|protein_coding|CODING|FBtr0084600|3|1)]	-
FBgn0030512	X_13585381_SNP	C	G	0.06111	11	169	3.45e-08	0.0147838	SiteClass[FBgn0030512|CG9940|INTRON|0;FBgn0265726|NnaD|UPSTREAM|944],TranscriptAnnot[UPSTREAM(MODIFIER||944||1089|NnaD|protein_coding|CODING|FBtr0340675||1);UPSTREAM(MODIFIER||944||1890|NnaD|protein_coding|CODING|FBtr0340678||1);UPSTREAM(MODIFIER||944||1889|NnaD|protein_coding|CODING|FBtr0340679||1);UPSTREAM(MODIFIER||944||1694|NnaD|protein_coding|CODING|FBtr0340680||1);INTRON(MODIFIER||||787|CG9…	This gene is referred to in FlyBase by the symbol Dmel\CG9940 (FBgn0030512). It is a protein_coding_gene from Drosophila melanogaster. It has 3 annotated transcripts and 3 polypeptides (1 unique). Gene sequence location is X:13684380..13718285. It has the cytological map location 12B2-12B4. Protein features are: Carbon-nitrogen hydrolase; Glutamine-dependent NAD(+) synthetase; NAD(+) synthetase; …
FBgn0265726	X_13585381_SNP	C	G	0.06111	11	169	3.45e-08	0.0147838	SiteClass[FBgn0030512|CG9940|INTRON|0;FBgn0265726|NnaD|UPSTREAM|944],TranscriptAnnot[UPSTREAM(MODIFIER||944||1089|NnaD|protein_coding|CODING|FBtr0340675||1);UPSTREAM(MODIFIER||944||1890|NnaD|protein_coding|CODING|FBtr0340678||1);UPSTREAM(MODIFIER||944||1889|NnaD|protein_coding|CODING|FBtr0340679||1);UPSTREAM(MODIFIER||944||1694|NnaD|protein_coding|CODING|FBtr0340680||1);INTRON(MODIFIER||||787|CG9…	The gene Drosophila Nna1 ortholog is referred to in FlyBase by the symbol Dmel\NnaD (CG44533, FBgn0265726). It is a protein_coding_gene from Drosophila melanogaster. It has 10 annotated transcripts and 10 polypeptides (9 unique). Gene sequence location is X:13692292..13717835. It has the cytological map location 12B4. Protein features are: Peptidase M14, carboxypeptidase A. Its molecular function…
FBtr0340675	X_13585381_SNP	C	G	0.06111	11	169	3.45e-08	0.0147838	SiteClass[FBgn0030512|CG9940|INTRON|0;FBgn0265726|NnaD|UPSTREAM|944],TranscriptAnnot[UPSTREAM(MODIFIER||944||1089|NnaD|protein_coding|CODING|FBtr0340675||1);UPSTREAM(MODIFIER||944||1890|NnaD|protein_coding|CODING|FBtr0340678||1);UPSTREAM(MODIFIER||944||1889|NnaD|protein_coding|CODING|FBtr0340679||1);UPSTREAM(MODIFIER||944||1694|NnaD|protein_coding|CODING|FBtr0340680||1);INTRON(MODIFIER||||787|CG9…	-
FBtr0340678	X_13585381_SNP	C	G	0.06111	11	169	3.45e-08	0.0147838	SiteClass[FBgn0030512|CG9940|INTRON|0;FBgn0265726|NnaD|UPSTREAM|944],TranscriptAnnot[UPSTREAM(MODIFIER||944||1089|NnaD|protein_coding|CODING|FBtr0340675||1);UPSTREAM(MODIFIER||944||1890|NnaD|protein_coding|CODING|FBtr0340678||1);UPSTREAM(MODIFIER||944||1889|NnaD|protein_coding|CODING|FBtr0340679||1);UPSTREAM(MODIFIER||944||1694|NnaD|protein_coding|CODING|FBtr0340680||1);INTRON(MODIFIER||||787|CG9…	-
FBtr0340679	X_13585381_SNP	C	G	0.06111	11	169	3.45e-08	0.0147838	SiteClass[FBgn0030512|CG9940|INTRON|0;FBgn0265726|NnaD|UPSTREAM|944],TranscriptAnnot[UPSTREAM(MODIFIER||944||1089|NnaD|protein_coding|CODING|FBtr0340675||1);UPSTREAM(MODIFIER||944||1890|NnaD|protein_coding|CODING|FBtr0340678||1);UPSTREAM(MODIFIER||944||1889|NnaD|protein_coding|CODING|FBtr0340679||1);UPSTREAM(MODIFIER||944||1694|NnaD|protein_coding|CODING|FBtr0340680||1);INTRON(MODIFIER||||787|CG9…	-
FBtr0340680	X_13585381_SNP	C	G	0.06111	11	169	3.45e-08	0.0147838	SiteClass[FBgn0030512|CG9940|INTRON|0;FBgn0265726|NnaD|UPSTREAM|944],TranscriptAnnot[UPSTREAM(MODIFIER||944||1089|NnaD|protein_coding|CODING|FBtr0340675||1);UPSTREAM(MODIFIER||944||1890|NnaD|protein_coding|CODING|FBtr0340678||1);UPSTREAM(MODIFIER||944||1889|NnaD|protein_coding|CODING|FBtr0340679||1);UPSTREAM(MODIFIER||944||1694|NnaD|protein_coding|CODING|FBtr0340680||1);INTRON(MODIFIER||||787|CG9…	-
FBtr0073844	X_13585381_SNP	C	G	0.06111	11	169	3.45e-08	0.0147838	SiteClass[FBgn0030512|CG9940|INTRON|0;FBgn0265726|NnaD|UPSTREAM|944],TranscriptAnnot[UPSTREAM(MODIFIER||944||1089|NnaD|protein_coding|CODING|FBtr0340675||1);UPSTREAM(MODIFIER||944||1890|NnaD|protein_coding|CODING|FBtr0340678||1);UPSTREAM(MODIFIER||944||1889|NnaD|protein_coding|CODING|FBtr0340679||1);UPSTREAM(MODIFIER||944||1694|NnaD|protein_coding|CODING|FBtr0340680||1);INTRON(MODIFIER||||787|CG9…	-
FBtr0073845	X_13585381_SNP	C	G	0.06111	11	169	3.45e-08	0.0147838	SiteClass[FBgn0030512|CG9940|INTRON|0;FBgn0265726|NnaD|UPSTREAM|944],TranscriptAnnot[UPSTREAM(MODIFIER||944||1089|NnaD|protein_coding|CODING|FBtr0340675||1);UPSTREAM(MODIFIER||944||1890|NnaD|protein_coding|CODING|FBtr0340678||1);UPSTREAM(MODIFIER||944||1889|NnaD|protein_coding|CODING|FBtr0340679||1);UPSTREAM(MODIFIER||944||1694|NnaD|protein_coding|CODING|FBtr0340680||1);INTRON(MODIFIER||||787|CG9…	-
FBtr0343352	X_13585381_SNP	C	G	0.06111	11	169	3.45e-08	0.0147838	SiteClass[FBgn0030512|CG9940|INTRON|0;FBgn0265726|NnaD|UPSTREAM|944],TranscriptAnnot[UPSTREAM(MODIFIER||944||1089|NnaD|protein_coding|CODING|FBtr0340675||1);UPSTREAM(MODIFIER||944||1890|NnaD|protein_coding|CODING|FBtr0340678||1);UPSTREAM(MODIFIER||944||1889|NnaD|protein_coding|CODING|FBtr0340679||1);UPSTREAM(MODIFIER||944||1694|NnaD|protein_coding|CODING|FBtr0340680||1);INTRON(MODIFIER||||787|CG9…	-
FBgn0023479	3L_9069423_SNP	A	T	0.0618	11	167	6.91e-08	0.0147838	SiteClass[FBgn0023479|Tequila|INTRON|0],TranscriptAnnot[SYNONYMOUS_CODING(LOW|SILENT|ctT/ctA|L352|563|Tequila|protein_coding|CODING|FBtr0076527|5|1);SYNONYMOUS_CODING(LOW|SILENT|ctT/ctA|L352|2792|Tequila|protein_coding|CODING|FBtr0344981|5|1);SYNONYMOUS_CODING(LOW|SILENT|ctT/ctA|L352|2379|Tequila|protein_coding|CODING|FBtr0344980|5|1);INTRON(MODIFIER||||1450|Tequila|protein_coding|CODING|FBtr0076…	The gene Tequila is referred to in FlyBase by the symbol Dmel\Tequila (CG4821, FBgn0023479). It is a protein_coding_gene from Drosophila melanogaster. It has 4 annotated transcripts and 4 polypeptides (all unique). Gene sequence location is 3L:9074643..9092131. It has the cytological map location 66F4-66F5. Protein features are: Chitin binding domain; Low-density lipoprotein (LDL) receptor class …
FBtr0076527	3L_9069423_SNP	A	T	0.0618	11	167	6.91e-08	0.0147838	SiteClass[FBgn0023479|Tequila|INTRON|0],TranscriptAnnot[SYNONYMOUS_CODING(LOW|SILENT|ctT/ctA|L352|563|Tequila|protein_coding|CODING|FBtr0076527|5|1);SYNONYMOUS_CODING(LOW|SILENT|ctT/ctA|L352|2792|Tequila|protein_coding|CODING|FBtr0344981|5|1);SYNONYMOUS_CODING(LOW|SILENT|ctT/ctA|L352|2379|Tequila|protein_coding|CODING|FBtr0344980|5|1);INTRON(MODIFIER||||1450|Tequila|protein_coding|CODING|FBtr0076…	-
FBtr0344981	3L_9069423_SNP	A	T	0.0618	11	167	6.91e-08	0.0147838	SiteClass[FBgn0023479|Tequila|INTRON|0],TranscriptAnnot[SYNONYMOUS_CODING(LOW|SILENT|ctT/ctA|L352|563|Tequila|protein_coding|CODING|FBtr0076527|5|1);SYNONYMOUS_CODING(LOW|SILENT|ctT/ctA|L352|2792|Tequila|protein_coding|CODING|FBtr0344981|5|1);SYNONYMOUS_CODING(LOW|SILENT|ctT/ctA|L352|2379|Tequila|protein_coding|CODING|FBtr0344980|5|1);INTRON(MODIFIER||||1450|Tequila|protein_coding|CODING|FBtr0076…	-
FBtr0344980	3L_9069423_SNP	A	T	0.0618	11	167	6.91e-08	0.0147838	SiteClass[FBgn0023479|Tequila|INTRON|0],TranscriptAnnot[SYNONYMOUS_CODING(LOW|SILENT|ctT/ctA|L352|563|Tequila|protein_coding|CODING|FBtr0076527|5|1);SYNONYMOUS_CODING(LOW|SILENT|ctT/ctA|L352|2792|Tequila|protein_coding|CODING|FBtr0344981|5|1);SYNONYMOUS_CODING(LOW|SILENT|ctT/ctA|L352|2379|Tequila|protein_coding|CODING|FBtr0344980|5|1);INTRON(MODIFIER||||1450|Tequila|protein_coding|CODING|FBtr0076…	-
FBtr0076525	3L_9069423_SNP	A	T	0.0618	11	167	6.91e-08	0.0147838	SiteClass[FBgn0023479|Tequila|INTRON|0],TranscriptAnnot[SYNONYMOUS_CODING(LOW|SILENT|ctT/ctA|L352|563|Tequila|protein_coding|CODING|FBtr0076527|5|1);SYNONYMOUS_CODING(LOW|SILENT|ctT/ctA|L352|2792|Tequila|protein_coding|CODING|FBtr0344981|5|1);SYNONYMOUS_CODING(LOW|SILENT|ctT/ctA|L352|2379|Tequila|protein_coding|CODING|FBtr0344980|5|1);INTRON(MODIFIER||||1450|Tequila|protein_coding|CODING|FBtr0076…	-
FBgn0023479	3L_9069400_SNP	C	T	0.05618	10	168	7.15e-08	0.0147838	SiteClass[FBgn0023479|Tequila|INTRON|0],TranscriptAnnot[INTRON(MODIFIER||||1450|Tequila|protein_coding|CODING|FBtr0076525|2|1);INTRON(MODIFIER||||563|Tequila|protein_coding|CODING|FBtr0076527|4|1);INTRON(MODIFIER||||2379|Tequila|protein_coding|CODING|FBtr0344980|4|1);INTRON(MODIFIER||||2792|Tequila|protein_coding|CODING|FBtr0344981|4|1)]	The gene Tequila is referred to in FlyBase by the symbol Dmel\Tequila (CG4821, FBgn0023479). It is a protein_coding_gene from Drosophila melanogaster. It has 4 annotated transcripts and 4 polypeptides (all unique). Gene sequence location is 3L:9074643..9092131. It has the cytological map location 66F4-66F5. Protein features are: Chitin binding domain; Low-density lipoprotein (LDL) receptor class …
FBtr0076525	3L_9069400_SNP	C	T	0.05618	10	168	7.15e-08	0.0147838	SiteClass[FBgn0023479|Tequila|INTRON|0],TranscriptAnnot[INTRON(MODIFIER||||1450|Tequila|protein_coding|CODING|FBtr0076525|2|1);INTRON(MODIFIER||||563|Tequila|protein_coding|CODING|FBtr0076527|4|1);INTRON(MODIFIER||||2379|Tequila|protein_coding|CODING|FBtr0344980|4|1);INTRON(MODIFIER||||2792|Tequila|protein_coding|CODING|FBtr0344981|4|1)]	-
FBtr0076527	3L_9069400_SNP	C	T	0.05618	10	168	7.15e-08	0.0147838	SiteClass[FBgn0023479|Tequila|INTRON|0],TranscriptAnnot[INTRON(MODIFIER||||1450|Tequila|protein_coding|CODING|FBtr0076525|2|1);INTRON(MODIFIER||||563|Tequila|protein_coding|CODING|FBtr0076527|4|1);INTRON(MODIFIER||||2379|Tequila|protein_coding|CODING|FBtr0344980|4|1);INTRON(MODIFIER||||2792|Tequila|protein_coding|CODING|FBtr0344981|4|1)]	-
FBtr0344980	3L_9069400_SNP	C	T	0.05618	10	168	7.15e-08	0.0147838	SiteClass[FBgn0023479|Tequila|INTRON|0],TranscriptAnnot[INTRON(MODIFIER||||1450|Tequila|protein_coding|CODING|FBtr0076525|2|1);INTRON(MODIFIER||||563|Tequila|protein_coding|CODING|FBtr0076527|4|1);INTRON(MODIFIER||||2379|Tequila|protein_coding|CODING|FBtr0344980|4|1);INTRON(MODIFIER||||2792|Tequila|protein_coding|CODING|FBtr0344981|4|1)]	-
FBtr0344981	3L_9069400_SNP	C	T	0.05618	10	168	7.15e-08	0.0147838	SiteClass[FBgn0023479|Tequila|INTRON|0],TranscriptAnnot[INTRON(MODIFIER||||1450|Tequila|protein_coding|CODING|FBtr0076525|2|1);INTRON(MODIFIER||||563|Tequila|protein_coding|CODING|FBtr0076527|4|1);INTRON(MODIFIER||||2379|Tequila|protein_coding|CODING|FBtr0344980|4|1);INTRON(MODIFIER||||2792|Tequila|protein_coding|CODING|FBtr0344981|4|1)]	-
FBgn0023479	3L_9069410_INS	TAT	T	0.05618	10	168	7.15e-08	0.0147838	SiteClass[FBgn0023479|Tequila|INTRON|0],TranscriptAnnot[SPLICE_SITE_REGION(LOW||||563|Tequila|protein_coding|CODING|FBtr0076527|4|1);SPLICE_SITE_REGION(LOW||||2379|Tequila|protein_coding|CODING|FBtr0344980|4|1);SPLICE_SITE_REGION(LOW||||2792|Tequila|protein_coding|CODING|FBtr0344981|4|1);INTRON(MODIFIER||||1450|Tequila|protein_coding|CODING|FBtr0076525|2|1);INTRON(MODIFIER||||563|Tequila|protein_…	The gene Tequila is referred to in FlyBase by the symbol Dmel\Tequila (CG4821, FBgn0023479). It is a protein_coding_gene from Drosophila melanogaster. It has 4 annotated transcripts and 4 polypeptides (all unique). Gene sequence location is 3L:9074643..9092131. It has the cytological map location 66F4-66F5. Protein features are: Chitin binding domain; Low-density lipoprotein (LDL) receptor class …
FBtr0076527	3L_9069410_INS	TAT	T	0.05618	10	168	7.15e-08	0.0147838	SiteClass[FBgn0023479|Tequila|INTRON|0],TranscriptAnnot[SPLICE_SITE_REGION(LOW||||563|Tequila|protein_coding|CODING|FBtr0076527|4|1);SPLICE_SITE_REGION(LOW||||2379|Tequila|protein_coding|CODING|FBtr0344980|4|1);SPLICE_SITE_REGION(LOW||||2792|Tequila|protein_coding|CODING|FBtr0344981|4|1);INTRON(MODIFIER||||1450|Tequila|protein_coding|CODING|FBtr0076525|2|1);INTRON(MODIFIER||||563|Tequila|protein_…	-
FBtr0344980	3L_9069410_INS	TAT	T	0.05618	10	168	7.15e-08	0.0147838	SiteClass[FBgn0023479|Tequila|INTRON|0],TranscriptAnnot[SPLICE_SITE_REGION(LOW||||563|Tequila|protein_coding|CODING|FBtr0076527|4|1);SPLICE_SITE_REGION(LOW||||2379|Tequila|protein_coding|CODING|FBtr0344980|4|1);SPLICE_SITE_REGION(LOW||||2792|Tequila|protein_coding|CODING|FBtr0344981|4|1);INTRON(MODIFIER||||1450|Tequila|protein_coding|CODING|FBtr0076525|2|1);INTRON(MODIFIER||||563|Tequila|protein_…	-
FBtr0344981	3L_9069410_INS	TAT	T	0.05618	10	168	7.15e-08	0.0147838	SiteClass[FBgn0023479|Tequila|INTRON|0],TranscriptAnnot[SPLICE_SITE_REGION(LOW||||563|Tequila|protein_coding|CODING|FBtr0076527|4|1);SPLICE_SITE_REGION(LOW||||2379|Tequila|protein_coding|CODING|FBtr0344980|4|1);SPLICE_SITE_REGION(LOW||||2792|Tequila|protein_coding|CODING|FBtr0344981|4|1);INTRON(MODIFIER||||1450|Tequila|protein_coding|CODING|FBtr0076525|2|1);INTRON(MODIFIER||||563|Tequila|protein_…	-
FBtr0076525	3L_9069410_INS	TAT	T	0.05618	10	168	7.15e-08	0.0147838	SiteClass[FBgn0023479|Tequila|INTRON|0],TranscriptAnnot[SPLICE_SITE_REGION(LOW||||563|Tequila|protein_coding|CODING|FBtr0076527|4|1);SPLICE_SITE_REGION(LOW||||2379|Tequila|protein_coding|CODING|FBtr0344980|4|1);SPLICE_SITE_REGION(LOW||||2792|Tequila|protein_coding|CODING|FBtr0344981|4|1);INTRON(MODIFIER||||1450|Tequila|protein_coding|CODING|FBtr0076525|2|1);INTRON(MODIFIER||||563|Tequila|protein_…	-
FBtr0076527	3L_9069410_INS	TAT	T	0.05618	10	168	7.15e-08	0.0147838	SiteClass[FBgn0023479|Tequila|INTRON|0],TranscriptAnnot[SPLICE_SITE_REGION(LOW||||563|Tequila|protein_coding|CODING|FBtr0076527|4|1);SPLICE_SITE_REGION(LOW||||2379|Tequila|protein_coding|CODING|FBtr0344980|4|1);SPLICE_SITE_REGION(LOW||||2792|Tequila|protein_coding|CODING|FBtr0344981|4|1);INTRON(MODIFIER||||1450|Tequila|protein_coding|CODING|FBtr0076525|2|1);INTRON(MODIFIER||||563|Tequila|protein_…	-
FBtr0344980	3L_9069410_INS	TAT	T	0.05618	10	168	7.15e-08	0.0147838	SiteClass[FBgn0023479|Tequila|INTRON|0],TranscriptAnnot[SPLICE_SITE_REGION(LOW||||563|Tequila|protein_coding|CODING|FBtr0076527|4|1);SPLICE_SITE_REGION(LOW||||2379|Tequila|protein_coding|CODING|FBtr0344980|4|1);SPLICE_SITE_REGION(LOW||||2792|Tequila|protein_coding|CODING|FBtr0344981|4|1);INTRON(MODIFIER||||1450|Tequila|protein_coding|CODING|FBtr0076525|2|1);INTRON(MODIFIER||||563|Tequila|protein_…	-
FBtr0344981	3L_9069410_INS	TAT	T	0.05618	10	168	7.15e-08	0.0147838	SiteClass[FBgn0023479|Tequila|INTRON|0],TranscriptAnnot[SPLICE_SITE_REGION(LOW||||563|Tequila|protein_coding|CODING|FBtr0076527|4|1);SPLICE_SITE_REGION(LOW||||2379|Tequila|protein_coding|CODING|FBtr0344980|4|1);SPLICE_SITE_REGION(LOW||||2792|Tequila|protein_coding|CODING|FBtr0344981|4|1);INTRON(MODIFIER||||1450|Tequila|protein_coding|CODING|FBtr0076525|2|1);INTRON(MODIFIER||||563|Tequila|protein_…	-
FBgn0023479	3L_9069403_SNP	C	G	0.05682	10	166	7.38e-08	0.0147838	SiteClass[FBgn0023479|Tequila|INTRON|0],TranscriptAnnot[INTRON(MODIFIER||||1450|Tequila|protein_coding|CODING|FBtr0076525|2|1);INTRON(MODIFIER||||563|Tequila|protein_coding|CODING|FBtr0076527|4|1);INTRON(MODIFIER||||2379|Tequila|protein_coding|CODING|FBtr0344980|4|1);INTRON(MODIFIER||||2792|Tequila|protein_coding|CODING|FBtr0344981|4|1)]	The gene Tequila is referred to in FlyBase by the symbol Dmel\Tequila (CG4821, FBgn0023479). It is a protein_coding_gene from Drosophila melanogaster. It has 4 annotated transcripts and 4 polypeptides (all unique). Gene sequence location is 3L:9074643..9092131. It has the cytological map location 66F4-66F5. Protein features are: Chitin binding domain; Low-density lipoprotein (LDL) receptor class …
FBtr0076525	3L_9069403_SNP	C	G	0.05682	10	166	7.38e-08	0.0147838	SiteClass[FBgn0023479|Tequila|INTRON|0],TranscriptAnnot[INTRON(MODIFIER||||1450|Tequila|protein_coding|CODING|FBtr0076525|2|1);INTRON(MODIFIER||||563|Tequila|protein_coding|CODING|FBtr0076527|4|1);INTRON(MODIFIER||||2379|Tequila|protein_coding|CODING|FBtr0344980|4|1);INTRON(MODIFIER||||2792|Tequila|protein_coding|CODING|FBtr0344981|4|1)]	-
FBtr0076527	3L_9069403_SNP	C	G	0.05682	10	166	7.38e-08	0.0147838	SiteClass[FBgn0023479|Tequila|INTRON|0],TranscriptAnnot[INTRON(MODIFIER||||1450|Tequila|protein_coding|CODING|FBtr0076525|2|1);INTRON(MODIFIER||||563|Tequila|protein_coding|CODING|FBtr0076527|4|1);INTRON(MODIFIER||||2379|Tequila|protein_coding|CODING|FBtr0344980|4|1);INTRON(MODIFIER||||2792|Tequila|protein_coding|CODING|FBtr0344981|4|1)]	-
FBtr0344980	3L_9069403_SNP	C	G	0.05682	10	166	7.38e-08	0.0147838	SiteClass[FBgn0023479|Tequila|INTRON|0],TranscriptAnnot[INTRON(MODIFIER||||1450|Tequila|protein_coding|CODING|FBtr0076525|2|1);INTRON(MODIFIER||||563|Tequila|protein_coding|CODING|FBtr0076527|4|1);INTRON(MODIFIER||||2379|Tequila|protein_coding|CODING|FBtr0344980|4|1);INTRON(MODIFIER||||2792|Tequila|protein_coding|CODING|FBtr0344981|4|1)]	-
FBtr0344981	3L_9069403_SNP	C	G	0.05682	10	166	7.38e-08	0.0147838	SiteClass[FBgn0023479|Tequila|INTRON|0],TranscriptAnnot[INTRON(MODIFIER||||1450|Tequila|protein_coding|CODING|FBtr0076525|2|1);INTRON(MODIFIER||||563|Tequila|protein_coding|CODING|FBtr0076527|4|1);INTRON(MODIFIER||||2379|Tequila|protein_coding|CODING|FBtr0344980|4|1);INTRON(MODIFIER||||2792|Tequila|protein_coding|CODING|FBtr0344981|4|1)]	-
FBgn0023479	3L_9069415_SNP	T	C	0.05682	10	166	7.71e-08	0.0147838	SiteClass[FBgn0023479|Tequila|INTRON|0],TranscriptAnnot[SPLICE_SITE_REGION(LOW||||563|Tequila|protein_coding|CODING|FBtr0076527|4|1);SPLICE_SITE_REGION(LOW||||2379|Tequila|protein_coding|CODING|FBtr0344980|4|1);SPLICE_SITE_REGION(LOW||||2792|Tequila|protein_coding|CODING|FBtr0344981|4|1);INTRON(MODIFIER||||1450|Tequila|protein_coding|CODING|FBtr0076525|2|1);INTRON(MODIFIER||||563|Tequila|protein_…	The gene Tequila is referred to in FlyBase by the symbol Dmel\Tequila (CG4821, FBgn0023479). It is a protein_coding_gene from Drosophila melanogaster. It has 4 annotated transcripts and 4 polypeptides (all unique). Gene sequence location is 3L:9074643..9092131. It has the cytological map location 66F4-66F5. Protein features are: Chitin binding domain; Low-density lipoprotein (LDL) receptor class …
FBtr0076527	3L_9069415_SNP	T	C	0.05682	10	166	7.71e-08	0.0147838	SiteClass[FBgn0023479|Tequila|INTRON|0],TranscriptAnnot[SPLICE_SITE_REGION(LOW||||563|Tequila|protein_coding|CODING|FBtr0076527|4|1);SPLICE_SITE_REGION(LOW||||2379|Tequila|protein_coding|CODING|FBtr0344980|4|1);SPLICE_SITE_REGION(LOW||||2792|Tequila|protein_coding|CODING|FBtr0344981|4|1);INTRON(MODIFIER||||1450|Tequila|protein_coding|CODING|FBtr0076525|2|1);INTRON(MODIFIER||||563|Tequila|protein_…	-
FBtr0344980	3L_9069415_SNP	T	C	0.05682	10	166	7.71e-08	0.0147838	SiteClass[FBgn0023479|Tequila|INTRON|0],TranscriptAnnot[SPLICE_SITE_REGION(LOW||||563|Tequila|protein_coding|CODING|FBtr0076527|4|1);SPLICE_SITE_REGION(LOW||||2379|Tequila|protein_coding|CODING|FBtr0344980|4|1);SPLICE_SITE_REGION(LOW||||2792|Tequila|protein_coding|CODING|FBtr0344981|4|1);INTRON(MODIFIER||||1450|Tequila|protein_coding|CODING|FBtr0076525|2|1);INTRON(MODIFIER||||563|Tequila|protein_…	-
FBtr0344981	3L_9069415_SNP	T	C	0.05682	10	166	7.71e-08	0.0147838	SiteClass[FBgn0023479|Tequila|INTRON|0],TranscriptAnnot[SPLICE_SITE_REGION(LOW||||563|Tequila|protein_coding|CODING|FBtr0076527|4|1);SPLICE_SITE_REGION(LOW||||2379|Tequila|protein_coding|CODING|FBtr0344980|4|1);SPLICE_SITE_REGION(LOW||||2792|Tequila|protein_coding|CODING|FBtr0344981|4|1);INTRON(MODIFIER||||1450|Tequila|protein_coding|CODING|FBtr0076525|2|1);INTRON(MODIFIER||||563|Tequila|protein_…	-
FBtr0076525	3L_9069415_SNP	T	C	0.05682	10	166	7.71e-08	0.0147838	SiteClass[FBgn0023479|Tequila|INTRON|0],TranscriptAnnot[SPLICE_SITE_REGION(LOW||||563|Tequila|protein_coding|CODING|FBtr0076527|4|1);SPLICE_SITE_REGION(LOW||||2379|Tequila|protein_coding|CODING|FBtr0344980|4|1);SPLICE_SITE_REGION(LOW||||2792|Tequila|protein_coding|CODING|FBtr0344981|4|1);INTRON(MODIFIER||||1450|Tequila|protein_coding|CODING|FBtr0076525|2|1);INTRON(MODIFIER||||563|Tequila|protein_…	-
FBtr0076527	3L_9069415_SNP	T	C	0.05682	10	166	7.71e-08	0.0147838	SiteClass[FBgn0023479|Tequila|INTRON|0],TranscriptAnnot[SPLICE_SITE_REGION(LOW||||563|Tequila|protein_coding|CODING|FBtr0076527|4|1);SPLICE_SITE_REGION(LOW||||2379|Tequila|protein_coding|CODING|FBtr0344980|4|1);SPLICE_SITE_REGION(LOW||||2792|Tequila|protein_coding|CODING|FBtr0344981|4|1);INTRON(MODIFIER||||1450|Tequila|protein_coding|CODING|FBtr0076525|2|1);INTRON(MODIFIER||||563|Tequila|protein_…	-
FBtr0344980	3L_9069415_SNP	T	C	0.05682	10	166	7.71e-08	0.0147838	SiteClass[FBgn0023479|Tequila|INTRON|0],TranscriptAnnot[SPLICE_SITE_REGION(LOW||||563|Tequila|protein_coding|CODING|FBtr0076527|4|1);SPLICE_SITE_REGION(LOW||||2379|Tequila|protein_coding|CODING|FBtr0344980|4|1);SPLICE_SITE_REGION(LOW||||2792|Tequila|protein_coding|CODING|FBtr0344981|4|1);INTRON(MODIFIER||||1450|Tequila|protein_coding|CODING|FBtr0076525|2|1);INTRON(MODIFIER||||563|Tequila|protein_…	-
FBtr0344981	3L_9069415_SNP	T	C	0.05682	10	166	7.71e-08	0.0147838	SiteClass[FBgn0023479|Tequila|INTRON|0],TranscriptAnnot[SPLICE_SITE_REGION(LOW||||563|Tequila|protein_coding|CODING|FBtr0076527|4|1);SPLICE_SITE_REGION(LOW||||2379|Tequila|protein_coding|CODING|FBtr0344980|4|1);SPLICE_SITE_REGION(LOW||||2792|Tequila|protein_coding|CODING|FBtr0344981|4|1);INTRON(MODIFIER||||1450|Tequila|protein_coding|CODING|FBtr0076525|2|1);INTRON(MODIFIER||||563|Tequila|protein_…	-
FBgn0262617	3R_6099938_SNP	C	T	0.06215	11	166	1.03e-07	0.0179641	SiteClass[FBgn0262617|CG43143|INTRON|0],TranscriptAnnot[INTRON(MODIFIER||||1180|CG43143|protein_coding|CODING|FBtr0305351|1|1);INTRON(MODIFIER||||1427|CG43143|protein_coding|CODING|FBtr0305354|1|1);INTRON(MODIFIER||||1532|CG43143|protein_coding|CODING|FBtr0305356|1|1);INTRON(MODIFIER||||2556|CG43143|protein_coding|CODING|FBtr0337050|1|1)]	This gene is referred to in FlyBase by the symbol Dmel\CG43143 (FBgn0262617). It is a protein_coding_gene from Drosophila melanogaster. It has 9 annotated transcripts and 9 polypeptides (7 unique). Gene sequence location is 3R:10264306..10308467. It has the cytological map location 86A7. Protein features are: Protein kinase domain; Protein kinase, ATP binding site; Protein kinase-like domain; Ser…
FBtr0305351	3R_6099938_SNP	C	T	0.06215	11	166	1.03e-07	0.0179641	SiteClass[FBgn0262617|CG43143|INTRON|0],TranscriptAnnot[INTRON(MODIFIER||||1180|CG43143|protein_coding|CODING|FBtr0305351|1|1);INTRON(MODIFIER||||1427|CG43143|protein_coding|CODING|FBtr0305354|1|1);INTRON(MODIFIER||||1532|CG43143|protein_coding|CODING|FBtr0305356|1|1);INTRON(MODIFIER||||2556|CG43143|protein_coding|CODING|FBtr0337050|1|1)]	-
FBtr0305354	3R_6099938_SNP	C	T	0.06215	11	166	1.03e-07	0.0179641	SiteClass[FBgn0262617|CG43143|INTRON|0],TranscriptAnnot[INTRON(MODIFIER||||1180|CG43143|protein_coding|CODING|FBtr0305351|1|1);INTRON(MODIFIER||||1427|CG43143|protein_coding|CODING|FBtr0305354|1|1);INTRON(MODIFIER||||1532|CG43143|protein_coding|CODING|FBtr0305356|1|1);INTRON(MODIFIER||||2556|CG43143|protein_coding|CODING|FBtr0337050|1|1)]	-
FBtr0305356	3R_6099938_SNP	C	T	0.06215	11	166	1.03e-07	0.0179641	SiteClass[FBgn0262617|CG43143|INTRON|0],TranscriptAnnot[INTRON(MODIFIER||||1180|CG43143|protein_coding|CODING|FBtr0305351|1|1);INTRON(MODIFIER||||1427|CG43143|protein_coding|CODING|FBtr0305354|1|1);INTRON(MODIFIER||||1532|CG43143|protein_coding|CODING|FBtr0305356|1|1);INTRON(MODIFIER||||2556|CG43143|protein_coding|CODING|FBtr0337050|1|1)]	-
FBtr0337050	3R_6099938_SNP	C	T	0.06215	11	166	1.03e-07	0.0179641	SiteClass[FBgn0262617|CG43143|INTRON|0],TranscriptAnnot[INTRON(MODIFIER||||1180|CG43143|protein_coding|CODING|FBtr0305351|1|1);INTRON(MODIFIER||||1427|CG43143|protein_coding|CODING|FBtr0305354|1|1);INTRON(MODIFIER||||1532|CG43143|protein_coding|CODING|FBtr0305356|1|1);INTRON(MODIFIER||||2556|CG43143|protein_coding|CODING|FBtr0337050|1|1)]	-
FBgn0037418	3R_2093759_SNP	T	C	0.05114	9	167	1.32e-07	0.0211459	SiteClass[FBgn0037418|Osi11|NON_SYNONYMOUS_CODING|0;FBgn0037417|Osi10|DOWNSTREAM|642],TranscriptAnnot[NON_SYNONYMOUS_CODING(MODERATE|MISSENSE|Gct/Act|A218T|302|Osi11|protein_coding|CODING|FBtr0078614|1|1);DOWNSTREAM(MODIFIER||642||576|Osi10|protein_coding|CODING|FBtr0078601||1)]	The gene Osiris 11 is referred to in FlyBase by the symbol Dmel\Osi11 (CG15596, FBgn0037418). It is a protein_coding_gene from Drosophila melanogaster. It has one annotated transcript and one polypeptide. Gene sequence location is 3R:6267591..6268757. It has the cytological map location 83E2. Protein features are: Protein of unknown function DUF1676. Its molecular function is described by: . It i…
FBgn0037417	3R_2093759_SNP	T	C	0.05114	9	167	1.32e-07	0.0211459	SiteClass[FBgn0037418|Osi11|NON_SYNONYMOUS_CODING|0;FBgn0037417|Osi10|DOWNSTREAM|642],TranscriptAnnot[NON_SYNONYMOUS_CODING(MODERATE|MISSENSE|Gct/Act|A218T|302|Osi11|protein_coding|CODING|FBtr0078614|1|1);DOWNSTREAM(MODIFIER||642||576|Osi10|protein_coding|CODING|FBtr0078601||1)]	The gene Osiris 10 is referred to in FlyBase by the symbol Dmel\Osi10 (CG15593, FBgn0037417). It is a protein_coding_gene from Drosophila melanogaster. It has one annotated transcript and one polypeptide. Gene sequence location is 3R:6263976..6267395. It has the cytological map location 83E2. Protein features are: Protein of unknown function DUF1676. Its molecular function is described by: . It i…
FBtr0078614	3R_2093759_SNP	T	C	0.05114	9	167	1.32e-07	0.0211459	SiteClass[FBgn0037418|Osi11|NON_SYNONYMOUS_CODING|0;FBgn0037417|Osi10|DOWNSTREAM|642],TranscriptAnnot[NON_SYNONYMOUS_CODING(MODERATE|MISSENSE|Gct/Act|A218T|302|Osi11|protein_coding|CODING|FBtr0078614|1|1);DOWNSTREAM(MODIFIER||642||576|Osi10|protein_coding|CODING|FBtr0078601||1)]	-
FBtr0078601	3R_2093759_SNP	T	C	0.05114	9	167	1.32e-07	0.0211459	SiteClass[FBgn0037418|Osi11|NON_SYNONYMOUS_CODING|0;FBgn0037417|Osi10|DOWNSTREAM|642],TranscriptAnnot[NON_SYNONYMOUS_CODING(MODERATE|MISSENSE|Gct/Act|A218T|302|Osi11|protein_coding|CODING|FBtr0078614|1|1);DOWNSTREAM(MODIFIER||642||576|Osi10|protein_coding|CODING|FBtr0078601||1)]	-
FBgn0086450	X_9095081_SNP	G	T	0.125	21	147	1.5e-07	0.0221617	SiteClass[FBgn0086450|su_r_|INTRON|0],TranscriptAnnot[INTRON(MODIFIER||||1031|su_r_|protein_coding|CODING|FBtr0071338|1|1)]	The gene suppressor of rudimentary is referred to in FlyBase by the symbol Dmel\su(r) (CG2194, FBgn0086450). It is a protein_coding_gene from Drosophila melanogaster. It has one annotated transcript and one polypeptide. Gene sequence location is X:9196808..9201820. It has the cytological map location 8D1. Protein features are: 4Fe-4S ferredoxin, iron-sulphur binding, conserved site; 4Fe-4S ferred…
FBtr0071338	X_9095081_SNP	G	T	0.125	21	147	1.5e-07	0.0221617	SiteClass[FBgn0086450|su_r_|INTRON|0],TranscriptAnnot[INTRON(MODIFIER||||1031|su_r_|protein_coding|CODING|FBtr0071338|1|1)]	-
FBgn0262027	3L_19418081_SNP	G	T	0.05747	10	164	2.09e-07	0.0230704	SiteClass[FBgn0262027|CR42838|DOWNSTREAM|55;FBgn0052205|CR32205|UPSTREAM|798;FBgn0053255|CG33255|DOWNSTREAM|835],TranscriptAnnot[UPSTREAM(MODIFIER||798|||CR32205|ncRNA|NON_CODING|FBtr0075000||1);UPSTREAM(MODIFIER||798|||CR32205|ncRNA|NON_CODING|FBtr0343096||1);UPSTREAM(MODIFIER||798|||CR32205|ncRNA|NON_CODING|FBtr0343097||1);DOWNSTREAM(MODIFIER||835||109|CG33255|protein_coding|CODING|FBtr0303862|…	This gene is referred to in FlyBase by the symbol Dmel\CR42838 (FBgn0262027). It is a pseudogene_attribute from Drosophila melanogaster. It has one annotated transcript. Gene sequence location is 3L:19424702..19424926. It has the cytological map location 76B3. Its molecular function is unknown. The biological processes in which it is involved are not known. No alleles are reported.
FBgn0052205	3L_19418081_SNP	G	T	0.05747	10	164	2.09e-07	0.0230704	SiteClass[FBgn0262027|CR42838|DOWNSTREAM|55;FBgn0052205|CR32205|UPSTREAM|798;FBgn0053255|CG33255|DOWNSTREAM|835],TranscriptAnnot[UPSTREAM(MODIFIER||798|||CR32205|ncRNA|NON_CODING|FBtr0075000||1);UPSTREAM(MODIFIER||798|||CR32205|ncRNA|NON_CODING|FBtr0343096||1);UPSTREAM(MODIFIER||798|||CR32205|ncRNA|NON_CODING|FBtr0343097||1);DOWNSTREAM(MODIFIER||835||109|CG33255|protein_coding|CODING|FBtr0303862|…	This gene is referred to in FlyBase by the symbol Dmel\CR32205 (FBgn0052205). It is a pseudogene_attribute from Drosophila melanogaster. It has 3 annotated transcripts. Gene sequence location is 3L:19422838..19424183. It has the cytological map location 76B3. Its molecular function is unknown. The biological processes in which it is involved are not known. No alleles are reported. Summary of modE…
FBgn0053255	3L_19418081_SNP	G	T	0.05747	10	164	2.09e-07	0.0230704	SiteClass[FBgn0262027|CR42838|DOWNSTREAM|55;FBgn0052205|CR32205|UPSTREAM|798;FBgn0053255|CG33255|DOWNSTREAM|835],TranscriptAnnot[UPSTREAM(MODIFIER||798|||CR32205|ncRNA|NON_CODING|FBtr0075000||1);UPSTREAM(MODIFIER||798|||CR32205|ncRNA|NON_CODING|FBtr0343096||1);UPSTREAM(MODIFIER||798|||CR32205|ncRNA|NON_CODING|FBtr0343097||1);DOWNSTREAM(MODIFIER||835||109|CG33255|protein_coding|CODING|FBtr0303862|…	This gene is referred to in FlyBase by the symbol Dmel\CR33255 (FBgn0053255). It is a pseudogene_attribute from Drosophila melanogaster. It has one annotated transcript. Gene sequence location is 3L:19423758..19424146. It has the cytological map location 76B3. Its molecular function is described by: . It is involved in the biological process described with: . 3 alleles are reported. No phenotypic…
FBtr0075000	3L_19418081_SNP	G	T	0.05747	10	164	2.09e-07	0.0230704	SiteClass[FBgn0262027|CR42838|DOWNSTREAM|55;FBgn0052205|CR32205|UPSTREAM|798;FBgn0053255|CG33255|DOWNSTREAM|835],TranscriptAnnot[UPSTREAM(MODIFIER||798|||CR32205|ncRNA|NON_CODING|FBtr0075000||1);UPSTREAM(MODIFIER||798|||CR32205|ncRNA|NON_CODING|FBtr0343096||1);UPSTREAM(MODIFIER||798|||CR32205|ncRNA|NON_CODING|FBtr0343097||1);DOWNSTREAM(MODIFIER||835||109|CG33255|protein_coding|CODING|FBtr0303862|…	-
FBtr0343096	3L_19418081_SNP	G	T	0.05747	10	164	2.09e-07	0.0230704	SiteClass[FBgn0262027|CR42838|DOWNSTREAM|55;FBgn0052205|CR32205|UPSTREAM|798;FBgn0053255|CG33255|DOWNSTREAM|835],TranscriptAnnot[UPSTREAM(MODIFIER||798|||CR32205|ncRNA|NON_CODING|FBtr0075000||1);UPSTREAM(MODIFIER||798|||CR32205|ncRNA|NON_CODING|FBtr0343096||1);UPSTREAM(MODIFIER||798|||CR32205|ncRNA|NON_CODING|FBtr0343097||1);DOWNSTREAM(MODIFIER||835||109|CG33255|protein_coding|CODING|FBtr0303862|…	-
FBtr0343097	3L_19418081_SNP	G	T	0.05747	10	164	2.09e-07	0.0230704	SiteClass[FBgn0262027|CR42838|DOWNSTREAM|55;FBgn0052205|CR32205|UPSTREAM|798;FBgn0053255|CG33255|DOWNSTREAM|835],TranscriptAnnot[UPSTREAM(MODIFIER||798|||CR32205|ncRNA|NON_CODING|FBtr0075000||1);UPSTREAM(MODIFIER||798|||CR32205|ncRNA|NON_CODING|FBtr0343096||1);UPSTREAM(MODIFIER||798|||CR32205|ncRNA|NON_CODING|FBtr0343097||1);DOWNSTREAM(MODIFIER||835||109|CG33255|protein_coding|CODING|FBtr0303862|…	-
FBtr0303862	3L_19418081_SNP	G	T	0.05747	10	164	2.09e-07	0.0230704	SiteClass[FBgn0262027|CR42838|DOWNSTREAM|55;FBgn0052205|CR32205|UPSTREAM|798;FBgn0053255|CG33255|DOWNSTREAM|835],TranscriptAnnot[UPSTREAM(MODIFIER||798|||CR32205|ncRNA|NON_CODING|FBtr0075000||1);UPSTREAM(MODIFIER||798|||CR32205|ncRNA|NON_CODING|FBtr0343096||1);UPSTREAM(MODIFIER||798|||CR32205|ncRNA|NON_CODING|FBtr0343097||1);DOWNSTREAM(MODIFIER||835||109|CG33255|protein_coding|CODING|FBtr0303862|…	-
FBtr0303863	3L_19418081_SNP	G	T	0.05747	10	164	2.09e-07	0.0230704	SiteClass[FBgn0262027|CR42838|DOWNSTREAM|55;FBgn0052205|CR32205|UPSTREAM|798;FBgn0053255|CG33255|DOWNSTREAM|835],TranscriptAnnot[UPSTREAM(MODIFIER||798|||CR32205|ncRNA|NON_CODING|FBtr0075000||1);UPSTREAM(MODIFIER||798|||CR32205|ncRNA|NON_CODING|FBtr0343096||1);UPSTREAM(MODIFIER||798|||CR32205|ncRNA|NON_CODING|FBtr0343097||1);DOWNSTREAM(MODIFIER||835||109|CG33255|protein_coding|CODING|FBtr0303862|…	-
FBgn0036777	3L_18109144_SNP	G	C	0.1404	24	147	2.17e-07	0.0230704	SiteClass[FBgn0036777|CG7341|INTRON|0;FBgn0052195|CG32195|DOWNSTREAM|69],TranscriptAnnot[UTR_3_PRIME(MODIFIER||284||401|CG32195|protein_coding|CODING|FBtr0075125|4|1);DOWNSTREAM(MODIFIER||69||401|CG32195|protein_coding|CODING|FBtr0333696||1);DOWNSTREAM(MODIFIER||69||401|CG32195|protein_coding|CODING|FBtr0333697||1);INTRON(MODIFIER||||357|CG7341|protein_coding|CODING|FBtr0075124|1|1);INTRON(MODIFI…	This gene is referred to in FlyBase by the symbol Dmel\CG7341 (FBgn0036777). It is a protein_coding_gene from Drosophila melanogaster. It has 2 annotated transcripts and 2 polypeptides (1 unique). Gene sequence location is 3L:18112959..18121003. It has the cytological map location 75B10. Its molecular function is unknown. The biological processes in which it is involved are not known. 7 alleles a…
FBgn0052195	3L_18109144_SNP	G	C	0.1404	24	147	2.17e-07	0.0230704	SiteClass[FBgn0036777|CG7341|INTRON|0;FBgn0052195|CG32195|DOWNSTREAM|69],TranscriptAnnot[UTR_3_PRIME(MODIFIER||284||401|CG32195|protein_coding|CODING|FBtr0075125|4|1);DOWNSTREAM(MODIFIER||69||401|CG32195|protein_coding|CODING|FBtr0333696||1);DOWNSTREAM(MODIFIER||69||401|CG32195|protein_coding|CODING|FBtr0333697||1);INTRON(MODIFIER||||357|CG7341|protein_coding|CODING|FBtr0075124|1|1);INTRON(MODIFI…	This gene is referred to in FlyBase by the symbol Dmel\CG32195 (FBgn0052195). It is a protein_coding_gene from Drosophila melanogaster. It has 3 annotated transcripts and 3 polypeptides (1 unique). Gene sequence location is 3L:18112959..18119150. It has the cytological map location 75B10. Protein features are: CHK kinase-like; Protein kinase-like domain; Protein of unknown function DUF227. Its mo…
FBtr0075125	3L_18109144_SNP	G	C	0.1404	24	147	2.17e-07	0.0230704	SiteClass[FBgn0036777|CG7341|INTRON|0;FBgn0052195|CG32195|DOWNSTREAM|69],TranscriptAnnot[UTR_3_PRIME(MODIFIER||284||401|CG32195|protein_coding|CODING|FBtr0075125|4|1);DOWNSTREAM(MODIFIER||69||401|CG32195|protein_coding|CODING|FBtr0333696||1);DOWNSTREAM(MODIFIER||69||401|CG32195|protein_coding|CODING|FBtr0333697||1);INTRON(MODIFIER||||357|CG7341|protein_coding|CODING|FBtr0075124|1|1);INTRON(MODIFI…	-
FBtr0333696	3L_18109144_SNP	G	C	0.1404	24	147	2.17e-07	0.0230704	SiteClass[FBgn0036777|CG7341|INTRON|0;FBgn0052195|CG32195|DOWNSTREAM|69],TranscriptAnnot[UTR_3_PRIME(MODIFIER||284||401|CG32195|protein_coding|CODING|FBtr0075125|4|1);DOWNSTREAM(MODIFIER||69||401|CG32195|protein_coding|CODING|FBtr0333696||1);DOWNSTREAM(MODIFIER||69||401|CG32195|protein_coding|CODING|FBtr0333697||1);INTRON(MODIFIER||||357|CG7341|protein_coding|CODING|FBtr0075124|1|1);INTRON(MODIFI…	-
FBtr0333697	3L_18109144_SNP	G	C	0.1404	24	147	2.17e-07	0.0230704	SiteClass[FBgn0036777|CG7341|INTRON|0;FBgn0052195|CG32195|DOWNSTREAM|69],TranscriptAnnot[UTR_3_PRIME(MODIFIER||284||401|CG32195|protein_coding|CODING|FBtr0075125|4|1);DOWNSTREAM(MODIFIER||69||401|CG32195|protein_coding|CODING|FBtr0333696||1);DOWNSTREAM(MODIFIER||69||401|CG32195|protein_coding|CODING|FBtr0333697||1);INTRON(MODIFIER||||357|CG7341|protein_coding|CODING|FBtr0075124|1|1);INTRON(MODIFI…	-
FBtr0075124	3L_18109144_SNP	G	C	0.1404	24	147	2.17e-07	0.0230704	SiteClass[FBgn0036777|CG7341|INTRON|0;FBgn0052195|CG32195|DOWNSTREAM|69],TranscriptAnnot[UTR_3_PRIME(MODIFIER||284||401|CG32195|protein_coding|CODING|FBtr0075125|4|1);DOWNSTREAM(MODIFIER||69||401|CG32195|protein_coding|CODING|FBtr0333696||1);DOWNSTREAM(MODIFIER||69||401|CG32195|protein_coding|CODING|FBtr0333697||1);INTRON(MODIFIER||||357|CG7341|protein_coding|CODING|FBtr0075124|1|1);INTRON(MODIFI…	-
FBtr0075123	3L_18109144_SNP	G	C	0.1404	24	147	2.17e-07	0.0230704	SiteClass[FBgn0036777|CG7341|INTRON|0;FBgn0052195|CG32195|DOWNSTREAM|69],TranscriptAnnot[UTR_3_PRIME(MODIFIER||284||401|CG32195|protein_coding|CODING|FBtr0075125|4|1);DOWNSTREAM(MODIFIER||69||401|CG32195|protein_coding|CODING|FBtr0333696||1);DOWNSTREAM(MODIFIER||69||401|CG32195|protein_coding|CODING|FBtr0333697||1);INTRON(MODIFIER||||357|CG7341|protein_coding|CODING|FBtr0075124|1|1);INTRON(MODIFI…	-
FBgn0028646	3R_26274796_SNP	A	G	0.08571	15	160	2.2e-07	0.0230704	SiteClass[FBgn0028646|aralar1|SYNONYMOUS_CODING|0],TranscriptAnnot[SYNONYMOUS_CODING(LOW|SILENT|gaC/gaT|D105|694|aralar1|protein_coding|CODING|FBtr0330290|3|1);SYNONYMOUS_CODING(LOW|SILENT|gaC/gaT|D105|682|aralar1|protein_coding|CODING|FBtr0085695|3|1);SYNONYMOUS_CODING(LOW|SILENT|gaC/gaT|D105|682|aralar1|protein_coding|CODING|FBtr0085694|3|1);SYNONYMOUS_CODING(LOW|SILENT|gaC/gaT|D102|679|aralar1…	The gene aralar1 is referred to in FlyBase by the symbol Dmel\aralar1 (CG2139, FBgn0028646). It is a protein_coding_gene from Drosophila melanogaster. It has 6 annotated transcripts and 6 polypeptides (5 unique). Gene sequence location is 3R:30445635..30455867. It has the cytological map location 99F4-99F5. Protein features are: EF-hand domain; EF-hand domain pair; Mitochondrial carrier domain; M…
FBtr0330290	3R_26274796_SNP	A	G	0.08571	15	160	2.2e-07	0.0230704	SiteClass[FBgn0028646|aralar1|SYNONYMOUS_CODING|0],TranscriptAnnot[SYNONYMOUS_CODING(LOW|SILENT|gaC/gaT|D105|694|aralar1|protein_coding|CODING|FBtr0330290|3|1);SYNONYMOUS_CODING(LOW|SILENT|gaC/gaT|D105|682|aralar1|protein_coding|CODING|FBtr0085695|3|1);SYNONYMOUS_CODING(LOW|SILENT|gaC/gaT|D105|682|aralar1|protein_coding|CODING|FBtr0085694|3|1);SYNONYMOUS_CODING(LOW|SILENT|gaC/gaT|D102|679|aralar1…	-
FBtr0085695	3R_26274796_SNP	A	G	0.08571	15	160	2.2e-07	0.0230704	SiteClass[FBgn0028646|aralar1|SYNONYMOUS_CODING|0],TranscriptAnnot[SYNONYMOUS_CODING(LOW|SILENT|gaC/gaT|D105|694|aralar1|protein_coding|CODING|FBtr0330290|3|1);SYNONYMOUS_CODING(LOW|SILENT|gaC/gaT|D105|682|aralar1|protein_coding|CODING|FBtr0085695|3|1);SYNONYMOUS_CODING(LOW|SILENT|gaC/gaT|D105|682|aralar1|protein_coding|CODING|FBtr0085694|3|1);SYNONYMOUS_CODING(LOW|SILENT|gaC/gaT|D102|679|aralar1…	-
FBtr0085694	3R_26274796_SNP	A	G	0.08571	15	160	2.2e-07	0.0230704	SiteClass[FBgn0028646|aralar1|SYNONYMOUS_CODING|0],TranscriptAnnot[SYNONYMOUS_CODING(LOW|SILENT|gaC/gaT|D105|694|aralar1|protein_coding|CODING|FBtr0330290|3|1);SYNONYMOUS_CODING(LOW|SILENT|gaC/gaT|D105|682|aralar1|protein_coding|CODING|FBtr0085695|3|1);SYNONYMOUS_CODING(LOW|SILENT|gaC/gaT|D105|682|aralar1|protein_coding|CODING|FBtr0085694|3|1);SYNONYMOUS_CODING(LOW|SILENT|gaC/gaT|D102|679|aralar1…	-
FBtr0085693	3R_26274796_SNP	A	G	0.08571	15	160	2.2e-07	0.0230704	SiteClass[FBgn0028646|aralar1|SYNONYMOUS_CODING|0],TranscriptAnnot[SYNONYMOUS_CODING(LOW|SILENT|gaC/gaT|D105|694|aralar1|protein_coding|CODING|FBtr0330290|3|1);SYNONYMOUS_CODING(LOW|SILENT|gaC/gaT|D105|682|aralar1|protein_coding|CODING|FBtr0085695|3|1);SYNONYMOUS_CODING(LOW|SILENT|gaC/gaT|D105|682|aralar1|protein_coding|CODING|FBtr0085694|3|1);SYNONYMOUS_CODING(LOW|SILENT|gaC/gaT|D102|679|aralar1…	-
FBtr0085692	3R_26274796_SNP	A	G	0.08571	15	160	2.2e-07	0.0230704	SiteClass[FBgn0028646|aralar1|SYNONYMOUS_CODING|0],TranscriptAnnot[SYNONYMOUS_CODING(LOW|SILENT|gaC/gaT|D105|694|aralar1|protein_coding|CODING|FBtr0330290|3|1);SYNONYMOUS_CODING(LOW|SILENT|gaC/gaT|D105|682|aralar1|protein_coding|CODING|FBtr0085695|3|1);SYNONYMOUS_CODING(LOW|SILENT|gaC/gaT|D105|682|aralar1|protein_coding|CODING|FBtr0085694|3|1);SYNONYMOUS_CODING(LOW|SILENT|gaC/gaT|D102|679|aralar1…	-
FBtr0306586	3R_26274796_SNP	A	G	0.08571	15	160	2.2e-07	0.0230704	SiteClass[FBgn0028646|aralar1|SYNONYMOUS_CODING|0],TranscriptAnnot[SYNONYMOUS_CODING(LOW|SILENT|gaC/gaT|D105|694|aralar1|protein_coding|CODING|FBtr0330290|3|1);SYNONYMOUS_CODING(LOW|SILENT|gaC/gaT|D105|682|aralar1|protein_coding|CODING|FBtr0085695|3|1);SYNONYMOUS_CODING(LOW|SILENT|gaC/gaT|D105|682|aralar1|protein_coding|CODING|FBtr0085694|3|1);SYNONYMOUS_CODING(LOW|SILENT|gaC/gaT|D102|679|aralar1…	-
FBgn0261928	3R_6077027_SNP	A	T	0.07229	12	154	2.2e-07	0.0230704	SiteClass[FBgn0261928|CG42795|DOWNSTREAM|28;FBgn0037801|CG3999|UPSTREAM|213],TranscriptAnnot[UPSTREAM(MODIFIER||213||985|CG3999|protein_coding|CODING|FBtr0082225||1);UPSTREAM(MODIFIER||213||985|CG3999|protein_coding|CODING|FBtr0337048||1);DOWNSTREAM(MODIFIER||28||2904|CG42795|protein_coding|CODING|FBtr0332437||1);DOWNSTREAM(MODIFIER||28||2928|CG42795|protein_coding|CODING|FBtr0345170||1);INTERGEN…	This gene is referred to in FlyBase by the symbol Dmel\CG42795 (FBgn0261928). It is a protein_coding_gene from Drosophila melanogaster. It has 6 annotated transcripts and 6 polypeptides (all unique). Gene sequence location is 3R:10225690..10251277. It has the cytological map location 86A1. Protein features are: Rab-GTPase-TBC domain; TBC1 domain family member 30, C-terminal. Its molecular functio…
FBgn0037801	3R_6077027_SNP	A	T	0.07229	12	154	2.2e-07	0.0230704	SiteClass[FBgn0261928|CG42795|DOWNSTREAM|28;FBgn0037801|CG3999|UPSTREAM|213],TranscriptAnnot[UPSTREAM(MODIFIER||213||985|CG3999|protein_coding|CODING|FBtr0082225||1);UPSTREAM(MODIFIER||213||985|CG3999|protein_coding|CODING|FBtr0337048||1);DOWNSTREAM(MODIFIER||28||2904|CG42795|protein_coding|CODING|FBtr0332437||1);DOWNSTREAM(MODIFIER||28||2928|CG42795|protein_coding|CODING|FBtr0345170||1);INTERGEN…	This gene is referred to in FlyBase by the symbol Dmel\CG3999 (FBgn0037801). It is a protein_coding_gene from Drosophila melanogaster. It has 2 annotated transcripts and 2 polypeptides (1 unique). Gene sequence location is 3R:10251518..10255268. It has the cytological map location 86A2. Protein features are: Glycine cleavage system P protein; Glycine cleavage system P-protein, N-terminal; Glycine…
FBtr0082225	3R_6077027_SNP	A	T	0.07229	12	154	2.2e-07	0.0230704	SiteClass[FBgn0261928|CG42795|DOWNSTREAM|28;FBgn0037801|CG3999|UPSTREAM|213],TranscriptAnnot[UPSTREAM(MODIFIER||213||985|CG3999|protein_coding|CODING|FBtr0082225||1);UPSTREAM(MODIFIER||213||985|CG3999|protein_coding|CODING|FBtr0337048||1);DOWNSTREAM(MODIFIER||28||2904|CG42795|protein_coding|CODING|FBtr0332437||1);DOWNSTREAM(MODIFIER||28||2928|CG42795|protein_coding|CODING|FBtr0345170||1);INTERGEN…	-
FBtr0337048	3R_6077027_SNP	A	T	0.07229	12	154	2.2e-07	0.0230704	SiteClass[FBgn0261928|CG42795|DOWNSTREAM|28;FBgn0037801|CG3999|UPSTREAM|213],TranscriptAnnot[UPSTREAM(MODIFIER||213||985|CG3999|protein_coding|CODING|FBtr0082225||1);UPSTREAM(MODIFIER||213||985|CG3999|protein_coding|CODING|FBtr0337048||1);DOWNSTREAM(MODIFIER||28||2904|CG42795|protein_coding|CODING|FBtr0332437||1);DOWNSTREAM(MODIFIER||28||2928|CG42795|protein_coding|CODING|FBtr0345170||1);INTERGEN…	-
FBtr0332437	3R_6077027_SNP	A	T	0.07229	12	154	2.2e-07	0.0230704	SiteClass[FBgn0261928|CG42795|DOWNSTREAM|28;FBgn0037801|CG3999|UPSTREAM|213],TranscriptAnnot[UPSTREAM(MODIFIER||213||985|CG3999|protein_coding|CODING|FBtr0082225||1);UPSTREAM(MODIFIER||213||985|CG3999|protein_coding|CODING|FBtr0337048||1);DOWNSTREAM(MODIFIER||28||2904|CG42795|protein_coding|CODING|FBtr0332437||1);DOWNSTREAM(MODIFIER||28||2928|CG42795|protein_coding|CODING|FBtr0345170||1);INTERGEN…	-
FBtr0345170	3R_6077027_SNP	A	T	0.07229	12	154	2.2e-07	0.0230704	SiteClass[FBgn0261928|CG42795|DOWNSTREAM|28;FBgn0037801|CG3999|UPSTREAM|213],TranscriptAnnot[UPSTREAM(MODIFIER||213||985|CG3999|protein_coding|CODING|FBtr0082225||1);UPSTREAM(MODIFIER||213||985|CG3999|protein_coding|CODING|FBtr0337048||1);DOWNSTREAM(MODIFIER||28||2904|CG42795|protein_coding|CODING|FBtr0332437||1);DOWNSTREAM(MODIFIER||28||2928|CG42795|protein_coding|CODING|FBtr0345170||1);INTERGEN…	-
FBgn0086450	X_9095119_SNP	G	T	0.1445	25	148	2.71e-07	0.0250172	SiteClass[FBgn0086450|su_r_|INTRON|0],TranscriptAnnot[INTRON(MODIFIER||||1031|su_r_|protein_coding|CODING|FBtr0071338|1|1)]	The gene suppressor of rudimentary is referred to in FlyBase by the symbol Dmel\su(r) (CG2194, FBgn0086450). It is a protein_coding_gene from Drosophila melanogaster. It has one annotated transcript and one polypeptide. Gene sequence location is X:9196808..9201820. It has the cytological map location 8D1. Protein features are: 4Fe-4S ferredoxin, iron-sulphur binding, conserved site; 4Fe-4S ferred…
FBtr0071338	X_9095119_SNP	G	T	0.1445	25	148	2.71e-07	0.0250172	SiteClass[FBgn0086450|su_r_|INTRON|0],TranscriptAnnot[INTRON(MODIFIER||||1031|su_r_|protein_coding|CODING|FBtr0071338|1|1)]	-
FBgn0051321	3R_10136726_SNP	A	G	0.05848	10	161	2.79e-07	0.0250172	SiteClass[FBgn0051321|CG31321|INTRON|0;FBgn0004855|RpII15|DOWNSTREAM|826],TranscriptAnnot[DOWNSTREAM(MODIFIER||826||129|RpII15|protein_coding|CODING|FBtr0346348||1);INTRON(MODIFIER||||601|CG31321|protein_coding|CODING|FBtr0082926|1|1)]	This gene is referred to in FlyBase by the symbol Dmel\CG31321 (FBgn0051321). It is a protein_coding_gene from Drosophila melanogaster. It has one annotated transcript and one polypeptide. Gene sequence location is 3R:14310362..14314412. It has the cytological map location 88B3. Protein features are: Major facilitator superfamily; Major facilitator superfamily domain. Its molecular function is de…
FBgn0004855	3R_10136726_SNP	A	G	0.05848	10	161	2.79e-07	0.0250172	SiteClass[FBgn0051321|CG31321|INTRON|0;FBgn0004855|RpII15|DOWNSTREAM|826],TranscriptAnnot[DOWNSTREAM(MODIFIER||826||129|RpII15|protein_coding|CODING|FBtr0346348||1);INTRON(MODIFIER||||601|CG31321|protein_coding|CODING|FBtr0082926|1|1)]	The gene RNA polymerase II 15kD subunit is referred to in FlyBase by the symbol Dmel\RpII15 (CG3284, FBgn0004855). It is a protein_coding_gene from Drosophila melanogaster. It has 3 annotated transcripts and 3 polypeptides (1 unique). Gene sequence location is 3R:14309089..14310178. It has the cytological map location 88B3. Protein features are: DNA-directed RNA polymerase M, 15kDa subunit, conse…
FBtr0346348	3R_10136726_SNP	A	G	0.05848	10	161	2.79e-07	0.0250172	SiteClass[FBgn0051321|CG31321|INTRON|0;FBgn0004855|RpII15|DOWNSTREAM|826],TranscriptAnnot[DOWNSTREAM(MODIFIER||826||129|RpII15|protein_coding|CODING|FBtr0346348||1);INTRON(MODIFIER||||601|CG31321|protein_coding|CODING|FBtr0082926|1|1)]	-
FBtr0082926	3R_10136726_SNP	A	G	0.05848	10	161	2.79e-07	0.0250172	SiteClass[FBgn0051321|CG31321|INTRON|0;FBgn0004855|RpII15|DOWNSTREAM|826],TranscriptAnnot[DOWNSTREAM(MODIFIER||826||129|RpII15|protein_coding|CODING|FBtr0346348||1);INTRON(MODIFIER||||601|CG31321|protein_coding|CODING|FBtr0082926|1|1)]	-
FBgn0036993	3L_20440203_SNP	A	G	0.05714	10	165	3.07e-07	0.0254693	SiteClass[FBgn0036993|CG5910|INTRON|0],TranscriptAnnot[INTRON(MODIFIER||||251|CG5910|protein_coding|CODING|FBtr0078195|4|1);INTRON(MODIFIER||||251|CG5910|protein_coding|CODING|FBtr0300411|4|1)]	This gene is referred to in FlyBase by the symbol Dmel\CG5910 (FBgn0036993). It is a protein_coding_gene from Drosophila melanogaster. It has 2 annotated transcripts and 2 polypeptides (1 unique). Gene sequence location is 3L:20442419..20450580. It has the cytological map location 77C3. Its molecular function is unknown. The biological processes in which it is involved are not known. 10 alleles a…
FBtr0078195	3L_20440203_SNP	A	G	0.05714	10	165	3.07e-07	0.0254693	SiteClass[FBgn0036993|CG5910|INTRON|0],TranscriptAnnot[INTRON(MODIFIER||||251|CG5910|protein_coding|CODING|FBtr0078195|4|1);INTRON(MODIFIER||||251|CG5910|protein_coding|CODING|FBtr0300411|4|1)]	-
FBtr0300411	3L_20440203_SNP	A	G	0.05714	10	165	3.07e-07	0.0254693	SiteClass[FBgn0036993|CG5910|INTRON|0],TranscriptAnnot[INTRON(MODIFIER||||251|CG5910|protein_coding|CODING|FBtr0078195|4|1);INTRON(MODIFIER||||251|CG5910|protein_coding|CODING|FBtr0300411|4|1)]	-
FBgn0067782	3R_16379386_SNP	T	C	0.07784	13	154	3.64e-07	0.0278828	SiteClass[FBgn0067782|att-ORFB|NON_SYNONYMOUS_CODING|0;FBgn0067783|att-ORFA|SYNONYMOUS_CODING|0],TranscriptAnnot[NON_SYNONYMOUS_CODING(MODERATE|MISSENSE|Gct/Act|A172T|197|att-ORFB|protein_coding|CODING|FBtr0090034|3|1);SYNONYMOUS_CODING(LOW|SILENT|acG/acA|T223|365|att-ORFA|protein_coding|CODING|FBtr0344282|5|1);SYNONYMOUS_CODING(LOW|SILENT|acG/acA|T148|290|att-ORFA|protein_coding|CODING|FBtr03442…	The gene alternative testis transcripts open reading frame B is referred to in FlyBase by the symbol Dmel\att-ORFB (CG33488, FBgn0067782). It is a protein_coding_gene from Drosophila melanogaster. It has one annotated transcript and one polypeptide. Gene sequence location is 3R:20552635..20554400. It has the cytological map location 92F1. Its molecular function is described by: . It is involved i…
FBgn0067783	3R_16379386_SNP	T	C	0.07784	13	154	3.64e-07	0.0278828	SiteClass[FBgn0067782|att-ORFB|NON_SYNONYMOUS_CODING|0;FBgn0067783|att-ORFA|SYNONYMOUS_CODING|0],TranscriptAnnot[NON_SYNONYMOUS_CODING(MODERATE|MISSENSE|Gct/Act|A172T|197|att-ORFB|protein_coding|CODING|FBtr0090034|3|1);SYNONYMOUS_CODING(LOW|SILENT|acG/acA|T223|365|att-ORFA|protein_coding|CODING|FBtr0344282|5|1);SYNONYMOUS_CODING(LOW|SILENT|acG/acA|T148|290|att-ORFA|protein_coding|CODING|FBtr03442…	The gene alternative testis transcripts open reading frame A is referred to in FlyBase by the symbol Dmel\att-ORFA (CG4241, FBgn0067783). It is a protein_coding_gene from Drosophila melanogaster. It has 6 annotated transcripts and 6 polypeptides (3 unique). Gene sequence location is 3R:20552385..20557667. It has the cytological map location 92F1. Protein features are: Graves disease carrier prote…
FBtr0090034	3R_16379386_SNP	T	C	0.07784	13	154	3.64e-07	0.0278828	SiteClass[FBgn0067782|att-ORFB|NON_SYNONYMOUS_CODING|0;FBgn0067783|att-ORFA|SYNONYMOUS_CODING|0],TranscriptAnnot[NON_SYNONYMOUS_CODING(MODERATE|MISSENSE|Gct/Act|A172T|197|att-ORFB|protein_coding|CODING|FBtr0090034|3|1);SYNONYMOUS_CODING(LOW|SILENT|acG/acA|T223|365|att-ORFA|protein_coding|CODING|FBtr0344282|5|1);SYNONYMOUS_CODING(LOW|SILENT|acG/acA|T148|290|att-ORFA|protein_coding|CODING|FBtr03442…	-
FBtr0344282	3R_16379386_SNP	T	C	0.07784	13	154	3.64e-07	0.0278828	SiteClass[FBgn0067782|att-ORFB|NON_SYNONYMOUS_CODING|0;FBgn0067783|att-ORFA|SYNONYMOUS_CODING|0],TranscriptAnnot[NON_SYNONYMOUS_CODING(MODERATE|MISSENSE|Gct/Act|A172T|197|att-ORFB|protein_coding|CODING|FBtr0090034|3|1);SYNONYMOUS_CODING(LOW|SILENT|acG/acA|T223|365|att-ORFA|protein_coding|CODING|FBtr0344282|5|1);SYNONYMOUS_CODING(LOW|SILENT|acG/acA|T148|290|att-ORFA|protein_coding|CODING|FBtr03442…	-
FBtr0344281	3R_16379386_SNP	T	C	0.07784	13	154	3.64e-07	0.0278828	SiteClass[FBgn0067782|att-ORFB|NON_SYNONYMOUS_CODING|0;FBgn0067783|att-ORFA|SYNONYMOUS_CODING|0],TranscriptAnnot[NON_SYNONYMOUS_CODING(MODERATE|MISSENSE|Gct/Act|A172T|197|att-ORFB|protein_coding|CODING|FBtr0090034|3|1);SYNONYMOUS_CODING(LOW|SILENT|acG/acA|T223|365|att-ORFA|protein_coding|CODING|FBtr0344282|5|1);SYNONYMOUS_CODING(LOW|SILENT|acG/acA|T148|290|att-ORFA|protein_coding|CODING|FBtr03442…	-
FBtr0344280	3R_16379386_SNP	T	C	0.07784	13	154	3.64e-07	0.0278828	SiteClass[FBgn0067782|att-ORFB|NON_SYNONYMOUS_CODING|0;FBgn0067783|att-ORFA|SYNONYMOUS_CODING|0],TranscriptAnnot[NON_SYNONYMOUS_CODING(MODERATE|MISSENSE|Gct/Act|A172T|197|att-ORFB|protein_coding|CODING|FBtr0090034|3|1);SYNONYMOUS_CODING(LOW|SILENT|acG/acA|T223|365|att-ORFA|protein_coding|CODING|FBtr0344282|5|1);SYNONYMOUS_CODING(LOW|SILENT|acG/acA|T148|290|att-ORFA|protein_coding|CODING|FBtr03442…	-
FBtr0089482	3R_16379386_SNP	T	C	0.07784	13	154	3.64e-07	0.0278828	SiteClass[FBgn0067782|att-ORFB|NON_SYNONYMOUS_CODING|0;FBgn0067783|att-ORFA|SYNONYMOUS_CODING|0],TranscriptAnnot[NON_SYNONYMOUS_CODING(MODERATE|MISSENSE|Gct/Act|A172T|197|att-ORFB|protein_coding|CODING|FBtr0090034|3|1);SYNONYMOUS_CODING(LOW|SILENT|acG/acA|T223|365|att-ORFA|protein_coding|CODING|FBtr0344282|5|1);SYNONYMOUS_CODING(LOW|SILENT|acG/acA|T148|290|att-ORFA|protein_coding|CODING|FBtr03442…	-
FBtr0089481	3R_16379386_SNP	T	C	0.07784	13	154	3.64e-07	0.0278828	SiteClass[FBgn0067782|att-ORFB|NON_SYNONYMOUS_CODING|0;FBgn0067783|att-ORFA|SYNONYMOUS_CODING|0],TranscriptAnnot[NON_SYNONYMOUS_CODING(MODERATE|MISSENSE|Gct/Act|A172T|197|att-ORFB|protein_coding|CODING|FBtr0090034|3|1);SYNONYMOUS_CODING(LOW|SILENT|acG/acA|T223|365|att-ORFA|protein_coding|CODING|FBtr0344282|5|1);SYNONYMOUS_CODING(LOW|SILENT|acG/acA|T148|290|att-ORFA|protein_coding|CODING|FBtr03442…	-
FBtr0089480	3R_16379386_SNP	T	C	0.07784	13	154	3.64e-07	0.0278828	SiteClass[FBgn0067782|att-ORFB|NON_SYNONYMOUS_CODING|0;FBgn0067783|att-ORFA|SYNONYMOUS_CODING|0],TranscriptAnnot[NON_SYNONYMOUS_CODING(MODERATE|MISSENSE|Gct/Act|A172T|197|att-ORFB|protein_coding|CODING|FBtr0090034|3|1);SYNONYMOUS_CODING(LOW|SILENT|acG/acA|T223|365|att-ORFA|protein_coding|CODING|FBtr0344282|5|1);SYNONYMOUS_CODING(LOW|SILENT|acG/acA|T148|290|att-ORFA|protein_coding|CODING|FBtr03442…	-
FBgn0266418	3R_18471412_SNP	G	C	0.0578	10	163	3.79e-07	0.0279324	SiteClass[FBgn0266418|CG45058|INTRON|0],TranscriptAnnot[INTRON(MODIFIER||||1648|CG45058|protein_coding|CODING|FBtr0344408|1|1);INTRON(MODIFIER||||1403|CG45058|protein_coding|CODING|FBtr0344409|1|1)]	The gene wide awake is referred to in FlyBase by the symbol Dmel\wake (CG45058, FBgn0266418). It is a protein_coding_gene from Drosophila melanogaster. It has 7 annotated transcripts and 7 polypeptides (5 unique). Gene sequence location is 3R:22639808..22683827. It has the cytological map location 94B8-94B11. Protein features are: Ankyrin repeat; Ankyrin repeat-containing domain; Fibronectin type…
FBtr0344408	3R_18471412_SNP	G	C	0.0578	10	163	3.79e-07	0.0279324	SiteClass[FBgn0266418|CG45058|INTRON|0],TranscriptAnnot[INTRON(MODIFIER||||1648|CG45058|protein_coding|CODING|FBtr0344408|1|1);INTRON(MODIFIER||||1403|CG45058|protein_coding|CODING|FBtr0344409|1|1)]	-
FBtr0344409	3R_18471412_SNP	G	C	0.0578	10	163	3.79e-07	0.0279324	SiteClass[FBgn0266418|CG45058|INTRON|0],TranscriptAnnot[INTRON(MODIFIER||||1648|CG45058|protein_coding|CODING|FBtr0344408|1|1);INTRON(MODIFIER||||1403|CG45058|protein_coding|CODING|FBtr0344409|1|1)]	-
FBgn0035574	3L_4716606_SNP	C	A	0.05028	9	170	3.96e-07	0.0281188	SiteClass[FBgn0035574|RhoGEF64C|INTRON|0],TranscriptAnnot[INTRON(MODIFIER||||1984|RhoGEF64C|protein_coding|CODING|FBtr0073345|2|1);INTRON(MODIFIER||||1984|RhoGEF64C|protein_coding|CODING|FBtr0332738|2|1)]	The gene Rho guanine nucleotide exchange factor at 64C is referred to in FlyBase by the symbol Dmel\RhoGEF64C (CG32239, FBgn0035574). It is a protein_coding_gene from Drosophila melanogaster. It has 2 annotated transcripts and 2 polypeptides (1 unique). Gene sequence location is 3L:4692783..4796253. It has the cytological map location 64B13-64B17. Protein features are: Dbl homology (DH) domain; P…
FBtr0073345	3L_4716606_SNP	C	A	0.05028	9	170	3.96e-07	0.0281188	SiteClass[FBgn0035574|RhoGEF64C|INTRON|0],TranscriptAnnot[INTRON(MODIFIER||||1984|RhoGEF64C|protein_coding|CODING|FBtr0073345|2|1);INTRON(MODIFIER||||1984|RhoGEF64C|protein_coding|CODING|FBtr0332738|2|1)]	-
FBtr0332738	3L_4716606_SNP	C	A	0.05028	9	170	3.96e-07	0.0281188	SiteClass[FBgn0035574|RhoGEF64C|INTRON|0],TranscriptAnnot[INTRON(MODIFIER||||1984|RhoGEF64C|protein_coding|CODING|FBtr0073345|2|1);INTRON(MODIFIER||||1984|RhoGEF64C|protein_coding|CODING|FBtr0332738|2|1)]	-
FBgn0036777	3L_18109193_DEL	A	AA	0.1353	23	147	4.31e-07	0.0295285	SiteClass[FBgn0036777|CG7341|INTRON|0;FBgn0052195|CG32195|DOWNSTREAM|119],TranscriptAnnot[UTR_3_PRIME(MODIFIER||334||401|CG32195|protein_coding|CODING|FBtr0075125|4|1);DOWNSTREAM(MODIFIER||119||401|CG32195|protein_coding|CODING|FBtr0333696||1);DOWNSTREAM(MODIFIER||119||401|CG32195|protein_coding|CODING|FBtr0333697||1);INTRON(MODIFIER||||357|CG7341|protein_coding|CODING|FBtr0075124|1|1);INTRON(MOD…	This gene is referred to in FlyBase by the symbol Dmel\CG7341 (FBgn0036777). It is a protein_coding_gene from Drosophila melanogaster. It has 2 annotated transcripts and 2 polypeptides (1 unique). Gene sequence location is 3L:18112959..18121003. It has the cytological map location 75B10. Its molecular function is unknown. The biological processes in which it is involved are not known. 7 alleles a…
FBgn0052195	3L_18109193_DEL	A	AA	0.1353	23	147	4.31e-07	0.0295285	SiteClass[FBgn0036777|CG7341|INTRON|0;FBgn0052195|CG32195|DOWNSTREAM|119],TranscriptAnnot[UTR_3_PRIME(MODIFIER||334||401|CG32195|protein_coding|CODING|FBtr0075125|4|1);DOWNSTREAM(MODIFIER||119||401|CG32195|protein_coding|CODING|FBtr0333696||1);DOWNSTREAM(MODIFIER||119||401|CG32195|protein_coding|CODING|FBtr0333697||1);INTRON(MODIFIER||||357|CG7341|protein_coding|CODING|FBtr0075124|1|1);INTRON(MOD…	This gene is referred to in FlyBase by the symbol Dmel\CG32195 (FBgn0052195). It is a protein_coding_gene from Drosophila melanogaster. It has 3 annotated transcripts and 3 polypeptides (1 unique). Gene sequence location is 3L:18112959..18119150. It has the cytological map location 75B10. Protein features are: CHK kinase-like; Protein kinase-like domain; Protein of unknown function DUF227. Its mo…
FBtr0075125	3L_18109193_DEL	A	AA	0.1353	23	147	4.31e-07	0.0295285	SiteClass[FBgn0036777|CG7341|INTRON|0;FBgn0052195|CG32195|DOWNSTREAM|119],TranscriptAnnot[UTR_3_PRIME(MODIFIER||334||401|CG32195|protein_coding|CODING|FBtr0075125|4|1);DOWNSTREAM(MODIFIER||119||401|CG32195|protein_coding|CODING|FBtr0333696||1);DOWNSTREAM(MODIFIER||119||401|CG32195|protein_coding|CODING|FBtr0333697||1);INTRON(MODIFIER||||357|CG7341|protein_coding|CODING|FBtr0075124|1|1);INTRON(MOD…	-
FBtr0333696	3L_18109193_DEL	A	AA	0.1353	23	147	4.31e-07	0.0295285	SiteClass[FBgn0036777|CG7341|INTRON|0;FBgn0052195|CG32195|DOWNSTREAM|119],TranscriptAnnot[UTR_3_PRIME(MODIFIER||334||401|CG32195|protein_coding|CODING|FBtr0075125|4|1);DOWNSTREAM(MODIFIER||119||401|CG32195|protein_coding|CODING|FBtr0333696||1);DOWNSTREAM(MODIFIER||119||401|CG32195|protein_coding|CODING|FBtr0333697||1);INTRON(MODIFIER||||357|CG7341|protein_coding|CODING|FBtr0075124|1|1);INTRON(MOD…	-
FBtr0333697	3L_18109193_DEL	A	AA	0.1353	23	147	4.31e-07	0.0295285	SiteClass[FBgn0036777|CG7341|INTRON|0;FBgn0052195|CG32195|DOWNSTREAM|119],TranscriptAnnot[UTR_3_PRIME(MODIFIER||334||401|CG32195|protein_coding|CODING|FBtr0075125|4|1);DOWNSTREAM(MODIFIER||119||401|CG32195|protein_coding|CODING|FBtr0333696||1);DOWNSTREAM(MODIFIER||119||401|CG32195|protein_coding|CODING|FBtr0333697||1);INTRON(MODIFIER||||357|CG7341|protein_coding|CODING|FBtr0075124|1|1);INTRON(MOD…	-
FBtr0075124	3L_18109193_DEL	A	AA	0.1353	23	147	4.31e-07	0.0295285	SiteClass[FBgn0036777|CG7341|INTRON|0;FBgn0052195|CG32195|DOWNSTREAM|119],TranscriptAnnot[UTR_3_PRIME(MODIFIER||334||401|CG32195|protein_coding|CODING|FBtr0075125|4|1);DOWNSTREAM(MODIFIER||119||401|CG32195|protein_coding|CODING|FBtr0333696||1);DOWNSTREAM(MODIFIER||119||401|CG32195|protein_coding|CODING|FBtr0333697||1);INTRON(MODIFIER||||357|CG7341|protein_coding|CODING|FBtr0075124|1|1);INTRON(MOD…	-
FBtr0075123	3L_18109193_DEL	A	AA	0.1353	23	147	4.31e-07	0.0295285	SiteClass[FBgn0036777|CG7341|INTRON|0;FBgn0052195|CG32195|DOWNSTREAM|119],TranscriptAnnot[UTR_3_PRIME(MODIFIER||334||401|CG32195|protein_coding|CODING|FBtr0075125|4|1);DOWNSTREAM(MODIFIER||119||401|CG32195|protein_coding|CODING|FBtr0333696||1);DOWNSTREAM(MODIFIER||119||401|CG32195|protein_coding|CODING|FBtr0333697||1);INTRON(MODIFIER||||357|CG7341|protein_coding|CODING|FBtr0075124|1|1);INTRON(MOD…	-
FBgn0265982	2R_18562127_SNP	A	T	0.07303	13	165	5.12e-07	0.0338224	SiteClass[FBgn0265982|CR44761|UPSTREAM|927],TranscriptAnnot[UPSTREAM(MODIFIER||927|||CR44761|ncRNA|NON_CODING|FBtr0343004||1);INTERGENIC(MODIFIER||||||||||1)]	This gene is referred to in FlyBase by the symbol Dmel\CR44761 (FBgn0265982). It is a non_protein_coding_gene from Drosophila melanogaster. It has one annotated transcript. Gene sequence location is 2R:22673195..22673695. It has the cytological map location 58F7. Its molecular function is unknown. The biological processes in which it is involved are not known. No alleles are reported.
FBtr0343004	2R_18562127_SNP	A	T	0.07303	13	165	5.12e-07	0.0338224	SiteClass[FBgn0265982|CR44761|UPSTREAM|927],TranscriptAnnot[UPSTREAM(MODIFIER||927|||CR44761|ncRNA|NON_CODING|FBtr0343004||1);INTERGENIC(MODIFIER||||||||||1)]	-
FBgn0265982	2R_18562038_SNP	A	G	0.07263	13	166	7.66e-07	0.0483292	SiteClass[FBgn0265982|CR44761|UPSTREAM|838],TranscriptAnnot[UPSTREAM(MODIFIER||838|||CR44761|ncRNA|NON_CODING|FBtr0343004||1);INTERGENIC(MODIFIER||||||||||1)]	This gene is referred to in FlyBase by the symbol Dmel\CR44761 (FBgn0265982). It is a non_protein_coding_gene from Drosophila melanogaster. It has one annotated transcript. Gene sequence location is 2R:22673195..22673695. It has the cytological map location 58F7. Its molecular function is unknown. The biological processes in which it is involved are not known. No alleles are reported.
FBtr0343004	2R_18562038_SNP	A	G	0.07263	13	166	7.66e-07	0.0483292	SiteClass[FBgn0265982|CR44761|UPSTREAM|838],TranscriptAnnot[UPSTREAM(MODIFIER||838|||CR44761|ncRNA|NON_CODING|FBtr0343004||1);INTERGENIC(MODIFIER||||||||||1)]	-
FBgn0038679	3R_14938112_SNP	G	A	0.07386	13	163	8.48e-07	0.0483292	SiteClass[FBgn0038679|CG6040|INTRON|0],TranscriptAnnot[INTRON(MODIFIER||||1784|CG6040|protein_coding|CODING|FBtr0083729|1|1)]	This gene is referred to in FlyBase by the symbol Dmel\CG6040 (FBgn0038679). It is a protein_coding_gene from Drosophila melanogaster. It has one annotated transcript and one polypeptide. Gene sequence location is 3R:19096961..19131929. It has the cytological map location 91F1-91F2. Its molecular function is unknown. The biological processes in which it is involved are not known. 6 alleles are re…
FBtr0083729	3R_14938112_SNP	G	A	0.07386	13	163	8.48e-07	0.0483292	SiteClass[FBgn0038679|CG6040|INTRON|0],TranscriptAnnot[INTRON(MODIFIER||||1784|CG6040|protein_coding|CODING|FBtr0083729|1|1)]	-
FBgn0264598	X_2266612_SNP	T	A	0.3503	62	115	9.1e-07	0.0483292	SiteClass[FBgn0264598|PsGEF|INTRON|0],TranscriptAnnot[UTR_3_PRIME(MODIFIER||1432||1403|PsGEF|protein_coding|CODING|FBtr0333533|10|1);INTRON(MODIFIER||||2006|PsGEF|protein_coding|CODING|FBtr0333532|10|1);INTRON(MODIFIER||||2738|PsGEF|protein_coding|CODING|FBtr0333530|10|1);INTRON(MODIFIER||||2033|PsGEF|protein_coding|CODING|FBtr0333531|10|1);INTRON(MODIFIER||||2777|PsGEF|protein_coding|CODING|FBtr…	The gene Protostome-specific GEF is referred to in FlyBase by the symbol Dmel\PsGEF (CG43947, FBgn0264598). It is a protein_coding_gene from Drosophila melanogaster. It has 8 annotated transcripts and 8 polypeptides (all unique). Gene sequence location is X:2367121..2387664. It has the cytological map location 3A2. Protein features are: C2 domain; Dbl homology (DH) domain; PDZ domain; PH domain-l…
FBtr0333533	X_2266612_SNP	T	A	0.3503	62	115	9.1e-07	0.0483292	SiteClass[FBgn0264598|PsGEF|INTRON|0],TranscriptAnnot[UTR_3_PRIME(MODIFIER||1432||1403|PsGEF|protein_coding|CODING|FBtr0333533|10|1);INTRON(MODIFIER||||2006|PsGEF|protein_coding|CODING|FBtr0333532|10|1);INTRON(MODIFIER||||2738|PsGEF|protein_coding|CODING|FBtr0333530|10|1);INTRON(MODIFIER||||2033|PsGEF|protein_coding|CODING|FBtr0333531|10|1);INTRON(MODIFIER||||2777|PsGEF|protein_coding|CODING|FBtr…	-
FBtr0333532	X_2266612_SNP	T	A	0.3503	62	115	9.1e-07	0.0483292	SiteClass[FBgn0264598|PsGEF|INTRON|0],TranscriptAnnot[UTR_3_PRIME(MODIFIER||1432||1403|PsGEF|protein_coding|CODING|FBtr0333533|10|1);INTRON(MODIFIER||||2006|PsGEF|protein_coding|CODING|FBtr0333532|10|1);INTRON(MODIFIER||||2738|PsGEF|protein_coding|CODING|FBtr0333530|10|1);INTRON(MODIFIER||||2033|PsGEF|protein_coding|CODING|FBtr0333531|10|1);INTRON(MODIFIER||||2777|PsGEF|protein_coding|CODING|FBtr…	-
FBtr0333530	X_2266612_SNP	T	A	0.3503	62	115	9.1e-07	0.0483292	SiteClass[FBgn0264598|PsGEF|INTRON|0],TranscriptAnnot[UTR_3_PRIME(MODIFIER||1432||1403|PsGEF|protein_coding|CODING|FBtr0333533|10|1);INTRON(MODIFIER||||2006|PsGEF|protein_coding|CODING|FBtr0333532|10|1);INTRON(MODIFIER||||2738|PsGEF|protein_coding|CODING|FBtr0333530|10|1);INTRON(MODIFIER||||2033|PsGEF|protein_coding|CODING|FBtr0333531|10|1);INTRON(MODIFIER||||2777|PsGEF|protein_coding|CODING|FBtr…	-
FBtr0333531	X_2266612_SNP	T	A	0.3503	62	115	9.1e-07	0.0483292	SiteClass[FBgn0264598|PsGEF|INTRON|0],TranscriptAnnot[UTR_3_PRIME(MODIFIER||1432||1403|PsGEF|protein_coding|CODING|FBtr0333533|10|1);INTRON(MODIFIER||||2006|PsGEF|protein_coding|CODING|FBtr0333532|10|1);INTRON(MODIFIER||||2738|PsGEF|protein_coding|CODING|FBtr0333530|10|1);INTRON(MODIFIER||||2033|PsGEF|protein_coding|CODING|FBtr0333531|10|1);INTRON(MODIFIER||||2777|PsGEF|protein_coding|CODING|FBtr…	-
FBtr0333529	X_2266612_SNP	T	A	0.3503	62	115	9.1e-07	0.0483292	SiteClass[FBgn0264598|PsGEF|INTRON|0],TranscriptAnnot[UTR_3_PRIME(MODIFIER||1432||1403|PsGEF|protein_coding|CODING|FBtr0333533|10|1);INTRON(MODIFIER||||2006|PsGEF|protein_coding|CODING|FBtr0333532|10|1);INTRON(MODIFIER||||2738|PsGEF|protein_coding|CODING|FBtr0333530|10|1);INTRON(MODIFIER||||2033|PsGEF|protein_coding|CODING|FBtr0333531|10|1);INTRON(MODIFIER||||2777|PsGEF|protein_coding|CODING|FBtr…	-
FBgn0262617	3R_6102058_SNP	C	T	0.08187	14	157	9.3e-07	0.0483292	SiteClass[FBgn0262617|CG43143|INTRON|0],TranscriptAnnot[INTRON(MODIFIER||||1180|CG43143|protein_coding|CODING|FBtr0305351|1|1);INTRON(MODIFIER||||1427|CG43143|protein_coding|CODING|FBtr0305354|1|1);INTRON(MODIFIER||||1532|CG43143|protein_coding|CODING|FBtr0305356|1|1);INTRON(MODIFIER||||2556|CG43143|protein_coding|CODING|FBtr0337050|1|1)]	This gene is referred to in FlyBase by the symbol Dmel\CG43143 (FBgn0262617). It is a protein_coding_gene from Drosophila melanogaster. It has 9 annotated transcripts and 9 polypeptides (7 unique). Gene sequence location is 3R:10264306..10308467. It has the cytological map location 86A7. Protein features are: Protein kinase domain; Protein kinase, ATP binding site; Protein kinase-like domain; Ser…
FBtr0305351	3R_6102058_SNP	C	T	0.08187	14	157	9.3e-07	0.0483292	SiteClass[FBgn0262617|CG43143|INTRON|0],TranscriptAnnot[INTRON(MODIFIER||||1180|CG43143|protein_coding|CODING|FBtr0305351|1|1);INTRON(MODIFIER||||1427|CG43143|protein_coding|CODING|FBtr0305354|1|1);INTRON(MODIFIER||||1532|CG43143|protein_coding|CODING|FBtr0305356|1|1);INTRON(MODIFIER||||2556|CG43143|protein_coding|CODING|FBtr0337050|1|1)]	-
FBtr0305354	3R_6102058_SNP	C	T	0.08187	14	157	9.3e-07	0.0483292	SiteClass[FBgn0262617|CG43143|INTRON|0],TranscriptAnnot[INTRON(MODIFIER||||1180|CG43143|protein_coding|CODING|FBtr0305351|1|1);INTRON(MODIFIER||||1427|CG43143|protein_coding|CODING|FBtr0305354|1|1);INTRON(MODIFIER||||1532|CG43143|protein_coding|CODING|FBtr0305356|1|1);INTRON(MODIFIER||||2556|CG43143|protein_coding|CODING|FBtr0337050|1|1)]	-
FBtr0305356	3R_6102058_SNP	C	T	0.08187	14	157	9.3e-07	0.0483292	SiteClass[FBgn0262617|CG43143|INTRON|0],TranscriptAnnot[INTRON(MODIFIER||||1180|CG43143|protein_coding|CODING|FBtr0305351|1|1);INTRON(MODIFIER||||1427|CG43143|protein_coding|CODING|FBtr0305354|1|1);INTRON(MODIFIER||||1532|CG43143|protein_coding|CODING|FBtr0305356|1|1);INTRON(MODIFIER||||2556|CG43143|protein_coding|CODING|FBtr0337050|1|1)]	-
FBtr0337050	3R_6102058_SNP	C	T	0.08187	14	157	9.3e-07	0.0483292	SiteClass[FBgn0262617|CG43143|INTRON|0],TranscriptAnnot[INTRON(MODIFIER||||1180|CG43143|protein_coding|CODING|FBtr0305351|1|1);INTRON(MODIFIER||||1427|CG43143|protein_coding|CODING|FBtr0305354|1|1);INTRON(MODIFIER||||1532|CG43143|protein_coding|CODING|FBtr0305356|1|1);INTRON(MODIFIER||||2556|CG43143|protein_coding|CODING|FBtr0337050|1|1)]	-
FBgn0001404	X_2493261_SNP	T	G	0.06322	11	163	9.54e-07	0.0483292	SiteClass[FBgn0001404|egh|DOWNSTREAM|117;FBgn0011606|Klp3A|DOWNSTREAM|218],TranscriptAnnot[UTR_3_PRIME(MODIFIER||445||1212|Klp3A|protein_coding|CODING|FBtr0070448|6|1);DOWNSTREAM(MODIFIER||218||1212|Klp3A|protein_coding|CODING|FBtr0340093||1);DOWNSTREAM(MODIFIER||601||457|egh|protein_coding|CODING|FBtr0070439||1);DOWNSTREAM(MODIFIER||601||457|egh|protein_coding|CODING|FBtr0340091||1);DOWNSTREAM(M…	The gene egghead is referred to in FlyBase by the symbol Dmel\egh (CG9659, FBgn0001404). It is a protein_coding_gene from Drosophila melanogaster. It has 3 annotated transcripts and 3 polypeptides (1 unique). Gene sequence location is X:2588503..2599111. It has the cytological map location 3A6. Protein features are: Beta-1,4-mannosyltransferase Bre-3/Egh; Glycosyltransferase 2-like; Nucleotide-di…
FBgn0011606	X_2493261_SNP	T	G	0.06322	11	163	9.54e-07	0.0483292	SiteClass[FBgn0001404|egh|DOWNSTREAM|117;FBgn0011606|Klp3A|DOWNSTREAM|218],TranscriptAnnot[UTR_3_PRIME(MODIFIER||445||1212|Klp3A|protein_coding|CODING|FBtr0070448|6|1);DOWNSTREAM(MODIFIER||218||1212|Klp3A|protein_coding|CODING|FBtr0340093||1);DOWNSTREAM(MODIFIER||601||457|egh|protein_coding|CODING|FBtr0070439||1);DOWNSTREAM(MODIFIER||601||457|egh|protein_coding|CODING|FBtr0340091||1);DOWNSTREAM(M…	The gene Kinesin-like protein at 3A is referred to in FlyBase by the symbol Dmel\Klp3A (CG8590, FBgn0011606). It is a protein_coding_gene from Drosophila melanogaster. It has 2 annotated transcripts and 2 polypeptides (1 unique). Gene sequence location is X:2599158..2604052. It has the cytological map location 3A6. Protein features are: Kinesin motor domain; Kinesin motor domain, conserved site; …
FBtr0070448	X_2493261_SNP	T	G	0.06322	11	163	9.54e-07	0.0483292	SiteClass[FBgn0001404|egh|DOWNSTREAM|117;FBgn0011606|Klp3A|DOWNSTREAM|218],TranscriptAnnot[UTR_3_PRIME(MODIFIER||445||1212|Klp3A|protein_coding|CODING|FBtr0070448|6|1);DOWNSTREAM(MODIFIER||218||1212|Klp3A|protein_coding|CODING|FBtr0340093||1);DOWNSTREAM(MODIFIER||601||457|egh|protein_coding|CODING|FBtr0070439||1);DOWNSTREAM(MODIFIER||601||457|egh|protein_coding|CODING|FBtr0340091||1);DOWNSTREAM(M…	-
FBtr0340093	X_2493261_SNP	T	G	0.06322	11	163	9.54e-07	0.0483292	SiteClass[FBgn0001404|egh|DOWNSTREAM|117;FBgn0011606|Klp3A|DOWNSTREAM|218],TranscriptAnnot[UTR_3_PRIME(MODIFIER||445||1212|Klp3A|protein_coding|CODING|FBtr0070448|6|1);DOWNSTREAM(MODIFIER||218||1212|Klp3A|protein_coding|CODING|FBtr0340093||1);DOWNSTREAM(MODIFIER||601||457|egh|protein_coding|CODING|FBtr0070439||1);DOWNSTREAM(MODIFIER||601||457|egh|protein_coding|CODING|FBtr0340091||1);DOWNSTREAM(M…	-
FBtr0070439	X_2493261_SNP	T	G	0.06322	11	163	9.54e-07	0.0483292	SiteClass[FBgn0001404|egh|DOWNSTREAM|117;FBgn0011606|Klp3A|DOWNSTREAM|218],TranscriptAnnot[UTR_3_PRIME(MODIFIER||445||1212|Klp3A|protein_coding|CODING|FBtr0070448|6|1);DOWNSTREAM(MODIFIER||218||1212|Klp3A|protein_coding|CODING|FBtr0340093||1);DOWNSTREAM(MODIFIER||601||457|egh|protein_coding|CODING|FBtr0070439||1);DOWNSTREAM(MODIFIER||601||457|egh|protein_coding|CODING|FBtr0340091||1);DOWNSTREAM(M…	-
FBtr0340091	X_2493261_SNP	T	G	0.06322	11	163	9.54e-07	0.0483292	SiteClass[FBgn0001404|egh|DOWNSTREAM|117;FBgn0011606|Klp3A|DOWNSTREAM|218],TranscriptAnnot[UTR_3_PRIME(MODIFIER||445||1212|Klp3A|protein_coding|CODING|FBtr0070448|6|1);DOWNSTREAM(MODIFIER||218||1212|Klp3A|protein_coding|CODING|FBtr0340093||1);DOWNSTREAM(MODIFIER||601||457|egh|protein_coding|CODING|FBtr0070439||1);DOWNSTREAM(MODIFIER||601||457|egh|protein_coding|CODING|FBtr0340091||1);DOWNSTREAM(M…	-
FBtr0070440	X_2493261_SNP	T	G	0.06322	11	163	9.54e-07	0.0483292	SiteClass[FBgn0001404|egh|DOWNSTREAM|117;FBgn0011606|Klp3A|DOWNSTREAM|218],TranscriptAnnot[UTR_3_PRIME(MODIFIER||445||1212|Klp3A|protein_coding|CODING|FBtr0070448|6|1);DOWNSTREAM(MODIFIER||218||1212|Klp3A|protein_coding|CODING|FBtr0340093||1);DOWNSTREAM(MODIFIER||601||457|egh|protein_coding|CODING|FBtr0070439||1);DOWNSTREAM(MODIFIER||601||457|egh|protein_coding|CODING|FBtr0340091||1);DOWNSTREAM(M…	-
FBgn0266671	2R_14512955_SNP	T	C	0.1017	18	159	1.02e-06	0.0483292	SiteClass[FBgn0266671|Sec6|SYNONYMOUS_CODING|0;FBgn0034366|Atg7|UPSTREAM|406],TranscriptAnnot[SYNONYMOUS_CODING(LOW|SILENT|caC/caT|H36|738|Sec6|protein_coding|CODING|FBtr0086709|1|1);UPSTREAM(MODIFIER||406||510|Atg7|protein_coding|CODING|FBtr0086711||1);UPSTREAM(MODIFIER||406||684|Atg7|protein_coding|CODING|FBtr0086712||1)]	The gene Sec6 ortholog (S. cerevisiae) is referred to in FlyBase by the symbol Dmel\Sec6 (CG5341, FBgn0266671). It is a protein_coding_gene from Drosophila melanogaster. It has one annotated transcript and one polypeptide. Gene sequence location is 2R:18625249..18627718. It has the cytological map location 55E2. Protein features are: Exocyst complex component Sec6. Its molecular function is descr…
FBgn0034366	2R_14512955_SNP	T	C	0.1017	18	159	1.02e-06	0.0483292	SiteClass[FBgn0266671|Sec6|SYNONYMOUS_CODING|0;FBgn0034366|Atg7|UPSTREAM|406],TranscriptAnnot[SYNONYMOUS_CODING(LOW|SILENT|caC/caT|H36|738|Sec6|protein_coding|CODING|FBtr0086709|1|1);UPSTREAM(MODIFIER||406||510|Atg7|protein_coding|CODING|FBtr0086711||1);UPSTREAM(MODIFIER||406||684|Atg7|protein_coding|CODING|FBtr0086712||1)]	The gene Autophagy-related 7 is referred to in FlyBase by the symbol Dmel\Atg7 (CG5489, FBgn0034366). It is a protein_coding_gene from Drosophila melanogaster. It has 2 annotated transcripts and 2 polypeptides (all unique). Gene sequence location is 2R:18620466..18625044. It has the cytological map location 55E2. Protein features are: NAD(P)-binding domain; THIF-type NAD/FAD binding fold; Ubiquit…
FBtr0086709	2R_14512955_SNP	T	C	0.1017	18	159	1.02e-06	0.0483292	SiteClass[FBgn0266671|Sec6|SYNONYMOUS_CODING|0;FBgn0034366|Atg7|UPSTREAM|406],TranscriptAnnot[SYNONYMOUS_CODING(LOW|SILENT|caC/caT|H36|738|Sec6|protein_coding|CODING|FBtr0086709|1|1);UPSTREAM(MODIFIER||406||510|Atg7|protein_coding|CODING|FBtr0086711||1);UPSTREAM(MODIFIER||406||684|Atg7|protein_coding|CODING|FBtr0086712||1)]	-
FBtr0086711	2R_14512955_SNP	T	C	0.1017	18	159	1.02e-06	0.0483292	SiteClass[FBgn0266671|Sec6|SYNONYMOUS_CODING|0;FBgn0034366|Atg7|UPSTREAM|406],TranscriptAnnot[SYNONYMOUS_CODING(LOW|SILENT|caC/caT|H36|738|Sec6|protein_coding|CODING|FBtr0086709|1|1);UPSTREAM(MODIFIER||406||510|Atg7|protein_coding|CODING|FBtr0086711||1);UPSTREAM(MODIFIER||406||684|Atg7|protein_coding|CODING|FBtr0086712||1)]	-
FBtr0086712	2R_14512955_SNP	T	C	0.1017	18	159	1.02e-06	0.0483292	SiteClass[FBgn0266671|Sec6|SYNONYMOUS_CODING|0;FBgn0034366|Atg7|UPSTREAM|406],TranscriptAnnot[SYNONYMOUS_CODING(LOW|SILENT|caC/caT|H36|738|Sec6|protein_coding|CODING|FBtr0086709|1|1);UPSTREAM(MODIFIER||406||510|Atg7|protein_coding|CODING|FBtr0086711||1);UPSTREAM(MODIFIER||406||684|Atg7|protein_coding|CODING|FBtr0086712||1)]	-
FBgn0029870	X_6260049_SNP	G	A	0.05587	10	169	1.03e-06	0.0483292	SiteClass[FBgn0029870|Marf|START_GAINED|0;FBgn0003655|swa|UPSTREAM|308],TranscriptAnnot[START_GAINED(LOW||||810|Marf|protein_coding|CODING|FBtr0070909|1|1);START_GAINED(LOW||||814|Marf|protein_coding|CODING|FBtr0343373|1|1);START_GAINED(LOW||||810|Marf|protein_coding|CODING|FBtr0070910|1|1);UTR_5_PRIME(MODIFIER||841||810|Marf|protein_coding|CODING|FBtr0070909|1|1);UTR_5_PRIME(MODIFIER||841||814|M…	The gene Mitochondrial assembly regulatory factor is referred to in FlyBase by the symbol Dmel\Marf (CG3869, FBgn0029870). It is a protein_coding_gene from Drosophila melanogaster. It has 3 annotated transcripts and 3 polypeptides (2 unique). Gene sequence location is X:6365949..6370924. It has the cytological map location 5F4. Protein features are: Dynamin superfamily; Dynamin-type guanine nucle…
FBgn0003655	X_6260049_SNP	G	A	0.05587	10	169	1.03e-06	0.0483292	SiteClass[FBgn0029870|Marf|START_GAINED|0;FBgn0003655|swa|UPSTREAM|308],TranscriptAnnot[START_GAINED(LOW||||810|Marf|protein_coding|CODING|FBtr0070909|1|1);START_GAINED(LOW||||814|Marf|protein_coding|CODING|FBtr0343373|1|1);START_GAINED(LOW||||810|Marf|protein_coding|CODING|FBtr0070910|1|1);UTR_5_PRIME(MODIFIER||841||810|Marf|protein_coding|CODING|FBtr0070909|1|1);UTR_5_PRIME(MODIFIER||841||814|M…	The gene swallow is referred to in FlyBase by the symbol Dmel\swa (CG3429, FBgn0003655). It is a protein_coding_gene from Drosophila melanogaster. It has one annotated transcript and one polypeptide. Gene sequence location is X:6363418..6365708. It has the cytological map location 5F4. Its molecular function is described by: dynein binding; mRNA binding. It is involved in the biological process d…
FBtr0070909	X_6260049_SNP	G	A	0.05587	10	169	1.03e-06	0.0483292	SiteClass[FBgn0029870|Marf|START_GAINED|0;FBgn0003655|swa|UPSTREAM|308],TranscriptAnnot[START_GAINED(LOW||||810|Marf|protein_coding|CODING|FBtr0070909|1|1);START_GAINED(LOW||||814|Marf|protein_coding|CODING|FBtr0343373|1|1);START_GAINED(LOW||||810|Marf|protein_coding|CODING|FBtr0070910|1|1);UTR_5_PRIME(MODIFIER||841||810|Marf|protein_coding|CODING|FBtr0070909|1|1);UTR_5_PRIME(MODIFIER||841||814|M…	-
FBtr0343373	X_6260049_SNP	G	A	0.05587	10	169	1.03e-06	0.0483292	SiteClass[FBgn0029870|Marf|START_GAINED|0;FBgn0003655|swa|UPSTREAM|308],TranscriptAnnot[START_GAINED(LOW||||810|Marf|protein_coding|CODING|FBtr0070909|1|1);START_GAINED(LOW||||814|Marf|protein_coding|CODING|FBtr0343373|1|1);START_GAINED(LOW||||810|Marf|protein_coding|CODING|FBtr0070910|1|1);UTR_5_PRIME(MODIFIER||841||810|Marf|protein_coding|CODING|FBtr0070909|1|1);UTR_5_PRIME(MODIFIER||841||814|M…	-
FBtr0070910	X_6260049_SNP	G	A	0.05587	10	169	1.03e-06	0.0483292	SiteClass[FBgn0029870|Marf|START_GAINED|0;FBgn0003655|swa|UPSTREAM|308],TranscriptAnnot[START_GAINED(LOW||||810|Marf|protein_coding|CODING|FBtr0070909|1|1);START_GAINED(LOW||||814|Marf|protein_coding|CODING|FBtr0343373|1|1);START_GAINED(LOW||||810|Marf|protein_coding|CODING|FBtr0070910|1|1);UTR_5_PRIME(MODIFIER||841||810|Marf|protein_coding|CODING|FBtr0070909|1|1);UTR_5_PRIME(MODIFIER||841||814|M…	-
FBtr0070909	X_6260049_SNP	G	A	0.05587	10	169	1.03e-06	0.0483292	SiteClass[FBgn0029870|Marf|START_GAINED|0;FBgn0003655|swa|UPSTREAM|308],TranscriptAnnot[START_GAINED(LOW||||810|Marf|protein_coding|CODING|FBtr0070909|1|1);START_GAINED(LOW||||814|Marf|protein_coding|CODING|FBtr0343373|1|1);START_GAINED(LOW||||810|Marf|protein_coding|CODING|FBtr0070910|1|1);UTR_5_PRIME(MODIFIER||841||810|Marf|protein_coding|CODING|FBtr0070909|1|1);UTR_5_PRIME(MODIFIER||841||814|M…	-
FBtr0343373	X_6260049_SNP	G	A	0.05587	10	169	1.03e-06	0.0483292	SiteClass[FBgn0029870|Marf|START_GAINED|0;FBgn0003655|swa|UPSTREAM|308],TranscriptAnnot[START_GAINED(LOW||||810|Marf|protein_coding|CODING|FBtr0070909|1|1);START_GAINED(LOW||||814|Marf|protein_coding|CODING|FBtr0343373|1|1);START_GAINED(LOW||||810|Marf|protein_coding|CODING|FBtr0070910|1|1);UTR_5_PRIME(MODIFIER||841||810|Marf|protein_coding|CODING|FBtr0070909|1|1);UTR_5_PRIME(MODIFIER||841||814|M…	-
FBtr0070910	X_6260049_SNP	G	A	0.05587	10	169	1.03e-06	0.0483292	SiteClass[FBgn0029870|Marf|START_GAINED|0;FBgn0003655|swa|UPSTREAM|308],TranscriptAnnot[START_GAINED(LOW||||810|Marf|protein_coding|CODING|FBtr0070909|1|1);START_GAINED(LOW||||814|Marf|protein_coding|CODING|FBtr0343373|1|1);START_GAINED(LOW||||810|Marf|protein_coding|CODING|FBtr0070910|1|1);UTR_5_PRIME(MODIFIER||841||810|Marf|protein_coding|CODING|FBtr0070909|1|1);UTR_5_PRIME(MODIFIER||841||814|M…	-
FBtr0070922	X_6260049_SNP	G	A	0.05587	10	169	1.03e-06	0.0483292	SiteClass[FBgn0029870|Marf|START_GAINED|0;FBgn0003655|swa|UPSTREAM|308],TranscriptAnnot[START_GAINED(LOW||||810|Marf|protein_coding|CODING|FBtr0070909|1|1);START_GAINED(LOW||||814|Marf|protein_coding|CODING|FBtr0343373|1|1);START_GAINED(LOW||||810|Marf|protein_coding|CODING|FBtr0070910|1|1);UTR_5_PRIME(MODIFIER||841||810|Marf|protein_coding|CODING|FBtr0070909|1|1);UTR_5_PRIME(MODIFIER||841||814|M…	-
FBgn0036777	3L_18109147_SNP	C	A	0.1494	26	148	1.05e-06	0.0483292	SiteClass[FBgn0036777|CG7341|INTRON|0;FBgn0052195|CG32195|DOWNSTREAM|72],TranscriptAnnot[UTR_3_PRIME(MODIFIER||287||401|CG32195|protein_coding|CODING|FBtr0075125|4|1);DOWNSTREAM(MODIFIER||72||401|CG32195|protein_coding|CODING|FBtr0333696||1);DOWNSTREAM(MODIFIER||72||401|CG32195|protein_coding|CODING|FBtr0333697||1);INTRON(MODIFIER||||357|CG7341|protein_coding|CODING|FBtr0075124|1|1);INTRON(MODIFI…	This gene is referred to in FlyBase by the symbol Dmel\CG7341 (FBgn0036777). It is a protein_coding_gene from Drosophila melanogaster. It has 2 annotated transcripts and 2 polypeptides (1 unique). Gene sequence location is 3L:18112959..18121003. It has the cytological map location 75B10. Its molecular function is unknown. The biological processes in which it is involved are not known. 7 alleles a…
FBgn0052195	3L_18109147_SNP	C	A	0.1494	26	148	1.05e-06	0.0483292	SiteClass[FBgn0036777|CG7341|INTRON|0;FBgn0052195|CG32195|DOWNSTREAM|72],TranscriptAnnot[UTR_3_PRIME(MODIFIER||287||401|CG32195|protein_coding|CODING|FBtr0075125|4|1);DOWNSTREAM(MODIFIER||72||401|CG32195|protein_coding|CODING|FBtr0333696||1);DOWNSTREAM(MODIFIER||72||401|CG32195|protein_coding|CODING|FBtr0333697||1);INTRON(MODIFIER||||357|CG7341|protein_coding|CODING|FBtr0075124|1|1);INTRON(MODIFI…	This gene is referred to in FlyBase by the symbol Dmel\CG32195 (FBgn0052195). It is a protein_coding_gene from Drosophila melanogaster. It has 3 annotated transcripts and 3 polypeptides (1 unique). Gene sequence location is 3L:18112959..18119150. It has the cytological map location 75B10. Protein features are: CHK kinase-like; Protein kinase-like domain; Protein of unknown function DUF227. Its mo…
FBtr0075125	3L_18109147_SNP	C	A	0.1494	26	148	1.05e-06	0.0483292	SiteClass[FBgn0036777|CG7341|INTRON|0;FBgn0052195|CG32195|DOWNSTREAM|72],TranscriptAnnot[UTR_3_PRIME(MODIFIER||287||401|CG32195|protein_coding|CODING|FBtr0075125|4|1);DOWNSTREAM(MODIFIER||72||401|CG32195|protein_coding|CODING|FBtr0333696||1);DOWNSTREAM(MODIFIER||72||401|CG32195|protein_coding|CODING|FBtr0333697||1);INTRON(MODIFIER||||357|CG7341|protein_coding|CODING|FBtr0075124|1|1);INTRON(MODIFI…	-
FBtr0333696	3L_18109147_SNP	C	A	0.1494	26	148	1.05e-06	0.0483292	SiteClass[FBgn0036777|CG7341|INTRON|0;FBgn0052195|CG32195|DOWNSTREAM|72],TranscriptAnnot[UTR_3_PRIME(MODIFIER||287||401|CG32195|protein_coding|CODING|FBtr0075125|4|1);DOWNSTREAM(MODIFIER||72||401|CG32195|protein_coding|CODING|FBtr0333696||1);DOWNSTREAM(MODIFIER||72||401|CG32195|protein_coding|CODING|FBtr0333697||1);INTRON(MODIFIER||||357|CG7341|protein_coding|CODING|FBtr0075124|1|1);INTRON(MODIFI…	-
FBtr0333697	3L_18109147_SNP	C	A	0.1494	26	148	1.05e-06	0.0483292	SiteClass[FBgn0036777|CG7341|INTRON|0;FBgn0052195|CG32195|DOWNSTREAM|72],TranscriptAnnot[UTR_3_PRIME(MODIFIER||287||401|CG32195|protein_coding|CODING|FBtr0075125|4|1);DOWNSTREAM(MODIFIER||72||401|CG32195|protein_coding|CODING|FBtr0333696||1);DOWNSTREAM(MODIFIER||72||401|CG32195|protein_coding|CODING|FBtr0333697||1);INTRON(MODIFIER||||357|CG7341|protein_coding|CODING|FBtr0075124|1|1);INTRON(MODIFI…	-
FBtr0075124	3L_18109147_SNP	C	A	0.1494	26	148	1.05e-06	0.0483292	SiteClass[FBgn0036777|CG7341|INTRON|0;FBgn0052195|CG32195|DOWNSTREAM|72],TranscriptAnnot[UTR_3_PRIME(MODIFIER||287||401|CG32195|protein_coding|CODING|FBtr0075125|4|1);DOWNSTREAM(MODIFIER||72||401|CG32195|protein_coding|CODING|FBtr0333696||1);DOWNSTREAM(MODIFIER||72||401|CG32195|protein_coding|CODING|FBtr0333697||1);INTRON(MODIFIER||||357|CG7341|protein_coding|CODING|FBtr0075124|1|1);INTRON(MODIFI…	-
FBtr0075123	3L_18109147_SNP	C	A	0.1494	26	148	1.05e-06	0.0483292	SiteClass[FBgn0036777|CG7341|INTRON|0;FBgn0052195|CG32195|DOWNSTREAM|72],TranscriptAnnot[UTR_3_PRIME(MODIFIER||287||401|CG32195|protein_coding|CODING|FBtr0075125|4|1);DOWNSTREAM(MODIFIER||72||401|CG32195|protein_coding|CODING|FBtr0333696||1);DOWNSTREAM(MODIFIER||72||401|CG32195|protein_coding|CODING|FBtr0333697||1);INTRON(MODIFIER||||357|CG7341|protein_coding|CODING|FBtr0075124|1|1);INTRON(MODIFI…	-
FBgn0036777	3L_18109155_SNP	A	T	0.1369	23	145	1.06e-06	0.0483292	SiteClass[FBgn0036777|CG7341|INTRON|0;FBgn0052195|CG32195|DOWNSTREAM|80],TranscriptAnnot[UTR_3_PRIME(MODIFIER||295||401|CG32195|protein_coding|CODING|FBtr0075125|4|1);DOWNSTREAM(MODIFIER||80||401|CG32195|protein_coding|CODING|FBtr0333696||1);DOWNSTREAM(MODIFIER||80||401|CG32195|protein_coding|CODING|FBtr0333697||1);INTRON(MODIFIER||||357|CG7341|protein_coding|CODING|FBtr0075124|1|1);INTRON(MODIFI…	This gene is referred to in FlyBase by the symbol Dmel\CG7341 (FBgn0036777). It is a protein_coding_gene from Drosophila melanogaster. It has 2 annotated transcripts and 2 polypeptides (1 unique). Gene sequence location is 3L:18112959..18121003. It has the cytological map location 75B10. Its molecular function is unknown. The biological processes in which it is involved are not known. 7 alleles a…
FBgn0052195	3L_18109155_SNP	A	T	0.1369	23	145	1.06e-06	0.0483292	SiteClass[FBgn0036777|CG7341|INTRON|0;FBgn0052195|CG32195|DOWNSTREAM|80],TranscriptAnnot[UTR_3_PRIME(MODIFIER||295||401|CG32195|protein_coding|CODING|FBtr0075125|4|1);DOWNSTREAM(MODIFIER||80||401|CG32195|protein_coding|CODING|FBtr0333696||1);DOWNSTREAM(MODIFIER||80||401|CG32195|protein_coding|CODING|FBtr0333697||1);INTRON(MODIFIER||||357|CG7341|protein_coding|CODING|FBtr0075124|1|1);INTRON(MODIFI…	This gene is referred to in FlyBase by the symbol Dmel\CG32195 (FBgn0052195). It is a protein_coding_gene from Drosophila melanogaster. It has 3 annotated transcripts and 3 polypeptides (1 unique). Gene sequence location is 3L:18112959..18119150. It has the cytological map location 75B10. Protein features are: CHK kinase-like; Protein kinase-like domain; Protein of unknown function DUF227. Its mo…
FBtr0075125	3L_18109155_SNP	A	T	0.1369	23	145	1.06e-06	0.0483292	SiteClass[FBgn0036777|CG7341|INTRON|0;FBgn0052195|CG32195|DOWNSTREAM|80],TranscriptAnnot[UTR_3_PRIME(MODIFIER||295||401|CG32195|protein_coding|CODING|FBtr0075125|4|1);DOWNSTREAM(MODIFIER||80||401|CG32195|protein_coding|CODING|FBtr0333696||1);DOWNSTREAM(MODIFIER||80||401|CG32195|protein_coding|CODING|FBtr0333697||1);INTRON(MODIFIER||||357|CG7341|protein_coding|CODING|FBtr0075124|1|1);INTRON(MODIFI…	-
FBtr0333696	3L_18109155_SNP	A	T	0.1369	23	145	1.06e-06	0.0483292	SiteClass[FBgn0036777|CG7341|INTRON|0;FBgn0052195|CG32195|DOWNSTREAM|80],TranscriptAnnot[UTR_3_PRIME(MODIFIER||295||401|CG32195|protein_coding|CODING|FBtr0075125|4|1);DOWNSTREAM(MODIFIER||80||401|CG32195|protein_coding|CODING|FBtr0333696||1);DOWNSTREAM(MODIFIER||80||401|CG32195|protein_coding|CODING|FBtr0333697||1);INTRON(MODIFIER||||357|CG7341|protein_coding|CODING|FBtr0075124|1|1);INTRON(MODIFI…	-
FBtr0333697	3L_18109155_SNP	A	T	0.1369	23	145	1.06e-06	0.0483292	SiteClass[FBgn0036777|CG7341|INTRON|0;FBgn0052195|CG32195|DOWNSTREAM|80],TranscriptAnnot[UTR_3_PRIME(MODIFIER||295||401|CG32195|protein_coding|CODING|FBtr0075125|4|1);DOWNSTREAM(MODIFIER||80||401|CG32195|protein_coding|CODING|FBtr0333696||1);DOWNSTREAM(MODIFIER||80||401|CG32195|protein_coding|CODING|FBtr0333697||1);INTRON(MODIFIER||||357|CG7341|protein_coding|CODING|FBtr0075124|1|1);INTRON(MODIFI…	-
FBtr0075124	3L_18109155_SNP	A	T	0.1369	23	145	1.06e-06	0.0483292	SiteClass[FBgn0036777|CG7341|INTRON|0;FBgn0052195|CG32195|DOWNSTREAM|80],TranscriptAnnot[UTR_3_PRIME(MODIFIER||295||401|CG32195|protein_coding|CODING|FBtr0075125|4|1);DOWNSTREAM(MODIFIER||80||401|CG32195|protein_coding|CODING|FBtr0333696||1);DOWNSTREAM(MODIFIER||80||401|CG32195|protein_coding|CODING|FBtr0333697||1);INTRON(MODIFIER||||357|CG7341|protein_coding|CODING|FBtr0075124|1|1);INTRON(MODIFI…	-
FBtr0075123	3L_18109155_SNP	A	T	0.1369	23	145	1.06e-06	0.0483292	SiteClass[FBgn0036777|CG7341|INTRON|0;FBgn0052195|CG32195|DOWNSTREAM|80],TranscriptAnnot[UTR_3_PRIME(MODIFIER||295||401|CG32195|protein_coding|CODING|FBtr0075125|4|1);DOWNSTREAM(MODIFIER||80||401|CG32195|protein_coding|CODING|FBtr0333696||1);DOWNSTREAM(MODIFIER||80||401|CG32195|protein_coding|CODING|FBtr0333697||1);INTRON(MODIFIER||||357|CG7341|protein_coding|CODING|FBtr0075124|1|1);INTRON(MODIFI…	-
FBgn0039177	3R_20106547_SNP	C	G	0.05	9	171	1.08e-06	0.0483292	SiteClass[FBgn0039177|CG13611|NON_SYNONYMOUS_CODING|0],TranscriptAnnot[NON_SYNONYMOUS_CODING(MODERATE|MISSENSE|caG/caC|Q246H|477|CG13611|protein_coding|CODING|FBtr0084600|3|1)]	This gene is referred to in FlyBase by the symbol Dmel\CG13611 (FBgn0039177). It is a protein_coding_gene from Drosophila melanogaster. It has one annotated transcript and one polypeptide. Gene sequence location is 3R:24279572..24281576. It has the cytological map location 95F8-95F9. Protein features are: Amine oxidase; FAD/NAD(P)-binding domain. Its molecular function is described by: oxidoreduc…
FBtr0084600	3R_20106547_SNP	C	G	0.05	9	171	1.08e-06	0.0483292	SiteClass[FBgn0039177|CG13611|NON_SYNONYMOUS_CODING|0],TranscriptAnnot[NON_SYNONYMOUS_CODING(MODERATE|MISSENSE|caG/caC|Q246H|477|CG13611|protein_coding|CODING|FBtr0084600|3|1)]	-
FBgn0039668	3R_25328025_SNP	C	G	0.05233	9	163	1.11e-06	0.0483946	SiteClass[FBgn0039668|Trc8|INTRON|0],TranscriptAnnot[INTRON(MODIFIER||||804|Trc8|protein_coding|CODING|FBtr0085429|1|1);INTRON(MODIFIER||||804|Trc8|protein_coding|CODING|FBtr0085430|1|1);INTRON(MODIFIER||||809|Trc8|protein_coding|CODING|FBtr0085432|1|1);INTRON(MODIFIER||||804|Trc8|protein_coding|CODING|FBtr0333188|1|1)]	The gene TRC8 ortholog is referred to in FlyBase by the symbol Dmel\Trc8 (CG2304, FBgn0039668). It is a protein_coding_gene from Drosophila melanogaster. It has 4 annotated transcripts and 4 polypeptides (2 unique). Gene sequence location is 3R:29499025..29503797. It has the cytological map location 99B1. Protein features are: TRC8 N-terminal domain; Zinc finger, RING-type; Zinc finger, RING/FYVE…
FBtr0085429	3R_25328025_SNP	C	G	0.05233	9	163	1.11e-06	0.0483946	SiteClass[FBgn0039668|Trc8|INTRON|0],TranscriptAnnot[INTRON(MODIFIER||||804|Trc8|protein_coding|CODING|FBtr0085429|1|1);INTRON(MODIFIER||||804|Trc8|protein_coding|CODING|FBtr0085430|1|1);INTRON(MODIFIER||||809|Trc8|protein_coding|CODING|FBtr0085432|1|1);INTRON(MODIFIER||||804|Trc8|protein_coding|CODING|FBtr0333188|1|1)]	-
FBtr0085430	3R_25328025_SNP	C	G	0.05233	9	163	1.11e-06	0.0483946	SiteClass[FBgn0039668|Trc8|INTRON|0],TranscriptAnnot[INTRON(MODIFIER||||804|Trc8|protein_coding|CODING|FBtr0085429|1|1);INTRON(MODIFIER||||804|Trc8|protein_coding|CODING|FBtr0085430|1|1);INTRON(MODIFIER||||809|Trc8|protein_coding|CODING|FBtr0085432|1|1);INTRON(MODIFIER||||804|Trc8|protein_coding|CODING|FBtr0333188|1|1)]	-
FBtr0085432	3R_25328025_SNP	C	G	0.05233	9	163	1.11e-06	0.0483946	SiteClass[FBgn0039668|Trc8|INTRON|0],TranscriptAnnot[INTRON(MODIFIER||||804|Trc8|protein_coding|CODING|FBtr0085429|1|1);INTRON(MODIFIER||||804|Trc8|protein_coding|CODING|FBtr0085430|1|1);INTRON(MODIFIER||||809|Trc8|protein_coding|CODING|FBtr0085432|1|1);INTRON(MODIFIER||||804|Trc8|protein_coding|CODING|FBtr0333188|1|1)]	-
FBtr0333188	3R_25328025_SNP	C	G	0.05233	9	163	1.11e-06	0.0483946	SiteClass[FBgn0039668|Trc8|INTRON|0],TranscriptAnnot[INTRON(MODIFIER||||804|Trc8|protein_coding|CODING|FBtr0085429|1|1);INTRON(MODIFIER||||804|Trc8|protein_coding|CODING|FBtr0085430|1|1);INTRON(MODIFIER||||809|Trc8|protein_coding|CODING|FBtr0085432|1|1);INTRON(MODIFIER||||804|Trc8|protein_coding|CODING|FBtr0333188|1|1)]	-
FBgn0086450	X_9095103_SNP	C	T	0.1345	23	148	1.28e-06	0.0534749	SiteClass[FBgn0086450|su_r_|INTRON|0],TranscriptAnnot[INTRON(MODIFIER||||1031|su_r_|protein_coding|CODING|FBtr0071338|1|1)]	The gene suppressor of rudimentary is referred to in FlyBase by the symbol Dmel\su(r) (CG2194, FBgn0086450). It is a protein_coding_gene from Drosophila melanogaster. It has one annotated transcript and one polypeptide. Gene sequence location is X:9196808..9201820. It has the cytological map location 8D1. Protein features are: 4Fe-4S ferredoxin, iron-sulphur binding, conserved site; 4Fe-4S ferred…
FBtr0071338	X_9095103_SNP	C	T	0.1345	23	148	1.28e-06	0.0534749	SiteClass[FBgn0086450|su_r_|INTRON|0],TranscriptAnnot[INTRON(MODIFIER||||1031|su_r_|protein_coding|CODING|FBtr0071338|1|1)]	-
FBgn0264748	3L_18062583_SNP	T	C	0.06548	11	157	1.29e-06	0.0534749	SiteClass[FBgn0264748|CG44006|NON_SYNONYMOUS_CODING|0;FBgn0264747|CG44005|DOWNSTREAM|817],TranscriptAnnot[NON_SYNONYMOUS_CODING(MODERATE|MISSENSE|tGc/tAc|C168Y|374|CG44006|protein_coding|CODING|FBtr0334132|2|1);DOWNSTREAM(MODIFIER||817||370|CG44005|protein_coding|CODING|FBtr0334131||1);DOWNSTREAM(MODIFIER||976||370|CG44005|protein_coding|CODING|FBtr0334130||1)]	This gene is referred to in FlyBase by the symbol Dmel\CG44006 (FBgn0264748). It is a protein_coding_gene from Drosophila melanogaster. It has one annotated transcript and one polypeptide. Gene sequence location is 3L:18068728..18070150. It has the cytological map location 75B6. Protein features are: Leucine-rich repeat domain, L domain-like. Its molecular function is unknown. The biological proc…
FBgn0264747	3L_18062583_SNP	T	C	0.06548	11	157	1.29e-06	0.0534749	SiteClass[FBgn0264748|CG44006|NON_SYNONYMOUS_CODING|0;FBgn0264747|CG44005|DOWNSTREAM|817],TranscriptAnnot[NON_SYNONYMOUS_CODING(MODERATE|MISSENSE|tGc/tAc|C168Y|374|CG44006|protein_coding|CODING|FBtr0334132|2|1);DOWNSTREAM(MODIFIER||817||370|CG44005|protein_coding|CODING|FBtr0334131||1);DOWNSTREAM(MODIFIER||976||370|CG44005|protein_coding|CODING|FBtr0334130||1)]	This gene is referred to in FlyBase by the symbol Dmel\CG44005 (FBgn0264747). It is a protein_coding_gene from Drosophila melanogaster. It has 2 annotated transcripts and 2 polypeptides (1 unique). Gene sequence location is 3L:18070300..18072123. It has the cytological map location 75B6. Protein features are: Leucine-rich repeat domain, L domain-like. Its molecular function is unknown. The biolog…
FBtr0334132	3L_18062583_SNP	T	C	0.06548	11	157	1.29e-06	0.0534749	SiteClass[FBgn0264748|CG44006|NON_SYNONYMOUS_CODING|0;FBgn0264747|CG44005|DOWNSTREAM|817],TranscriptAnnot[NON_SYNONYMOUS_CODING(MODERATE|MISSENSE|tGc/tAc|C168Y|374|CG44006|protein_coding|CODING|FBtr0334132|2|1);DOWNSTREAM(MODIFIER||817||370|CG44005|protein_coding|CODING|FBtr0334131||1);DOWNSTREAM(MODIFIER||976||370|CG44005|protein_coding|CODING|FBtr0334130||1)]	-
FBtr0334131	3L_18062583_SNP	T	C	0.06548	11	157	1.29e-06	0.0534749	SiteClass[FBgn0264748|CG44006|NON_SYNONYMOUS_CODING|0;FBgn0264747|CG44005|DOWNSTREAM|817],TranscriptAnnot[NON_SYNONYMOUS_CODING(MODERATE|MISSENSE|tGc/tAc|C168Y|374|CG44006|protein_coding|CODING|FBtr0334132|2|1);DOWNSTREAM(MODIFIER||817||370|CG44005|protein_coding|CODING|FBtr0334131||1);DOWNSTREAM(MODIFIER||976||370|CG44005|protein_coding|CODING|FBtr0334130||1)]	-
FBtr0334130	3L_18062583_SNP	T	C	0.06548	11	157	1.29e-06	0.0534749	SiteClass[FBgn0264748|CG44006|NON_SYNONYMOUS_CODING|0;FBgn0264747|CG44005|DOWNSTREAM|817],TranscriptAnnot[NON_SYNONYMOUS_CODING(MODERATE|MISSENSE|tGc/tAc|C168Y|374|CG44006|protein_coding|CODING|FBtr0334132|2|1);DOWNSTREAM(MODIFIER||817||370|CG44005|protein_coding|CODING|FBtr0334131||1);DOWNSTREAM(MODIFIER||976||370|CG44005|protein_coding|CODING|FBtr0334130||1)]	-
FBgn0262617	3R_6097864_SNP	G	A	0.05263	9	162	1.32e-06	0.0534749	SiteClass[FBgn0262617|CG43143|INTRON|0],TranscriptAnnot[INTRON(MODIFIER||||1180|CG43143|protein_coding|CODING|FBtr0305351|1|1);INTRON(MODIFIER||||1427|CG43143|protein_coding|CODING|FBtr0305354|1|1);INTRON(MODIFIER||||1532|CG43143|protein_coding|CODING|FBtr0305356|1|1);INTRON(MODIFIER||||2556|CG43143|protein_coding|CODING|FBtr0337050|1|1)]	This gene is referred to in FlyBase by the symbol Dmel\CG43143 (FBgn0262617). It is a protein_coding_gene from Drosophila melanogaster. It has 9 annotated transcripts and 9 polypeptides (7 unique). Gene sequence location is 3R:10264306..10308467. It has the cytological map location 86A7. Protein features are: Protein kinase domain; Protein kinase, ATP binding site; Protein kinase-like domain; Ser…
FBtr0305351	3R_6097864_SNP	G	A	0.05263	9	162	1.32e-06	0.0534749	SiteClass[FBgn0262617|CG43143|INTRON|0],TranscriptAnnot[INTRON(MODIFIER||||1180|CG43143|protein_coding|CODING|FBtr0305351|1|1);INTRON(MODIFIER||||1427|CG43143|protein_coding|CODING|FBtr0305354|1|1);INTRON(MODIFIER||||1532|CG43143|protein_coding|CODING|FBtr0305356|1|1);INTRON(MODIFIER||||2556|CG43143|protein_coding|CODING|FBtr0337050|1|1)]	-
FBtr0305354	3R_6097864_SNP	G	A	0.05263	9	162	1.32e-06	0.0534749	SiteClass[FBgn0262617|CG43143|INTRON|0],TranscriptAnnot[INTRON(MODIFIER||||1180|CG43143|protein_coding|CODING|FBtr0305351|1|1);INTRON(MODIFIER||||1427|CG43143|protein_coding|CODING|FBtr0305354|1|1);INTRON(MODIFIER||||1532|CG43143|protein_coding|CODING|FBtr0305356|1|1);INTRON(MODIFIER||||2556|CG43143|protein_coding|CODING|FBtr0337050|1|1)]	-
FBtr0305356	3R_6097864_SNP	G	A	0.05263	9	162	1.32e-06	0.0534749	SiteClass[FBgn0262617|CG43143|INTRON|0],TranscriptAnnot[INTRON(MODIFIER||||1180|CG43143|protein_coding|CODING|FBtr0305351|1|1);INTRON(MODIFIER||||1427|CG43143|protein_coding|CODING|FBtr0305354|1|1);INTRON(MODIFIER||||1532|CG43143|protein_coding|CODING|FBtr0305356|1|1);INTRON(MODIFIER||||2556|CG43143|protein_coding|CODING|FBtr0337050|1|1)]	-
FBtr0337050	3R_6097864_SNP	G	A	0.05263	9	162	1.32e-06	0.0534749	SiteClass[FBgn0262617|CG43143|INTRON|0],TranscriptAnnot[INTRON(MODIFIER||||1180|CG43143|protein_coding|CODING|FBtr0305351|1|1);INTRON(MODIFIER||||1427|CG43143|protein_coding|CODING|FBtr0305354|1|1);INTRON(MODIFIER||||1532|CG43143|protein_coding|CODING|FBtr0305356|1|1);INTRON(MODIFIER||||2556|CG43143|protein_coding|CODING|FBtr0337050|1|1)]	-
FBgn0264357	3R_17040003_INS	AGA	A	0.06875	11	149	1.34e-06	0.0534749	SiteClass[FBgn0264357|SNF4Agamma|DOWNSTREAM|13;FBgn0038868|CG5862|UPSTREAM|797],TranscriptAnnot[UPSTREAM(MODIFIER||797||309|CG5862|protein_coding|CODING|FBtr0084049||1);DOWNSTREAM(MODIFIER||13||906|SNF4Agamma|protein_coding|CODING|FBtr0301586||1);DOWNSTREAM(MODIFIER||13||1400|SNF4Agamma|protein_coding|CODING|FBtr0301588||1);INTERGENIC(MODIFIER||||||||||1)]	The gene SNF4/AMP-activated protein kinase gamma subunit is referred to in FlyBase by the symbol Dmel\SNF4AŒ_ (CG17299, FBgn0264357). It is a protein_coding_gene from Drosophila melanogaster. It has 16 annotated transcripts and 16 polypeptides (6 unique). Gene sequence location is 3R:21140739..21214269. It has the cytological map location 93C1-93C. Protein features are: CBS domain. Its molecular …
FBgn0038868	3R_17040003_INS	AGA	A	0.06875	11	149	1.34e-06	0.0534749	SiteClass[FBgn0264357|SNF4Agamma|DOWNSTREAM|13;FBgn0038868|CG5862|UPSTREAM|797],TranscriptAnnot[UPSTREAM(MODIFIER||797||309|CG5862|protein_coding|CODING|FBtr0084049||1);DOWNSTREAM(MODIFIER||13||906|SNF4Agamma|protein_coding|CODING|FBtr0301586||1);DOWNSTREAM(MODIFIER||13||1400|SNF4Agamma|protein_coding|CODING|FBtr0301588||1);INTERGENIC(MODIFIER||||||||||1)]	This gene is referred to in FlyBase by the symbol Dmel\CG5862 (FBgn0038868). It is a protein_coding_gene from Drosophila melanogaster. It has one annotated transcript and one polypeptide. Gene sequence location is 3R:21215079..21216226. It has the cytological map location 93C6. Protein features are: DDRGK domain containing protein; Winged helix-turn-helix DNA-binding domain. Its molecular functio…
FBtr0084049	3R_17040003_INS	AGA	A	0.06875	11	149	1.34e-06	0.0534749	SiteClass[FBgn0264357|SNF4Agamma|DOWNSTREAM|13;FBgn0038868|CG5862|UPSTREAM|797],TranscriptAnnot[UPSTREAM(MODIFIER||797||309|CG5862|protein_coding|CODING|FBtr0084049||1);DOWNSTREAM(MODIFIER||13||906|SNF4Agamma|protein_coding|CODING|FBtr0301586||1);DOWNSTREAM(MODIFIER||13||1400|SNF4Agamma|protein_coding|CODING|FBtr0301588||1);INTERGENIC(MODIFIER||||||||||1)]	-
FBtr0301586	3R_17040003_INS	AGA	A	0.06875	11	149	1.34e-06	0.0534749	SiteClass[FBgn0264357|SNF4Agamma|DOWNSTREAM|13;FBgn0038868|CG5862|UPSTREAM|797],TranscriptAnnot[UPSTREAM(MODIFIER||797||309|CG5862|protein_coding|CODING|FBtr0084049||1);DOWNSTREAM(MODIFIER||13||906|SNF4Agamma|protein_coding|CODING|FBtr0301586||1);DOWNSTREAM(MODIFIER||13||1400|SNF4Agamma|protein_coding|CODING|FBtr0301588||1);INTERGENIC(MODIFIER||||||||||1)]	-
FBtr0301588	3R_17040003_INS	AGA	A	0.06875	11	149	1.34e-06	0.0534749	SiteClass[FBgn0264357|SNF4Agamma|DOWNSTREAM|13;FBgn0038868|CG5862|UPSTREAM|797],TranscriptAnnot[UPSTREAM(MODIFIER||797||309|CG5862|protein_coding|CODING|FBtr0084049||1);DOWNSTREAM(MODIFIER||13||906|SNF4Agamma|protein_coding|CODING|FBtr0301586||1);DOWNSTREAM(MODIFIER||13||1400|SNF4Agamma|protein_coding|CODING|FBtr0301588||1);INTERGENIC(MODIFIER||||||||||1)]	-
FBgn0085376	3R_27149510_SNP	T	G	0.05114	9	167	1.49e-06	0.0581814	SiteClass[FBgn0085376|CG34347|INTRON|0],TranscriptAnnot[INTRON(MODIFIER||||1517|CG34347|protein_coding|CODING|FBtr0290046|1|1);INTRON(MODIFIER||||1512|CG34347|protein_coding|CODING|FBtr0334566|2|1)]	This gene is referred to in FlyBase by the symbol Dmel\CG34347 (FBgn0085376). It is a protein_coding_gene from Drosophila melanogaster. It has 2 annotated transcripts and 2 polypeptides (all unique). Gene sequence location is 3R:31311157..31371748. It has the cytological map location 100C1-100C2. Protein features are: Band 4.1 domain; FERM adjacent (FA); FERM central domain; FERM domain; FERM, C-…
FBtr0290046	3R_27149510_SNP	T	G	0.05114	9	167	1.49e-06	0.0581814	SiteClass[FBgn0085376|CG34347|INTRON|0],TranscriptAnnot[INTRON(MODIFIER||||1517|CG34347|protein_coding|CODING|FBtr0290046|1|1);INTRON(MODIFIER||||1512|CG34347|protein_coding|CODING|FBtr0334566|2|1)]	-
FBtr0334566	3R_27149510_SNP	T	G	0.05114	9	167	1.49e-06	0.0581814	SiteClass[FBgn0085376|CG34347|INTRON|0],TranscriptAnnot[INTRON(MODIFIER||||1517|CG34347|protein_coding|CODING|FBtr0290046|1|1);INTRON(MODIFIER||||1512|CG34347|protein_coding|CODING|FBtr0334566|2|1)]	-
FBgn0260642	3R_2784588_SNP	G	A	0.09877	16	146	1.52e-06	0.0583974	SiteClass[FBgn0260642|Antp|INTRON|0],TranscriptAnnot[INTRON(MODIFIER||||378|Antp|protein_coding|CODING|FBtr0081647|2|1);INTRON(MODIFIER||||361|Antp|protein_coding|CODING|FBtr0081649|2|1);INTRON(MODIFIER||||365|Antp|protein_coding|CODING|FBtr0081650|2|1);INTRON(MODIFIER||||374|Antp|protein_coding|CODING|FBtr0081651|2|1);INTRON(MODIFIER||||378|Antp|protein_coding|CODING|FBtr0081654|2|1)]	The gene Antennapedia is referred to in FlyBase by the symbol Dmel\Antp (CG1028, FBgn0260642). It is a protein_coding_gene from Drosophila melanogaster. It has 11 annotated transcripts and 11 polypeptides (5 unique). Gene sequence location is 3R:6896253..6999228. It has the cytological map location 84A6-84B2. Protein features are: Homeobox domain; Homeobox protein, antennapedia type; Homeobox pro…
FBtr0081647	3R_2784588_SNP	G	A	0.09877	16	146	1.52e-06	0.0583974	SiteClass[FBgn0260642|Antp|INTRON|0],TranscriptAnnot[INTRON(MODIFIER||||378|Antp|protein_coding|CODING|FBtr0081647|2|1);INTRON(MODIFIER||||361|Antp|protein_coding|CODING|FBtr0081649|2|1);INTRON(MODIFIER||||365|Antp|protein_coding|CODING|FBtr0081650|2|1);INTRON(MODIFIER||||374|Antp|protein_coding|CODING|FBtr0081651|2|1);INTRON(MODIFIER||||378|Antp|protein_coding|CODING|FBtr0081654|2|1)]	-
FBtr0081649	3R_2784588_SNP	G	A	0.09877	16	146	1.52e-06	0.0583974	SiteClass[FBgn0260642|Antp|INTRON|0],TranscriptAnnot[INTRON(MODIFIER||||378|Antp|protein_coding|CODING|FBtr0081647|2|1);INTRON(MODIFIER||||361|Antp|protein_coding|CODING|FBtr0081649|2|1);INTRON(MODIFIER||||365|Antp|protein_coding|CODING|FBtr0081650|2|1);INTRON(MODIFIER||||374|Antp|protein_coding|CODING|FBtr0081651|2|1);INTRON(MODIFIER||||378|Antp|protein_coding|CODING|FBtr0081654|2|1)]	-
FBtr0081650	3R_2784588_SNP	G	A	0.09877	16	146	1.52e-06	0.0583974	SiteClass[FBgn0260642|Antp|INTRON|0],TranscriptAnnot[INTRON(MODIFIER||||378|Antp|protein_coding|CODING|FBtr0081647|2|1);INTRON(MODIFIER||||361|Antp|protein_coding|CODING|FBtr0081649|2|1);INTRON(MODIFIER||||365|Antp|protein_coding|CODING|FBtr0081650|2|1);INTRON(MODIFIER||||374|Antp|protein_coding|CODING|FBtr0081651|2|1);INTRON(MODIFIER||||378|Antp|protein_coding|CODING|FBtr0081654|2|1)]	-
FBtr0081651	3R_2784588_SNP	G	A	0.09877	16	146	1.52e-06	0.0583974	SiteClass[FBgn0260642|Antp|INTRON|0],TranscriptAnnot[INTRON(MODIFIER||||378|Antp|protein_coding|CODING|FBtr0081647|2|1);INTRON(MODIFIER||||361|Antp|protein_coding|CODING|FBtr0081649|2|1);INTRON(MODIFIER||||365|Antp|protein_coding|CODING|FBtr0081650|2|1);INTRON(MODIFIER||||374|Antp|protein_coding|CODING|FBtr0081651|2|1);INTRON(MODIFIER||||378|Antp|protein_coding|CODING|FBtr0081654|2|1)]	-
FBtr0081654	3R_2784588_SNP	G	A	0.09877	16	146	1.52e-06	0.0583974	SiteClass[FBgn0260642|Antp|INTRON|0],TranscriptAnnot[INTRON(MODIFIER||||378|Antp|protein_coding|CODING|FBtr0081647|2|1);INTRON(MODIFIER||||361|Antp|protein_coding|CODING|FBtr0081649|2|1);INTRON(MODIFIER||||365|Antp|protein_coding|CODING|FBtr0081650|2|1);INTRON(MODIFIER||||374|Antp|protein_coding|CODING|FBtr0081651|2|1);INTRON(MODIFIER||||378|Antp|protein_coding|CODING|FBtr0081654|2|1)]	-
FBgn0264598	X_2266611_SNP	T	A	0.3448	60	114	1.58e-06	0.0590689	SiteClass[FBgn0264598|PsGEF|INTRON|0],TranscriptAnnot[UTR_3_PRIME(MODIFIER||1433||1403|PsGEF|protein_coding|CODING|FBtr0333533|10|1);INTRON(MODIFIER||||2006|PsGEF|protein_coding|CODING|FBtr0333532|10|1);INTRON(MODIFIER||||2738|PsGEF|protein_coding|CODING|FBtr0333530|10|1);INTRON(MODIFIER||||2033|PsGEF|protein_coding|CODING|FBtr0333531|10|1);INTRON(MODIFIER||||2777|PsGEF|protein_coding|CODING|FBtr…	The gene Protostome-specific GEF is referred to in FlyBase by the symbol Dmel\PsGEF (CG43947, FBgn0264598). It is a protein_coding_gene from Drosophila melanogaster. It has 8 annotated transcripts and 8 polypeptides (all unique). Gene sequence location is X:2367121..2387664. It has the cytological map location 3A2. Protein features are: C2 domain; Dbl homology (DH) domain; PDZ domain; PH domain-l…
FBtr0333533	X_2266611_SNP	T	A	0.3448	60	114	1.58e-06	0.0590689	SiteClass[FBgn0264598|PsGEF|INTRON|0],TranscriptAnnot[UTR_3_PRIME(MODIFIER||1433||1403|PsGEF|protein_coding|CODING|FBtr0333533|10|1);INTRON(MODIFIER||||2006|PsGEF|protein_coding|CODING|FBtr0333532|10|1);INTRON(MODIFIER||||2738|PsGEF|protein_coding|CODING|FBtr0333530|10|1);INTRON(MODIFIER||||2033|PsGEF|protein_coding|CODING|FBtr0333531|10|1);INTRON(MODIFIER||||2777|PsGEF|protein_coding|CODING|FBtr…	-
FBtr0333532	X_2266611_SNP	T	A	0.3448	60	114	1.58e-06	0.0590689	SiteClass[FBgn0264598|PsGEF|INTRON|0],TranscriptAnnot[UTR_3_PRIME(MODIFIER||1433||1403|PsGEF|protein_coding|CODING|FBtr0333533|10|1);INTRON(MODIFIER||||2006|PsGEF|protein_coding|CODING|FBtr0333532|10|1);INTRON(MODIFIER||||2738|PsGEF|protein_coding|CODING|FBtr0333530|10|1);INTRON(MODIFIER||||2033|PsGEF|protein_coding|CODING|FBtr0333531|10|1);INTRON(MODIFIER||||2777|PsGEF|protein_coding|CODING|FBtr…	-
FBtr0333530	X_2266611_SNP	T	A	0.3448	60	114	1.58e-06	0.0590689	SiteClass[FBgn0264598|PsGEF|INTRON|0],TranscriptAnnot[UTR_3_PRIME(MODIFIER||1433||1403|PsGEF|protein_coding|CODING|FBtr0333533|10|1);INTRON(MODIFIER||||2006|PsGEF|protein_coding|CODING|FBtr0333532|10|1);INTRON(MODIFIER||||2738|PsGEF|protein_coding|CODING|FBtr0333530|10|1);INTRON(MODIFIER||||2033|PsGEF|protein_coding|CODING|FBtr0333531|10|1);INTRON(MODIFIER||||2777|PsGEF|protein_coding|CODING|FBtr…	-
FBtr0333531	X_2266611_SNP	T	A	0.3448	60	114	1.58e-06	0.0590689	SiteClass[FBgn0264598|PsGEF|INTRON|0],TranscriptAnnot[UTR_3_PRIME(MODIFIER||1433||1403|PsGEF|protein_coding|CODING|FBtr0333533|10|1);INTRON(MODIFIER||||2006|PsGEF|protein_coding|CODING|FBtr0333532|10|1);INTRON(MODIFIER||||2738|PsGEF|protein_coding|CODING|FBtr0333530|10|1);INTRON(MODIFIER||||2033|PsGEF|protein_coding|CODING|FBtr0333531|10|1);INTRON(MODIFIER||||2777|PsGEF|protein_coding|CODING|FBtr…	-
FBtr0333529	X_2266611_SNP	T	A	0.3448	60	114	1.58e-06	0.0590689	SiteClass[FBgn0264598|PsGEF|INTRON|0],TranscriptAnnot[UTR_3_PRIME(MODIFIER||1433||1403|PsGEF|protein_coding|CODING|FBtr0333533|10|1);INTRON(MODIFIER||||2006|PsGEF|protein_coding|CODING|FBtr0333532|10|1);INTRON(MODIFIER||||2738|PsGEF|protein_coding|CODING|FBtr0333530|10|1);INTRON(MODIFIER||||2033|PsGEF|protein_coding|CODING|FBtr0333531|10|1);INTRON(MODIFIER||||2777|PsGEF|protein_coding|CODING|FBtr…	-
FBgn0038282	3R_10899344_SNP	G	C	0.06322	11	163	1.61e-06	0.0590689	SiteClass[FBgn0038282|dpr9|INTRON|0],TranscriptAnnot[INTRON(MODIFIER||||602|dpr9|protein_coding|CODING|FBtr0089376|2|1);INTRON(MODIFIER||||602|dpr9|protein_coding|CODING|FBtr0346114|2|1)]	The gene defective proboscis extension response 9 is referred to in FlyBase by the symbol Dmel\dpr9 (CG33485, FBgn0038282). It is a protein_coding_gene from Drosophila melanogaster. It has 2 annotated transcripts and 2 polypeptides (1 unique). Gene sequence location is 3R:15054930..15077206. It has the cytological map location 88E1. Protein features are: Immunoglobulin; Immunoglobulin V-set domai…
FBtr0089376	3R_10899344_SNP	G	C	0.06322	11	163	1.61e-06	0.0590689	SiteClass[FBgn0038282|dpr9|INTRON|0],TranscriptAnnot[INTRON(MODIFIER||||602|dpr9|protein_coding|CODING|FBtr0089376|2|1);INTRON(MODIFIER||||602|dpr9|protein_coding|CODING|FBtr0346114|2|1)]	-
FBtr0346114	3R_10899344_SNP	G	C	0.06322	11	163	1.61e-06	0.0590689	SiteClass[FBgn0038282|dpr9|INTRON|0],TranscriptAnnot[INTRON(MODIFIER||||602|dpr9|protein_coding|CODING|FBtr0089376|2|1);INTRON(MODIFIER||||602|dpr9|protein_coding|CODING|FBtr0346114|2|1)]	-
FBgn0036777	3L_18109159_SNP	A	G	0.1395	24	148	1.73e-06	0.0590689	SiteClass[FBgn0036777|CG7341|INTRON|0;FBgn0052195|CG32195|DOWNSTREAM|84],TranscriptAnnot[UTR_3_PRIME(MODIFIER||299||401|CG32195|protein_coding|CODING|FBtr0075125|4|1);DOWNSTREAM(MODIFIER||84||401|CG32195|protein_coding|CODING|FBtr0333696||1);DOWNSTREAM(MODIFIER||84||401|CG32195|protein_coding|CODING|FBtr0333697||1);INTRON(MODIFIER||||357|CG7341|protein_coding|CODING|FBtr0075124|1|1);INTRON(MODIFI…	This gene is referred to in FlyBase by the symbol Dmel\CG7341 (FBgn0036777). It is a protein_coding_gene from Drosophila melanogaster. It has 2 annotated transcripts and 2 polypeptides (1 unique). Gene sequence location is 3L:18112959..18121003. It has the cytological map location 75B10. Its molecular function is unknown. The biological processes in which it is involved are not known. 7 alleles a…
FBgn0052195	3L_18109159_SNP	A	G	0.1395	24	148	1.73e-06	0.0590689	SiteClass[FBgn0036777|CG7341|INTRON|0;FBgn0052195|CG32195|DOWNSTREAM|84],TranscriptAnnot[UTR_3_PRIME(MODIFIER||299||401|CG32195|protein_coding|CODING|FBtr0075125|4|1);DOWNSTREAM(MODIFIER||84||401|CG32195|protein_coding|CODING|FBtr0333696||1);DOWNSTREAM(MODIFIER||84||401|CG32195|protein_coding|CODING|FBtr0333697||1);INTRON(MODIFIER||||357|CG7341|protein_coding|CODING|FBtr0075124|1|1);INTRON(MODIFI…	This gene is referred to in FlyBase by the symbol Dmel\CG32195 (FBgn0052195). It is a protein_coding_gene from Drosophila melanogaster. It has 3 annotated transcripts and 3 polypeptides (1 unique). Gene sequence location is 3L:18112959..18119150. It has the cytological map location 75B10. Protein features are: CHK kinase-like; Protein kinase-like domain; Protein of unknown function DUF227. Its mo…
FBtr0075125	3L_18109159_SNP	A	G	0.1395	24	148	1.73e-06	0.0590689	SiteClass[FBgn0036777|CG7341|INTRON|0;FBgn0052195|CG32195|DOWNSTREAM|84],TranscriptAnnot[UTR_3_PRIME(MODIFIER||299||401|CG32195|protein_coding|CODING|FBtr0075125|4|1);DOWNSTREAM(MODIFIER||84||401|CG32195|protein_coding|CODING|FBtr0333696||1);DOWNSTREAM(MODIFIER||84||401|CG32195|protein_coding|CODING|FBtr0333697||1);INTRON(MODIFIER||||357|CG7341|protein_coding|CODING|FBtr0075124|1|1);INTRON(MODIFI…	-
FBtr0333696	3L_18109159_SNP	A	G	0.1395	24	148	1.73e-06	0.0590689	SiteClass[FBgn0036777|CG7341|INTRON|0;FBgn0052195|CG32195|DOWNSTREAM|84],TranscriptAnnot[UTR_3_PRIME(MODIFIER||299||401|CG32195|protein_coding|CODING|FBtr0075125|4|1);DOWNSTREAM(MODIFIER||84||401|CG32195|protein_coding|CODING|FBtr0333696||1);DOWNSTREAM(MODIFIER||84||401|CG32195|protein_coding|CODING|FBtr0333697||1);INTRON(MODIFIER||||357|CG7341|protein_coding|CODING|FBtr0075124|1|1);INTRON(MODIFI…	-
FBtr0333697	3L_18109159_SNP	A	G	0.1395	24	148	1.73e-06	0.0590689	SiteClass[FBgn0036777|CG7341|INTRON|0;FBgn0052195|CG32195|DOWNSTREAM|84],TranscriptAnnot[UTR_3_PRIME(MODIFIER||299||401|CG32195|protein_coding|CODING|FBtr0075125|4|1);DOWNSTREAM(MODIFIER||84||401|CG32195|protein_coding|CODING|FBtr0333696||1);DOWNSTREAM(MODIFIER||84||401|CG32195|protein_coding|CODING|FBtr0333697||1);INTRON(MODIFIER||||357|CG7341|protein_coding|CODING|FBtr0075124|1|1);INTRON(MODIFI…	-
FBtr0075124	3L_18109159_SNP	A	G	0.1395	24	148	1.73e-06	0.0590689	SiteClass[FBgn0036777|CG7341|INTRON|0;FBgn0052195|CG32195|DOWNSTREAM|84],TranscriptAnnot[UTR_3_PRIME(MODIFIER||299||401|CG32195|protein_coding|CODING|FBtr0075125|4|1);DOWNSTREAM(MODIFIER||84||401|CG32195|protein_coding|CODING|FBtr0333696||1);DOWNSTREAM(MODIFIER||84||401|CG32195|protein_coding|CODING|FBtr0333697||1);INTRON(MODIFIER||||357|CG7341|protein_coding|CODING|FBtr0075124|1|1);INTRON(MODIFI…	-
FBtr0075123	3L_18109159_SNP	A	G	0.1395	24	148	1.73e-06	0.0590689	SiteClass[FBgn0036777|CG7341|INTRON|0;FBgn0052195|CG32195|DOWNSTREAM|84],TranscriptAnnot[UTR_3_PRIME(MODIFIER||299||401|CG32195|protein_coding|CODING|FBtr0075125|4|1);DOWNSTREAM(MODIFIER||84||401|CG32195|protein_coding|CODING|FBtr0333696||1);DOWNSTREAM(MODIFIER||84||401|CG32195|protein_coding|CODING|FBtr0333697||1);INTRON(MODIFIER||||357|CG7341|protein_coding|CODING|FBtr0075124|1|1);INTRON(MODIFI…	-
FBgn0002901	3L_18102818_SNP	T	C	0.1379	24	150	1.75e-06	0.0590689	SiteClass[FBgn0002901|mus304|UPSTREAM|96;FBgn0036775|CG5147|UPSTREAM|144],TranscriptAnnot[UPSTREAM(MODIFIER||96||846|mus304|protein_coding|CODING|FBtr0075122||1);UPSTREAM(MODIFIER||144||415|CG5147|protein_coding|CODING|FBtr0075136||1);INTERGENIC(MODIFIER||||||||||1)]	The gene mutagen-sensitive 304 is referred to in FlyBase by the symbol Dmel\mus304 (CG7347, FBgn0002901). It is a protein_coding_gene from Drosophila melanogaster. It has one annotated transcript and one polypeptide. Gene sequence location is 3L:18109814..18112847. It has the cytological map location 75B9-75B10. Its molecular function is described by: ATP-dependent DNA helicase activity. It is in…
FBgn0036775	3L_18102818_SNP	T	C	0.1379	24	150	1.75e-06	0.0590689	SiteClass[FBgn0002901|mus304|UPSTREAM|96;FBgn0036775|CG5147|UPSTREAM|144],TranscriptAnnot[UPSTREAM(MODIFIER||96||846|mus304|protein_coding|CODING|FBtr0075122||1);UPSTREAM(MODIFIER||144||415|CG5147|protein_coding|CODING|FBtr0075136||1);INTERGENIC(MODIFIER||||||||||1)]	This gene is referred to in FlyBase by the symbol Dmel\CG5147 (FBgn0036775). It is a protein_coding_gene from Drosophila melanogaster. It has one annotated transcript and one polypeptide. Gene sequence location is 3L:18107848..18109574. It has the cytological map location 75B9. Protein features are: DNA-directed RNA polymerase III subunit RPC4. Its molecular function is described by: DNA-directed…
FBtr0075122	3L_18102818_SNP	T	C	0.1379	24	150	1.75e-06	0.0590689	SiteClass[FBgn0002901|mus304|UPSTREAM|96;FBgn0036775|CG5147|UPSTREAM|144],TranscriptAnnot[UPSTREAM(MODIFIER||96||846|mus304|protein_coding|CODING|FBtr0075122||1);UPSTREAM(MODIFIER||144||415|CG5147|protein_coding|CODING|FBtr0075136||1);INTERGENIC(MODIFIER||||||||||1)]	-
FBtr0075136	3L_18102818_SNP	T	C	0.1379	24	150	1.75e-06	0.0590689	SiteClass[FBgn0002901|mus304|UPSTREAM|96;FBgn0036775|CG5147|UPSTREAM|144],TranscriptAnnot[UPSTREAM(MODIFIER||96||846|mus304|protein_coding|CODING|FBtr0075122||1);UPSTREAM(MODIFIER||144||415|CG5147|protein_coding|CODING|FBtr0075136||1);INTERGENIC(MODIFIER||||||||||1)]	-
FBgn0033802	2R_9075178_SNP	T	A	0.05143	9	166	1.79e-06	0.0590689	SiteClass[FBgn0033802|CG17724|INTRON|0;FBgn0053182|Kdm4B|SYNONYMOUS_CODING|0;FBgn0028991|seq|INTRON|0],TranscriptAnnot[SYNONYMOUS_CODING(LOW|SILENT|cgT/cgA|R51|590|Kdm4B|protein_coding|CODING|FBtr0087770|2|1);SYNONYMOUS_CODING(LOW|SILENT|cgT/cgA|R51|590|Kdm4B|protein_coding|CODING|FBtr0302054|3|1);SYNONYMOUS_CODING(LOW|SILENT|cgT/cgA|R51|717|Kdm4B|protein_coding|CODING|FBtr0310498|2|1);SYNONYMOUS…	This gene is referred to in FlyBase by the symbol Dmel\CG17724 (FBgn0033802). It is a protein_coding_gene from Drosophila melanogaster. It has 5 annotated transcripts and 5 polypeptides (2 unique). Gene sequence location is 2R:13176094..13190086. It has the cytological map location 49F4-49F7. Its molecular function is unknown. The biological processes in which it is involved are not known. 5 alle…
FBgn0053182	2R_9075178_SNP	T	A	0.05143	9	166	1.79e-06	0.0590689	SiteClass[FBgn0033802|CG17724|INTRON|0;FBgn0053182|Kdm4B|SYNONYMOUS_CODING|0;FBgn0028991|seq|INTRON|0],TranscriptAnnot[SYNONYMOUS_CODING(LOW|SILENT|cgT/cgA|R51|590|Kdm4B|protein_coding|CODING|FBtr0087770|2|1);SYNONYMOUS_CODING(LOW|SILENT|cgT/cgA|R51|590|Kdm4B|protein_coding|CODING|FBtr0302054|3|1);SYNONYMOUS_CODING(LOW|SILENT|cgT/cgA|R51|717|Kdm4B|protein_coding|CODING|FBtr0310498|2|1);SYNONYMOUS…	The gene Lysine (K)-specific demethylase 4B is referred to in FlyBase by the symbol Dmel\Kdm4B (CG33182, FBgn0053182). It is a protein_coding_gene from Drosophila melanogaster. It has 5 annotated transcripts and 5 polypeptides (2 unique). Gene sequence location is 2R:13176553..13198337. It has the cytological map location 49F4-49F7. Protein features are: JmjC domain; JmjN domain. Its molecular fu…
FBgn0028991	2R_9075178_SNP	T	A	0.05143	9	166	1.79e-06	0.0590689	SiteClass[FBgn0033802|CG17724|INTRON|0;FBgn0053182|Kdm4B|SYNONYMOUS_CODING|0;FBgn0028991|seq|INTRON|0],TranscriptAnnot[SYNONYMOUS_CODING(LOW|SILENT|cgT/cgA|R51|590|Kdm4B|protein_coding|CODING|FBtr0087770|2|1);SYNONYMOUS_CODING(LOW|SILENT|cgT/cgA|R51|590|Kdm4B|protein_coding|CODING|FBtr0302054|3|1);SYNONYMOUS_CODING(LOW|SILENT|cgT/cgA|R51|717|Kdm4B|protein_coding|CODING|FBtr0310498|2|1);SYNONYMOUS…	The gene sequoia is referred to in FlyBase by the symbol Dmel\seq (CG32904, FBgn0028991). It is a protein_coding_gene from Drosophila melanogaster. It has 2 annotated transcripts and 2 polypeptides (all unique). Gene sequence location is 2R:13176553..13190086. It has the cytological map location 49F4-49F7. Protein features are: Zinc finger C2H2-type/integrase DNA-binding domain; Zinc finger, C2H2…
FBtr0087770	2R_9075178_SNP	T	A	0.05143	9	166	1.79e-06	0.0590689	SiteClass[FBgn0033802|CG17724|INTRON|0;FBgn0053182|Kdm4B|SYNONYMOUS_CODING|0;FBgn0028991|seq|INTRON|0],TranscriptAnnot[SYNONYMOUS_CODING(LOW|SILENT|cgT/cgA|R51|590|Kdm4B|protein_coding|CODING|FBtr0087770|2|1);SYNONYMOUS_CODING(LOW|SILENT|cgT/cgA|R51|590|Kdm4B|protein_coding|CODING|FBtr0302054|3|1);SYNONYMOUS_CODING(LOW|SILENT|cgT/cgA|R51|717|Kdm4B|protein_coding|CODING|FBtr0310498|2|1);SYNONYMOUS…	-
FBtr0302054	2R_9075178_SNP	T	A	0.05143	9	166	1.79e-06	0.0590689	SiteClass[FBgn0033802|CG17724|INTRON|0;FBgn0053182|Kdm4B|SYNONYMOUS_CODING|0;FBgn0028991|seq|INTRON|0],TranscriptAnnot[SYNONYMOUS_CODING(LOW|SILENT|cgT/cgA|R51|590|Kdm4B|protein_coding|CODING|FBtr0087770|2|1);SYNONYMOUS_CODING(LOW|SILENT|cgT/cgA|R51|590|Kdm4B|protein_coding|CODING|FBtr0302054|3|1);SYNONYMOUS_CODING(LOW|SILENT|cgT/cgA|R51|717|Kdm4B|protein_coding|CODING|FBtr0310498|2|1);SYNONYMOUS…	-
FBtr0310498	2R_9075178_SNP	T	A	0.05143	9	166	1.79e-06	0.0590689	SiteClass[FBgn0033802|CG17724|INTRON|0;FBgn0053182|Kdm4B|SYNONYMOUS_CODING|0;FBgn0028991|seq|INTRON|0],TranscriptAnnot[SYNONYMOUS_CODING(LOW|SILENT|cgT/cgA|R51|590|Kdm4B|protein_coding|CODING|FBtr0087770|2|1);SYNONYMOUS_CODING(LOW|SILENT|cgT/cgA|R51|590|Kdm4B|protein_coding|CODING|FBtr0302054|3|1);SYNONYMOUS_CODING(LOW|SILENT|cgT/cgA|R51|717|Kdm4B|protein_coding|CODING|FBtr0310498|2|1);SYNONYMOUS…	-
FBtr0302052	2R_9075178_SNP	T	A	0.05143	9	166	1.79e-06	0.0590689	SiteClass[FBgn0033802|CG17724|INTRON|0;FBgn0053182|Kdm4B|SYNONYMOUS_CODING|0;FBgn0028991|seq|INTRON|0],TranscriptAnnot[SYNONYMOUS_CODING(LOW|SILENT|cgT/cgA|R51|590|Kdm4B|protein_coding|CODING|FBtr0087770|2|1);SYNONYMOUS_CODING(LOW|SILENT|cgT/cgA|R51|590|Kdm4B|protein_coding|CODING|FBtr0302054|3|1);SYNONYMOUS_CODING(LOW|SILENT|cgT/cgA|R51|717|Kdm4B|protein_coding|CODING|FBtr0310498|2|1);SYNONYMOUS…	-
FBtr0302053	2R_9075178_SNP	T	A	0.05143	9	166	1.79e-06	0.0590689	SiteClass[FBgn0033802|CG17724|INTRON|0;FBgn0053182|Kdm4B|SYNONYMOUS_CODING|0;FBgn0028991|seq|INTRON|0],TranscriptAnnot[SYNONYMOUS_CODING(LOW|SILENT|cgT/cgA|R51|590|Kdm4B|protein_coding|CODING|FBtr0087770|2|1);SYNONYMOUS_CODING(LOW|SILENT|cgT/cgA|R51|590|Kdm4B|protein_coding|CODING|FBtr0302054|3|1);SYNONYMOUS_CODING(LOW|SILENT|cgT/cgA|R51|717|Kdm4B|protein_coding|CODING|FBtr0310498|2|1);SYNONYMOUS…	-
FBtr0334468	2R_9075178_SNP	T	A	0.05143	9	166	1.79e-06	0.0590689	SiteClass[FBgn0033802|CG17724|INTRON|0;FBgn0053182|Kdm4B|SYNONYMOUS_CODING|0;FBgn0028991|seq|INTRON|0],TranscriptAnnot[SYNONYMOUS_CODING(LOW|SILENT|cgT/cgA|R51|590|Kdm4B|protein_coding|CODING|FBtr0087770|2|1);SYNONYMOUS_CODING(LOW|SILENT|cgT/cgA|R51|590|Kdm4B|protein_coding|CODING|FBtr0302054|3|1);SYNONYMOUS_CODING(LOW|SILENT|cgT/cgA|R51|717|Kdm4B|protein_coding|CODING|FBtr0310498|2|1);SYNONYMOUS…	-
FBtr0100501	2R_9075178_SNP	T	A	0.05143	9	166	1.79e-06	0.0590689	SiteClass[FBgn0033802|CG17724|INTRON|0;FBgn0053182|Kdm4B|SYNONYMOUS_CODING|0;FBgn0028991|seq|INTRON|0],TranscriptAnnot[SYNONYMOUS_CODING(LOW|SILENT|cgT/cgA|R51|590|Kdm4B|protein_coding|CODING|FBtr0087770|2|1);SYNONYMOUS_CODING(LOW|SILENT|cgT/cgA|R51|590|Kdm4B|protein_coding|CODING|FBtr0302054|3|1);SYNONYMOUS_CODING(LOW|SILENT|cgT/cgA|R51|717|Kdm4B|protein_coding|CODING|FBtr0310498|2|1);SYNONYMOUS…	-
FBtr0344197	2R_9075178_SNP	T	A	0.05143	9	166	1.79e-06	0.0590689	SiteClass[FBgn0033802|CG17724|INTRON|0;FBgn0053182|Kdm4B|SYNONYMOUS_CODING|0;FBgn0028991|seq|INTRON|0],TranscriptAnnot[SYNONYMOUS_CODING(LOW|SILENT|cgT/cgA|R51|590|Kdm4B|protein_coding|CODING|FBtr0087770|2|1);SYNONYMOUS_CODING(LOW|SILENT|cgT/cgA|R51|590|Kdm4B|protein_coding|CODING|FBtr0302054|3|1);SYNONYMOUS_CODING(LOW|SILENT|cgT/cgA|R51|717|Kdm4B|protein_coding|CODING|FBtr0310498|2|1);SYNONYMOUS…	-
FBtr0344198	2R_9075178_SNP	T	A	0.05143	9	166	1.79e-06	0.0590689	SiteClass[FBgn0033802|CG17724|INTRON|0;FBgn0053182|Kdm4B|SYNONYMOUS_CODING|0;FBgn0028991|seq|INTRON|0],TranscriptAnnot[SYNONYMOUS_CODING(LOW|SILENT|cgT/cgA|R51|590|Kdm4B|protein_coding|CODING|FBtr0087770|2|1);SYNONYMOUS_CODING(LOW|SILENT|cgT/cgA|R51|590|Kdm4B|protein_coding|CODING|FBtr0302054|3|1);SYNONYMOUS_CODING(LOW|SILENT|cgT/cgA|R51|717|Kdm4B|protein_coding|CODING|FBtr0310498|2|1);SYNONYMOUS…	-
FBgn0034911	2R_19707950_DEL	C	CTTAAC	0.05143	9	166	1.81e-06	0.0590689	SiteClass[FBgn0034911|CG5549|UTR_5_PRIME|0],TranscriptAnnot[UTR_5_PRIME(MODIFIER||9564||1188|CG5549|protein_coding|CODING|FBtr0301162|1|1)]	This gene is referred to in FlyBase by the symbol Dmel\CG5549 (FBgn0034911). It is a protein_coding_gene from Drosophila melanogaster. It has one annotated transcript and one polypeptide. Gene sequence location is 2R:23820354..23839864. It has the cytological map location 60A2-60A3. Protein features are: Sodium:neurotransmitter symporter. Its molecular function is described by: neurotransmitter:s…
FBtr0301162	2R_19707950_DEL	C	CTTAAC	0.05143	9	166	1.81e-06	0.0590689	SiteClass[FBgn0034911|CG5549|UTR_5_PRIME|0],TranscriptAnnot[UTR_5_PRIME(MODIFIER||9564||1188|CG5549|protein_coding|CODING|FBtr0301162|1|1)]	-
FBgn0266815	2R_10320546_SNP	C	A	0.09357	16	155	1.84e-06	0.0590689	SiteClass[FBgn0266815|CR45277|DOWNSTREAM|389;FBgn0013725|phyl|UPSTREAM|704],TranscriptAnnot[UPSTREAM(MODIFIER||704||400|phyl|protein_coding|CODING|FBtr0087516||1);DOWNSTREAM(MODIFIER||389|||CR45277|ncRNA|NON_CODING|FBtr0345531||1);INTERGENIC(MODIFIER||||||||||1)]	This gene is referred to in FlyBase by the symbol Dmel\CR45277 (FBgn0266815). It is a non_protein_coding_gene from Drosophila melanogaster. It has one annotated transcript. Gene sequence location is 2R:14433430..14433895. It has the cytological map location 51A2. Its molecular function is unknown. The biological processes in which it is involved are not known. No alleles are reported.
FBgn0013725	2R_10320546_SNP	C	A	0.09357	16	155	1.84e-06	0.0590689	SiteClass[FBgn0266815|CR45277|DOWNSTREAM|389;FBgn0013725|phyl|UPSTREAM|704],TranscriptAnnot[UPSTREAM(MODIFIER||704||400|phyl|protein_coding|CODING|FBtr0087516||1);DOWNSTREAM(MODIFIER||389|||CR45277|ncRNA|NON_CODING|FBtr0345531||1);INTERGENIC(MODIFIER||||||||||1)]	The gene phyllopod is referred to in FlyBase by the symbol Dmel\phyl (CG10108, FBgn0013725). It is a protein_coding_gene from Drosophila melanogaster. It has one annotated transcript and one polypeptide. Gene sequence location is 2R:14427336..14432337. It has the cytological map location 51A2. Its molecular function is described by: protein binding, bridging; binding, bridging; protein self-assoc…
FBtr0087516	2R_10320546_SNP	C	A	0.09357	16	155	1.84e-06	0.0590689	SiteClass[FBgn0266815|CR45277|DOWNSTREAM|389;FBgn0013725|phyl|UPSTREAM|704],TranscriptAnnot[UPSTREAM(MODIFIER||704||400|phyl|protein_coding|CODING|FBtr0087516||1);DOWNSTREAM(MODIFIER||389|||CR45277|ncRNA|NON_CODING|FBtr0345531||1);INTERGENIC(MODIFIER||||||||||1)]	-
FBtr0345531	2R_10320546_SNP	C	A	0.09357	16	155	1.84e-06	0.0590689	SiteClass[FBgn0266815|CR45277|DOWNSTREAM|389;FBgn0013725|phyl|UPSTREAM|704],TranscriptAnnot[UPSTREAM(MODIFIER||704||400|phyl|protein_coding|CODING|FBtr0087516||1);DOWNSTREAM(MODIFIER||389|||CR45277|ncRNA|NON_CODING|FBtr0345531||1);INTERGENIC(MODIFIER||||||||||1)]	-
FBgn0262617	3R_6099893_SNP	A	G	0.05587	10	169	1.85e-06	0.0590689	SiteClass[FBgn0262617|CG43143|INTRON|0],TranscriptAnnot[INTRON(MODIFIER||||1180|CG43143|protein_coding|CODING|FBtr0305351|1|1);INTRON(MODIFIER||||1427|CG43143|protein_coding|CODING|FBtr0305354|1|1);INTRON(MODIFIER||||1532|CG43143|protein_coding|CODING|FBtr0305356|1|1);INTRON(MODIFIER||||2556|CG43143|protein_coding|CODING|FBtr0337050|1|1)]	This gene is referred to in FlyBase by the symbol Dmel\CG43143 (FBgn0262617). It is a protein_coding_gene from Drosophila melanogaster. It has 9 annotated transcripts and 9 polypeptides (7 unique). Gene sequence location is 3R:10264306..10308467. It has the cytological map location 86A7. Protein features are: Protein kinase domain; Protein kinase, ATP binding site; Protein kinase-like domain; Ser…
FBtr0305351	3R_6099893_SNP	A	G	0.05587	10	169	1.85e-06	0.0590689	SiteClass[FBgn0262617|CG43143|INTRON|0],TranscriptAnnot[INTRON(MODIFIER||||1180|CG43143|protein_coding|CODING|FBtr0305351|1|1);INTRON(MODIFIER||||1427|CG43143|protein_coding|CODING|FBtr0305354|1|1);INTRON(MODIFIER||||1532|CG43143|protein_coding|CODING|FBtr0305356|1|1);INTRON(MODIFIER||||2556|CG43143|protein_coding|CODING|FBtr0337050|1|1)]	-
FBtr0305354	3R_6099893_SNP	A	G	0.05587	10	169	1.85e-06	0.0590689	SiteClass[FBgn0262617|CG43143|INTRON|0],TranscriptAnnot[INTRON(MODIFIER||||1180|CG43143|protein_coding|CODING|FBtr0305351|1|1);INTRON(MODIFIER||||1427|CG43143|protein_coding|CODING|FBtr0305354|1|1);INTRON(MODIFIER||||1532|CG43143|protein_coding|CODING|FBtr0305356|1|1);INTRON(MODIFIER||||2556|CG43143|protein_coding|CODING|FBtr0337050|1|1)]	-
FBtr0305356	3R_6099893_SNP	A	G	0.05587	10	169	1.85e-06	0.0590689	SiteClass[FBgn0262617|CG43143|INTRON|0],TranscriptAnnot[INTRON(MODIFIER||||1180|CG43143|protein_coding|CODING|FBtr0305351|1|1);INTRON(MODIFIER||||1427|CG43143|protein_coding|CODING|FBtr0305354|1|1);INTRON(MODIFIER||||1532|CG43143|protein_coding|CODING|FBtr0305356|1|1);INTRON(MODIFIER||||2556|CG43143|protein_coding|CODING|FBtr0337050|1|1)]	-
FBtr0337050	3R_6099893_SNP	A	G	0.05587	10	169	1.85e-06	0.0590689	SiteClass[FBgn0262617|CG43143|INTRON|0],TranscriptAnnot[INTRON(MODIFIER||||1180|CG43143|protein_coding|CODING|FBtr0305351|1|1);INTRON(MODIFIER||||1427|CG43143|protein_coding|CODING|FBtr0305354|1|1);INTRON(MODIFIER||||1532|CG43143|protein_coding|CODING|FBtr0305356|1|1);INTRON(MODIFIER||||2556|CG43143|protein_coding|CODING|FBtr0337050|1|1)]	-
FBgn0262617	3R_6094882_SNP	T	C	0.05028	9	170	2.08e-06	0.064231	SiteClass[FBgn0262617|CG43143|INTRON|0],TranscriptAnnot[INTRON(MODIFIER||||1180|CG43143|protein_coding|CODING|FBtr0305351|1|1);INTRON(MODIFIER||||1427|CG43143|protein_coding|CODING|FBtr0305354|1|1);INTRON(MODIFIER||||1532|CG43143|protein_coding|CODING|FBtr0305356|1|1);INTRON(MODIFIER||||2556|CG43143|protein_coding|CODING|FBtr0337050|1|1)]	This gene is referred to in FlyBase by the symbol Dmel\CG43143 (FBgn0262617). It is a protein_coding_gene from Drosophila melanogaster. It has 9 annotated transcripts and 9 polypeptides (7 unique). Gene sequence location is 3R:10264306..10308467. It has the cytological map location 86A7. Protein features are: Protein kinase domain; Protein kinase, ATP binding site; Protein kinase-like domain; Ser…
FBtr0305351	3R_6094882_SNP	T	C	0.05028	9	170	2.08e-06	0.064231	SiteClass[FBgn0262617|CG43143|INTRON|0],TranscriptAnnot[INTRON(MODIFIER||||1180|CG43143|protein_coding|CODING|FBtr0305351|1|1);INTRON(MODIFIER||||1427|CG43143|protein_coding|CODING|FBtr0305354|1|1);INTRON(MODIFIER||||1532|CG43143|protein_coding|CODING|FBtr0305356|1|1);INTRON(MODIFIER||||2556|CG43143|protein_coding|CODING|FBtr0337050|1|1)]	-
FBtr0305354	3R_6094882_SNP	T	C	0.05028	9	170	2.08e-06	0.064231	SiteClass[FBgn0262617|CG43143|INTRON|0],TranscriptAnnot[INTRON(MODIFIER||||1180|CG43143|protein_coding|CODING|FBtr0305351|1|1);INTRON(MODIFIER||||1427|CG43143|protein_coding|CODING|FBtr0305354|1|1);INTRON(MODIFIER||||1532|CG43143|protein_coding|CODING|FBtr0305356|1|1);INTRON(MODIFIER||||2556|CG43143|protein_coding|CODING|FBtr0337050|1|1)]	-
FBtr0305356	3R_6094882_SNP	T	C	0.05028	9	170	2.08e-06	0.064231	SiteClass[FBgn0262617|CG43143|INTRON|0],TranscriptAnnot[INTRON(MODIFIER||||1180|CG43143|protein_coding|CODING|FBtr0305351|1|1);INTRON(MODIFIER||||1427|CG43143|protein_coding|CODING|FBtr0305354|1|1);INTRON(MODIFIER||||1532|CG43143|protein_coding|CODING|FBtr0305356|1|1);INTRON(MODIFIER||||2556|CG43143|protein_coding|CODING|FBtr0337050|1|1)]	-
FBtr0337050	3R_6094882_SNP	T	C	0.05028	9	170	2.08e-06	0.064231	SiteClass[FBgn0262617|CG43143|INTRON|0],TranscriptAnnot[INTRON(MODIFIER||||1180|CG43143|protein_coding|CODING|FBtr0305351|1|1);INTRON(MODIFIER||||1427|CG43143|protein_coding|CODING|FBtr0305354|1|1);INTRON(MODIFIER||||1532|CG43143|protein_coding|CODING|FBtr0305356|1|1);INTRON(MODIFIER||||2556|CG43143|protein_coding|CODING|FBtr0337050|1|1)]	-
FBgn0036777	3L_18109183_SNP	A	G	0.1353	23	147	2.26e-06	0.0667862	SiteClass[FBgn0036777|CG7341|INTRON|0;FBgn0052195|CG32195|DOWNSTREAM|108],TranscriptAnnot[UTR_3_PRIME(MODIFIER||323||401|CG32195|protein_coding|CODING|FBtr0075125|4|1);DOWNSTREAM(MODIFIER||108||401|CG32195|protein_coding|CODING|FBtr0333696||1);DOWNSTREAM(MODIFIER||108||401|CG32195|protein_coding|CODING|FBtr0333697||1);INTRON(MODIFIER||||357|CG7341|protein_coding|CODING|FBtr0075124|1|1);INTRON(MOD…	This gene is referred to in FlyBase by the symbol Dmel\CG7341 (FBgn0036777). It is a protein_coding_gene from Drosophila melanogaster. It has 2 annotated transcripts and 2 polypeptides (1 unique). Gene sequence location is 3L:18112959..18121003. It has the cytological map location 75B10. Its molecular function is unknown. The biological processes in which it is involved are not known. 7 alleles a…
FBgn0052195	3L_18109183_SNP	A	G	0.1353	23	147	2.26e-06	0.0667862	SiteClass[FBgn0036777|CG7341|INTRON|0;FBgn0052195|CG32195|DOWNSTREAM|108],TranscriptAnnot[UTR_3_PRIME(MODIFIER||323||401|CG32195|protein_coding|CODING|FBtr0075125|4|1);DOWNSTREAM(MODIFIER||108||401|CG32195|protein_coding|CODING|FBtr0333696||1);DOWNSTREAM(MODIFIER||108||401|CG32195|protein_coding|CODING|FBtr0333697||1);INTRON(MODIFIER||||357|CG7341|protein_coding|CODING|FBtr0075124|1|1);INTRON(MOD…	This gene is referred to in FlyBase by the symbol Dmel\CG32195 (FBgn0052195). It is a protein_coding_gene from Drosophila melanogaster. It has 3 annotated transcripts and 3 polypeptides (1 unique). Gene sequence location is 3L:18112959..18119150. It has the cytological map location 75B10. Protein features are: CHK kinase-like; Protein kinase-like domain; Protein of unknown function DUF227. Its mo…
FBtr0075125	3L_18109183_SNP	A	G	0.1353	23	147	2.26e-06	0.0667862	SiteClass[FBgn0036777|CG7341|INTRON|0;FBgn0052195|CG32195|DOWNSTREAM|108],TranscriptAnnot[UTR_3_PRIME(MODIFIER||323||401|CG32195|protein_coding|CODING|FBtr0075125|4|1);DOWNSTREAM(MODIFIER||108||401|CG32195|protein_coding|CODING|FBtr0333696||1);DOWNSTREAM(MODIFIER||108||401|CG32195|protein_coding|CODING|FBtr0333697||1);INTRON(MODIFIER||||357|CG7341|protein_coding|CODING|FBtr0075124|1|1);INTRON(MOD…	-
FBtr0333696	3L_18109183_SNP	A	G	0.1353	23	147	2.26e-06	0.0667862	SiteClass[FBgn0036777|CG7341|INTRON|0;FBgn0052195|CG32195|DOWNSTREAM|108],TranscriptAnnot[UTR_3_PRIME(MODIFIER||323||401|CG32195|protein_coding|CODING|FBtr0075125|4|1);DOWNSTREAM(MODIFIER||108||401|CG32195|protein_coding|CODING|FBtr0333696||1);DOWNSTREAM(MODIFIER||108||401|CG32195|protein_coding|CODING|FBtr0333697||1);INTRON(MODIFIER||||357|CG7341|protein_coding|CODING|FBtr0075124|1|1);INTRON(MOD…	-
FBtr0333697	3L_18109183_SNP	A	G	0.1353	23	147	2.26e-06	0.0667862	SiteClass[FBgn0036777|CG7341|INTRON|0;FBgn0052195|CG32195|DOWNSTREAM|108],TranscriptAnnot[UTR_3_PRIME(MODIFIER||323||401|CG32195|protein_coding|CODING|FBtr0075125|4|1);DOWNSTREAM(MODIFIER||108||401|CG32195|protein_coding|CODING|FBtr0333696||1);DOWNSTREAM(MODIFIER||108||401|CG32195|protein_coding|CODING|FBtr0333697||1);INTRON(MODIFIER||||357|CG7341|protein_coding|CODING|FBtr0075124|1|1);INTRON(MOD…	-
FBtr0075124	3L_18109183_SNP	A	G	0.1353	23	147	2.26e-06	0.0667862	SiteClass[FBgn0036777|CG7341|INTRON|0;FBgn0052195|CG32195|DOWNSTREAM|108],TranscriptAnnot[UTR_3_PRIME(MODIFIER||323||401|CG32195|protein_coding|CODING|FBtr0075125|4|1);DOWNSTREAM(MODIFIER||108||401|CG32195|protein_coding|CODING|FBtr0333696||1);DOWNSTREAM(MODIFIER||108||401|CG32195|protein_coding|CODING|FBtr0333697||1);INTRON(MODIFIER||||357|CG7341|protein_coding|CODING|FBtr0075124|1|1);INTRON(MOD…	-
FBtr0075123	3L_18109183_SNP	A	G	0.1353	23	147	2.26e-06	0.0667862	SiteClass[FBgn0036777|CG7341|INTRON|0;FBgn0052195|CG32195|DOWNSTREAM|108],TranscriptAnnot[UTR_3_PRIME(MODIFIER||323||401|CG32195|protein_coding|CODING|FBtr0075125|4|1);DOWNSTREAM(MODIFIER||108||401|CG32195|protein_coding|CODING|FBtr0333696||1);DOWNSTREAM(MODIFIER||108||401|CG32195|protein_coding|CODING|FBtr0333697||1);INTRON(MODIFIER||||357|CG7341|protein_coding|CODING|FBtr0075124|1|1);INTRON(MOD…	-
FBgn0052676	X_10626654_SNP	A	T	0.06667	12	168	2.27e-06	0.0667862	SiteClass[FBgn0052676|CG32676|INTRON|0],TranscriptAnnot[INTRON(MODIFIER||||1122|CG32676|protein_coding|CODING|FBtr0071503|1|1);INTRON(MODIFIER||||1122|CG32676|protein_coding|CODING|FBtr0333017|1|1)]	This gene is referred to in FlyBase by the symbol Dmel\CG32676 (FBgn0052676). It is a protein_coding_gene from Drosophila melanogaster. It has 2 annotated transcripts and 2 polypeptides (1 unique). Gene sequence location is X:10711163..10744943. It has the cytological map location 9E1-9E2. Protein features are: Ubiquitin domain; Ubiquitin-related domain. Its molecular function is unknown. It is i…
FBtr0071503	X_10626654_SNP	A	T	0.06667	12	168	2.27e-06	0.0667862	SiteClass[FBgn0052676|CG32676|INTRON|0],TranscriptAnnot[INTRON(MODIFIER||||1122|CG32676|protein_coding|CODING|FBtr0071503|1|1);INTRON(MODIFIER||||1122|CG32676|protein_coding|CODING|FBtr0333017|1|1)]	-
FBtr0333017	X_10626654_SNP	A	T	0.06667	12	168	2.27e-06	0.0667862	SiteClass[FBgn0052676|CG32676|INTRON|0],TranscriptAnnot[INTRON(MODIFIER||||1122|CG32676|protein_coding|CODING|FBtr0071503|1|1);INTRON(MODIFIER||||1122|CG32676|protein_coding|CODING|FBtr0333017|1|1)]	-
FBgn0003339	3R_2658997_SNP	T	A	0.05848	10	161	2.3e-06	0.0667862	SiteClass[FBgn0003339|Scr|INTRON|0],TranscriptAnnot[INTRON(MODIFIER||||417|Scr|protein_coding|CODING|FBtr0081657|2|1);INTRON(MODIFIER||||417|Scr|protein_coding|CODING|FBtr0081658|2|1)]	The gene Sex combs reduced is referred to in FlyBase by the symbol Dmel\Scr (CG1030, FBgn0003339). It is a protein_coding_gene from Drosophila melanogaster. It has 2 annotated transcripts and 2 polypeptides (1 unique). Gene sequence location is 3R:6823120..6849981. It has the cytological map location 84A5. Protein features are: Homeobox domain; Homeobox protein, antennapedia type; Homeobox protei…
FBtr0081657	3R_2658997_SNP	T	A	0.05848	10	161	2.3e-06	0.0667862	SiteClass[FBgn0003339|Scr|INTRON|0],TranscriptAnnot[INTRON(MODIFIER||||417|Scr|protein_coding|CODING|FBtr0081657|2|1);INTRON(MODIFIER||||417|Scr|protein_coding|CODING|FBtr0081658|2|1)]	-
FBtr0081658	3R_2658997_SNP	T	A	0.05848	10	161	2.3e-06	0.0667862	SiteClass[FBgn0003339|Scr|INTRON|0],TranscriptAnnot[INTRON(MODIFIER||||417|Scr|protein_coding|CODING|FBtr0081657|2|1);INTRON(MODIFIER||||417|Scr|protein_coding|CODING|FBtr0081658|2|1)]	-
FBgn0051660	2L_4855970_SNP	G	C	0.05294	9	161	2.41e-06	0.0684097	SiteClass[FBgn0051660|pog|INTRON|0],TranscriptAnnot[INTRON(MODIFIER||||790|pog|protein_coding|CODING|FBtr0077388|2|1);INTRON(MODIFIER||||944|pog|protein_coding|CODING|FBtr0100301|2|1);INTRON(MODIFIER||||951|pog|protein_coding|CODING|FBtr0304909|2|1);INTRON(MODIFIER||||894|pog|protein_coding|CODING|FBtr0304910|2|1);INTRON(MODIFIER||||926|pog|protein_coding|CODING|FBtr0336831|2|1)]	The gene poor gastrulation is referred to in FlyBase by the symbol Dmel\pog (CG31660, FBgn0051660). It is a protein_coding_gene from Drosophila melanogaster. It has 5 annotated transcripts and 5 polypeptides (all unique). Gene sequence location is 2L:4852864..4876792. It has the cytological map location 25B1. Protein features are: GPCR family 3, C-terminal. Its molecular function is described by:…
FBtr0077388	2L_4855970_SNP	G	C	0.05294	9	161	2.41e-06	0.0684097	SiteClass[FBgn0051660|pog|INTRON|0],TranscriptAnnot[INTRON(MODIFIER||||790|pog|protein_coding|CODING|FBtr0077388|2|1);INTRON(MODIFIER||||944|pog|protein_coding|CODING|FBtr0100301|2|1);INTRON(MODIFIER||||951|pog|protein_coding|CODING|FBtr0304909|2|1);INTRON(MODIFIER||||894|pog|protein_coding|CODING|FBtr0304910|2|1);INTRON(MODIFIER||||926|pog|protein_coding|CODING|FBtr0336831|2|1)]	-
FBtr0100301	2L_4855970_SNP	G	C	0.05294	9	161	2.41e-06	0.0684097	SiteClass[FBgn0051660|pog|INTRON|0],TranscriptAnnot[INTRON(MODIFIER||||790|pog|protein_coding|CODING|FBtr0077388|2|1);INTRON(MODIFIER||||944|pog|protein_coding|CODING|FBtr0100301|2|1);INTRON(MODIFIER||||951|pog|protein_coding|CODING|FBtr0304909|2|1);INTRON(MODIFIER||||894|pog|protein_coding|CODING|FBtr0304910|2|1);INTRON(MODIFIER||||926|pog|protein_coding|CODING|FBtr0336831|2|1)]	-
FBtr0304909	2L_4855970_SNP	G	C	0.05294	9	161	2.41e-06	0.0684097	SiteClass[FBgn0051660|pog|INTRON|0],TranscriptAnnot[INTRON(MODIFIER||||790|pog|protein_coding|CODING|FBtr0077388|2|1);INTRON(MODIFIER||||944|pog|protein_coding|CODING|FBtr0100301|2|1);INTRON(MODIFIER||||951|pog|protein_coding|CODING|FBtr0304909|2|1);INTRON(MODIFIER||||894|pog|protein_coding|CODING|FBtr0304910|2|1);INTRON(MODIFIER||||926|pog|protein_coding|CODING|FBtr0336831|2|1)]	-
FBtr0304910	2L_4855970_SNP	G	C	0.05294	9	161	2.41e-06	0.0684097	SiteClass[FBgn0051660|pog|INTRON|0],TranscriptAnnot[INTRON(MODIFIER||||790|pog|protein_coding|CODING|FBtr0077388|2|1);INTRON(MODIFIER||||944|pog|protein_coding|CODING|FBtr0100301|2|1);INTRON(MODIFIER||||951|pog|protein_coding|CODING|FBtr0304909|2|1);INTRON(MODIFIER||||894|pog|protein_coding|CODING|FBtr0304910|2|1);INTRON(MODIFIER||||926|pog|protein_coding|CODING|FBtr0336831|2|1)]	-
FBtr0336831	2L_4855970_SNP	G	C	0.05294	9	161	2.41e-06	0.0684097	SiteClass[FBgn0051660|pog|INTRON|0],TranscriptAnnot[INTRON(MODIFIER||||790|pog|protein_coding|CODING|FBtr0077388|2|1);INTRON(MODIFIER||||944|pog|protein_coding|CODING|FBtr0100301|2|1);INTRON(MODIFIER||||951|pog|protein_coding|CODING|FBtr0304909|2|1);INTRON(MODIFIER||||894|pog|protein_coding|CODING|FBtr0304910|2|1);INTRON(MODIFIER||||926|pog|protein_coding|CODING|FBtr0336831|2|1)]	-
FBgn0052195	3L_18109060_SNP	T	G	0.1412	24	146	2.46e-06	0.0684144	SiteClass[FBgn0052195|CG32195|UTR_3_PRIME|0;FBgn0036777|CG7341|INTRON|0],TranscriptAnnot[UTR_3_PRIME(MODIFIER||200||401|CG32195|protein_coding|CODING|FBtr0333696|4|1);UTR_3_PRIME(MODIFIER||200||401|CG32195|protein_coding|CODING|FBtr0333697|3|1);UTR_3_PRIME(MODIFIER||200||401|CG32195|protein_coding|CODING|FBtr0075125|4|1);INTRON(MODIFIER||||357|CG7341|protein_coding|CODING|FBtr0075124|1|1);INTRON(…	This gene is referred to in FlyBase by the symbol Dmel\CG32195 (FBgn0052195). It is a protein_coding_gene from Drosophila melanogaster. It has 3 annotated transcripts and 3 polypeptides (1 unique). Gene sequence location is 3L:18112959..18119150. It has the cytological map location 75B10. Protein features are: CHK kinase-like; Protein kinase-like domain; Protein of unknown function DUF227. Its mo…
FBgn0036777	3L_18109060_SNP	T	G	0.1412	24	146	2.46e-06	0.0684144	SiteClass[FBgn0052195|CG32195|UTR_3_PRIME|0;FBgn0036777|CG7341|INTRON|0],TranscriptAnnot[UTR_3_PRIME(MODIFIER||200||401|CG32195|protein_coding|CODING|FBtr0333696|4|1);UTR_3_PRIME(MODIFIER||200||401|CG32195|protein_coding|CODING|FBtr0333697|3|1);UTR_3_PRIME(MODIFIER||200||401|CG32195|protein_coding|CODING|FBtr0075125|4|1);INTRON(MODIFIER||||357|CG7341|protein_coding|CODING|FBtr0075124|1|1);INTRON(…	This gene is referred to in FlyBase by the symbol Dmel\CG7341 (FBgn0036777). It is a protein_coding_gene from Drosophila melanogaster. It has 2 annotated transcripts and 2 polypeptides (1 unique). Gene sequence location is 3L:18112959..18121003. It has the cytological map location 75B10. Its molecular function is unknown. The biological processes in which it is involved are not known. 7 alleles a…
FBtr0333696	3L_18109060_SNP	T	G	0.1412	24	146	2.46e-06	0.0684144	SiteClass[FBgn0052195|CG32195|UTR_3_PRIME|0;FBgn0036777|CG7341|INTRON|0],TranscriptAnnot[UTR_3_PRIME(MODIFIER||200||401|CG32195|protein_coding|CODING|FBtr0333696|4|1);UTR_3_PRIME(MODIFIER||200||401|CG32195|protein_coding|CODING|FBtr0333697|3|1);UTR_3_PRIME(MODIFIER||200||401|CG32195|protein_coding|CODING|FBtr0075125|4|1);INTRON(MODIFIER||||357|CG7341|protein_coding|CODING|FBtr0075124|1|1);INTRON(…	-
FBtr0333697	3L_18109060_SNP	T	G	0.1412	24	146	2.46e-06	0.0684144	SiteClass[FBgn0052195|CG32195|UTR_3_PRIME|0;FBgn0036777|CG7341|INTRON|0],TranscriptAnnot[UTR_3_PRIME(MODIFIER||200||401|CG32195|protein_coding|CODING|FBtr0333696|4|1);UTR_3_PRIME(MODIFIER||200||401|CG32195|protein_coding|CODING|FBtr0333697|3|1);UTR_3_PRIME(MODIFIER||200||401|CG32195|protein_coding|CODING|FBtr0075125|4|1);INTRON(MODIFIER||||357|CG7341|protein_coding|CODING|FBtr0075124|1|1);INTRON(…	-
FBtr0075125	3L_18109060_SNP	T	G	0.1412	24	146	2.46e-06	0.0684144	SiteClass[FBgn0052195|CG32195|UTR_3_PRIME|0;FBgn0036777|CG7341|INTRON|0],TranscriptAnnot[UTR_3_PRIME(MODIFIER||200||401|CG32195|protein_coding|CODING|FBtr0333696|4|1);UTR_3_PRIME(MODIFIER||200||401|CG32195|protein_coding|CODING|FBtr0333697|3|1);UTR_3_PRIME(MODIFIER||200||401|CG32195|protein_coding|CODING|FBtr0075125|4|1);INTRON(MODIFIER||||357|CG7341|protein_coding|CODING|FBtr0075124|1|1);INTRON(…	-
FBtr0075124	3L_18109060_SNP	T	G	0.1412	24	146	2.46e-06	0.0684144	SiteClass[FBgn0052195|CG32195|UTR_3_PRIME|0;FBgn0036777|CG7341|INTRON|0],TranscriptAnnot[UTR_3_PRIME(MODIFIER||200||401|CG32195|protein_coding|CODING|FBtr0333696|4|1);UTR_3_PRIME(MODIFIER||200||401|CG32195|protein_coding|CODING|FBtr0333697|3|1);UTR_3_PRIME(MODIFIER||200||401|CG32195|protein_coding|CODING|FBtr0075125|4|1);INTRON(MODIFIER||||357|CG7341|protein_coding|CODING|FBtr0075124|1|1);INTRON(…	-
FBtr0075123	3L_18109060_SNP	T	G	0.1412	24	146	2.46e-06	0.0684144	SiteClass[FBgn0052195|CG32195|UTR_3_PRIME|0;FBgn0036777|CG7341|INTRON|0],TranscriptAnnot[UTR_3_PRIME(MODIFIER||200||401|CG32195|protein_coding|CODING|FBtr0333696|4|1);UTR_3_PRIME(MODIFIER||200||401|CG32195|protein_coding|CODING|FBtr0333697|3|1);UTR_3_PRIME(MODIFIER||200||401|CG32195|protein_coding|CODING|FBtr0075125|4|1);INTRON(MODIFIER||||357|CG7341|protein_coding|CODING|FBtr0075124|1|1);INTRON(…	-
FBgn0053057	3L_8396707_SNP	A	C	0.06322	11	163	2.5e-06	0.0684175	SiteClass[FBgn0053057|CG33057|UTR_3_PRIME|0;FBgn0035889|mkg-p|NON_SYNONYMOUS_CODING|0],TranscriptAnnot[NON_SYNONYMOUS_CODING(MODERATE|MISSENSE|Gcc/Tcc|A284S|659|mkg-p|protein_coding|CODING|FBtr0076664|3|1);NON_SYNONYMOUS_CODING(MODERATE|MISSENSE|Gcc/Tcc|A284S|659|mkg-p|protein_coding|CODING|FBtr0076665|2|1);NON_SYNONYMOUS_CODING(MODERATE|MISSENSE|Gcc/Tcc|A284S|659|mkg-p|protein_coding|CODING|FBtr…	This gene is referred to in FlyBase by the symbol Dmel\CG33057 (FBgn0053057). It is a protein_coding_gene from Drosophila melanogaster. It has 2 annotated transcripts and 2 polypeptides (1 unique). Gene sequence location is 3L:8402168..8405277. It has the cytological map location 66C11. Protein features are: Phosphotransferase KptA/Tpt1. Its molecular function is described by: transferase activit…
FBgn0035889	3L_8396707_SNP	A	C	0.06322	11	163	2.5e-06	0.0684175	SiteClass[FBgn0053057|CG33057|UTR_3_PRIME|0;FBgn0035889|mkg-p|NON_SYNONYMOUS_CODING|0],TranscriptAnnot[NON_SYNONYMOUS_CODING(MODERATE|MISSENSE|Gcc/Tcc|A284S|659|mkg-p|protein_coding|CODING|FBtr0076664|3|1);NON_SYNONYMOUS_CODING(MODERATE|MISSENSE|Gcc/Tcc|A284S|659|mkg-p|protein_coding|CODING|FBtr0076665|2|1);NON_SYNONYMOUS_CODING(MODERATE|MISSENSE|Gcc/Tcc|A284S|659|mkg-p|protein_coding|CODING|FBtr…	The gene monkey king protein is referred to in FlyBase by the symbol Dmel\mkg-p (CG7163, FBgn0035889). It is a protein_coding_gene from Drosophila melanogaster. It has 3 annotated transcripts and 3 polypeptides (1 unique). Gene sequence location is 3L:8402168..8405277. It has the cytological map location 66C11. Protein features are: Polymerase, nucleotidyl transferase domain; Zinc finger, C2H2-li…
FBtr0076664	3L_8396707_SNP	A	C	0.06322	11	163	2.5e-06	0.0684175	SiteClass[FBgn0053057|CG33057|UTR_3_PRIME|0;FBgn0035889|mkg-p|NON_SYNONYMOUS_CODING|0],TranscriptAnnot[NON_SYNONYMOUS_CODING(MODERATE|MISSENSE|Gcc/Tcc|A284S|659|mkg-p|protein_coding|CODING|FBtr0076664|3|1);NON_SYNONYMOUS_CODING(MODERATE|MISSENSE|Gcc/Tcc|A284S|659|mkg-p|protein_coding|CODING|FBtr0076665|2|1);NON_SYNONYMOUS_CODING(MODERATE|MISSENSE|Gcc/Tcc|A284S|659|mkg-p|protein_coding|CODING|FBtr…	-
FBtr0076665	3L_8396707_SNP	A	C	0.06322	11	163	2.5e-06	0.0684175	SiteClass[FBgn0053057|CG33057|UTR_3_PRIME|0;FBgn0035889|mkg-p|NON_SYNONYMOUS_CODING|0],TranscriptAnnot[NON_SYNONYMOUS_CODING(MODERATE|MISSENSE|Gcc/Tcc|A284S|659|mkg-p|protein_coding|CODING|FBtr0076664|3|1);NON_SYNONYMOUS_CODING(MODERATE|MISSENSE|Gcc/Tcc|A284S|659|mkg-p|protein_coding|CODING|FBtr0076665|2|1);NON_SYNONYMOUS_CODING(MODERATE|MISSENSE|Gcc/Tcc|A284S|659|mkg-p|protein_coding|CODING|FBtr…	-
FBtr0346628	3L_8396707_SNP	A	C	0.06322	11	163	2.5e-06	0.0684175	SiteClass[FBgn0053057|CG33057|UTR_3_PRIME|0;FBgn0035889|mkg-p|NON_SYNONYMOUS_CODING|0],TranscriptAnnot[NON_SYNONYMOUS_CODING(MODERATE|MISSENSE|Gcc/Tcc|A284S|659|mkg-p|protein_coding|CODING|FBtr0076664|3|1);NON_SYNONYMOUS_CODING(MODERATE|MISSENSE|Gcc/Tcc|A284S|659|mkg-p|protein_coding|CODING|FBtr0076665|2|1);NON_SYNONYMOUS_CODING(MODERATE|MISSENSE|Gcc/Tcc|A284S|659|mkg-p|protein_coding|CODING|FBtr…	-
FBtr0344802	3L_8396707_SNP	A	C	0.06322	11	163	2.5e-06	0.0684175	SiteClass[FBgn0053057|CG33057|UTR_3_PRIME|0;FBgn0035889|mkg-p|NON_SYNONYMOUS_CODING|0],TranscriptAnnot[NON_SYNONYMOUS_CODING(MODERATE|MISSENSE|Gcc/Tcc|A284S|659|mkg-p|protein_coding|CODING|FBtr0076664|3|1);NON_SYNONYMOUS_CODING(MODERATE|MISSENSE|Gcc/Tcc|A284S|659|mkg-p|protein_coding|CODING|FBtr0076665|2|1);NON_SYNONYMOUS_CODING(MODERATE|MISSENSE|Gcc/Tcc|A284S|659|mkg-p|protein_coding|CODING|FBtr…	-
FBtr0076678	3L_8396707_SNP	A	C	0.06322	11	163	2.5e-06	0.0684175	SiteClass[FBgn0053057|CG33057|UTR_3_PRIME|0;FBgn0035889|mkg-p|NON_SYNONYMOUS_CODING|0],TranscriptAnnot[NON_SYNONYMOUS_CODING(MODERATE|MISSENSE|Gcc/Tcc|A284S|659|mkg-p|protein_coding|CODING|FBtr0076664|3|1);NON_SYNONYMOUS_CODING(MODERATE|MISSENSE|Gcc/Tcc|A284S|659|mkg-p|protein_coding|CODING|FBtr0076665|2|1);NON_SYNONYMOUS_CODING(MODERATE|MISSENSE|Gcc/Tcc|A284S|659|mkg-p|protein_coding|CODING|FBtr…	-
FBgn0264748	3L_18061420_SNP	T	C	0.07059	12	158	2.57e-06	0.0684175	SiteClass[FBgn0264748|CG44006|DOWNSTREAM|408],TranscriptAnnot[DOWNSTREAM(MODIFIER||408||374|CG44006|protein_coding|CODING|FBtr0334132||1);INTERGENIC(MODIFIER||||||||||1)]	This gene is referred to in FlyBase by the symbol Dmel\CG44006 (FBgn0264748). It is a protein_coding_gene from Drosophila melanogaster. It has one annotated transcript and one polypeptide. Gene sequence location is 3L:18068728..18070150. It has the cytological map location 75B6. Protein features are: Leucine-rich repeat domain, L domain-like. Its molecular function is unknown. The biological proc…
FBtr0334132	3L_18061420_SNP	T	C	0.07059	12	158	2.57e-06	0.0684175	SiteClass[FBgn0264748|CG44006|DOWNSTREAM|408],TranscriptAnnot[DOWNSTREAM(MODIFIER||408||374|CG44006|protein_coding|CODING|FBtr0334132||1);INTERGENIC(MODIFIER||||||||||1)]	-
FBgn0036583	3L_16241835_SNP	T	C	0.06667	12	168	2.6e-06	0.0684175	SiteClass[FBgn0036583|CG13055|DOWNSTREAM|825],TranscriptAnnot[DOWNSTREAM(MODIFIER||825||309|CG13055|protein_coding|CODING|FBtr0333564||1);INTERGENIC(MODIFIER||||||||||1)]	This gene is referred to in FlyBase by the symbol Dmel\CG13055 (FBgn0036583). It is a protein_coding_gene from Drosophila melanogaster. It has 2 annotated transcripts and 2 polypeptides (1 unique). Gene sequence location is 3L:16249560..16252355. It has the cytological map location 72D10. Protein features are: Domain of unknown function DUF4797. Its molecular function is described by: . It is inv…
FBtr0333564	3L_16241835_SNP	T	C	0.06667	12	168	2.6e-06	0.0684175	SiteClass[FBgn0036583|CG13055|DOWNSTREAM|825],TranscriptAnnot[DOWNSTREAM(MODIFIER||825||309|CG13055|protein_coding|CODING|FBtr0333564||1);INTERGENIC(MODIFIER||||||||||1)]	-
FBgn0034911	2R_19707832_SNP	T	C	0.05682	10	166	2.61e-06	0.0684175	SiteClass[FBgn0034911|CG5549|UPSTREAM|45],TranscriptAnnot[UPSTREAM(MODIFIER||45||1188|CG5549|protein_coding|CODING|FBtr0301162||1);INTERGENIC(MODIFIER||||||||||1)]	This gene is referred to in FlyBase by the symbol Dmel\CG5549 (FBgn0034911). It is a protein_coding_gene from Drosophila melanogaster. It has one annotated transcript and one polypeptide. Gene sequence location is 2R:23820354..23839864. It has the cytological map location 60A2-60A3. Protein features are: Sodium:neurotransmitter symporter. Its molecular function is described by: neurotransmitter:s…
FBtr0301162	2R_19707832_SNP	T	C	0.05682	10	166	2.61e-06	0.0684175	SiteClass[FBgn0034911|CG5549|UPSTREAM|45],TranscriptAnnot[UPSTREAM(MODIFIER||45||1188|CG5549|protein_coding|CODING|FBtr0301162||1);INTERGENIC(MODIFIER||||||||||1)]	-
FBgn0036583	3L_16241933_SNP	T	C	0.06704	12	167	2.71e-06	0.069412	SiteClass[FBgn0036583|CG13055|DOWNSTREAM|727],TranscriptAnnot[DOWNSTREAM(MODIFIER||727||309|CG13055|protein_coding|CODING|FBtr0333564||1);INTERGENIC(MODIFIER||||||||||1)]	This gene is referred to in FlyBase by the symbol Dmel\CG13055 (FBgn0036583). It is a protein_coding_gene from Drosophila melanogaster. It has 2 annotated transcripts and 2 polypeptides (1 unique). Gene sequence location is 3L:16249560..16252355. It has the cytological map location 72D10. Protein features are: Domain of unknown function DUF4797. Its molecular function is described by: . It is inv…
FBtr0333564	3L_16241933_SNP	T	C	0.06704	12	167	2.71e-06	0.069412	SiteClass[FBgn0036583|CG13055|DOWNSTREAM|727],TranscriptAnnot[DOWNSTREAM(MODIFIER||727||309|CG13055|protein_coding|CODING|FBtr0333564||1);INTERGENIC(MODIFIER||||||||||1)]	-
FBgn0262027	3L_19418256_SNP	C	G	0.06215	11	166	2.76e-06	0.069412	SiteClass[FBgn0262027|CR42838|DOWNSTREAM|230;FBgn0052205|CR32205|UPSTREAM|973],TranscriptAnnot[UPSTREAM(MODIFIER||973|||CR32205|ncRNA|NON_CODING|FBtr0075000||1);UPSTREAM(MODIFIER||973|||CR32205|ncRNA|NON_CODING|FBtr0343096||1);UPSTREAM(MODIFIER||973|||CR32205|ncRNA|NON_CODING|FBtr0343097||1);DOWNSTREAM(MODIFIER||230|||CR42838|pseudogene|NON_CODING|FBtr0303863||1);INTERGENIC(MODIFIER||||||||||1)]	This gene is referred to in FlyBase by the symbol Dmel\CR42838 (FBgn0262027). It is a pseudogene_attribute from Drosophila melanogaster. It has one annotated transcript. Gene sequence location is 3L:19424702..19424926. It has the cytological map location 76B3. Its molecular function is unknown. The biological processes in which it is involved are not known. No alleles are reported.
FBgn0052205	3L_19418256_SNP	C	G	0.06215	11	166	2.76e-06	0.069412	SiteClass[FBgn0262027|CR42838|DOWNSTREAM|230;FBgn0052205|CR32205|UPSTREAM|973],TranscriptAnnot[UPSTREAM(MODIFIER||973|||CR32205|ncRNA|NON_CODING|FBtr0075000||1);UPSTREAM(MODIFIER||973|||CR32205|ncRNA|NON_CODING|FBtr0343096||1);UPSTREAM(MODIFIER||973|||CR32205|ncRNA|NON_CODING|FBtr0343097||1);DOWNSTREAM(MODIFIER||230|||CR42838|pseudogene|NON_CODING|FBtr0303863||1);INTERGENIC(MODIFIER||||||||||1)]	This gene is referred to in FlyBase by the symbol Dmel\CR32205 (FBgn0052205). It is a pseudogene_attribute from Drosophila melanogaster. It has 3 annotated transcripts. Gene sequence location is 3L:19422838..19424183. It has the cytological map location 76B3. Its molecular function is unknown. The biological processes in which it is involved are not known. No alleles are reported. Summary of modE…
FBtr0075000	3L_19418256_SNP	C	G	0.06215	11	166	2.76e-06	0.069412	SiteClass[FBgn0262027|CR42838|DOWNSTREAM|230;FBgn0052205|CR32205|UPSTREAM|973],TranscriptAnnot[UPSTREAM(MODIFIER||973|||CR32205|ncRNA|NON_CODING|FBtr0075000||1);UPSTREAM(MODIFIER||973|||CR32205|ncRNA|NON_CODING|FBtr0343096||1);UPSTREAM(MODIFIER||973|||CR32205|ncRNA|NON_CODING|FBtr0343097||1);DOWNSTREAM(MODIFIER||230|||CR42838|pseudogene|NON_CODING|FBtr0303863||1);INTERGENIC(MODIFIER||||||||||1)]	-
FBtr0343096	3L_19418256_SNP	C	G	0.06215	11	166	2.76e-06	0.069412	SiteClass[FBgn0262027|CR42838|DOWNSTREAM|230;FBgn0052205|CR32205|UPSTREAM|973],TranscriptAnnot[UPSTREAM(MODIFIER||973|||CR32205|ncRNA|NON_CODING|FBtr0075000||1);UPSTREAM(MODIFIER||973|||CR32205|ncRNA|NON_CODING|FBtr0343096||1);UPSTREAM(MODIFIER||973|||CR32205|ncRNA|NON_CODING|FBtr0343097||1);DOWNSTREAM(MODIFIER||230|||CR42838|pseudogene|NON_CODING|FBtr0303863||1);INTERGENIC(MODIFIER||||||||||1)]	-
FBtr0343097	3L_19418256_SNP	C	G	0.06215	11	166	2.76e-06	0.069412	SiteClass[FBgn0262027|CR42838|DOWNSTREAM|230;FBgn0052205|CR32205|UPSTREAM|973],TranscriptAnnot[UPSTREAM(MODIFIER||973|||CR32205|ncRNA|NON_CODING|FBtr0075000||1);UPSTREAM(MODIFIER||973|||CR32205|ncRNA|NON_CODING|FBtr0343096||1);UPSTREAM(MODIFIER||973|||CR32205|ncRNA|NON_CODING|FBtr0343097||1);DOWNSTREAM(MODIFIER||230|||CR42838|pseudogene|NON_CODING|FBtr0303863||1);INTERGENIC(MODIFIER||||||||||1)]	-
FBtr0303863	3L_19418256_SNP	C	G	0.06215	11	166	2.76e-06	0.069412	SiteClass[FBgn0262027|CR42838|DOWNSTREAM|230;FBgn0052205|CR32205|UPSTREAM|973],TranscriptAnnot[UPSTREAM(MODIFIER||973|||CR32205|ncRNA|NON_CODING|FBtr0075000||1);UPSTREAM(MODIFIER||973|||CR32205|ncRNA|NON_CODING|FBtr0343096||1);UPSTREAM(MODIFIER||973|||CR32205|ncRNA|NON_CODING|FBtr0343097||1);DOWNSTREAM(MODIFIER||230|||CR42838|pseudogene|NON_CODING|FBtr0303863||1);INTERGENIC(MODIFIER||||||||||1)]	-
FBgn0266671	2R_14512952_SNP	T	C	0.1067	19	159	2.79e-06	0.069412	SiteClass[FBgn0266671|Sec6|SYNONYMOUS_CODING|0;FBgn0034366|Atg7|UPSTREAM|403],TranscriptAnnot[SYNONYMOUS_CODING(LOW|SILENT|cgC/cgT|R35|738|Sec6|protein_coding|CODING|FBtr0086709|1|1);UPSTREAM(MODIFIER||403||510|Atg7|protein_coding|CODING|FBtr0086711||1);UPSTREAM(MODIFIER||403||684|Atg7|protein_coding|CODING|FBtr0086712||1)]	The gene Sec6 ortholog (S. cerevisiae) is referred to in FlyBase by the symbol Dmel\Sec6 (CG5341, FBgn0266671). It is a protein_coding_gene from Drosophila melanogaster. It has one annotated transcript and one polypeptide. Gene sequence location is 2R:18625249..18627718. It has the cytological map location 55E2. Protein features are: Exocyst complex component Sec6. Its molecular function is descr…
FBgn0034366	2R_14512952_SNP	T	C	0.1067	19	159	2.79e-06	0.069412	SiteClass[FBgn0266671|Sec6|SYNONYMOUS_CODING|0;FBgn0034366|Atg7|UPSTREAM|403],TranscriptAnnot[SYNONYMOUS_CODING(LOW|SILENT|cgC/cgT|R35|738|Sec6|protein_coding|CODING|FBtr0086709|1|1);UPSTREAM(MODIFIER||403||510|Atg7|protein_coding|CODING|FBtr0086711||1);UPSTREAM(MODIFIER||403||684|Atg7|protein_coding|CODING|FBtr0086712||1)]	The gene Autophagy-related 7 is referred to in FlyBase by the symbol Dmel\Atg7 (CG5489, FBgn0034366). It is a protein_coding_gene from Drosophila melanogaster. It has 2 annotated transcripts and 2 polypeptides (all unique). Gene sequence location is 2R:18620466..18625044. It has the cytological map location 55E2. Protein features are: NAD(P)-binding domain; THIF-type NAD/FAD binding fold; Ubiquit…
FBtr0086709	2R_14512952_SNP	T	C	0.1067	19	159	2.79e-06	0.069412	SiteClass[FBgn0266671|Sec6|SYNONYMOUS_CODING|0;FBgn0034366|Atg7|UPSTREAM|403],TranscriptAnnot[SYNONYMOUS_CODING(LOW|SILENT|cgC/cgT|R35|738|Sec6|protein_coding|CODING|FBtr0086709|1|1);UPSTREAM(MODIFIER||403||510|Atg7|protein_coding|CODING|FBtr0086711||1);UPSTREAM(MODIFIER||403||684|Atg7|protein_coding|CODING|FBtr0086712||1)]	-
FBtr0086711	2R_14512952_SNP	T	C	0.1067	19	159	2.79e-06	0.069412	SiteClass[FBgn0266671|Sec6|SYNONYMOUS_CODING|0;FBgn0034366|Atg7|UPSTREAM|403],TranscriptAnnot[SYNONYMOUS_CODING(LOW|SILENT|cgC/cgT|R35|738|Sec6|protein_coding|CODING|FBtr0086709|1|1);UPSTREAM(MODIFIER||403||510|Atg7|protein_coding|CODING|FBtr0086711||1);UPSTREAM(MODIFIER||403||684|Atg7|protein_coding|CODING|FBtr0086712||1)]	-
FBtr0086712	2R_14512952_SNP	T	C	0.1067	19	159	2.79e-06	0.069412	SiteClass[FBgn0266671|Sec6|SYNONYMOUS_CODING|0;FBgn0034366|Atg7|UPSTREAM|403],TranscriptAnnot[SYNONYMOUS_CODING(LOW|SILENT|cgC/cgT|R35|738|Sec6|protein_coding|CODING|FBtr0086709|1|1);UPSTREAM(MODIFIER||403||510|Atg7|protein_coding|CODING|FBtr0086711||1);UPSTREAM(MODIFIER||403||684|Atg7|protein_coding|CODING|FBtr0086712||1)]	-
FBgn0085382	3R_23715348_SNP	G	A	0.05233	9	163	2.85e-06	0.0699819	SiteClass[FBgn0085382|CG34353|INTRON|0],TranscriptAnnot[INTRON(MODIFIER||||566|CG34353|protein_coding|CODING|FBtr0112563|1|1);INTRON(MODIFIER||||566|CG34353|protein_coding|CODING|FBtr0305292|1|1);INTRON(MODIFIER||||581|CG34353|protein_coding|CODING|FBtr0339321|1|1)]	This gene is referred to in FlyBase by the symbol Dmel\CG34353 (FBgn0085382). It is a protein_coding_gene from Drosophila melanogaster. It has 3 annotated transcripts and 3 polypeptides (2 unique). Gene sequence location is 3R:27767966..27905843. It has the cytological map location 98B2-98B5. Protein features are: Fibronectin type III; Immunoglobulin; Immunoglobulin I-set; Immunoglobulin subtype;…
FBtr0112563	3R_23715348_SNP	G	A	0.05233	9	163	2.85e-06	0.0699819	SiteClass[FBgn0085382|CG34353|INTRON|0],TranscriptAnnot[INTRON(MODIFIER||||566|CG34353|protein_coding|CODING|FBtr0112563|1|1);INTRON(MODIFIER||||566|CG34353|protein_coding|CODING|FBtr0305292|1|1);INTRON(MODIFIER||||581|CG34353|protein_coding|CODING|FBtr0339321|1|1)]	-
FBtr0305292	3R_23715348_SNP	G	A	0.05233	9	163	2.85e-06	0.0699819	SiteClass[FBgn0085382|CG34353|INTRON|0],TranscriptAnnot[INTRON(MODIFIER||||566|CG34353|protein_coding|CODING|FBtr0112563|1|1);INTRON(MODIFIER||||566|CG34353|protein_coding|CODING|FBtr0305292|1|1);INTRON(MODIFIER||||581|CG34353|protein_coding|CODING|FBtr0339321|1|1)]	-
FBtr0339321	3R_23715348_SNP	G	A	0.05233	9	163	2.85e-06	0.0699819	SiteClass[FBgn0085382|CG34353|INTRON|0],TranscriptAnnot[INTRON(MODIFIER||||566|CG34353|protein_coding|CODING|FBtr0112563|1|1);INTRON(MODIFIER||||566|CG34353|protein_coding|CODING|FBtr0305292|1|1);INTRON(MODIFIER||||581|CG34353|protein_coding|CODING|FBtr0339321|1|1)]	-
FBgn0033702	2R_8111214_SNP	T	G	0.2867	43	107	2.96e-06	0.0703768	SiteClass[FBgn0033702|CG8854|DOWNSTREAM|752],TranscriptAnnot[DOWNSTREAM(MODIFIER||752||392|CG8854|protein_coding|CODING|FBtr0114562||1);DOWNSTREAM(MODIFIER||752||392|CG8854|protein_coding|CODING|FBtr0331944||1);INTERGENIC(MODIFIER||||||||||1)]	This gene is referred to in FlyBase by the symbol Dmel\CG8854 (FBgn0033702). It is a protein_coding_gene from Drosophila melanogaster. It has 2 annotated transcripts and 2 polypeptides (1 unique). Gene sequence location is 2R:12224461..12229310. It has the cytological map location 48E10. Its molecular function is described by: . It is involved in the biological process described with: . One allel…
FBtr0114562	2R_8111214_SNP	T	G	0.2867	43	107	2.96e-06	0.0703768	SiteClass[FBgn0033702|CG8854|DOWNSTREAM|752],TranscriptAnnot[DOWNSTREAM(MODIFIER||752||392|CG8854|protein_coding|CODING|FBtr0114562||1);DOWNSTREAM(MODIFIER||752||392|CG8854|protein_coding|CODING|FBtr0331944||1);INTERGENIC(MODIFIER||||||||||1)]	-
FBtr0331944	2R_8111214_SNP	T	G	0.2867	43	107	2.96e-06	0.0703768	SiteClass[FBgn0033702|CG8854|DOWNSTREAM|752],TranscriptAnnot[DOWNSTREAM(MODIFIER||752||392|CG8854|protein_coding|CODING|FBtr0114562||1);DOWNSTREAM(MODIFIER||752||392|CG8854|protein_coding|CODING|FBtr0331944||1);INTERGENIC(MODIFIER||||||||||1)]	-
FBgn0042650	X_16019701_SNP	G	A	0.05028	9	170	2.97e-06	0.0703768	SiteClass[FBgn0042650|disco-r|INTRON|0],TranscriptAnnot[INTRON(MODIFIER||||1311|disco-r|protein_coding|CODING|FBtr0074251|3|1);INTRON(MODIFIER||||1311|disco-r|protein_coding|CODING|FBtr0310302|2|1);INTRON(MODIFIER||||1311|disco-r|protein_coding|CODING|FBtr0310301|2|1)]	The gene disco-related is referred to in FlyBase by the symbol Dmel\disco-r (CG32577, FBgn0042650). It is a protein_coding_gene from Drosophila melanogaster. It has 4 annotated transcripts and 4 polypeptides (1 unique). Gene sequence location is X:16118067..16148977. It has the cytological map location 14B1. Protein features are: Zinc finger, C2H2; Zinc finger, C2H2-like. Its molecular function i…
FBtr0074251	X_16019701_SNP	G	A	0.05028	9	170	2.97e-06	0.0703768	SiteClass[FBgn0042650|disco-r|INTRON|0],TranscriptAnnot[INTRON(MODIFIER||||1311|disco-r|protein_coding|CODING|FBtr0074251|3|1);INTRON(MODIFIER||||1311|disco-r|protein_coding|CODING|FBtr0310302|2|1);INTRON(MODIFIER||||1311|disco-r|protein_coding|CODING|FBtr0310301|2|1)]	-
FBtr0310302	X_16019701_SNP	G	A	0.05028	9	170	2.97e-06	0.0703768	SiteClass[FBgn0042650|disco-r|INTRON|0],TranscriptAnnot[INTRON(MODIFIER||||1311|disco-r|protein_coding|CODING|FBtr0074251|3|1);INTRON(MODIFIER||||1311|disco-r|protein_coding|CODING|FBtr0310302|2|1);INTRON(MODIFIER||||1311|disco-r|protein_coding|CODING|FBtr0310301|2|1)]	-
FBtr0310301	X_16019701_SNP	G	A	0.05028	9	170	2.97e-06	0.0703768	SiteClass[FBgn0042650|disco-r|INTRON|0],TranscriptAnnot[INTRON(MODIFIER||||1311|disco-r|protein_coding|CODING|FBtr0074251|3|1);INTRON(MODIFIER||||1311|disco-r|protein_coding|CODING|FBtr0310302|2|1);INTRON(MODIFIER||||1311|disco-r|protein_coding|CODING|FBtr0310301|2|1)]	-
FBgn0265934	3L_11318976_SNP	A	G	0.05143	9	166	3.15e-06	0.0728858	SiteClass[FBgn0265934|CR44723|UPSTREAM|876],TranscriptAnnot[UPSTREAM(MODIFIER||876|||CR44723|ncRNA|NON_CODING|FBtr0343036||1);INTERGENIC(MODIFIER||||||||||1)]	This gene is referred to in FlyBase by the symbol Dmel\CR44723 (FBgn0265934). It is a non_protein_coding_gene from Drosophila melanogaster. It has one annotated transcript. Gene sequence location is 3L:11324326..11325000. It has the cytological map location 68C2. Its molecular function is unknown. The biological processes in which it is involved are not known. No alleles are reported.
FBtr0343036	3L_11318976_SNP	A	G	0.05143	9	166	3.15e-06	0.0728858	SiteClass[FBgn0265934|CR44723|UPSTREAM|876],TranscriptAnnot[UPSTREAM(MODIFIER||876|||CR44723|ncRNA|NON_CODING|FBtr0343036||1);INTERGENIC(MODIFIER||||||||||1)]	-
FBgn0260938	X_15771280_SNP	T	C	0.1023	18	158	3.22e-06	0.0728858	SiteClass[FBgn0260938|tay|SYNONYMOUS_CODING|0],TranscriptAnnot[SYNONYMOUS_CODING(LOW|SILENT|gcG/gcA|A2483|2486|tay|protein_coding|CODING|FBtr0310065|14|1);SYNONYMOUS_CODING(LOW|SILENT|gcG/gcA|A2483|2486|tay|protein_coding|CODING|FBtr0074167|14|1);SYNONYMOUS_CODING(LOW|SILENT|gcG/gcA|A2482|2485|tay|protein_coding|CODING|FBtr0340414|14|1);SYNONYMOUS_CODING(LOW|SILENT|gcG/gcA|A2483|2486|tay|protein_…	The gene tay bridge is referred to in FlyBase by the symbol Dmel\tay (CG9056, FBgn0260938). It is a protein_coding_gene from Drosophila melanogaster. It has 4 annotated transcripts and 4 polypeptides (2 unique). Gene sequence location is X:15876368..15887311. It has the cytological map location 14A1-14B1. Its molecular function is unknown. It is involved in the biological process described with: …
FBtr0310065	X_15771280_SNP	T	C	0.1023	18	158	3.22e-06	0.0728858	SiteClass[FBgn0260938|tay|SYNONYMOUS_CODING|0],TranscriptAnnot[SYNONYMOUS_CODING(LOW|SILENT|gcG/gcA|A2483|2486|tay|protein_coding|CODING|FBtr0310065|14|1);SYNONYMOUS_CODING(LOW|SILENT|gcG/gcA|A2483|2486|tay|protein_coding|CODING|FBtr0074167|14|1);SYNONYMOUS_CODING(LOW|SILENT|gcG/gcA|A2482|2485|tay|protein_coding|CODING|FBtr0340414|14|1);SYNONYMOUS_CODING(LOW|SILENT|gcG/gcA|A2483|2486|tay|protein_…	-
FBtr0074167	X_15771280_SNP	T	C	0.1023	18	158	3.22e-06	0.0728858	SiteClass[FBgn0260938|tay|SYNONYMOUS_CODING|0],TranscriptAnnot[SYNONYMOUS_CODING(LOW|SILENT|gcG/gcA|A2483|2486|tay|protein_coding|CODING|FBtr0310065|14|1);SYNONYMOUS_CODING(LOW|SILENT|gcG/gcA|A2483|2486|tay|protein_coding|CODING|FBtr0074167|14|1);SYNONYMOUS_CODING(LOW|SILENT|gcG/gcA|A2482|2485|tay|protein_coding|CODING|FBtr0340414|14|1);SYNONYMOUS_CODING(LOW|SILENT|gcG/gcA|A2483|2486|tay|protein_…	-
FBtr0340414	X_15771280_SNP	T	C	0.1023	18	158	3.22e-06	0.0728858	SiteClass[FBgn0260938|tay|SYNONYMOUS_CODING|0],TranscriptAnnot[SYNONYMOUS_CODING(LOW|SILENT|gcG/gcA|A2483|2486|tay|protein_coding|CODING|FBtr0310065|14|1);SYNONYMOUS_CODING(LOW|SILENT|gcG/gcA|A2483|2486|tay|protein_coding|CODING|FBtr0074167|14|1);SYNONYMOUS_CODING(LOW|SILENT|gcG/gcA|A2482|2485|tay|protein_coding|CODING|FBtr0340414|14|1);SYNONYMOUS_CODING(LOW|SILENT|gcG/gcA|A2483|2486|tay|protein_…	-
FBtr0310066	X_15771280_SNP	T	C	0.1023	18	158	3.22e-06	0.0728858	SiteClass[FBgn0260938|tay|SYNONYMOUS_CODING|0],TranscriptAnnot[SYNONYMOUS_CODING(LOW|SILENT|gcG/gcA|A2483|2486|tay|protein_coding|CODING|FBtr0310065|14|1);SYNONYMOUS_CODING(LOW|SILENT|gcG/gcA|A2483|2486|tay|protein_coding|CODING|FBtr0074167|14|1);SYNONYMOUS_CODING(LOW|SILENT|gcG/gcA|A2482|2485|tay|protein_coding|CODING|FBtr0340414|14|1);SYNONYMOUS_CODING(LOW|SILENT|gcG/gcA|A2483|2486|tay|protein_…	-
FBgn0263864	2R_12909756_SNP	T	C	0.08	14	161	3.31e-06	0.0728858	SiteClass[FBgn0263864|Ark|SYNONYMOUS_CODING|0],TranscriptAnnot[SYNONYMOUS_CODING(LOW|SILENT|Ctg/Ttg|L244|1440|Ark|protein_coding|CODING|FBtr0086968|3|1);SYNONYMOUS_CODING(LOW|SILENT|Ctg/Ttg|L244|531|Ark|protein_coding|CODING|FBtr0086967|3|1)]	The gene Death-associated APAF1-related killer is referred to in FlyBase by the symbol Dmel\Dark (CG6829, FBgn0263864). It is a protein_coding_gene from Drosophila melanogaster. It has 2 annotated transcripts and 2 polypeptides (all unique). Gene sequence location is 2R:17020027..17026703. It has the cytological map location 53E4-54A2. Protein features are: NB-ARC; P-loop containing nucleoside tr…
FBtr0086968	2R_12909756_SNP	T	C	0.08	14	161	3.31e-06	0.0728858	SiteClass[FBgn0263864|Ark|SYNONYMOUS_CODING|0],TranscriptAnnot[SYNONYMOUS_CODING(LOW|SILENT|Ctg/Ttg|L244|1440|Ark|protein_coding|CODING|FBtr0086968|3|1);SYNONYMOUS_CODING(LOW|SILENT|Ctg/Ttg|L244|531|Ark|protein_coding|CODING|FBtr0086967|3|1)]	-
FBtr0086967	2R_12909756_SNP	T	C	0.08	14	161	3.31e-06	0.0728858	SiteClass[FBgn0263864|Ark|SYNONYMOUS_CODING|0],TranscriptAnnot[SYNONYMOUS_CODING(LOW|SILENT|Ctg/Ttg|L244|1440|Ark|protein_coding|CODING|FBtr0086968|3|1);SYNONYMOUS_CODING(LOW|SILENT|Ctg/Ttg|L244|531|Ark|protein_coding|CODING|FBtr0086967|3|1)]	-
FBgn0033702	2R_8115914_SNP	T	A	0.2632	45	126	3.41e-06	0.0728858	SiteClass[FBgn0033702|CG8854|INTRON|0],TranscriptAnnot[INTRON(MODIFIER||||392|CG8854|protein_coding|CODING|FBtr0331944|1|1)]	This gene is referred to in FlyBase by the symbol Dmel\CG8854 (FBgn0033702). It is a protein_coding_gene from Drosophila melanogaster. It has 2 annotated transcripts and 2 polypeptides (1 unique). Gene sequence location is 2R:12224461..12229310. It has the cytological map location 48E10. Its molecular function is described by: . It is involved in the biological process described with: . One allel…
FBtr0331944	2R_8115914_SNP	T	A	0.2632	45	126	3.41e-06	0.0728858	SiteClass[FBgn0033702|CG8854|INTRON|0],TranscriptAnnot[INTRON(MODIFIER||||392|CG8854|protein_coding|CODING|FBtr0331944|1|1)]	-
FBgn0034253	2R_13499763_SNP	A	C	0.0565	10	167	3.42e-06	0.0728858	SiteClass[FBgn0034253|CG10936|INTRON|0],TranscriptAnnot[INTRON(MODIFIER||||1524|CG10936|protein_coding|CODING|FBtr0086895|3|1)]	This gene is referred to in FlyBase by the symbol Dmel\CG10936 (FBgn0034253). It is a protein_coding_gene from Drosophila melanogaster. It has one annotated transcript and one polypeptide. Gene sequence location is 2R:17604951..17639138. It has the cytological map location 54D1-54D2. Protein features are: SEA domain. Its molecular function is unknown. It is involved in the biological process desc…
FBtr0086895	2R_13499763_SNP	A	C	0.0565	10	167	3.42e-06	0.0728858	SiteClass[FBgn0034253|CG10936|INTRON|0],TranscriptAnnot[INTRON(MODIFIER||||1524|CG10936|protein_coding|CODING|FBtr0086895|3|1)]	-
FBgn0266396	3L_11357824_SNP	T	C	0.0678	12	165	3.44e-06	0.0728858	SiteClass[FBgn0266396|CR45036|EXON|0;FBgn0036155|CG6163|SYNONYMOUS_CODING|0],TranscriptAnnot[SYNONYMOUS_CODING(LOW|SILENT|gcG/gcA|A16|428|CG6163|protein_coding|CODING|FBtr0333387|1|1);SYNONYMOUS_CODING(LOW|SILENT|gcG/gcA|A16|428|CG6163|protein_coding|CODING|FBtr0076181|1|1);EXON(MODIFIER|||||CR45036|ncRNA|NON_CODING|FBtr0344308|1|1)]	This gene is referred to in FlyBase by the symbol Dmel\CR45036 (FBgn0266396). It is a non_protein_coding_gene from Drosophila melanogaster. It has one annotated transcript. Gene sequence location is 3L:11364683..11365897. It has the cytological map location 68C4. Its molecular function is unknown. The biological processes in which it is involved are not known. No alleles are reported.
FBgn0036155	3L_11357824_SNP	T	C	0.0678	12	165	3.44e-06	0.0728858	SiteClass[FBgn0266396|CR45036|EXON|0;FBgn0036155|CG6163|SYNONYMOUS_CODING|0],TranscriptAnnot[SYNONYMOUS_CODING(LOW|SILENT|gcG/gcA|A16|428|CG6163|protein_coding|CODING|FBtr0333387|1|1);SYNONYMOUS_CODING(LOW|SILENT|gcG/gcA|A16|428|CG6163|protein_coding|CODING|FBtr0076181|1|1);EXON(MODIFIER|||||CR45036|ncRNA|NON_CODING|FBtr0344308|1|1)]	This gene is referred to in FlyBase by the symbol Dmel\CG6163 (FBgn0036155). It is a protein_coding_gene from Drosophila melanogaster. It has 2 annotated transcripts and 2 polypeptides (1 unique). Gene sequence location is 3L:11361986..11364885. It has the cytological map location 68C4. Protein features are: MADF domain. Its molecular function is unknown. The biological processes in which it is i…
FBtr0333387	3L_11357824_SNP	T	C	0.0678	12	165	3.44e-06	0.0728858	SiteClass[FBgn0266396|CR45036|EXON|0;FBgn0036155|CG6163|SYNONYMOUS_CODING|0],TranscriptAnnot[SYNONYMOUS_CODING(LOW|SILENT|gcG/gcA|A16|428|CG6163|protein_coding|CODING|FBtr0333387|1|1);SYNONYMOUS_CODING(LOW|SILENT|gcG/gcA|A16|428|CG6163|protein_coding|CODING|FBtr0076181|1|1);EXON(MODIFIER|||||CR45036|ncRNA|NON_CODING|FBtr0344308|1|1)]	-
FBtr0076181	3L_11357824_SNP	T	C	0.0678	12	165	3.44e-06	0.0728858	SiteClass[FBgn0266396|CR45036|EXON|0;FBgn0036155|CG6163|SYNONYMOUS_CODING|0],TranscriptAnnot[SYNONYMOUS_CODING(LOW|SILENT|gcG/gcA|A16|428|CG6163|protein_coding|CODING|FBtr0333387|1|1);SYNONYMOUS_CODING(LOW|SILENT|gcG/gcA|A16|428|CG6163|protein_coding|CODING|FBtr0076181|1|1);EXON(MODIFIER|||||CR45036|ncRNA|NON_CODING|FBtr0344308|1|1)]	-
FBtr0344308	3L_11357824_SNP	T	C	0.0678	12	165	3.44e-06	0.0728858	SiteClass[FBgn0266396|CR45036|EXON|0;FBgn0036155|CG6163|SYNONYMOUS_CODING|0],TranscriptAnnot[SYNONYMOUS_CODING(LOW|SILENT|gcG/gcA|A16|428|CG6163|protein_coding|CODING|FBtr0333387|1|1);SYNONYMOUS_CODING(LOW|SILENT|gcG/gcA|A16|428|CG6163|protein_coding|CODING|FBtr0076181|1|1);EXON(MODIFIER|||||CR45036|ncRNA|NON_CODING|FBtr0344308|1|1)]	-
FBgn0040823	3L_10112971_SNP	T	C	0.08046	14	160	3.49e-06	0.0728858	SiteClass[FBgn0040823|dpr6|INTRON|0],TranscriptAnnot[INTRON(MODIFIER||||283|dpr6|protein_coding|CODING|FBtr0332666|6|1)]	The gene defective proboscis extension response 6 is referred to in FlyBase by the symbol Dmel\dpr6 (CG14162, FBgn0040823). It is a protein_coding_gene from Drosophila melanogaster. It has 5 annotated transcripts and 5 polypeptides (all unique). Gene sequence location is 3L:9974651..10139360. It has the cytological map location 67D2-67D8. Protein features are: Immunoglobulin I-set; Immunoglobulin…
FBtr0332666	3L_10112971_SNP	T	C	0.08046	14	160	3.49e-06	0.0728858	SiteClass[FBgn0040823|dpr6|INTRON|0],TranscriptAnnot[INTRON(MODIFIER||||283|dpr6|protein_coding|CODING|FBtr0332666|6|1)]	-
FBgn0003339	3R_2668803_SNP	A	G	0.05233	9	163	3.54e-06	0.0728858	SiteClass[FBgn0003339|Scr|INTRON|0],TranscriptAnnot[INTRON(MODIFIER||||417|Scr|protein_coding|CODING|FBtr0081657|1|1);INTRON(MODIFIER||||417|Scr|protein_coding|CODING|FBtr0081658|1|1)]	The gene Sex combs reduced is referred to in FlyBase by the symbol Dmel\Scr (CG1030, FBgn0003339). It is a protein_coding_gene from Drosophila melanogaster. It has 2 annotated transcripts and 2 polypeptides (1 unique). Gene sequence location is 3R:6823120..6849981. It has the cytological map location 84A5. Protein features are: Homeobox domain; Homeobox protein, antennapedia type; Homeobox protei…
FBtr0081657	3R_2668803_SNP	A	G	0.05233	9	163	3.54e-06	0.0728858	SiteClass[FBgn0003339|Scr|INTRON|0],TranscriptAnnot[INTRON(MODIFIER||||417|Scr|protein_coding|CODING|FBtr0081657|1|1);INTRON(MODIFIER||||417|Scr|protein_coding|CODING|FBtr0081658|1|1)]	-
FBtr0081658	3R_2668803_SNP	A	G	0.05233	9	163	3.54e-06	0.0728858	SiteClass[FBgn0003339|Scr|INTRON|0],TranscriptAnnot[INTRON(MODIFIER||||417|Scr|protein_coding|CODING|FBtr0081657|1|1);INTRON(MODIFIER||||417|Scr|protein_coding|CODING|FBtr0081658|1|1)]	-
FBgn0033702	2R_8115912_SNP	T	A	0.2663	45	124	3.55e-06	0.0728858	SiteClass[FBgn0033702|CG8854|INTRON|0],TranscriptAnnot[INTRON(MODIFIER||||392|CG8854|protein_coding|CODING|FBtr0331944|1|1)]	This gene is referred to in FlyBase by the symbol Dmel\CG8854 (FBgn0033702). It is a protein_coding_gene from Drosophila melanogaster. It has 2 annotated transcripts and 2 polypeptides (1 unique). Gene sequence location is 2R:12224461..12229310. It has the cytological map location 48E10. Its molecular function is described by: . It is involved in the biological process described with: . One allel…
FBtr0331944	2R_8115912_SNP	T	A	0.2663	45	124	3.55e-06	0.0728858	SiteClass[FBgn0033702|CG8854|INTRON|0],TranscriptAnnot[INTRON(MODIFIER||||392|CG8854|protein_coding|CODING|FBtr0331944|1|1)]	-
FBgn0036777	3L_18112024_SNP	G	C	0.1059	18	152	3.55e-06	0.0728858	SiteClass[FBgn0036777|CG7341|INTRON|0;FBgn0052195|CG32195|UTR_3_PRIME|0],TranscriptAnnot[UTR_3_PRIME(MODIFIER||3164||401|CG32195|protein_coding|CODING|FBtr0075125|4|1);INTRON(MODIFIER||||357|CG7341|protein_coding|CODING|FBtr0075124|1|1);INTRON(MODIFIER||||357|CG7341|protein_coding|CODING|FBtr0075123|1|1)]	This gene is referred to in FlyBase by the symbol Dmel\CG7341 (FBgn0036777). It is a protein_coding_gene from Drosophila melanogaster. It has 2 annotated transcripts and 2 polypeptides (1 unique). Gene sequence location is 3L:18112959..18121003. It has the cytological map location 75B10. Its molecular function is unknown. The biological processes in which it is involved are not known. 7 alleles a…
FBgn0052195	3L_18112024_SNP	G	C	0.1059	18	152	3.55e-06	0.0728858	SiteClass[FBgn0036777|CG7341|INTRON|0;FBgn0052195|CG32195|UTR_3_PRIME|0],TranscriptAnnot[UTR_3_PRIME(MODIFIER||3164||401|CG32195|protein_coding|CODING|FBtr0075125|4|1);INTRON(MODIFIER||||357|CG7341|protein_coding|CODING|FBtr0075124|1|1);INTRON(MODIFIER||||357|CG7341|protein_coding|CODING|FBtr0075123|1|1)]	This gene is referred to in FlyBase by the symbol Dmel\CG32195 (FBgn0052195). It is a protein_coding_gene from Drosophila melanogaster. It has 3 annotated transcripts and 3 polypeptides (1 unique). Gene sequence location is 3L:18112959..18119150. It has the cytological map location 75B10. Protein features are: CHK kinase-like; Protein kinase-like domain; Protein of unknown function DUF227. Its mo…
FBtr0075125	3L_18112024_SNP	G	C	0.1059	18	152	3.55e-06	0.0728858	SiteClass[FBgn0036777|CG7341|INTRON|0;FBgn0052195|CG32195|UTR_3_PRIME|0],TranscriptAnnot[UTR_3_PRIME(MODIFIER||3164||401|CG32195|protein_coding|CODING|FBtr0075125|4|1);INTRON(MODIFIER||||357|CG7341|protein_coding|CODING|FBtr0075124|1|1);INTRON(MODIFIER||||357|CG7341|protein_coding|CODING|FBtr0075123|1|1)]	-
FBtr0075124	3L_18112024_SNP	G	C	0.1059	18	152	3.55e-06	0.0728858	SiteClass[FBgn0036777|CG7341|INTRON|0;FBgn0052195|CG32195|UTR_3_PRIME|0],TranscriptAnnot[UTR_3_PRIME(MODIFIER||3164||401|CG32195|protein_coding|CODING|FBtr0075125|4|1);INTRON(MODIFIER||||357|CG7341|protein_coding|CODING|FBtr0075124|1|1);INTRON(MODIFIER||||357|CG7341|protein_coding|CODING|FBtr0075123|1|1)]	-
FBtr0075123	3L_18112024_SNP	G	C	0.1059	18	152	3.55e-06	0.0728858	SiteClass[FBgn0036777|CG7341|INTRON|0;FBgn0052195|CG32195|UTR_3_PRIME|0],TranscriptAnnot[UTR_3_PRIME(MODIFIER||3164||401|CG32195|protein_coding|CODING|FBtr0075125|4|1);INTRON(MODIFIER||||357|CG7341|protein_coding|CODING|FBtr0075124|1|1);INTRON(MODIFIER||||357|CG7341|protein_coding|CODING|FBtr0075123|1|1)]	-
FBgn0264941	X_14411994_SNP	G	T	0.3391	59	115	3.57e-06	0.0728858	SiteClass[FBgn0264941|CR44110|INTRON|0],TranscriptAnnot[INTRON(MODIFIER|||||CR44110|ncRNA|NON_CODING|FBtr0335121|1|1)]	This gene is referred to in FlyBase by the symbol Dmel\CR44110 (FBgn0264941). It is a non_protein_coding_gene from Drosophila melanogaster. It has one annotated transcript. Gene sequence location is X:14517290..14519516. It has the cytological map location 12F1. Its molecular function is unknown. The biological processes in which it is involved are not known. No alleles are reported.
FBtr0335121	X_14411994_SNP	G	T	0.3391	59	115	3.57e-06	0.0728858	SiteClass[FBgn0264941|CR44110|INTRON|0],TranscriptAnnot[INTRON(MODIFIER|||||CR44110|ncRNA|NON_CODING|FBtr0335121|1|1)]	-
FBgn0262027	3L_19418153_SNP	T	C	0.06977	12	160	3.75e-06	0.0755804	SiteClass[FBgn0262027|CR42838|DOWNSTREAM|127;FBgn0052205|CR32205|UPSTREAM|870;FBgn0053255|CG33255|DOWNSTREAM|907],TranscriptAnnot[UPSTREAM(MODIFIER||870|||CR32205|ncRNA|NON_CODING|FBtr0075000||1);UPSTREAM(MODIFIER||870|||CR32205|ncRNA|NON_CODING|FBtr0343096||1);UPSTREAM(MODIFIER||870|||CR32205|ncRNA|NON_CODING|FBtr0343097||1);DOWNSTREAM(MODIFIER||907||109|CG33255|protein_coding|CODING|FBtr0303862…	This gene is referred to in FlyBase by the symbol Dmel\CR42838 (FBgn0262027). It is a pseudogene_attribute from Drosophila melanogaster. It has one annotated transcript. Gene sequence location is 3L:19424702..19424926. It has the cytological map location 76B3. Its molecular function is unknown. The biological processes in which it is involved are not known. No alleles are reported.
FBgn0052205	3L_19418153_SNP	T	C	0.06977	12	160	3.75e-06	0.0755804	SiteClass[FBgn0262027|CR42838|DOWNSTREAM|127;FBgn0052205|CR32205|UPSTREAM|870;FBgn0053255|CG33255|DOWNSTREAM|907],TranscriptAnnot[UPSTREAM(MODIFIER||870|||CR32205|ncRNA|NON_CODING|FBtr0075000||1);UPSTREAM(MODIFIER||870|||CR32205|ncRNA|NON_CODING|FBtr0343096||1);UPSTREAM(MODIFIER||870|||CR32205|ncRNA|NON_CODING|FBtr0343097||1);DOWNSTREAM(MODIFIER||907||109|CG33255|protein_coding|CODING|FBtr0303862…	This gene is referred to in FlyBase by the symbol Dmel\CR32205 (FBgn0052205). It is a pseudogene_attribute from Drosophila melanogaster. It has 3 annotated transcripts. Gene sequence location is 3L:19422838..19424183. It has the cytological map location 76B3. Its molecular function is unknown. The biological processes in which it is involved are not known. No alleles are reported. Summary of modE…
FBgn0053255	3L_19418153_SNP	T	C	0.06977	12	160	3.75e-06	0.0755804	SiteClass[FBgn0262027|CR42838|DOWNSTREAM|127;FBgn0052205|CR32205|UPSTREAM|870;FBgn0053255|CG33255|DOWNSTREAM|907],TranscriptAnnot[UPSTREAM(MODIFIER||870|||CR32205|ncRNA|NON_CODING|FBtr0075000||1);UPSTREAM(MODIFIER||870|||CR32205|ncRNA|NON_CODING|FBtr0343096||1);UPSTREAM(MODIFIER||870|||CR32205|ncRNA|NON_CODING|FBtr0343097||1);DOWNSTREAM(MODIFIER||907||109|CG33255|protein_coding|CODING|FBtr0303862…	This gene is referred to in FlyBase by the symbol Dmel\CR33255 (FBgn0053255). It is a pseudogene_attribute from Drosophila melanogaster. It has one annotated transcript. Gene sequence location is 3L:19423758..19424146. It has the cytological map location 76B3. Its molecular function is described by: . It is involved in the biological process described with: . 3 alleles are reported. No phenotypic…
FBtr0075000	3L_19418153_SNP	T	C	0.06977	12	160	3.75e-06	0.0755804	SiteClass[FBgn0262027|CR42838|DOWNSTREAM|127;FBgn0052205|CR32205|UPSTREAM|870;FBgn0053255|CG33255|DOWNSTREAM|907],TranscriptAnnot[UPSTREAM(MODIFIER||870|||CR32205|ncRNA|NON_CODING|FBtr0075000||1);UPSTREAM(MODIFIER||870|||CR32205|ncRNA|NON_CODING|FBtr0343096||1);UPSTREAM(MODIFIER||870|||CR32205|ncRNA|NON_CODING|FBtr0343097||1);DOWNSTREAM(MODIFIER||907||109|CG33255|protein_coding|CODING|FBtr0303862…	-
FBtr0343096	3L_19418153_SNP	T	C	0.06977	12	160	3.75e-06	0.0755804	SiteClass[FBgn0262027|CR42838|DOWNSTREAM|127;FBgn0052205|CR32205|UPSTREAM|870;FBgn0053255|CG33255|DOWNSTREAM|907],TranscriptAnnot[UPSTREAM(MODIFIER||870|||CR32205|ncRNA|NON_CODING|FBtr0075000||1);UPSTREAM(MODIFIER||870|||CR32205|ncRNA|NON_CODING|FBtr0343096||1);UPSTREAM(MODIFIER||870|||CR32205|ncRNA|NON_CODING|FBtr0343097||1);DOWNSTREAM(MODIFIER||907||109|CG33255|protein_coding|CODING|FBtr0303862…	-
FBtr0343097	3L_19418153_SNP	T	C	0.06977	12	160	3.75e-06	0.0755804	SiteClass[FBgn0262027|CR42838|DOWNSTREAM|127;FBgn0052205|CR32205|UPSTREAM|870;FBgn0053255|CG33255|DOWNSTREAM|907],TranscriptAnnot[UPSTREAM(MODIFIER||870|||CR32205|ncRNA|NON_CODING|FBtr0075000||1);UPSTREAM(MODIFIER||870|||CR32205|ncRNA|NON_CODING|FBtr0343096||1);UPSTREAM(MODIFIER||870|||CR32205|ncRNA|NON_CODING|FBtr0343097||1);DOWNSTREAM(MODIFIER||907||109|CG33255|protein_coding|CODING|FBtr0303862…	-
FBtr0303862	3L_19418153_SNP	T	C	0.06977	12	160	3.75e-06	0.0755804	SiteClass[FBgn0262027|CR42838|DOWNSTREAM|127;FBgn0052205|CR32205|UPSTREAM|870;FBgn0053255|CG33255|DOWNSTREAM|907],TranscriptAnnot[UPSTREAM(MODIFIER||870|||CR32205|ncRNA|NON_CODING|FBtr0075000||1);UPSTREAM(MODIFIER||870|||CR32205|ncRNA|NON_CODING|FBtr0343096||1);UPSTREAM(MODIFIER||870|||CR32205|ncRNA|NON_CODING|FBtr0343097||1);DOWNSTREAM(MODIFIER||907||109|CG33255|protein_coding|CODING|FBtr0303862…	-
FBtr0303863	3L_19418153_SNP	T	C	0.06977	12	160	3.75e-06	0.0755804	SiteClass[FBgn0262027|CR42838|DOWNSTREAM|127;FBgn0052205|CR32205|UPSTREAM|870;FBgn0053255|CG33255|DOWNSTREAM|907],TranscriptAnnot[UPSTREAM(MODIFIER||870|||CR32205|ncRNA|NON_CODING|FBtr0075000||1);UPSTREAM(MODIFIER||870|||CR32205|ncRNA|NON_CODING|FBtr0343096||1);UPSTREAM(MODIFIER||870|||CR32205|ncRNA|NON_CODING|FBtr0343097||1);DOWNSTREAM(MODIFIER||907||109|CG33255|protein_coding|CODING|FBtr0303862…	-
FBgn0052195	3L_18112023_SNP	A	G	0.1065	18	151	3.83e-06	0.0761856	SiteClass[FBgn0052195|CG32195|UTR_3_PRIME|0;FBgn0036777|CG7341|INTRON|0],TranscriptAnnot[UTR_3_PRIME(MODIFIER||3163||401|CG32195|protein_coding|CODING|FBtr0075125|4|1);INTRON(MODIFIER||||357|CG7341|protein_coding|CODING|FBtr0075124|1|1);INTRON(MODIFIER||||357|CG7341|protein_coding|CODING|FBtr0075123|1|1)]	This gene is referred to in FlyBase by the symbol Dmel\CG32195 (FBgn0052195). It is a protein_coding_gene from Drosophila melanogaster. It has 3 annotated transcripts and 3 polypeptides (1 unique). Gene sequence location is 3L:18112959..18119150. It has the cytological map location 75B10. Protein features are: CHK kinase-like; Protein kinase-like domain; Protein of unknown function DUF227. Its mo…
FBgn0036777	3L_18112023_SNP	A	G	0.1065	18	151	3.83e-06	0.0761856	SiteClass[FBgn0052195|CG32195|UTR_3_PRIME|0;FBgn0036777|CG7341|INTRON|0],TranscriptAnnot[UTR_3_PRIME(MODIFIER||3163||401|CG32195|protein_coding|CODING|FBtr0075125|4|1);INTRON(MODIFIER||||357|CG7341|protein_coding|CODING|FBtr0075124|1|1);INTRON(MODIFIER||||357|CG7341|protein_coding|CODING|FBtr0075123|1|1)]	This gene is referred to in FlyBase by the symbol Dmel\CG7341 (FBgn0036777). It is a protein_coding_gene from Drosophila melanogaster. It has 2 annotated transcripts and 2 polypeptides (1 unique). Gene sequence location is 3L:18112959..18121003. It has the cytological map location 75B10. Its molecular function is unknown. The biological processes in which it is involved are not known. 7 alleles a…
FBtr0075125	3L_18112023_SNP	A	G	0.1065	18	151	3.83e-06	0.0761856	SiteClass[FBgn0052195|CG32195|UTR_3_PRIME|0;FBgn0036777|CG7341|INTRON|0],TranscriptAnnot[UTR_3_PRIME(MODIFIER||3163||401|CG32195|protein_coding|CODING|FBtr0075125|4|1);INTRON(MODIFIER||||357|CG7341|protein_coding|CODING|FBtr0075124|1|1);INTRON(MODIFIER||||357|CG7341|protein_coding|CODING|FBtr0075123|1|1)]	-
FBtr0075124	3L_18112023_SNP	A	G	0.1065	18	151	3.83e-06	0.0761856	SiteClass[FBgn0052195|CG32195|UTR_3_PRIME|0;FBgn0036777|CG7341|INTRON|0],TranscriptAnnot[UTR_3_PRIME(MODIFIER||3163||401|CG32195|protein_coding|CODING|FBtr0075125|4|1);INTRON(MODIFIER||||357|CG7341|protein_coding|CODING|FBtr0075124|1|1);INTRON(MODIFIER||||357|CG7341|protein_coding|CODING|FBtr0075123|1|1)]	-
FBtr0075123	3L_18112023_SNP	A	G	0.1065	18	151	3.83e-06	0.0761856	SiteClass[FBgn0052195|CG32195|UTR_3_PRIME|0;FBgn0036777|CG7341|INTRON|0],TranscriptAnnot[UTR_3_PRIME(MODIFIER||3163||401|CG32195|protein_coding|CODING|FBtr0075125|4|1);INTRON(MODIFIER||||357|CG7341|protein_coding|CODING|FBtr0075124|1|1);INTRON(MODIFIER||||357|CG7341|protein_coding|CODING|FBtr0075123|1|1)]	-
FBgn0039178	3R_20113116_SNP	G	T	0.1905	32	136	3.86e-06	0.0761856	SiteClass[FBgn0039178|CG6356|INTRON|0],TranscriptAnnot[INTRON(MODIFIER||||570|CG6356|protein_coding|CODING|FBtr0084601|5|1)]	This gene is referred to in FlyBase by the symbol Dmel\CG6356 (FBgn0039178). It is a protein_coding_gene from Drosophila melanogaster. It has one annotated transcript and one polypeptide. Gene sequence location is 3R:24283955..24288617. It has the cytological map location 95F9. Protein features are: Major facilitator superfamily domain; Major facilitator, sugar transporter-like. Its molecular fun…
FBtr0084601	3R_20113116_SNP	G	T	0.1905	32	136	3.86e-06	0.0761856	SiteClass[FBgn0039178|CG6356|INTRON|0],TranscriptAnnot[INTRON(MODIFIER||||570|CG6356|protein_coding|CODING|FBtr0084601|5|1)]	-
FBgn0051556	3R_2135172_SNP	G	C	0.05521	9	154	3.9e-06	0.0762799	SiteClass[FBgn0051556|CG31556|UPSTREAM|154;FBgn0051560|CG31560|UPSTREAM|546],TranscriptAnnot[UPSTREAM(MODIFIER||546||279|CG31560|protein_coding|CODING|FBtr0078609||1);UPSTREAM(MODIFIER||154||590|CG31556|protein_coding|CODING|FBtr0078612||1);INTERGENIC(MODIFIER||||||||||1)]	This gene is referred to in FlyBase by the symbol Dmel\CG31556 (FBgn0051556).The gene previously had a gene model which is not supported by current evidence. It is a protein_coding_gene from Drosophila melanogaster.. Gene has not been localized to the genome sequence. It has the cytological map location 83E2. Its molecular function is described by: . It is involved in the biological process descr…
FBgn0051560	3R_2135172_SNP	G	C	0.05521	9	154	3.9e-06	0.0762799	SiteClass[FBgn0051556|CG31556|UPSTREAM|154;FBgn0051560|CG31560|UPSTREAM|546],TranscriptAnnot[UPSTREAM(MODIFIER||546||279|CG31560|protein_coding|CODING|FBtr0078609||1);UPSTREAM(MODIFIER||154||590|CG31556|protein_coding|CODING|FBtr0078612||1);INTERGENIC(MODIFIER||||||||||1)]	This gene is referred to in FlyBase by the symbol Dmel\CG31560 (FBgn0051560). It is a protein_coding_gene from Drosophila melanogaster. It has one annotated transcript and one polypeptide. Gene sequence location is 3R:6309976..6310998. It has the cytological map location 83E2. Its molecular function is unknown. The biological processes in which it is involved are not known. 3 alleles are reported…
FBtr0078609	3R_2135172_SNP	G	C	0.05521	9	154	3.9e-06	0.0762799	SiteClass[FBgn0051556|CG31556|UPSTREAM|154;FBgn0051560|CG31560|UPSTREAM|546],TranscriptAnnot[UPSTREAM(MODIFIER||546||279|CG31560|protein_coding|CODING|FBtr0078609||1);UPSTREAM(MODIFIER||154||590|CG31556|protein_coding|CODING|FBtr0078612||1);INTERGENIC(MODIFIER||||||||||1)]	-
FBtr0078612	3R_2135172_SNP	G	C	0.05521	9	154	3.9e-06	0.0762799	SiteClass[FBgn0051556|CG31556|UPSTREAM|154;FBgn0051560|CG31560|UPSTREAM|546],TranscriptAnnot[UPSTREAM(MODIFIER||546||279|CG31560|protein_coding|CODING|FBtr0078609||1);UPSTREAM(MODIFIER||154||590|CG31556|protein_coding|CODING|FBtr0078612||1);INTERGENIC(MODIFIER||||||||||1)]	-
FBgn0051485	3R_2645274_SNP	G	T	0.1273	21	144	3.97e-06	0.076786	SiteClass[FBgn0051485|tRNA:CR31485:Psi|UPSTREAM|214;FBgn0026162|tRNA:K5:84ABd|UPSTREAM|342;FBgn0261504|7SLRNA:CR42652|DOWNSTREAM|581],TranscriptAnnot[UPSTREAM(MODIFIER||342|||tRNA:K5:84ABd|tRNA|NON_CODING|FBtr0081622||1);UPSTREAM(MODIFIER||214|||tRNA:CR31485:Psi|pseudogene|NON_CODING|FBtr0081662||1);DOWNSTREAM(MODIFIER||581|||7SLRNA:CR42652|ncRNA|NON_CODING|FBtr0302398||1);INTERGENIC(MODIFIER||||…	The gene transfer RNA:CR31485:pseudogene is referred to in FlyBase by the symbol Dmel\tRNA:CR31485:Œ® (CR31485, FBgn0051485). It is a pseudogene_attribute from Drosophila melanogaster. It has one annotated transcript. Gene sequence location is 3R:6819266..6819338. It has the cytological map location 84A5. Its molecular function is unknown. The biological processes in which it is involved are not …
FBgn0026162	3R_2645274_SNP	G	T	0.1273	21	144	3.97e-06	0.076786	SiteClass[FBgn0051485|tRNA:CR31485:Psi|UPSTREAM|214;FBgn0026162|tRNA:K5:84ABd|UPSTREAM|342;FBgn0261504|7SLRNA:CR42652|DOWNSTREAM|581],TranscriptAnnot[UPSTREAM(MODIFIER||342|||tRNA:K5:84ABd|tRNA|NON_CODING|FBtr0081622||1);UPSTREAM(MODIFIER||214|||tRNA:CR31485:Psi|pseudogene|NON_CODING|FBtr0081662||1);DOWNSTREAM(MODIFIER||581|||7SLRNA:CR42652|ncRNA|NON_CODING|FBtr0302398||1);INTERGENIC(MODIFIER||||…	The gene tRNA:K5:84ABd is referred to in FlyBase by the symbol Dmel\tRNA:K5:84ABd (CR31490, FBgn0026162). It is a tRNA_gene from Drosophila melanogaster. It has one annotated transcript. Gene sequence location is 3R:6819894..6819966. It has the cytological map location 84A5. Its molecular function is described by: AAA codon-amino acid adaptor activity. It is involved in the biological process des…
FBgn0261504	3R_2645274_SNP	G	T	0.1273	21	144	3.97e-06	0.076786	SiteClass[FBgn0051485|tRNA:CR31485:Psi|UPSTREAM|214;FBgn0026162|tRNA:K5:84ABd|UPSTREAM|342;FBgn0261504|7SLRNA:CR42652|DOWNSTREAM|581],TranscriptAnnot[UPSTREAM(MODIFIER||342|||tRNA:K5:84ABd|tRNA|NON_CODING|FBtr0081622||1);UPSTREAM(MODIFIER||214|||tRNA:CR31485:Psi|pseudogene|NON_CODING|FBtr0081662||1);DOWNSTREAM(MODIFIER||581|||7SLRNA:CR42652|ncRNA|NON_CODING|FBtr0302398||1);INTERGENIC(MODIFIER||||…	The gene Signal recognition particle 7SL RNA CR42652 is referred to in FlyBase by the symbol Dmel\7SLRNA:CR42652 (CR42652, FBgn0261504). It is a non_protein_coding_gene from Drosophila melanogaster. It has one annotated transcript. Gene sequence location is 3R:6820133..6820431. It has the cytological map location 84A5. Its molecular function is unknown. The biological processes in which it is inv…
FBtr0081622	3R_2645274_SNP	G	T	0.1273	21	144	3.97e-06	0.076786	SiteClass[FBgn0051485|tRNA:CR31485:Psi|UPSTREAM|214;FBgn0026162|tRNA:K5:84ABd|UPSTREAM|342;FBgn0261504|7SLRNA:CR42652|DOWNSTREAM|581],TranscriptAnnot[UPSTREAM(MODIFIER||342|||tRNA:K5:84ABd|tRNA|NON_CODING|FBtr0081622||1);UPSTREAM(MODIFIER||214|||tRNA:CR31485:Psi|pseudogene|NON_CODING|FBtr0081662||1);DOWNSTREAM(MODIFIER||581|||7SLRNA:CR42652|ncRNA|NON_CODING|FBtr0302398||1);INTERGENIC(MODIFIER||||…	-
FBtr0081662	3R_2645274_SNP	G	T	0.1273	21	144	3.97e-06	0.076786	SiteClass[FBgn0051485|tRNA:CR31485:Psi|UPSTREAM|214;FBgn0026162|tRNA:K5:84ABd|UPSTREAM|342;FBgn0261504|7SLRNA:CR42652|DOWNSTREAM|581],TranscriptAnnot[UPSTREAM(MODIFIER||342|||tRNA:K5:84ABd|tRNA|NON_CODING|FBtr0081622||1);UPSTREAM(MODIFIER||214|||tRNA:CR31485:Psi|pseudogene|NON_CODING|FBtr0081662||1);DOWNSTREAM(MODIFIER||581|||7SLRNA:CR42652|ncRNA|NON_CODING|FBtr0302398||1);INTERGENIC(MODIFIER||||…	-
FBtr0302398	3R_2645274_SNP	G	T	0.1273	21	144	3.97e-06	0.076786	SiteClass[FBgn0051485|tRNA:CR31485:Psi|UPSTREAM|214;FBgn0026162|tRNA:K5:84ABd|UPSTREAM|342;FBgn0261504|7SLRNA:CR42652|DOWNSTREAM|581],TranscriptAnnot[UPSTREAM(MODIFIER||342|||tRNA:K5:84ABd|tRNA|NON_CODING|FBtr0081622||1);UPSTREAM(MODIFIER||214|||tRNA:CR31485:Psi|pseudogene|NON_CODING|FBtr0081662||1);DOWNSTREAM(MODIFIER||581|||7SLRNA:CR42652|ncRNA|NON_CODING|FBtr0302398||1);INTERGENIC(MODIFIER||||…	-
FBgn0037801	3R_6077502_SNP	T	A	0.08982	15	152	4.15e-06	0.0788336	SiteClass[FBgn0037801|CG3999|INTRON|0;FBgn0261928|CG42795|DOWNSTREAM|503],TranscriptAnnot[DOWNSTREAM(MODIFIER||503||2904|CG42795|protein_coding|CODING|FBtr0332437||1);DOWNSTREAM(MODIFIER||503||2928|CG42795|protein_coding|CODING|FBtr0345170||1);INTRON(MODIFIER||||985|CG3999|protein_coding|CODING|FBtr0082225|1|1);INTRON(MODIFIER||||985|CG3999|protein_coding|CODING|FBtr0337048|1|1)]	This gene is referred to in FlyBase by the symbol Dmel\CG3999 (FBgn0037801). It is a protein_coding_gene from Drosophila melanogaster. It has 2 annotated transcripts and 2 polypeptides (1 unique). Gene sequence location is 3R:10251518..10255268. It has the cytological map location 86A2. Protein features are: Glycine cleavage system P protein; Glycine cleavage system P-protein, N-terminal; Glycine…
FBgn0261928	3R_6077502_SNP	T	A	0.08982	15	152	4.15e-06	0.0788336	SiteClass[FBgn0037801|CG3999|INTRON|0;FBgn0261928|CG42795|DOWNSTREAM|503],TranscriptAnnot[DOWNSTREAM(MODIFIER||503||2904|CG42795|protein_coding|CODING|FBtr0332437||1);DOWNSTREAM(MODIFIER||503||2928|CG42795|protein_coding|CODING|FBtr0345170||1);INTRON(MODIFIER||||985|CG3999|protein_coding|CODING|FBtr0082225|1|1);INTRON(MODIFIER||||985|CG3999|protein_coding|CODING|FBtr0337048|1|1)]	This gene is referred to in FlyBase by the symbol Dmel\CG42795 (FBgn0261928). It is a protein_coding_gene from Drosophila melanogaster. It has 6 annotated transcripts and 6 polypeptides (all unique). Gene sequence location is 3R:10225690..10251277. It has the cytological map location 86A1. Protein features are: Rab-GTPase-TBC domain; TBC1 domain family member 30, C-terminal. Its molecular functio…
FBtr0332437	3R_6077502_SNP	T	A	0.08982	15	152	4.15e-06	0.0788336	SiteClass[FBgn0037801|CG3999|INTRON|0;FBgn0261928|CG42795|DOWNSTREAM|503],TranscriptAnnot[DOWNSTREAM(MODIFIER||503||2904|CG42795|protein_coding|CODING|FBtr0332437||1);DOWNSTREAM(MODIFIER||503||2928|CG42795|protein_coding|CODING|FBtr0345170||1);INTRON(MODIFIER||||985|CG3999|protein_coding|CODING|FBtr0082225|1|1);INTRON(MODIFIER||||985|CG3999|protein_coding|CODING|FBtr0337048|1|1)]	-
FBtr0345170	3R_6077502_SNP	T	A	0.08982	15	152	4.15e-06	0.0788336	SiteClass[FBgn0037801|CG3999|INTRON|0;FBgn0261928|CG42795|DOWNSTREAM|503],TranscriptAnnot[DOWNSTREAM(MODIFIER||503||2904|CG42795|protein_coding|CODING|FBtr0332437||1);DOWNSTREAM(MODIFIER||503||2928|CG42795|protein_coding|CODING|FBtr0345170||1);INTRON(MODIFIER||||985|CG3999|protein_coding|CODING|FBtr0082225|1|1);INTRON(MODIFIER||||985|CG3999|protein_coding|CODING|FBtr0337048|1|1)]	-
FBtr0082225	3R_6077502_SNP	T	A	0.08982	15	152	4.15e-06	0.0788336	SiteClass[FBgn0037801|CG3999|INTRON|0;FBgn0261928|CG42795|DOWNSTREAM|503],TranscriptAnnot[DOWNSTREAM(MODIFIER||503||2904|CG42795|protein_coding|CODING|FBtr0332437||1);DOWNSTREAM(MODIFIER||503||2928|CG42795|protein_coding|CODING|FBtr0345170||1);INTRON(MODIFIER||||985|CG3999|protein_coding|CODING|FBtr0082225|1|1);INTRON(MODIFIER||||985|CG3999|protein_coding|CODING|FBtr0337048|1|1)]	-
FBtr0337048	3R_6077502_SNP	T	A	0.08982	15	152	4.15e-06	0.0788336	SiteClass[FBgn0037801|CG3999|INTRON|0;FBgn0261928|CG42795|DOWNSTREAM|503],TranscriptAnnot[DOWNSTREAM(MODIFIER||503||2904|CG42795|protein_coding|CODING|FBtr0332437||1);DOWNSTREAM(MODIFIER||503||2928|CG42795|protein_coding|CODING|FBtr0345170||1);INTRON(MODIFIER||||985|CG3999|protein_coding|CODING|FBtr0082225|1|1);INTRON(MODIFIER||||985|CG3999|protein_coding|CODING|FBtr0337048|1|1)]	-
FBgn0263864	2R_12909767_SNP	T	G	0.08	14	161	4.27e-06	0.0803076	SiteClass[FBgn0263864|Ark|SYNONYMOUS_CODING|0],TranscriptAnnot[SYNONYMOUS_CODING(LOW|SILENT|gtG/gtT|V247|1440|Ark|protein_coding|CODING|FBtr0086968|3|1);SYNONYMOUS_CODING(LOW|SILENT|gtG/gtT|V247|531|Ark|protein_coding|CODING|FBtr0086967|3|1)]	The gene Death-associated APAF1-related killer is referred to in FlyBase by the symbol Dmel\Dark (CG6829, FBgn0263864). It is a protein_coding_gene from Drosophila melanogaster. It has 2 annotated transcripts and 2 polypeptides (all unique). Gene sequence location is 2R:17020027..17026703. It has the cytological map location 53E4-54A2. Protein features are: NB-ARC; P-loop containing nucleoside tr…
FBtr0086968	2R_12909767_SNP	T	G	0.08	14	161	4.27e-06	0.0803076	SiteClass[FBgn0263864|Ark|SYNONYMOUS_CODING|0],TranscriptAnnot[SYNONYMOUS_CODING(LOW|SILENT|gtG/gtT|V247|1440|Ark|protein_coding|CODING|FBtr0086968|3|1);SYNONYMOUS_CODING(LOW|SILENT|gtG/gtT|V247|531|Ark|protein_coding|CODING|FBtr0086967|3|1)]	-
FBtr0086967	2R_12909767_SNP	T	G	0.08	14	161	4.27e-06	0.0803076	SiteClass[FBgn0263864|Ark|SYNONYMOUS_CODING|0],TranscriptAnnot[SYNONYMOUS_CODING(LOW|SILENT|gtG/gtT|V247|1440|Ark|protein_coding|CODING|FBtr0086968|3|1);SYNONYMOUS_CODING(LOW|SILENT|gtG/gtT|V247|531|Ark|protein_coding|CODING|FBtr0086967|3|1)]	-
FBgn0264490	3R_17839136_SNP	A	G	0.05682	10	166	4.34e-06	0.0808082	SiteClass[FBgn0264490|Eip93F|UTR_3_PRIME|0],TranscriptAnnot[UTR_3_PRIME(MODIFIER||6910||1165|Eip93F|protein_coding|CODING|FBtr0084169|6|1);UTR_3_PRIME(MODIFIER||6841||1188|Eip93F|protein_coding|CODING|FBtr0330384|6|1)]	The gene Ecdysone-induced protein 93F is referred to in FlyBase by the symbol Dmel\Eip93F (CG18389, FBgn0264490). It is a protein_coding_gene from Drosophila melanogaster. It has 3 annotated transcripts and 3 polypeptides (all unique). Gene sequence location is 3R:21949114..22014539. It has the cytological map location 93F5-93F6. Protein features are: DNA binding HTH domain, Psq-type; Homeodomain…
FBtr0084169	3R_17839136_SNP	A	G	0.05682	10	166	4.34e-06	0.0808082	SiteClass[FBgn0264490|Eip93F|UTR_3_PRIME|0],TranscriptAnnot[UTR_3_PRIME(MODIFIER||6910||1165|Eip93F|protein_coding|CODING|FBtr0084169|6|1);UTR_3_PRIME(MODIFIER||6841||1188|Eip93F|protein_coding|CODING|FBtr0330384|6|1)]	-
FBtr0330384	3R_17839136_SNP	A	G	0.05682	10	166	4.34e-06	0.0808082	SiteClass[FBgn0264490|Eip93F|UTR_3_PRIME|0],TranscriptAnnot[UTR_3_PRIME(MODIFIER||6910||1165|Eip93F|protein_coding|CODING|FBtr0084169|6|1);UTR_3_PRIME(MODIFIER||6841||1188|Eip93F|protein_coding|CODING|FBtr0330384|6|1)]	-
FBgn0039593	3R_24498485_SNP	T	C	0.05233	9	163	4.39e-06	0.0808447	SiteClass[FBgn0039593|CG9989|DOWNSTREAM|742],TranscriptAnnot[DOWNSTREAM(MODIFIER||742||370|CG9989|protein_coding|CODING|FBtr0085307||1);INTERGENIC(MODIFIER||||||||||1)]	The gene Stress induced DNase is referred to in FlyBase by the symbol Dmel\Sid (CG9989, FBgn0039593). It is a protein_coding_gene from Drosophila melanogaster. It has one annotated transcript and one polypeptide. Gene sequence location is 3R:28670704..28672021. It has the cytological map location 98E1. Protein features are: DNA/RNA non-specific endonuclease; Extracellular Endonuclease, subunit A.…
FBtr0085307	3R_24498485_SNP	T	C	0.05233	9	163	4.39e-06	0.0808447	SiteClass[FBgn0039593|CG9989|DOWNSTREAM|742],TranscriptAnnot[DOWNSTREAM(MODIFIER||742||370|CG9989|protein_coding|CODING|FBtr0085307||1);INTERGENIC(MODIFIER||||||||||1)]	-
FBgn0011259	2L_8620703_SNP	T	C	0.06286	11	164	4.5e-06	0.0813818	SiteClass[FBgn0011259|Sema-1a|INTRON|0;FBgn0051602|tRNA:CR31602|DOWNSTREAM|604],TranscriptAnnot[DOWNSTREAM(MODIFIER||604|||tRNA:CR31602|tRNA|NON_CODING|FBtr0079693||1);INTRON(MODIFIER||||899|Sema-1a|protein_coding|CODING|FBtr0079691|3|1);INTRON(MODIFIER||||905|Sema-1a|protein_coding|CODING|FBtr0303877|4|1);INTRON(MODIFIER||||905|Sema-1a|protein_coding|CODING|FBtr0303878|3|1);INTRON(MODIFIER||||82…	The gene Sema-1a is referred to in FlyBase by the symbol Dmel\Sema-1a (CG18405, FBgn0011259). It is a protein_coding_gene from Drosophila melanogaster. It has 7 annotated transcripts and 7 polypeptides (6 unique). Gene sequence location is 2L:8542147..8672041. It has the cytological map location 29E1-29E3. Protein features are: Plexin repeat; Plexin-like fold; Sema domain; Semaphorin; WD40/YVTN r…
FBgn0051602	2L_8620703_SNP	T	C	0.06286	11	164	4.5e-06	0.0813818	SiteClass[FBgn0011259|Sema-1a|INTRON|0;FBgn0051602|tRNA:CR31602|DOWNSTREAM|604],TranscriptAnnot[DOWNSTREAM(MODIFIER||604|||tRNA:CR31602|tRNA|NON_CODING|FBtr0079693||1);INTRON(MODIFIER||||899|Sema-1a|protein_coding|CODING|FBtr0079691|3|1);INTRON(MODIFIER||||905|Sema-1a|protein_coding|CODING|FBtr0303877|4|1);INTRON(MODIFIER||||905|Sema-1a|protein_coding|CODING|FBtr0303878|3|1);INTRON(MODIFIER||||82…	The gene transfer RNA:CR31602 is referred to in FlyBase by the symbol Dmel\tRNA:CR31602 (CR31602, FBgn0051602). It is a tRNA_gene from Drosophila melanogaster. It has one annotated transcript. Gene sequence location is 2L:8620028..8620099. It has the cytological map location 29E2. Its molecular function is described by: triplet codon-amino acid adaptor activity; GAC codon-amino acid adaptor activ…
FBtr0079693	2L_8620703_SNP	T	C	0.06286	11	164	4.5e-06	0.0813818	SiteClass[FBgn0011259|Sema-1a|INTRON|0;FBgn0051602|tRNA:CR31602|DOWNSTREAM|604],TranscriptAnnot[DOWNSTREAM(MODIFIER||604|||tRNA:CR31602|tRNA|NON_CODING|FBtr0079693||1);INTRON(MODIFIER||||899|Sema-1a|protein_coding|CODING|FBtr0079691|3|1);INTRON(MODIFIER||||905|Sema-1a|protein_coding|CODING|FBtr0303877|4|1);INTRON(MODIFIER||||905|Sema-1a|protein_coding|CODING|FBtr0303878|3|1);INTRON(MODIFIER||||82…	-
FBtr0079691	2L_8620703_SNP	T	C	0.06286	11	164	4.5e-06	0.0813818	SiteClass[FBgn0011259|Sema-1a|INTRON|0;FBgn0051602|tRNA:CR31602|DOWNSTREAM|604],TranscriptAnnot[DOWNSTREAM(MODIFIER||604|||tRNA:CR31602|tRNA|NON_CODING|FBtr0079693||1);INTRON(MODIFIER||||899|Sema-1a|protein_coding|CODING|FBtr0079691|3|1);INTRON(MODIFIER||||905|Sema-1a|protein_coding|CODING|FBtr0303877|4|1);INTRON(MODIFIER||||905|Sema-1a|protein_coding|CODING|FBtr0303878|3|1);INTRON(MODIFIER||||82…	-
FBtr0303877	2L_8620703_SNP	T	C	0.06286	11	164	4.5e-06	0.0813818	SiteClass[FBgn0011259|Sema-1a|INTRON|0;FBgn0051602|tRNA:CR31602|DOWNSTREAM|604],TranscriptAnnot[DOWNSTREAM(MODIFIER||604|||tRNA:CR31602|tRNA|NON_CODING|FBtr0079693||1);INTRON(MODIFIER||||899|Sema-1a|protein_coding|CODING|FBtr0079691|3|1);INTRON(MODIFIER||||905|Sema-1a|protein_coding|CODING|FBtr0303877|4|1);INTRON(MODIFIER||||905|Sema-1a|protein_coding|CODING|FBtr0303878|3|1);INTRON(MODIFIER||||82…	-
FBtr0303878	2L_8620703_SNP	T	C	0.06286	11	164	4.5e-06	0.0813818	SiteClass[FBgn0011259|Sema-1a|INTRON|0;FBgn0051602|tRNA:CR31602|DOWNSTREAM|604],TranscriptAnnot[DOWNSTREAM(MODIFIER||604|||tRNA:CR31602|tRNA|NON_CODING|FBtr0079693||1);INTRON(MODIFIER||||899|Sema-1a|protein_coding|CODING|FBtr0079691|3|1);INTRON(MODIFIER||||905|Sema-1a|protein_coding|CODING|FBtr0303877|4|1);INTRON(MODIFIER||||905|Sema-1a|protein_coding|CODING|FBtr0303878|3|1);INTRON(MODIFIER||||82…	-
FBtr0303879	2L_8620703_SNP	T	C	0.06286	11	164	4.5e-06	0.0813818	SiteClass[FBgn0011259|Sema-1a|INTRON|0;FBgn0051602|tRNA:CR31602|DOWNSTREAM|604],TranscriptAnnot[DOWNSTREAM(MODIFIER||604|||tRNA:CR31602|tRNA|NON_CODING|FBtr0079693||1);INTRON(MODIFIER||||899|Sema-1a|protein_coding|CODING|FBtr0079691|3|1);INTRON(MODIFIER||||905|Sema-1a|protein_coding|CODING|FBtr0303877|4|1);INTRON(MODIFIER||||905|Sema-1a|protein_coding|CODING|FBtr0303878|3|1);INTRON(MODIFIER||||82…	-
FBtr0329930	2L_8620703_SNP	T	C	0.06286	11	164	4.5e-06	0.0813818	SiteClass[FBgn0011259|Sema-1a|INTRON|0;FBgn0051602|tRNA:CR31602|DOWNSTREAM|604],TranscriptAnnot[DOWNSTREAM(MODIFIER||604|||tRNA:CR31602|tRNA|NON_CODING|FBtr0079693||1);INTRON(MODIFIER||||899|Sema-1a|protein_coding|CODING|FBtr0079691|3|1);INTRON(MODIFIER||||905|Sema-1a|protein_coding|CODING|FBtr0303877|4|1);INTRON(MODIFIER||||905|Sema-1a|protein_coding|CODING|FBtr0303878|3|1);INTRON(MODIFIER||||82…	-
FBtr0329931	2L_8620703_SNP	T	C	0.06286	11	164	4.5e-06	0.0813818	SiteClass[FBgn0011259|Sema-1a|INTRON|0;FBgn0051602|tRNA:CR31602|DOWNSTREAM|604],TranscriptAnnot[DOWNSTREAM(MODIFIER||604|||tRNA:CR31602|tRNA|NON_CODING|FBtr0079693||1);INTRON(MODIFIER||||899|Sema-1a|protein_coding|CODING|FBtr0079691|3|1);INTRON(MODIFIER||||905|Sema-1a|protein_coding|CODING|FBtr0303877|4|1);INTRON(MODIFIER||||905|Sema-1a|protein_coding|CODING|FBtr0303878|3|1);INTRON(MODIFIER||||82…	-
FBtr0329932	2L_8620703_SNP	T	C	0.06286	11	164	4.5e-06	0.0813818	SiteClass[FBgn0011259|Sema-1a|INTRON|0;FBgn0051602|tRNA:CR31602|DOWNSTREAM|604],TranscriptAnnot[DOWNSTREAM(MODIFIER||604|||tRNA:CR31602|tRNA|NON_CODING|FBtr0079693||1);INTRON(MODIFIER||||899|Sema-1a|protein_coding|CODING|FBtr0079691|3|1);INTRON(MODIFIER||||905|Sema-1a|protein_coding|CODING|FBtr0303877|4|1);INTRON(MODIFIER||||905|Sema-1a|protein_coding|CODING|FBtr0303878|3|1);INTRON(MODIFIER||||82…	-
FBgn0004511	X_11673360_SNP	A	G	0.05618	10	168	4.5e-06	0.0813818	SiteClass[FBgn0004511|dy|UPSTREAM|543],TranscriptAnnot[UPSTREAM(MODIFIER||543||699|dy|protein_coding|CODING|FBtr0073612||1);INTERGENIC(MODIFIER||||||||||1)]	The gene dusky is referred to in FlyBase by the symbol Dmel\dy (CG9355, FBgn0004511). It is a protein_coding_gene from Drosophila melanogaster. It has one annotated transcript and one polypeptide. Gene sequence location is X:11769769..11778784. It has the cytological map location 10E2. Protein features are: Zona pellucida domain. Its molecular function is unknown. It is involved in the biological…
FBtr0073612	X_11673360_SNP	A	G	0.05618	10	168	4.5e-06	0.0813818	SiteClass[FBgn0004511|dy|UPSTREAM|543],TranscriptAnnot[UPSTREAM(MODIFIER||543||699|dy|protein_coding|CODING|FBtr0073612||1);INTERGENIC(MODIFIER||||||||||1)]	-
FBgn0033702	2R_8115876_SNP	T	C	0.2754	46	121	4.56e-06	0.0817046	SiteClass[FBgn0033702|CG8854|INTRON|0],TranscriptAnnot[INTRON(MODIFIER||||392|CG8854|protein_coding|CODING|FBtr0331944|1|1)]	This gene is referred to in FlyBase by the symbol Dmel\CG8854 (FBgn0033702). It is a protein_coding_gene from Drosophila melanogaster. It has 2 annotated transcripts and 2 polypeptides (1 unique). Gene sequence location is 2R:12224461..12229310. It has the cytological map location 48E10. Its molecular function is described by: . It is involved in the biological process described with: . One allel…
FBtr0331944	2R_8115876_SNP	T	C	0.2754	46	121	4.56e-06	0.0817046	SiteClass[FBgn0033702|CG8854|INTRON|0],TranscriptAnnot[INTRON(MODIFIER||||392|CG8854|protein_coding|CODING|FBtr0331944|1|1)]	-
FBgn0036342	3L_13040715_SNP	T	C	0.0618	11	167	4.88e-06	0.0855718	SiteClass[FBgn0036342|CG11279|DOWNSTREAM|90;FBgn0036341|Syx13|DOWNSTREAM|721],TranscriptAnnot[UTR_3_PRIME(MODIFIER||163||102|CG11279|protein_coding|CODING|FBtr0332077|2|1);UTR_3_PRIME(MODIFIER||163||102|CG11279|protein_coding|CODING|FBtr0345366|2|1);DOWNSTREAM(MODIFIER||721||284|Syx13|protein_coding|CODING|FBtr0075886||1);DOWNSTREAM(MODIFIER||721||284|Syx13|protein_coding|CODING|FBtr0332076||1);D…	This gene is referred to in FlyBase by the symbol Dmel\CG11279 (FBgn0036342). It is a protein_coding_gene from Drosophila melanogaster. It has 3 annotated transcripts and 3 polypeptides (1 unique). Gene sequence location is 3L:13046977..13048919. It has the cytological map location 69F6. Protein features are: Uncharacterised protein family UPF0390. Its molecular function is unknown. The biologica…
FBgn0036341	3L_13040715_SNP	T	C	0.0618	11	167	4.88e-06	0.0855718	SiteClass[FBgn0036342|CG11279|DOWNSTREAM|90;FBgn0036341|Syx13|DOWNSTREAM|721],TranscriptAnnot[UTR_3_PRIME(MODIFIER||163||102|CG11279|protein_coding|CODING|FBtr0332077|2|1);UTR_3_PRIME(MODIFIER||163||102|CG11279|protein_coding|CODING|FBtr0345366|2|1);DOWNSTREAM(MODIFIER||721||284|Syx13|protein_coding|CODING|FBtr0075886||1);DOWNSTREAM(MODIFIER||721||284|Syx13|protein_coding|CODING|FBtr0332076||1);D…	The gene Syntaxin 13 is referred to in FlyBase by the symbol Dmel\Syx13 (CG11278, FBgn0036341). It is a protein_coding_gene from Drosophila melanogaster. It has 2 annotated transcripts and 2 polypeptides (1 unique). Gene sequence location is 3L:13044434..13046894. It has the cytological map location 69F6. Protein features are: Syntaxin/epimorphin, conserved site; Target SNARE coiled-coil homology…
FBtr0332077	3L_13040715_SNP	T	C	0.0618	11	167	4.88e-06	0.0855718	SiteClass[FBgn0036342|CG11279|DOWNSTREAM|90;FBgn0036341|Syx13|DOWNSTREAM|721],TranscriptAnnot[UTR_3_PRIME(MODIFIER||163||102|CG11279|protein_coding|CODING|FBtr0332077|2|1);UTR_3_PRIME(MODIFIER||163||102|CG11279|protein_coding|CODING|FBtr0345366|2|1);DOWNSTREAM(MODIFIER||721||284|Syx13|protein_coding|CODING|FBtr0075886||1);DOWNSTREAM(MODIFIER||721||284|Syx13|protein_coding|CODING|FBtr0332076||1);D…	-
FBtr0345366	3L_13040715_SNP	T	C	0.0618	11	167	4.88e-06	0.0855718	SiteClass[FBgn0036342|CG11279|DOWNSTREAM|90;FBgn0036341|Syx13|DOWNSTREAM|721],TranscriptAnnot[UTR_3_PRIME(MODIFIER||163||102|CG11279|protein_coding|CODING|FBtr0332077|2|1);UTR_3_PRIME(MODIFIER||163||102|CG11279|protein_coding|CODING|FBtr0345366|2|1);DOWNSTREAM(MODIFIER||721||284|Syx13|protein_coding|CODING|FBtr0075886||1);DOWNSTREAM(MODIFIER||721||284|Syx13|protein_coding|CODING|FBtr0332076||1);D…	-
FBtr0075886	3L_13040715_SNP	T	C	0.0618	11	167	4.88e-06	0.0855718	SiteClass[FBgn0036342|CG11279|DOWNSTREAM|90;FBgn0036341|Syx13|DOWNSTREAM|721],TranscriptAnnot[UTR_3_PRIME(MODIFIER||163||102|CG11279|protein_coding|CODING|FBtr0332077|2|1);UTR_3_PRIME(MODIFIER||163||102|CG11279|protein_coding|CODING|FBtr0345366|2|1);DOWNSTREAM(MODIFIER||721||284|Syx13|protein_coding|CODING|FBtr0075886||1);DOWNSTREAM(MODIFIER||721||284|Syx13|protein_coding|CODING|FBtr0332076||1);D…	-
FBtr0332076	3L_13040715_SNP	T	C	0.0618	11	167	4.88e-06	0.0855718	SiteClass[FBgn0036342|CG11279|DOWNSTREAM|90;FBgn0036341|Syx13|DOWNSTREAM|721],TranscriptAnnot[UTR_3_PRIME(MODIFIER||163||102|CG11279|protein_coding|CODING|FBtr0332077|2|1);UTR_3_PRIME(MODIFIER||163||102|CG11279|protein_coding|CODING|FBtr0345366|2|1);DOWNSTREAM(MODIFIER||721||284|Syx13|protein_coding|CODING|FBtr0075886||1);DOWNSTREAM(MODIFIER||721||284|Syx13|protein_coding|CODING|FBtr0332076||1);D…	-
FBtr0075887	3L_13040715_SNP	T	C	0.0618	11	167	4.88e-06	0.0855718	SiteClass[FBgn0036342|CG11279|DOWNSTREAM|90;FBgn0036341|Syx13|DOWNSTREAM|721],TranscriptAnnot[UTR_3_PRIME(MODIFIER||163||102|CG11279|protein_coding|CODING|FBtr0332077|2|1);UTR_3_PRIME(MODIFIER||163||102|CG11279|protein_coding|CODING|FBtr0345366|2|1);DOWNSTREAM(MODIFIER||721||284|Syx13|protein_coding|CODING|FBtr0075886||1);DOWNSTREAM(MODIFIER||721||284|Syx13|protein_coding|CODING|FBtr0332076||1);D…	-
FBgn0000247	3R_25637871_SNP	C	T	0.05682	10	166	4.9e-06	0.0855718	SiteClass[FBgn0000247|ca|SYNONYMOUS_CODING|0],TranscriptAnnot[SYNONYMOUS_CODING(LOW|SILENT|aaT/aaC|N1263|1961|ca|protein_coding|CODING|FBtr0346613|12|1);SYNONYMOUS_CODING(LOW|SILENT|aaT/aaC|N1263|1961|ca|protein_coding|CODING|FBtr0085484|12|1)]	The gene claret is referred to in FlyBase by the symbol Dmel\ca (CG31037, FBgn0000247). It is a protein_coding_gene from Drosophila melanogaster. It has 2 annotated transcripts and 2 polypeptides (1 unique). Gene sequence location is 3R:29806811..29815047. It has the cytological map location 99C2. Protein features are: Regulator of chromosome condensation 1/beta-lactamase-inhibitor protein II; Re…
FBtr0346613	3R_25637871_SNP	C	T	0.05682	10	166	4.9e-06	0.0855718	SiteClass[FBgn0000247|ca|SYNONYMOUS_CODING|0],TranscriptAnnot[SYNONYMOUS_CODING(LOW|SILENT|aaT/aaC|N1263|1961|ca|protein_coding|CODING|FBtr0346613|12|1);SYNONYMOUS_CODING(LOW|SILENT|aaT/aaC|N1263|1961|ca|protein_coding|CODING|FBtr0085484|12|1)]	-
FBtr0085484	3R_25637871_SNP	C	T	0.05682	10	166	4.9e-06	0.0855718	SiteClass[FBgn0000247|ca|SYNONYMOUS_CODING|0],TranscriptAnnot[SYNONYMOUS_CODING(LOW|SILENT|aaT/aaC|N1263|1961|ca|protein_coding|CODING|FBtr0346613|12|1);SYNONYMOUS_CODING(LOW|SILENT|aaT/aaC|N1263|1961|ca|protein_coding|CODING|FBtr0085484|12|1)]	-
FBgn0033834	2R_9283177_SNP	A	T	0.07821	14	165	4.91e-06	0.0855718	SiteClass[FBgn0033834|CG4744|NON_SYNONYMOUS_CODING|0],TranscriptAnnot[NON_SYNONYMOUS_CODING(MODERATE|MISSENSE|gAt/gTt|D1219V|1503|CG4744|protein_coding|CODING|FBtr0087717|1|1)]	This gene is referred to in FlyBase by the symbol Dmel\CG4744 (FBgn0033834). It is a protein_coding_gene from Drosophila melanogaster. It has one annotated transcript and one polypeptide. Gene sequence location is 2R:13394615..13399368. It has the cytological map location 50A3. Its molecular function is described by: . It is involved in the biological process described with: . 4 alleles are repor…
FBtr0087717	2R_9283177_SNP	A	T	0.07821	14	165	4.91e-06	0.0855718	SiteClass[FBgn0033834|CG4744|NON_SYNONYMOUS_CODING|0],TranscriptAnnot[NON_SYNONYMOUS_CODING(MODERATE|MISSENSE|gAt/gTt|D1219V|1503|CG4744|protein_coding|CODING|FBtr0087717|1|1)]	-
FBgn0037801	3R_6077488_SNP	C	T	0.08929	15	153	4.97e-06	0.0858175	SiteClass[FBgn0037801|CG3999|INTRON|0;FBgn0261928|CG42795|DOWNSTREAM|489],TranscriptAnnot[DOWNSTREAM(MODIFIER||489||2904|CG42795|protein_coding|CODING|FBtr0332437||1);DOWNSTREAM(MODIFIER||489||2928|CG42795|protein_coding|CODING|FBtr0345170||1);INTRON(MODIFIER||||985|CG3999|protein_coding|CODING|FBtr0082225|1|1);INTRON(MODIFIER||||985|CG3999|protein_coding|CODING|FBtr0337048|1|1)]	This gene is referred to in FlyBase by the symbol Dmel\CG3999 (FBgn0037801). It is a protein_coding_gene from Drosophila melanogaster. It has 2 annotated transcripts and 2 polypeptides (1 unique). Gene sequence location is 3R:10251518..10255268. It has the cytological map location 86A2. Protein features are: Glycine cleavage system P protein; Glycine cleavage system P-protein, N-terminal; Glycine…
FBgn0261928	3R_6077488_SNP	C	T	0.08929	15	153	4.97e-06	0.0858175	SiteClass[FBgn0037801|CG3999|INTRON|0;FBgn0261928|CG42795|DOWNSTREAM|489],TranscriptAnnot[DOWNSTREAM(MODIFIER||489||2904|CG42795|protein_coding|CODING|FBtr0332437||1);DOWNSTREAM(MODIFIER||489||2928|CG42795|protein_coding|CODING|FBtr0345170||1);INTRON(MODIFIER||||985|CG3999|protein_coding|CODING|FBtr0082225|1|1);INTRON(MODIFIER||||985|CG3999|protein_coding|CODING|FBtr0337048|1|1)]	This gene is referred to in FlyBase by the symbol Dmel\CG42795 (FBgn0261928). It is a protein_coding_gene from Drosophila melanogaster. It has 6 annotated transcripts and 6 polypeptides (all unique). Gene sequence location is 3R:10225690..10251277. It has the cytological map location 86A1. Protein features are: Rab-GTPase-TBC domain; TBC1 domain family member 30, C-terminal. Its molecular functio…
FBtr0332437	3R_6077488_SNP	C	T	0.08929	15	153	4.97e-06	0.0858175	SiteClass[FBgn0037801|CG3999|INTRON|0;FBgn0261928|CG42795|DOWNSTREAM|489],TranscriptAnnot[DOWNSTREAM(MODIFIER||489||2904|CG42795|protein_coding|CODING|FBtr0332437||1);DOWNSTREAM(MODIFIER||489||2928|CG42795|protein_coding|CODING|FBtr0345170||1);INTRON(MODIFIER||||985|CG3999|protein_coding|CODING|FBtr0082225|1|1);INTRON(MODIFIER||||985|CG3999|protein_coding|CODING|FBtr0337048|1|1)]	-
FBtr0345170	3R_6077488_SNP	C	T	0.08929	15	153	4.97e-06	0.0858175	SiteClass[FBgn0037801|CG3999|INTRON|0;FBgn0261928|CG42795|DOWNSTREAM|489],TranscriptAnnot[DOWNSTREAM(MODIFIER||489||2904|CG42795|protein_coding|CODING|FBtr0332437||1);DOWNSTREAM(MODIFIER||489||2928|CG42795|protein_coding|CODING|FBtr0345170||1);INTRON(MODIFIER||||985|CG3999|protein_coding|CODING|FBtr0082225|1|1);INTRON(MODIFIER||||985|CG3999|protein_coding|CODING|FBtr0337048|1|1)]	-
FBtr0082225	3R_6077488_SNP	C	T	0.08929	15	153	4.97e-06	0.0858175	SiteClass[FBgn0037801|CG3999|INTRON|0;FBgn0261928|CG42795|DOWNSTREAM|489],TranscriptAnnot[DOWNSTREAM(MODIFIER||489||2904|CG42795|protein_coding|CODING|FBtr0332437||1);DOWNSTREAM(MODIFIER||489||2928|CG42795|protein_coding|CODING|FBtr0345170||1);INTRON(MODIFIER||||985|CG3999|protein_coding|CODING|FBtr0082225|1|1);INTRON(MODIFIER||||985|CG3999|protein_coding|CODING|FBtr0337048|1|1)]	-
FBtr0337048	3R_6077488_SNP	C	T	0.08929	15	153	4.97e-06	0.0858175	SiteClass[FBgn0037801|CG3999|INTRON|0;FBgn0261928|CG42795|DOWNSTREAM|489],TranscriptAnnot[DOWNSTREAM(MODIFIER||489||2904|CG42795|protein_coding|CODING|FBtr0332437||1);DOWNSTREAM(MODIFIER||489||2928|CG42795|protein_coding|CODING|FBtr0345170||1);INTRON(MODIFIER||||985|CG3999|protein_coding|CODING|FBtr0082225|1|1);INTRON(MODIFIER||||985|CG3999|protein_coding|CODING|FBtr0337048|1|1)]	-
FBgn0033702	2R_8115873_SNP	A	T	0.2663	45	124	5.01e-06	0.0858175	SiteClass[FBgn0033702|CG8854|INTRON|0],TranscriptAnnot[INTRON(MODIFIER||||392|CG8854|protein_coding|CODING|FBtr0331944|1|1)]	This gene is referred to in FlyBase by the symbol Dmel\CG8854 (FBgn0033702). It is a protein_coding_gene from Drosophila melanogaster. It has 2 annotated transcripts and 2 polypeptides (1 unique). Gene sequence location is 2R:12224461..12229310. It has the cytological map location 48E10. Its molecular function is described by: . It is involved in the biological process described with: . One allel…
FBtr0331944	2R_8115873_SNP	A	T	0.2663	45	124	5.01e-06	0.0858175	SiteClass[FBgn0033702|CG8854|INTRON|0],TranscriptAnnot[INTRON(MODIFIER||||392|CG8854|protein_coding|CODING|FBtr0331944|1|1)]	-
FBgn0085412	3R_9590202_SNP	A	G	0.06286	11	164	5.11e-06	0.0867314	SiteClass[FBgn0085412|CG34383|UTR_3_PRIME|0],TranscriptAnnot[UTR_3_PRIME(MODIFIER||8842||1308|CG34383|protein_coding|CODING|FBtr0334567|16|1);UTR_3_PRIME(MODIFIER||3150||2020|CG34383|protein_coding|CODING|FBtr0334568|15|1);UTR_3_PRIME(MODIFIER||3150||1974|CG34383|protein_coding|CODING|FBtr0329898|14|1);UTR_3_PRIME(MODIFIER||1667||2050|CG34383|protein_coding|CODING|FBtr0112624|14|1)]	This gene is referred to in FlyBase by the symbol Dmel\CG34383 (FBgn0085412). It is a protein_coding_gene from Drosophila melanogaster. It has 10 annotated transcripts and 10 polypeptides (7 unique). Gene sequence location is 3R:13715207..13764667. It has the cytological map location 87F12-87F13. Protein features are: PH domain-like; Pleckstrin homology domain. Its molecular function is unknown. …
FBtr0334567	3R_9590202_SNP	A	G	0.06286	11	164	5.11e-06	0.0867314	SiteClass[FBgn0085412|CG34383|UTR_3_PRIME|0],TranscriptAnnot[UTR_3_PRIME(MODIFIER||8842||1308|CG34383|protein_coding|CODING|FBtr0334567|16|1);UTR_3_PRIME(MODIFIER||3150||2020|CG34383|protein_coding|CODING|FBtr0334568|15|1);UTR_3_PRIME(MODIFIER||3150||1974|CG34383|protein_coding|CODING|FBtr0329898|14|1);UTR_3_PRIME(MODIFIER||1667||2050|CG34383|protein_coding|CODING|FBtr0112624|14|1)]	-
FBtr0334568	3R_9590202_SNP	A	G	0.06286	11	164	5.11e-06	0.0867314	SiteClass[FBgn0085412|CG34383|UTR_3_PRIME|0],TranscriptAnnot[UTR_3_PRIME(MODIFIER||8842||1308|CG34383|protein_coding|CODING|FBtr0334567|16|1);UTR_3_PRIME(MODIFIER||3150||2020|CG34383|protein_coding|CODING|FBtr0334568|15|1);UTR_3_PRIME(MODIFIER||3150||1974|CG34383|protein_coding|CODING|FBtr0329898|14|1);UTR_3_PRIME(MODIFIER||1667||2050|CG34383|protein_coding|CODING|FBtr0112624|14|1)]	-
FBtr0329898	3R_9590202_SNP	A	G	0.06286	11	164	5.11e-06	0.0867314	SiteClass[FBgn0085412|CG34383|UTR_3_PRIME|0],TranscriptAnnot[UTR_3_PRIME(MODIFIER||8842||1308|CG34383|protein_coding|CODING|FBtr0334567|16|1);UTR_3_PRIME(MODIFIER||3150||2020|CG34383|protein_coding|CODING|FBtr0334568|15|1);UTR_3_PRIME(MODIFIER||3150||1974|CG34383|protein_coding|CODING|FBtr0329898|14|1);UTR_3_PRIME(MODIFIER||1667||2050|CG34383|protein_coding|CODING|FBtr0112624|14|1)]	-
FBtr0112624	3R_9590202_SNP	A	G	0.06286	11	164	5.11e-06	0.0867314	SiteClass[FBgn0085412|CG34383|UTR_3_PRIME|0],TranscriptAnnot[UTR_3_PRIME(MODIFIER||8842||1308|CG34383|protein_coding|CODING|FBtr0334567|16|1);UTR_3_PRIME(MODIFIER||3150||2020|CG34383|protein_coding|CODING|FBtr0334568|15|1);UTR_3_PRIME(MODIFIER||3150||1974|CG34383|protein_coding|CODING|FBtr0329898|14|1);UTR_3_PRIME(MODIFIER||1667||2050|CG34383|protein_coding|CODING|FBtr0112624|14|1)]	-
FBgn0003731	2R_17426248_SNP	A	G	0.0678	12	165	5.39e-06	0.0881398	SiteClass[FBgn0003731|Egfr|INTRON|0;FBgn0069056|CG33226|NON_SYNONYMOUS_CODING|0;FBgn0050287|CG30287|UPSTREAM|728;FBgn0260477|CG30283|DOWNSTREAM|841],TranscriptAnnot[NON_SYNONYMOUS_CODING(MODERATE|MISSENSE|gCc/gTc|A147V|292|CG33226|protein_coding|CODING|FBtr0308585|3|1);UPSTREAM(MODIFIER||728||284|CG30287|protein_coding|CODING|FBtr0071695||1);DOWNSTREAM(MODIFIER||841||273|CG30283|protein_coding|CO…	The gene Epidermal growth factor receptor is referred to in FlyBase by the symbol Dmel\Egfr (CG10079, FBgn0003731). It is a protein_coding_gene from Drosophila melanogaster. It has 2 annotated transcripts and 2 polypeptides (all unique). Gene sequence location is 2R:21522420..21559977. It has the cytological map location 57E9-57F1. Protein features are: 14-3-3 domain; 14-3-3 protein; 14-3-3 prote…
FBgn0069056	2R_17426248_SNP	A	G	0.0678	12	165	5.39e-06	0.0881398	SiteClass[FBgn0003731|Egfr|INTRON|0;FBgn0069056|CG33226|NON_SYNONYMOUS_CODING|0;FBgn0050287|CG30287|UPSTREAM|728;FBgn0260477|CG30283|DOWNSTREAM|841],TranscriptAnnot[NON_SYNONYMOUS_CODING(MODERATE|MISSENSE|gCc/gTc|A147V|292|CG33226|protein_coding|CODING|FBtr0308585|3|1);UPSTREAM(MODIFIER||728||284|CG30287|protein_coding|CODING|FBtr0071695||1);DOWNSTREAM(MODIFIER||841||273|CG30283|protein_coding|CO…	This gene is referred to in FlyBase by the symbol Dmel\CG33226 (FBgn0069056). It is a protein_coding_gene from Drosophila melanogaster. It has one annotated transcript and one polypeptide. Gene sequence location is 2R:21538250..21539293. It has the cytological map location 57E11. Protein features are: Peptidase S1, PA clan; Peptidase S1, trypsin family, active site; Peptidase S1A, chymotrypsin-ty…
FBgn0050287	2R_17426248_SNP	A	G	0.0678	12	165	5.39e-06	0.0881398	SiteClass[FBgn0003731|Egfr|INTRON|0;FBgn0069056|CG33226|NON_SYNONYMOUS_CODING|0;FBgn0050287|CG30287|UPSTREAM|728;FBgn0260477|CG30283|DOWNSTREAM|841],TranscriptAnnot[NON_SYNONYMOUS_CODING(MODERATE|MISSENSE|gCc/gTc|A147V|292|CG33226|protein_coding|CODING|FBtr0308585|3|1);UPSTREAM(MODIFIER||728||284|CG30287|protein_coding|CODING|FBtr0071695||1);DOWNSTREAM(MODIFIER||841||273|CG30283|protein_coding|CO…	This gene is referred to in FlyBase by the symbol Dmel\CG30287 (FBgn0050287). It is a protein_coding_gene from Drosophila melanogaster. It has one annotated transcript and one polypeptide. Gene sequence location is 2R:21536894..21538015. It has the cytological map location 57E10-57E11. Protein features are: Peptidase S1, PA clan; Peptidase S1, trypsin family, active site; Peptidase S1A, chymotryp…
FBgn0260477	2R_17426248_SNP	A	G	0.0678	12	165	5.39e-06	0.0881398	SiteClass[FBgn0003731|Egfr|INTRON|0;FBgn0069056|CG33226|NON_SYNONYMOUS_CODING|0;FBgn0050287|CG30287|UPSTREAM|728;FBgn0260477|CG30283|DOWNSTREAM|841],TranscriptAnnot[NON_SYNONYMOUS_CODING(MODERATE|MISSENSE|gCc/gTc|A147V|292|CG33226|protein_coding|CODING|FBtr0308585|3|1);UPSTREAM(MODIFIER||728||284|CG30287|protein_coding|CODING|FBtr0071695||1);DOWNSTREAM(MODIFIER||841||273|CG30283|protein_coding|CO…	This gene is referred to in FlyBase by the symbol Dmel\CG30283 (FBgn0260477). It is a protein_coding_gene from Drosophila melanogaster. It has one annotated transcript and one polypeptide. Gene sequence location is 2R:21539584..21540573. It has the cytological map location 57E11. Protein features are: Peptidase S1, PA clan; Peptidase S1, trypsin family, active site; Peptidase S1A, chymotrypsin-ty…
FBtr0308585	2R_17426248_SNP	A	G	0.0678	12	165	5.39e-06	0.0881398	SiteClass[FBgn0003731|Egfr|INTRON|0;FBgn0069056|CG33226|NON_SYNONYMOUS_CODING|0;FBgn0050287|CG30287|UPSTREAM|728;FBgn0260477|CG30283|DOWNSTREAM|841],TranscriptAnnot[NON_SYNONYMOUS_CODING(MODERATE|MISSENSE|gCc/gTc|A147V|292|CG33226|protein_coding|CODING|FBtr0308585|3|1);UPSTREAM(MODIFIER||728||284|CG30287|protein_coding|CODING|FBtr0071695||1);DOWNSTREAM(MODIFIER||841||273|CG30283|protein_coding|CO…	-
FBtr0071695	2R_17426248_SNP	A	G	0.0678	12	165	5.39e-06	0.0881398	SiteClass[FBgn0003731|Egfr|INTRON|0;FBgn0069056|CG33226|NON_SYNONYMOUS_CODING|0;FBgn0050287|CG30287|UPSTREAM|728;FBgn0260477|CG30283|DOWNSTREAM|841],TranscriptAnnot[NON_SYNONYMOUS_CODING(MODERATE|MISSENSE|gCc/gTc|A147V|292|CG33226|protein_coding|CODING|FBtr0308585|3|1);UPSTREAM(MODIFIER||728||284|CG30287|protein_coding|CODING|FBtr0071695||1);DOWNSTREAM(MODIFIER||841||273|CG30283|protein_coding|CO…	-
FBtr0300950	2R_17426248_SNP	A	G	0.0678	12	165	5.39e-06	0.0881398	SiteClass[FBgn0003731|Egfr|INTRON|0;FBgn0069056|CG33226|NON_SYNONYMOUS_CODING|0;FBgn0050287|CG30287|UPSTREAM|728;FBgn0260477|CG30283|DOWNSTREAM|841],TranscriptAnnot[NON_SYNONYMOUS_CODING(MODERATE|MISSENSE|gCc/gTc|A147V|292|CG33226|protein_coding|CODING|FBtr0308585|3|1);UPSTREAM(MODIFIER||728||284|CG30287|protein_coding|CODING|FBtr0071695||1);DOWNSTREAM(MODIFIER||841||273|CG30283|protein_coding|CO…	-
FBtr0071653	2R_17426248_SNP	A	G	0.0678	12	165	5.39e-06	0.0881398	SiteClass[FBgn0003731|Egfr|INTRON|0;FBgn0069056|CG33226|NON_SYNONYMOUS_CODING|0;FBgn0050287|CG30287|UPSTREAM|728;FBgn0260477|CG30283|DOWNSTREAM|841],TranscriptAnnot[NON_SYNONYMOUS_CODING(MODERATE|MISSENSE|gCc/gTc|A147V|292|CG33226|protein_coding|CODING|FBtr0308585|3|1);UPSTREAM(MODIFIER||728||284|CG30287|protein_coding|CODING|FBtr0071695||1);DOWNSTREAM(MODIFIER||841||273|CG30283|protein_coding|CO…	-
FBgn0264748	3L_18062512_SNP	A	G	0.07647	13	157	5.4e-06	0.0881398	SiteClass[FBgn0264748|CG44006|NON_SYNONYMOUS_CODING|0;FBgn0264747|CG44005|DOWNSTREAM|888],TranscriptAnnot[NON_SYNONYMOUS_CODING(MODERATE|MISSENSE|Cct/Tct|P192S|374|CG44006|protein_coding|CODING|FBtr0334132|2|1);DOWNSTREAM(MODIFIER||888||370|CG44005|protein_coding|CODING|FBtr0334131||1)]	This gene is referred to in FlyBase by the symbol Dmel\CG44006 (FBgn0264748). It is a protein_coding_gene from Drosophila melanogaster. It has one annotated transcript and one polypeptide. Gene sequence location is 3L:18068728..18070150. It has the cytological map location 75B6. Protein features are: Leucine-rich repeat domain, L domain-like. Its molecular function is unknown. The biological proc…
FBgn0264747	3L_18062512_SNP	A	G	0.07647	13	157	5.4e-06	0.0881398	SiteClass[FBgn0264748|CG44006|NON_SYNONYMOUS_CODING|0;FBgn0264747|CG44005|DOWNSTREAM|888],TranscriptAnnot[NON_SYNONYMOUS_CODING(MODERATE|MISSENSE|Cct/Tct|P192S|374|CG44006|protein_coding|CODING|FBtr0334132|2|1);DOWNSTREAM(MODIFIER||888||370|CG44005|protein_coding|CODING|FBtr0334131||1)]	This gene is referred to in FlyBase by the symbol Dmel\CG44005 (FBgn0264747). It is a protein_coding_gene from Drosophila melanogaster. It has 2 annotated transcripts and 2 polypeptides (1 unique). Gene sequence location is 3L:18070300..18072123. It has the cytological map location 75B6. Protein features are: Leucine-rich repeat domain, L domain-like. Its molecular function is unknown. The biolog…
FBtr0334132	3L_18062512_SNP	A	G	0.07647	13	157	5.4e-06	0.0881398	SiteClass[FBgn0264748|CG44006|NON_SYNONYMOUS_CODING|0;FBgn0264747|CG44005|DOWNSTREAM|888],TranscriptAnnot[NON_SYNONYMOUS_CODING(MODERATE|MISSENSE|Cct/Tct|P192S|374|CG44006|protein_coding|CODING|FBtr0334132|2|1);DOWNSTREAM(MODIFIER||888||370|CG44005|protein_coding|CODING|FBtr0334131||1)]	-
FBtr0334131	3L_18062512_SNP	A	G	0.07647	13	157	5.4e-06	0.0881398	SiteClass[FBgn0264748|CG44006|NON_SYNONYMOUS_CODING|0;FBgn0264747|CG44005|DOWNSTREAM|888],TranscriptAnnot[NON_SYNONYMOUS_CODING(MODERATE|MISSENSE|Cct/Tct|P192S|374|CG44006|protein_coding|CODING|FBtr0334132|2|1);DOWNSTREAM(MODIFIER||888||370|CG44005|protein_coding|CODING|FBtr0334131||1)]	-
FBgn0033702	2R_8115875_SNP	A	G	0.2695	45	122	5.6e-06	0.0881398	SiteClass[FBgn0033702|CG8854|INTRON|0],TranscriptAnnot[INTRON(MODIFIER||||392|CG8854|protein_coding|CODING|FBtr0331944|1|1)]	This gene is referred to in FlyBase by the symbol Dmel\CG8854 (FBgn0033702). It is a protein_coding_gene from Drosophila melanogaster. It has 2 annotated transcripts and 2 polypeptides (1 unique). Gene sequence location is 2R:12224461..12229310. It has the cytological map location 48E10. Its molecular function is described by: . It is involved in the biological process described with: . One allel…
FBtr0331944	2R_8115875_SNP	A	G	0.2695	45	122	5.6e-06	0.0881398	SiteClass[FBgn0033702|CG8854|INTRON|0],TranscriptAnnot[INTRON(MODIFIER||||392|CG8854|protein_coding|CODING|FBtr0331944|1|1)]	-
FBgn0039178	3R_20113119_SNP	A	G	0.1824	31	139	5.61e-06	0.0881398	SiteClass[FBgn0039178|CG6356|INTRON|0],TranscriptAnnot[INTRON(MODIFIER||||570|CG6356|protein_coding|CODING|FBtr0084601|5|1)]	This gene is referred to in FlyBase by the symbol Dmel\CG6356 (FBgn0039178). It is a protein_coding_gene from Drosophila melanogaster. It has one annotated transcript and one polypeptide. Gene sequence location is 3R:24283955..24288617. It has the cytological map location 95F9. Protein features are: Major facilitator superfamily domain; Major facilitator, sugar transporter-like. Its molecular fun…
FBtr0084601	3R_20113119_SNP	A	G	0.1824	31	139	5.61e-06	0.0881398	SiteClass[FBgn0039178|CG6356|INTRON|0],TranscriptAnnot[INTRON(MODIFIER||||570|CG6356|protein_coding|CODING|FBtr0084601|5|1)]	-
FBgn0028573	3L_11955407_SNP	A	G	0.08	14	161	5.94e-06	0.0924981	SiteClass[FBgn0028573|prc|SYNONYMOUS_CODING|0],TranscriptAnnot[SYNONYMOUS_CODING(LOW|SILENT|ggC/ggT|G815|1713|prc|protein_coding|CODING|FBtr0076064|6|1)]	The gene pericardin is referred to in FlyBase by the symbol Dmel\prc (CG5700, FBgn0028573). It is a protein_coding_gene from Drosophila melanogaster. It has one annotated transcript and one polypeptide. Gene sequence location is 3L:11958872..11966131. It has the cytological map location 68E3-68E4. Protein features are: Pericardin-like prepeat. Its molecular function is unknown. It is involved in …
FBtr0076064	3L_11955407_SNP	A	G	0.08	14	161	5.94e-06	0.0924981	SiteClass[FBgn0028573|prc|SYNONYMOUS_CODING|0],TranscriptAnnot[SYNONYMOUS_CODING(LOW|SILENT|ggC/ggT|G815|1713|prc|protein_coding|CODING|FBtr0076064|6|1)]	-
FBgn0051481	3R_2538332_SNP	A	G	0.09202	15	148	6.05e-06	0.0928155	SiteClass[FBgn0051481|pb|INTRON|0],TranscriptAnnot[INTRON(MODIFIER||||777|pb|protein_coding|CODING|FBtr0089277|3|1);INTRON(MODIFIER||||772|pb|protein_coding|CODING|FBtr0089279|2|1);INTRON(MODIFIER||||782|pb|protein_coding|CODING|FBtr0089276|3|1);INTRON(MODIFIER||||777|pb|protein_coding|CODING|FBtr0089278|2|1)]	The gene proboscipedia is referred to in FlyBase by the symbol Dmel\pb (CG31481, FBgn0051481). It is a protein_coding_gene from Drosophila melanogaster. It has 4 annotated transcripts and 4 polypeptides (all unique). Gene sequence location is 3R:6707800..6742063. It has the cytological map location 84A5. Protein features are: Homeobox domain; Homeobox protein, antennapedia type, conserved site; H…
FBtr0089277	3R_2538332_SNP	A	G	0.09202	15	148	6.05e-06	0.0928155	SiteClass[FBgn0051481|pb|INTRON|0],TranscriptAnnot[INTRON(MODIFIER||||777|pb|protein_coding|CODING|FBtr0089277|3|1);INTRON(MODIFIER||||772|pb|protein_coding|CODING|FBtr0089279|2|1);INTRON(MODIFIER||||782|pb|protein_coding|CODING|FBtr0089276|3|1);INTRON(MODIFIER||||777|pb|protein_coding|CODING|FBtr0089278|2|1)]	-
FBtr0089279	3R_2538332_SNP	A	G	0.09202	15	148	6.05e-06	0.0928155	SiteClass[FBgn0051481|pb|INTRON|0],TranscriptAnnot[INTRON(MODIFIER||||777|pb|protein_coding|CODING|FBtr0089277|3|1);INTRON(MODIFIER||||772|pb|protein_coding|CODING|FBtr0089279|2|1);INTRON(MODIFIER||||782|pb|protein_coding|CODING|FBtr0089276|3|1);INTRON(MODIFIER||||777|pb|protein_coding|CODING|FBtr0089278|2|1)]	-
FBtr0089276	3R_2538332_SNP	A	G	0.09202	15	148	6.05e-06	0.0928155	SiteClass[FBgn0051481|pb|INTRON|0],TranscriptAnnot[INTRON(MODIFIER||||777|pb|protein_coding|CODING|FBtr0089277|3|1);INTRON(MODIFIER||||772|pb|protein_coding|CODING|FBtr0089279|2|1);INTRON(MODIFIER||||782|pb|protein_coding|CODING|FBtr0089276|3|1);INTRON(MODIFIER||||777|pb|protein_coding|CODING|FBtr0089278|2|1)]	-
FBtr0089278	3R_2538332_SNP	A	G	0.09202	15	148	6.05e-06	0.0928155	SiteClass[FBgn0051481|pb|INTRON|0],TranscriptAnnot[INTRON(MODIFIER||||777|pb|protein_coding|CODING|FBtr0089277|3|1);INTRON(MODIFIER||||772|pb|protein_coding|CODING|FBtr0089279|2|1);INTRON(MODIFIER||||782|pb|protein_coding|CODING|FBtr0089276|3|1);INTRON(MODIFIER||||777|pb|protein_coding|CODING|FBtr0089278|2|1)]	-
FBgn0260642	3R_2744904_SNP	A	G	0.06358	11	162	6.05e-06	0.0928155	SiteClass[FBgn0260642|Antp|INTRON|0],TranscriptAnnot[INTRON(MODIFIER||||297|Antp|protein_coding|CODING|FBtr0081646|1|1);INTRON(MODIFIER||||374|Antp|protein_coding|CODING|FBtr0081648|1|1);INTRON(MODIFIER||||378|Antp|protein_coding|CODING|FBtr0081652|1|1);INTRON(MODIFIER||||365|Antp|protein_coding|CODING|FBtr0081653|1|1);INTRON(MODIFIER||||378|Antp|protein_coding|CODING|FBtr0081655|1|1);INTRON(MODI…	The gene Antennapedia is referred to in FlyBase by the symbol Dmel\Antp (CG1028, FBgn0260642). It is a protein_coding_gene from Drosophila melanogaster. It has 11 annotated transcripts and 11 polypeptides (5 unique). Gene sequence location is 3R:6896253..6999228. It has the cytological map location 84A6-84B2. Protein features are: Homeobox domain; Homeobox protein, antennapedia type; Homeobox pro…
FBtr0081646	3R_2744904_SNP	A	G	0.06358	11	162	6.05e-06	0.0928155	SiteClass[FBgn0260642|Antp|INTRON|0],TranscriptAnnot[INTRON(MODIFIER||||297|Antp|protein_coding|CODING|FBtr0081646|1|1);INTRON(MODIFIER||||374|Antp|protein_coding|CODING|FBtr0081648|1|1);INTRON(MODIFIER||||378|Antp|protein_coding|CODING|FBtr0081652|1|1);INTRON(MODIFIER||||365|Antp|protein_coding|CODING|FBtr0081653|1|1);INTRON(MODIFIER||||378|Antp|protein_coding|CODING|FBtr0081655|1|1);INTRON(MODI…	-
FBtr0081648	3R_2744904_SNP	A	G	0.06358	11	162	6.05e-06	0.0928155	SiteClass[FBgn0260642|Antp|INTRON|0],TranscriptAnnot[INTRON(MODIFIER||||297|Antp|protein_coding|CODING|FBtr0081646|1|1);INTRON(MODIFIER||||374|Antp|protein_coding|CODING|FBtr0081648|1|1);INTRON(MODIFIER||||378|Antp|protein_coding|CODING|FBtr0081652|1|1);INTRON(MODIFIER||||365|Antp|protein_coding|CODING|FBtr0081653|1|1);INTRON(MODIFIER||||378|Antp|protein_coding|CODING|FBtr0081655|1|1);INTRON(MODI…	-
FBtr0081652	3R_2744904_SNP	A	G	0.06358	11	162	6.05e-06	0.0928155	SiteClass[FBgn0260642|Antp|INTRON|0],TranscriptAnnot[INTRON(MODIFIER||||297|Antp|protein_coding|CODING|FBtr0081646|1|1);INTRON(MODIFIER||||374|Antp|protein_coding|CODING|FBtr0081648|1|1);INTRON(MODIFIER||||378|Antp|protein_coding|CODING|FBtr0081652|1|1);INTRON(MODIFIER||||365|Antp|protein_coding|CODING|FBtr0081653|1|1);INTRON(MODIFIER||||378|Antp|protein_coding|CODING|FBtr0081655|1|1);INTRON(MODI…	-
FBtr0081653	3R_2744904_SNP	A	G	0.06358	11	162	6.05e-06	0.0928155	SiteClass[FBgn0260642|Antp|INTRON|0],TranscriptAnnot[INTRON(MODIFIER||||297|Antp|protein_coding|CODING|FBtr0081646|1|1);INTRON(MODIFIER||||374|Antp|protein_coding|CODING|FBtr0081648|1|1);INTRON(MODIFIER||||378|Antp|protein_coding|CODING|FBtr0081652|1|1);INTRON(MODIFIER||||365|Antp|protein_coding|CODING|FBtr0081653|1|1);INTRON(MODIFIER||||378|Antp|protein_coding|CODING|FBtr0081655|1|1);INTRON(MODI…	-
FBtr0081655	3R_2744904_SNP	A	G	0.06358	11	162	6.05e-06	0.0928155	SiteClass[FBgn0260642|Antp|INTRON|0],TranscriptAnnot[INTRON(MODIFIER||||297|Antp|protein_coding|CODING|FBtr0081646|1|1);INTRON(MODIFIER||||374|Antp|protein_coding|CODING|FBtr0081648|1|1);INTRON(MODIFIER||||378|Antp|protein_coding|CODING|FBtr0081652|1|1);INTRON(MODIFIER||||365|Antp|protein_coding|CODING|FBtr0081653|1|1);INTRON(MODIFIER||||378|Antp|protein_coding|CODING|FBtr0081655|1|1);INTRON(MODI…	-
FBtr0081656	3R_2744904_SNP	A	G	0.06358	11	162	6.05e-06	0.0928155	SiteClass[FBgn0260642|Antp|INTRON|0],TranscriptAnnot[INTRON(MODIFIER||||297|Antp|protein_coding|CODING|FBtr0081646|1|1);INTRON(MODIFIER||||374|Antp|protein_coding|CODING|FBtr0081648|1|1);INTRON(MODIFIER||||378|Antp|protein_coding|CODING|FBtr0081652|1|1);INTRON(MODIFIER||||365|Antp|protein_coding|CODING|FBtr0081653|1|1);INTRON(MODIFIER||||378|Antp|protein_coding|CODING|FBtr0081655|1|1);INTRON(MODI…	-
FBtr0081647	3R_2744904_SNP	A	G	0.06358	11	162	6.05e-06	0.0928155	SiteClass[FBgn0260642|Antp|INTRON|0],TranscriptAnnot[INTRON(MODIFIER||||297|Antp|protein_coding|CODING|FBtr0081646|1|1);INTRON(MODIFIER||||374|Antp|protein_coding|CODING|FBtr0081648|1|1);INTRON(MODIFIER||||378|Antp|protein_coding|CODING|FBtr0081652|1|1);INTRON(MODIFIER||||365|Antp|protein_coding|CODING|FBtr0081653|1|1);INTRON(MODIFIER||||378|Antp|protein_coding|CODING|FBtr0081655|1|1);INTRON(MODI…	-
FBtr0081649	3R_2744904_SNP	A	G	0.06358	11	162	6.05e-06	0.0928155	SiteClass[FBgn0260642|Antp|INTRON|0],TranscriptAnnot[INTRON(MODIFIER||||297|Antp|protein_coding|CODING|FBtr0081646|1|1);INTRON(MODIFIER||||374|Antp|protein_coding|CODING|FBtr0081648|1|1);INTRON(MODIFIER||||378|Antp|protein_coding|CODING|FBtr0081652|1|1);INTRON(MODIFIER||||365|Antp|protein_coding|CODING|FBtr0081653|1|1);INTRON(MODIFIER||||378|Antp|protein_coding|CODING|FBtr0081655|1|1);INTRON(MODI…	-
FBtr0081650	3R_2744904_SNP	A	G	0.06358	11	162	6.05e-06	0.0928155	SiteClass[FBgn0260642|Antp|INTRON|0],TranscriptAnnot[INTRON(MODIFIER||||297|Antp|protein_coding|CODING|FBtr0081646|1|1);INTRON(MODIFIER||||374|Antp|protein_coding|CODING|FBtr0081648|1|1);INTRON(MODIFIER||||378|Antp|protein_coding|CODING|FBtr0081652|1|1);INTRON(MODIFIER||||365|Antp|protein_coding|CODING|FBtr0081653|1|1);INTRON(MODIFIER||||378|Antp|protein_coding|CODING|FBtr0081655|1|1);INTRON(MODI…	-
FBtr0081651	3R_2744904_SNP	A	G	0.06358	11	162	6.05e-06	0.0928155	SiteClass[FBgn0260642|Antp|INTRON|0],TranscriptAnnot[INTRON(MODIFIER||||297|Antp|protein_coding|CODING|FBtr0081646|1|1);INTRON(MODIFIER||||374|Antp|protein_coding|CODING|FBtr0081648|1|1);INTRON(MODIFIER||||378|Antp|protein_coding|CODING|FBtr0081652|1|1);INTRON(MODIFIER||||365|Antp|protein_coding|CODING|FBtr0081653|1|1);INTRON(MODIFIER||||378|Antp|protein_coding|CODING|FBtr0081655|1|1);INTRON(MODI…	-
FBtr0081654	3R_2744904_SNP	A	G	0.06358	11	162	6.05e-06	0.0928155	SiteClass[FBgn0260642|Antp|INTRON|0],TranscriptAnnot[INTRON(MODIFIER||||297|Antp|protein_coding|CODING|FBtr0081646|1|1);INTRON(MODIFIER||||374|Antp|protein_coding|CODING|FBtr0081648|1|1);INTRON(MODIFIER||||378|Antp|protein_coding|CODING|FBtr0081652|1|1);INTRON(MODIFIER||||365|Antp|protein_coding|CODING|FBtr0081653|1|1);INTRON(MODIFIER||||378|Antp|protein_coding|CODING|FBtr0081655|1|1);INTRON(MODI…	-
FBgn0261638	3R_2598989_SNP	A	G	0.05294	9	161	6.18e-06	0.0929653	SiteClass[FBgn0261638|CR42721|INTRON|0],TranscriptAnnot[INTRON(MODIFIER|||||CR42721|ncRNA|NON_CODING|FBtr0309069|1|1);INTRON(MODIFIER|||||CR42721|ncRNA|NON_CODING|FBtr0303008|1|1)]	This gene is referred to in FlyBase by the symbol Dmel\CR42721 (FBgn0261638). It is a non_protein_coding_gene from Drosophila melanogaster. It has 2 annotated transcripts. Gene sequence location is 3R:6767050..6779728. It has the cytological map location 84A5. Its molecular function is unknown. The biological processes in which it is involved are not known. One allele is reported. No phenotypic d…
FBtr0309069	3R_2598989_SNP	A	G	0.05294	9	161	6.18e-06	0.0929653	SiteClass[FBgn0261638|CR42721|INTRON|0],TranscriptAnnot[INTRON(MODIFIER|||||CR42721|ncRNA|NON_CODING|FBtr0309069|1|1);INTRON(MODIFIER|||||CR42721|ncRNA|NON_CODING|FBtr0303008|1|1)]	-
FBtr0303008	3R_2598989_SNP	A	G	0.05294	9	161	6.18e-06	0.0929653	SiteClass[FBgn0261638|CR42721|INTRON|0],TranscriptAnnot[INTRON(MODIFIER|||||CR42721|ncRNA|NON_CODING|FBtr0309069|1|1);INTRON(MODIFIER|||||CR42721|ncRNA|NON_CODING|FBtr0303008|1|1)]	-
FBgn0038492	3R_13020256_SNP	C	G	0.05814	10	162	6.22e-06	0.0929653	SiteClass[FBgn0038492|Mur89F|INTRON|0],TranscriptAnnot[INTRON(MODIFIER||||2159|Mur89F|protein_coding|CODING|FBtr0334402|1|1);INTRON(MODIFIER||||2158|Mur89F|protein_coding|CODING|FBtr0334403|1|1)]	The gene Mucin related 89F is referred to in FlyBase by the symbol Dmel\Mur89F (CG4090, FBgn0038492). It is a protein_coding_gene from Drosophila melanogaster. It has 2 annotated transcripts and 2 polypeptides (all unique). Gene sequence location is 3R:17152995..17202130. It has the cytological map location 89F1-89F3. Protein features are: Chitin binding domain. Its molecular function is describe…
FBtr0334402	3R_13020256_SNP	C	G	0.05814	10	162	6.22e-06	0.0929653	SiteClass[FBgn0038492|Mur89F|INTRON|0],TranscriptAnnot[INTRON(MODIFIER||||2159|Mur89F|protein_coding|CODING|FBtr0334402|1|1);INTRON(MODIFIER||||2158|Mur89F|protein_coding|CODING|FBtr0334403|1|1)]	-
FBtr0334403	3R_13020256_SNP	C	G	0.05814	10	162	6.22e-06	0.0929653	SiteClass[FBgn0038492|Mur89F|INTRON|0],TranscriptAnnot[INTRON(MODIFIER||||2159|Mur89F|protein_coding|CODING|FBtr0334402|1|1);INTRON(MODIFIER||||2158|Mur89F|protein_coding|CODING|FBtr0334403|1|1)]	-
FBgn0002781	3R_17199930_SNP	G	A	0.05085	9	168	6.24e-06	0.0929653	SiteClass[FBgn0002781|mod_mdg4_|INTRON|0],TranscriptAnnot[INTRON(MODIFIER||||499|mod_mdg4_|protein_coding|CODING|FBtr0343765|4|1);INTRON(MODIFIER||||475|mod_mdg4_|protein_coding|CODING|FBtr0084077|4|1);INTRON(MODIFIER||||485|mod_mdg4_|protein_coding|CODING|FBtr0084060|4|1);INTRON(MODIFIER||||536|mod_mdg4_|protein_coding|CODING|FBtr0084065|4|1);INTRON(MODIFIER||||520|mod_mdg4_|protein_coding|CODIN…	The gene modifier of mdg4 is referred to in FlyBase by the symbol Dmel\mod(mdg4) (CG32491, FBgn0002781). It is a protein_coding_gene from Drosophila melanogaster. It has 31 annotated transcripts and 31 polypeptides (all unique). Gene sequence location is 3R:21350846..21377401. It has the cytological map location 93D6-93D9. Protein features are: BTB/POZ domain; SKP1/BTB/POZ domain; Zinc finger, FL…
FBtr0343765	3R_17199930_SNP	G	A	0.05085	9	168	6.24e-06	0.0929653	SiteClass[FBgn0002781|mod_mdg4_|INTRON|0],TranscriptAnnot[INTRON(MODIFIER||||499|mod_mdg4_|protein_coding|CODING|FBtr0343765|4|1);INTRON(MODIFIER||||475|mod_mdg4_|protein_coding|CODING|FBtr0084077|4|1);INTRON(MODIFIER||||485|mod_mdg4_|protein_coding|CODING|FBtr0084060|4|1);INTRON(MODIFIER||||536|mod_mdg4_|protein_coding|CODING|FBtr0084065|4|1);INTRON(MODIFIER||||520|mod_mdg4_|protein_coding|CODIN…	-
FBtr0084077	3R_17199930_SNP	G	A	0.05085	9	168	6.24e-06	0.0929653	SiteClass[FBgn0002781|mod_mdg4_|INTRON|0],TranscriptAnnot[INTRON(MODIFIER||||499|mod_mdg4_|protein_coding|CODING|FBtr0343765|4|1);INTRON(MODIFIER||||475|mod_mdg4_|protein_coding|CODING|FBtr0084077|4|1);INTRON(MODIFIER||||485|mod_mdg4_|protein_coding|CODING|FBtr0084060|4|1);INTRON(MODIFIER||||536|mod_mdg4_|protein_coding|CODING|FBtr0084065|4|1);INTRON(MODIFIER||||520|mod_mdg4_|protein_coding|CODIN…	-
FBtr0084060	3R_17199930_SNP	G	A	0.05085	9	168	6.24e-06	0.0929653	SiteClass[FBgn0002781|mod_mdg4_|INTRON|0],TranscriptAnnot[INTRON(MODIFIER||||499|mod_mdg4_|protein_coding|CODING|FBtr0343765|4|1);INTRON(MODIFIER||||475|mod_mdg4_|protein_coding|CODING|FBtr0084077|4|1);INTRON(MODIFIER||||485|mod_mdg4_|protein_coding|CODING|FBtr0084060|4|1);INTRON(MODIFIER||||536|mod_mdg4_|protein_coding|CODING|FBtr0084065|4|1);INTRON(MODIFIER||||520|mod_mdg4_|protein_coding|CODIN…	-
FBtr0084065	3R_17199930_SNP	G	A	0.05085	9	168	6.24e-06	0.0929653	SiteClass[FBgn0002781|mod_mdg4_|INTRON|0],TranscriptAnnot[INTRON(MODIFIER||||499|mod_mdg4_|protein_coding|CODING|FBtr0343765|4|1);INTRON(MODIFIER||||475|mod_mdg4_|protein_coding|CODING|FBtr0084077|4|1);INTRON(MODIFIER||||485|mod_mdg4_|protein_coding|CODING|FBtr0084060|4|1);INTRON(MODIFIER||||536|mod_mdg4_|protein_coding|CODING|FBtr0084065|4|1);INTRON(MODIFIER||||520|mod_mdg4_|protein_coding|CODIN…	-
FBtr0084063	3R_17199930_SNP	G	A	0.05085	9	168	6.24e-06	0.0929653	SiteClass[FBgn0002781|mod_mdg4_|INTRON|0],TranscriptAnnot[INTRON(MODIFIER||||499|mod_mdg4_|protein_coding|CODING|FBtr0343765|4|1);INTRON(MODIFIER||||475|mod_mdg4_|protein_coding|CODING|FBtr0084077|4|1);INTRON(MODIFIER||||485|mod_mdg4_|protein_coding|CODING|FBtr0084060|4|1);INTRON(MODIFIER||||536|mod_mdg4_|protein_coding|CODING|FBtr0084065|4|1);INTRON(MODIFIER||||520|mod_mdg4_|protein_coding|CODIN…	-
FBtr0114361	3R_17199930_SNP	G	A	0.05085	9	168	6.24e-06	0.0929653	SiteClass[FBgn0002781|mod_mdg4_|INTRON|0],TranscriptAnnot[INTRON(MODIFIER||||499|mod_mdg4_|protein_coding|CODING|FBtr0343765|4|1);INTRON(MODIFIER||||475|mod_mdg4_|protein_coding|CODING|FBtr0084077|4|1);INTRON(MODIFIER||||485|mod_mdg4_|protein_coding|CODING|FBtr0084060|4|1);INTRON(MODIFIER||||536|mod_mdg4_|protein_coding|CODING|FBtr0084065|4|1);INTRON(MODIFIER||||520|mod_mdg4_|protein_coding|CODIN…	-
FBtr0084066	3R_17199930_SNP	G	A	0.05085	9	168	6.24e-06	0.0929653	SiteClass[FBgn0002781|mod_mdg4_|INTRON|0],TranscriptAnnot[INTRON(MODIFIER||||499|mod_mdg4_|protein_coding|CODING|FBtr0343765|4|1);INTRON(MODIFIER||||475|mod_mdg4_|protein_coding|CODING|FBtr0084077|4|1);INTRON(MODIFIER||||485|mod_mdg4_|protein_coding|CODING|FBtr0084060|4|1);INTRON(MODIFIER||||536|mod_mdg4_|protein_coding|CODING|FBtr0084065|4|1);INTRON(MODIFIER||||520|mod_mdg4_|protein_coding|CODIN…	-
FBtr0084067	3R_17199930_SNP	G	A	0.05085	9	168	6.24e-06	0.0929653	SiteClass[FBgn0002781|mod_mdg4_|INTRON|0],TranscriptAnnot[INTRON(MODIFIER||||499|mod_mdg4_|protein_coding|CODING|FBtr0343765|4|1);INTRON(MODIFIER||||475|mod_mdg4_|protein_coding|CODING|FBtr0084077|4|1);INTRON(MODIFIER||||485|mod_mdg4_|protein_coding|CODING|FBtr0084060|4|1);INTRON(MODIFIER||||536|mod_mdg4_|protein_coding|CODING|FBtr0084065|4|1);INTRON(MODIFIER||||520|mod_mdg4_|protein_coding|CODIN…	-
FBtr0084061	3R_17199930_SNP	G	A	0.05085	9	168	6.24e-06	0.0929653	SiteClass[FBgn0002781|mod_mdg4_|INTRON|0],TranscriptAnnot[INTRON(MODIFIER||||499|mod_mdg4_|protein_coding|CODING|FBtr0343765|4|1);INTRON(MODIFIER||||475|mod_mdg4_|protein_coding|CODING|FBtr0084077|4|1);INTRON(MODIFIER||||485|mod_mdg4_|protein_coding|CODING|FBtr0084060|4|1);INTRON(MODIFIER||||536|mod_mdg4_|protein_coding|CODING|FBtr0084065|4|1);INTRON(MODIFIER||||520|mod_mdg4_|protein_coding|CODIN…	-
FBtr0084068	3R_17199930_SNP	G	A	0.05085	9	168	6.24e-06	0.0929653	SiteClass[FBgn0002781|mod_mdg4_|INTRON|0],TranscriptAnnot[INTRON(MODIFIER||||499|mod_mdg4_|protein_coding|CODING|FBtr0343765|4|1);INTRON(MODIFIER||||475|mod_mdg4_|protein_coding|CODING|FBtr0084077|4|1);INTRON(MODIFIER||||485|mod_mdg4_|protein_coding|CODING|FBtr0084060|4|1);INTRON(MODIFIER||||536|mod_mdg4_|protein_coding|CODING|FBtr0084065|4|1);INTRON(MODIFIER||||520|mod_mdg4_|protein_coding|CODIN…	-
FBtr0084069	3R_17199930_SNP	G	A	0.05085	9	168	6.24e-06	0.0929653	SiteClass[FBgn0002781|mod_mdg4_|INTRON|0],TranscriptAnnot[INTRON(MODIFIER||||499|mod_mdg4_|protein_coding|CODING|FBtr0343765|4|1);INTRON(MODIFIER||||475|mod_mdg4_|protein_coding|CODING|FBtr0084077|4|1);INTRON(MODIFIER||||485|mod_mdg4_|protein_coding|CODING|FBtr0084060|4|1);INTRON(MODIFIER||||536|mod_mdg4_|protein_coding|CODING|FBtr0084065|4|1);INTRON(MODIFIER||||520|mod_mdg4_|protein_coding|CODIN…	-
FBtr0084075	3R_17199930_SNP	G	A	0.05085	9	168	6.24e-06	0.0929653	SiteClass[FBgn0002781|mod_mdg4_|INTRON|0],TranscriptAnnot[INTRON(MODIFIER||||499|mod_mdg4_|protein_coding|CODING|FBtr0343765|4|1);INTRON(MODIFIER||||475|mod_mdg4_|protein_coding|CODING|FBtr0084077|4|1);INTRON(MODIFIER||||485|mod_mdg4_|protein_coding|CODING|FBtr0084060|4|1);INTRON(MODIFIER||||536|mod_mdg4_|protein_coding|CODING|FBtr0084065|4|1);INTRON(MODIFIER||||520|mod_mdg4_|protein_coding|CODIN…	-
FBtr0084071	3R_17199930_SNP	G	A	0.05085	9	168	6.24e-06	0.0929653	SiteClass[FBgn0002781|mod_mdg4_|INTRON|0],TranscriptAnnot[INTRON(MODIFIER||||499|mod_mdg4_|protein_coding|CODING|FBtr0343765|4|1);INTRON(MODIFIER||||475|mod_mdg4_|protein_coding|CODING|FBtr0084077|4|1);INTRON(MODIFIER||||485|mod_mdg4_|protein_coding|CODING|FBtr0084060|4|1);INTRON(MODIFIER||||536|mod_mdg4_|protein_coding|CODING|FBtr0084065|4|1);INTRON(MODIFIER||||520|mod_mdg4_|protein_coding|CODIN…	-
FBtr0084070	3R_17199930_SNP	G	A	0.05085	9	168	6.24e-06	0.0929653	SiteClass[FBgn0002781|mod_mdg4_|INTRON|0],TranscriptAnnot[INTRON(MODIFIER||||499|mod_mdg4_|protein_coding|CODING|FBtr0343765|4|1);INTRON(MODIFIER||||475|mod_mdg4_|protein_coding|CODING|FBtr0084077|4|1);INTRON(MODIFIER||||485|mod_mdg4_|protein_coding|CODING|FBtr0084060|4|1);INTRON(MODIFIER||||536|mod_mdg4_|protein_coding|CODING|FBtr0084065|4|1);INTRON(MODIFIER||||520|mod_mdg4_|protein_coding|CODIN…	-
FBtr0084072	3R_17199930_SNP	G	A	0.05085	9	168	6.24e-06	0.0929653	SiteClass[FBgn0002781|mod_mdg4_|INTRON|0],TranscriptAnnot[INTRON(MODIFIER||||499|mod_mdg4_|protein_coding|CODING|FBtr0343765|4|1);INTRON(MODIFIER||||475|mod_mdg4_|protein_coding|CODING|FBtr0084077|4|1);INTRON(MODIFIER||||485|mod_mdg4_|protein_coding|CODING|FBtr0084060|4|1);INTRON(MODIFIER||||536|mod_mdg4_|protein_coding|CODING|FBtr0084065|4|1);INTRON(MODIFIER||||520|mod_mdg4_|protein_coding|CODIN…	-
FBtr0084064	3R_17199930_SNP	G	A	0.05085	9	168	6.24e-06	0.0929653	SiteClass[FBgn0002781|mod_mdg4_|INTRON|0],TranscriptAnnot[INTRON(MODIFIER||||499|mod_mdg4_|protein_coding|CODING|FBtr0343765|4|1);INTRON(MODIFIER||||475|mod_mdg4_|protein_coding|CODING|FBtr0084077|4|1);INTRON(MODIFIER||||485|mod_mdg4_|protein_coding|CODING|FBtr0084060|4|1);INTRON(MODIFIER||||536|mod_mdg4_|protein_coding|CODING|FBtr0084065|4|1);INTRON(MODIFIER||||520|mod_mdg4_|protein_coding|CODIN…	-
FBtr0114360	3R_17199930_SNP	G	A	0.05085	9	168	6.24e-06	0.0929653	SiteClass[FBgn0002781|mod_mdg4_|INTRON|0],TranscriptAnnot[INTRON(MODIFIER||||499|mod_mdg4_|protein_coding|CODING|FBtr0343765|4|1);INTRON(MODIFIER||||475|mod_mdg4_|protein_coding|CODING|FBtr0084077|4|1);INTRON(MODIFIER||||485|mod_mdg4_|protein_coding|CODING|FBtr0084060|4|1);INTRON(MODIFIER||||536|mod_mdg4_|protein_coding|CODING|FBtr0084065|4|1);INTRON(MODIFIER||||520|mod_mdg4_|protein_coding|CODIN…	-
FBtr0084062	3R_17199930_SNP	G	A	0.05085	9	168	6.24e-06	0.0929653	SiteClass[FBgn0002781|mod_mdg4_|INTRON|0],TranscriptAnnot[INTRON(MODIFIER||||499|mod_mdg4_|protein_coding|CODING|FBtr0343765|4|1);INTRON(MODIFIER||||475|mod_mdg4_|protein_coding|CODING|FBtr0084077|4|1);INTRON(MODIFIER||||485|mod_mdg4_|protein_coding|CODING|FBtr0084060|4|1);INTRON(MODIFIER||||536|mod_mdg4_|protein_coding|CODING|FBtr0084065|4|1);INTRON(MODIFIER||||520|mod_mdg4_|protein_coding|CODIN…	-
FBtr0084078	3R_17199930_SNP	G	A	0.05085	9	168	6.24e-06	0.0929653	SiteClass[FBgn0002781|mod_mdg4_|INTRON|0],TranscriptAnnot[INTRON(MODIFIER||||499|mod_mdg4_|protein_coding|CODING|FBtr0343765|4|1);INTRON(MODIFIER||||475|mod_mdg4_|protein_coding|CODING|FBtr0084077|4|1);INTRON(MODIFIER||||485|mod_mdg4_|protein_coding|CODING|FBtr0084060|4|1);INTRON(MODIFIER||||536|mod_mdg4_|protein_coding|CODING|FBtr0084065|4|1);INTRON(MODIFIER||||520|mod_mdg4_|protein_coding|CODIN…	-
FBtr0114359	3R_17199930_SNP	G	A	0.05085	9	168	6.24e-06	0.0929653	SiteClass[FBgn0002781|mod_mdg4_|INTRON|0],TranscriptAnnot[INTRON(MODIFIER||||499|mod_mdg4_|protein_coding|CODING|FBtr0343765|4|1);INTRON(MODIFIER||||475|mod_mdg4_|protein_coding|CODING|FBtr0084077|4|1);INTRON(MODIFIER||||485|mod_mdg4_|protein_coding|CODING|FBtr0084060|4|1);INTRON(MODIFIER||||536|mod_mdg4_|protein_coding|CODING|FBtr0084065|4|1);INTRON(MODIFIER||||520|mod_mdg4_|protein_coding|CODIN…	-
FBtr0084074	3R_17199930_SNP	G	A	0.05085	9	168	6.24e-06	0.0929653	SiteClass[FBgn0002781|mod_mdg4_|INTRON|0],TranscriptAnnot[INTRON(MODIFIER||||499|mod_mdg4_|protein_coding|CODING|FBtr0343765|4|1);INTRON(MODIFIER||||475|mod_mdg4_|protein_coding|CODING|FBtr0084077|4|1);INTRON(MODIFIER||||485|mod_mdg4_|protein_coding|CODING|FBtr0084060|4|1);INTRON(MODIFIER||||536|mod_mdg4_|protein_coding|CODING|FBtr0084065|4|1);INTRON(MODIFIER||||520|mod_mdg4_|protein_coding|CODIN…	-
FBtr0084073	3R_17199930_SNP	G	A	0.05085	9	168	6.24e-06	0.0929653	SiteClass[FBgn0002781|mod_mdg4_|INTRON|0],TranscriptAnnot[INTRON(MODIFIER||||499|mod_mdg4_|protein_coding|CODING|FBtr0343765|4|1);INTRON(MODIFIER||||475|mod_mdg4_|protein_coding|CODING|FBtr0084077|4|1);INTRON(MODIFIER||||485|mod_mdg4_|protein_coding|CODING|FBtr0084060|4|1);INTRON(MODIFIER||||536|mod_mdg4_|protein_coding|CODING|FBtr0084065|4|1);INTRON(MODIFIER||||520|mod_mdg4_|protein_coding|CODIN…	-
FBgn0033702	2R_8115906_INS	G	GTAT	0.2706	46	124	6.27e-06	0.0929653	SiteClass[FBgn0033702|CG8854|INTRON|0],TranscriptAnnot[INTRON(MODIFIER||||392|CG8854|protein_coding|CODING|FBtr0331944|1|1)]	This gene is referred to in FlyBase by the symbol Dmel\CG8854 (FBgn0033702). It is a protein_coding_gene from Drosophila melanogaster. It has 2 annotated transcripts and 2 polypeptides (1 unique). Gene sequence location is 2R:12224461..12229310. It has the cytological map location 48E10. Its molecular function is described by: . It is involved in the biological process described with: . One allel…
FBtr0331944	2R_8115906_INS	G	GTAT	0.2706	46	124	6.27e-06	0.0929653	SiteClass[FBgn0033702|CG8854|INTRON|0],TranscriptAnnot[INTRON(MODIFIER||||392|CG8854|protein_coding|CODING|FBtr0331944|1|1)]	-
FBgn0264748	3L_18061344_INS	ATG	A	0.07558	13	159	6.32e-06	0.0929653	SiteClass[FBgn0264748|CG44006|DOWNSTREAM|483],TranscriptAnnot[DOWNSTREAM(MODIFIER||483||374|CG44006|protein_coding|CODING|FBtr0334132||1);INTERGENIC(MODIFIER||||||||||1)]	This gene is referred to in FlyBase by the symbol Dmel\CG44006 (FBgn0264748). It is a protein_coding_gene from Drosophila melanogaster. It has one annotated transcript and one polypeptide. Gene sequence location is 3L:18068728..18070150. It has the cytological map location 75B6. Protein features are: Leucine-rich repeat domain, L domain-like. Its molecular function is unknown. The biological proc…
FBtr0334132	3L_18061344_INS	ATG	A	0.07558	13	159	6.32e-06	0.0929653	SiteClass[FBgn0264748|CG44006|DOWNSTREAM|483],TranscriptAnnot[DOWNSTREAM(MODIFIER||483||374|CG44006|protein_coding|CODING|FBtr0334132||1);INTERGENIC(MODIFIER||||||||||1)]	-
FBgn0038819	3R_16498756_SNP	T	G	0.07059	12	158	6.36e-06	0.0929653	SiteClass[FBgn0038819|Cpr92F|DOWNSTREAM|213],TranscriptAnnot[DOWNSTREAM(MODIFIER||213||381|Cpr92F|protein_coding|CODING|FBtr0083919||1);INTERGENIC(MODIFIER||||||||||1)]	The gene Cuticular protein 92F is referred to in FlyBase by the symbol Dmel\Cpr92F (CG5494, FBgn0038819). It is a protein_coding_gene from Drosophila melanogaster. It has one annotated transcript and one polypeptide. Gene sequence location is 3R:20669571..20672821. It has the cytological map location 92F5-92F6. Protein features are: Insect cuticle protein. Its molecular function is described by: …
FBtr0083919	3R_16498756_SNP	T	G	0.07059	12	158	6.36e-06	0.0929653	SiteClass[FBgn0038819|Cpr92F|DOWNSTREAM|213],TranscriptAnnot[DOWNSTREAM(MODIFIER||213||381|Cpr92F|protein_coding|CODING|FBtr0083919||1);INTERGENIC(MODIFIER||||||||||1)]	-
FBgn0001404	X_2490169_SNP	C	T	0.3409	60	116	6.73e-06	0.0947379	SiteClass[FBgn0001404|egh|UTR_5_PRIME|0],TranscriptAnnot[UTR_5_PRIME(MODIFIER||79||457|egh|protein_coding|CODING|FBtr0070439|2|1);UTR_5_PRIME(MODIFIER||79||457|egh|protein_coding|CODING|FBtr0340091|2|1);UTR_5_PRIME(MODIFIER||79||457|egh|protein_coding|CODING|FBtr0070440|2|1)]	The gene egghead is referred to in FlyBase by the symbol Dmel\egh (CG9659, FBgn0001404). It is a protein_coding_gene from Drosophila melanogaster. It has 3 annotated transcripts and 3 polypeptides (1 unique). Gene sequence location is X:2588503..2599111. It has the cytological map location 3A6. Protein features are: Beta-1,4-mannosyltransferase Bre-3/Egh; Glycosyltransferase 2-like; Nucleotide-di…
FBtr0070439	X_2490169_SNP	C	T	0.3409	60	116	6.73e-06	0.0947379	SiteClass[FBgn0001404|egh|UTR_5_PRIME|0],TranscriptAnnot[UTR_5_PRIME(MODIFIER||79||457|egh|protein_coding|CODING|FBtr0070439|2|1);UTR_5_PRIME(MODIFIER||79||457|egh|protein_coding|CODING|FBtr0340091|2|1);UTR_5_PRIME(MODIFIER||79||457|egh|protein_coding|CODING|FBtr0070440|2|1)]	-
FBtr0340091	X_2490169_SNP	C	T	0.3409	60	116	6.73e-06	0.0947379	SiteClass[FBgn0001404|egh|UTR_5_PRIME|0],TranscriptAnnot[UTR_5_PRIME(MODIFIER||79||457|egh|protein_coding|CODING|FBtr0070439|2|1);UTR_5_PRIME(MODIFIER||79||457|egh|protein_coding|CODING|FBtr0340091|2|1);UTR_5_PRIME(MODIFIER||79||457|egh|protein_coding|CODING|FBtr0070440|2|1)]	-
FBtr0070440	X_2490169_SNP	C	T	0.3409	60	116	6.73e-06	0.0947379	SiteClass[FBgn0001404|egh|UTR_5_PRIME|0],TranscriptAnnot[UTR_5_PRIME(MODIFIER||79||457|egh|protein_coding|CODING|FBtr0070439|2|1);UTR_5_PRIME(MODIFIER||79||457|egh|protein_coding|CODING|FBtr0340091|2|1);UTR_5_PRIME(MODIFIER||79||457|egh|protein_coding|CODING|FBtr0070440|2|1)]	-
FBgn0001404	X_2489705_DEL	T	TT	0.1806	28	127	6.74e-06	0.0947379	SiteClass[FBgn0001404|egh|INTRON|0],TranscriptAnnot[INTRON(MODIFIER||||457|egh|protein_coding|CODING|FBtr0070439|1|1);INTRON(MODIFIER||||457|egh|protein_coding|CODING|FBtr0070440|1|1);INTRON(MODIFIER||||457|egh|protein_coding|CODING|FBtr0340091|1|1)]	The gene egghead is referred to in FlyBase by the symbol Dmel\egh (CG9659, FBgn0001404). It is a protein_coding_gene from Drosophila melanogaster. It has 3 annotated transcripts and 3 polypeptides (1 unique). Gene sequence location is X:2588503..2599111. It has the cytological map location 3A6. Protein features are: Beta-1,4-mannosyltransferase Bre-3/Egh; Glycosyltransferase 2-like; Nucleotide-di…
FBtr0070439	X_2489705_DEL	T	TT	0.1806	28	127	6.74e-06	0.0947379	SiteClass[FBgn0001404|egh|INTRON|0],TranscriptAnnot[INTRON(MODIFIER||||457|egh|protein_coding|CODING|FBtr0070439|1|1);INTRON(MODIFIER||||457|egh|protein_coding|CODING|FBtr0070440|1|1);INTRON(MODIFIER||||457|egh|protein_coding|CODING|FBtr0340091|1|1)]	-
FBtr0070440	X_2489705_DEL	T	TT	0.1806	28	127	6.74e-06	0.0947379	SiteClass[FBgn0001404|egh|INTRON|0],TranscriptAnnot[INTRON(MODIFIER||||457|egh|protein_coding|CODING|FBtr0070439|1|1);INTRON(MODIFIER||||457|egh|protein_coding|CODING|FBtr0070440|1|1);INTRON(MODIFIER||||457|egh|protein_coding|CODING|FBtr0340091|1|1)]	-
FBtr0340091	X_2489705_DEL	T	TT	0.1806	28	127	6.74e-06	0.0947379	SiteClass[FBgn0001404|egh|INTRON|0],TranscriptAnnot[INTRON(MODIFIER||||457|egh|protein_coding|CODING|FBtr0070439|1|1);INTRON(MODIFIER||||457|egh|protein_coding|CODING|FBtr0070440|1|1);INTRON(MODIFIER||||457|egh|protein_coding|CODING|FBtr0340091|1|1)]	-
FBgn0263219	3L_8262377_SNP	G	C	0.3559	63	114	6.85e-06	0.0947379	SiteClass[FBgn0263219|Dscam4|INTRON|0],TranscriptAnnot[INTRON(MODIFIER||||1918|Dscam4|protein_coding|CODING|FBtr0299839|13|1);INTRON(MODIFIER||||1918|Dscam4|protein_coding|CODING|FBtr0299840|13|1);INTRON(MODIFIER||||1874|Dscam4|protein_coding|CODING|FBtr0299841|13|1);INTRON(MODIFIER||||1935|Dscam4|protein_coding|CODING|FBtr0333589|13|1);INTRON(MODIFIER||||1935|Dscam4|protein_coding|CODING|FBtr033…	The gene Down syndrome cell adhesion molecule 4 is referred to in FlyBase by the symbol Dmel\Dscam4 (CG42330, FBgn0263219). It is a protein_coding_gene from Drosophila melanogaster. It has 5 annotated transcripts and 5 polypeptides (3 unique). Gene sequence location is 3L:8238647..8282398. It has the cytological map location 66C1-66C2. Protein features are: Fibronectin type III; Immunoglobulin I-…
FBtr0299839	3L_8262377_SNP	G	C	0.3559	63	114	6.85e-06	0.0947379	SiteClass[FBgn0263219|Dscam4|INTRON|0],TranscriptAnnot[INTRON(MODIFIER||||1918|Dscam4|protein_coding|CODING|FBtr0299839|13|1);INTRON(MODIFIER||||1918|Dscam4|protein_coding|CODING|FBtr0299840|13|1);INTRON(MODIFIER||||1874|Dscam4|protein_coding|CODING|FBtr0299841|13|1);INTRON(MODIFIER||||1935|Dscam4|protein_coding|CODING|FBtr0333589|13|1);INTRON(MODIFIER||||1935|Dscam4|protein_coding|CODING|FBtr033…	-
FBtr0299840	3L_8262377_SNP	G	C	0.3559	63	114	6.85e-06	0.0947379	SiteClass[FBgn0263219|Dscam4|INTRON|0],TranscriptAnnot[INTRON(MODIFIER||||1918|Dscam4|protein_coding|CODING|FBtr0299839|13|1);INTRON(MODIFIER||||1918|Dscam4|protein_coding|CODING|FBtr0299840|13|1);INTRON(MODIFIER||||1874|Dscam4|protein_coding|CODING|FBtr0299841|13|1);INTRON(MODIFIER||||1935|Dscam4|protein_coding|CODING|FBtr0333589|13|1);INTRON(MODIFIER||||1935|Dscam4|protein_coding|CODING|FBtr033…	-
FBtr0299841	3L_8262377_SNP	G	C	0.3559	63	114	6.85e-06	0.0947379	SiteClass[FBgn0263219|Dscam4|INTRON|0],TranscriptAnnot[INTRON(MODIFIER||||1918|Dscam4|protein_coding|CODING|FBtr0299839|13|1);INTRON(MODIFIER||||1918|Dscam4|protein_coding|CODING|FBtr0299840|13|1);INTRON(MODIFIER||||1874|Dscam4|protein_coding|CODING|FBtr0299841|13|1);INTRON(MODIFIER||||1935|Dscam4|protein_coding|CODING|FBtr0333589|13|1);INTRON(MODIFIER||||1935|Dscam4|protein_coding|CODING|FBtr033…	-
FBtr0333589	3L_8262377_SNP	G	C	0.3559	63	114	6.85e-06	0.0947379	SiteClass[FBgn0263219|Dscam4|INTRON|0],TranscriptAnnot[INTRON(MODIFIER||||1918|Dscam4|protein_coding|CODING|FBtr0299839|13|1);INTRON(MODIFIER||||1918|Dscam4|protein_coding|CODING|FBtr0299840|13|1);INTRON(MODIFIER||||1874|Dscam4|protein_coding|CODING|FBtr0299841|13|1);INTRON(MODIFIER||||1935|Dscam4|protein_coding|CODING|FBtr0333589|13|1);INTRON(MODIFIER||||1935|Dscam4|protein_coding|CODING|FBtr033…	-
FBtr0333590	3L_8262377_SNP	G	C	0.3559	63	114	6.85e-06	0.0947379	SiteClass[FBgn0263219|Dscam4|INTRON|0],TranscriptAnnot[INTRON(MODIFIER||||1918|Dscam4|protein_coding|CODING|FBtr0299839|13|1);INTRON(MODIFIER||||1918|Dscam4|protein_coding|CODING|FBtr0299840|13|1);INTRON(MODIFIER||||1874|Dscam4|protein_coding|CODING|FBtr0299841|13|1);INTRON(MODIFIER||||1935|Dscam4|protein_coding|CODING|FBtr0333589|13|1);INTRON(MODIFIER||||1935|Dscam4|protein_coding|CODING|FBtr033…	-
FBgn0023097	3R_16427784_INS	AG	A	0.05587	10	169	6.9e-06	0.0947379	SiteClass[FBgn0023097|bon|INTRON|0],TranscriptAnnot[INTRON(MODIFIER||||1133|bon|protein_coding|CODING|FBtr0083912|1|1);INTRON(MODIFIER||||1125|bon|protein_coding|CODING|FBtr0300617|1|1);INTRON(MODIFIER||||1207|bon|protein_coding|CODING|FBtr0330043|1|1);INTRON(MODIFIER||||1119|bon|protein_coding|CODING|FBtr0334637|1|1);INTRON(MODIFIER||||1125|bon|protein_coding|CODING|FBtr0334638|1|1);INTRON(MODIF…	The gene bonus is referred to in FlyBase by the symbol Dmel\bon (CG5206, FBgn0023097). It is a protein_coding_gene from Drosophila melanogaster. It has 6 annotated transcripts and 6 polypeptides (all unique). Gene sequence location is 3R:20593139..20612540. It has the cytological map location 92F2-92F3. Protein features are: B-box, C-terminal; B-box-type zinc finger; Bromodomain; Zinc finger, FYV…
FBtr0083912	3R_16427784_INS	AG	A	0.05587	10	169	6.9e-06	0.0947379	SiteClass[FBgn0023097|bon|INTRON|0],TranscriptAnnot[INTRON(MODIFIER||||1133|bon|protein_coding|CODING|FBtr0083912|1|1);INTRON(MODIFIER||||1125|bon|protein_coding|CODING|FBtr0300617|1|1);INTRON(MODIFIER||||1207|bon|protein_coding|CODING|FBtr0330043|1|1);INTRON(MODIFIER||||1119|bon|protein_coding|CODING|FBtr0334637|1|1);INTRON(MODIFIER||||1125|bon|protein_coding|CODING|FBtr0334638|1|1);INTRON(MODIF…	-
FBtr0300617	3R_16427784_INS	AG	A	0.05587	10	169	6.9e-06	0.0947379	SiteClass[FBgn0023097|bon|INTRON|0],TranscriptAnnot[INTRON(MODIFIER||||1133|bon|protein_coding|CODING|FBtr0083912|1|1);INTRON(MODIFIER||||1125|bon|protein_coding|CODING|FBtr0300617|1|1);INTRON(MODIFIER||||1207|bon|protein_coding|CODING|FBtr0330043|1|1);INTRON(MODIFIER||||1119|bon|protein_coding|CODING|FBtr0334637|1|1);INTRON(MODIFIER||||1125|bon|protein_coding|CODING|FBtr0334638|1|1);INTRON(MODIF…	-
FBtr0330043	3R_16427784_INS	AG	A	0.05587	10	169	6.9e-06	0.0947379	SiteClass[FBgn0023097|bon|INTRON|0],TranscriptAnnot[INTRON(MODIFIER||||1133|bon|protein_coding|CODING|FBtr0083912|1|1);INTRON(MODIFIER||||1125|bon|protein_coding|CODING|FBtr0300617|1|1);INTRON(MODIFIER||||1207|bon|protein_coding|CODING|FBtr0330043|1|1);INTRON(MODIFIER||||1119|bon|protein_coding|CODING|FBtr0334637|1|1);INTRON(MODIFIER||||1125|bon|protein_coding|CODING|FBtr0334638|1|1);INTRON(MODIF…	-
FBtr0334637	3R_16427784_INS	AG	A	0.05587	10	169	6.9e-06	0.0947379	SiteClass[FBgn0023097|bon|INTRON|0],TranscriptAnnot[INTRON(MODIFIER||||1133|bon|protein_coding|CODING|FBtr0083912|1|1);INTRON(MODIFIER||||1125|bon|protein_coding|CODING|FBtr0300617|1|1);INTRON(MODIFIER||||1207|bon|protein_coding|CODING|FBtr0330043|1|1);INTRON(MODIFIER||||1119|bon|protein_coding|CODING|FBtr0334637|1|1);INTRON(MODIFIER||||1125|bon|protein_coding|CODING|FBtr0334638|1|1);INTRON(MODIF…	-
FBtr0334638	3R_16427784_INS	AG	A	0.05587	10	169	6.9e-06	0.0947379	SiteClass[FBgn0023097|bon|INTRON|0],TranscriptAnnot[INTRON(MODIFIER||||1133|bon|protein_coding|CODING|FBtr0083912|1|1);INTRON(MODIFIER||||1125|bon|protein_coding|CODING|FBtr0300617|1|1);INTRON(MODIFIER||||1207|bon|protein_coding|CODING|FBtr0330043|1|1);INTRON(MODIFIER||||1119|bon|protein_coding|CODING|FBtr0334637|1|1);INTRON(MODIFIER||||1125|bon|protein_coding|CODING|FBtr0334638|1|1);INTRON(MODIF…	-
FBtr0334639	3R_16427784_INS	AG	A	0.05587	10	169	6.9e-06	0.0947379	SiteClass[FBgn0023097|bon|INTRON|0],TranscriptAnnot[INTRON(MODIFIER||||1133|bon|protein_coding|CODING|FBtr0083912|1|1);INTRON(MODIFIER||||1125|bon|protein_coding|CODING|FBtr0300617|1|1);INTRON(MODIFIER||||1207|bon|protein_coding|CODING|FBtr0330043|1|1);INTRON(MODIFIER||||1119|bon|protein_coding|CODING|FBtr0334637|1|1);INTRON(MODIFIER||||1125|bon|protein_coding|CODING|FBtr0334638|1|1);INTRON(MODIF…	-
FBgn0003339	3R_2672660_SNP	T	G	0.05988	10	157	7.12e-06	0.0947379	SiteClass[FBgn0003339|Scr|INTRON|0],TranscriptAnnot[INTRON(MODIFIER||||417|Scr|protein_coding|CODING|FBtr0081657|1|1);INTRON(MODIFIER||||417|Scr|protein_coding|CODING|FBtr0081658|1|1)]	The gene Sex combs reduced is referred to in FlyBase by the symbol Dmel\Scr (CG1030, FBgn0003339). It is a protein_coding_gene from Drosophila melanogaster. It has 2 annotated transcripts and 2 polypeptides (1 unique). Gene sequence location is 3R:6823120..6849981. It has the cytological map location 84A5. Protein features are: Homeobox domain; Homeobox protein, antennapedia type; Homeobox protei…
FBtr0081657	3R_2672660_SNP	T	G	0.05988	10	157	7.12e-06	0.0947379	SiteClass[FBgn0003339|Scr|INTRON|0],TranscriptAnnot[INTRON(MODIFIER||||417|Scr|protein_coding|CODING|FBtr0081657|1|1);INTRON(MODIFIER||||417|Scr|protein_coding|CODING|FBtr0081658|1|1)]	-
FBtr0081658	3R_2672660_SNP	T	G	0.05988	10	157	7.12e-06	0.0947379	SiteClass[FBgn0003339|Scr|INTRON|0],TranscriptAnnot[INTRON(MODIFIER||||417|Scr|protein_coding|CODING|FBtr0081657|1|1);INTRON(MODIFIER||||417|Scr|protein_coding|CODING|FBtr0081658|1|1)]	-
FBgn0038741	3R_15702325_SNP	G	C	0.06897	12	162	7.23e-06	0.0947379	SiteClass[FBgn0038741|CG17186|SYNONYMOUS_CODING|0;FBgn0038740|CG4562|UPSTREAM|925],TranscriptAnnot[SYNONYMOUS_CODING(LOW|SILENT|cgG/cgC|R252|381|CG17186|protein_coding|CODING|FBtr0083858|2|1);UPSTREAM(MODIFIER||925||1362|CG4562|protein_coding|CODING|FBtr0330034||1);UPSTREAM(MODIFIER||925||948|CG4562|protein_coding|CODING|FBtr0330035||1)]	This gene is referred to in FlyBase by the symbol Dmel\CG17186 (FBgn0038741). It is a protein_coding_gene from Drosophila melanogaster. It has one annotated transcript and one polypeptide. Gene sequence location is 3R:19875974..19877514. It has the cytological map location 92B4. Protein features are: Zinc finger, C2H2-like. Its molecular function is unknown. The biological processes in which it i…
FBgn0038740	3R_15702325_SNP	G	C	0.06897	12	162	7.23e-06	0.0947379	SiteClass[FBgn0038741|CG17186|SYNONYMOUS_CODING|0;FBgn0038740|CG4562|UPSTREAM|925],TranscriptAnnot[SYNONYMOUS_CODING(LOW|SILENT|cgG/cgC|R252|381|CG17186|protein_coding|CODING|FBtr0083858|2|1);UPSTREAM(MODIFIER||925||1362|CG4562|protein_coding|CODING|FBtr0330034||1);UPSTREAM(MODIFIER||925||948|CG4562|protein_coding|CODING|FBtr0330035||1)]	This gene is referred to in FlyBase by the symbol Dmel\CG4562 (FBgn0038740). It is a protein_coding_gene from Drosophila melanogaster. It has 5 annotated transcripts and 5 polypeptides (3 unique). Gene sequence location is 3R:19865417..19875678. It has the cytological map location 92B4. Protein features are: AAA+ ATPase domain; ABC transporter type 1, transmembrane domain; ABC transporter, conser…
FBtr0083858	3R_15702325_SNP	G	C	0.06897	12	162	7.23e-06	0.0947379	SiteClass[FBgn0038741|CG17186|SYNONYMOUS_CODING|0;FBgn0038740|CG4562|UPSTREAM|925],TranscriptAnnot[SYNONYMOUS_CODING(LOW|SILENT|cgG/cgC|R252|381|CG17186|protein_coding|CODING|FBtr0083858|2|1);UPSTREAM(MODIFIER||925||1362|CG4562|protein_coding|CODING|FBtr0330034||1);UPSTREAM(MODIFIER||925||948|CG4562|protein_coding|CODING|FBtr0330035||1)]	-
FBtr0330034	3R_15702325_SNP	G	C	0.06897	12	162	7.23e-06	0.0947379	SiteClass[FBgn0038741|CG17186|SYNONYMOUS_CODING|0;FBgn0038740|CG4562|UPSTREAM|925],TranscriptAnnot[SYNONYMOUS_CODING(LOW|SILENT|cgG/cgC|R252|381|CG17186|protein_coding|CODING|FBtr0083858|2|1);UPSTREAM(MODIFIER||925||1362|CG4562|protein_coding|CODING|FBtr0330034||1);UPSTREAM(MODIFIER||925||948|CG4562|protein_coding|CODING|FBtr0330035||1)]	-
FBtr0330035	3R_15702325_SNP	G	C	0.06897	12	162	7.23e-06	0.0947379	SiteClass[FBgn0038741|CG17186|SYNONYMOUS_CODING|0;FBgn0038740|CG4562|UPSTREAM|925],TranscriptAnnot[SYNONYMOUS_CODING(LOW|SILENT|cgG/cgC|R252|381|CG17186|protein_coding|CODING|FBtr0083858|2|1);UPSTREAM(MODIFIER||925||1362|CG4562|protein_coding|CODING|FBtr0330034||1);UPSTREAM(MODIFIER||925||948|CG4562|protein_coding|CODING|FBtr0330035||1)]	-
FBgn0036777	3L_18109125_DEL	G	GT	0.1479	25	144	7.25e-06	0.0947379	SiteClass[FBgn0036777|CG7341|INTRON|0;FBgn0052195|CG32195|DOWNSTREAM|51],TranscriptAnnot[UTR_3_PRIME(MODIFIER||266||401|CG32195|protein_coding|CODING|FBtr0075125|4|1);DOWNSTREAM(MODIFIER||51||401|CG32195|protein_coding|CODING|FBtr0333696||1);DOWNSTREAM(MODIFIER||51||401|CG32195|protein_coding|CODING|FBtr0333697||1);INTRON(MODIFIER||||357|CG7341|protein_coding|CODING|FBtr0075124|1|1);INTRON(MODIFI…	This gene is referred to in FlyBase by the symbol Dmel\CG7341 (FBgn0036777). It is a protein_coding_gene from Drosophila melanogaster. It has 2 annotated transcripts and 2 polypeptides (1 unique). Gene sequence location is 3L:18112959..18121003. It has the cytological map location 75B10. Its molecular function is unknown. The biological processes in which it is involved are not known. 7 alleles a…
FBgn0052195	3L_18109125_DEL	G	GT	0.1479	25	144	7.25e-06	0.0947379	SiteClass[FBgn0036777|CG7341|INTRON|0;FBgn0052195|CG32195|DOWNSTREAM|51],TranscriptAnnot[UTR_3_PRIME(MODIFIER||266||401|CG32195|protein_coding|CODING|FBtr0075125|4|1);DOWNSTREAM(MODIFIER||51||401|CG32195|protein_coding|CODING|FBtr0333696||1);DOWNSTREAM(MODIFIER||51||401|CG32195|protein_coding|CODING|FBtr0333697||1);INTRON(MODIFIER||||357|CG7341|protein_coding|CODING|FBtr0075124|1|1);INTRON(MODIFI…	This gene is referred to in FlyBase by the symbol Dmel\CG32195 (FBgn0052195). It is a protein_coding_gene from Drosophila melanogaster. It has 3 annotated transcripts and 3 polypeptides (1 unique). Gene sequence location is 3L:18112959..18119150. It has the cytological map location 75B10. Protein features are: CHK kinase-like; Protein kinase-like domain; Protein of unknown function DUF227. Its mo…
FBtr0075125	3L_18109125_DEL	G	GT	0.1479	25	144	7.25e-06	0.0947379	SiteClass[FBgn0036777|CG7341|INTRON|0;FBgn0052195|CG32195|DOWNSTREAM|51],TranscriptAnnot[UTR_3_PRIME(MODIFIER||266||401|CG32195|protein_coding|CODING|FBtr0075125|4|1);DOWNSTREAM(MODIFIER||51||401|CG32195|protein_coding|CODING|FBtr0333696||1);DOWNSTREAM(MODIFIER||51||401|CG32195|protein_coding|CODING|FBtr0333697||1);INTRON(MODIFIER||||357|CG7341|protein_coding|CODING|FBtr0075124|1|1);INTRON(MODIFI…	-
FBtr0333696	3L_18109125_DEL	G	GT	0.1479	25	144	7.25e-06	0.0947379	SiteClass[FBgn0036777|CG7341|INTRON|0;FBgn0052195|CG32195|DOWNSTREAM|51],TranscriptAnnot[UTR_3_PRIME(MODIFIER||266||401|CG32195|protein_coding|CODING|FBtr0075125|4|1);DOWNSTREAM(MODIFIER||51||401|CG32195|protein_coding|CODING|FBtr0333696||1);DOWNSTREAM(MODIFIER||51||401|CG32195|protein_coding|CODING|FBtr0333697||1);INTRON(MODIFIER||||357|CG7341|protein_coding|CODING|FBtr0075124|1|1);INTRON(MODIFI…	-
FBtr0333697	3L_18109125_DEL	G	GT	0.1479	25	144	7.25e-06	0.0947379	SiteClass[FBgn0036777|CG7341|INTRON|0;FBgn0052195|CG32195|DOWNSTREAM|51],TranscriptAnnot[UTR_3_PRIME(MODIFIER||266||401|CG32195|protein_coding|CODING|FBtr0075125|4|1);DOWNSTREAM(MODIFIER||51||401|CG32195|protein_coding|CODING|FBtr0333696||1);DOWNSTREAM(MODIFIER||51||401|CG32195|protein_coding|CODING|FBtr0333697||1);INTRON(MODIFIER||||357|CG7341|protein_coding|CODING|FBtr0075124|1|1);INTRON(MODIFI…	-
FBtr0075124	3L_18109125_DEL	G	GT	0.1479	25	144	7.25e-06	0.0947379	SiteClass[FBgn0036777|CG7341|INTRON|0;FBgn0052195|CG32195|DOWNSTREAM|51],TranscriptAnnot[UTR_3_PRIME(MODIFIER||266||401|CG32195|protein_coding|CODING|FBtr0075125|4|1);DOWNSTREAM(MODIFIER||51||401|CG32195|protein_coding|CODING|FBtr0333696||1);DOWNSTREAM(MODIFIER||51||401|CG32195|protein_coding|CODING|FBtr0333697||1);INTRON(MODIFIER||||357|CG7341|protein_coding|CODING|FBtr0075124|1|1);INTRON(MODIFI…	-
FBtr0075123	3L_18109125_DEL	G	GT	0.1479	25	144	7.25e-06	0.0947379	SiteClass[FBgn0036777|CG7341|INTRON|0;FBgn0052195|CG32195|DOWNSTREAM|51],TranscriptAnnot[UTR_3_PRIME(MODIFIER||266||401|CG32195|protein_coding|CODING|FBtr0075125|4|1);DOWNSTREAM(MODIFIER||51||401|CG32195|protein_coding|CODING|FBtr0333696||1);DOWNSTREAM(MODIFIER||51||401|CG32195|protein_coding|CODING|FBtr0333697||1);INTRON(MODIFIER||||357|CG7341|protein_coding|CODING|FBtr0075124|1|1);INTRON(MODIFI…	-
FBgn0033702	2R_8115887_SNP	T	A	0.2679	45	123	7.26e-06	0.0947379	SiteClass[FBgn0033702|CG8854|INTRON|0],TranscriptAnnot[INTRON(MODIFIER||||392|CG8854|protein_coding|CODING|FBtr0331944|1|1)]	This gene is referred to in FlyBase by the symbol Dmel\CG8854 (FBgn0033702). It is a protein_coding_gene from Drosophila melanogaster. It has 2 annotated transcripts and 2 polypeptides (1 unique). Gene sequence location is 2R:12224461..12229310. It has the cytological map location 48E10. Its molecular function is described by: . It is involved in the biological process described with: . One allel…
FBtr0331944	2R_8115887_SNP	T	A	0.2679	45	123	7.26e-06	0.0947379	SiteClass[FBgn0033702|CG8854|INTRON|0],TranscriptAnnot[INTRON(MODIFIER||||392|CG8854|protein_coding|CODING|FBtr0331944|1|1)]	-
FBgn0262737	3L_21905032_SNP	T	C	0.1273	21	144	7.32e-06	0.0947379	SiteClass[FBgn0262737|mub|INTRON|0],TranscriptAnnot[INTRON(MODIFIER||||386|mub|protein_coding|CODING|FBtr0078468|2|1);INTRON(MODIFIER||||364|mub|protein_coding|CODING|FBtr0078470|2|1);INTRON(MODIFIER||||539|mub|protein_coding|CODING|FBtr0111017|2|1);INTRON(MODIFIER||||557|mub|protein_coding|CODING|FBtr0301364|2|1);INTRON(MODIFIER||||557|mub|protein_coding|CODING|FBtr0304980|3|1);INTRON(MODIFIER||…	The gene mushroom-body expressed is referred to in FlyBase by the symbol Dmel\mub (CG7437, FBgn0262737). It is a protein_coding_gene from Drosophila melanogaster. It has 12 annotated transcripts and 12 polypeptides (10 unique). Gene sequence location is 3L:21844788..21932702. It has the cytological map location 78F4-79A4. Protein features are: K Homology domain; K Homology domain, type 1. Its mol…
FBtr0078468	3L_21905032_SNP	T	C	0.1273	21	144	7.32e-06	0.0947379	SiteClass[FBgn0262737|mub|INTRON|0],TranscriptAnnot[INTRON(MODIFIER||||386|mub|protein_coding|CODING|FBtr0078468|2|1);INTRON(MODIFIER||||364|mub|protein_coding|CODING|FBtr0078470|2|1);INTRON(MODIFIER||||539|mub|protein_coding|CODING|FBtr0111017|2|1);INTRON(MODIFIER||||557|mub|protein_coding|CODING|FBtr0301364|2|1);INTRON(MODIFIER||||557|mub|protein_coding|CODING|FBtr0304980|3|1);INTRON(MODIFIER||…	-
FBtr0078470	3L_21905032_SNP	T	C	0.1273	21	144	7.32e-06	0.0947379	SiteClass[FBgn0262737|mub|INTRON|0],TranscriptAnnot[INTRON(MODIFIER||||386|mub|protein_coding|CODING|FBtr0078468|2|1);INTRON(MODIFIER||||364|mub|protein_coding|CODING|FBtr0078470|2|1);INTRON(MODIFIER||||539|mub|protein_coding|CODING|FBtr0111017|2|1);INTRON(MODIFIER||||557|mub|protein_coding|CODING|FBtr0301364|2|1);INTRON(MODIFIER||||557|mub|protein_coding|CODING|FBtr0304980|3|1);INTRON(MODIFIER||…	-
FBtr0111017	3L_21905032_SNP	T	C	0.1273	21	144	7.32e-06	0.0947379	SiteClass[FBgn0262737|mub|INTRON|0],TranscriptAnnot[INTRON(MODIFIER||||386|mub|protein_coding|CODING|FBtr0078468|2|1);INTRON(MODIFIER||||364|mub|protein_coding|CODING|FBtr0078470|2|1);INTRON(MODIFIER||||539|mub|protein_coding|CODING|FBtr0111017|2|1);INTRON(MODIFIER||||557|mub|protein_coding|CODING|FBtr0301364|2|1);INTRON(MODIFIER||||557|mub|protein_coding|CODING|FBtr0304980|3|1);INTRON(MODIFIER||…	-
FBtr0301364	3L_21905032_SNP	T	C	0.1273	21	144	7.32e-06	0.0947379	SiteClass[FBgn0262737|mub|INTRON|0],TranscriptAnnot[INTRON(MODIFIER||||386|mub|protein_coding|CODING|FBtr0078468|2|1);INTRON(MODIFIER||||364|mub|protein_coding|CODING|FBtr0078470|2|1);INTRON(MODIFIER||||539|mub|protein_coding|CODING|FBtr0111017|2|1);INTRON(MODIFIER||||557|mub|protein_coding|CODING|FBtr0301364|2|1);INTRON(MODIFIER||||557|mub|protein_coding|CODING|FBtr0304980|3|1);INTRON(MODIFIER||…	-
FBtr0304980	3L_21905032_SNP	T	C	0.1273	21	144	7.32e-06	0.0947379	SiteClass[FBgn0262737|mub|INTRON|0],TranscriptAnnot[INTRON(MODIFIER||||386|mub|protein_coding|CODING|FBtr0078468|2|1);INTRON(MODIFIER||||364|mub|protein_coding|CODING|FBtr0078470|2|1);INTRON(MODIFIER||||539|mub|protein_coding|CODING|FBtr0111017|2|1);INTRON(MODIFIER||||557|mub|protein_coding|CODING|FBtr0301364|2|1);INTRON(MODIFIER||||557|mub|protein_coding|CODING|FBtr0304980|3|1);INTRON(MODIFIER||…	-
FBtr0304981	3L_21905032_SNP	T	C	0.1273	21	144	7.32e-06	0.0947379	SiteClass[FBgn0262737|mub|INTRON|0],TranscriptAnnot[INTRON(MODIFIER||||386|mub|protein_coding|CODING|FBtr0078468|2|1);INTRON(MODIFIER||||364|mub|protein_coding|CODING|FBtr0078470|2|1);INTRON(MODIFIER||||539|mub|protein_coding|CODING|FBtr0111017|2|1);INTRON(MODIFIER||||557|mub|protein_coding|CODING|FBtr0301364|2|1);INTRON(MODIFIER||||557|mub|protein_coding|CODING|FBtr0304980|3|1);INTRON(MODIFIER||…	-
FBtr0304982	3L_21905032_SNP	T	C	0.1273	21	144	7.32e-06	0.0947379	SiteClass[FBgn0262737|mub|INTRON|0],TranscriptAnnot[INTRON(MODIFIER||||386|mub|protein_coding|CODING|FBtr0078468|2|1);INTRON(MODIFIER||||364|mub|protein_coding|CODING|FBtr0078470|2|1);INTRON(MODIFIER||||539|mub|protein_coding|CODING|FBtr0111017|2|1);INTRON(MODIFIER||||557|mub|protein_coding|CODING|FBtr0301364|2|1);INTRON(MODIFIER||||557|mub|protein_coding|CODING|FBtr0304980|3|1);INTRON(MODIFIER||…	-
FBtr0304983	3L_21905032_SNP	T	C	0.1273	21	144	7.32e-06	0.0947379	SiteClass[FBgn0262737|mub|INTRON|0],TranscriptAnnot[INTRON(MODIFIER||||386|mub|protein_coding|CODING|FBtr0078468|2|1);INTRON(MODIFIER||||364|mub|protein_coding|CODING|FBtr0078470|2|1);INTRON(MODIFIER||||539|mub|protein_coding|CODING|FBtr0111017|2|1);INTRON(MODIFIER||||557|mub|protein_coding|CODING|FBtr0301364|2|1);INTRON(MODIFIER||||557|mub|protein_coding|CODING|FBtr0304980|3|1);INTRON(MODIFIER||…	-
FBtr0304984	3L_21905032_SNP	T	C	0.1273	21	144	7.32e-06	0.0947379	SiteClass[FBgn0262737|mub|INTRON|0],TranscriptAnnot[INTRON(MODIFIER||||386|mub|protein_coding|CODING|FBtr0078468|2|1);INTRON(MODIFIER||||364|mub|protein_coding|CODING|FBtr0078470|2|1);INTRON(MODIFIER||||539|mub|protein_coding|CODING|FBtr0111017|2|1);INTRON(MODIFIER||||557|mub|protein_coding|CODING|FBtr0301364|2|1);INTRON(MODIFIER||||557|mub|protein_coding|CODING|FBtr0304980|3|1);INTRON(MODIFIER||…	-
FBtr0332736	3L_21905032_SNP	T	C	0.1273	21	144	7.32e-06	0.0947379	SiteClass[FBgn0262737|mub|INTRON|0],TranscriptAnnot[INTRON(MODIFIER||||386|mub|protein_coding|CODING|FBtr0078468|2|1);INTRON(MODIFIER||||364|mub|protein_coding|CODING|FBtr0078470|2|1);INTRON(MODIFIER||||539|mub|protein_coding|CODING|FBtr0111017|2|1);INTRON(MODIFIER||||557|mub|protein_coding|CODING|FBtr0301364|2|1);INTRON(MODIFIER||||557|mub|protein_coding|CODING|FBtr0304980|3|1);INTRON(MODIFIER||…	-
FBtr0333222	3L_21905032_SNP	T	C	0.1273	21	144	7.32e-06	0.0947379	SiteClass[FBgn0262737|mub|INTRON|0],TranscriptAnnot[INTRON(MODIFIER||||386|mub|protein_coding|CODING|FBtr0078468|2|1);INTRON(MODIFIER||||364|mub|protein_coding|CODING|FBtr0078470|2|1);INTRON(MODIFIER||||539|mub|protein_coding|CODING|FBtr0111017|2|1);INTRON(MODIFIER||||557|mub|protein_coding|CODING|FBtr0301364|2|1);INTRON(MODIFIER||||557|mub|protein_coding|CODING|FBtr0304980|3|1);INTRON(MODIFIER||…	-
FBgn0085319	3R_20115134_SNP	C	A	0.1086	19	156	7.34e-06	0.0947379	SiteClass[FBgn0085319|CG34290|INTRON|0;FBgn0263398|CG6364|UPSTREAM|760;FBgn0039178|CG6356|DOWNSTREAM|795],TranscriptAnnot[UPSTREAM(MODIFIER||760||260|CG6364|protein_coding|CODING|FBtr0084602||1);UPSTREAM(MODIFIER||760||305|CG6364|protein_coding|CODING|FBtr0299530||1);UPSTREAM(MODIFIER||760||260|CG6364|protein_coding|CODING|FBtr0309095||1);UPSTREAM(MODIFIER||760||260|CG6364|protein_coding|CODING|F…	This gene is referred to in FlyBase by the symbol Dmel\CG34290 (FBgn0085319). It is a protein_coding_gene from Drosophila melanogaster. It has one annotated transcript and one polypeptide. Gene sequence location is 3R:24288553..24289818. It has the cytological map location 95F9-95F10. Protein features are: Peptidase S1, PA clan; Peptidase S1, trypsin family, active site; Peptidase S1A, chymotryps…
FBgn0263398	3R_20115134_SNP	C	A	0.1086	19	156	7.34e-06	0.0947379	SiteClass[FBgn0085319|CG34290|INTRON|0;FBgn0263398|CG6364|UPSTREAM|760;FBgn0039178|CG6356|DOWNSTREAM|795],TranscriptAnnot[UPSTREAM(MODIFIER||760||260|CG6364|protein_coding|CODING|FBtr0084602||1);UPSTREAM(MODIFIER||760||305|CG6364|protein_coding|CODING|FBtr0299530||1);UPSTREAM(MODIFIER||760||260|CG6364|protein_coding|CODING|FBtr0309095||1);UPSTREAM(MODIFIER||760||260|CG6364|protein_coding|CODING|F…	This gene is referred to in FlyBase by the symbol Dmel\CG6364 (FBgn0263398). It is a protein_coding_gene from Drosophila melanogaster. It has 5 annotated transcripts and 5 polypeptides (2 unique). Gene sequence location is 3R:24290172..24293371. It has the cytological map location 95F10. Protein features are: P-loop containing nucleoside triphosphate hydrolase; Phosphoribulokinase/uridine kinase;…
FBgn0039178	3R_20115134_SNP	C	A	0.1086	19	156	7.34e-06	0.0947379	SiteClass[FBgn0085319|CG34290|INTRON|0;FBgn0263398|CG6364|UPSTREAM|760;FBgn0039178|CG6356|DOWNSTREAM|795],TranscriptAnnot[UPSTREAM(MODIFIER||760||260|CG6364|protein_coding|CODING|FBtr0084602||1);UPSTREAM(MODIFIER||760||305|CG6364|protein_coding|CODING|FBtr0299530||1);UPSTREAM(MODIFIER||760||260|CG6364|protein_coding|CODING|FBtr0309095||1);UPSTREAM(MODIFIER||760||260|CG6364|protein_coding|CODING|F…	This gene is referred to in FlyBase by the symbol Dmel\CG6356 (FBgn0039178). It is a protein_coding_gene from Drosophila melanogaster. It has one annotated transcript and one polypeptide. Gene sequence location is 3R:24283955..24288617. It has the cytological map location 95F9. Protein features are: Major facilitator superfamily domain; Major facilitator, sugar transporter-like. Its molecular fun…
FBtr0084602	3R_20115134_SNP	C	A	0.1086	19	156	7.34e-06	0.0947379	SiteClass[FBgn0085319|CG34290|INTRON|0;FBgn0263398|CG6364|UPSTREAM|760;FBgn0039178|CG6356|DOWNSTREAM|795],TranscriptAnnot[UPSTREAM(MODIFIER||760||260|CG6364|protein_coding|CODING|FBtr0084602||1);UPSTREAM(MODIFIER||760||305|CG6364|protein_coding|CODING|FBtr0299530||1);UPSTREAM(MODIFIER||760||260|CG6364|protein_coding|CODING|FBtr0309095||1);UPSTREAM(MODIFIER||760||260|CG6364|protein_coding|CODING|F…	-
FBtr0299530	3R_20115134_SNP	C	A	0.1086	19	156	7.34e-06	0.0947379	SiteClass[FBgn0085319|CG34290|INTRON|0;FBgn0263398|CG6364|UPSTREAM|760;FBgn0039178|CG6356|DOWNSTREAM|795],TranscriptAnnot[UPSTREAM(MODIFIER||760||260|CG6364|protein_coding|CODING|FBtr0084602||1);UPSTREAM(MODIFIER||760||305|CG6364|protein_coding|CODING|FBtr0299530||1);UPSTREAM(MODIFIER||760||260|CG6364|protein_coding|CODING|FBtr0309095||1);UPSTREAM(MODIFIER||760||260|CG6364|protein_coding|CODING|F…	-
FBtr0309095	3R_20115134_SNP	C	A	0.1086	19	156	7.34e-06	0.0947379	SiteClass[FBgn0085319|CG34290|INTRON|0;FBgn0263398|CG6364|UPSTREAM|760;FBgn0039178|CG6356|DOWNSTREAM|795],TranscriptAnnot[UPSTREAM(MODIFIER||760||260|CG6364|protein_coding|CODING|FBtr0084602||1);UPSTREAM(MODIFIER||760||305|CG6364|protein_coding|CODING|FBtr0299530||1);UPSTREAM(MODIFIER||760||260|CG6364|protein_coding|CODING|FBtr0309095||1);UPSTREAM(MODIFIER||760||260|CG6364|protein_coding|CODING|F…	-
FBtr0309096	3R_20115134_SNP	C	A	0.1086	19	156	7.34e-06	0.0947379	SiteClass[FBgn0085319|CG34290|INTRON|0;FBgn0263398|CG6364|UPSTREAM|760;FBgn0039178|CG6356|DOWNSTREAM|795],TranscriptAnnot[UPSTREAM(MODIFIER||760||260|CG6364|protein_coding|CODING|FBtr0084602||1);UPSTREAM(MODIFIER||760||305|CG6364|protein_coding|CODING|FBtr0299530||1);UPSTREAM(MODIFIER||760||260|CG6364|protein_coding|CODING|FBtr0309095||1);UPSTREAM(MODIFIER||760||260|CG6364|protein_coding|CODING|F…	-
FBtr0309097	3R_20115134_SNP	C	A	0.1086	19	156	7.34e-06	0.0947379	SiteClass[FBgn0085319|CG34290|INTRON|0;FBgn0263398|CG6364|UPSTREAM|760;FBgn0039178|CG6356|DOWNSTREAM|795],TranscriptAnnot[UPSTREAM(MODIFIER||760||260|CG6364|protein_coding|CODING|FBtr0084602||1);UPSTREAM(MODIFIER||760||305|CG6364|protein_coding|CODING|FBtr0299530||1);UPSTREAM(MODIFIER||760||260|CG6364|protein_coding|CODING|FBtr0309095||1);UPSTREAM(MODIFIER||760||260|CG6364|protein_coding|CODING|F…	-
FBtr0084601	3R_20115134_SNP	C	A	0.1086	19	156	7.34e-06	0.0947379	SiteClass[FBgn0085319|CG34290|INTRON|0;FBgn0263398|CG6364|UPSTREAM|760;FBgn0039178|CG6356|DOWNSTREAM|795],TranscriptAnnot[UPSTREAM(MODIFIER||760||260|CG6364|protein_coding|CODING|FBtr0084602||1);UPSTREAM(MODIFIER||760||305|CG6364|protein_coding|CODING|FBtr0299530||1);UPSTREAM(MODIFIER||760||260|CG6364|protein_coding|CODING|FBtr0309095||1);UPSTREAM(MODIFIER||760||260|CG6364|protein_coding|CODING|F…	-
FBtr0299531	3R_20115134_SNP	C	A	0.1086	19	156	7.34e-06	0.0947379	SiteClass[FBgn0085319|CG34290|INTRON|0;FBgn0263398|CG6364|UPSTREAM|760;FBgn0039178|CG6356|DOWNSTREAM|795],TranscriptAnnot[UPSTREAM(MODIFIER||760||260|CG6364|protein_coding|CODING|FBtr0084602||1);UPSTREAM(MODIFIER||760||305|CG6364|protein_coding|CODING|FBtr0299530||1);UPSTREAM(MODIFIER||760||260|CG6364|protein_coding|CODING|FBtr0309095||1);UPSTREAM(MODIFIER||760||260|CG6364|protein_coding|CODING|F…	-
FBgn0263289	3R_22376970_SNP	C	A	0.05143	9	166	7.42e-06	0.0947379	SiteClass[FBgn0263289|scrib|INTRON|0],TranscriptAnnot[INTRON(MODIFIER||||1756|scrib|protein_coding|CODING|FBtr0308620|3|1);INTRON(MODIFIER||||1756|scrib|protein_coding|CODING|FBtr0308621|3|1);INTRON(MODIFIER||||1939|scrib|protein_coding|CODING|FBtr0308622|3|1);INTRON(MODIFIER||||1711|scrib|protein_coding|CODING|FBtr0308623|3|1);INTRON(MODIFIER||||1247|scrib|protein_coding|CODING|FBtr0308624|3|1);…	The gene scribbled is referred to in FlyBase by the symbol Dmel\scrib (CG43398, FBgn0263289). It is a protein_coding_gene from Drosophila melanogaster. It has 18 annotated transcripts and 18 polypeptides (17 unique). Gene sequence location is 3R:26536350..26604051. It has the cytological map location 97B9-97C1. Protein features are: Leucine-rich repeat; Leucine-rich repeat domain, L domain-like; …
FBtr0308620	3R_22376970_SNP	C	A	0.05143	9	166	7.42e-06	0.0947379	SiteClass[FBgn0263289|scrib|INTRON|0],TranscriptAnnot[INTRON(MODIFIER||||1756|scrib|protein_coding|CODING|FBtr0308620|3|1);INTRON(MODIFIER||||1756|scrib|protein_coding|CODING|FBtr0308621|3|1);INTRON(MODIFIER||||1939|scrib|protein_coding|CODING|FBtr0308622|3|1);INTRON(MODIFIER||||1711|scrib|protein_coding|CODING|FBtr0308623|3|1);INTRON(MODIFIER||||1247|scrib|protein_coding|CODING|FBtr0308624|3|1);…	-
FBtr0308621	3R_22376970_SNP	C	A	0.05143	9	166	7.42e-06	0.0947379	SiteClass[FBgn0263289|scrib|INTRON|0],TranscriptAnnot[INTRON(MODIFIER||||1756|scrib|protein_coding|CODING|FBtr0308620|3|1);INTRON(MODIFIER||||1756|scrib|protein_coding|CODING|FBtr0308621|3|1);INTRON(MODIFIER||||1939|scrib|protein_coding|CODING|FBtr0308622|3|1);INTRON(MODIFIER||||1711|scrib|protein_coding|CODING|FBtr0308623|3|1);INTRON(MODIFIER||||1247|scrib|protein_coding|CODING|FBtr0308624|3|1);…	-
FBtr0308622	3R_22376970_SNP	C	A	0.05143	9	166	7.42e-06	0.0947379	SiteClass[FBgn0263289|scrib|INTRON|0],TranscriptAnnot[INTRON(MODIFIER||||1756|scrib|protein_coding|CODING|FBtr0308620|3|1);INTRON(MODIFIER||||1756|scrib|protein_coding|CODING|FBtr0308621|3|1);INTRON(MODIFIER||||1939|scrib|protein_coding|CODING|FBtr0308622|3|1);INTRON(MODIFIER||||1711|scrib|protein_coding|CODING|FBtr0308623|3|1);INTRON(MODIFIER||||1247|scrib|protein_coding|CODING|FBtr0308624|3|1);…	-
FBtr0308623	3R_22376970_SNP	C	A	0.05143	9	166	7.42e-06	0.0947379	SiteClass[FBgn0263289|scrib|INTRON|0],TranscriptAnnot[INTRON(MODIFIER||||1756|scrib|protein_coding|CODING|FBtr0308620|3|1);INTRON(MODIFIER||||1756|scrib|protein_coding|CODING|FBtr0308621|3|1);INTRON(MODIFIER||||1939|scrib|protein_coding|CODING|FBtr0308622|3|1);INTRON(MODIFIER||||1711|scrib|protein_coding|CODING|FBtr0308623|3|1);INTRON(MODIFIER||||1247|scrib|protein_coding|CODING|FBtr0308624|3|1);…	-
FBtr0308624	3R_22376970_SNP	C	A	0.05143	9	166	7.42e-06	0.0947379	SiteClass[FBgn0263289|scrib|INTRON|0],TranscriptAnnot[INTRON(MODIFIER||||1756|scrib|protein_coding|CODING|FBtr0308620|3|1);INTRON(MODIFIER||||1756|scrib|protein_coding|CODING|FBtr0308621|3|1);INTRON(MODIFIER||||1939|scrib|protein_coding|CODING|FBtr0308622|3|1);INTRON(MODIFIER||||1711|scrib|protein_coding|CODING|FBtr0308623|3|1);INTRON(MODIFIER||||1247|scrib|protein_coding|CODING|FBtr0308624|3|1);…	-
FBtr0308625	3R_22376970_SNP	C	A	0.05143	9	166	7.42e-06	0.0947379	SiteClass[FBgn0263289|scrib|INTRON|0],TranscriptAnnot[INTRON(MODIFIER||||1756|scrib|protein_coding|CODING|FBtr0308620|3|1);INTRON(MODIFIER||||1756|scrib|protein_coding|CODING|FBtr0308621|3|1);INTRON(MODIFIER||||1939|scrib|protein_coding|CODING|FBtr0308622|3|1);INTRON(MODIFIER||||1711|scrib|protein_coding|CODING|FBtr0308623|3|1);INTRON(MODIFIER||||1247|scrib|protein_coding|CODING|FBtr0308624|3|1);…	-
FBtr0308626	3R_22376970_SNP	C	A	0.05143	9	166	7.42e-06	0.0947379	SiteClass[FBgn0263289|scrib|INTRON|0],TranscriptAnnot[INTRON(MODIFIER||||1756|scrib|protein_coding|CODING|FBtr0308620|3|1);INTRON(MODIFIER||||1756|scrib|protein_coding|CODING|FBtr0308621|3|1);INTRON(MODIFIER||||1939|scrib|protein_coding|CODING|FBtr0308622|3|1);INTRON(MODIFIER||||1711|scrib|protein_coding|CODING|FBtr0308623|3|1);INTRON(MODIFIER||||1247|scrib|protein_coding|CODING|FBtr0308624|3|1);…	-
FBtr0308627	3R_22376970_SNP	C	A	0.05143	9	166	7.42e-06	0.0947379	SiteClass[FBgn0263289|scrib|INTRON|0],TranscriptAnnot[INTRON(MODIFIER||||1756|scrib|protein_coding|CODING|FBtr0308620|3|1);INTRON(MODIFIER||||1756|scrib|protein_coding|CODING|FBtr0308621|3|1);INTRON(MODIFIER||||1939|scrib|protein_coding|CODING|FBtr0308622|3|1);INTRON(MODIFIER||||1711|scrib|protein_coding|CODING|FBtr0308623|3|1);INTRON(MODIFIER||||1247|scrib|protein_coding|CODING|FBtr0308624|3|1);…	-
FBtr0308628	3R_22376970_SNP	C	A	0.05143	9	166	7.42e-06	0.0947379	SiteClass[FBgn0263289|scrib|INTRON|0],TranscriptAnnot[INTRON(MODIFIER||||1756|scrib|protein_coding|CODING|FBtr0308620|3|1);INTRON(MODIFIER||||1756|scrib|protein_coding|CODING|FBtr0308621|3|1);INTRON(MODIFIER||||1939|scrib|protein_coding|CODING|FBtr0308622|3|1);INTRON(MODIFIER||||1711|scrib|protein_coding|CODING|FBtr0308623|3|1);INTRON(MODIFIER||||1247|scrib|protein_coding|CODING|FBtr0308624|3|1);…	-
FBtr0308629	3R_22376970_SNP	C	A	0.05143	9	166	7.42e-06	0.0947379	SiteClass[FBgn0263289|scrib|INTRON|0],TranscriptAnnot[INTRON(MODIFIER||||1756|scrib|protein_coding|CODING|FBtr0308620|3|1);INTRON(MODIFIER||||1756|scrib|protein_coding|CODING|FBtr0308621|3|1);INTRON(MODIFIER||||1939|scrib|protein_coding|CODING|FBtr0308622|3|1);INTRON(MODIFIER||||1711|scrib|protein_coding|CODING|FBtr0308623|3|1);INTRON(MODIFIER||||1247|scrib|protein_coding|CODING|FBtr0308624|3|1);…	-
FBtr0308630	3R_22376970_SNP	C	A	0.05143	9	166	7.42e-06	0.0947379	SiteClass[FBgn0263289|scrib|INTRON|0],TranscriptAnnot[INTRON(MODIFIER||||1756|scrib|protein_coding|CODING|FBtr0308620|3|1);INTRON(MODIFIER||||1756|scrib|protein_coding|CODING|FBtr0308621|3|1);INTRON(MODIFIER||||1939|scrib|protein_coding|CODING|FBtr0308622|3|1);INTRON(MODIFIER||||1711|scrib|protein_coding|CODING|FBtr0308623|3|1);INTRON(MODIFIER||||1247|scrib|protein_coding|CODING|FBtr0308624|3|1);…	-
FBtr0308631	3R_22376970_SNP	C	A	0.05143	9	166	7.42e-06	0.0947379	SiteClass[FBgn0263289|scrib|INTRON|0],TranscriptAnnot[INTRON(MODIFIER||||1756|scrib|protein_coding|CODING|FBtr0308620|3|1);INTRON(MODIFIER||||1756|scrib|protein_coding|CODING|FBtr0308621|3|1);INTRON(MODIFIER||||1939|scrib|protein_coding|CODING|FBtr0308622|3|1);INTRON(MODIFIER||||1711|scrib|protein_coding|CODING|FBtr0308623|3|1);INTRON(MODIFIER||||1247|scrib|protein_coding|CODING|FBtr0308624|3|1);…	-
FBtr0308632	3R_22376970_SNP	C	A	0.05143	9	166	7.42e-06	0.0947379	SiteClass[FBgn0263289|scrib|INTRON|0],TranscriptAnnot[INTRON(MODIFIER||||1756|scrib|protein_coding|CODING|FBtr0308620|3|1);INTRON(MODIFIER||||1756|scrib|protein_coding|CODING|FBtr0308621|3|1);INTRON(MODIFIER||||1939|scrib|protein_coding|CODING|FBtr0308622|3|1);INTRON(MODIFIER||||1711|scrib|protein_coding|CODING|FBtr0308623|3|1);INTRON(MODIFIER||||1247|scrib|protein_coding|CODING|FBtr0308624|3|1);…	-
FBtr0308633	3R_22376970_SNP	C	A	0.05143	9	166	7.42e-06	0.0947379	SiteClass[FBgn0263289|scrib|INTRON|0],TranscriptAnnot[INTRON(MODIFIER||||1756|scrib|protein_coding|CODING|FBtr0308620|3|1);INTRON(MODIFIER||||1756|scrib|protein_coding|CODING|FBtr0308621|3|1);INTRON(MODIFIER||||1939|scrib|protein_coding|CODING|FBtr0308622|3|1);INTRON(MODIFIER||||1711|scrib|protein_coding|CODING|FBtr0308623|3|1);INTRON(MODIFIER||||1247|scrib|protein_coding|CODING|FBtr0308624|3|1);…	-
FBtr0308634	3R_22376970_SNP	C	A	0.05143	9	166	7.42e-06	0.0947379	SiteClass[FBgn0263289|scrib|INTRON|0],TranscriptAnnot[INTRON(MODIFIER||||1756|scrib|protein_coding|CODING|FBtr0308620|3|1);INTRON(MODIFIER||||1756|scrib|protein_coding|CODING|FBtr0308621|3|1);INTRON(MODIFIER||||1939|scrib|protein_coding|CODING|FBtr0308622|3|1);INTRON(MODIFIER||||1711|scrib|protein_coding|CODING|FBtr0308623|3|1);INTRON(MODIFIER||||1247|scrib|protein_coding|CODING|FBtr0308624|3|1);…	-
FBtr0335521	3R_22376970_SNP	C	A	0.05143	9	166	7.42e-06	0.0947379	SiteClass[FBgn0263289|scrib|INTRON|0],TranscriptAnnot[INTRON(MODIFIER||||1756|scrib|protein_coding|CODING|FBtr0308620|3|1);INTRON(MODIFIER||||1756|scrib|protein_coding|CODING|FBtr0308621|3|1);INTRON(MODIFIER||||1939|scrib|protein_coding|CODING|FBtr0308622|3|1);INTRON(MODIFIER||||1711|scrib|protein_coding|CODING|FBtr0308623|3|1);INTRON(MODIFIER||||1247|scrib|protein_coding|CODING|FBtr0308624|3|1);…	-
FBtr0335522	3R_22376970_SNP	C	A	0.05143	9	166	7.42e-06	0.0947379	SiteClass[FBgn0263289|scrib|INTRON|0],TranscriptAnnot[INTRON(MODIFIER||||1756|scrib|protein_coding|CODING|FBtr0308620|3|1);INTRON(MODIFIER||||1756|scrib|protein_coding|CODING|FBtr0308621|3|1);INTRON(MODIFIER||||1939|scrib|protein_coding|CODING|FBtr0308622|3|1);INTRON(MODIFIER||||1711|scrib|protein_coding|CODING|FBtr0308623|3|1);INTRON(MODIFIER||||1247|scrib|protein_coding|CODING|FBtr0308624|3|1);…	-
FBgn0052296	3L_2721275_SNP	A	G	0.06857	12	163	7.45e-06	0.0947379	SiteClass[FBgn0052296|Mrtf|NON_SYNONYMOUS_CODING|0],TranscriptAnnot[NON_SYNONYMOUS_CODING(MODERATE|MISSENSE|Ccg/Tcg|P1001S|1495|Mrtf|protein_coding|CODING|FBtr0306331|5|1);NON_SYNONYMOUS_CODING(MODERATE|MISSENSE|Ccg/Tcg|P1294S|1788|Mrtf|protein_coding|CODING|FBtr0344569|5|1);NON_SYNONYMOUS_CODING(MODERATE|MISSENSE|Ccg/Tcg|P1001S|1495|Mrtf|protein_coding|CODING|FBtr0333444|5|1)]	The gene Myocardin-related transcription factor is referred to in FlyBase by the symbol Dmel\Mrtf (CG32296, FBgn0052296). It is a protein_coding_gene from Drosophila melanogaster. It has 3 annotated transcripts and 3 polypeptides (2 unique). Gene sequence location is 3L:2717615..2766536. It has the cytological map location 62F2-62F3. Protein features are: RPEL repeat; SAP domain. Its molecular fu…
FBtr0306331	3L_2721275_SNP	A	G	0.06857	12	163	7.45e-06	0.0947379	SiteClass[FBgn0052296|Mrtf|NON_SYNONYMOUS_CODING|0],TranscriptAnnot[NON_SYNONYMOUS_CODING(MODERATE|MISSENSE|Ccg/Tcg|P1001S|1495|Mrtf|protein_coding|CODING|FBtr0306331|5|1);NON_SYNONYMOUS_CODING(MODERATE|MISSENSE|Ccg/Tcg|P1294S|1788|Mrtf|protein_coding|CODING|FBtr0344569|5|1);NON_SYNONYMOUS_CODING(MODERATE|MISSENSE|Ccg/Tcg|P1001S|1495|Mrtf|protein_coding|CODING|FBtr0333444|5|1)]	-
FBtr0344569	3L_2721275_SNP	A	G	0.06857	12	163	7.45e-06	0.0947379	SiteClass[FBgn0052296|Mrtf|NON_SYNONYMOUS_CODING|0],TranscriptAnnot[NON_SYNONYMOUS_CODING(MODERATE|MISSENSE|Ccg/Tcg|P1001S|1495|Mrtf|protein_coding|CODING|FBtr0306331|5|1);NON_SYNONYMOUS_CODING(MODERATE|MISSENSE|Ccg/Tcg|P1294S|1788|Mrtf|protein_coding|CODING|FBtr0344569|5|1);NON_SYNONYMOUS_CODING(MODERATE|MISSENSE|Ccg/Tcg|P1001S|1495|Mrtf|protein_coding|CODING|FBtr0333444|5|1)]	-
FBtr0333444	3L_2721275_SNP	A	G	0.06857	12	163	7.45e-06	0.0947379	SiteClass[FBgn0052296|Mrtf|NON_SYNONYMOUS_CODING|0],TranscriptAnnot[NON_SYNONYMOUS_CODING(MODERATE|MISSENSE|Ccg/Tcg|P1001S|1495|Mrtf|protein_coding|CODING|FBtr0306331|5|1);NON_SYNONYMOUS_CODING(MODERATE|MISSENSE|Ccg/Tcg|P1294S|1788|Mrtf|protein_coding|CODING|FBtr0344569|5|1);NON_SYNONYMOUS_CODING(MODERATE|MISSENSE|Ccg/Tcg|P1001S|1495|Mrtf|protein_coding|CODING|FBtr0333444|5|1)]	-
FBgn0023097	3R_16427783_SNP	G	A	0.05556	10	170	7.53e-06	0.0947379	SiteClass[FBgn0023097|bon|INTRON|0],TranscriptAnnot[INTRON(MODIFIER||||1133|bon|protein_coding|CODING|FBtr0083912|1|1);INTRON(MODIFIER||||1125|bon|protein_coding|CODING|FBtr0300617|1|1);INTRON(MODIFIER||||1207|bon|protein_coding|CODING|FBtr0330043|1|1);INTRON(MODIFIER||||1119|bon|protein_coding|CODING|FBtr0334637|1|1);INTRON(MODIFIER||||1125|bon|protein_coding|CODING|FBtr0334638|1|1);INTRON(MODIF…	The gene bonus is referred to in FlyBase by the symbol Dmel\bon (CG5206, FBgn0023097). It is a protein_coding_gene from Drosophila melanogaster. It has 6 annotated transcripts and 6 polypeptides (all unique). Gene sequence location is 3R:20593139..20612540. It has the cytological map location 92F2-92F3. Protein features are: B-box, C-terminal; B-box-type zinc finger; Bromodomain; Zinc finger, FYV…
FBtr0083912	3R_16427783_SNP	G	A	0.05556	10	170	7.53e-06	0.0947379	SiteClass[FBgn0023097|bon|INTRON|0],TranscriptAnnot[INTRON(MODIFIER||||1133|bon|protein_coding|CODING|FBtr0083912|1|1);INTRON(MODIFIER||||1125|bon|protein_coding|CODING|FBtr0300617|1|1);INTRON(MODIFIER||||1207|bon|protein_coding|CODING|FBtr0330043|1|1);INTRON(MODIFIER||||1119|bon|protein_coding|CODING|FBtr0334637|1|1);INTRON(MODIFIER||||1125|bon|protein_coding|CODING|FBtr0334638|1|1);INTRON(MODIF…	-
FBtr0300617	3R_16427783_SNP	G	A	0.05556	10	170	7.53e-06	0.0947379	SiteClass[FBgn0023097|bon|INTRON|0],TranscriptAnnot[INTRON(MODIFIER||||1133|bon|protein_coding|CODING|FBtr0083912|1|1);INTRON(MODIFIER||||1125|bon|protein_coding|CODING|FBtr0300617|1|1);INTRON(MODIFIER||||1207|bon|protein_coding|CODING|FBtr0330043|1|1);INTRON(MODIFIER||||1119|bon|protein_coding|CODING|FBtr0334637|1|1);INTRON(MODIFIER||||1125|bon|protein_coding|CODING|FBtr0334638|1|1);INTRON(MODIF…	-
FBtr0330043	3R_16427783_SNP	G	A	0.05556	10	170	7.53e-06	0.0947379	SiteClass[FBgn0023097|bon|INTRON|0],TranscriptAnnot[INTRON(MODIFIER||||1133|bon|protein_coding|CODING|FBtr0083912|1|1);INTRON(MODIFIER||||1125|bon|protein_coding|CODING|FBtr0300617|1|1);INTRON(MODIFIER||||1207|bon|protein_coding|CODING|FBtr0330043|1|1);INTRON(MODIFIER||||1119|bon|protein_coding|CODING|FBtr0334637|1|1);INTRON(MODIFIER||||1125|bon|protein_coding|CODING|FBtr0334638|1|1);INTRON(MODIF…	-
FBtr0334637	3R_16427783_SNP	G	A	0.05556	10	170	7.53e-06	0.0947379	SiteClass[FBgn0023097|bon|INTRON|0],TranscriptAnnot[INTRON(MODIFIER||||1133|bon|protein_coding|CODING|FBtr0083912|1|1);INTRON(MODIFIER||||1125|bon|protein_coding|CODING|FBtr0300617|1|1);INTRON(MODIFIER||||1207|bon|protein_coding|CODING|FBtr0330043|1|1);INTRON(MODIFIER||||1119|bon|protein_coding|CODING|FBtr0334637|1|1);INTRON(MODIFIER||||1125|bon|protein_coding|CODING|FBtr0334638|1|1);INTRON(MODIF…	-
FBtr0334638	3R_16427783_SNP	G	A	0.05556	10	170	7.53e-06	0.0947379	SiteClass[FBgn0023097|bon|INTRON|0],TranscriptAnnot[INTRON(MODIFIER||||1133|bon|protein_coding|CODING|FBtr0083912|1|1);INTRON(MODIFIER||||1125|bon|protein_coding|CODING|FBtr0300617|1|1);INTRON(MODIFIER||||1207|bon|protein_coding|CODING|FBtr0330043|1|1);INTRON(MODIFIER||||1119|bon|protein_coding|CODING|FBtr0334637|1|1);INTRON(MODIFIER||||1125|bon|protein_coding|CODING|FBtr0334638|1|1);INTRON(MODIF…	-
FBtr0334639	3R_16427783_SNP	G	A	0.05556	10	170	7.53e-06	0.0947379	SiteClass[FBgn0023097|bon|INTRON|0],TranscriptAnnot[INTRON(MODIFIER||||1133|bon|protein_coding|CODING|FBtr0083912|1|1);INTRON(MODIFIER||||1125|bon|protein_coding|CODING|FBtr0300617|1|1);INTRON(MODIFIER||||1207|bon|protein_coding|CODING|FBtr0330043|1|1);INTRON(MODIFIER||||1119|bon|protein_coding|CODING|FBtr0334637|1|1);INTRON(MODIFIER||||1125|bon|protein_coding|CODING|FBtr0334638|1|1);INTRON(MODIF…	-
FBgn0016061	3R_23230743_SNP	T	A	0.1264	22	152	7.55e-06	0.0947379	SiteClass[FBgn0016061|side|INTRON|0],TranscriptAnnot[INTRON(MODIFIER||||939|side|protein_coding|CODING|FBtr0085168|2|1);INTRON(MODIFIER||||929|side|protein_coding|CODING|FBtr0289998|2|1);INTRON(MODIFIER||||986|side|protein_coding|CODING|FBtr0309179|2|1);INTRON(MODIFIER||||943|side|protein_coding|CODING|FBtr0309180|2|1)]	The gene sidestep is referred to in FlyBase by the symbol Dmel\side (CG31062, FBgn0016061). It is a protein_coding_gene from Drosophila melanogaster. It has 4 annotated transcripts and 4 polypeptides (all unique). Gene sequence location is 3R:27375088..27437482. It has the cytological map location 97F6-98A1. Protein features are: CD80-like, immunoglobulin C2-set; Fibronectin type III; Immunoglobu…
FBtr0085168	3R_23230743_SNP	T	A	0.1264	22	152	7.55e-06	0.0947379	SiteClass[FBgn0016061|side|INTRON|0],TranscriptAnnot[INTRON(MODIFIER||||939|side|protein_coding|CODING|FBtr0085168|2|1);INTRON(MODIFIER||||929|side|protein_coding|CODING|FBtr0289998|2|1);INTRON(MODIFIER||||986|side|protein_coding|CODING|FBtr0309179|2|1);INTRON(MODIFIER||||943|side|protein_coding|CODING|FBtr0309180|2|1)]	-
FBtr0289998	3R_23230743_SNP	T	A	0.1264	22	152	7.55e-06	0.0947379	SiteClass[FBgn0016061|side|INTRON|0],TranscriptAnnot[INTRON(MODIFIER||||939|side|protein_coding|CODING|FBtr0085168|2|1);INTRON(MODIFIER||||929|side|protein_coding|CODING|FBtr0289998|2|1);INTRON(MODIFIER||||986|side|protein_coding|CODING|FBtr0309179|2|1);INTRON(MODIFIER||||943|side|protein_coding|CODING|FBtr0309180|2|1)]	-
FBtr0309179	3R_23230743_SNP	T	A	0.1264	22	152	7.55e-06	0.0947379	SiteClass[FBgn0016061|side|INTRON|0],TranscriptAnnot[INTRON(MODIFIER||||939|side|protein_coding|CODING|FBtr0085168|2|1);INTRON(MODIFIER||||929|side|protein_coding|CODING|FBtr0289998|2|1);INTRON(MODIFIER||||986|side|protein_coding|CODING|FBtr0309179|2|1);INTRON(MODIFIER||||943|side|protein_coding|CODING|FBtr0309180|2|1)]	-
FBtr0309180	3R_23230743_SNP	T	A	0.1264	22	152	7.55e-06	0.0947379	SiteClass[FBgn0016061|side|INTRON|0],TranscriptAnnot[INTRON(MODIFIER||||939|side|protein_coding|CODING|FBtr0085168|2|1);INTRON(MODIFIER||||929|side|protein_coding|CODING|FBtr0289998|2|1);INTRON(MODIFIER||||986|side|protein_coding|CODING|FBtr0309179|2|1);INTRON(MODIFIER||||943|side|protein_coding|CODING|FBtr0309180|2|1)]	-
FBgn0261928	3R_6075507_SNP	A	T	0.08434	14	152	7.7e-06	0.0947379	SiteClass[FBgn0261928|CG42795|INTRON|0],TranscriptAnnot[SYNONYMOUS_CODING(LOW|SILENT|acT/acA|T3007|3068|CG42795|protein_coding|CODING|FBtr0303602|11|1);SYNONYMOUS_CODING(LOW|SILENT|acT/acA|T3152|3213|CG42795|protein_coding|CODING|FBtr0345171|9|1);SYNONYMOUS_CODING(LOW|SILENT|acT/acA|T3128|3189|CG42795|protein_coding|CODING|FBtr0303601|10|1);SYNONYMOUS_CODING(LOW|SILENT|acT/acA|T3129|3190|CG42795|…	This gene is referred to in FlyBase by the symbol Dmel\CG42795 (FBgn0261928). It is a protein_coding_gene from Drosophila melanogaster. It has 6 annotated transcripts and 6 polypeptides (all unique). Gene sequence location is 3R:10225690..10251277. It has the cytological map location 86A1. Protein features are: Rab-GTPase-TBC domain; TBC1 domain family member 30, C-terminal. Its molecular functio…
FBtr0303602	3R_6075507_SNP	A	T	0.08434	14	152	7.7e-06	0.0947379	SiteClass[FBgn0261928|CG42795|INTRON|0],TranscriptAnnot[SYNONYMOUS_CODING(LOW|SILENT|acT/acA|T3007|3068|CG42795|protein_coding|CODING|FBtr0303602|11|1);SYNONYMOUS_CODING(LOW|SILENT|acT/acA|T3152|3213|CG42795|protein_coding|CODING|FBtr0345171|9|1);SYNONYMOUS_CODING(LOW|SILENT|acT/acA|T3128|3189|CG42795|protein_coding|CODING|FBtr0303601|10|1);SYNONYMOUS_CODING(LOW|SILENT|acT/acA|T3129|3190|CG42795|…	-
FBtr0345171	3R_6075507_SNP	A	T	0.08434	14	152	7.7e-06	0.0947379	SiteClass[FBgn0261928|CG42795|INTRON|0],TranscriptAnnot[SYNONYMOUS_CODING(LOW|SILENT|acT/acA|T3007|3068|CG42795|protein_coding|CODING|FBtr0303602|11|1);SYNONYMOUS_CODING(LOW|SILENT|acT/acA|T3152|3213|CG42795|protein_coding|CODING|FBtr0345171|9|1);SYNONYMOUS_CODING(LOW|SILENT|acT/acA|T3128|3189|CG42795|protein_coding|CODING|FBtr0303601|10|1);SYNONYMOUS_CODING(LOW|SILENT|acT/acA|T3129|3190|CG42795|…	-
FBtr0303601	3R_6075507_SNP	A	T	0.08434	14	152	7.7e-06	0.0947379	SiteClass[FBgn0261928|CG42795|INTRON|0],TranscriptAnnot[SYNONYMOUS_CODING(LOW|SILENT|acT/acA|T3007|3068|CG42795|protein_coding|CODING|FBtr0303602|11|1);SYNONYMOUS_CODING(LOW|SILENT|acT/acA|T3152|3213|CG42795|protein_coding|CODING|FBtr0345171|9|1);SYNONYMOUS_CODING(LOW|SILENT|acT/acA|T3128|3189|CG42795|protein_coding|CODING|FBtr0303601|10|1);SYNONYMOUS_CODING(LOW|SILENT|acT/acA|T3129|3190|CG42795|…	-
FBtr0345169	3R_6075507_SNP	A	T	0.08434	14	152	7.7e-06	0.0947379	SiteClass[FBgn0261928|CG42795|INTRON|0],TranscriptAnnot[SYNONYMOUS_CODING(LOW|SILENT|acT/acA|T3007|3068|CG42795|protein_coding|CODING|FBtr0303602|11|1);SYNONYMOUS_CODING(LOW|SILENT|acT/acA|T3152|3213|CG42795|protein_coding|CODING|FBtr0345171|9|1);SYNONYMOUS_CODING(LOW|SILENT|acT/acA|T3128|3189|CG42795|protein_coding|CODING|FBtr0303601|10|1);SYNONYMOUS_CODING(LOW|SILENT|acT/acA|T3129|3190|CG42795|…	-
FBtr0332437	3R_6075507_SNP	A	T	0.08434	14	152	7.7e-06	0.0947379	SiteClass[FBgn0261928|CG42795|INTRON|0],TranscriptAnnot[SYNONYMOUS_CODING(LOW|SILENT|acT/acA|T3007|3068|CG42795|protein_coding|CODING|FBtr0303602|11|1);SYNONYMOUS_CODING(LOW|SILENT|acT/acA|T3152|3213|CG42795|protein_coding|CODING|FBtr0345171|9|1);SYNONYMOUS_CODING(LOW|SILENT|acT/acA|T3128|3189|CG42795|protein_coding|CODING|FBtr0303601|10|1);SYNONYMOUS_CODING(LOW|SILENT|acT/acA|T3129|3190|CG42795|…	-
FBtr0345170	3R_6075507_SNP	A	T	0.08434	14	152	7.7e-06	0.0947379	SiteClass[FBgn0261928|CG42795|INTRON|0],TranscriptAnnot[SYNONYMOUS_CODING(LOW|SILENT|acT/acA|T3007|3068|CG42795|protein_coding|CODING|FBtr0303602|11|1);SYNONYMOUS_CODING(LOW|SILENT|acT/acA|T3152|3213|CG42795|protein_coding|CODING|FBtr0345171|9|1);SYNONYMOUS_CODING(LOW|SILENT|acT/acA|T3128|3189|CG42795|protein_coding|CODING|FBtr0303601|10|1);SYNONYMOUS_CODING(LOW|SILENT|acT/acA|T3129|3190|CG42795|…	-
FBgn0261928	3R_6075519_SNP	A	T	0.08434	14	152	7.7e-06	0.0947379	SiteClass[FBgn0261928|CG42795|INTRON|0],TranscriptAnnot[SYNONYMOUS_CODING(LOW|SILENT|gtT/gtA|V3011|3068|CG42795|protein_coding|CODING|FBtr0303602|11|1);SYNONYMOUS_CODING(LOW|SILENT|gtT/gtA|V3156|3213|CG42795|protein_coding|CODING|FBtr0345171|9|1);SYNONYMOUS_CODING(LOW|SILENT|gtT/gtA|V3132|3189|CG42795|protein_coding|CODING|FBtr0303601|10|1);SYNONYMOUS_CODING(LOW|SILENT|gtT/gtA|V3133|3190|CG42795|…	This gene is referred to in FlyBase by the symbol Dmel\CG42795 (FBgn0261928). It is a protein_coding_gene from Drosophila melanogaster. It has 6 annotated transcripts and 6 polypeptides (all unique). Gene sequence location is 3R:10225690..10251277. It has the cytological map location 86A1. Protein features are: Rab-GTPase-TBC domain; TBC1 domain family member 30, C-terminal. Its molecular functio…
FBtr0303602	3R_6075519_SNP	A	T	0.08434	14	152	7.7e-06	0.0947379	SiteClass[FBgn0261928|CG42795|INTRON|0],TranscriptAnnot[SYNONYMOUS_CODING(LOW|SILENT|gtT/gtA|V3011|3068|CG42795|protein_coding|CODING|FBtr0303602|11|1);SYNONYMOUS_CODING(LOW|SILENT|gtT/gtA|V3156|3213|CG42795|protein_coding|CODING|FBtr0345171|9|1);SYNONYMOUS_CODING(LOW|SILENT|gtT/gtA|V3132|3189|CG42795|protein_coding|CODING|FBtr0303601|10|1);SYNONYMOUS_CODING(LOW|SILENT|gtT/gtA|V3133|3190|CG42795|…	-
FBtr0345171	3R_6075519_SNP	A	T	0.08434	14	152	7.7e-06	0.0947379	SiteClass[FBgn0261928|CG42795|INTRON|0],TranscriptAnnot[SYNONYMOUS_CODING(LOW|SILENT|gtT/gtA|V3011|3068|CG42795|protein_coding|CODING|FBtr0303602|11|1);SYNONYMOUS_CODING(LOW|SILENT|gtT/gtA|V3156|3213|CG42795|protein_coding|CODING|FBtr0345171|9|1);SYNONYMOUS_CODING(LOW|SILENT|gtT/gtA|V3132|3189|CG42795|protein_coding|CODING|FBtr0303601|10|1);SYNONYMOUS_CODING(LOW|SILENT|gtT/gtA|V3133|3190|CG42795|…	-
FBtr0303601	3R_6075519_SNP	A	T	0.08434	14	152	7.7e-06	0.0947379	SiteClass[FBgn0261928|CG42795|INTRON|0],TranscriptAnnot[SYNONYMOUS_CODING(LOW|SILENT|gtT/gtA|V3011|3068|CG42795|protein_coding|CODING|FBtr0303602|11|1);SYNONYMOUS_CODING(LOW|SILENT|gtT/gtA|V3156|3213|CG42795|protein_coding|CODING|FBtr0345171|9|1);SYNONYMOUS_CODING(LOW|SILENT|gtT/gtA|V3132|3189|CG42795|protein_coding|CODING|FBtr0303601|10|1);SYNONYMOUS_CODING(LOW|SILENT|gtT/gtA|V3133|3190|CG42795|…	-
FBtr0345169	3R_6075519_SNP	A	T	0.08434	14	152	7.7e-06	0.0947379	SiteClass[FBgn0261928|CG42795|INTRON|0],TranscriptAnnot[SYNONYMOUS_CODING(LOW|SILENT|gtT/gtA|V3011|3068|CG42795|protein_coding|CODING|FBtr0303602|11|1);SYNONYMOUS_CODING(LOW|SILENT|gtT/gtA|V3156|3213|CG42795|protein_coding|CODING|FBtr0345171|9|1);SYNONYMOUS_CODING(LOW|SILENT|gtT/gtA|V3132|3189|CG42795|protein_coding|CODING|FBtr0303601|10|1);SYNONYMOUS_CODING(LOW|SILENT|gtT/gtA|V3133|3190|CG42795|…	-
FBtr0332437	3R_6075519_SNP	A	T	0.08434	14	152	7.7e-06	0.0947379	SiteClass[FBgn0261928|CG42795|INTRON|0],TranscriptAnnot[SYNONYMOUS_CODING(LOW|SILENT|gtT/gtA|V3011|3068|CG42795|protein_coding|CODING|FBtr0303602|11|1);SYNONYMOUS_CODING(LOW|SILENT|gtT/gtA|V3156|3213|CG42795|protein_coding|CODING|FBtr0345171|9|1);SYNONYMOUS_CODING(LOW|SILENT|gtT/gtA|V3132|3189|CG42795|protein_coding|CODING|FBtr0303601|10|1);SYNONYMOUS_CODING(LOW|SILENT|gtT/gtA|V3133|3190|CG42795|…	-
FBtr0345170	3R_6075519_SNP	A	T	0.08434	14	152	7.7e-06	0.0947379	SiteClass[FBgn0261928|CG42795|INTRON|0],TranscriptAnnot[SYNONYMOUS_CODING(LOW|SILENT|gtT/gtA|V3011|3068|CG42795|protein_coding|CODING|FBtr0303602|11|1);SYNONYMOUS_CODING(LOW|SILENT|gtT/gtA|V3156|3213|CG42795|protein_coding|CODING|FBtr0345171|9|1);SYNONYMOUS_CODING(LOW|SILENT|gtT/gtA|V3132|3189|CG42795|protein_coding|CODING|FBtr0303601|10|1);SYNONYMOUS_CODING(LOW|SILENT|gtT/gtA|V3133|3190|CG42795|…	-
FBgn0033702	2R_8115891_INS	A	ACAAAC	0.2733	47	125	7.71e-06	0.0947379	SiteClass[FBgn0033702|CG8854|INTRON|0],TranscriptAnnot[INTRON(MODIFIER||||392|CG8854|protein_coding|CODING|FBtr0331944|1|1)]	This gene is referred to in FlyBase by the symbol Dmel\CG8854 (FBgn0033702). It is a protein_coding_gene from Drosophila melanogaster. It has 2 annotated transcripts and 2 polypeptides (1 unique). Gene sequence location is 2R:12224461..12229310. It has the cytological map location 48E10. Its molecular function is described by: . It is involved in the biological process described with: . One allel…
FBtr0331944	2R_8115891_INS	A	ACAAAC	0.2733	47	125	7.71e-06	0.0947379	SiteClass[FBgn0033702|CG8854|INTRON|0],TranscriptAnnot[INTRON(MODIFIER||||392|CG8854|protein_coding|CODING|FBtr0331944|1|1)]	-
FBgn0036775	3L_18102358_SNP	A	C	0.1404	24	147	7.71e-06	0.0947379	SiteClass[FBgn0036775|CG5147|SYNONYMOUS_CODING|0;FBgn0002901|mus304|UPSTREAM|556],TranscriptAnnot[SYNONYMOUS_CODING(LOW|SILENT|ctG/ctT|L45|415|CG5147|protein_coding|CODING|FBtr0075136|1|1);UPSTREAM(MODIFIER||556||846|mus304|protein_coding|CODING|FBtr0075122||1)]	This gene is referred to in FlyBase by the symbol Dmel\CG5147 (FBgn0036775). It is a protein_coding_gene from Drosophila melanogaster. It has one annotated transcript and one polypeptide. Gene sequence location is 3L:18107848..18109574. It has the cytological map location 75B9. Protein features are: DNA-directed RNA polymerase III subunit RPC4. Its molecular function is described by: DNA-directed…
FBgn0002901	3L_18102358_SNP	A	C	0.1404	24	147	7.71e-06	0.0947379	SiteClass[FBgn0036775|CG5147|SYNONYMOUS_CODING|0;FBgn0002901|mus304|UPSTREAM|556],TranscriptAnnot[SYNONYMOUS_CODING(LOW|SILENT|ctG/ctT|L45|415|CG5147|protein_coding|CODING|FBtr0075136|1|1);UPSTREAM(MODIFIER||556||846|mus304|protein_coding|CODING|FBtr0075122||1)]	The gene mutagen-sensitive 304 is referred to in FlyBase by the symbol Dmel\mus304 (CG7347, FBgn0002901). It is a protein_coding_gene from Drosophila melanogaster. It has one annotated transcript and one polypeptide. Gene sequence location is 3L:18109814..18112847. It has the cytological map location 75B9-75B10. Its molecular function is described by: ATP-dependent DNA helicase activity. It is in…
FBtr0075136	3L_18102358_SNP	A	C	0.1404	24	147	7.71e-06	0.0947379	SiteClass[FBgn0036775|CG5147|SYNONYMOUS_CODING|0;FBgn0002901|mus304|UPSTREAM|556],TranscriptAnnot[SYNONYMOUS_CODING(LOW|SILENT|ctG/ctT|L45|415|CG5147|protein_coding|CODING|FBtr0075136|1|1);UPSTREAM(MODIFIER||556||846|mus304|protein_coding|CODING|FBtr0075122||1)]	-
FBtr0075122	3L_18102358_SNP	A	C	0.1404	24	147	7.71e-06	0.0947379	SiteClass[FBgn0036775|CG5147|SYNONYMOUS_CODING|0;FBgn0002901|mus304|UPSTREAM|556],TranscriptAnnot[SYNONYMOUS_CODING(LOW|SILENT|ctG/ctT|L45|415|CG5147|protein_coding|CODING|FBtr0075136|1|1);UPSTREAM(MODIFIER||556||846|mus304|protein_coding|CODING|FBtr0075122||1)]	-
FBgn0033668	2R_7838913_SNP	C	A	0.06667	10	140	7.85e-06	0.0947379	SiteClass[FBgn0033668|CG13188|INTRON|0],TranscriptAnnot[INTRON(MODIFIER||||1025|CG13188|protein_coding|CODING|FBtr0088039|2|1);INTRON(MODIFIER||||513|CG13188|protein_coding|CODING|FBtr0088040|2|1)]	The gene expansion is referred to in FlyBase by the symbol Dmel\exp (CG13188, FBgn0033668). It is a protein_coding_gene from Drosophila melanogaster. It has 2 annotated transcripts and 2 polypeptides (all unique). Gene sequence location is 2R:11939557..11967435. It has the cytological map location 48D3-48D5. Protein features are: SMAD domain, Dwarfin-type; SMAD domain-like; SMAD/FHA domain. Its m…
FBtr0088039	2R_7838913_SNP	C	A	0.06667	10	140	7.85e-06	0.0947379	SiteClass[FBgn0033668|CG13188|INTRON|0],TranscriptAnnot[INTRON(MODIFIER||||1025|CG13188|protein_coding|CODING|FBtr0088039|2|1);INTRON(MODIFIER||||513|CG13188|protein_coding|CODING|FBtr0088040|2|1)]	-
FBtr0088040	2R_7838913_SNP	C	A	0.06667	10	140	7.85e-06	0.0947379	SiteClass[FBgn0033668|CG13188|INTRON|0],TranscriptAnnot[INTRON(MODIFIER||||1025|CG13188|protein_coding|CODING|FBtr0088039|2|1);INTRON(MODIFIER||||513|CG13188|protein_coding|CODING|FBtr0088040|2|1)]	-
FBgn0260658	X_3811254_SNP	A	G	0.05028	9	170	7.95e-06	0.0947379	SiteClass[FBgn0260658|CG42541|INTRON|0],TranscriptAnnot[INTRON(MODIFIER||||1418|CG42541|protein_coding|CODING|FBtr0301099|1|1);INTRON(MODIFIER||||1417|CG42541|protein_coding|CODING|FBtr0301100|1|1);INTRON(MODIFIER||||1417|CG42541|protein_coding|CODING|FBtr0332388|1|1);INTRON(MODIFIER||||1399|CG42541|protein_coding|CODING|FBtr0332389|1|1)]	This gene is referred to in FlyBase by the symbol Dmel\CG42541 (FBgn0260658). It is a protein_coding_gene from Drosophila melanogaster. It has 4 annotated transcripts and 4 polypeptides (all unique). Gene sequence location is X:3891497..3930578. It has the cytological map location 3F4-3F7. Protein features are: P-loop containing nucleoside triphosphate hydrolase; Small GTPase superfamily; Small G…
FBtr0301099	X_3811254_SNP	A	G	0.05028	9	170	7.95e-06	0.0947379	SiteClass[FBgn0260658|CG42541|INTRON|0],TranscriptAnnot[INTRON(MODIFIER||||1418|CG42541|protein_coding|CODING|FBtr0301099|1|1);INTRON(MODIFIER||||1417|CG42541|protein_coding|CODING|FBtr0301100|1|1);INTRON(MODIFIER||||1417|CG42541|protein_coding|CODING|FBtr0332388|1|1);INTRON(MODIFIER||||1399|CG42541|protein_coding|CODING|FBtr0332389|1|1)]	-
FBtr0301100	X_3811254_SNP	A	G	0.05028	9	170	7.95e-06	0.0947379	SiteClass[FBgn0260658|CG42541|INTRON|0],TranscriptAnnot[INTRON(MODIFIER||||1418|CG42541|protein_coding|CODING|FBtr0301099|1|1);INTRON(MODIFIER||||1417|CG42541|protein_coding|CODING|FBtr0301100|1|1);INTRON(MODIFIER||||1417|CG42541|protein_coding|CODING|FBtr0332388|1|1);INTRON(MODIFIER||||1399|CG42541|protein_coding|CODING|FBtr0332389|1|1)]	-
FBtr0332388	X_3811254_SNP	A	G	0.05028	9	170	7.95e-06	0.0947379	SiteClass[FBgn0260658|CG42541|INTRON|0],TranscriptAnnot[INTRON(MODIFIER||||1418|CG42541|protein_coding|CODING|FBtr0301099|1|1);INTRON(MODIFIER||||1417|CG42541|protein_coding|CODING|FBtr0301100|1|1);INTRON(MODIFIER||||1417|CG42541|protein_coding|CODING|FBtr0332388|1|1);INTRON(MODIFIER||||1399|CG42541|protein_coding|CODING|FBtr0332389|1|1)]	-
FBtr0332389	X_3811254_SNP	A	G	0.05028	9	170	7.95e-06	0.0947379	SiteClass[FBgn0260658|CG42541|INTRON|0],TranscriptAnnot[INTRON(MODIFIER||||1418|CG42541|protein_coding|CODING|FBtr0301099|1|1);INTRON(MODIFIER||||1417|CG42541|protein_coding|CODING|FBtr0301100|1|1);INTRON(MODIFIER||||1417|CG42541|protein_coding|CODING|FBtr0332388|1|1);INTRON(MODIFIER||||1399|CG42541|protein_coding|CODING|FBtr0332389|1|1)]	-
FBgn0260658	X_3812430_SNP	A	C	0.05028	9	170	7.95e-06	0.0947379	SiteClass[FBgn0260658|CG42541|INTRON|0],TranscriptAnnot[INTRON(MODIFIER||||1418|CG42541|protein_coding|CODING|FBtr0301099|1|1);INTRON(MODIFIER||||1417|CG42541|protein_coding|CODING|FBtr0301100|1|1);INTRON(MODIFIER||||1417|CG42541|protein_coding|CODING|FBtr0332388|1|1);INTRON(MODIFIER||||1399|CG42541|protein_coding|CODING|FBtr0332389|1|1)]	This gene is referred to in FlyBase by the symbol Dmel\CG42541 (FBgn0260658). It is a protein_coding_gene from Drosophila melanogaster. It has 4 annotated transcripts and 4 polypeptides (all unique). Gene sequence location is X:3891497..3930578. It has the cytological map location 3F4-3F7. Protein features are: P-loop containing nucleoside triphosphate hydrolase; Small GTPase superfamily; Small G…
FBtr0301099	X_3812430_SNP	A	C	0.05028	9	170	7.95e-06	0.0947379	SiteClass[FBgn0260658|CG42541|INTRON|0],TranscriptAnnot[INTRON(MODIFIER||||1418|CG42541|protein_coding|CODING|FBtr0301099|1|1);INTRON(MODIFIER||||1417|CG42541|protein_coding|CODING|FBtr0301100|1|1);INTRON(MODIFIER||||1417|CG42541|protein_coding|CODING|FBtr0332388|1|1);INTRON(MODIFIER||||1399|CG42541|protein_coding|CODING|FBtr0332389|1|1)]	-
FBtr0301100	X_3812430_SNP	A	C	0.05028	9	170	7.95e-06	0.0947379	SiteClass[FBgn0260658|CG42541|INTRON|0],TranscriptAnnot[INTRON(MODIFIER||||1418|CG42541|protein_coding|CODING|FBtr0301099|1|1);INTRON(MODIFIER||||1417|CG42541|protein_coding|CODING|FBtr0301100|1|1);INTRON(MODIFIER||||1417|CG42541|protein_coding|CODING|FBtr0332388|1|1);INTRON(MODIFIER||||1399|CG42541|protein_coding|CODING|FBtr0332389|1|1)]	-
FBtr0332388	X_3812430_SNP	A	C	0.05028	9	170	7.95e-06	0.0947379	SiteClass[FBgn0260658|CG42541|INTRON|0],TranscriptAnnot[INTRON(MODIFIER||||1418|CG42541|protein_coding|CODING|FBtr0301099|1|1);INTRON(MODIFIER||||1417|CG42541|protein_coding|CODING|FBtr0301100|1|1);INTRON(MODIFIER||||1417|CG42541|protein_coding|CODING|FBtr0332388|1|1);INTRON(MODIFIER||||1399|CG42541|protein_coding|CODING|FBtr0332389|1|1)]	-
FBtr0332389	X_3812430_SNP	A	C	0.05028	9	170	7.95e-06	0.0947379	SiteClass[FBgn0260658|CG42541|INTRON|0],TranscriptAnnot[INTRON(MODIFIER||||1418|CG42541|protein_coding|CODING|FBtr0301099|1|1);INTRON(MODIFIER||||1417|CG42541|protein_coding|CODING|FBtr0301100|1|1);INTRON(MODIFIER||||1417|CG42541|protein_coding|CODING|FBtr0332388|1|1);INTRON(MODIFIER||||1399|CG42541|protein_coding|CODING|FBtr0332389|1|1)]	-
FBgn0033702	2R_8115894_INS	A	ATTCA	0.269	46	125	7.98e-06	0.0947379	SiteClass[FBgn0033702|CG8854|INTRON|0],TranscriptAnnot[INTRON(MODIFIER||||392|CG8854|protein_coding|CODING|FBtr0331944|1|1)]	This gene is referred to in FlyBase by the symbol Dmel\CG8854 (FBgn0033702). It is a protein_coding_gene from Drosophila melanogaster. It has 2 annotated transcripts and 2 polypeptides (1 unique). Gene sequence location is 2R:12224461..12229310. It has the cytological map location 48E10. Its molecular function is described by: . It is involved in the biological process described with: . One allel…
FBtr0331944	2R_8115894_INS	A	ATTCA	0.269	46	125	7.98e-06	0.0947379	SiteClass[FBgn0033702|CG8854|INTRON|0],TranscriptAnnot[INTRON(MODIFIER||||392|CG8854|protein_coding|CODING|FBtr0331944|1|1)]	-
FBgn0263289	3R_22376971_SNP	A	C	0.05114	9	167	8.05e-06	0.0947379	SiteClass[FBgn0263289|scrib|INTRON|0],TranscriptAnnot[INTRON(MODIFIER||||1756|scrib|protein_coding|CODING|FBtr0308620|3|1);INTRON(MODIFIER||||1756|scrib|protein_coding|CODING|FBtr0308621|3|1);INTRON(MODIFIER||||1939|scrib|protein_coding|CODING|FBtr0308622|3|1);INTRON(MODIFIER||||1711|scrib|protein_coding|CODING|FBtr0308623|3|1);INTRON(MODIFIER||||1247|scrib|protein_coding|CODING|FBtr0308624|3|1);…	The gene scribbled is referred to in FlyBase by the symbol Dmel\scrib (CG43398, FBgn0263289). It is a protein_coding_gene from Drosophila melanogaster. It has 18 annotated transcripts and 18 polypeptides (17 unique). Gene sequence location is 3R:26536350..26604051. It has the cytological map location 97B9-97C1. Protein features are: Leucine-rich repeat; Leucine-rich repeat domain, L domain-like; …
FBtr0308620	3R_22376971_SNP	A	C	0.05114	9	167	8.05e-06	0.0947379	SiteClass[FBgn0263289|scrib|INTRON|0],TranscriptAnnot[INTRON(MODIFIER||||1756|scrib|protein_coding|CODING|FBtr0308620|3|1);INTRON(MODIFIER||||1756|scrib|protein_coding|CODING|FBtr0308621|3|1);INTRON(MODIFIER||||1939|scrib|protein_coding|CODING|FBtr0308622|3|1);INTRON(MODIFIER||||1711|scrib|protein_coding|CODING|FBtr0308623|3|1);INTRON(MODIFIER||||1247|scrib|protein_coding|CODING|FBtr0308624|3|1);…	-
FBtr0308621	3R_22376971_SNP	A	C	0.05114	9	167	8.05e-06	0.0947379	SiteClass[FBgn0263289|scrib|INTRON|0],TranscriptAnnot[INTRON(MODIFIER||||1756|scrib|protein_coding|CODING|FBtr0308620|3|1);INTRON(MODIFIER||||1756|scrib|protein_coding|CODING|FBtr0308621|3|1);INTRON(MODIFIER||||1939|scrib|protein_coding|CODING|FBtr0308622|3|1);INTRON(MODIFIER||||1711|scrib|protein_coding|CODING|FBtr0308623|3|1);INTRON(MODIFIER||||1247|scrib|protein_coding|CODING|FBtr0308624|3|1);…	-
FBtr0308622	3R_22376971_SNP	A	C	0.05114	9	167	8.05e-06	0.0947379	SiteClass[FBgn0263289|scrib|INTRON|0],TranscriptAnnot[INTRON(MODIFIER||||1756|scrib|protein_coding|CODING|FBtr0308620|3|1);INTRON(MODIFIER||||1756|scrib|protein_coding|CODING|FBtr0308621|3|1);INTRON(MODIFIER||||1939|scrib|protein_coding|CODING|FBtr0308622|3|1);INTRON(MODIFIER||||1711|scrib|protein_coding|CODING|FBtr0308623|3|1);INTRON(MODIFIER||||1247|scrib|protein_coding|CODING|FBtr0308624|3|1);…	-
FBtr0308623	3R_22376971_SNP	A	C	0.05114	9	167	8.05e-06	0.0947379	SiteClass[FBgn0263289|scrib|INTRON|0],TranscriptAnnot[INTRON(MODIFIER||||1756|scrib|protein_coding|CODING|FBtr0308620|3|1);INTRON(MODIFIER||||1756|scrib|protein_coding|CODING|FBtr0308621|3|1);INTRON(MODIFIER||||1939|scrib|protein_coding|CODING|FBtr0308622|3|1);INTRON(MODIFIER||||1711|scrib|protein_coding|CODING|FBtr0308623|3|1);INTRON(MODIFIER||||1247|scrib|protein_coding|CODING|FBtr0308624|3|1);…	-
FBtr0308624	3R_22376971_SNP	A	C	0.05114	9	167	8.05e-06	0.0947379	SiteClass[FBgn0263289|scrib|INTRON|0],TranscriptAnnot[INTRON(MODIFIER||||1756|scrib|protein_coding|CODING|FBtr0308620|3|1);INTRON(MODIFIER||||1756|scrib|protein_coding|CODING|FBtr0308621|3|1);INTRON(MODIFIER||||1939|scrib|protein_coding|CODING|FBtr0308622|3|1);INTRON(MODIFIER||||1711|scrib|protein_coding|CODING|FBtr0308623|3|1);INTRON(MODIFIER||||1247|scrib|protein_coding|CODING|FBtr0308624|3|1);…	-
FBtr0308625	3R_22376971_SNP	A	C	0.05114	9	167	8.05e-06	0.0947379	SiteClass[FBgn0263289|scrib|INTRON|0],TranscriptAnnot[INTRON(MODIFIER||||1756|scrib|protein_coding|CODING|FBtr0308620|3|1);INTRON(MODIFIER||||1756|scrib|protein_coding|CODING|FBtr0308621|3|1);INTRON(MODIFIER||||1939|scrib|protein_coding|CODING|FBtr0308622|3|1);INTRON(MODIFIER||||1711|scrib|protein_coding|CODING|FBtr0308623|3|1);INTRON(MODIFIER||||1247|scrib|protein_coding|CODING|FBtr0308624|3|1);…	-
FBtr0308626	3R_22376971_SNP	A	C	0.05114	9	167	8.05e-06	0.0947379	SiteClass[FBgn0263289|scrib|INTRON|0],TranscriptAnnot[INTRON(MODIFIER||||1756|scrib|protein_coding|CODING|FBtr0308620|3|1);INTRON(MODIFIER||||1756|scrib|protein_coding|CODING|FBtr0308621|3|1);INTRON(MODIFIER||||1939|scrib|protein_coding|CODING|FBtr0308622|3|1);INTRON(MODIFIER||||1711|scrib|protein_coding|CODING|FBtr0308623|3|1);INTRON(MODIFIER||||1247|scrib|protein_coding|CODING|FBtr0308624|3|1);…	-
FBtr0308627	3R_22376971_SNP	A	C	0.05114	9	167	8.05e-06	0.0947379	SiteClass[FBgn0263289|scrib|INTRON|0],TranscriptAnnot[INTRON(MODIFIER||||1756|scrib|protein_coding|CODING|FBtr0308620|3|1);INTRON(MODIFIER||||1756|scrib|protein_coding|CODING|FBtr0308621|3|1);INTRON(MODIFIER||||1939|scrib|protein_coding|CODING|FBtr0308622|3|1);INTRON(MODIFIER||||1711|scrib|protein_coding|CODING|FBtr0308623|3|1);INTRON(MODIFIER||||1247|scrib|protein_coding|CODING|FBtr0308624|3|1);…	-
FBtr0308628	3R_22376971_SNP	A	C	0.05114	9	167	8.05e-06	0.0947379	SiteClass[FBgn0263289|scrib|INTRON|0],TranscriptAnnot[INTRON(MODIFIER||||1756|scrib|protein_coding|CODING|FBtr0308620|3|1);INTRON(MODIFIER||||1756|scrib|protein_coding|CODING|FBtr0308621|3|1);INTRON(MODIFIER||||1939|scrib|protein_coding|CODING|FBtr0308622|3|1);INTRON(MODIFIER||||1711|scrib|protein_coding|CODING|FBtr0308623|3|1);INTRON(MODIFIER||||1247|scrib|protein_coding|CODING|FBtr0308624|3|1);…	-
FBtr0308629	3R_22376971_SNP	A	C	0.05114	9	167	8.05e-06	0.0947379	SiteClass[FBgn0263289|scrib|INTRON|0],TranscriptAnnot[INTRON(MODIFIER||||1756|scrib|protein_coding|CODING|FBtr0308620|3|1);INTRON(MODIFIER||||1756|scrib|protein_coding|CODING|FBtr0308621|3|1);INTRON(MODIFIER||||1939|scrib|protein_coding|CODING|FBtr0308622|3|1);INTRON(MODIFIER||||1711|scrib|protein_coding|CODING|FBtr0308623|3|1);INTRON(MODIFIER||||1247|scrib|protein_coding|CODING|FBtr0308624|3|1);…	-
FBtr0308630	3R_22376971_SNP	A	C	0.05114	9	167	8.05e-06	0.0947379	SiteClass[FBgn0263289|scrib|INTRON|0],TranscriptAnnot[INTRON(MODIFIER||||1756|scrib|protein_coding|CODING|FBtr0308620|3|1);INTRON(MODIFIER||||1756|scrib|protein_coding|CODING|FBtr0308621|3|1);INTRON(MODIFIER||||1939|scrib|protein_coding|CODING|FBtr0308622|3|1);INTRON(MODIFIER||||1711|scrib|protein_coding|CODING|FBtr0308623|3|1);INTRON(MODIFIER||||1247|scrib|protein_coding|CODING|FBtr0308624|3|1);…	-
FBtr0308631	3R_22376971_SNP	A	C	0.05114	9	167	8.05e-06	0.0947379	SiteClass[FBgn0263289|scrib|INTRON|0],TranscriptAnnot[INTRON(MODIFIER||||1756|scrib|protein_coding|CODING|FBtr0308620|3|1);INTRON(MODIFIER||||1756|scrib|protein_coding|CODING|FBtr0308621|3|1);INTRON(MODIFIER||||1939|scrib|protein_coding|CODING|FBtr0308622|3|1);INTRON(MODIFIER||||1711|scrib|protein_coding|CODING|FBtr0308623|3|1);INTRON(MODIFIER||||1247|scrib|protein_coding|CODING|FBtr0308624|3|1);…	-
FBtr0308632	3R_22376971_SNP	A	C	0.05114	9	167	8.05e-06	0.0947379	SiteClass[FBgn0263289|scrib|INTRON|0],TranscriptAnnot[INTRON(MODIFIER||||1756|scrib|protein_coding|CODING|FBtr0308620|3|1);INTRON(MODIFIER||||1756|scrib|protein_coding|CODING|FBtr0308621|3|1);INTRON(MODIFIER||||1939|scrib|protein_coding|CODING|FBtr0308622|3|1);INTRON(MODIFIER||||1711|scrib|protein_coding|CODING|FBtr0308623|3|1);INTRON(MODIFIER||||1247|scrib|protein_coding|CODING|FBtr0308624|3|1);…	-
FBtr0308633	3R_22376971_SNP	A	C	0.05114	9	167	8.05e-06	0.0947379	SiteClass[FBgn0263289|scrib|INTRON|0],TranscriptAnnot[INTRON(MODIFIER||||1756|scrib|protein_coding|CODING|FBtr0308620|3|1);INTRON(MODIFIER||||1756|scrib|protein_coding|CODING|FBtr0308621|3|1);INTRON(MODIFIER||||1939|scrib|protein_coding|CODING|FBtr0308622|3|1);INTRON(MODIFIER||||1711|scrib|protein_coding|CODING|FBtr0308623|3|1);INTRON(MODIFIER||||1247|scrib|protein_coding|CODING|FBtr0308624|3|1);…	-
FBtr0308634	3R_22376971_SNP	A	C	0.05114	9	167	8.05e-06	0.0947379	SiteClass[FBgn0263289|scrib|INTRON|0],TranscriptAnnot[INTRON(MODIFIER||||1756|scrib|protein_coding|CODING|FBtr0308620|3|1);INTRON(MODIFIER||||1756|scrib|protein_coding|CODING|FBtr0308621|3|1);INTRON(MODIFIER||||1939|scrib|protein_coding|CODING|FBtr0308622|3|1);INTRON(MODIFIER||||1711|scrib|protein_coding|CODING|FBtr0308623|3|1);INTRON(MODIFIER||||1247|scrib|protein_coding|CODING|FBtr0308624|3|1);…	-
FBtr0335521	3R_22376971_SNP	A	C	0.05114	9	167	8.05e-06	0.0947379	SiteClass[FBgn0263289|scrib|INTRON|0],TranscriptAnnot[INTRON(MODIFIER||||1756|scrib|protein_coding|CODING|FBtr0308620|3|1);INTRON(MODIFIER||||1756|scrib|protein_coding|CODING|FBtr0308621|3|1);INTRON(MODIFIER||||1939|scrib|protein_coding|CODING|FBtr0308622|3|1);INTRON(MODIFIER||||1711|scrib|protein_coding|CODING|FBtr0308623|3|1);INTRON(MODIFIER||||1247|scrib|protein_coding|CODING|FBtr0308624|3|1);…	-
FBtr0335522	3R_22376971_SNP	A	C	0.05114	9	167	8.05e-06	0.0947379	SiteClass[FBgn0263289|scrib|INTRON|0],TranscriptAnnot[INTRON(MODIFIER||||1756|scrib|protein_coding|CODING|FBtr0308620|3|1);INTRON(MODIFIER||||1756|scrib|protein_coding|CODING|FBtr0308621|3|1);INTRON(MODIFIER||||1939|scrib|protein_coding|CODING|FBtr0308622|3|1);INTRON(MODIFIER||||1711|scrib|protein_coding|CODING|FBtr0308623|3|1);INTRON(MODIFIER||||1247|scrib|protein_coding|CODING|FBtr0308624|3|1);…	-
FBgn0260642	3R_2740508_SNP	T	G	0.07018	12	159	8.06e-06	0.0947379	SiteClass[FBgn0260642|Antp|INTRON|0],TranscriptAnnot[INTRON(MODIFIER||||297|Antp|protein_coding|CODING|FBtr0081646|1|1);INTRON(MODIFIER||||374|Antp|protein_coding|CODING|FBtr0081648|1|1);INTRON(MODIFIER||||378|Antp|protein_coding|CODING|FBtr0081652|1|1);INTRON(MODIFIER||||365|Antp|protein_coding|CODING|FBtr0081653|1|1);INTRON(MODIFIER||||378|Antp|protein_coding|CODING|FBtr0081655|1|1);INTRON(MODI…	The gene Antennapedia is referred to in FlyBase by the symbol Dmel\Antp (CG1028, FBgn0260642). It is a protein_coding_gene from Drosophila melanogaster. It has 11 annotated transcripts and 11 polypeptides (5 unique). Gene sequence location is 3R:6896253..6999228. It has the cytological map location 84A6-84B2. Protein features are: Homeobox domain; Homeobox protein, antennapedia type; Homeobox pro…
FBtr0081646	3R_2740508_SNP	T	G	0.07018	12	159	8.06e-06	0.0947379	SiteClass[FBgn0260642|Antp|INTRON|0],TranscriptAnnot[INTRON(MODIFIER||||297|Antp|protein_coding|CODING|FBtr0081646|1|1);INTRON(MODIFIER||||374|Antp|protein_coding|CODING|FBtr0081648|1|1);INTRON(MODIFIER||||378|Antp|protein_coding|CODING|FBtr0081652|1|1);INTRON(MODIFIER||||365|Antp|protein_coding|CODING|FBtr0081653|1|1);INTRON(MODIFIER||||378|Antp|protein_coding|CODING|FBtr0081655|1|1);INTRON(MODI…	-
FBtr0081648	3R_2740508_SNP	T	G	0.07018	12	159	8.06e-06	0.0947379	SiteClass[FBgn0260642|Antp|INTRON|0],TranscriptAnnot[INTRON(MODIFIER||||297|Antp|protein_coding|CODING|FBtr0081646|1|1);INTRON(MODIFIER||||374|Antp|protein_coding|CODING|FBtr0081648|1|1);INTRON(MODIFIER||||378|Antp|protein_coding|CODING|FBtr0081652|1|1);INTRON(MODIFIER||||365|Antp|protein_coding|CODING|FBtr0081653|1|1);INTRON(MODIFIER||||378|Antp|protein_coding|CODING|FBtr0081655|1|1);INTRON(MODI…	-
FBtr0081652	3R_2740508_SNP	T	G	0.07018	12	159	8.06e-06	0.0947379	SiteClass[FBgn0260642|Antp|INTRON|0],TranscriptAnnot[INTRON(MODIFIER||||297|Antp|protein_coding|CODING|FBtr0081646|1|1);INTRON(MODIFIER||||374|Antp|protein_coding|CODING|FBtr0081648|1|1);INTRON(MODIFIER||||378|Antp|protein_coding|CODING|FBtr0081652|1|1);INTRON(MODIFIER||||365|Antp|protein_coding|CODING|FBtr0081653|1|1);INTRON(MODIFIER||||378|Antp|protein_coding|CODING|FBtr0081655|1|1);INTRON(MODI…	-
FBtr0081653	3R_2740508_SNP	T	G	0.07018	12	159	8.06e-06	0.0947379	SiteClass[FBgn0260642|Antp|INTRON|0],TranscriptAnnot[INTRON(MODIFIER||||297|Antp|protein_coding|CODING|FBtr0081646|1|1);INTRON(MODIFIER||||374|Antp|protein_coding|CODING|FBtr0081648|1|1);INTRON(MODIFIER||||378|Antp|protein_coding|CODING|FBtr0081652|1|1);INTRON(MODIFIER||||365|Antp|protein_coding|CODING|FBtr0081653|1|1);INTRON(MODIFIER||||378|Antp|protein_coding|CODING|FBtr0081655|1|1);INTRON(MODI…	-
FBtr0081655	3R_2740508_SNP	T	G	0.07018	12	159	8.06e-06	0.0947379	SiteClass[FBgn0260642|Antp|INTRON|0],TranscriptAnnot[INTRON(MODIFIER||||297|Antp|protein_coding|CODING|FBtr0081646|1|1);INTRON(MODIFIER||||374|Antp|protein_coding|CODING|FBtr0081648|1|1);INTRON(MODIFIER||||378|Antp|protein_coding|CODING|FBtr0081652|1|1);INTRON(MODIFIER||||365|Antp|protein_coding|CODING|FBtr0081653|1|1);INTRON(MODIFIER||||378|Antp|protein_coding|CODING|FBtr0081655|1|1);INTRON(MODI…	-
FBtr0081656	3R_2740508_SNP	T	G	0.07018	12	159	8.06e-06	0.0947379	SiteClass[FBgn0260642|Antp|INTRON|0],TranscriptAnnot[INTRON(MODIFIER||||297|Antp|protein_coding|CODING|FBtr0081646|1|1);INTRON(MODIFIER||||374|Antp|protein_coding|CODING|FBtr0081648|1|1);INTRON(MODIFIER||||378|Antp|protein_coding|CODING|FBtr0081652|1|1);INTRON(MODIFIER||||365|Antp|protein_coding|CODING|FBtr0081653|1|1);INTRON(MODIFIER||||378|Antp|protein_coding|CODING|FBtr0081655|1|1);INTRON(MODI…	-
FBtr0081647	3R_2740508_SNP	T	G	0.07018	12	159	8.06e-06	0.0947379	SiteClass[FBgn0260642|Antp|INTRON|0],TranscriptAnnot[INTRON(MODIFIER||||297|Antp|protein_coding|CODING|FBtr0081646|1|1);INTRON(MODIFIER||||374|Antp|protein_coding|CODING|FBtr0081648|1|1);INTRON(MODIFIER||||378|Antp|protein_coding|CODING|FBtr0081652|1|1);INTRON(MODIFIER||||365|Antp|protein_coding|CODING|FBtr0081653|1|1);INTRON(MODIFIER||||378|Antp|protein_coding|CODING|FBtr0081655|1|1);INTRON(MODI…	-
FBtr0081649	3R_2740508_SNP	T	G	0.07018	12	159	8.06e-06	0.0947379	SiteClass[FBgn0260642|Antp|INTRON|0],TranscriptAnnot[INTRON(MODIFIER||||297|Antp|protein_coding|CODING|FBtr0081646|1|1);INTRON(MODIFIER||||374|Antp|protein_coding|CODING|FBtr0081648|1|1);INTRON(MODIFIER||||378|Antp|protein_coding|CODING|FBtr0081652|1|1);INTRON(MODIFIER||||365|Antp|protein_coding|CODING|FBtr0081653|1|1);INTRON(MODIFIER||||378|Antp|protein_coding|CODING|FBtr0081655|1|1);INTRON(MODI…	-
FBtr0081650	3R_2740508_SNP	T	G	0.07018	12	159	8.06e-06	0.0947379	SiteClass[FBgn0260642|Antp|INTRON|0],TranscriptAnnot[INTRON(MODIFIER||||297|Antp|protein_coding|CODING|FBtr0081646|1|1);INTRON(MODIFIER||||374|Antp|protein_coding|CODING|FBtr0081648|1|1);INTRON(MODIFIER||||378|Antp|protein_coding|CODING|FBtr0081652|1|1);INTRON(MODIFIER||||365|Antp|protein_coding|CODING|FBtr0081653|1|1);INTRON(MODIFIER||||378|Antp|protein_coding|CODING|FBtr0081655|1|1);INTRON(MODI…	-
FBtr0081651	3R_2740508_SNP	T	G	0.07018	12	159	8.06e-06	0.0947379	SiteClass[FBgn0260642|Antp|INTRON|0],TranscriptAnnot[INTRON(MODIFIER||||297|Antp|protein_coding|CODING|FBtr0081646|1|1);INTRON(MODIFIER||||374|Antp|protein_coding|CODING|FBtr0081648|1|1);INTRON(MODIFIER||||378|Antp|protein_coding|CODING|FBtr0081652|1|1);INTRON(MODIFIER||||365|Antp|protein_coding|CODING|FBtr0081653|1|1);INTRON(MODIFIER||||378|Antp|protein_coding|CODING|FBtr0081655|1|1);INTRON(MODI…	-
FBtr0081654	3R_2740508_SNP	T	G	0.07018	12	159	8.06e-06	0.0947379	SiteClass[FBgn0260642|Antp|INTRON|0],TranscriptAnnot[INTRON(MODIFIER||||297|Antp|protein_coding|CODING|FBtr0081646|1|1);INTRON(MODIFIER||||374|Antp|protein_coding|CODING|FBtr0081648|1|1);INTRON(MODIFIER||||378|Antp|protein_coding|CODING|FBtr0081652|1|1);INTRON(MODIFIER||||365|Antp|protein_coding|CODING|FBtr0081653|1|1);INTRON(MODIFIER||||378|Antp|protein_coding|CODING|FBtr0081655|1|1);INTRON(MODI…	-
FBgn0261260	X_9277214_SNP	T	A	0.05618	10	168	8.22e-06	0.0956668	SiteClass[FBgn0261260|mgl|INTRON|0],TranscriptAnnot[INTRON(MODIFIER||||4769|mgl|protein_coding|CODING|FBtr0302153|3|1);INTRON(MODIFIER||||4769|mgl|protein_coding|CODING|FBtr0343369|3|1);INTRON(MODIFIER||||4769|mgl|protein_coding|CODING|FBtr0343370|3|1);INTRON(MODIFIER||||4769|mgl|protein_coding|CODING|FBtr0343371|3|1)]	The gene Megalin is referred to in FlyBase by the symbol Dmel\mgl (CG42611, FBgn0261260). It is a protein_coding_gene from Drosophila melanogaster. It has 4 annotated transcripts and 4 polypeptides (1 unique). Gene sequence location is X:9358496..9500129. It has the cytological map location 8D10. Protein features are: Complement Clr-like EGF domain; EGF-like calcium-binding domain; EGF-like calci…
FBtr0302153	X_9277214_SNP	T	A	0.05618	10	168	8.22e-06	0.0956668	SiteClass[FBgn0261260|mgl|INTRON|0],TranscriptAnnot[INTRON(MODIFIER||||4769|mgl|protein_coding|CODING|FBtr0302153|3|1);INTRON(MODIFIER||||4769|mgl|protein_coding|CODING|FBtr0343369|3|1);INTRON(MODIFIER||||4769|mgl|protein_coding|CODING|FBtr0343370|3|1);INTRON(MODIFIER||||4769|mgl|protein_coding|CODING|FBtr0343371|3|1)]	-
FBtr0343369	X_9277214_SNP	T	A	0.05618	10	168	8.22e-06	0.0956668	SiteClass[FBgn0261260|mgl|INTRON|0],TranscriptAnnot[INTRON(MODIFIER||||4769|mgl|protein_coding|CODING|FBtr0302153|3|1);INTRON(MODIFIER||||4769|mgl|protein_coding|CODING|FBtr0343369|3|1);INTRON(MODIFIER||||4769|mgl|protein_coding|CODING|FBtr0343370|3|1);INTRON(MODIFIER||||4769|mgl|protein_coding|CODING|FBtr0343371|3|1)]	-
FBtr0343370	X_9277214_SNP	T	A	0.05618	10	168	8.22e-06	0.0956668	SiteClass[FBgn0261260|mgl|INTRON|0],TranscriptAnnot[INTRON(MODIFIER||||4769|mgl|protein_coding|CODING|FBtr0302153|3|1);INTRON(MODIFIER||||4769|mgl|protein_coding|CODING|FBtr0343369|3|1);INTRON(MODIFIER||||4769|mgl|protein_coding|CODING|FBtr0343370|3|1);INTRON(MODIFIER||||4769|mgl|protein_coding|CODING|FBtr0343371|3|1)]	-
FBtr0343371	X_9277214_SNP	T	A	0.05618	10	168	8.22e-06	0.0956668	SiteClass[FBgn0261260|mgl|INTRON|0],TranscriptAnnot[INTRON(MODIFIER||||4769|mgl|protein_coding|CODING|FBtr0302153|3|1);INTRON(MODIFIER||||4769|mgl|protein_coding|CODING|FBtr0343369|3|1);INTRON(MODIFIER||||4769|mgl|protein_coding|CODING|FBtr0343370|3|1);INTRON(MODIFIER||||4769|mgl|protein_coding|CODING|FBtr0343371|3|1)]	-
FBgn0034718	2R_18192965_SNP	T	C	0.1023	18	158	8.24e-06	0.0956668	SiteClass[FBgn0034718|wdp|INTRON|0],TranscriptAnnot[INTRON(MODIFIER||||677|wdp|protein_coding|CODING|FBtr0071849|2|1);INTRON(MODIFIER||||677|wdp|protein_coding|CODING|FBtr0071851|2|1);INTRON(MODIFIER||||677|wdp|protein_coding|CODING|FBtr0071852|2|1);INTRON(MODIFIER||||677|wdp|protein_coding|CODING|FBtr0071850|1|1)]	The gene windpipe is referred to in FlyBase by the symbol Dmel\wdp (CG3413, FBgn0034718). It is a protein_coding_gene from Drosophila melanogaster. It has 5 annotated transcripts and 5 polypeptides (1 unique). Gene sequence location is 2R:22298214..22311937. It has the cytological map location 58D3. Protein features are: Cysteine-rich flanking region, C-terminal; Leucine-rich repeat; Leucine-rich…
FBtr0071849	2R_18192965_SNP	T	C	0.1023	18	158	8.24e-06	0.0956668	SiteClass[FBgn0034718|wdp|INTRON|0],TranscriptAnnot[INTRON(MODIFIER||||677|wdp|protein_coding|CODING|FBtr0071849|2|1);INTRON(MODIFIER||||677|wdp|protein_coding|CODING|FBtr0071851|2|1);INTRON(MODIFIER||||677|wdp|protein_coding|CODING|FBtr0071852|2|1);INTRON(MODIFIER||||677|wdp|protein_coding|CODING|FBtr0071850|1|1)]	-
FBtr0071851	2R_18192965_SNP	T	C	0.1023	18	158	8.24e-06	0.0956668	SiteClass[FBgn0034718|wdp|INTRON|0],TranscriptAnnot[INTRON(MODIFIER||||677|wdp|protein_coding|CODING|FBtr0071849|2|1);INTRON(MODIFIER||||677|wdp|protein_coding|CODING|FBtr0071851|2|1);INTRON(MODIFIER||||677|wdp|protein_coding|CODING|FBtr0071852|2|1);INTRON(MODIFIER||||677|wdp|protein_coding|CODING|FBtr0071850|1|1)]	-
FBtr0071852	2R_18192965_SNP	T	C	0.1023	18	158	8.24e-06	0.0956668	SiteClass[FBgn0034718|wdp|INTRON|0],TranscriptAnnot[INTRON(MODIFIER||||677|wdp|protein_coding|CODING|FBtr0071849|2|1);INTRON(MODIFIER||||677|wdp|protein_coding|CODING|FBtr0071851|2|1);INTRON(MODIFIER||||677|wdp|protein_coding|CODING|FBtr0071852|2|1);INTRON(MODIFIER||||677|wdp|protein_coding|CODING|FBtr0071850|1|1)]	-
FBtr0071850	2R_18192965_SNP	T	C	0.1023	18	158	8.24e-06	0.0956668	SiteClass[FBgn0034718|wdp|INTRON|0],TranscriptAnnot[INTRON(MODIFIER||||677|wdp|protein_coding|CODING|FBtr0071849|2|1);INTRON(MODIFIER||||677|wdp|protein_coding|CODING|FBtr0071851|2|1);INTRON(MODIFIER||||677|wdp|protein_coding|CODING|FBtr0071852|2|1);INTRON(MODIFIER||||677|wdp|protein_coding|CODING|FBtr0071850|1|1)]	-
FBgn0036773	3L_18098016_SNP	C	G	0.1235	21	149	8.49e-06	0.0968458	SiteClass[FBgn0036773|CG13698|INTRON|0],TranscriptAnnot[INTRON(MODIFIER||||316|CG13698|protein_coding|CODING|FBtr0333698|1|1);INTRON(MODIFIER||||316|CG13698|protein_coding|CODING|FBtr0075137|1|1)]	This gene is referred to in FlyBase by the symbol Dmel\CG13698 (FBgn0036773). It is a protein_coding_gene from Drosophila melanogaster. It has 2 annotated transcripts and 2 polypeptides (1 unique). Gene sequence location is 3L:18088417..18106149. It has the cytological map location 75B7-75B9. Its molecular function is unknown. The biological processes in which it is involved are not known. 12 all…
FBtr0333698	3L_18098016_SNP	C	G	0.1235	21	149	8.49e-06	0.0968458	SiteClass[FBgn0036773|CG13698|INTRON|0],TranscriptAnnot[INTRON(MODIFIER||||316|CG13698|protein_coding|CODING|FBtr0333698|1|1);INTRON(MODIFIER||||316|CG13698|protein_coding|CODING|FBtr0075137|1|1)]	-
FBtr0075137	3L_18098016_SNP	C	G	0.1235	21	149	8.49e-06	0.0968458	SiteClass[FBgn0036773|CG13698|INTRON|0],TranscriptAnnot[INTRON(MODIFIER||||316|CG13698|protein_coding|CODING|FBtr0333698|1|1);INTRON(MODIFIER||||316|CG13698|protein_coding|CODING|FBtr0075137|1|1)]	-
FBgn0261704	3R_26246771_SNP	A	T	0.1954	34	140	8.53e-06	0.0968458	SiteClass[FBgn0261704|CG42740|INTRON|0;FBgn0027544|CG2217|DOWNSTREAM|155],TranscriptAnnot[UTR_5_PRIME(MODIFIER||1817||51|CG42740|protein_coding|CODING|FBtr0303201|2|1);UTR_5_PRIME(MODIFIER||1817||51|CG42740|protein_coding|CODING|FBtr0303202|1|1);UTR_3_PRIME(MODIFIER||442||364|CG2217|protein_coding|CODING|FBtr0085630|2|1);UTR_3_PRIME(MODIFIER||442||364|CG2217|protein_coding|CODING|FBtr0303200|1|1)…	This gene is referred to in FlyBase by the symbol Dmel\CG42740 (FBgn0261704). It is a protein_coding_gene from Drosophila melanogaster. It has 3 annotated transcripts and 3 polypeptides (1 unique). Gene sequence location is 3R:30418767..30422971. It has the cytological map location 99F3-99F4. Its molecular function is described by: . It is involved in the biological process described with: . One …
FBgn0027544	3R_26246771_SNP	A	T	0.1954	34	140	8.53e-06	0.0968458	SiteClass[FBgn0261704|CG42740|INTRON|0;FBgn0027544|CG2217|DOWNSTREAM|155],TranscriptAnnot[UTR_5_PRIME(MODIFIER||1817||51|CG42740|protein_coding|CODING|FBtr0303201|2|1);UTR_5_PRIME(MODIFIER||1817||51|CG42740|protein_coding|CODING|FBtr0303202|1|1);UTR_3_PRIME(MODIFIER||442||364|CG2217|protein_coding|CODING|FBtr0085630|2|1);UTR_3_PRIME(MODIFIER||442||364|CG2217|protein_coding|CODING|FBtr0303200|1|1)…	This gene is referred to in FlyBase by the symbol Dmel\CG2217 (FBgn0027544). It is a protein_coding_gene from Drosophila melanogaster. It has 4 annotated transcripts and 4 polypeptides (1 unique). Gene sequence location is 3R:30418767..30422971. It has the cytological map location 99F3-99F4. Protein features are: Domain of unknown function DUF4780. Its molecular function is unknown. The biologica…
FBtr0303201	3R_26246771_SNP	A	T	0.1954	34	140	8.53e-06	0.0968458	SiteClass[FBgn0261704|CG42740|INTRON|0;FBgn0027544|CG2217|DOWNSTREAM|155],TranscriptAnnot[UTR_5_PRIME(MODIFIER||1817||51|CG42740|protein_coding|CODING|FBtr0303201|2|1);UTR_5_PRIME(MODIFIER||1817||51|CG42740|protein_coding|CODING|FBtr0303202|1|1);UTR_3_PRIME(MODIFIER||442||364|CG2217|protein_coding|CODING|FBtr0085630|2|1);UTR_3_PRIME(MODIFIER||442||364|CG2217|protein_coding|CODING|FBtr0303200|1|1)…	-
FBtr0303202	3R_26246771_SNP	A	T	0.1954	34	140	8.53e-06	0.0968458	SiteClass[FBgn0261704|CG42740|INTRON|0;FBgn0027544|CG2217|DOWNSTREAM|155],TranscriptAnnot[UTR_5_PRIME(MODIFIER||1817||51|CG42740|protein_coding|CODING|FBtr0303201|2|1);UTR_5_PRIME(MODIFIER||1817||51|CG42740|protein_coding|CODING|FBtr0303202|1|1);UTR_3_PRIME(MODIFIER||442||364|CG2217|protein_coding|CODING|FBtr0085630|2|1);UTR_3_PRIME(MODIFIER||442||364|CG2217|protein_coding|CODING|FBtr0303200|1|1)…	-
FBtr0085630	3R_26246771_SNP	A	T	0.1954	34	140	8.53e-06	0.0968458	SiteClass[FBgn0261704|CG42740|INTRON|0;FBgn0027544|CG2217|DOWNSTREAM|155],TranscriptAnnot[UTR_5_PRIME(MODIFIER||1817||51|CG42740|protein_coding|CODING|FBtr0303201|2|1);UTR_5_PRIME(MODIFIER||1817||51|CG42740|protein_coding|CODING|FBtr0303202|1|1);UTR_3_PRIME(MODIFIER||442||364|CG2217|protein_coding|CODING|FBtr0085630|2|1);UTR_3_PRIME(MODIFIER||442||364|CG2217|protein_coding|CODING|FBtr0303200|1|1)…	-
FBtr0303200	3R_26246771_SNP	A	T	0.1954	34	140	8.53e-06	0.0968458	SiteClass[FBgn0261704|CG42740|INTRON|0;FBgn0027544|CG2217|DOWNSTREAM|155],TranscriptAnnot[UTR_5_PRIME(MODIFIER||1817||51|CG42740|protein_coding|CODING|FBtr0303201|2|1);UTR_5_PRIME(MODIFIER||1817||51|CG42740|protein_coding|CODING|FBtr0303202|1|1);UTR_3_PRIME(MODIFIER||442||364|CG2217|protein_coding|CODING|FBtr0085630|2|1);UTR_3_PRIME(MODIFIER||442||364|CG2217|protein_coding|CODING|FBtr0303200|1|1)…	-
FBtr0344523	3R_26246771_SNP	A	T	0.1954	34	140	8.53e-06	0.0968458	SiteClass[FBgn0261704|CG42740|INTRON|0;FBgn0027544|CG2217|DOWNSTREAM|155],TranscriptAnnot[UTR_5_PRIME(MODIFIER||1817||51|CG42740|protein_coding|CODING|FBtr0303201|2|1);UTR_5_PRIME(MODIFIER||1817||51|CG42740|protein_coding|CODING|FBtr0303202|1|1);UTR_3_PRIME(MODIFIER||442||364|CG2217|protein_coding|CODING|FBtr0085630|2|1);UTR_3_PRIME(MODIFIER||442||364|CG2217|protein_coding|CODING|FBtr0303200|1|1)…	-
FBtr0344522	3R_26246771_SNP	A	T	0.1954	34	140	8.53e-06	0.0968458	SiteClass[FBgn0261704|CG42740|INTRON|0;FBgn0027544|CG2217|DOWNSTREAM|155],TranscriptAnnot[UTR_5_PRIME(MODIFIER||1817||51|CG42740|protein_coding|CODING|FBtr0303201|2|1);UTR_5_PRIME(MODIFIER||1817||51|CG42740|protein_coding|CODING|FBtr0303202|1|1);UTR_3_PRIME(MODIFIER||442||364|CG2217|protein_coding|CODING|FBtr0085630|2|1);UTR_3_PRIME(MODIFIER||442||364|CG2217|protein_coding|CODING|FBtr0303200|1|1)…	-
FBtr0344524	3R_26246771_SNP	A	T	0.1954	34	140	8.53e-06	0.0968458	SiteClass[FBgn0261704|CG42740|INTRON|0;FBgn0027544|CG2217|DOWNSTREAM|155],TranscriptAnnot[UTR_5_PRIME(MODIFIER||1817||51|CG42740|protein_coding|CODING|FBtr0303201|2|1);UTR_5_PRIME(MODIFIER||1817||51|CG42740|protein_coding|CODING|FBtr0303202|1|1);UTR_3_PRIME(MODIFIER||442||364|CG2217|protein_coding|CODING|FBtr0085630|2|1);UTR_3_PRIME(MODIFIER||442||364|CG2217|protein_coding|CODING|FBtr0303200|1|1)…	-
FBgn0261873	X_8109335_SNP	G	A	0.08475	15	162	8.54e-06	0.0968458	SiteClass[FBgn0261873|sdt|INTRON|0],TranscriptAnnot[UPSTREAM(MODIFIER||827||1367|sdt|protein_coding|CODING|FBtr0089974||1);UPSTREAM(MODIFIER||843||1269|sdt|protein_coding|CODING|FBtr0308217||1);INTRON(MODIFIER||||1292|sdt|protein_coding|CODING|FBtr0089978|3|1);INTRON(MODIFIER||||859|sdt|protein_coding|CODING|FBtr0100375|3|1);INTRON(MODIFIER||||2020|sdt|protein_coding|CODING|FBtr0100376|7|1);INTRO…	The gene stardust is referred to in FlyBase by the symbol Dmel\sdt (CG32717, FBgn0261873). It is a protein_coding_gene from Drosophila melanogaster. It has 14 annotated transcripts and 14 polypeptides (12 unique). Gene sequence location is X:8178549..8240474. It has the cytological map location 7D17-7D22. Protein features are: Guanylate kinase, conserved site; Guanylate kinase-like domain; Guanyl…
FBtr0089974	X_8109335_SNP	G	A	0.08475	15	162	8.54e-06	0.0968458	SiteClass[FBgn0261873|sdt|INTRON|0],TranscriptAnnot[UPSTREAM(MODIFIER||827||1367|sdt|protein_coding|CODING|FBtr0089974||1);UPSTREAM(MODIFIER||843||1269|sdt|protein_coding|CODING|FBtr0308217||1);INTRON(MODIFIER||||1292|sdt|protein_coding|CODING|FBtr0089978|3|1);INTRON(MODIFIER||||859|sdt|protein_coding|CODING|FBtr0100375|3|1);INTRON(MODIFIER||||2020|sdt|protein_coding|CODING|FBtr0100376|7|1);INTRO…	-
FBtr0308217	X_8109335_SNP	G	A	0.08475	15	162	8.54e-06	0.0968458	SiteClass[FBgn0261873|sdt|INTRON|0],TranscriptAnnot[UPSTREAM(MODIFIER||827||1367|sdt|protein_coding|CODING|FBtr0089974||1);UPSTREAM(MODIFIER||843||1269|sdt|protein_coding|CODING|FBtr0308217||1);INTRON(MODIFIER||||1292|sdt|protein_coding|CODING|FBtr0089978|3|1);INTRON(MODIFIER||||859|sdt|protein_coding|CODING|FBtr0100375|3|1);INTRON(MODIFIER||||2020|sdt|protein_coding|CODING|FBtr0100376|7|1);INTRO…	-
FBtr0089978	X_8109335_SNP	G	A	0.08475	15	162	8.54e-06	0.0968458	SiteClass[FBgn0261873|sdt|INTRON|0],TranscriptAnnot[UPSTREAM(MODIFIER||827||1367|sdt|protein_coding|CODING|FBtr0089974||1);UPSTREAM(MODIFIER||843||1269|sdt|protein_coding|CODING|FBtr0308217||1);INTRON(MODIFIER||||1292|sdt|protein_coding|CODING|FBtr0089978|3|1);INTRON(MODIFIER||||859|sdt|protein_coding|CODING|FBtr0100375|3|1);INTRON(MODIFIER||||2020|sdt|protein_coding|CODING|FBtr0100376|7|1);INTRO…	-
FBtr0100375	X_8109335_SNP	G	A	0.08475	15	162	8.54e-06	0.0968458	SiteClass[FBgn0261873|sdt|INTRON|0],TranscriptAnnot[UPSTREAM(MODIFIER||827||1367|sdt|protein_coding|CODING|FBtr0089974||1);UPSTREAM(MODIFIER||843||1269|sdt|protein_coding|CODING|FBtr0308217||1);INTRON(MODIFIER||||1292|sdt|protein_coding|CODING|FBtr0089978|3|1);INTRON(MODIFIER||||859|sdt|protein_coding|CODING|FBtr0100375|3|1);INTRON(MODIFIER||||2020|sdt|protein_coding|CODING|FBtr0100376|7|1);INTRO…	-
FBtr0100376	X_8109335_SNP	G	A	0.08475	15	162	8.54e-06	0.0968458	SiteClass[FBgn0261873|sdt|INTRON|0],TranscriptAnnot[UPSTREAM(MODIFIER||827||1367|sdt|protein_coding|CODING|FBtr0089974||1);UPSTREAM(MODIFIER||843||1269|sdt|protein_coding|CODING|FBtr0308217||1);INTRON(MODIFIER||||1292|sdt|protein_coding|CODING|FBtr0089978|3|1);INTRON(MODIFIER||||859|sdt|protein_coding|CODING|FBtr0100375|3|1);INTRON(MODIFIER||||2020|sdt|protein_coding|CODING|FBtr0100376|7|1);INTRO…	-
FBtr0308218	X_8109335_SNP	G	A	0.08475	15	162	8.54e-06	0.0968458	SiteClass[FBgn0261873|sdt|INTRON|0],TranscriptAnnot[UPSTREAM(MODIFIER||827||1367|sdt|protein_coding|CODING|FBtr0089974||1);UPSTREAM(MODIFIER||843||1269|sdt|protein_coding|CODING|FBtr0308217||1);INTRON(MODIFIER||||1292|sdt|protein_coding|CODING|FBtr0089978|3|1);INTRON(MODIFIER||||859|sdt|protein_coding|CODING|FBtr0100375|3|1);INTRON(MODIFIER||||2020|sdt|protein_coding|CODING|FBtr0100376|7|1);INTRO…	-
FBtr0308220	X_8109335_SNP	G	A	0.08475	15	162	8.54e-06	0.0968458	SiteClass[FBgn0261873|sdt|INTRON|0],TranscriptAnnot[UPSTREAM(MODIFIER||827||1367|sdt|protein_coding|CODING|FBtr0089974||1);UPSTREAM(MODIFIER||843||1269|sdt|protein_coding|CODING|FBtr0308217||1);INTRON(MODIFIER||||1292|sdt|protein_coding|CODING|FBtr0089978|3|1);INTRON(MODIFIER||||859|sdt|protein_coding|CODING|FBtr0100375|3|1);INTRON(MODIFIER||||2020|sdt|protein_coding|CODING|FBtr0100376|7|1);INTRO…	-
FBtr0333720	X_8109335_SNP	G	A	0.08475	15	162	8.54e-06	0.0968458	SiteClass[FBgn0261873|sdt|INTRON|0],TranscriptAnnot[UPSTREAM(MODIFIER||827||1367|sdt|protein_coding|CODING|FBtr0089974||1);UPSTREAM(MODIFIER||843||1269|sdt|protein_coding|CODING|FBtr0308217||1);INTRON(MODIFIER||||1292|sdt|protein_coding|CODING|FBtr0089978|3|1);INTRON(MODIFIER||||859|sdt|protein_coding|CODING|FBtr0100375|3|1);INTRON(MODIFIER||||2020|sdt|protein_coding|CODING|FBtr0100376|7|1);INTRO…	-
FBtr0333721	X_8109335_SNP	G	A	0.08475	15	162	8.54e-06	0.0968458	SiteClass[FBgn0261873|sdt|INTRON|0],TranscriptAnnot[UPSTREAM(MODIFIER||827||1367|sdt|protein_coding|CODING|FBtr0089974||1);UPSTREAM(MODIFIER||843||1269|sdt|protein_coding|CODING|FBtr0308217||1);INTRON(MODIFIER||||1292|sdt|protein_coding|CODING|FBtr0089978|3|1);INTRON(MODIFIER||||859|sdt|protein_coding|CODING|FBtr0100375|3|1);INTRON(MODIFIER||||2020|sdt|protein_coding|CODING|FBtr0100376|7|1);INTRO…	-
FBtr0340141	X_8109335_SNP	G	A	0.08475	15	162	8.54e-06	0.0968458	SiteClass[FBgn0261873|sdt|INTRON|0],TranscriptAnnot[UPSTREAM(MODIFIER||827||1367|sdt|protein_coding|CODING|FBtr0089974||1);UPSTREAM(MODIFIER||843||1269|sdt|protein_coding|CODING|FBtr0308217||1);INTRON(MODIFIER||||1292|sdt|protein_coding|CODING|FBtr0089978|3|1);INTRON(MODIFIER||||859|sdt|protein_coding|CODING|FBtr0100375|3|1);INTRON(MODIFIER||||2020|sdt|protein_coding|CODING|FBtr0100376|7|1);INTRO…	-
FBtr0340142	X_8109335_SNP	G	A	0.08475	15	162	8.54e-06	0.0968458	SiteClass[FBgn0261873|sdt|INTRON|0],TranscriptAnnot[UPSTREAM(MODIFIER||827||1367|sdt|protein_coding|CODING|FBtr0089974||1);UPSTREAM(MODIFIER||843||1269|sdt|protein_coding|CODING|FBtr0308217||1);INTRON(MODIFIER||||1292|sdt|protein_coding|CODING|FBtr0089978|3|1);INTRON(MODIFIER||||859|sdt|protein_coding|CODING|FBtr0100375|3|1);INTRON(MODIFIER||||2020|sdt|protein_coding|CODING|FBtr0100376|7|1);INTRO…	-
FBgn0033702	2R_8115905_SNP	A	T	0.2706	46	124	8.91e-06	0.0998611	SiteClass[FBgn0033702|CG8854|INTRON|0],TranscriptAnnot[INTRON(MODIFIER||||392|CG8854|protein_coding|CODING|FBtr0331944|1|1)]	This gene is referred to in FlyBase by the symbol Dmel\CG8854 (FBgn0033702). It is a protein_coding_gene from Drosophila melanogaster. It has 2 annotated transcripts and 2 polypeptides (1 unique). Gene sequence location is 2R:12224461..12229310. It has the cytological map location 48E10. Its molecular function is described by: . It is involved in the biological process described with: . One allel…
FBtr0331944	2R_8115905_SNP	A	T	0.2706	46	124	8.91e-06	0.0998611	SiteClass[FBgn0033702|CG8854|INTRON|0],TranscriptAnnot[INTRON(MODIFIER||||392|CG8854|protein_coding|CODING|FBtr0331944|1|1)]	-
FBgn0036777	3L_18112491_SNP	G	A	0.08824	15	155	9.13e-06	0.10014	SiteClass[FBgn0036777|CG7341|INTRON|0;FBgn0052195|CG32195|DOWNSTREAM|241],TranscriptAnnot[DOWNSTREAM(MODIFIER||241||401|CG32195|protein_coding|CODING|FBtr0075125||1);INTRON(MODIFIER||||357|CG7341|protein_coding|CODING|FBtr0075124|1|1);INTRON(MODIFIER||||357|CG7341|protein_coding|CODING|FBtr0075123|1|1)]	This gene is referred to in FlyBase by the symbol Dmel\CG7341 (FBgn0036777). It is a protein_coding_gene from Drosophila melanogaster. It has 2 annotated transcripts and 2 polypeptides (1 unique). Gene sequence location is 3L:18112959..18121003. It has the cytological map location 75B10. Its molecular function is unknown. The biological processes in which it is involved are not known. 7 alleles a…
FBgn0052195	3L_18112491_SNP	G	A	0.08824	15	155	9.13e-06	0.10014	SiteClass[FBgn0036777|CG7341|INTRON|0;FBgn0052195|CG32195|DOWNSTREAM|241],TranscriptAnnot[DOWNSTREAM(MODIFIER||241||401|CG32195|protein_coding|CODING|FBtr0075125||1);INTRON(MODIFIER||||357|CG7341|protein_coding|CODING|FBtr0075124|1|1);INTRON(MODIFIER||||357|CG7341|protein_coding|CODING|FBtr0075123|1|1)]	This gene is referred to in FlyBase by the symbol Dmel\CG32195 (FBgn0052195). It is a protein_coding_gene from Drosophila melanogaster. It has 3 annotated transcripts and 3 polypeptides (1 unique). Gene sequence location is 3L:18112959..18119150. It has the cytological map location 75B10. Protein features are: CHK kinase-like; Protein kinase-like domain; Protein of unknown function DUF227. Its mo…
FBtr0075125	3L_18112491_SNP	G	A	0.08824	15	155	9.13e-06	0.10014	SiteClass[FBgn0036777|CG7341|INTRON|0;FBgn0052195|CG32195|DOWNSTREAM|241],TranscriptAnnot[DOWNSTREAM(MODIFIER||241||401|CG32195|protein_coding|CODING|FBtr0075125||1);INTRON(MODIFIER||||357|CG7341|protein_coding|CODING|FBtr0075124|1|1);INTRON(MODIFIER||||357|CG7341|protein_coding|CODING|FBtr0075123|1|1)]	-
FBtr0075124	3L_18112491_SNP	G	A	0.08824	15	155	9.13e-06	0.10014	SiteClass[FBgn0036777|CG7341|INTRON|0;FBgn0052195|CG32195|DOWNSTREAM|241],TranscriptAnnot[DOWNSTREAM(MODIFIER||241||401|CG32195|protein_coding|CODING|FBtr0075125||1);INTRON(MODIFIER||||357|CG7341|protein_coding|CODING|FBtr0075124|1|1);INTRON(MODIFIER||||357|CG7341|protein_coding|CODING|FBtr0075123|1|1)]	-
FBtr0075123	3L_18112491_SNP	G	A	0.08824	15	155	9.13e-06	0.10014	SiteClass[FBgn0036777|CG7341|INTRON|0;FBgn0052195|CG32195|DOWNSTREAM|241],TranscriptAnnot[DOWNSTREAM(MODIFIER||241||401|CG32195|protein_coding|CODING|FBtr0075125||1);INTRON(MODIFIER||||357|CG7341|protein_coding|CODING|FBtr0075124|1|1);INTRON(MODIFIER||||357|CG7341|protein_coding|CODING|FBtr0075123|1|1)]	-
FBgn0033702	2R_8116990_SNP	T	C	0.2081	36	137	9.14e-06	0.10014	SiteClass[FBgn0033702|CG8854|UPSTREAM|175],TranscriptAnnot[UPSTREAM(MODIFIER||175||392|CG8854|protein_coding|CODING|FBtr0331944||1);INTERGENIC(MODIFIER||||||||||1)]	This gene is referred to in FlyBase by the symbol Dmel\CG8854 (FBgn0033702). It is a protein_coding_gene from Drosophila melanogaster. It has 2 annotated transcripts and 2 polypeptides (1 unique). Gene sequence location is 2R:12224461..12229310. It has the cytological map location 48E10. Its molecular function is described by: . It is involved in the biological process described with: . One allel…
FBtr0331944	2R_8116990_SNP	T	C	0.2081	36	137	9.14e-06	0.10014	SiteClass[FBgn0033702|CG8854|UPSTREAM|175],TranscriptAnnot[UPSTREAM(MODIFIER||175||392|CG8854|protein_coding|CODING|FBtr0331944||1);INTERGENIC(MODIFIER||||||||||1)]	-
FBgn0039178	3R_20113128_DEL	TACCTATATGT	T	0.2089	33	125	9.14e-06	0.10014	SiteClass[FBgn0039178|CG6356|INTRON|0],TranscriptAnnot[INTRON(MODIFIER||||570|CG6356|protein_coding|CODING|FBtr0084601|5|1)]	This gene is referred to in FlyBase by the symbol Dmel\CG6356 (FBgn0039178). It is a protein_coding_gene from Drosophila melanogaster. It has one annotated transcript and one polypeptide. Gene sequence location is 3R:24283955..24288617. It has the cytological map location 95F9. Protein features are: Major facilitator superfamily domain; Major facilitator, sugar transporter-like. Its molecular fun…
FBtr0084601	3R_20113128_DEL	TACCTATATGT	T	0.2089	33	125	9.14e-06	0.10014	SiteClass[FBgn0039178|CG6356|INTRON|0],TranscriptAnnot[INTRON(MODIFIER||||570|CG6356|protein_coding|CODING|FBtr0084601|5|1)]	-
FBgn0263219	3L_8262408_SNP	G	C	0.3429	60	115	9.3e-06	0.101181	SiteClass[FBgn0263219|Dscam4|INTRON|0],TranscriptAnnot[INTRON(MODIFIER||||1918|Dscam4|protein_coding|CODING|FBtr0299839|13|1);INTRON(MODIFIER||||1918|Dscam4|protein_coding|CODING|FBtr0299840|13|1);INTRON(MODIFIER||||1874|Dscam4|protein_coding|CODING|FBtr0299841|13|1);INTRON(MODIFIER||||1935|Dscam4|protein_coding|CODING|FBtr0333589|13|1);INTRON(MODIFIER||||1935|Dscam4|protein_coding|CODING|FBtr033…	The gene Down syndrome cell adhesion molecule 4 is referred to in FlyBase by the symbol Dmel\Dscam4 (CG42330, FBgn0263219). It is a protein_coding_gene from Drosophila melanogaster. It has 5 annotated transcripts and 5 polypeptides (3 unique). Gene sequence location is 3L:8238647..8282398. It has the cytological map location 66C1-66C2. Protein features are: Fibronectin type III; Immunoglobulin I-…
FBtr0299839	3L_8262408_SNP	G	C	0.3429	60	115	9.3e-06	0.101181	SiteClass[FBgn0263219|Dscam4|INTRON|0],TranscriptAnnot[INTRON(MODIFIER||||1918|Dscam4|protein_coding|CODING|FBtr0299839|13|1);INTRON(MODIFIER||||1918|Dscam4|protein_coding|CODING|FBtr0299840|13|1);INTRON(MODIFIER||||1874|Dscam4|protein_coding|CODING|FBtr0299841|13|1);INTRON(MODIFIER||||1935|Dscam4|protein_coding|CODING|FBtr0333589|13|1);INTRON(MODIFIER||||1935|Dscam4|protein_coding|CODING|FBtr033…	-
FBtr0299840	3L_8262408_SNP	G	C	0.3429	60	115	9.3e-06	0.101181	SiteClass[FBgn0263219|Dscam4|INTRON|0],TranscriptAnnot[INTRON(MODIFIER||||1918|Dscam4|protein_coding|CODING|FBtr0299839|13|1);INTRON(MODIFIER||||1918|Dscam4|protein_coding|CODING|FBtr0299840|13|1);INTRON(MODIFIER||||1874|Dscam4|protein_coding|CODING|FBtr0299841|13|1);INTRON(MODIFIER||||1935|Dscam4|protein_coding|CODING|FBtr0333589|13|1);INTRON(MODIFIER||||1935|Dscam4|protein_coding|CODING|FBtr033…	-
FBtr0299841	3L_8262408_SNP	G	C	0.3429	60	115	9.3e-06	0.101181	SiteClass[FBgn0263219|Dscam4|INTRON|0],TranscriptAnnot[INTRON(MODIFIER||||1918|Dscam4|protein_coding|CODING|FBtr0299839|13|1);INTRON(MODIFIER||||1918|Dscam4|protein_coding|CODING|FBtr0299840|13|1);INTRON(MODIFIER||||1874|Dscam4|protein_coding|CODING|FBtr0299841|13|1);INTRON(MODIFIER||||1935|Dscam4|protein_coding|CODING|FBtr0333589|13|1);INTRON(MODIFIER||||1935|Dscam4|protein_coding|CODING|FBtr033…	-
FBtr0333589	3L_8262408_SNP	G	C	0.3429	60	115	9.3e-06	0.101181	SiteClass[FBgn0263219|Dscam4|INTRON|0],TranscriptAnnot[INTRON(MODIFIER||||1918|Dscam4|protein_coding|CODING|FBtr0299839|13|1);INTRON(MODIFIER||||1918|Dscam4|protein_coding|CODING|FBtr0299840|13|1);INTRON(MODIFIER||||1874|Dscam4|protein_coding|CODING|FBtr0299841|13|1);INTRON(MODIFIER||||1935|Dscam4|protein_coding|CODING|FBtr0333589|13|1);INTRON(MODIFIER||||1935|Dscam4|protein_coding|CODING|FBtr033…	-
FBtr0333590	3L_8262408_SNP	G	C	0.3429	60	115	9.3e-06	0.101181	SiteClass[FBgn0263219|Dscam4|INTRON|0],TranscriptAnnot[INTRON(MODIFIER||||1918|Dscam4|protein_coding|CODING|FBtr0299839|13|1);INTRON(MODIFIER||||1918|Dscam4|protein_coding|CODING|FBtr0299840|13|1);INTRON(MODIFIER||||1874|Dscam4|protein_coding|CODING|FBtr0299841|13|1);INTRON(MODIFIER||||1935|Dscam4|protein_coding|CODING|FBtr0333589|13|1);INTRON(MODIFIER||||1935|Dscam4|protein_coding|CODING|FBtr033…	-
FBgn0003339	3R_2665283_MNP	ATC	GCG	0.05814	10	162	9.41e-06	0.101291	SiteClass[FBgn0003339|Scr|INTRON|0],TranscriptAnnot[INTRON(MODIFIER||||417|Scr|protein_coding|CODING|FBtr0081657|2|1);INTRON(MODIFIER||||417|Scr|protein_coding|CODING|FBtr0081658|2|1)]	The gene Sex combs reduced is referred to in FlyBase by the symbol Dmel\Scr (CG1030, FBgn0003339). It is a protein_coding_gene from Drosophila melanogaster. It has 2 annotated transcripts and 2 polypeptides (1 unique). Gene sequence location is 3R:6823120..6849981. It has the cytological map location 84A5. Protein features are: Homeobox domain; Homeobox protein, antennapedia type; Homeobox protei…
FBtr0081657	3R_2665283_MNP	ATC	GCG	0.05814	10	162	9.41e-06	0.101291	SiteClass[FBgn0003339|Scr|INTRON|0],TranscriptAnnot[INTRON(MODIFIER||||417|Scr|protein_coding|CODING|FBtr0081657|2|1);INTRON(MODIFIER||||417|Scr|protein_coding|CODING|FBtr0081658|2|1)]	-
FBtr0081658	3R_2665283_MNP	ATC	GCG	0.05814	10	162	9.41e-06	0.101291	SiteClass[FBgn0003339|Scr|INTRON|0],TranscriptAnnot[INTRON(MODIFIER||||417|Scr|protein_coding|CODING|FBtr0081657|2|1);INTRON(MODIFIER||||417|Scr|protein_coding|CODING|FBtr0081658|2|1)]	-
FBgn0263930	3L_8839530_SNP	T	C	0.1011	18	160	9.55e-06	0.102298	SiteClass[FBgn0263930|dally|INTRON|0],TranscriptAnnot[INTRON(MODIFIER||||626|dally|protein_coding|CODING|FBtr0076583|1|1);INTRON(MODIFIER||||626|dally|protein_coding|CODING|FBtr0305901|1|1)]	The gene division abnormally delayed is referred to in FlyBase by the symbol Dmel\dally (CG4974, FBgn0263930). It is a protein_coding_gene from Drosophila melanogaster. It has 2 annotated transcripts and 2 polypeptides (1 unique). Gene sequence location is 3L:8827505..8891192. It has the cytological map location 66E1-66E3. Protein features are: Division abnormally delayed protein; Glypican. Its m…
FBtr0076583	3L_8839530_SNP	T	C	0.1011	18	160	9.55e-06	0.102298	SiteClass[FBgn0263930|dally|INTRON|0],TranscriptAnnot[INTRON(MODIFIER||||626|dally|protein_coding|CODING|FBtr0076583|1|1);INTRON(MODIFIER||||626|dally|protein_coding|CODING|FBtr0305901|1|1)]	-
FBtr0305901	3L_8839530_SNP	T	C	0.1011	18	160	9.55e-06	0.102298	SiteClass[FBgn0263930|dally|INTRON|0],TranscriptAnnot[INTRON(MODIFIER||||626|dally|protein_coding|CODING|FBtr0076583|1|1);INTRON(MODIFIER||||626|dally|protein_coding|CODING|FBtr0305901|1|1)]	-
FBgn0051481	3R_2538420_SNP	A	C	0.09317	15	146	9.87e-06	0.104111	SiteClass[FBgn0051481|pb|INTRON|0],TranscriptAnnot[INTRON(MODIFIER||||777|pb|protein_coding|CODING|FBtr0089277|3|1);INTRON(MODIFIER||||772|pb|protein_coding|CODING|FBtr0089279|2|1);INTRON(MODIFIER||||782|pb|protein_coding|CODING|FBtr0089276|3|1);INTRON(MODIFIER||||777|pb|protein_coding|CODING|FBtr0089278|2|1)]	The gene proboscipedia is referred to in FlyBase by the symbol Dmel\pb (CG31481, FBgn0051481). It is a protein_coding_gene from Drosophila melanogaster. It has 4 annotated transcripts and 4 polypeptides (all unique). Gene sequence location is 3R:6707800..6742063. It has the cytological map location 84A5. Protein features are: Homeobox domain; Homeobox protein, antennapedia type, conserved site; H…
FBtr0089277	3R_2538420_SNP	A	C	0.09317	15	146	9.87e-06	0.104111	SiteClass[FBgn0051481|pb|INTRON|0],TranscriptAnnot[INTRON(MODIFIER||||777|pb|protein_coding|CODING|FBtr0089277|3|1);INTRON(MODIFIER||||772|pb|protein_coding|CODING|FBtr0089279|2|1);INTRON(MODIFIER||||782|pb|protein_coding|CODING|FBtr0089276|3|1);INTRON(MODIFIER||||777|pb|protein_coding|CODING|FBtr0089278|2|1)]	-
FBtr0089279	3R_2538420_SNP	A	C	0.09317	15	146	9.87e-06	0.104111	SiteClass[FBgn0051481|pb|INTRON|0],TranscriptAnnot[INTRON(MODIFIER||||777|pb|protein_coding|CODING|FBtr0089277|3|1);INTRON(MODIFIER||||772|pb|protein_coding|CODING|FBtr0089279|2|1);INTRON(MODIFIER||||782|pb|protein_coding|CODING|FBtr0089276|3|1);INTRON(MODIFIER||||777|pb|protein_coding|CODING|FBtr0089278|2|1)]	-
FBtr0089276	3R_2538420_SNP	A	C	0.09317	15	146	9.87e-06	0.104111	SiteClass[FBgn0051481|pb|INTRON|0],TranscriptAnnot[INTRON(MODIFIER||||777|pb|protein_coding|CODING|FBtr0089277|3|1);INTRON(MODIFIER||||772|pb|protein_coding|CODING|FBtr0089279|2|1);INTRON(MODIFIER||||782|pb|protein_coding|CODING|FBtr0089276|3|1);INTRON(MODIFIER||||777|pb|protein_coding|CODING|FBtr0089278|2|1)]	-
FBtr0089278	3R_2538420_SNP	A	C	0.09317	15	146	9.87e-06	0.104111	SiteClass[FBgn0051481|pb|INTRON|0],TranscriptAnnot[INTRON(MODIFIER||||777|pb|protein_coding|CODING|FBtr0089277|3|1);INTRON(MODIFIER||||772|pb|protein_coding|CODING|FBtr0089279|2|1);INTRON(MODIFIER||||782|pb|protein_coding|CODING|FBtr0089276|3|1);INTRON(MODIFIER||||777|pb|protein_coding|CODING|FBtr0089278|2|1)]	-
FBgn0037801	3R_6080248_SNP	A	G	0.05682	10	166	9.89e-06	0.104111	SiteClass[FBgn0037801|CG3999|SYNONYMOUS_CODING|0;FBgn0037802|Sirt6|DOWNSTREAM|823],TranscriptAnnot[SYNONYMOUS_CODING(LOW|SILENT|agG/agA|R818|985|CG3999|protein_coding|CODING|FBtr0337048|5|1);SYNONYMOUS_CODING(LOW|SILENT|agG/agA|R818|985|CG3999|protein_coding|CODING|FBtr0082225|5|1);DOWNSTREAM(MODIFIER||823||325|Sirt6|protein_coding|CODING|FBtr0305358||1)]	This gene is referred to in FlyBase by the symbol Dmel\CG3999 (FBgn0037801). It is a protein_coding_gene from Drosophila melanogaster. It has 2 annotated transcripts and 2 polypeptides (1 unique). Gene sequence location is 3R:10251518..10255268. It has the cytological map location 86A2. Protein features are: Glycine cleavage system P protein; Glycine cleavage system P-protein, N-terminal; Glycine…
FBgn0037802	3R_6080248_SNP	A	G	0.05682	10	166	9.89e-06	0.104111	SiteClass[FBgn0037801|CG3999|SYNONYMOUS_CODING|0;FBgn0037802|Sirt6|DOWNSTREAM|823],TranscriptAnnot[SYNONYMOUS_CODING(LOW|SILENT|agG/agA|R818|985|CG3999|protein_coding|CODING|FBtr0337048|5|1);SYNONYMOUS_CODING(LOW|SILENT|agG/agA|R818|985|CG3999|protein_coding|CODING|FBtr0082225|5|1);DOWNSTREAM(MODIFIER||823||325|Sirt6|protein_coding|CODING|FBtr0305358||1)]	The gene Sirtuin 6 is referred to in FlyBase by the symbol Dmel\Sirt6 (CG6284, FBgn0037802). It is a protein_coding_gene from Drosophila melanogaster. It has one annotated transcript and one polypeptide. Gene sequence location is 3R:10255349..10261849. It has the cytological map location 86A2-86A3. Protein features are: DHS-like NAD/FAD-binding domain; Sirtuin family; Sirtuin family, catalytic co…
FBtr0337048	3R_6080248_SNP	A	G	0.05682	10	166	9.89e-06	0.104111	SiteClass[FBgn0037801|CG3999|SYNONYMOUS_CODING|0;FBgn0037802|Sirt6|DOWNSTREAM|823],TranscriptAnnot[SYNONYMOUS_CODING(LOW|SILENT|agG/agA|R818|985|CG3999|protein_coding|CODING|FBtr0337048|5|1);SYNONYMOUS_CODING(LOW|SILENT|agG/agA|R818|985|CG3999|protein_coding|CODING|FBtr0082225|5|1);DOWNSTREAM(MODIFIER||823||325|Sirt6|protein_coding|CODING|FBtr0305358||1)]	-
FBtr0082225	3R_6080248_SNP	A	G	0.05682	10	166	9.89e-06	0.104111	SiteClass[FBgn0037801|CG3999|SYNONYMOUS_CODING|0;FBgn0037802|Sirt6|DOWNSTREAM|823],TranscriptAnnot[SYNONYMOUS_CODING(LOW|SILENT|agG/agA|R818|985|CG3999|protein_coding|CODING|FBtr0337048|5|1);SYNONYMOUS_CODING(LOW|SILENT|agG/agA|R818|985|CG3999|protein_coding|CODING|FBtr0082225|5|1);DOWNSTREAM(MODIFIER||823||325|Sirt6|protein_coding|CODING|FBtr0305358||1)]	-
FBtr0305358	3R_6080248_SNP	A	G	0.05682	10	166	9.89e-06	0.104111	SiteClass[FBgn0037801|CG3999|SYNONYMOUS_CODING|0;FBgn0037802|Sirt6|DOWNSTREAM|823],TranscriptAnnot[SYNONYMOUS_CODING(LOW|SILENT|agG/agA|R818|985|CG3999|protein_coding|CODING|FBtr0337048|5|1);SYNONYMOUS_CODING(LOW|SILENT|agG/agA|R818|985|CG3999|protein_coding|CODING|FBtr0082225|5|1);DOWNSTREAM(MODIFIER||823||325|Sirt6|protein_coding|CODING|FBtr0305358||1)]	-
FBgn0003339	3R_2664404_SNP	G	A	0.06024	10	156	1.02e-05	0.1062	SiteClass[FBgn0003339|Scr|INTRON|0],TranscriptAnnot[INTRON(MODIFIER||||417|Scr|protein_coding|CODING|FBtr0081657|2|1);INTRON(MODIFIER||||417|Scr|protein_coding|CODING|FBtr0081658|2|1)]	The gene Sex combs reduced is referred to in FlyBase by the symbol Dmel\Scr (CG1030, FBgn0003339). It is a protein_coding_gene from Drosophila melanogaster. It has 2 annotated transcripts and 2 polypeptides (1 unique). Gene sequence location is 3R:6823120..6849981. It has the cytological map location 84A5. Protein features are: Homeobox domain; Homeobox protein, antennapedia type; Homeobox protei…
FBtr0081657	3R_2664404_SNP	G	A	0.06024	10	156	1.02e-05	0.1062	SiteClass[FBgn0003339|Scr|INTRON|0],TranscriptAnnot[INTRON(MODIFIER||||417|Scr|protein_coding|CODING|FBtr0081657|2|1);INTRON(MODIFIER||||417|Scr|protein_coding|CODING|FBtr0081658|2|1)]	-
FBtr0081658	3R_2664404_SNP	G	A	0.06024	10	156	1.02e-05	0.1062	SiteClass[FBgn0003339|Scr|INTRON|0],TranscriptAnnot[INTRON(MODIFIER||||417|Scr|protein_coding|CODING|FBtr0081657|2|1);INTRON(MODIFIER||||417|Scr|protein_coding|CODING|FBtr0081658|2|1)]	-
FBgn0019948	2R_19872855_SNP	T	G	0.05618	10	168	1.03e-05	0.106301	SiteClass[FBgn0019948|Phm|DOWNSTREAM|7;FBgn0005612|Sox14|DOWNSTREAM|155],TranscriptAnnot[UTR_3_PRIME(MODIFIER||195||365|Phm|protein_coding|CODING|FBtr0072203|8|1);DOWNSTREAM(MODIFIER||7||365|Phm|protein_coding|CODING|FBtr0072202||1);DOWNSTREAM(MODIFIER||155||669|Sox14|protein_coding|CODING|FBtr0072157||1);DOWNSTREAM(MODIFIER||155||669|Sox14|protein_coding|CODING|FBtr0072158||1);DOWNSTREAM(MODIFIE…	-
FBgn0005612	2R_19872855_SNP	T	G	0.05618	10	168	1.03e-05	0.106301	SiteClass[FBgn0019948|Phm|DOWNSTREAM|7;FBgn0005612|Sox14|DOWNSTREAM|155],TranscriptAnnot[UTR_3_PRIME(MODIFIER||195||365|Phm|protein_coding|CODING|FBtr0072203|8|1);DOWNSTREAM(MODIFIER||7||365|Phm|protein_coding|CODING|FBtr0072202||1);DOWNSTREAM(MODIFIER||155||669|Sox14|protein_coding|CODING|FBtr0072157||1);DOWNSTREAM(MODIFIER||155||669|Sox14|protein_coding|CODING|FBtr0072158||1);DOWNSTREAM(MODIFIE…	The gene Sox box protein 14 is referred to in FlyBase by the symbol Dmel\Sox14 (CG3090, FBgn0005612). It is a protein_coding_gene from Drosophila melanogaster. It has 3 annotated transcripts and 3 polypeptides (1 unique). Gene sequence location is 2R:23978801..23985177. It has the cytological map location 60A16. Protein features are: High mobility group box domain. Its molecular function is descr…
FBtr0072203	2R_19872855_SNP	T	G	0.05618	10	168	1.03e-05	0.106301	SiteClass[FBgn0019948|Phm|DOWNSTREAM|7;FBgn0005612|Sox14|DOWNSTREAM|155],TranscriptAnnot[UTR_3_PRIME(MODIFIER||195||365|Phm|protein_coding|CODING|FBtr0072203|8|1);DOWNSTREAM(MODIFIER||7||365|Phm|protein_coding|CODING|FBtr0072202||1);DOWNSTREAM(MODIFIER||155||669|Sox14|protein_coding|CODING|FBtr0072157||1);DOWNSTREAM(MODIFIER||155||669|Sox14|protein_coding|CODING|FBtr0072158||1);DOWNSTREAM(MODIFIE…	-
FBtr0072202	2R_19872855_SNP	T	G	0.05618	10	168	1.03e-05	0.106301	SiteClass[FBgn0019948|Phm|DOWNSTREAM|7;FBgn0005612|Sox14|DOWNSTREAM|155],TranscriptAnnot[UTR_3_PRIME(MODIFIER||195||365|Phm|protein_coding|CODING|FBtr0072203|8|1);DOWNSTREAM(MODIFIER||7||365|Phm|protein_coding|CODING|FBtr0072202||1);DOWNSTREAM(MODIFIER||155||669|Sox14|protein_coding|CODING|FBtr0072157||1);DOWNSTREAM(MODIFIER||155||669|Sox14|protein_coding|CODING|FBtr0072158||1);DOWNSTREAM(MODIFIE…	-
FBtr0072157	2R_19872855_SNP	T	G	0.05618	10	168	1.03e-05	0.106301	SiteClass[FBgn0019948|Phm|DOWNSTREAM|7;FBgn0005612|Sox14|DOWNSTREAM|155],TranscriptAnnot[UTR_3_PRIME(MODIFIER||195||365|Phm|protein_coding|CODING|FBtr0072203|8|1);DOWNSTREAM(MODIFIER||7||365|Phm|protein_coding|CODING|FBtr0072202||1);DOWNSTREAM(MODIFIER||155||669|Sox14|protein_coding|CODING|FBtr0072157||1);DOWNSTREAM(MODIFIER||155||669|Sox14|protein_coding|CODING|FBtr0072158||1);DOWNSTREAM(MODIFIE…	-
FBtr0072158	2R_19872855_SNP	T	G	0.05618	10	168	1.03e-05	0.106301	SiteClass[FBgn0019948|Phm|DOWNSTREAM|7;FBgn0005612|Sox14|DOWNSTREAM|155],TranscriptAnnot[UTR_3_PRIME(MODIFIER||195||365|Phm|protein_coding|CODING|FBtr0072203|8|1);DOWNSTREAM(MODIFIER||7||365|Phm|protein_coding|CODING|FBtr0072202||1);DOWNSTREAM(MODIFIER||155||669|Sox14|protein_coding|CODING|FBtr0072157||1);DOWNSTREAM(MODIFIER||155||669|Sox14|protein_coding|CODING|FBtr0072158||1);DOWNSTREAM(MODIFIE…	-
FBtr0343282	2R_19872855_SNP	T	G	0.05618	10	168	1.03e-05	0.106301	SiteClass[FBgn0019948|Phm|DOWNSTREAM|7;FBgn0005612|Sox14|DOWNSTREAM|155],TranscriptAnnot[UTR_3_PRIME(MODIFIER||195||365|Phm|protein_coding|CODING|FBtr0072203|8|1);DOWNSTREAM(MODIFIER||7||365|Phm|protein_coding|CODING|FBtr0072202||1);DOWNSTREAM(MODIFIER||155||669|Sox14|protein_coding|CODING|FBtr0072157||1);DOWNSTREAM(MODIFIER||155||669|Sox14|protein_coding|CODING|FBtr0072158||1);DOWNSTREAM(MODIFIE…	-
FBgn0036544	3L_15904225_SNP	C	G	0.05085	9	168	1.03e-05	0.106342	SiteClass[FBgn0036544|sff|INTRON|0],TranscriptAnnot[INTRON(MODIFIER||||861|sff|protein_coding|CODING|FBtr0089527|2|1);INTRON(MODIFIER||||845|sff|protein_coding|CODING|FBtr0334070|2|1);INTRON(MODIFIER||||851|sff|protein_coding|CODING|FBtr0334071|2|1)]	The gene sugar-free frosting is referred to in FlyBase by the symbol Dmel\sff (CG6114, FBgn0036544). It is a protein_coding_gene from Drosophila melanogaster. It has 3 annotated transcripts and 3 polypeptides (all unique). Gene sequence location is 3L:15900156..15924861. It has the cytological map location 72A4-72B1. Protein features are: Protein kinase domain; Protein kinase, ATP binding site; P…
FBtr0089527	3L_15904225_SNP	C	G	0.05085	9	168	1.03e-05	0.106342	SiteClass[FBgn0036544|sff|INTRON|0],TranscriptAnnot[INTRON(MODIFIER||||861|sff|protein_coding|CODING|FBtr0089527|2|1);INTRON(MODIFIER||||845|sff|protein_coding|CODING|FBtr0334070|2|1);INTRON(MODIFIER||||851|sff|protein_coding|CODING|FBtr0334071|2|1)]	-
FBtr0334070	3L_15904225_SNP	C	G	0.05085	9	168	1.03e-05	0.106342	SiteClass[FBgn0036544|sff|INTRON|0],TranscriptAnnot[INTRON(MODIFIER||||861|sff|protein_coding|CODING|FBtr0089527|2|1);INTRON(MODIFIER||||845|sff|protein_coding|CODING|FBtr0334070|2|1);INTRON(MODIFIER||||851|sff|protein_coding|CODING|FBtr0334071|2|1)]	-
FBtr0334071	3L_15904225_SNP	C	G	0.05085	9	168	1.03e-05	0.106342	SiteClass[FBgn0036544|sff|INTRON|0],TranscriptAnnot[INTRON(MODIFIER||||861|sff|protein_coding|CODING|FBtr0089527|2|1);INTRON(MODIFIER||||845|sff|protein_coding|CODING|FBtr0334070|2|1);INTRON(MODIFIER||||851|sff|protein_coding|CODING|FBtr0334071|2|1)]	-
FBgn0033958	2R_10629515_SNP	A	G	0.07514	13	160	1.06e-05	0.107319	SiteClass[FBgn0033958|CG12858|SYNONYMOUS_CODING|0],TranscriptAnnot[SYNONYMOUS_CODING(LOW|SILENT|ggC/ggT|G521|762|CG12858|protein_coding|CODING|FBtr0309056|4|1);SYNONYMOUS_CODING(LOW|SILENT|ggC/ggT|G521|762|CG12858|protein_coding|CODING|FBtr0087476|4|1)]	This gene is referred to in FlyBase by the symbol Dmel\CG12858 (FBgn0033958). It is a protein_coding_gene from Drosophila melanogaster. It has 2 annotated transcripts and 2 polypeptides (1 unique). Gene sequence location is 2R:14739359..14745335. It has the cytological map location 51C1. Protein features are: Major facilitator superfamily; Major facilitator superfamily associated domain; Major fa…
FBtr0309056	2R_10629515_SNP	A	G	0.07514	13	160	1.06e-05	0.107319	SiteClass[FBgn0033958|CG12858|SYNONYMOUS_CODING|0],TranscriptAnnot[SYNONYMOUS_CODING(LOW|SILENT|ggC/ggT|G521|762|CG12858|protein_coding|CODING|FBtr0309056|4|1);SYNONYMOUS_CODING(LOW|SILENT|ggC/ggT|G521|762|CG12858|protein_coding|CODING|FBtr0087476|4|1)]	-
FBtr0087476	2R_10629515_SNP	A	G	0.07514	13	160	1.06e-05	0.107319	SiteClass[FBgn0033958|CG12858|SYNONYMOUS_CODING|0],TranscriptAnnot[SYNONYMOUS_CODING(LOW|SILENT|ggC/ggT|G521|762|CG12858|protein_coding|CODING|FBtr0309056|4|1);SYNONYMOUS_CODING(LOW|SILENT|ggC/ggT|G521|762|CG12858|protein_coding|CODING|FBtr0087476|4|1)]	-
FBgn0034643	2R_17526376_SNP	C	T	0.0565	10	167	1.09e-05	0.107319	SiteClass[FBgn0034643|CG10321|DOWNSTREAM|472],TranscriptAnnot[DOWNSTREAM(MODIFIER||472||835|CG10321|protein_coding|CODING|FBtr0071660||1);DOWNSTREAM(MODIFIER||472||855|CG10321|protein_coding|CODING|FBtr0330228||1);INTERGENIC(MODIFIER||||||||||1)]	This gene is referred to in FlyBase by the symbol Dmel\CG10321 (FBgn0034643). It is a protein_coding_gene from Drosophila melanogaster. It has 2 annotated transcripts and 2 polypeptides (all unique). Gene sequence location is 2R:21634679..21638399. It has the cytological map location 57F5. Protein features are: Zinc finger C2H2-type/integrase DNA-binding domain; Zinc finger, AD-type; Zinc finger,…
FBtr0071660	2R_17526376_SNP	C	T	0.0565	10	167	1.09e-05	0.107319	SiteClass[FBgn0034643|CG10321|DOWNSTREAM|472],TranscriptAnnot[DOWNSTREAM(MODIFIER||472||835|CG10321|protein_coding|CODING|FBtr0071660||1);DOWNSTREAM(MODIFIER||472||855|CG10321|protein_coding|CODING|FBtr0330228||1);INTERGENIC(MODIFIER||||||||||1)]	-
FBtr0330228	2R_17526376_SNP	C	T	0.0565	10	167	1.09e-05	0.107319	SiteClass[FBgn0034643|CG10321|DOWNSTREAM|472],TranscriptAnnot[DOWNSTREAM(MODIFIER||472||835|CG10321|protein_coding|CODING|FBtr0071660||1);DOWNSTREAM(MODIFIER||472||855|CG10321|protein_coding|CODING|FBtr0330228||1);INTERGENIC(MODIFIER||||||||||1)]	-
FBgn0040823	3L_10002979_SNP	G	A	0.07955	14	162	1.09e-05	0.107319	SiteClass[FBgn0040823|dpr6|INTRON|0],TranscriptAnnot[INTRON(MODIFIER||||283|dpr6|protein_coding|CODING|FBtr0076353|2|1);INTRON(MODIFIER||||390|dpr6|protein_coding|CODING|FBtr0331536|2|1);INTRON(MODIFIER||||286|dpr6|protein_coding|CODING|FBtr0332665|2|1);INTRON(MODIFIER||||283|dpr6|protein_coding|CODING|FBtr0332666|2|1);INTRON(MODIFIER||||396|dpr6|protein_coding|CODING|FBtr0344949|2|1)]	The gene defective proboscis extension response 6 is referred to in FlyBase by the symbol Dmel\dpr6 (CG14162, FBgn0040823). It is a protein_coding_gene from Drosophila melanogaster. It has 5 annotated transcripts and 5 polypeptides (all unique). Gene sequence location is 3L:9974651..10139360. It has the cytological map location 67D2-67D8. Protein features are: Immunoglobulin I-set; Immunoglobulin…
FBtr0076353	3L_10002979_SNP	G	A	0.07955	14	162	1.09e-05	0.107319	SiteClass[FBgn0040823|dpr6|INTRON|0],TranscriptAnnot[INTRON(MODIFIER||||283|dpr6|protein_coding|CODING|FBtr0076353|2|1);INTRON(MODIFIER||||390|dpr6|protein_coding|CODING|FBtr0331536|2|1);INTRON(MODIFIER||||286|dpr6|protein_coding|CODING|FBtr0332665|2|1);INTRON(MODIFIER||||283|dpr6|protein_coding|CODING|FBtr0332666|2|1);INTRON(MODIFIER||||396|dpr6|protein_coding|CODING|FBtr0344949|2|1)]	-
FBtr0331536	3L_10002979_SNP	G	A	0.07955	14	162	1.09e-05	0.107319	SiteClass[FBgn0040823|dpr6|INTRON|0],TranscriptAnnot[INTRON(MODIFIER||||283|dpr6|protein_coding|CODING|FBtr0076353|2|1);INTRON(MODIFIER||||390|dpr6|protein_coding|CODING|FBtr0331536|2|1);INTRON(MODIFIER||||286|dpr6|protein_coding|CODING|FBtr0332665|2|1);INTRON(MODIFIER||||283|dpr6|protein_coding|CODING|FBtr0332666|2|1);INTRON(MODIFIER||||396|dpr6|protein_coding|CODING|FBtr0344949|2|1)]	-
FBtr0332665	3L_10002979_SNP	G	A	0.07955	14	162	1.09e-05	0.107319	SiteClass[FBgn0040823|dpr6|INTRON|0],TranscriptAnnot[INTRON(MODIFIER||||283|dpr6|protein_coding|CODING|FBtr0076353|2|1);INTRON(MODIFIER||||390|dpr6|protein_coding|CODING|FBtr0331536|2|1);INTRON(MODIFIER||||286|dpr6|protein_coding|CODING|FBtr0332665|2|1);INTRON(MODIFIER||||283|dpr6|protein_coding|CODING|FBtr0332666|2|1);INTRON(MODIFIER||||396|dpr6|protein_coding|CODING|FBtr0344949|2|1)]	-
FBtr0332666	3L_10002979_SNP	G	A	0.07955	14	162	1.09e-05	0.107319	SiteClass[FBgn0040823|dpr6|INTRON|0],TranscriptAnnot[INTRON(MODIFIER||||283|dpr6|protein_coding|CODING|FBtr0076353|2|1);INTRON(MODIFIER||||390|dpr6|protein_coding|CODING|FBtr0331536|2|1);INTRON(MODIFIER||||286|dpr6|protein_coding|CODING|FBtr0332665|2|1);INTRON(MODIFIER||||283|dpr6|protein_coding|CODING|FBtr0332666|2|1);INTRON(MODIFIER||||396|dpr6|protein_coding|CODING|FBtr0344949|2|1)]	-
FBtr0344949	3L_10002979_SNP	G	A	0.07955	14	162	1.09e-05	0.107319	SiteClass[FBgn0040823|dpr6|INTRON|0],TranscriptAnnot[INTRON(MODIFIER||||283|dpr6|protein_coding|CODING|FBtr0076353|2|1);INTRON(MODIFIER||||390|dpr6|protein_coding|CODING|FBtr0331536|2|1);INTRON(MODIFIER||||286|dpr6|protein_coding|CODING|FBtr0332665|2|1);INTRON(MODIFIER||||283|dpr6|protein_coding|CODING|FBtr0332666|2|1);INTRON(MODIFIER||||396|dpr6|protein_coding|CODING|FBtr0344949|2|1)]	-
FBgn0027654	3R_26345695_SNP	T	G	0.0565	10	167	1.09e-05	0.107319	SiteClass[FBgn0027654|jdp|INTRON|0],TranscriptAnnot[INTRON(MODIFIER||||195|jdp|protein_coding|CODING|FBtr0085681|3|1);INTRON(MODIFIER||||182|jdp|protein_coding|CODING|FBtr0085682|3|1);INTRON(MODIFIER||||170|jdp|protein_coding|CODING|FBtr0085683|3|1)]	The gene jdp is referred to in FlyBase by the symbol Dmel\jdp (CG2239, FBgn0027654). It is a protein_coding_gene from Drosophila melanogaster. It has 3 annotated transcripts and 3 polypeptides (all unique). Gene sequence location is 3R:30517059..30527037. It has the cytological map location 99F7. Protein features are: DnaJ domain. Its molecular function is described by: unfolded protein binding. …
FBtr0085681	3R_26345695_SNP	T	G	0.0565	10	167	1.09e-05	0.107319	SiteClass[FBgn0027654|jdp|INTRON|0],TranscriptAnnot[INTRON(MODIFIER||||195|jdp|protein_coding|CODING|FBtr0085681|3|1);INTRON(MODIFIER||||182|jdp|protein_coding|CODING|FBtr0085682|3|1);INTRON(MODIFIER||||170|jdp|protein_coding|CODING|FBtr0085683|3|1)]	-
FBtr0085682	3R_26345695_SNP	T	G	0.0565	10	167	1.09e-05	0.107319	SiteClass[FBgn0027654|jdp|INTRON|0],TranscriptAnnot[INTRON(MODIFIER||||195|jdp|protein_coding|CODING|FBtr0085681|3|1);INTRON(MODIFIER||||182|jdp|protein_coding|CODING|FBtr0085682|3|1);INTRON(MODIFIER||||170|jdp|protein_coding|CODING|FBtr0085683|3|1)]	-
FBtr0085683	3R_26345695_SNP	T	G	0.0565	10	167	1.09e-05	0.107319	SiteClass[FBgn0027654|jdp|INTRON|0],TranscriptAnnot[INTRON(MODIFIER||||195|jdp|protein_coding|CODING|FBtr0085681|3|1);INTRON(MODIFIER||||182|jdp|protein_coding|CODING|FBtr0085682|3|1);INTRON(MODIFIER||||170|jdp|protein_coding|CODING|FBtr0085683|3|1)]	-
FBgn0027654	3R_26345696_SNP	G	T	0.0565	10	167	1.09e-05	0.107319	SiteClass[FBgn0027654|jdp|INTRON|0],TranscriptAnnot[INTRON(MODIFIER||||195|jdp|protein_coding|CODING|FBtr0085681|3|1);INTRON(MODIFIER||||182|jdp|protein_coding|CODING|FBtr0085682|3|1);INTRON(MODIFIER||||170|jdp|protein_coding|CODING|FBtr0085683|3|1)]	The gene jdp is referred to in FlyBase by the symbol Dmel\jdp (CG2239, FBgn0027654). It is a protein_coding_gene from Drosophila melanogaster. It has 3 annotated transcripts and 3 polypeptides (all unique). Gene sequence location is 3R:30517059..30527037. It has the cytological map location 99F7. Protein features are: DnaJ domain. Its molecular function is described by: unfolded protein binding. …
FBtr0085681	3R_26345696_SNP	G	T	0.0565	10	167	1.09e-05	0.107319	SiteClass[FBgn0027654|jdp|INTRON|0],TranscriptAnnot[INTRON(MODIFIER||||195|jdp|protein_coding|CODING|FBtr0085681|3|1);INTRON(MODIFIER||||182|jdp|protein_coding|CODING|FBtr0085682|3|1);INTRON(MODIFIER||||170|jdp|protein_coding|CODING|FBtr0085683|3|1)]	-
FBtr0085682	3R_26345696_SNP	G	T	0.0565	10	167	1.09e-05	0.107319	SiteClass[FBgn0027654|jdp|INTRON|0],TranscriptAnnot[INTRON(MODIFIER||||195|jdp|protein_coding|CODING|FBtr0085681|3|1);INTRON(MODIFIER||||182|jdp|protein_coding|CODING|FBtr0085682|3|1);INTRON(MODIFIER||||170|jdp|protein_coding|CODING|FBtr0085683|3|1)]	-
FBtr0085683	3R_26345696_SNP	G	T	0.0565	10	167	1.09e-05	0.107319	SiteClass[FBgn0027654|jdp|INTRON|0],TranscriptAnnot[INTRON(MODIFIER||||195|jdp|protein_coding|CODING|FBtr0085681|3|1);INTRON(MODIFIER||||182|jdp|protein_coding|CODING|FBtr0085682|3|1);INTRON(MODIFIER||||170|jdp|protein_coding|CODING|FBtr0085683|3|1)]	-
FBgn0014135	3R_15623343_SNP	C	A	0.08092	14	159	1.11e-05	0.107554	SiteClass[FBgn0014135|bnl|INTRON|0],TranscriptAnnot[INTRON(MODIFIER||||770|bnl|protein_coding|CODING|FBtr0083795|3|1);INTRON(MODIFIER||||760|bnl|protein_coding|CODING|FBtr0300123|3|1);INTRON(MODIFIER||||760|bnl|protein_coding|CODING|FBtr0344549|3|1)]	The gene branchless is referred to in FlyBase by the symbol Dmel\bnl (CG4608, FBgn0014135). It is a protein_coding_gene from Drosophila melanogaster. It has 3 annotated transcripts and 3 polypeptides (2 unique). Gene sequence location is 3R:19794073..19836817. It has the cytological map location 92B2-92B3. Protein features are: Cytokine, IL-1-like; Fibroblast growth factor family. Its molecular f…
FBtr0083795	3R_15623343_SNP	C	A	0.08092	14	159	1.11e-05	0.107554	SiteClass[FBgn0014135|bnl|INTRON|0],TranscriptAnnot[INTRON(MODIFIER||||770|bnl|protein_coding|CODING|FBtr0083795|3|1);INTRON(MODIFIER||||760|bnl|protein_coding|CODING|FBtr0300123|3|1);INTRON(MODIFIER||||760|bnl|protein_coding|CODING|FBtr0344549|3|1)]	-
FBtr0300123	3R_15623343_SNP	C	A	0.08092	14	159	1.11e-05	0.107554	SiteClass[FBgn0014135|bnl|INTRON|0],TranscriptAnnot[INTRON(MODIFIER||||770|bnl|protein_coding|CODING|FBtr0083795|3|1);INTRON(MODIFIER||||760|bnl|protein_coding|CODING|FBtr0300123|3|1);INTRON(MODIFIER||||760|bnl|protein_coding|CODING|FBtr0344549|3|1)]	-
FBtr0344549	3R_15623343_SNP	C	A	0.08092	14	159	1.11e-05	0.107554	SiteClass[FBgn0014135|bnl|INTRON|0],TranscriptAnnot[INTRON(MODIFIER||||770|bnl|protein_coding|CODING|FBtr0083795|3|1);INTRON(MODIFIER||||760|bnl|protein_coding|CODING|FBtr0300123|3|1);INTRON(MODIFIER||||760|bnl|protein_coding|CODING|FBtr0344549|3|1)]	-
FBgn0003339	3R_2658973_SNP	A	G	0.05325	9	160	1.11e-05	0.107554	SiteClass[FBgn0003339|Scr|INTRON|0],TranscriptAnnot[INTRON(MODIFIER||||417|Scr|protein_coding|CODING|FBtr0081657|2|1);INTRON(MODIFIER||||417|Scr|protein_coding|CODING|FBtr0081658|2|1)]	The gene Sex combs reduced is referred to in FlyBase by the symbol Dmel\Scr (CG1030, FBgn0003339). It is a protein_coding_gene from Drosophila melanogaster. It has 2 annotated transcripts and 2 polypeptides (1 unique). Gene sequence location is 3R:6823120..6849981. It has the cytological map location 84A5. Protein features are: Homeobox domain; Homeobox protein, antennapedia type; Homeobox protei…
FBtr0081657	3R_2658973_SNP	A	G	0.05325	9	160	1.11e-05	0.107554	SiteClass[FBgn0003339|Scr|INTRON|0],TranscriptAnnot[INTRON(MODIFIER||||417|Scr|protein_coding|CODING|FBtr0081657|2|1);INTRON(MODIFIER||||417|Scr|protein_coding|CODING|FBtr0081658|2|1)]	-
FBtr0081658	3R_2658973_SNP	A	G	0.05325	9	160	1.11e-05	0.107554	SiteClass[FBgn0003339|Scr|INTRON|0],TranscriptAnnot[INTRON(MODIFIER||||417|Scr|protein_coding|CODING|FBtr0081657|2|1);INTRON(MODIFIER||||417|Scr|protein_coding|CODING|FBtr0081658|2|1)]	-
FBgn0264090	X_18899282_SNP	A	G	0.0578	10	163	1.12e-05	0.107554	SiteClass[FBgn0264090|CG43759|INTRON|0],TranscriptAnnot[INTRON(MODIFIER||||735|CG43759|protein_coding|CODING|FBtr0331156|4|1);INTRON(MODIFIER||||900|CG43759|protein_coding|CODING|FBtr0331157|4|1);INTRON(MODIFIER||||735|CG43759|protein_coding|CODING|FBtr0332994|4|1);INTRON(MODIFIER||||735|CG43759|protein_coding|CODING|FBtr0343982|3|1)]	This gene is referred to in FlyBase by the symbol Dmel\CG43759 (FBgn0264090). It is a protein_coding_gene from Drosophila melanogaster. It has 4 annotated transcripts and 4 polypeptides (2 unique). Gene sequence location is X:18930335..19028629. It has the cytological map location 17F3-18A2. Its molecular function is unknown. It is involved in the biological process described with: inter-male agg…
FBtr0331156	X_18899282_SNP	A	G	0.0578	10	163	1.12e-05	0.107554	SiteClass[FBgn0264090|CG43759|INTRON|0],TranscriptAnnot[INTRON(MODIFIER||||735|CG43759|protein_coding|CODING|FBtr0331156|4|1);INTRON(MODIFIER||||900|CG43759|protein_coding|CODING|FBtr0331157|4|1);INTRON(MODIFIER||||735|CG43759|protein_coding|CODING|FBtr0332994|4|1);INTRON(MODIFIER||||735|CG43759|protein_coding|CODING|FBtr0343982|3|1)]	-
FBtr0331157	X_18899282_SNP	A	G	0.0578	10	163	1.12e-05	0.107554	SiteClass[FBgn0264090|CG43759|INTRON|0],TranscriptAnnot[INTRON(MODIFIER||||735|CG43759|protein_coding|CODING|FBtr0331156|4|1);INTRON(MODIFIER||||900|CG43759|protein_coding|CODING|FBtr0331157|4|1);INTRON(MODIFIER||||735|CG43759|protein_coding|CODING|FBtr0332994|4|1);INTRON(MODIFIER||||735|CG43759|protein_coding|CODING|FBtr0343982|3|1)]	-
FBtr0332994	X_18899282_SNP	A	G	0.0578	10	163	1.12e-05	0.107554	SiteClass[FBgn0264090|CG43759|INTRON|0],TranscriptAnnot[INTRON(MODIFIER||||735|CG43759|protein_coding|CODING|FBtr0331156|4|1);INTRON(MODIFIER||||900|CG43759|protein_coding|CODING|FBtr0331157|4|1);INTRON(MODIFIER||||735|CG43759|protein_coding|CODING|FBtr0332994|4|1);INTRON(MODIFIER||||735|CG43759|protein_coding|CODING|FBtr0343982|3|1)]	-
FBtr0343982	X_18899282_SNP	A	G	0.0578	10	163	1.12e-05	0.107554	SiteClass[FBgn0264090|CG43759|INTRON|0],TranscriptAnnot[INTRON(MODIFIER||||735|CG43759|protein_coding|CODING|FBtr0331156|4|1);INTRON(MODIFIER||||900|CG43759|protein_coding|CODING|FBtr0331157|4|1);INTRON(MODIFIER||||735|CG43759|protein_coding|CODING|FBtr0332994|4|1);INTRON(MODIFIER||||735|CG43759|protein_coding|CODING|FBtr0343982|3|1)]	-
FBgn0027654	3R_26345709_SNP	A	G	0.05682	10	166	1.14e-05	0.107949	SiteClass[FBgn0027654|jdp|INTRON|0],TranscriptAnnot[INTRON(MODIFIER||||195|jdp|protein_coding|CODING|FBtr0085681|3|1);INTRON(MODIFIER||||182|jdp|protein_coding|CODING|FBtr0085682|3|1);INTRON(MODIFIER||||170|jdp|protein_coding|CODING|FBtr0085683|3|1)]	The gene jdp is referred to in FlyBase by the symbol Dmel\jdp (CG2239, FBgn0027654). It is a protein_coding_gene from Drosophila melanogaster. It has 3 annotated transcripts and 3 polypeptides (all unique). Gene sequence location is 3R:30517059..30527037. It has the cytological map location 99F7. Protein features are: DnaJ domain. Its molecular function is described by: unfolded protein binding. …
FBtr0085681	3R_26345709_SNP	A	G	0.05682	10	166	1.14e-05	0.107949	SiteClass[FBgn0027654|jdp|INTRON|0],TranscriptAnnot[INTRON(MODIFIER||||195|jdp|protein_coding|CODING|FBtr0085681|3|1);INTRON(MODIFIER||||182|jdp|protein_coding|CODING|FBtr0085682|3|1);INTRON(MODIFIER||||170|jdp|protein_coding|CODING|FBtr0085683|3|1)]	-
FBtr0085682	3R_26345709_SNP	A	G	0.05682	10	166	1.14e-05	0.107949	SiteClass[FBgn0027654|jdp|INTRON|0],TranscriptAnnot[INTRON(MODIFIER||||195|jdp|protein_coding|CODING|FBtr0085681|3|1);INTRON(MODIFIER||||182|jdp|protein_coding|CODING|FBtr0085682|3|1);INTRON(MODIFIER||||170|jdp|protein_coding|CODING|FBtr0085683|3|1)]	-
FBtr0085683	3R_26345709_SNP	A	G	0.05682	10	166	1.14e-05	0.107949	SiteClass[FBgn0027654|jdp|INTRON|0],TranscriptAnnot[INTRON(MODIFIER||||195|jdp|protein_coding|CODING|FBtr0085681|3|1);INTRON(MODIFIER||||182|jdp|protein_coding|CODING|FBtr0085682|3|1);INTRON(MODIFIER||||170|jdp|protein_coding|CODING|FBtr0085683|3|1)]	-
FBgn0000497	2L_640496_SNP	G	T	0.3929	66	102	1.15e-05	0.107949	SiteClass[FBgn0000497|ds|UTR_3_PRIME|0],TranscriptAnnot[UTR_3_PRIME(MODIFIER||463||3556|ds|protein_coding|CODING|FBtr0078045|12|1);UTR_3_PRIME(MODIFIER||463||3556|ds|protein_coding|CODING|FBtr0343249|12|1)]	The gene dachsous is referred to in FlyBase by the symbol Dmel\ds (CG17941, FBgn0000497). It is a protein_coding_gene from Drosophila melanogaster. It has 2 annotated transcripts and 2 polypeptides (1 unique). Gene sequence location is 2L:640013..714983. It has the cytological map location 21E2. Protein features are: Cadherin; Cadherin conserved site; Cadherin-like. Its molecular function is desc…
FBtr0078045	2L_640496_SNP	G	T	0.3929	66	102	1.15e-05	0.107949	SiteClass[FBgn0000497|ds|UTR_3_PRIME|0],TranscriptAnnot[UTR_3_PRIME(MODIFIER||463||3556|ds|protein_coding|CODING|FBtr0078045|12|1);UTR_3_PRIME(MODIFIER||463||3556|ds|protein_coding|CODING|FBtr0343249|12|1)]	-
FBtr0343249	2L_640496_SNP	G	T	0.3929	66	102	1.15e-05	0.107949	SiteClass[FBgn0000497|ds|UTR_3_PRIME|0],TranscriptAnnot[UTR_3_PRIME(MODIFIER||463||3556|ds|protein_coding|CODING|FBtr0078045|12|1);UTR_3_PRIME(MODIFIER||463||3556|ds|protein_coding|CODING|FBtr0343249|12|1)]	-
FBgn0001332	2R_10384109_INS	ACAGTCC	A	0.09551	17	161	1.15e-05	0.107949	SiteClass[FBgn0001332|L|INTRON|0;FBgn0024698|Cpsf160|DOWNSTREAM|742],TranscriptAnnot[DOWNSTREAM(MODIFIER||742||1455|Cpsf160|protein_coding|CODING|FBtr0089258||1);INTRON(MODIFIER||||562|L|protein_coding|CODING|FBtr0087492|3|1)]	-
FBgn0024698	2R_10384109_INS	ACAGTCC	A	0.09551	17	161	1.15e-05	0.107949	SiteClass[FBgn0001332|L|INTRON|0;FBgn0024698|Cpsf160|DOWNSTREAM|742],TranscriptAnnot[DOWNSTREAM(MODIFIER||742||1455|Cpsf160|protein_coding|CODING|FBtr0089258||1);INTRON(MODIFIER||||562|L|protein_coding|CODING|FBtr0087492|3|1)]	The gene Cleavage and polyadenylation specificity factor 160 is referred to in FlyBase by the symbol Dmel\Cpsf160 (CG10110, FBgn0024698). It is a protein_coding_gene from Drosophila melanogaster. It has 2 annotated transcripts and 2 polypeptides (all unique). Gene sequence location is 2R:14497347..14503488. It has the cytological map location 51A4. Protein features are: Cleavage/polyadenylation s…
FBtr0089258	2R_10384109_INS	ACAGTCC	A	0.09551	17	161	1.15e-05	0.107949	SiteClass[FBgn0001332|L|INTRON|0;FBgn0024698|Cpsf160|DOWNSTREAM|742],TranscriptAnnot[DOWNSTREAM(MODIFIER||742||1455|Cpsf160|protein_coding|CODING|FBtr0089258||1);INTRON(MODIFIER||||562|L|protein_coding|CODING|FBtr0087492|3|1)]	-
FBtr0087492	2R_10384109_INS	ACAGTCC	A	0.09551	17	161	1.15e-05	0.107949	SiteClass[FBgn0001332|L|INTRON|0;FBgn0024698|Cpsf160|DOWNSTREAM|742],TranscriptAnnot[DOWNSTREAM(MODIFIER||742||1455|Cpsf160|protein_coding|CODING|FBtr0089258||1);INTRON(MODIFIER||||562|L|protein_coding|CODING|FBtr0087492|3|1)]	-
FBgn0004875	3L_3840223_SNP	C	A	0.3503	62	115	1.17e-05	0.109001	SiteClass[FBgn0004875|enc|UTR_3_PRIME|0],TranscriptAnnot[UTR_3_PRIME(MODIFIER||535||1827|enc|protein_coding|CODING|FBtr0333210|12|1);UTR_3_PRIME(MODIFIER||535||1818|enc|protein_coding|CODING|FBtr0073152|12|1);UTR_3_PRIME(MODIFIER||535||1937|enc|protein_coding|CODING|FBtr0112845|13|1);UTR_3_PRIME(MODIFIER||535||1818|enc|protein_coding|CODING|FBtr0112844|12|1);UTR_3_PRIME(MODIFIER||535||1798|enc|pr…	The gene encore is referred to in FlyBase by the symbol Dmel\enc (CG10847, FBgn0004875). It is a protein_coding_gene from Drosophila melanogaster. It has 7 annotated transcripts and 7 polypeptides (6 unique). Gene sequence location is 3L:3818679..3842326. It has the cytological map location 63F1-63F3. Protein features are: R3H domain; SUZ domain. Its molecular function is described by: nucleic ac…
FBtr0333210	3L_3840223_SNP	C	A	0.3503	62	115	1.17e-05	0.109001	SiteClass[FBgn0004875|enc|UTR_3_PRIME|0],TranscriptAnnot[UTR_3_PRIME(MODIFIER||535||1827|enc|protein_coding|CODING|FBtr0333210|12|1);UTR_3_PRIME(MODIFIER||535||1818|enc|protein_coding|CODING|FBtr0073152|12|1);UTR_3_PRIME(MODIFIER||535||1937|enc|protein_coding|CODING|FBtr0112845|13|1);UTR_3_PRIME(MODIFIER||535||1818|enc|protein_coding|CODING|FBtr0112844|12|1);UTR_3_PRIME(MODIFIER||535||1798|enc|pr…	-
FBtr0073152	3L_3840223_SNP	C	A	0.3503	62	115	1.17e-05	0.109001	SiteClass[FBgn0004875|enc|UTR_3_PRIME|0],TranscriptAnnot[UTR_3_PRIME(MODIFIER||535||1827|enc|protein_coding|CODING|FBtr0333210|12|1);UTR_3_PRIME(MODIFIER||535||1818|enc|protein_coding|CODING|FBtr0073152|12|1);UTR_3_PRIME(MODIFIER||535||1937|enc|protein_coding|CODING|FBtr0112845|13|1);UTR_3_PRIME(MODIFIER||535||1818|enc|protein_coding|CODING|FBtr0112844|12|1);UTR_3_PRIME(MODIFIER||535||1798|enc|pr…	-
FBtr0112845	3L_3840223_SNP	C	A	0.3503	62	115	1.17e-05	0.109001	SiteClass[FBgn0004875|enc|UTR_3_PRIME|0],TranscriptAnnot[UTR_3_PRIME(MODIFIER||535||1827|enc|protein_coding|CODING|FBtr0333210|12|1);UTR_3_PRIME(MODIFIER||535||1818|enc|protein_coding|CODING|FBtr0073152|12|1);UTR_3_PRIME(MODIFIER||535||1937|enc|protein_coding|CODING|FBtr0112845|13|1);UTR_3_PRIME(MODIFIER||535||1818|enc|protein_coding|CODING|FBtr0112844|12|1);UTR_3_PRIME(MODIFIER||535||1798|enc|pr…	-
[truncated: 15,308 more rows]

## Sheet: Sheet1
http://nebc.nerc.ac.uk/courses/GeneSpring/GS_Mar2006/Multiple%20testing%20corrections.pdf
