# Supplementary material for: α-amanitin resistance in Drosophila melanogaster: A genome-wide association approach
Source: PLoS One. 2017 Feb 27;12(2):e0173162. doi: 10.1371/journal.pone.0173162 (PMC5328632; doi:10.1371/journal.pone.0173162)
Supplement: S7 Table — A cutoff single mixed p-value of 1.00E-03 was used. (XLSX) [file pone.0173162.s007.xlsx]

## Sheet: result_add_annotation_getID_gwa
Gene_ID	ID	MinorAllele	MajorAllele	MAF	MinorAlleleCount	MajorAlleleCount	SinglePval	SingleMixedPval	180_GWAS_0.2_concentration-Pvalue(FDR)	ID	Unknow	GeneAnnotation	RegulationAnnotation	Gene_ID	Description
FBgn0264908	3L_15862118_SNP	C	G	0.06471	11	159	6.06e-08	5.6e-08	0.0542282	3L_15862118_SNP	G	SiteClass[FBgn0264908|pHCl|INTRON|0],TranscriptAnnot[INTRON(MODIFIER||||754|pHCl|protein_coding|CODING|FBtr0334970|5|1);INTRON(MODIFIER||||762|pHCl|protein_coding|CODING|FBtr0334971|5|1);INTRON(MODIFIER||||637|pHCl|protein_coding|CODING|FBtr0334972|5|1);INTRON(MODIFIER||||737|pHCl|protein_coding|CODING|FBtr0334973|5|1);INTRON(MODIFIER||||762|pHCl|protein_coding|CODING|FBtr0334974|5|1);INTRON(MODI…	-	FBgn0264908	This gene is referred to in FlyBase by the symbol Dmel\pHCl (CG44099, FBgn0264908). It is a protein_coding_gene from Drosophila melanogaster. It has 16 annotated transcripts and 16 polypeptides (all unique). Gene sequence location is 3L:15848578..15899029. It has the cytological map location 72A2. Protein features are: Gamma-aminobutyric acid A receptor/Glycine receptor alpha; Neurotransmitter-ga…
FBtr0334970	3L_15862118_SNP	C	G	0.06471	11	159	6.06e-08	5.6e-08	0.0542282	3L_15862118_SNP	G	SiteClass[FBgn0264908|pHCl|INTRON|0],TranscriptAnnot[INTRON(MODIFIER||||754|pHCl|protein_coding|CODING|FBtr0334970|5|1);INTRON(MODIFIER||||762|pHCl|protein_coding|CODING|FBtr0334971|5|1);INTRON(MODIFIER||||637|pHCl|protein_coding|CODING|FBtr0334972|5|1);INTRON(MODIFIER||||737|pHCl|protein_coding|CODING|FBtr0334973|5|1);INTRON(MODIFIER||||762|pHCl|protein_coding|CODING|FBtr0334974|5|1);INTRON(MODI…	-
FBtr0334971	3L_15862118_SNP	C	G	0.06471	11	159	6.06e-08	5.6e-08	0.0542282	3L_15862118_SNP	G	SiteClass[FBgn0264908|pHCl|INTRON|0],TranscriptAnnot[INTRON(MODIFIER||||754|pHCl|protein_coding|CODING|FBtr0334970|5|1);INTRON(MODIFIER||||762|pHCl|protein_coding|CODING|FBtr0334971|5|1);INTRON(MODIFIER||||637|pHCl|protein_coding|CODING|FBtr0334972|5|1);INTRON(MODIFIER||||737|pHCl|protein_coding|CODING|FBtr0334973|5|1);INTRON(MODIFIER||||762|pHCl|protein_coding|CODING|FBtr0334974|5|1);INTRON(MODI…	-
FBtr0334972	3L_15862118_SNP	C	G	0.06471	11	159	6.06e-08	5.6e-08	0.0542282	3L_15862118_SNP	G	SiteClass[FBgn0264908|pHCl|INTRON|0],TranscriptAnnot[INTRON(MODIFIER||||754|pHCl|protein_coding|CODING|FBtr0334970|5|1);INTRON(MODIFIER||||762|pHCl|protein_coding|CODING|FBtr0334971|5|1);INTRON(MODIFIER||||637|pHCl|protein_coding|CODING|FBtr0334972|5|1);INTRON(MODIFIER||||737|pHCl|protein_coding|CODING|FBtr0334973|5|1);INTRON(MODIFIER||||762|pHCl|protein_coding|CODING|FBtr0334974|5|1);INTRON(MODI…	-
FBtr0334973	3L_15862118_SNP	C	G	0.06471	11	159	6.06e-08	5.6e-08	0.0542282	3L_15862118_SNP	G	SiteClass[FBgn0264908|pHCl|INTRON|0],TranscriptAnnot[INTRON(MODIFIER||||754|pHCl|protein_coding|CODING|FBtr0334970|5|1);INTRON(MODIFIER||||762|pHCl|protein_coding|CODING|FBtr0334971|5|1);INTRON(MODIFIER||||637|pHCl|protein_coding|CODING|FBtr0334972|5|1);INTRON(MODIFIER||||737|pHCl|protein_coding|CODING|FBtr0334973|5|1);INTRON(MODIFIER||||762|pHCl|protein_coding|CODING|FBtr0334974|5|1);INTRON(MODI…	-
FBtr0334974	3L_15862118_SNP	C	G	0.06471	11	159	6.06e-08	5.6e-08	0.0542282	3L_15862118_SNP	G	SiteClass[FBgn0264908|pHCl|INTRON|0],TranscriptAnnot[INTRON(MODIFIER||||754|pHCl|protein_coding|CODING|FBtr0334970|5|1);INTRON(MODIFIER||||762|pHCl|protein_coding|CODING|FBtr0334971|5|1);INTRON(MODIFIER||||637|pHCl|protein_coding|CODING|FBtr0334972|5|1);INTRON(MODIFIER||||737|pHCl|protein_coding|CODING|FBtr0334973|5|1);INTRON(MODIFIER||||762|pHCl|protein_coding|CODING|FBtr0334974|5|1);INTRON(MODI…	-
FBtr0334975	3L_15862118_SNP	C	G	0.06471	11	159	6.06e-08	5.6e-08	0.0542282	3L_15862118_SNP	G	SiteClass[FBgn0264908|pHCl|INTRON|0],TranscriptAnnot[INTRON(MODIFIER||||754|pHCl|protein_coding|CODING|FBtr0334970|5|1);INTRON(MODIFIER||||762|pHCl|protein_coding|CODING|FBtr0334971|5|1);INTRON(MODIFIER||||637|pHCl|protein_coding|CODING|FBtr0334972|5|1);INTRON(MODIFIER||||737|pHCl|protein_coding|CODING|FBtr0334973|5|1);INTRON(MODIFIER||||762|pHCl|protein_coding|CODING|FBtr0334974|5|1);INTRON(MODI…	-
FBtr0334976	3L_15862118_SNP	C	G	0.06471	11	159	6.06e-08	5.6e-08	0.0542282	3L_15862118_SNP	G	SiteClass[FBgn0264908|pHCl|INTRON|0],TranscriptAnnot[INTRON(MODIFIER||||754|pHCl|protein_coding|CODING|FBtr0334970|5|1);INTRON(MODIFIER||||762|pHCl|protein_coding|CODING|FBtr0334971|5|1);INTRON(MODIFIER||||637|pHCl|protein_coding|CODING|FBtr0334972|5|1);INTRON(MODIFIER||||737|pHCl|protein_coding|CODING|FBtr0334973|5|1);INTRON(MODIFIER||||762|pHCl|protein_coding|CODING|FBtr0334974|5|1);INTRON(MODI…	-
FBtr0334981	3L_15862118_SNP	C	G	0.06471	11	159	6.06e-08	5.6e-08	0.0542282	3L_15862118_SNP	G	SiteClass[FBgn0264908|pHCl|INTRON|0],TranscriptAnnot[INTRON(MODIFIER||||754|pHCl|protein_coding|CODING|FBtr0334970|5|1);INTRON(MODIFIER||||762|pHCl|protein_coding|CODING|FBtr0334971|5|1);INTRON(MODIFIER||||637|pHCl|protein_coding|CODING|FBtr0334972|5|1);INTRON(MODIFIER||||737|pHCl|protein_coding|CODING|FBtr0334973|5|1);INTRON(MODIFIER||||762|pHCl|protein_coding|CODING|FBtr0334974|5|1);INTRON(MODI…	-
FBtr0343801	3L_15862118_SNP	C	G	0.06471	11	159	6.06e-08	5.6e-08	0.0542282	3L_15862118_SNP	G	SiteClass[FBgn0264908|pHCl|INTRON|0],TranscriptAnnot[INTRON(MODIFIER||||754|pHCl|protein_coding|CODING|FBtr0334970|5|1);INTRON(MODIFIER||||762|pHCl|protein_coding|CODING|FBtr0334971|5|1);INTRON(MODIFIER||||637|pHCl|protein_coding|CODING|FBtr0334972|5|1);INTRON(MODIFIER||||737|pHCl|protein_coding|CODING|FBtr0334973|5|1);INTRON(MODIFIER||||762|pHCl|protein_coding|CODING|FBtr0334974|5|1);INTRON(MODI…	-
FBtr0334977	3L_15862118_SNP	C	G	0.06471	11	159	6.06e-08	5.6e-08	0.0542282	3L_15862118_SNP	G	SiteClass[FBgn0264908|pHCl|INTRON|0],TranscriptAnnot[INTRON(MODIFIER||||754|pHCl|protein_coding|CODING|FBtr0334970|5|1);INTRON(MODIFIER||||762|pHCl|protein_coding|CODING|FBtr0334971|5|1);INTRON(MODIFIER||||637|pHCl|protein_coding|CODING|FBtr0334972|5|1);INTRON(MODIFIER||||737|pHCl|protein_coding|CODING|FBtr0334973|5|1);INTRON(MODIFIER||||762|pHCl|protein_coding|CODING|FBtr0334974|5|1);INTRON(MODI…	-
FBtr0334978	3L_15862118_SNP	C	G	0.06471	11	159	6.06e-08	5.6e-08	0.0542282	3L_15862118_SNP	G	SiteClass[FBgn0264908|pHCl|INTRON|0],TranscriptAnnot[INTRON(MODIFIER||||754|pHCl|protein_coding|CODING|FBtr0334970|5|1);INTRON(MODIFIER||||762|pHCl|protein_coding|CODING|FBtr0334971|5|1);INTRON(MODIFIER||||637|pHCl|protein_coding|CODING|FBtr0334972|5|1);INTRON(MODIFIER||||737|pHCl|protein_coding|CODING|FBtr0334973|5|1);INTRON(MODIFIER||||762|pHCl|protein_coding|CODING|FBtr0334974|5|1);INTRON(MODI…	-
FBtr0334979	3L_15862118_SNP	C	G	0.06471	11	159	6.06e-08	5.6e-08	0.0542282	3L_15862118_SNP	G	SiteClass[FBgn0264908|pHCl|INTRON|0],TranscriptAnnot[INTRON(MODIFIER||||754|pHCl|protein_coding|CODING|FBtr0334970|5|1);INTRON(MODIFIER||||762|pHCl|protein_coding|CODING|FBtr0334971|5|1);INTRON(MODIFIER||||637|pHCl|protein_coding|CODING|FBtr0334972|5|1);INTRON(MODIFIER||||737|pHCl|protein_coding|CODING|FBtr0334973|5|1);INTRON(MODIFIER||||762|pHCl|protein_coding|CODING|FBtr0334974|5|1);INTRON(MODI…	-
FBtr0334980	3L_15862118_SNP	C	G	0.06471	11	159	6.06e-08	5.6e-08	0.0542282	3L_15862118_SNP	G	SiteClass[FBgn0264908|pHCl|INTRON|0],TranscriptAnnot[INTRON(MODIFIER||||754|pHCl|protein_coding|CODING|FBtr0334970|5|1);INTRON(MODIFIER||||762|pHCl|protein_coding|CODING|FBtr0334971|5|1);INTRON(MODIFIER||||637|pHCl|protein_coding|CODING|FBtr0334972|5|1);INTRON(MODIFIER||||737|pHCl|protein_coding|CODING|FBtr0334973|5|1);INTRON(MODIFIER||||762|pHCl|protein_coding|CODING|FBtr0334974|5|1);INTRON(MODI…	-
FBtr0334982	3L_15862118_SNP	C	G	0.06471	11	159	6.06e-08	5.6e-08	0.0542282	3L_15862118_SNP	G	SiteClass[FBgn0264908|pHCl|INTRON|0],TranscriptAnnot[INTRON(MODIFIER||||754|pHCl|protein_coding|CODING|FBtr0334970|5|1);INTRON(MODIFIER||||762|pHCl|protein_coding|CODING|FBtr0334971|5|1);INTRON(MODIFIER||||637|pHCl|protein_coding|CODING|FBtr0334972|5|1);INTRON(MODIFIER||||737|pHCl|protein_coding|CODING|FBtr0334973|5|1);INTRON(MODIFIER||||762|pHCl|protein_coding|CODING|FBtr0334974|5|1);INTRON(MODI…	-
FBtr0334983	3L_15862118_SNP	C	G	0.06471	11	159	6.06e-08	5.6e-08	0.0542282	3L_15862118_SNP	G	SiteClass[FBgn0264908|pHCl|INTRON|0],TranscriptAnnot[INTRON(MODIFIER||||754|pHCl|protein_coding|CODING|FBtr0334970|5|1);INTRON(MODIFIER||||762|pHCl|protein_coding|CODING|FBtr0334971|5|1);INTRON(MODIFIER||||637|pHCl|protein_coding|CODING|FBtr0334972|5|1);INTRON(MODIFIER||||737|pHCl|protein_coding|CODING|FBtr0334973|5|1);INTRON(MODIFIER||||762|pHCl|protein_coding|CODING|FBtr0334974|5|1);INTRON(MODI…	-
FBtr0343800	3L_15862118_SNP	C	G	0.06471	11	159	6.06e-08	5.6e-08	0.0542282	3L_15862118_SNP	G	SiteClass[FBgn0264908|pHCl|INTRON|0],TranscriptAnnot[INTRON(MODIFIER||||754|pHCl|protein_coding|CODING|FBtr0334970|5|1);INTRON(MODIFIER||||762|pHCl|protein_coding|CODING|FBtr0334971|5|1);INTRON(MODIFIER||||637|pHCl|protein_coding|CODING|FBtr0334972|5|1);INTRON(MODIFIER||||737|pHCl|protein_coding|CODING|FBtr0334973|5|1);INTRON(MODIFIER||||762|pHCl|protein_coding|CODING|FBtr0334974|5|1);INTRON(MODI…	-
FBgn0264908	3L_15862112_SNP	A	C	0.06509	11	158	6.7e-08	5.67e-08	0.0542282	3L_15862112_SNP	C	SiteClass[FBgn0264908|pHCl|INTRON|0],TranscriptAnnot[INTRON(MODIFIER||||754|pHCl|protein_coding|CODING|FBtr0334970|5|1);INTRON(MODIFIER||||762|pHCl|protein_coding|CODING|FBtr0334971|5|1);INTRON(MODIFIER||||637|pHCl|protein_coding|CODING|FBtr0334972|5|1);INTRON(MODIFIER||||737|pHCl|protein_coding|CODING|FBtr0334973|5|1);INTRON(MODIFIER||||762|pHCl|protein_coding|CODING|FBtr0334974|5|1);INTRON(MODI…	-	FBgn0264908	This gene is referred to in FlyBase by the symbol Dmel\pHCl (CG44099, FBgn0264908). It is a protein_coding_gene from Drosophila melanogaster. It has 16 annotated transcripts and 16 polypeptides (all unique). Gene sequence location is 3L:15848578..15899029. It has the cytological map location 72A2. Protein features are: Gamma-aminobutyric acid A receptor/Glycine receptor alpha; Neurotransmitter-ga…
FBtr0334970	3L_15862112_SNP	A	C	0.06509	11	158	6.7e-08	5.67e-08	0.0542282	3L_15862112_SNP	C	SiteClass[FBgn0264908|pHCl|INTRON|0],TranscriptAnnot[INTRON(MODIFIER||||754|pHCl|protein_coding|CODING|FBtr0334970|5|1);INTRON(MODIFIER||||762|pHCl|protein_coding|CODING|FBtr0334971|5|1);INTRON(MODIFIER||||637|pHCl|protein_coding|CODING|FBtr0334972|5|1);INTRON(MODIFIER||||737|pHCl|protein_coding|CODING|FBtr0334973|5|1);INTRON(MODIFIER||||762|pHCl|protein_coding|CODING|FBtr0334974|5|1);INTRON(MODI…	-
FBtr0334971	3L_15862112_SNP	A	C	0.06509	11	158	6.7e-08	5.67e-08	0.0542282	3L_15862112_SNP	C	SiteClass[FBgn0264908|pHCl|INTRON|0],TranscriptAnnot[INTRON(MODIFIER||||754|pHCl|protein_coding|CODING|FBtr0334970|5|1);INTRON(MODIFIER||||762|pHCl|protein_coding|CODING|FBtr0334971|5|1);INTRON(MODIFIER||||637|pHCl|protein_coding|CODING|FBtr0334972|5|1);INTRON(MODIFIER||||737|pHCl|protein_coding|CODING|FBtr0334973|5|1);INTRON(MODIFIER||||762|pHCl|protein_coding|CODING|FBtr0334974|5|1);INTRON(MODI…	-
FBtr0334972	3L_15862112_SNP	A	C	0.06509	11	158	6.7e-08	5.67e-08	0.0542282	3L_15862112_SNP	C	SiteClass[FBgn0264908|pHCl|INTRON|0],TranscriptAnnot[INTRON(MODIFIER||||754|pHCl|protein_coding|CODING|FBtr0334970|5|1);INTRON(MODIFIER||||762|pHCl|protein_coding|CODING|FBtr0334971|5|1);INTRON(MODIFIER||||637|pHCl|protein_coding|CODING|FBtr0334972|5|1);INTRON(MODIFIER||||737|pHCl|protein_coding|CODING|FBtr0334973|5|1);INTRON(MODIFIER||||762|pHCl|protein_coding|CODING|FBtr0334974|5|1);INTRON(MODI…	-
FBtr0334973	3L_15862112_SNP	A	C	0.06509	11	158	6.7e-08	5.67e-08	0.0542282	3L_15862112_SNP	C	SiteClass[FBgn0264908|pHCl|INTRON|0],TranscriptAnnot[INTRON(MODIFIER||||754|pHCl|protein_coding|CODING|FBtr0334970|5|1);INTRON(MODIFIER||||762|pHCl|protein_coding|CODING|FBtr0334971|5|1);INTRON(MODIFIER||||637|pHCl|protein_coding|CODING|FBtr0334972|5|1);INTRON(MODIFIER||||737|pHCl|protein_coding|CODING|FBtr0334973|5|1);INTRON(MODIFIER||||762|pHCl|protein_coding|CODING|FBtr0334974|5|1);INTRON(MODI…	-
FBtr0334974	3L_15862112_SNP	A	C	0.06509	11	158	6.7e-08	5.67e-08	0.0542282	3L_15862112_SNP	C	SiteClass[FBgn0264908|pHCl|INTRON|0],TranscriptAnnot[INTRON(MODIFIER||||754|pHCl|protein_coding|CODING|FBtr0334970|5|1);INTRON(MODIFIER||||762|pHCl|protein_coding|CODING|FBtr0334971|5|1);INTRON(MODIFIER||||637|pHCl|protein_coding|CODING|FBtr0334972|5|1);INTRON(MODIFIER||||737|pHCl|protein_coding|CODING|FBtr0334973|5|1);INTRON(MODIFIER||||762|pHCl|protein_coding|CODING|FBtr0334974|5|1);INTRON(MODI…	-
FBtr0334975	3L_15862112_SNP	A	C	0.06509	11	158	6.7e-08	5.67e-08	0.0542282	3L_15862112_SNP	C	SiteClass[FBgn0264908|pHCl|INTRON|0],TranscriptAnnot[INTRON(MODIFIER||||754|pHCl|protein_coding|CODING|FBtr0334970|5|1);INTRON(MODIFIER||||762|pHCl|protein_coding|CODING|FBtr0334971|5|1);INTRON(MODIFIER||||637|pHCl|protein_coding|CODING|FBtr0334972|5|1);INTRON(MODIFIER||||737|pHCl|protein_coding|CODING|FBtr0334973|5|1);INTRON(MODIFIER||||762|pHCl|protein_coding|CODING|FBtr0334974|5|1);INTRON(MODI…	-
FBtr0334976	3L_15862112_SNP	A	C	0.06509	11	158	6.7e-08	5.67e-08	0.0542282	3L_15862112_SNP	C	SiteClass[FBgn0264908|pHCl|INTRON|0],TranscriptAnnot[INTRON(MODIFIER||||754|pHCl|protein_coding|CODING|FBtr0334970|5|1);INTRON(MODIFIER||||762|pHCl|protein_coding|CODING|FBtr0334971|5|1);INTRON(MODIFIER||||637|pHCl|protein_coding|CODING|FBtr0334972|5|1);INTRON(MODIFIER||||737|pHCl|protein_coding|CODING|FBtr0334973|5|1);INTRON(MODIFIER||||762|pHCl|protein_coding|CODING|FBtr0334974|5|1);INTRON(MODI…	-
FBtr0334981	3L_15862112_SNP	A	C	0.06509	11	158	6.7e-08	5.67e-08	0.0542282	3L_15862112_SNP	C	SiteClass[FBgn0264908|pHCl|INTRON|0],TranscriptAnnot[INTRON(MODIFIER||||754|pHCl|protein_coding|CODING|FBtr0334970|5|1);INTRON(MODIFIER||||762|pHCl|protein_coding|CODING|FBtr0334971|5|1);INTRON(MODIFIER||||637|pHCl|protein_coding|CODING|FBtr0334972|5|1);INTRON(MODIFIER||||737|pHCl|protein_coding|CODING|FBtr0334973|5|1);INTRON(MODIFIER||||762|pHCl|protein_coding|CODING|FBtr0334974|5|1);INTRON(MODI…	-
FBtr0343801	3L_15862112_SNP	A	C	0.06509	11	158	6.7e-08	5.67e-08	0.0542282	3L_15862112_SNP	C	SiteClass[FBgn0264908|pHCl|INTRON|0],TranscriptAnnot[INTRON(MODIFIER||||754|pHCl|protein_coding|CODING|FBtr0334970|5|1);INTRON(MODIFIER||||762|pHCl|protein_coding|CODING|FBtr0334971|5|1);INTRON(MODIFIER||||637|pHCl|protein_coding|CODING|FBtr0334972|5|1);INTRON(MODIFIER||||737|pHCl|protein_coding|CODING|FBtr0334973|5|1);INTRON(MODIFIER||||762|pHCl|protein_coding|CODING|FBtr0334974|5|1);INTRON(MODI…	-
FBtr0334977	3L_15862112_SNP	A	C	0.06509	11	158	6.7e-08	5.67e-08	0.0542282	3L_15862112_SNP	C	SiteClass[FBgn0264908|pHCl|INTRON|0],TranscriptAnnot[INTRON(MODIFIER||||754|pHCl|protein_coding|CODING|FBtr0334970|5|1);INTRON(MODIFIER||||762|pHCl|protein_coding|CODING|FBtr0334971|5|1);INTRON(MODIFIER||||637|pHCl|protein_coding|CODING|FBtr0334972|5|1);INTRON(MODIFIER||||737|pHCl|protein_coding|CODING|FBtr0334973|5|1);INTRON(MODIFIER||||762|pHCl|protein_coding|CODING|FBtr0334974|5|1);INTRON(MODI…	-
FBtr0334978	3L_15862112_SNP	A	C	0.06509	11	158	6.7e-08	5.67e-08	0.0542282	3L_15862112_SNP	C	SiteClass[FBgn0264908|pHCl|INTRON|0],TranscriptAnnot[INTRON(MODIFIER||||754|pHCl|protein_coding|CODING|FBtr0334970|5|1);INTRON(MODIFIER||||762|pHCl|protein_coding|CODING|FBtr0334971|5|1);INTRON(MODIFIER||||637|pHCl|protein_coding|CODING|FBtr0334972|5|1);INTRON(MODIFIER||||737|pHCl|protein_coding|CODING|FBtr0334973|5|1);INTRON(MODIFIER||||762|pHCl|protein_coding|CODING|FBtr0334974|5|1);INTRON(MODI…	-
FBtr0334979	3L_15862112_SNP	A	C	0.06509	11	158	6.7e-08	5.67e-08	0.0542282	3L_15862112_SNP	C	SiteClass[FBgn0264908|pHCl|INTRON|0],TranscriptAnnot[INTRON(MODIFIER||||754|pHCl|protein_coding|CODING|FBtr0334970|5|1);INTRON(MODIFIER||||762|pHCl|protein_coding|CODING|FBtr0334971|5|1);INTRON(MODIFIER||||637|pHCl|protein_coding|CODING|FBtr0334972|5|1);INTRON(MODIFIER||||737|pHCl|protein_coding|CODING|FBtr0334973|5|1);INTRON(MODIFIER||||762|pHCl|protein_coding|CODING|FBtr0334974|5|1);INTRON(MODI…	-
FBtr0334980	3L_15862112_SNP	A	C	0.06509	11	158	6.7e-08	5.67e-08	0.0542282	3L_15862112_SNP	C	SiteClass[FBgn0264908|pHCl|INTRON|0],TranscriptAnnot[INTRON(MODIFIER||||754|pHCl|protein_coding|CODING|FBtr0334970|5|1);INTRON(MODIFIER||||762|pHCl|protein_coding|CODING|FBtr0334971|5|1);INTRON(MODIFIER||||637|pHCl|protein_coding|CODING|FBtr0334972|5|1);INTRON(MODIFIER||||737|pHCl|protein_coding|CODING|FBtr0334973|5|1);INTRON(MODIFIER||||762|pHCl|protein_coding|CODING|FBtr0334974|5|1);INTRON(MODI…	-
FBtr0334982	3L_15862112_SNP	A	C	0.06509	11	158	6.7e-08	5.67e-08	0.0542282	3L_15862112_SNP	C	SiteClass[FBgn0264908|pHCl|INTRON|0],TranscriptAnnot[INTRON(MODIFIER||||754|pHCl|protein_coding|CODING|FBtr0334970|5|1);INTRON(MODIFIER||||762|pHCl|protein_coding|CODING|FBtr0334971|5|1);INTRON(MODIFIER||||637|pHCl|protein_coding|CODING|FBtr0334972|5|1);INTRON(MODIFIER||||737|pHCl|protein_coding|CODING|FBtr0334973|5|1);INTRON(MODIFIER||||762|pHCl|protein_coding|CODING|FBtr0334974|5|1);INTRON(MODI…	-
FBtr0334983	3L_15862112_SNP	A	C	0.06509	11	158	6.7e-08	5.67e-08	0.0542282	3L_15862112_SNP	C	SiteClass[FBgn0264908|pHCl|INTRON|0],TranscriptAnnot[INTRON(MODIFIER||||754|pHCl|protein_coding|CODING|FBtr0334970|5|1);INTRON(MODIFIER||||762|pHCl|protein_coding|CODING|FBtr0334971|5|1);INTRON(MODIFIER||||637|pHCl|protein_coding|CODING|FBtr0334972|5|1);INTRON(MODIFIER||||737|pHCl|protein_coding|CODING|FBtr0334973|5|1);INTRON(MODIFIER||||762|pHCl|protein_coding|CODING|FBtr0334974|5|1);INTRON(MODI…	-
FBtr0343800	3L_15862112_SNP	A	C	0.06509	11	158	6.7e-08	5.67e-08	0.0542282	3L_15862112_SNP	C	SiteClass[FBgn0264908|pHCl|INTRON|0],TranscriptAnnot[INTRON(MODIFIER||||754|pHCl|protein_coding|CODING|FBtr0334970|5|1);INTRON(MODIFIER||||762|pHCl|protein_coding|CODING|FBtr0334971|5|1);INTRON(MODIFIER||||637|pHCl|protein_coding|CODING|FBtr0334972|5|1);INTRON(MODIFIER||||737|pHCl|protein_coding|CODING|FBtr0334973|5|1);INTRON(MODIFIER||||762|pHCl|protein_coding|CODING|FBtr0334974|5|1);INTRON(MODI…	-
FBgn0250867	2L_21052421_SNP	C	A	0.2195	36	128	2.38e-06	1.25e-06	0.413437	2L_21052421_SNP	A	SiteClass[FBgn0250867|CG42238|UPSTREAM|257;FBgn0010395|Itgbetanu|UPSTREAM|612],TranscriptAnnot[UPSTREAM(MODIFIER||438||148|CG42238|protein_coding|CODING|FBtr0290305||1);UPSTREAM(MODIFIER||612||799|Itgbetanu|protein_coding|CODING|FBtr0081461||1);UPSTREAM(MODIFIER||257||100|CG42238|protein_coding|CODING|FBtr0331199||1);INTERGENIC(MODIFIER||||||||||1)]	(TF_binding_site|BDTNP1_TFBS_dl|FBsf0000299727);(TF_binding_site|BDTNP1_TFBS_hb|FBsf0000290978);(TF_binding_site|BDTNP1_TFBS_Med|FBsf0000279129);(TF_binding_site|mE1_TFBS_cad|FBsf0000242529);(TF_binding_site|mE1_TFBS_HSA|FBsf0000352989);(TF_binding_site|mE1_TFBS_Kr|FBsf0000253344);(TF_binding_site|mE1_TFBS_Ubx|FBsf0000261973)	FBgn0250867	This	gene	is	referred	to	in	FlyBase	by	the	symbol	Dmel\CG42238	(FBgn0250867).	It	is	a	protein_coding_gene	from	Drosophila	melanogaster.	It	has	5	annotated	transcripts	and	5	polypeptides	(2	unique).	Gene	sequence	location	is	2L:20965520..21052164.	It
FBgn0010395	2L_21052421_SNP	C	A	0.2195	36	128	2.38e-06	1.25e-06	0.413437	2L_21052421_SNP	A	SiteClass[FBgn0250867|CG42238|UPSTREAM|257;FBgn0010395|Itgbetanu|UPSTREAM|612],TranscriptAnnot[UPSTREAM(MODIFIER||438||148|CG42238|protein_coding|CODING|FBtr0290305||1);UPSTREAM(MODIFIER||612||799|Itgbetanu|protein_coding|CODING|FBtr0081461||1);UPSTREAM(MODIFIER||257||100|CG42238|protein_coding|CODING|FBtr0331199||1);INTERGENIC(MODIFIER||||||||||1)]	(TF_binding_site|BDTNP1_TFBS_dl|FBsf0000299727);(TF_binding_site|BDTNP1_TFBS_hb|FBsf0000290978);(TF_binding_site|BDTNP1_TFBS_Med|FBsf0000279129);(TF_binding_site|mE1_TFBS_cad|FBsf0000242529);(TF_binding_site|mE1_TFBS_HSA|FBsf0000352989);(TF_binding_site|mE1_TFBS_Kr|FBsf0000253344);(TF_binding_site|mE1_TFBS_Ubx|FBsf0000261973)	FBgn0010395	The gene Integrin betanu subunit is referred to in FlyBase by the symbol Dmel\Itgbn (CG1762, FBgn0010395). It is a protein_coding_gene from Drosophila melanogaster. It has 2 annotated transcripts and 2 polypeptides (1 unique). Gene sequence location is 2L:21053033..21058044. It has the cytological map location 39A1. Protein features are: EGF-like domain; EGF-like domain, extracellular; EGF-like, …
FBtr0290305	2L_21052421_SNP	C	A	0.2195	36	128	2.38e-06	1.25e-06	0.413437	2L_21052421_SNP	A	SiteClass[FBgn0250867|CG42238|UPSTREAM|257;FBgn0010395|Itgbetanu|UPSTREAM|612],TranscriptAnnot[UPSTREAM(MODIFIER||438||148|CG42238|protein_coding|CODING|FBtr0290305||1);UPSTREAM(MODIFIER||612||799|Itgbetanu|protein_coding|CODING|FBtr0081461||1);UPSTREAM(MODIFIER||257||100|CG42238|protein_coding|CODING|FBtr0331199||1);INTERGENIC(MODIFIER||||||||||1)]	(TF_binding_site|BDTNP1_TFBS_dl|FBsf0000299727);(TF_binding_site|BDTNP1_TFBS_hb|FBsf0000290978);(TF_binding_site|BDTNP1_TFBS_Med|FBsf0000279129);(TF_binding_site|mE1_TFBS_cad|FBsf0000242529);(TF_binding_site|mE1_TFBS_HSA|FBsf0000352989);(TF_binding_site|mE1_TFBS_Kr|FBsf0000253344);(TF_binding_site|mE1_TFBS_Ubx|FBsf0000261973)
FBtr0081461	2L_21052421_SNP	C	A	0.2195	36	128	2.38e-06	1.25e-06	0.413437	2L_21052421_SNP	A	SiteClass[FBgn0250867|CG42238|UPSTREAM|257;FBgn0010395|Itgbetanu|UPSTREAM|612],TranscriptAnnot[UPSTREAM(MODIFIER||438||148|CG42238|protein_coding|CODING|FBtr0290305||1);UPSTREAM(MODIFIER||612||799|Itgbetanu|protein_coding|CODING|FBtr0081461||1);UPSTREAM(MODIFIER||257||100|CG42238|protein_coding|CODING|FBtr0331199||1);INTERGENIC(MODIFIER||||||||||1)]	(TF_binding_site|BDTNP1_TFBS_dl|FBsf0000299727);(TF_binding_site|BDTNP1_TFBS_hb|FBsf0000290978);(TF_binding_site|BDTNP1_TFBS_Med|FBsf0000279129);(TF_binding_site|mE1_TFBS_cad|FBsf0000242529);(TF_binding_site|mE1_TFBS_HSA|FBsf0000352989);(TF_binding_site|mE1_TFBS_Kr|FBsf0000253344);(TF_binding_site|mE1_TFBS_Ubx|FBsf0000261973)
FBtr0331199	2L_21052421_SNP	C	A	0.2195	36	128	2.38e-06	1.25e-06	0.413437	2L_21052421_SNP	A	SiteClass[FBgn0250867|CG42238|UPSTREAM|257;FBgn0010395|Itgbetanu|UPSTREAM|612],TranscriptAnnot[UPSTREAM(MODIFIER||438||148|CG42238|protein_coding|CODING|FBtr0290305||1);UPSTREAM(MODIFIER||612||799|Itgbetanu|protein_coding|CODING|FBtr0081461||1);UPSTREAM(MODIFIER||257||100|CG42238|protein_coding|CODING|FBtr0331199||1);INTERGENIC(MODIFIER||||||||||1)]	(TF_binding_site|BDTNP1_TFBS_dl|FBsf0000299727);(TF_binding_site|BDTNP1_TFBS_hb|FBsf0000290978);(TF_binding_site|BDTNP1_TFBS_Med|FBsf0000279129);(TF_binding_site|mE1_TFBS_cad|FBsf0000242529);(TF_binding_site|mE1_TFBS_HSA|FBsf0000352989);(TF_binding_site|mE1_TFBS_Kr|FBsf0000253344);(TF_binding_site|mE1_TFBS_Ubx|FBsf0000261973)
FBgn0005775	3L_4969182_SNP	C	A	0.1131	19	149	1.02e-06	1.28e-06	0.413437	3L_4969182_SNP	C	SiteClass[FBgn0005775|Con|INTRON|0],TranscriptAnnot[INTRON(MODIFIER||||691|Con|protein_coding|CODING|FBtr0073375|1|1);INTRON(MODIFIER||||691|Con|protein_coding|CODING|FBtr0309972|4|1)]	(TF_binding_site|BDTNP1_TFBS_dl|FBsf0000305683);(TF_binding_site|mE1_TFBS_HSA|FBsf0000362280)	FBgn0005775	The gene Connectin is referred to in FlyBase by the symbol Dmel\Con (CG7503, FBgn0005775). It is a protein_coding_gene from Drosophila melanogaster. It has 2 annotated transcripts and 2 polypeptides (1 unique). Gene sequence location is 3L:4936758..5079033. It has the cytological map location 64C2-64C5. Protein features are: Cysteine-rich flanking region, C-terminal; Leucine-rich repeat; Leucine-…
FBtr0073375	3L_4969182_SNP	C	A	0.1131	19	149	1.02e-06	1.28e-06	0.413437	3L_4969182_SNP	C	SiteClass[FBgn0005775|Con|INTRON|0],TranscriptAnnot[INTRON(MODIFIER||||691|Con|protein_coding|CODING|FBtr0073375|1|1);INTRON(MODIFIER||||691|Con|protein_coding|CODING|FBtr0309972|4|1)]	(TF_binding_site|BDTNP1_TFBS_dl|FBsf0000305683);(TF_binding_site|mE1_TFBS_HSA|FBsf0000362280)
FBtr0309972	3L_4969182_SNP	C	A	0.1131	19	149	1.02e-06	1.28e-06	0.413437	3L_4969182_SNP	C	SiteClass[FBgn0005775|Con|INTRON|0],TranscriptAnnot[INTRON(MODIFIER||||691|Con|protein_coding|CODING|FBtr0073375|1|1);INTRON(MODIFIER||||691|Con|protein_coding|CODING|FBtr0309972|4|1)]	(TF_binding_site|BDTNP1_TFBS_dl|FBsf0000305683);(TF_binding_site|mE1_TFBS_HSA|FBsf0000362280)
FBgn0003138	3L_1392582_SNP	C	T	0.08523	15	161	1.55e-06	1.3e-06	0.413437	3L_1392582_SNP	T	SiteClass[FBgn0003138|Ptp61F|INTRON|0],TranscriptAnnot[INTRON(MODIFIER||||530|Ptp61F|protein_coding|CODING|FBtr0072716|1|1);INTRON(MODIFIER||||431|Ptp61F|protein_coding|CODING|FBtr0310161|3|1)]	(TF_binding_site|mE1_TFBS_cad|FBsf0000243952)
FBtr0072716	3L_1392582_SNP	C	T	0.08523	15	161	1.55e-06	1.3e-06	0.413437	3L_1392582_SNP	T	SiteClass[FBgn0003138|Ptp61F|INTRON|0],TranscriptAnnot[INTRON(MODIFIER||||530|Ptp61F|protein_coding|CODING|FBtr0072716|1|1);INTRON(MODIFIER||||431|Ptp61F|protein_coding|CODING|FBtr0310161|3|1)]	(TF_binding_site|mE1_TFBS_cad|FBsf0000243952)
FBtr0310161	3L_1392582_SNP	C	T	0.08523	15	161	1.55e-06	1.3e-06	0.413437	3L_1392582_SNP	T	SiteClass[FBgn0003138|Ptp61F|INTRON|0],TranscriptAnnot[INTRON(MODIFIER||||530|Ptp61F|protein_coding|CODING|FBtr0072716|1|1);INTRON(MODIFIER||||431|Ptp61F|protein_coding|CODING|FBtr0310161|3|1)]	(TF_binding_site|mE1_TFBS_cad|FBsf0000243952)
FBgn0266429	X_3480882_SNP	A	G	0.1512	26	146	2.06e-06	1.94e-06	0.47504	X_3480882_SNP	G	SiteClass[FBgn0266429|AstA-R1|INTRON|0],TranscriptAnnot[INTRON(MODIFIER||||394|AstA-R1|protein_coding|CODING|FBtr0070575|1|1);INTRON(MODIFIER||||394|AstA-R1|protein_coding|CODING|FBtr0333798|1|1)]	-	FBgn0266429	The gene Allatostatin A receptor 1 is referred to in FlyBase by the symbol Dmel\AstA-R1 (CG2872, FBgn0266429). It is a protein_coding_gene from Drosophila melanogaster. It has 2 annotated transcripts and 2 polypeptides (1 unique). Gene sequence location is X:3574536..3666724. It has the cytological map location 3D6-3E2. Protein features are: G protein-coupled receptor, rhodopsin-like; GPCR, rhodo…
FBtr0070575	X_3480882_SNP	A	G	0.1512	26	146	2.06e-06	1.94e-06	0.47504	X_3480882_SNP	G	SiteClass[FBgn0266429|AstA-R1|INTRON|0],TranscriptAnnot[INTRON(MODIFIER||||394|AstA-R1|protein_coding|CODING|FBtr0070575|1|1);INTRON(MODIFIER||||394|AstA-R1|protein_coding|CODING|FBtr0333798|1|1)]	-
FBtr0333798	X_3480882_SNP	A	G	0.1512	26	146	2.06e-06	1.94e-06	0.47504	X_3480882_SNP	G	SiteClass[FBgn0266429|AstA-R1|INTRON|0],TranscriptAnnot[INTRON(MODIFIER||||394|AstA-R1|protein_coding|CODING|FBtr0070575|1|1);INTRON(MODIFIER||||394|AstA-R1|protein_coding|CODING|FBtr0333798|1|1)]	-
FBgn0263144	2R_2116391_SNP	T	C	0.06395	11	161	2.62e-06	2.01e-06	0.47504	2R_2116391_SNP	C	SiteClass[FBgn0263144|bin3|INTRON|0],TranscriptAnnot[UPSTREAM(MODIFIER||630||1367|bin3|protein_coding|CODING|FBtr0336519||1);INTRON(MODIFIER||||1367|bin3|protein_coding|CODING|FBtr0085992|1|1);INTRON(MODIFIER||||1367|bin3|protein_coding|CODING|FBtr0085993|1|1)]	(TF_binding_site|BDTNP1_TFBS_dl|FBsf0000300192)	FBgn0263144	The gene bicoid-interacting protein 3 is referred to in FlyBase by the symbol Dmel\bin3 (CG8276, FBgn0263144). It is a protein_coding_gene from Drosophila melanogaster. It has 4 annotated transcripts and 4 polypeptides (1 unique). Gene sequence location is 2R:6214568..6240602. It has the cytological map location 42A13. Protein features are: Bicoid-interacting 3; Bin3-type S-adenosyl-L-methionine …
FBtr0336519	2R_2116391_SNP	T	C	0.06395	11	161	2.62e-06	2.01e-06	0.47504	2R_2116391_SNP	C	SiteClass[FBgn0263144|bin3|INTRON|0],TranscriptAnnot[UPSTREAM(MODIFIER||630||1367|bin3|protein_coding|CODING|FBtr0336519||1);INTRON(MODIFIER||||1367|bin3|protein_coding|CODING|FBtr0085992|1|1);INTRON(MODIFIER||||1367|bin3|protein_coding|CODING|FBtr0085993|1|1)]	(TF_binding_site|BDTNP1_TFBS_dl|FBsf0000300192)
FBtr0085992	2R_2116391_SNP	T	C	0.06395	11	161	2.62e-06	2.01e-06	0.47504	2R_2116391_SNP	C	SiteClass[FBgn0263144|bin3|INTRON|0],TranscriptAnnot[UPSTREAM(MODIFIER||630||1367|bin3|protein_coding|CODING|FBtr0336519||1);INTRON(MODIFIER||||1367|bin3|protein_coding|CODING|FBtr0085992|1|1);INTRON(MODIFIER||||1367|bin3|protein_coding|CODING|FBtr0085993|1|1)]	(TF_binding_site|BDTNP1_TFBS_dl|FBsf0000300192)
FBtr0085993	2R_2116391_SNP	T	C	0.06395	11	161	2.62e-06	2.01e-06	0.47504	2R_2116391_SNP	C	SiteClass[FBgn0263144|bin3|INTRON|0],TranscriptAnnot[UPSTREAM(MODIFIER||630||1367|bin3|protein_coding|CODING|FBtr0336519||1);INTRON(MODIFIER||||1367|bin3|protein_coding|CODING|FBtr0085992|1|1);INTRON(MODIFIER||||1367|bin3|protein_coding|CODING|FBtr0085993|1|1)]	(TF_binding_site|BDTNP1_TFBS_dl|FBsf0000300192)
FBgn0043854	2L_6372607_SNP	C	G	0.2083	35	133	2.16e-06	2.64e-06	0.47504	2L_6372607_SNP	G	SiteClass[FBgn0043854|slam|INTRON|0],TranscriptAnnot[UPSTREAM(MODIFIER||908||1173|slam|protein_coding|CODING|FBtr0344864||1);INTRON(MODIFIER||||1173|slam|protein_coding|CODING|FBtr0290281|1|1)]	(TF_binding_site|BDTNP1_TFBS_bcd|FBsf0000333637);(TF_binding_site|BDTNP1_TFBS_dl|FBsf0000297023);(TF_binding_site|BDTNP1_TFBS_gt|FBsf0000293073);(TF_binding_site|BDTNP1_TFBS_hb|FBsf0000290622);(TF_binding_site|BDTNP1_TFBS_sna|FBsf0000268409);(TF_binding_site|BDTNP1_TFBS_twi|FBsf0000201018);(TF_binding_site|mE1_TFBS_cad|FBsf0000241513)	FBgn0043854	The gene slow as molasses is referred to in FlyBase by the symbol Dmel\slam (CG9506, FBgn0043854). It is a protein_coding_gene from Drosophila melanogaster. It has 2 annotated transcripts and 2 polypeptides (1 unique). Gene sequence location is 2L:6372388..6377284. It has the cytological map location 26C4. Its molecular function is unknown. It is involved in the biological process described with:…
FBtr0344864	2L_6372607_SNP	C	G	0.2083	35	133	2.16e-06	2.64e-06	0.47504	2L_6372607_SNP	G	SiteClass[FBgn0043854|slam|INTRON|0],TranscriptAnnot[UPSTREAM(MODIFIER||908||1173|slam|protein_coding|CODING|FBtr0344864||1);INTRON(MODIFIER||||1173|slam|protein_coding|CODING|FBtr0290281|1|1)]	(TF_binding_site|BDTNP1_TFBS_bcd|FBsf0000333637);(TF_binding_site|BDTNP1_TFBS_dl|FBsf0000297023);(TF_binding_site|BDTNP1_TFBS_gt|FBsf0000293073);(TF_binding_site|BDTNP1_TFBS_hb|FBsf0000290622);(TF_binding_site|BDTNP1_TFBS_sna|FBsf0000268409);(TF_binding_site|BDTNP1_TFBS_twi|FBsf0000201018);(TF_binding_site|mE1_TFBS_cad|FBsf0000241513)
FBtr0290281	2L_6372607_SNP	C	G	0.2083	35	133	2.16e-06	2.64e-06	0.47504	2L_6372607_SNP	G	SiteClass[FBgn0043854|slam|INTRON|0],TranscriptAnnot[UPSTREAM(MODIFIER||908||1173|slam|protein_coding|CODING|FBtr0344864||1);INTRON(MODIFIER||||1173|slam|protein_coding|CODING|FBtr0290281|1|1)]	(TF_binding_site|BDTNP1_TFBS_bcd|FBsf0000333637);(TF_binding_site|BDTNP1_TFBS_dl|FBsf0000297023);(TF_binding_site|BDTNP1_TFBS_gt|FBsf0000293073);(TF_binding_site|BDTNP1_TFBS_hb|FBsf0000290622);(TF_binding_site|BDTNP1_TFBS_sna|FBsf0000268409);(TF_binding_site|BDTNP1_TFBS_twi|FBsf0000201018);(TF_binding_site|mE1_TFBS_cad|FBsf0000241513)
FBgn0003502	2L_8268475_SNP	C	T	0.1394	23	142	3.89e-06	2.68e-06	0.47504	2L_8268475_SNP	T	SiteClass[FBgn0003502|Btk29A|INTRON|0],TranscriptAnnot[INTRON(MODIFIER||||603|Btk29A|protein_coding|CODING|FBtr0079615|2|1);INTRON(MODIFIER||||603|Btk29A|protein_coding|CODING|FBtr0079618|2|1);INTRON(MODIFIER||||603|Btk29A|protein_coding|CODING|FBtr0112835|1|1);INTRON(MODIFIER||||786|Btk29A|protein_coding|CODING|FBtr0079616|5|1);INTRON(MODIFIER||||786|Btk29A|protein_coding|CODING|FBtr0079617|5|1)…	(TF_binding_site|mE1_TFBS_HSA|FBsf0000346709);(TF_binding_site|mE1_TFBS_inv|FBsf0000234772)	FBgn0003502	The gene Btk family kinase at 29A is referred to in FlyBase by the symbol Dmel\Btk29A (CG8049, FBgn0003502). It is a protein_coding_gene from Drosophila melanogaster. It has 8 annotated transcripts and 8 polypeptides (4 unique). Gene sequence location is 2L:8258373..8301079. It has the cytological map location 29A1-29A3. Protein features are: PH domain-like; Pleckstrin homology domain; Protein ki…
FBtr0079615	2L_8268475_SNP	C	T	0.1394	23	142	3.89e-06	2.68e-06	0.47504	2L_8268475_SNP	T	SiteClass[FBgn0003502|Btk29A|INTRON|0],TranscriptAnnot[INTRON(MODIFIER||||603|Btk29A|protein_coding|CODING|FBtr0079615|2|1);INTRON(MODIFIER||||603|Btk29A|protein_coding|CODING|FBtr0079618|2|1);INTRON(MODIFIER||||603|Btk29A|protein_coding|CODING|FBtr0112835|1|1);INTRON(MODIFIER||||786|Btk29A|protein_coding|CODING|FBtr0079616|5|1);INTRON(MODIFIER||||786|Btk29A|protein_coding|CODING|FBtr0079617|5|1)…	(TF_binding_site|mE1_TFBS_HSA|FBsf0000346709);(TF_binding_site|mE1_TFBS_inv|FBsf0000234772)
FBtr0079618	2L_8268475_SNP	C	T	0.1394	23	142	3.89e-06	2.68e-06	0.47504	2L_8268475_SNP	T	SiteClass[FBgn0003502|Btk29A|INTRON|0],TranscriptAnnot[INTRON(MODIFIER||||603|Btk29A|protein_coding|CODING|FBtr0079615|2|1);INTRON(MODIFIER||||603|Btk29A|protein_coding|CODING|FBtr0079618|2|1);INTRON(MODIFIER||||603|Btk29A|protein_coding|CODING|FBtr0112835|1|1);INTRON(MODIFIER||||786|Btk29A|protein_coding|CODING|FBtr0079616|5|1);INTRON(MODIFIER||||786|Btk29A|protein_coding|CODING|FBtr0079617|5|1)…	(TF_binding_site|mE1_TFBS_HSA|FBsf0000346709);(TF_binding_site|mE1_TFBS_inv|FBsf0000234772)
FBtr0112835	2L_8268475_SNP	C	T	0.1394	23	142	3.89e-06	2.68e-06	0.47504	2L_8268475_SNP	T	SiteClass[FBgn0003502|Btk29A|INTRON|0],TranscriptAnnot[INTRON(MODIFIER||||603|Btk29A|protein_coding|CODING|FBtr0079615|2|1);INTRON(MODIFIER||||603|Btk29A|protein_coding|CODING|FBtr0079618|2|1);INTRON(MODIFIER||||603|Btk29A|protein_coding|CODING|FBtr0112835|1|1);INTRON(MODIFIER||||786|Btk29A|protein_coding|CODING|FBtr0079616|5|1);INTRON(MODIFIER||||786|Btk29A|protein_coding|CODING|FBtr0079617|5|1)…	(TF_binding_site|mE1_TFBS_HSA|FBsf0000346709);(TF_binding_site|mE1_TFBS_inv|FBsf0000234772)
FBtr0079616	2L_8268475_SNP	C	T	0.1394	23	142	3.89e-06	2.68e-06	0.47504	2L_8268475_SNP	T	SiteClass[FBgn0003502|Btk29A|INTRON|0],TranscriptAnnot[INTRON(MODIFIER||||603|Btk29A|protein_coding|CODING|FBtr0079615|2|1);INTRON(MODIFIER||||603|Btk29A|protein_coding|CODING|FBtr0079618|2|1);INTRON(MODIFIER||||603|Btk29A|protein_coding|CODING|FBtr0112835|1|1);INTRON(MODIFIER||||786|Btk29A|protein_coding|CODING|FBtr0079616|5|1);INTRON(MODIFIER||||786|Btk29A|protein_coding|CODING|FBtr0079617|5|1)…	(TF_binding_site|mE1_TFBS_HSA|FBsf0000346709);(TF_binding_site|mE1_TFBS_inv|FBsf0000234772)
FBtr0079617	2L_8268475_SNP	C	T	0.1394	23	142	3.89e-06	2.68e-06	0.47504	2L_8268475_SNP	T	SiteClass[FBgn0003502|Btk29A|INTRON|0],TranscriptAnnot[INTRON(MODIFIER||||603|Btk29A|protein_coding|CODING|FBtr0079615|2|1);INTRON(MODIFIER||||603|Btk29A|protein_coding|CODING|FBtr0079618|2|1);INTRON(MODIFIER||||603|Btk29A|protein_coding|CODING|FBtr0112835|1|1);INTRON(MODIFIER||||786|Btk29A|protein_coding|CODING|FBtr0079616|5|1);INTRON(MODIFIER||||786|Btk29A|protein_coding|CODING|FBtr0079617|5|1)…	(TF_binding_site|mE1_TFBS_HSA|FBsf0000346709);(TF_binding_site|mE1_TFBS_inv|FBsf0000234772)
FBtr0112836	2L_8268475_SNP	C	T	0.1394	23	142	3.89e-06	2.68e-06	0.47504	2L_8268475_SNP	T	SiteClass[FBgn0003502|Btk29A|INTRON|0],TranscriptAnnot[INTRON(MODIFIER||||603|Btk29A|protein_coding|CODING|FBtr0079615|2|1);INTRON(MODIFIER||||603|Btk29A|protein_coding|CODING|FBtr0079618|2|1);INTRON(MODIFIER||||603|Btk29A|protein_coding|CODING|FBtr0112835|1|1);INTRON(MODIFIER||||786|Btk29A|protein_coding|CODING|FBtr0079616|5|1);INTRON(MODIFIER||||786|Btk29A|protein_coding|CODING|FBtr0079617|5|1)…	(TF_binding_site|mE1_TFBS_HSA|FBsf0000346709);(TF_binding_site|mE1_TFBS_inv|FBsf0000234772)
FBtr0330693	2L_8268475_SNP	C	T	0.1394	23	142	3.89e-06	2.68e-06	0.47504	2L_8268475_SNP	T	SiteClass[FBgn0003502|Btk29A|INTRON|0],TranscriptAnnot[INTRON(MODIFIER||||603|Btk29A|protein_coding|CODING|FBtr0079615|2|1);INTRON(MODIFIER||||603|Btk29A|protein_coding|CODING|FBtr0079618|2|1);INTRON(MODIFIER||||603|Btk29A|protein_coding|CODING|FBtr0112835|1|1);INTRON(MODIFIER||||786|Btk29A|protein_coding|CODING|FBtr0079616|5|1);INTRON(MODIFIER||||786|Btk29A|protein_coding|CODING|FBtr0079617|5|1)…	(TF_binding_site|mE1_TFBS_HSA|FBsf0000346709);(TF_binding_site|mE1_TFBS_inv|FBsf0000234772)
FBgn0262103	2R_14581186_SNP	C	A	0.2941	50	120	5.12e-06	3.81e-06	0.536924	2R_14581186_SNP	A	SiteClass[FBgn0262103|Sik3|INTRON|0],TranscriptAnnot[INTRON(MODIFIER||||702|Sik3|protein_coding|CODING|FBtr0304024|2|1);INTRON(MODIFIER||||1471|Sik3|protein_coding|CODING|FBtr0304025|2|1);INTRON(MODIFIER||||1471|Sik3|protein_coding|CODING|FBtr0304026|2|1);INTRON(MODIFIER||||1468|Sik3|protein_coding|CODING|FBtr0340388|2|1);INTRON(MODIFIER||||1382|Sik3|protein_coding|CODING|FBtr0344258|2|1);INTRON(…	(TF_binding_site|BDTNP1_TFBS_da|FBsf0000324711);(TF_binding_site|BDTNP1_TFBS_twi|FBsf0000199781)	FBgn0262103	The gene Salt-inducible kinase 3 is referred to in FlyBase by the symbol Dmel\Sik3 (CG42856, FBgn0262103). It is a protein_coding_gene from Drosophila melanogaster. It has 6 annotated transcripts and 6 polypeptides (5 unique). Gene sequence location is 2R:18688132..18705805. It has the cytological map location 55E8-55E9. Protein features are: KA1 domain/Ssp2, C-terminal; Kinase associated domain …
FBtr0304024	2R_14581186_SNP	C	A	0.2941	50	120	5.12e-06	3.81e-06	0.536924	2R_14581186_SNP	A	SiteClass[FBgn0262103|Sik3|INTRON|0],TranscriptAnnot[INTRON(MODIFIER||||702|Sik3|protein_coding|CODING|FBtr0304024|2|1);INTRON(MODIFIER||||1471|Sik3|protein_coding|CODING|FBtr0304025|2|1);INTRON(MODIFIER||||1471|Sik3|protein_coding|CODING|FBtr0304026|2|1);INTRON(MODIFIER||||1468|Sik3|protein_coding|CODING|FBtr0340388|2|1);INTRON(MODIFIER||||1382|Sik3|protein_coding|CODING|FBtr0344258|2|1);INTRON(…	(TF_binding_site|BDTNP1_TFBS_da|FBsf0000324711);(TF_binding_site|BDTNP1_TFBS_twi|FBsf0000199781)
FBtr0304025	2R_14581186_SNP	C	A	0.2941	50	120	5.12e-06	3.81e-06	0.536924	2R_14581186_SNP	A	SiteClass[FBgn0262103|Sik3|INTRON|0],TranscriptAnnot[INTRON(MODIFIER||||702|Sik3|protein_coding|CODING|FBtr0304024|2|1);INTRON(MODIFIER||||1471|Sik3|protein_coding|CODING|FBtr0304025|2|1);INTRON(MODIFIER||||1471|Sik3|protein_coding|CODING|FBtr0304026|2|1);INTRON(MODIFIER||||1468|Sik3|protein_coding|CODING|FBtr0340388|2|1);INTRON(MODIFIER||||1382|Sik3|protein_coding|CODING|FBtr0344258|2|1);INTRON(…	(TF_binding_site|BDTNP1_TFBS_da|FBsf0000324711);(TF_binding_site|BDTNP1_TFBS_twi|FBsf0000199781)
FBtr0304026	2R_14581186_SNP	C	A	0.2941	50	120	5.12e-06	3.81e-06	0.536924	2R_14581186_SNP	A	SiteClass[FBgn0262103|Sik3|INTRON|0],TranscriptAnnot[INTRON(MODIFIER||||702|Sik3|protein_coding|CODING|FBtr0304024|2|1);INTRON(MODIFIER||||1471|Sik3|protein_coding|CODING|FBtr0304025|2|1);INTRON(MODIFIER||||1471|Sik3|protein_coding|CODING|FBtr0304026|2|1);INTRON(MODIFIER||||1468|Sik3|protein_coding|CODING|FBtr0340388|2|1);INTRON(MODIFIER||||1382|Sik3|protein_coding|CODING|FBtr0344258|2|1);INTRON(…	(TF_binding_site|BDTNP1_TFBS_da|FBsf0000324711);(TF_binding_site|BDTNP1_TFBS_twi|FBsf0000199781)
FBtr0340388	2R_14581186_SNP	C	A	0.2941	50	120	5.12e-06	3.81e-06	0.536924	2R_14581186_SNP	A	SiteClass[FBgn0262103|Sik3|INTRON|0],TranscriptAnnot[INTRON(MODIFIER||||702|Sik3|protein_coding|CODING|FBtr0304024|2|1);INTRON(MODIFIER||||1471|Sik3|protein_coding|CODING|FBtr0304025|2|1);INTRON(MODIFIER||||1471|Sik3|protein_coding|CODING|FBtr0304026|2|1);INTRON(MODIFIER||||1468|Sik3|protein_coding|CODING|FBtr0340388|2|1);INTRON(MODIFIER||||1382|Sik3|protein_coding|CODING|FBtr0344258|2|1);INTRON(…	(TF_binding_site|BDTNP1_TFBS_da|FBsf0000324711);(TF_binding_site|BDTNP1_TFBS_twi|FBsf0000199781)
FBtr0344258	2R_14581186_SNP	C	A	0.2941	50	120	5.12e-06	3.81e-06	0.536924	2R_14581186_SNP	A	SiteClass[FBgn0262103|Sik3|INTRON|0],TranscriptAnnot[INTRON(MODIFIER||||702|Sik3|protein_coding|CODING|FBtr0304024|2|1);INTRON(MODIFIER||||1471|Sik3|protein_coding|CODING|FBtr0304025|2|1);INTRON(MODIFIER||||1471|Sik3|protein_coding|CODING|FBtr0304026|2|1);INTRON(MODIFIER||||1468|Sik3|protein_coding|CODING|FBtr0340388|2|1);INTRON(MODIFIER||||1382|Sik3|protein_coding|CODING|FBtr0344258|2|1);INTRON(…	(TF_binding_site|BDTNP1_TFBS_da|FBsf0000324711);(TF_binding_site|BDTNP1_TFBS_twi|FBsf0000199781)
FBtr0344259	2R_14581186_SNP	C	A	0.2941	50	120	5.12e-06	3.81e-06	0.536924	2R_14581186_SNP	A	SiteClass[FBgn0262103|Sik3|INTRON|0],TranscriptAnnot[INTRON(MODIFIER||||702|Sik3|protein_coding|CODING|FBtr0304024|2|1);INTRON(MODIFIER||||1471|Sik3|protein_coding|CODING|FBtr0304025|2|1);INTRON(MODIFIER||||1471|Sik3|protein_coding|CODING|FBtr0304026|2|1);INTRON(MODIFIER||||1468|Sik3|protein_coding|CODING|FBtr0340388|2|1);INTRON(MODIFIER||||1382|Sik3|protein_coding|CODING|FBtr0344258|2|1);INTRON(…	(TF_binding_site|BDTNP1_TFBS_da|FBsf0000324711);(TF_binding_site|BDTNP1_TFBS_twi|FBsf0000199781)
FBgn0043854	2L_6372516_SNP	C	G	0.2083	35	133	3.69e-06	3.93e-06	0.536924	2L_6372516_SNP	G	SiteClass[FBgn0043854|slam|UPSTREAM|999],TranscriptAnnot[UTR_5_PRIME(MODIFIER||1061||1173|slam|protein_coding|CODING|FBtr0290281|1|1);UPSTREAM(MODIFIER||999||1173|slam|protein_coding|CODING|FBtr0344864||1)]	(TF_binding_site|BDTNP1_TFBS_bcd|FBsf0000333637);(TF_binding_site|BDTNP1_TFBS_dl|FBsf0000297023);(TF_binding_site|BDTNP1_TFBS_gt|FBsf0000293073);(TF_binding_site|BDTNP1_TFBS_twi|FBsf0000201018);(TF_binding_site|mE1_TFBS_cad|FBsf0000241513)	FBgn0043854	The gene slow as molasses is referred to in FlyBase by the symbol Dmel\slam (CG9506, FBgn0043854). It is a protein_coding_gene from Drosophila melanogaster. It has 2 annotated transcripts and 2 polypeptides (1 unique). Gene sequence location is 2L:6372388..6377284. It has the cytological map location 26C4. Its molecular function is unknown. It is involved in the biological process described with:…
FBtr0290281	2L_6372516_SNP	C	G	0.2083	35	133	3.69e-06	3.93e-06	0.536924	2L_6372516_SNP	G	SiteClass[FBgn0043854|slam|UPSTREAM|999],TranscriptAnnot[UTR_5_PRIME(MODIFIER||1061||1173|slam|protein_coding|CODING|FBtr0290281|1|1);UPSTREAM(MODIFIER||999||1173|slam|protein_coding|CODING|FBtr0344864||1)]	(TF_binding_site|BDTNP1_TFBS_bcd|FBsf0000333637);(TF_binding_site|BDTNP1_TFBS_dl|FBsf0000297023);(TF_binding_site|BDTNP1_TFBS_gt|FBsf0000293073);(TF_binding_site|BDTNP1_TFBS_twi|FBsf0000201018);(TF_binding_site|mE1_TFBS_cad|FBsf0000241513)
FBtr0344864	2L_6372516_SNP	C	G	0.2083	35	133	3.69e-06	3.93e-06	0.536924	2L_6372516_SNP	G	SiteClass[FBgn0043854|slam|UPSTREAM|999],TranscriptAnnot[UTR_5_PRIME(MODIFIER||1061||1173|slam|protein_coding|CODING|FBtr0290281|1|1);UPSTREAM(MODIFIER||999||1173|slam|protein_coding|CODING|FBtr0344864||1)]	(TF_binding_site|BDTNP1_TFBS_bcd|FBsf0000333637);(TF_binding_site|BDTNP1_TFBS_dl|FBsf0000297023);(TF_binding_site|BDTNP1_TFBS_gt|FBsf0000293073);(TF_binding_site|BDTNP1_TFBS_twi|FBsf0000201018);(TF_binding_site|mE1_TFBS_cad|FBsf0000241513)
FBgn0033638	2R_7508743_SNP	A	G	0.2012	34	135	1.21e-05	6.9e-06	0.71549	2R_7508743_SNP	G	SiteClass[FBgn0033638|CG9005|SYNONYMOUS_CODING|0],TranscriptAnnot[SYNONYMOUS_CODING(LOW|SILENT|agC/agT|S1192|1297|CG9005|protein_coding|CODING|FBtr0088089|7|1);SYNONYMOUS_CODING(LOW|SILENT|agC/agT|S1192|1297|CG9005|protein_coding|CODING|FBtr0300945|7|1);SYNONYMOUS_CODING(LOW|SILENT|agC/agT|S1192|1297|CG9005|protein_coding|CODING|FBtr0306029|7|1)]	(TF_binding_site|BDTNP1_TFBS_da|FBsf0000323885);(TF_binding_site|mE1_TFBS_chinmo|FBsf0000211108);(TF_binding_site|mE1_TFBS_HSA|FBsf0000355702)	FBgn0033638	This gene is referred to in FlyBase by the symbol Dmel\CG9005 (FBgn0033638). It is a protein_coding_gene from Drosophila melanogaster. It has 3 annotated transcripts and 3 polypeptides (1 unique). Gene sequence location is 2R:11619479..11640941. It has the cytological map location 48A3-48B2. Protein features are: Domain of unknown function DUF4210. Its molecular function is described by: . It is …
FBtr0088089	2R_7508743_SNP	A	G	0.2012	34	135	1.21e-05	6.9e-06	0.71549	2R_7508743_SNP	G	SiteClass[FBgn0033638|CG9005|SYNONYMOUS_CODING|0],TranscriptAnnot[SYNONYMOUS_CODING(LOW|SILENT|agC/agT|S1192|1297|CG9005|protein_coding|CODING|FBtr0088089|7|1);SYNONYMOUS_CODING(LOW|SILENT|agC/agT|S1192|1297|CG9005|protein_coding|CODING|FBtr0300945|7|1);SYNONYMOUS_CODING(LOW|SILENT|agC/agT|S1192|1297|CG9005|protein_coding|CODING|FBtr0306029|7|1)]	(TF_binding_site|BDTNP1_TFBS_da|FBsf0000323885);(TF_binding_site|mE1_TFBS_chinmo|FBsf0000211108);(TF_binding_site|mE1_TFBS_HSA|FBsf0000355702)
FBtr0300945	2R_7508743_SNP	A	G	0.2012	34	135	1.21e-05	6.9e-06	0.71549	2R_7508743_SNP	G	SiteClass[FBgn0033638|CG9005|SYNONYMOUS_CODING|0],TranscriptAnnot[SYNONYMOUS_CODING(LOW|SILENT|agC/agT|S1192|1297|CG9005|protein_coding|CODING|FBtr0088089|7|1);SYNONYMOUS_CODING(LOW|SILENT|agC/agT|S1192|1297|CG9005|protein_coding|CODING|FBtr0300945|7|1);SYNONYMOUS_CODING(LOW|SILENT|agC/agT|S1192|1297|CG9005|protein_coding|CODING|FBtr0306029|7|1)]	(TF_binding_site|BDTNP1_TFBS_da|FBsf0000323885);(TF_binding_site|mE1_TFBS_chinmo|FBsf0000211108);(TF_binding_site|mE1_TFBS_HSA|FBsf0000355702)
FBtr0306029	2R_7508743_SNP	A	G	0.2012	34	135	1.21e-05	6.9e-06	0.71549	2R_7508743_SNP	G	SiteClass[FBgn0033638|CG9005|SYNONYMOUS_CODING|0],TranscriptAnnot[SYNONYMOUS_CODING(LOW|SILENT|agC/agT|S1192|1297|CG9005|protein_coding|CODING|FBtr0088089|7|1);SYNONYMOUS_CODING(LOW|SILENT|agC/agT|S1192|1297|CG9005|protein_coding|CODING|FBtr0300945|7|1);SYNONYMOUS_CODING(LOW|SILENT|agC/agT|S1192|1297|CG9005|protein_coding|CODING|FBtr0306029|7|1)]	(TF_binding_site|BDTNP1_TFBS_da|FBsf0000323885);(TF_binding_site|mE1_TFBS_chinmo|FBsf0000211108);(TF_binding_site|mE1_TFBS_HSA|FBsf0000355702)
FBgn0003499	3R_13946539_SNP	T	G	0.1698	27	132	9.29e-06	7.1e-06	0.71549	3R_13946539_SNP	G	SiteClass[FBgn0003499|sr|INTRON|0],TranscriptAnnot[INTRON(MODIFIER||||1186|sr|protein_coding|CODING|FBtr0083542|3|1);INTRON(MODIFIER||||1271|sr|protein_coding|CODING|FBtr0330050|3|1)]	(TF_binding_site|BDTNP1_TFBS_dl|FBsf0000312552)	FBgn0003499	The gene stripe is referred to in FlyBase by the symbol Dmel\sr (CG7847, FBgn0003499). It is a protein_coding_gene from Drosophila melanogaster. It has 5 annotated transcripts and 5 polypeptides (4 unique). Gene sequence location is 3R:18090803..18135583. It has the cytological map location 90E4-90F1. Protein features are: Zinc finger C2H2-type/integrase DNA-binding domain; Zinc finger, C2H2; Zin…
FBtr0083542	3R_13946539_SNP	T	G	0.1698	27	132	9.29e-06	7.1e-06	0.71549	3R_13946539_SNP	G	SiteClass[FBgn0003499|sr|INTRON|0],TranscriptAnnot[INTRON(MODIFIER||||1186|sr|protein_coding|CODING|FBtr0083542|3|1);INTRON(MODIFIER||||1271|sr|protein_coding|CODING|FBtr0330050|3|1)]	(TF_binding_site|BDTNP1_TFBS_dl|FBsf0000312552)
FBtr0330050	3R_13946539_SNP	T	G	0.1698	27	132	9.29e-06	7.1e-06	0.71549	3R_13946539_SNP	G	SiteClass[FBgn0003499|sr|INTRON|0],TranscriptAnnot[INTRON(MODIFIER||||1186|sr|protein_coding|CODING|FBtr0083542|3|1);INTRON(MODIFIER||||1271|sr|protein_coding|CODING|FBtr0330050|3|1)]	(TF_binding_site|BDTNP1_TFBS_dl|FBsf0000312552)
FBgn0267001	X_12195798_SNP	T	G	0.1161	18	137	6.32e-06	7.76e-06	0.742487	X_12195798_SNP	G	SiteClass[FBgn0267001|Ten-a|INTRON|0],TranscriptAnnot[INTRON(MODIFIER||||3004|Ten-a|protein_coding|CODING|FBtr0299858|9|1);INTRON(MODIFIER||||3378|Ten-a|protein_coding|CODING|FBtr0299859|13|1);INTRON(MODIFIER||||3004|Ten-a|protein_coding|CODING|FBtr0299860|14|1);INTRON(MODIFIER||||2902|Ten-a|protein_coding|CODING|FBtr0300201|8|1);INTRON(MODIFIER||||3004|Ten-a|protein_coding|CODING|FBtr0300203|15|…	-	FBgn0267001	The gene Tenascin accessory is referred to in FlyBase by the symbol Dmel\Ten-a (CG42338, FBgn0267001). It is a protein_coding_gene from Drosophila melanogaster. It has 11 annotated transcripts and 11 polypeptides (5 unique). Gene sequence location is X:12043698..12335214. It has the cytological map location 11A6. Protein features are: EGF-like domain; EGF-like domain, extracellular; EGF-like, con…
FBtr0299858	X_12195798_SNP	T	G	0.1161	18	137	6.32e-06	7.76e-06	0.742487	X_12195798_SNP	G	SiteClass[FBgn0267001|Ten-a|INTRON|0],TranscriptAnnot[INTRON(MODIFIER||||3004|Ten-a|protein_coding|CODING|FBtr0299858|9|1);INTRON(MODIFIER||||3378|Ten-a|protein_coding|CODING|FBtr0299859|13|1);INTRON(MODIFIER||||3004|Ten-a|protein_coding|CODING|FBtr0299860|14|1);INTRON(MODIFIER||||2902|Ten-a|protein_coding|CODING|FBtr0300201|8|1);INTRON(MODIFIER||||3004|Ten-a|protein_coding|CODING|FBtr0300203|15|…	-
FBtr0299859	X_12195798_SNP	T	G	0.1161	18	137	6.32e-06	7.76e-06	0.742487	X_12195798_SNP	G	SiteClass[FBgn0267001|Ten-a|INTRON|0],TranscriptAnnot[INTRON(MODIFIER||||3004|Ten-a|protein_coding|CODING|FBtr0299858|9|1);INTRON(MODIFIER||||3378|Ten-a|protein_coding|CODING|FBtr0299859|13|1);INTRON(MODIFIER||||3004|Ten-a|protein_coding|CODING|FBtr0299860|14|1);INTRON(MODIFIER||||2902|Ten-a|protein_coding|CODING|FBtr0300201|8|1);INTRON(MODIFIER||||3004|Ten-a|protein_coding|CODING|FBtr0300203|15|…	-
FBtr0299860	X_12195798_SNP	T	G	0.1161	18	137	6.32e-06	7.76e-06	0.742487	X_12195798_SNP	G	SiteClass[FBgn0267001|Ten-a|INTRON|0],TranscriptAnnot[INTRON(MODIFIER||||3004|Ten-a|protein_coding|CODING|FBtr0299858|9|1);INTRON(MODIFIER||||3378|Ten-a|protein_coding|CODING|FBtr0299859|13|1);INTRON(MODIFIER||||3004|Ten-a|protein_coding|CODING|FBtr0299860|14|1);INTRON(MODIFIER||||2902|Ten-a|protein_coding|CODING|FBtr0300201|8|1);INTRON(MODIFIER||||3004|Ten-a|protein_coding|CODING|FBtr0300203|15|…	-
FBtr0300201	X_12195798_SNP	T	G	0.1161	18	137	6.32e-06	7.76e-06	0.742487	X_12195798_SNP	G	SiteClass[FBgn0267001|Ten-a|INTRON|0],TranscriptAnnot[INTRON(MODIFIER||||3004|Ten-a|protein_coding|CODING|FBtr0299858|9|1);INTRON(MODIFIER||||3378|Ten-a|protein_coding|CODING|FBtr0299859|13|1);INTRON(MODIFIER||||3004|Ten-a|protein_coding|CODING|FBtr0299860|14|1);INTRON(MODIFIER||||2902|Ten-a|protein_coding|CODING|FBtr0300201|8|1);INTRON(MODIFIER||||3004|Ten-a|protein_coding|CODING|FBtr0300203|15|…	-
FBtr0300203	X_12195798_SNP	T	G	0.1161	18	137	6.32e-06	7.76e-06	0.742487	X_12195798_SNP	G	SiteClass[FBgn0267001|Ten-a|INTRON|0],TranscriptAnnot[INTRON(MODIFIER||||3004|Ten-a|protein_coding|CODING|FBtr0299858|9|1);INTRON(MODIFIER||||3378|Ten-a|protein_coding|CODING|FBtr0299859|13|1);INTRON(MODIFIER||||3004|Ten-a|protein_coding|CODING|FBtr0299860|14|1);INTRON(MODIFIER||||2902|Ten-a|protein_coding|CODING|FBtr0300201|8|1);INTRON(MODIFIER||||3004|Ten-a|protein_coding|CODING|FBtr0300203|15|…	-
FBtr0308221	X_12195798_SNP	T	G	0.1161	18	137	6.32e-06	7.76e-06	0.742487	X_12195798_SNP	G	SiteClass[FBgn0267001|Ten-a|INTRON|0],TranscriptAnnot[INTRON(MODIFIER||||3004|Ten-a|protein_coding|CODING|FBtr0299858|9|1);INTRON(MODIFIER||||3378|Ten-a|protein_coding|CODING|FBtr0299859|13|1);INTRON(MODIFIER||||3004|Ten-a|protein_coding|CODING|FBtr0299860|14|1);INTRON(MODIFIER||||2902|Ten-a|protein_coding|CODING|FBtr0300201|8|1);INTRON(MODIFIER||||3004|Ten-a|protein_coding|CODING|FBtr0300203|15|…	-
FBtr0310078	X_12195798_SNP	T	G	0.1161	18	137	6.32e-06	7.76e-06	0.742487	X_12195798_SNP	G	SiteClass[FBgn0267001|Ten-a|INTRON|0],TranscriptAnnot[INTRON(MODIFIER||||3004|Ten-a|protein_coding|CODING|FBtr0299858|9|1);INTRON(MODIFIER||||3378|Ten-a|protein_coding|CODING|FBtr0299859|13|1);INTRON(MODIFIER||||3004|Ten-a|protein_coding|CODING|FBtr0299860|14|1);INTRON(MODIFIER||||2902|Ten-a|protein_coding|CODING|FBtr0300201|8|1);INTRON(MODIFIER||||3004|Ten-a|protein_coding|CODING|FBtr0300203|15|…	-
FBtr0346335	X_12195798_SNP	T	G	0.1161	18	137	6.32e-06	7.76e-06	0.742487	X_12195798_SNP	G	SiteClass[FBgn0267001|Ten-a|INTRON|0],TranscriptAnnot[INTRON(MODIFIER||||3004|Ten-a|protein_coding|CODING|FBtr0299858|9|1);INTRON(MODIFIER||||3378|Ten-a|protein_coding|CODING|FBtr0299859|13|1);INTRON(MODIFIER||||3004|Ten-a|protein_coding|CODING|FBtr0299860|14|1);INTRON(MODIFIER||||2902|Ten-a|protein_coding|CODING|FBtr0300201|8|1);INTRON(MODIFIER||||3004|Ten-a|protein_coding|CODING|FBtr0300203|15|…	-
FBtr0308222	X_12195798_SNP	T	G	0.1161	18	137	6.32e-06	7.76e-06	0.742487	X_12195798_SNP	G	SiteClass[FBgn0267001|Ten-a|INTRON|0],TranscriptAnnot[INTRON(MODIFIER||||3004|Ten-a|protein_coding|CODING|FBtr0299858|9|1);INTRON(MODIFIER||||3378|Ten-a|protein_coding|CODING|FBtr0299859|13|1);INTRON(MODIFIER||||3004|Ten-a|protein_coding|CODING|FBtr0299860|14|1);INTRON(MODIFIER||||2902|Ten-a|protein_coding|CODING|FBtr0300201|8|1);INTRON(MODIFIER||||3004|Ten-a|protein_coding|CODING|FBtr0300203|15|…	-
FBtr0308223	X_12195798_SNP	T	G	0.1161	18	137	6.32e-06	7.76e-06	0.742487	X_12195798_SNP	G	SiteClass[FBgn0267001|Ten-a|INTRON|0],TranscriptAnnot[INTRON(MODIFIER||||3004|Ten-a|protein_coding|CODING|FBtr0299858|9|1);INTRON(MODIFIER||||3378|Ten-a|protein_coding|CODING|FBtr0299859|13|1);INTRON(MODIFIER||||3004|Ten-a|protein_coding|CODING|FBtr0299860|14|1);INTRON(MODIFIER||||2902|Ten-a|protein_coding|CODING|FBtr0300201|8|1);INTRON(MODIFIER||||3004|Ten-a|protein_coding|CODING|FBtr0300203|15|…	-
FBtr0346129	X_12195798_SNP	T	G	0.1161	18	137	6.32e-06	7.76e-06	0.742487	X_12195798_SNP	G	SiteClass[FBgn0267001|Ten-a|INTRON|0],TranscriptAnnot[INTRON(MODIFIER||||3004|Ten-a|protein_coding|CODING|FBtr0299858|9|1);INTRON(MODIFIER||||3378|Ten-a|protein_coding|CODING|FBtr0299859|13|1);INTRON(MODIFIER||||3004|Ten-a|protein_coding|CODING|FBtr0299860|14|1);INTRON(MODIFIER||||2902|Ten-a|protein_coding|CODING|FBtr0300201|8|1);INTRON(MODIFIER||||3004|Ten-a|protein_coding|CODING|FBtr0300203|15|…	-
FBgn0031869	2L_6942895_SNP	C	G	0.2619	44	124	8.76e-06	9.2e-06	0.755472	2L_6942895_SNP	G	SiteClass[FBgn0031869|CG18304|UPSTREAM|81;FBgn0031871|CG10158|DOWNSTREAM|283],TranscriptAnnot[UPSTREAM(MODIFIER||81||1895|CG18304|protein_coding|CODING|FBtr0079367||1);UPSTREAM(MODIFIER||81||1819|CG18304|protein_coding|CODING|FBtr0306285||1);UPSTREAM(MODIFIER||81||1813|CG18304|protein_coding|CODING|FBtr0332326||1);UPSTREAM(MODIFIER||81||1901|CG18304|protein_coding|CODING|FBtr0332327||1);DOWNSTREA…	-	FBgn0031869	This	gene	is	referred	to	in	FlyBase	by	the	symbol	Dmel\CG18304	(FBgn0031869).	It	is	a	protein_coding_gene	from	Drosophila	melanogaster.	It	has	4	annotated	transcripts	and	4	polypeptides	(all	unique).	Gene	sequence	location	is	2L:6932545..6942814.	It
FBgn0031871	2L_6942895_SNP	C	G	0.2619	44	124	8.76e-06	9.2e-06	0.755472	2L_6942895_SNP	G	SiteClass[FBgn0031869|CG18304|UPSTREAM|81;FBgn0031871|CG10158|DOWNSTREAM|283],TranscriptAnnot[UPSTREAM(MODIFIER||81||1895|CG18304|protein_coding|CODING|FBtr0079367||1);UPSTREAM(MODIFIER||81||1819|CG18304|protein_coding|CODING|FBtr0306285||1);UPSTREAM(MODIFIER||81||1813|CG18304|protein_coding|CODING|FBtr0332326||1);UPSTREAM(MODIFIER||81||1901|CG18304|protein_coding|CODING|FBtr0332327||1);DOWNSTREA…	-	FBgn0031871	The gene Fibroblast growth factor receptor 1 oncogene partner 2 is referred to in FlyBase by the symbol Dmel\Fgop2 (CG10158, FBgn0031871). It is a protein_coding_gene from Drosophila melanogaster. It has 2 annotated transcripts and 2 polypeptides (1 unique). Gene sequence location is 2L:6943178..6945289. It has the cytological map location 27C6. Protein features are: Suppressor of IKBKE 1. Its mo…
FBtr0079367	2L_6942895_SNP	C	G	0.2619	44	124	8.76e-06	9.2e-06	0.755472	2L_6942895_SNP	G	SiteClass[FBgn0031869|CG18304|UPSTREAM|81;FBgn0031871|CG10158|DOWNSTREAM|283],TranscriptAnnot[UPSTREAM(MODIFIER||81||1895|CG18304|protein_coding|CODING|FBtr0079367||1);UPSTREAM(MODIFIER||81||1819|CG18304|protein_coding|CODING|FBtr0306285||1);UPSTREAM(MODIFIER||81||1813|CG18304|protein_coding|CODING|FBtr0332326||1);UPSTREAM(MODIFIER||81||1901|CG18304|protein_coding|CODING|FBtr0332327||1);DOWNSTREA…	-
FBtr0306285	2L_6942895_SNP	C	G	0.2619	44	124	8.76e-06	9.2e-06	0.755472	2L_6942895_SNP	G	SiteClass[FBgn0031869|CG18304|UPSTREAM|81;FBgn0031871|CG10158|DOWNSTREAM|283],TranscriptAnnot[UPSTREAM(MODIFIER||81||1895|CG18304|protein_coding|CODING|FBtr0079367||1);UPSTREAM(MODIFIER||81||1819|CG18304|protein_coding|CODING|FBtr0306285||1);UPSTREAM(MODIFIER||81||1813|CG18304|protein_coding|CODING|FBtr0332326||1);UPSTREAM(MODIFIER||81||1901|CG18304|protein_coding|CODING|FBtr0332327||1);DOWNSTREA…	-
FBtr0332326	2L_6942895_SNP	C	G	0.2619	44	124	8.76e-06	9.2e-06	0.755472	2L_6942895_SNP	G	SiteClass[FBgn0031869|CG18304|UPSTREAM|81;FBgn0031871|CG10158|DOWNSTREAM|283],TranscriptAnnot[UPSTREAM(MODIFIER||81||1895|CG18304|protein_coding|CODING|FBtr0079367||1);UPSTREAM(MODIFIER||81||1819|CG18304|protein_coding|CODING|FBtr0306285||1);UPSTREAM(MODIFIER||81||1813|CG18304|protein_coding|CODING|FBtr0332326||1);UPSTREAM(MODIFIER||81||1901|CG18304|protein_coding|CODING|FBtr0332327||1);DOWNSTREA…	-
FBtr0332327	2L_6942895_SNP	C	G	0.2619	44	124	8.76e-06	9.2e-06	0.755472	2L_6942895_SNP	G	SiteClass[FBgn0031869|CG18304|UPSTREAM|81;FBgn0031871|CG10158|DOWNSTREAM|283],TranscriptAnnot[UPSTREAM(MODIFIER||81||1895|CG18304|protein_coding|CODING|FBtr0079367||1);UPSTREAM(MODIFIER||81||1819|CG18304|protein_coding|CODING|FBtr0306285||1);UPSTREAM(MODIFIER||81||1813|CG18304|protein_coding|CODING|FBtr0332326||1);UPSTREAM(MODIFIER||81||1901|CG18304|protein_coding|CODING|FBtr0332327||1);DOWNSTREA…	-
FBtr0332325	2L_6942895_SNP	C	G	0.2619	44	124	8.76e-06	9.2e-06	0.755472	2L_6942895_SNP	G	SiteClass[FBgn0031869|CG18304|UPSTREAM|81;FBgn0031871|CG10158|DOWNSTREAM|283],TranscriptAnnot[UPSTREAM(MODIFIER||81||1895|CG18304|protein_coding|CODING|FBtr0079367||1);UPSTREAM(MODIFIER||81||1819|CG18304|protein_coding|CODING|FBtr0306285||1);UPSTREAM(MODIFIER||81||1813|CG18304|protein_coding|CODING|FBtr0332326||1);UPSTREAM(MODIFIER||81||1901|CG18304|protein_coding|CODING|FBtr0332327||1);DOWNSTREA…	-
FBtr0079366	2L_6942895_SNP	C	G	0.2619	44	124	8.76e-06	9.2e-06	0.755472	2L_6942895_SNP	G	SiteClass[FBgn0031869|CG18304|UPSTREAM|81;FBgn0031871|CG10158|DOWNSTREAM|283],TranscriptAnnot[UPSTREAM(MODIFIER||81||1895|CG18304|protein_coding|CODING|FBtr0079367||1);UPSTREAM(MODIFIER||81||1819|CG18304|protein_coding|CODING|FBtr0306285||1);UPSTREAM(MODIFIER||81||1813|CG18304|protein_coding|CODING|FBtr0332326||1);UPSTREAM(MODIFIER||81||1901|CG18304|protein_coding|CODING|FBtr0332327||1);DOWNSTREA…	-
FBgn0087007	3L_14509307_SNP	T	G	0.0618	11	167	9.76e-06	9.31e-06	0.755472	3L_14509307_SNP	G	SiteClass[FBgn0087007|bbg|INTRON|0],TranscriptAnnot[INTRON(MODIFIER||||2637|bbg|protein_coding|CODING|FBtr0273422|2|1);INTRON(MODIFIER||||2637|bbg|protein_coding|CODING|FBtr0308596|2|1)]	-	FBgn0087007	The gene big bang is referred to in FlyBase by the symbol Dmel\bbg (CG42230, FBgn0087007). It is a protein_coding_gene from Drosophila melanogaster. It has 8 annotated transcripts and 8 polypeptides (5 unique). Gene sequence location is 3L:14412828..14536276. It has the cytological map location 70D7-70E1. Protein features are: PDZ domain. Its molecular function is unknown. It is involved in the b…
FBtr0273422	3L_14509307_SNP	T	G	0.0618	11	167	9.76e-06	9.31e-06	0.755472	3L_14509307_SNP	G	SiteClass[FBgn0087007|bbg|INTRON|0],TranscriptAnnot[INTRON(MODIFIER||||2637|bbg|protein_coding|CODING|FBtr0273422|2|1);INTRON(MODIFIER||||2637|bbg|protein_coding|CODING|FBtr0308596|2|1)]	-
FBtr0308596	3L_14509307_SNP	T	G	0.0618	11	167	9.76e-06	9.31e-06	0.755472	3L_14509307_SNP	G	SiteClass[FBgn0087007|bbg|INTRON|0],TranscriptAnnot[INTRON(MODIFIER||||2637|bbg|protein_coding|CODING|FBtr0273422|2|1);INTRON(MODIFIER||||2637|bbg|protein_coding|CODING|FBtr0308596|2|1)]	-
FBgn0264753	2R_15235766_SNP	G	T	0.06145	11	168	1.06e-05	9.66e-06	0.755472	2R_15235766_SNP	T	SiteClass[FBgn0264753|Rgk1|INTRON|0],TranscriptAnnot[INTRON(MODIFIER||||1379|Rgk1|protein_coding|CODING|FBtr0334283|2|1)]	-	FBgn0264753	The gene Rad, Gem/Kir family member 1 is referred to in FlyBase by the symbol Dmel\Rgk1 (CG44011, FBgn0264753). It is a protein_coding_gene from Drosophila melanogaster. It has 3 annotated transcripts and 3 polypeptides (all unique). Gene sequence location is 2R:19311148..19356525. It has the cytological map location 56C11-56D1. Protein features are: P-loop containing nucleoside triphosphate hydr…
FBtr0334283	2R_15235766_SNP	G	T	0.06145	11	168	1.06e-05	9.66e-06	0.755472	2R_15235766_SNP	T	SiteClass[FBgn0264753|Rgk1|INTRON|0],TranscriptAnnot[INTRON(MODIFIER||||1379|Rgk1|protein_coding|CODING|FBtr0334283|2|1)]	-
FBgn0030240	X_10742702_SNP	T	A	0.1264	22	152	1.55e-05	9.67e-06	0.755472	X_10742702_SNP	A	SiteClass[FBgn0030240|CG2202|UPSTREAM|88;FBgn0030239|CG17333|DOWNSTREAM|135],TranscriptAnnot[UPSTREAM(MODIFIER||88||889|CG2202|protein_coding|CODING|FBtr0073380||1);DOWNSTREAM(MODIFIER||135||243|CG17333|protein_coding|CODING|FBtr0073379||1);INTERGENIC(MODIFIER||||||||||1)]	(TF_binding_site|BDTNP1_TFBS_dl|FBsf0000318250);(TF_binding_site|BDTNP1_TFBS_Med|FBsf0000288387);(TF_binding_site|BDTNP1_TFBS_twi|FBsf0000205669);(TF_binding_site|mE1_TFBS_cad|FBsf0000243206);(TF_binding_site|mE1_TFBS_HSA|FBsf0000381330)	FBgn0030240	This gene is referred to in FlyBase by the symbol Dmel\CG2202 (FBgn0030240). It is a protein_coding_gene from Drosophila melanogaster. It has one annotated transcript and one polypeptide. Gene sequence location is X:10848757..10852327. It has the cytological map location 9F5. Protein features are: Zinc finger C2H2-type/integrase DNA-binding domain; Zinc finger, AD-type; Zinc finger, C2H2; Zinc fi…
FBgn0030239	X_10742702_SNP	T	A	0.1264	22	152	1.55e-05	9.67e-06	0.755472	X_10742702_SNP	A	SiteClass[FBgn0030240|CG2202|UPSTREAM|88;FBgn0030239|CG17333|DOWNSTREAM|135],TranscriptAnnot[UPSTREAM(MODIFIER||88||889|CG2202|protein_coding|CODING|FBtr0073380||1);DOWNSTREAM(MODIFIER||135||243|CG17333|protein_coding|CODING|FBtr0073379||1);INTERGENIC(MODIFIER||||||||||1)]	(TF_binding_site|BDTNP1_TFBS_dl|FBsf0000318250);(TF_binding_site|BDTNP1_TFBS_Med|FBsf0000288387);(TF_binding_site|BDTNP1_TFBS_twi|FBsf0000205669);(TF_binding_site|mE1_TFBS_cad|FBsf0000243206);(TF_binding_site|mE1_TFBS_HSA|FBsf0000381330)	FBgn0030239	This gene is referred to in FlyBase by the symbol Dmel\CG17333 (FBgn0030239). It is a protein_coding_gene from Drosophila melanogaster. It has one annotated transcript and one polypeptide. Gene sequence location is X:10847438..10848534. It has the cytological map location 9F5. Protein features are: 6-phosphogluconolactonase, DevB-type; Glucosamine/galactosamine-6-phosphate isomerase. Its molecula…
FBtr0073380	X_10742702_SNP	T	A	0.1264	22	152	1.55e-05	9.67e-06	0.755472	X_10742702_SNP	A	SiteClass[FBgn0030240|CG2202|UPSTREAM|88;FBgn0030239|CG17333|DOWNSTREAM|135],TranscriptAnnot[UPSTREAM(MODIFIER||88||889|CG2202|protein_coding|CODING|FBtr0073380||1);DOWNSTREAM(MODIFIER||135||243|CG17333|protein_coding|CODING|FBtr0073379||1);INTERGENIC(MODIFIER||||||||||1)]	(TF_binding_site|BDTNP1_TFBS_dl|FBsf0000318250);(TF_binding_site|BDTNP1_TFBS_Med|FBsf0000288387);(TF_binding_site|BDTNP1_TFBS_twi|FBsf0000205669);(TF_binding_site|mE1_TFBS_cad|FBsf0000243206);(TF_binding_site|mE1_TFBS_HSA|FBsf0000381330)
FBtr0073379	X_10742702_SNP	T	A	0.1264	22	152	1.55e-05	9.67e-06	0.755472	X_10742702_SNP	A	SiteClass[FBgn0030240|CG2202|UPSTREAM|88;FBgn0030239|CG17333|DOWNSTREAM|135],TranscriptAnnot[UPSTREAM(MODIFIER||88||889|CG2202|protein_coding|CODING|FBtr0073380||1);DOWNSTREAM(MODIFIER||135||243|CG17333|protein_coding|CODING|FBtr0073379||1);INTERGENIC(MODIFIER||||||||||1)]	(TF_binding_site|BDTNP1_TFBS_dl|FBsf0000318250);(TF_binding_site|BDTNP1_TFBS_Med|FBsf0000288387);(TF_binding_site|BDTNP1_TFBS_twi|FBsf0000205669);(TF_binding_site|mE1_TFBS_cad|FBsf0000243206);(TF_binding_site|mE1_TFBS_HSA|FBsf0000381330)
FBgn0031869	2L_6942917_SNP	A	G	0.1607	27	141	1.31e-05	1.02e-05	0.755472	2L_6942917_SNP	G	SiteClass[FBgn0031869|CG18304|UPSTREAM|103;FBgn0031871|CG10158|DOWNSTREAM|261],TranscriptAnnot[UPSTREAM(MODIFIER||103||1895|CG18304|protein_coding|CODING|FBtr0079367||1);UPSTREAM(MODIFIER||103||1819|CG18304|protein_coding|CODING|FBtr0306285||1);UPSTREAM(MODIFIER||103||1813|CG18304|protein_coding|CODING|FBtr0332326||1);UPSTREAM(MODIFIER||103||1901|CG18304|protein_coding|CODING|FBtr0332327||1);DOWN…	-	FBgn0031869	This	gene	is	referred	to	in	FlyBase	by	the	symbol	Dmel\CG18304	(FBgn0031869).	It	is	a	protein_coding_gene	from	Drosophila	melanogaster.	It	has	4	annotated	transcripts	and	4	polypeptides	(all	unique).	Gene	sequence	location	is	2L:6932545..6942814.	It
FBgn0031871	2L_6942917_SNP	A	G	0.1607	27	141	1.31e-05	1.02e-05	0.755472	2L_6942917_SNP	G	SiteClass[FBgn0031869|CG18304|UPSTREAM|103;FBgn0031871|CG10158|DOWNSTREAM|261],TranscriptAnnot[UPSTREAM(MODIFIER||103||1895|CG18304|protein_coding|CODING|FBtr0079367||1);UPSTREAM(MODIFIER||103||1819|CG18304|protein_coding|CODING|FBtr0306285||1);UPSTREAM(MODIFIER||103||1813|CG18304|protein_coding|CODING|FBtr0332326||1);UPSTREAM(MODIFIER||103||1901|CG18304|protein_coding|CODING|FBtr0332327||1);DOWN…	-	FBgn0031871	The gene Fibroblast growth factor receptor 1 oncogene partner 2 is referred to in FlyBase by the symbol Dmel\Fgop2 (CG10158, FBgn0031871). It is a protein_coding_gene from Drosophila melanogaster. It has 2 annotated transcripts and 2 polypeptides (1 unique). Gene sequence location is 2L:6943178..6945289. It has the cytological map location 27C6. Protein features are: Suppressor of IKBKE 1. Its mo…
FBtr0079367	2L_6942917_SNP	A	G	0.1607	27	141	1.31e-05	1.02e-05	0.755472	2L_6942917_SNP	G	SiteClass[FBgn0031869|CG18304|UPSTREAM|103;FBgn0031871|CG10158|DOWNSTREAM|261],TranscriptAnnot[UPSTREAM(MODIFIER||103||1895|CG18304|protein_coding|CODING|FBtr0079367||1);UPSTREAM(MODIFIER||103||1819|CG18304|protein_coding|CODING|FBtr0306285||1);UPSTREAM(MODIFIER||103||1813|CG18304|protein_coding|CODING|FBtr0332326||1);UPSTREAM(MODIFIER||103||1901|CG18304|protein_coding|CODING|FBtr0332327||1);DOWN…	-
FBtr0306285	2L_6942917_SNP	A	G	0.1607	27	141	1.31e-05	1.02e-05	0.755472	2L_6942917_SNP	G	SiteClass[FBgn0031869|CG18304|UPSTREAM|103;FBgn0031871|CG10158|DOWNSTREAM|261],TranscriptAnnot[UPSTREAM(MODIFIER||103||1895|CG18304|protein_coding|CODING|FBtr0079367||1);UPSTREAM(MODIFIER||103||1819|CG18304|protein_coding|CODING|FBtr0306285||1);UPSTREAM(MODIFIER||103||1813|CG18304|protein_coding|CODING|FBtr0332326||1);UPSTREAM(MODIFIER||103||1901|CG18304|protein_coding|CODING|FBtr0332327||1);DOWN…	-
FBtr0332326	2L_6942917_SNP	A	G	0.1607	27	141	1.31e-05	1.02e-05	0.755472	2L_6942917_SNP	G	SiteClass[FBgn0031869|CG18304|UPSTREAM|103;FBgn0031871|CG10158|DOWNSTREAM|261],TranscriptAnnot[UPSTREAM(MODIFIER||103||1895|CG18304|protein_coding|CODING|FBtr0079367||1);UPSTREAM(MODIFIER||103||1819|CG18304|protein_coding|CODING|FBtr0306285||1);UPSTREAM(MODIFIER||103||1813|CG18304|protein_coding|CODING|FBtr0332326||1);UPSTREAM(MODIFIER||103||1901|CG18304|protein_coding|CODING|FBtr0332327||1);DOWN…	-
FBtr0332327	2L_6942917_SNP	A	G	0.1607	27	141	1.31e-05	1.02e-05	0.755472	2L_6942917_SNP	G	SiteClass[FBgn0031869|CG18304|UPSTREAM|103;FBgn0031871|CG10158|DOWNSTREAM|261],TranscriptAnnot[UPSTREAM(MODIFIER||103||1895|CG18304|protein_coding|CODING|FBtr0079367||1);UPSTREAM(MODIFIER||103||1819|CG18304|protein_coding|CODING|FBtr0306285||1);UPSTREAM(MODIFIER||103||1813|CG18304|protein_coding|CODING|FBtr0332326||1);UPSTREAM(MODIFIER||103||1901|CG18304|protein_coding|CODING|FBtr0332327||1);DOWN…	-
FBtr0332325	2L_6942917_SNP	A	G	0.1607	27	141	1.31e-05	1.02e-05	0.755472	2L_6942917_SNP	G	SiteClass[FBgn0031869|CG18304|UPSTREAM|103;FBgn0031871|CG10158|DOWNSTREAM|261],TranscriptAnnot[UPSTREAM(MODIFIER||103||1895|CG18304|protein_coding|CODING|FBtr0079367||1);UPSTREAM(MODIFIER||103||1819|CG18304|protein_coding|CODING|FBtr0306285||1);UPSTREAM(MODIFIER||103||1813|CG18304|protein_coding|CODING|FBtr0332326||1);UPSTREAM(MODIFIER||103||1901|CG18304|protein_coding|CODING|FBtr0332327||1);DOWN…	-
FBtr0079366	2L_6942917_SNP	A	G	0.1607	27	141	1.31e-05	1.02e-05	0.755472	2L_6942917_SNP	G	SiteClass[FBgn0031869|CG18304|UPSTREAM|103;FBgn0031871|CG10158|DOWNSTREAM|261],TranscriptAnnot[UPSTREAM(MODIFIER||103||1895|CG18304|protein_coding|CODING|FBtr0079367||1);UPSTREAM(MODIFIER||103||1819|CG18304|protein_coding|CODING|FBtr0306285||1);UPSTREAM(MODIFIER||103||1813|CG18304|protein_coding|CODING|FBtr0332326||1);UPSTREAM(MODIFIER||103||1901|CG18304|protein_coding|CODING|FBtr0332327||1);DOWN…	-
FBgn0085447	3L_5721818_SNP	T	A	0.05202	9	164	1.3e-05	1.04e-05	0.755472	3L_5721818_SNP	A	SiteClass[FBgn0085447|sif|INTRON|0],TranscriptAnnot[INTRON(MODIFIER||||2072|sif|protein_coding|CODING|FBtr0112708|23|1);INTRON(MODIFIER||||2052|sif|protein_coding|CODING|FBtr0112709|11|1);INTRON(MODIFIER||||2061|sif|protein_coding|CODING|FBtr0112710|11|1);INTRON(MODIFIER||||2657|sif|protein_coding|CODING|FBtr0112712|22|1);INTRON(MODIFIER||||2072|sif|protein_coding|CODING|FBtr0330122|23|1);INTRON(…	-	FBgn0085447	The gene still life is referred to in FlyBase by the symbol Dmel\sif (CG34418, FBgn0085447). It is a protein_coding_gene from Drosophila melanogaster. It has 13 annotated transcripts and 13 polypeptides (12 unique). Gene sequence location is 3L:5657913..5749599. It has the cytological map location 64E5. Protein features are: Dbl homology (DH) domain; Guanine-nucleotide dissociation stimulator, CD…
FBtr0112708	3L_5721818_SNP	T	A	0.05202	9	164	1.3e-05	1.04e-05	0.755472	3L_5721818_SNP	A	SiteClass[FBgn0085447|sif|INTRON|0],TranscriptAnnot[INTRON(MODIFIER||||2072|sif|protein_coding|CODING|FBtr0112708|23|1);INTRON(MODIFIER||||2052|sif|protein_coding|CODING|FBtr0112709|11|1);INTRON(MODIFIER||||2061|sif|protein_coding|CODING|FBtr0112710|11|1);INTRON(MODIFIER||||2657|sif|protein_coding|CODING|FBtr0112712|22|1);INTRON(MODIFIER||||2072|sif|protein_coding|CODING|FBtr0330122|23|1);INTRON(…	-
FBtr0112709	3L_5721818_SNP	T	A	0.05202	9	164	1.3e-05	1.04e-05	0.755472	3L_5721818_SNP	A	SiteClass[FBgn0085447|sif|INTRON|0],TranscriptAnnot[INTRON(MODIFIER||||2072|sif|protein_coding|CODING|FBtr0112708|23|1);INTRON(MODIFIER||||2052|sif|protein_coding|CODING|FBtr0112709|11|1);INTRON(MODIFIER||||2061|sif|protein_coding|CODING|FBtr0112710|11|1);INTRON(MODIFIER||||2657|sif|protein_coding|CODING|FBtr0112712|22|1);INTRON(MODIFIER||||2072|sif|protein_coding|CODING|FBtr0330122|23|1);INTRON(…	-
FBtr0112710	3L_5721818_SNP	T	A	0.05202	9	164	1.3e-05	1.04e-05	0.755472	3L_5721818_SNP	A	SiteClass[FBgn0085447|sif|INTRON|0],TranscriptAnnot[INTRON(MODIFIER||||2072|sif|protein_coding|CODING|FBtr0112708|23|1);INTRON(MODIFIER||||2052|sif|protein_coding|CODING|FBtr0112709|11|1);INTRON(MODIFIER||||2061|sif|protein_coding|CODING|FBtr0112710|11|1);INTRON(MODIFIER||||2657|sif|protein_coding|CODING|FBtr0112712|22|1);INTRON(MODIFIER||||2072|sif|protein_coding|CODING|FBtr0330122|23|1);INTRON(…	-
FBtr0112712	3L_5721818_SNP	T	A	0.05202	9	164	1.3e-05	1.04e-05	0.755472	3L_5721818_SNP	A	SiteClass[FBgn0085447|sif|INTRON|0],TranscriptAnnot[INTRON(MODIFIER||||2072|sif|protein_coding|CODING|FBtr0112708|23|1);INTRON(MODIFIER||||2052|sif|protein_coding|CODING|FBtr0112709|11|1);INTRON(MODIFIER||||2061|sif|protein_coding|CODING|FBtr0112710|11|1);INTRON(MODIFIER||||2657|sif|protein_coding|CODING|FBtr0112712|22|1);INTRON(MODIFIER||||2072|sif|protein_coding|CODING|FBtr0330122|23|1);INTRON(…	-
FBtr0330122	3L_5721818_SNP	T	A	0.05202	9	164	1.3e-05	1.04e-05	0.755472	3L_5721818_SNP	A	SiteClass[FBgn0085447|sif|INTRON|0],TranscriptAnnot[INTRON(MODIFIER||||2072|sif|protein_coding|CODING|FBtr0112708|23|1);INTRON(MODIFIER||||2052|sif|protein_coding|CODING|FBtr0112709|11|1);INTRON(MODIFIER||||2061|sif|protein_coding|CODING|FBtr0112710|11|1);INTRON(MODIFIER||||2657|sif|protein_coding|CODING|FBtr0112712|22|1);INTRON(MODIFIER||||2072|sif|protein_coding|CODING|FBtr0330122|23|1);INTRON(…	-
FBtr0330123	3L_5721818_SNP	T	A	0.05202	9	164	1.3e-05	1.04e-05	0.755472	3L_5721818_SNP	A	SiteClass[FBgn0085447|sif|INTRON|0],TranscriptAnnot[INTRON(MODIFIER||||2072|sif|protein_coding|CODING|FBtr0112708|23|1);INTRON(MODIFIER||||2052|sif|protein_coding|CODING|FBtr0112709|11|1);INTRON(MODIFIER||||2061|sif|protein_coding|CODING|FBtr0112710|11|1);INTRON(MODIFIER||||2657|sif|protein_coding|CODING|FBtr0112712|22|1);INTRON(MODIFIER||||2072|sif|protein_coding|CODING|FBtr0330122|23|1);INTRON(…	-
FBtr0330124	3L_5721818_SNP	T	A	0.05202	9	164	1.3e-05	1.04e-05	0.755472	3L_5721818_SNP	A	SiteClass[FBgn0085447|sif|INTRON|0],TranscriptAnnot[INTRON(MODIFIER||||2072|sif|protein_coding|CODING|FBtr0112708|23|1);INTRON(MODIFIER||||2052|sif|protein_coding|CODING|FBtr0112709|11|1);INTRON(MODIFIER||||2061|sif|protein_coding|CODING|FBtr0112710|11|1);INTRON(MODIFIER||||2657|sif|protein_coding|CODING|FBtr0112712|22|1);INTRON(MODIFIER||||2072|sif|protein_coding|CODING|FBtr0330122|23|1);INTRON(…	-
FBtr0330125	3L_5721818_SNP	T	A	0.05202	9	164	1.3e-05	1.04e-05	0.755472	3L_5721818_SNP	A	SiteClass[FBgn0085447|sif|INTRON|0],TranscriptAnnot[INTRON(MODIFIER||||2072|sif|protein_coding|CODING|FBtr0112708|23|1);INTRON(MODIFIER||||2052|sif|protein_coding|CODING|FBtr0112709|11|1);INTRON(MODIFIER||||2061|sif|protein_coding|CODING|FBtr0112710|11|1);INTRON(MODIFIER||||2657|sif|protein_coding|CODING|FBtr0112712|22|1);INTRON(MODIFIER||||2072|sif|protein_coding|CODING|FBtr0330122|23|1);INTRON(…	-
FBtr0330126	3L_5721818_SNP	T	A	0.05202	9	164	1.3e-05	1.04e-05	0.755472	3L_5721818_SNP	A	SiteClass[FBgn0085447|sif|INTRON|0],TranscriptAnnot[INTRON(MODIFIER||||2072|sif|protein_coding|CODING|FBtr0112708|23|1);INTRON(MODIFIER||||2052|sif|protein_coding|CODING|FBtr0112709|11|1);INTRON(MODIFIER||||2061|sif|protein_coding|CODING|FBtr0112710|11|1);INTRON(MODIFIER||||2657|sif|protein_coding|CODING|FBtr0112712|22|1);INTRON(MODIFIER||||2072|sif|protein_coding|CODING|FBtr0330122|23|1);INTRON(…	-
FBtr0340654	3L_5721818_SNP	T	A	0.05202	9	164	1.3e-05	1.04e-05	0.755472	3L_5721818_SNP	A	SiteClass[FBgn0085447|sif|INTRON|0],TranscriptAnnot[INTRON(MODIFIER||||2072|sif|protein_coding|CODING|FBtr0112708|23|1);INTRON(MODIFIER||||2052|sif|protein_coding|CODING|FBtr0112709|11|1);INTRON(MODIFIER||||2061|sif|protein_coding|CODING|FBtr0112710|11|1);INTRON(MODIFIER||||2657|sif|protein_coding|CODING|FBtr0112712|22|1);INTRON(MODIFIER||||2072|sif|protein_coding|CODING|FBtr0330122|23|1);INTRON(…	-
FBtr0340655	3L_5721818_SNP	T	A	0.05202	9	164	1.3e-05	1.04e-05	0.755472	3L_5721818_SNP	A	SiteClass[FBgn0085447|sif|INTRON|0],TranscriptAnnot[INTRON(MODIFIER||||2072|sif|protein_coding|CODING|FBtr0112708|23|1);INTRON(MODIFIER||||2052|sif|protein_coding|CODING|FBtr0112709|11|1);INTRON(MODIFIER||||2061|sif|protein_coding|CODING|FBtr0112710|11|1);INTRON(MODIFIER||||2657|sif|protein_coding|CODING|FBtr0112712|22|1);INTRON(MODIFIER||||2072|sif|protein_coding|CODING|FBtr0330122|23|1);INTRON(…	-
FBtr0340656	3L_5721818_SNP	T	A	0.05202	9	164	1.3e-05	1.04e-05	0.755472	3L_5721818_SNP	A	SiteClass[FBgn0085447|sif|INTRON|0],TranscriptAnnot[INTRON(MODIFIER||||2072|sif|protein_coding|CODING|FBtr0112708|23|1);INTRON(MODIFIER||||2052|sif|protein_coding|CODING|FBtr0112709|11|1);INTRON(MODIFIER||||2061|sif|protein_coding|CODING|FBtr0112710|11|1);INTRON(MODIFIER||||2657|sif|protein_coding|CODING|FBtr0112712|22|1);INTRON(MODIFIER||||2072|sif|protein_coding|CODING|FBtr0330122|23|1);INTRON(…	-
FBgn0030240	X_10743302_SNP	C	G	0.1131	19	149	7.42e-06	1.07e-05	0.755472	X_10743302_SNP	G	SiteClass[FBgn0030240|CG2202|SYNONYMOUS_CODING|0;FBgn0030239|CG17333|DOWNSTREAM|735],TranscriptAnnot[SYNONYMOUS_CODING(LOW|SILENT|ctG/ctC|L125|889|CG2202|protein_coding|CODING|FBtr0073380|1|1);DOWNSTREAM(MODIFIER||735||243|CG17333|protein_coding|CODING|FBtr0073379||1)]	(TF_binding_site|BDTNP1_TFBS_dl|FBsf0000318251);(TF_binding_site|BDTNP1_TFBS_sna|FBsf0000270163);(TF_binding_site|BDTNP1_TFBS_twi|FBsf0000205669);(TF_binding_site|mE1_TFBS_cad|FBsf0000243206);(TF_binding_site|mE1_TFBS_chinmo|FBsf0000208710);(TF_binding_site|mE1_TFBS_HSA|FBsf0000381330)	FBgn0030240	This gene is referred to in FlyBase by the symbol Dmel\CG2202 (FBgn0030240). It is a protein_coding_gene from Drosophila melanogaster. It has one annotated transcript and one polypeptide. Gene sequence location is X:10848757..10852327. It has the cytological map location 9F5. Protein features are: Zinc finger C2H2-type/integrase DNA-binding domain; Zinc finger, AD-type; Zinc finger, C2H2; Zinc fi…
FBgn0030239	X_10743302_SNP	C	G	0.1131	19	149	7.42e-06	1.07e-05	0.755472	X_10743302_SNP	G	SiteClass[FBgn0030240|CG2202|SYNONYMOUS_CODING|0;FBgn0030239|CG17333|DOWNSTREAM|735],TranscriptAnnot[SYNONYMOUS_CODING(LOW|SILENT|ctG/ctC|L125|889|CG2202|protein_coding|CODING|FBtr0073380|1|1);DOWNSTREAM(MODIFIER||735||243|CG17333|protein_coding|CODING|FBtr0073379||1)]	(TF_binding_site|BDTNP1_TFBS_dl|FBsf0000318251);(TF_binding_site|BDTNP1_TFBS_sna|FBsf0000270163);(TF_binding_site|BDTNP1_TFBS_twi|FBsf0000205669);(TF_binding_site|mE1_TFBS_cad|FBsf0000243206);(TF_binding_site|mE1_TFBS_chinmo|FBsf0000208710);(TF_binding_site|mE1_TFBS_HSA|FBsf0000381330)	FBgn0030239	This gene is referred to in FlyBase by the symbol Dmel\CG17333 (FBgn0030239). It is a protein_coding_gene from Drosophila melanogaster. It has one annotated transcript and one polypeptide. Gene sequence location is X:10847438..10848534. It has the cytological map location 9F5. Protein features are: 6-phosphogluconolactonase, DevB-type; Glucosamine/galactosamine-6-phosphate isomerase. Its molecula…
FBtr0073380	X_10743302_SNP	C	G	0.1131	19	149	7.42e-06	1.07e-05	0.755472	X_10743302_SNP	G	SiteClass[FBgn0030240|CG2202|SYNONYMOUS_CODING|0;FBgn0030239|CG17333|DOWNSTREAM|735],TranscriptAnnot[SYNONYMOUS_CODING(LOW|SILENT|ctG/ctC|L125|889|CG2202|protein_coding|CODING|FBtr0073380|1|1);DOWNSTREAM(MODIFIER||735||243|CG17333|protein_coding|CODING|FBtr0073379||1)]	(TF_binding_site|BDTNP1_TFBS_dl|FBsf0000318251);(TF_binding_site|BDTNP1_TFBS_sna|FBsf0000270163);(TF_binding_site|BDTNP1_TFBS_twi|FBsf0000205669);(TF_binding_site|mE1_TFBS_cad|FBsf0000243206);(TF_binding_site|mE1_TFBS_chinmo|FBsf0000208710);(TF_binding_site|mE1_TFBS_HSA|FBsf0000381330)
FBtr0073379	X_10743302_SNP	C	G	0.1131	19	149	7.42e-06	1.07e-05	0.755472	X_10743302_SNP	G	SiteClass[FBgn0030240|CG2202|SYNONYMOUS_CODING|0;FBgn0030239|CG17333|DOWNSTREAM|735],TranscriptAnnot[SYNONYMOUS_CODING(LOW|SILENT|ctG/ctC|L125|889|CG2202|protein_coding|CODING|FBtr0073380|1|1);DOWNSTREAM(MODIFIER||735||243|CG17333|protein_coding|CODING|FBtr0073379||1)]	(TF_binding_site|BDTNP1_TFBS_dl|FBsf0000318251);(TF_binding_site|BDTNP1_TFBS_sna|FBsf0000270163);(TF_binding_site|BDTNP1_TFBS_twi|FBsf0000205669);(TF_binding_site|mE1_TFBS_cad|FBsf0000243206);(TF_binding_site|mE1_TFBS_chinmo|FBsf0000208710);(TF_binding_site|mE1_TFBS_HSA|FBsf0000381330)
FBgn0266429	X_3481076_SNP	G	T	0.2014	29	115	1.77e-05	1.17e-05	0.759221	X_3481076_SNP	T	SiteClass[FBgn0266429|AstA-R1|INTRON|0],TranscriptAnnot[INTRON(MODIFIER||||394|AstA-R1|protein_coding|CODING|FBtr0070575|1|1);INTRON(MODIFIER||||394|AstA-R1|protein_coding|CODING|FBtr0333798|1|1)]	-	FBgn0266429	The gene Allatostatin A receptor 1 is referred to in FlyBase by the symbol Dmel\AstA-R1 (CG2872, FBgn0266429). It is a protein_coding_gene from Drosophila melanogaster. It has 2 annotated transcripts and 2 polypeptides (1 unique). Gene sequence location is X:3574536..3666724. It has the cytological map location 3D6-3E2. Protein features are: G protein-coupled receptor, rhodopsin-like; GPCR, rhodo…
FBtr0070575	X_3481076_SNP	G	T	0.2014	29	115	1.77e-05	1.17e-05	0.759221	X_3481076_SNP	T	SiteClass[FBgn0266429|AstA-R1|INTRON|0],TranscriptAnnot[INTRON(MODIFIER||||394|AstA-R1|protein_coding|CODING|FBtr0070575|1|1);INTRON(MODIFIER||||394|AstA-R1|protein_coding|CODING|FBtr0333798|1|1)]	-
FBtr0333798	X_3481076_SNP	G	T	0.2014	29	115	1.77e-05	1.17e-05	0.759221	X_3481076_SNP	T	SiteClass[FBgn0266429|AstA-R1|INTRON|0],TranscriptAnnot[INTRON(MODIFIER||||394|AstA-R1|protein_coding|CODING|FBtr0070575|1|1);INTRON(MODIFIER||||394|AstA-R1|protein_coding|CODING|FBtr0333798|1|1)]	-
FBgn0250867	2L_20992646_SNP	A	G	0.0565	10	167	1.54e-05	1.21e-05	0.759221	2L_20992646_SNP	G	SiteClass[FBgn0250867|CG42238|INTRON|0],TranscriptAnnot[INTRON(MODIFIER||||148|CG42238|protein_coding|CODING|FBtr0290305|1|1);INTRON(MODIFIER||||100|CG42238|protein_coding|CODING|FBtr0331199|5|1)]	-	FBgn0250867	This	gene	is	referred	to	in	FlyBase	by	the	symbol	Dmel\CG42238	(FBgn0250867).	It	is	a	protein_coding_gene	from	Drosophila	melanogaster.	It	has	5	annotated	transcripts	and	5	polypeptides	(2	unique).	Gene	sequence	location	is	2L:20965520..21052164.	It
FBtr0290305	2L_20992646_SNP	A	G	0.0565	10	167	1.54e-05	1.21e-05	0.759221	2L_20992646_SNP	G	SiteClass[FBgn0250867|CG42238|INTRON|0],TranscriptAnnot[INTRON(MODIFIER||||148|CG42238|protein_coding|CODING|FBtr0290305|1|1);INTRON(MODIFIER||||100|CG42238|protein_coding|CODING|FBtr0331199|5|1)]	-
FBtr0331199	2L_20992646_SNP	A	G	0.0565	10	167	1.54e-05	1.21e-05	0.759221	2L_20992646_SNP	G	SiteClass[FBgn0250867|CG42238|INTRON|0],TranscriptAnnot[INTRON(MODIFIER||||148|CG42238|protein_coding|CODING|FBtr0290305|1|1);INTRON(MODIFIER||||100|CG42238|protein_coding|CODING|FBtr0331199|5|1)]	-
FBgn0032857	2L_20392466_SNP	A	C	0.09697	16	149	2.1e-05	1.23e-05	0.759221	2L_20392466_SNP	C	SiteClass[FBgn0032857|CG10947|INTRON|0],TranscriptAnnot[INTRON(MODIFIER||||404|CG10947|protein_coding|CODING|FBtr0081369|1|1);INTRON(MODIFIER||||404|CG10947|protein_coding|CODING|FBtr0081370|1|1);INTRON(MODIFIER||||404|CG10947|protein_coding|CODING|FBtr0336750|1|1)]	-	FBgn0032857	This gene is referred to in FlyBase by the symbol Dmel\CG10947 (FBgn0032857). It is a protein_coding_gene from Drosophila melanogaster. It has 3 annotated transcripts and 3 polypeptides (1 unique). Gene sequence location is 2L:20385293..20414800. It has the cytological map location 38C6. Protein features are: Lysine methyltransferase; S-adenosyl-L-methionine-dependent methyltransferase. Its molec…
FBtr0081369	2L_20392466_SNP	A	C	0.09697	16	149	2.1e-05	1.23e-05	0.759221	2L_20392466_SNP	C	SiteClass[FBgn0032857|CG10947|INTRON|0],TranscriptAnnot[INTRON(MODIFIER||||404|CG10947|protein_coding|CODING|FBtr0081369|1|1);INTRON(MODIFIER||||404|CG10947|protein_coding|CODING|FBtr0081370|1|1);INTRON(MODIFIER||||404|CG10947|protein_coding|CODING|FBtr0336750|1|1)]	-
FBtr0081370	2L_20392466_SNP	A	C	0.09697	16	149	2.1e-05	1.23e-05	0.759221	2L_20392466_SNP	C	SiteClass[FBgn0032857|CG10947|INTRON|0],TranscriptAnnot[INTRON(MODIFIER||||404|CG10947|protein_coding|CODING|FBtr0081369|1|1);INTRON(MODIFIER||||404|CG10947|protein_coding|CODING|FBtr0081370|1|1);INTRON(MODIFIER||||404|CG10947|protein_coding|CODING|FBtr0336750|1|1)]	-
FBtr0336750	2L_20392466_SNP	A	C	0.09697	16	149	2.1e-05	1.23e-05	0.759221	2L_20392466_SNP	C	SiteClass[FBgn0032857|CG10947|INTRON|0],TranscriptAnnot[INTRON(MODIFIER||||404|CG10947|protein_coding|CODING|FBtr0081369|1|1);INTRON(MODIFIER||||404|CG10947|protein_coding|CODING|FBtr0081370|1|1);INTRON(MODIFIER||||404|CG10947|protein_coding|CODING|FBtr0336750|1|1)]	-
FBgn0032132	2L_9598332_SNP	C	T	0.4583	77	91	1.96e-05	1.29e-05	0.759221	2L_9598332_SNP	T	SiteClass[FBgn0032132|CG4382|DOWNSTREAM|548],TranscriptAnnot[DOWNSTREAM(MODIFIER||548||580|CG4382|protein_coding|CODING|FBtr0114535||1);INTERGENIC(MODIFIER||||||||||1)]	(regulatory_region|REDfly_CRMs|FBsf0000435498);(regulatory_region|REDfly_CRMs|FBsf0000435794);(regulatory_region|REDfly_CRMs|FBsf0000436533);(TF_binding_site|BDTNP1_TFBS_twi|FBsf0000201348)	FBgn0032132	This gene is referred to in FlyBase by the symbol Dmel\CG4382 (FBgn0032132). It is a protein_coding_gene from Drosophila melanogaster. It has one annotated transcript and one polypeptide. Gene sequence location is 2L:9598880..9600872. It has the cytological map location 30C1. Protein features are: Alpha/Beta hydrolase fold; Carboxylesterase, type B. Its molecular function is described by: carboxy…
FBtr0114535	2L_9598332_SNP	C	T	0.4583	77	91	1.96e-05	1.29e-05	0.759221	2L_9598332_SNP	T	SiteClass[FBgn0032132|CG4382|DOWNSTREAM|548],TranscriptAnnot[DOWNSTREAM(MODIFIER||548||580|CG4382|protein_coding|CODING|FBtr0114535||1);INTERGENIC(MODIFIER||||||||||1)]	(regulatory_region|REDfly_CRMs|FBsf0000435498);(regulatory_region|REDfly_CRMs|FBsf0000435794);(regulatory_region|REDfly_CRMs|FBsf0000436533);(TF_binding_site|BDTNP1_TFBS_twi|FBsf0000201348)
FBgn0043854	2L_6372522_SNP	T	C	0.1964	33	135	7.19e-06	1.37e-05	0.759221	2L_6372522_SNP	C	SiteClass[FBgn0043854|slam|UPSTREAM|993],TranscriptAnnot[UTR_5_PRIME(MODIFIER||1055||1173|slam|protein_coding|CODING|FBtr0290281|1|1);UPSTREAM(MODIFIER||993||1173|slam|protein_coding|CODING|FBtr0344864||1)]	(TF_binding_site|BDTNP1_TFBS_bcd|FBsf0000333637);(TF_binding_site|BDTNP1_TFBS_dl|FBsf0000297023);(TF_binding_site|BDTNP1_TFBS_gt|FBsf0000293073);(TF_binding_site|BDTNP1_TFBS_twi|FBsf0000201018);(TF_binding_site|mE1_TFBS_cad|FBsf0000241513)	FBgn0043854	The gene slow as molasses is referred to in FlyBase by the symbol Dmel\slam (CG9506, FBgn0043854). It is a protein_coding_gene from Drosophila melanogaster. It has 2 annotated transcripts and 2 polypeptides (1 unique). Gene sequence location is 2L:6372388..6377284. It has the cytological map location 26C4. Its molecular function is unknown. It is involved in the biological process described with:…
FBtr0290281	2L_6372522_SNP	T	C	0.1964	33	135	7.19e-06	1.37e-05	0.759221	2L_6372522_SNP	C	SiteClass[FBgn0043854|slam|UPSTREAM|993],TranscriptAnnot[UTR_5_PRIME(MODIFIER||1055||1173|slam|protein_coding|CODING|FBtr0290281|1|1);UPSTREAM(MODIFIER||993||1173|slam|protein_coding|CODING|FBtr0344864||1)]	(TF_binding_site|BDTNP1_TFBS_bcd|FBsf0000333637);(TF_binding_site|BDTNP1_TFBS_dl|FBsf0000297023);(TF_binding_site|BDTNP1_TFBS_gt|FBsf0000293073);(TF_binding_site|BDTNP1_TFBS_twi|FBsf0000201018);(TF_binding_site|mE1_TFBS_cad|FBsf0000241513)
FBtr0344864	2L_6372522_SNP	T	C	0.1964	33	135	7.19e-06	1.37e-05	0.759221	2L_6372522_SNP	C	SiteClass[FBgn0043854|slam|UPSTREAM|993],TranscriptAnnot[UTR_5_PRIME(MODIFIER||1055||1173|slam|protein_coding|CODING|FBtr0290281|1|1);UPSTREAM(MODIFIER||993||1173|slam|protein_coding|CODING|FBtr0344864||1)]	(TF_binding_site|BDTNP1_TFBS_bcd|FBsf0000333637);(TF_binding_site|BDTNP1_TFBS_dl|FBsf0000297023);(TF_binding_site|BDTNP1_TFBS_gt|FBsf0000293073);(TF_binding_site|BDTNP1_TFBS_twi|FBsf0000201018);(TF_binding_site|mE1_TFBS_cad|FBsf0000241513)
FBgn0053458	2R_12374265_SNP	C	T	0.1771	31	144	1.4e-05	1.46e-05	0.759221	2R_12374265_SNP	T	SiteClass[FBgn0053458|CG33458|SYNONYMOUS_CODING|0],TranscriptAnnot[SYNONYMOUS_CODING(LOW|SILENT|tgT/tgC|C29|281|CG33458|protein_coding|CODING|FBtr0087085|1|1)]	-	FBgn0053458	This gene is referred to in FlyBase by the symbol Dmel\CG33458 (FBgn0053458). It is a protein_coding_gene from Drosophila melanogaster. It has one annotated transcript and one polypeptide. Gene sequence location is 2R:16486674..16487801. It has the cytological map location 53C6. Protein features are: Peptidase S1, PA clan; Peptidase S1, trypsin family, active site; Peptidase S1A, chymotrypsin-typ…
FBtr0087085	2R_12374265_SNP	C	T	0.1771	31	144	1.4e-05	1.46e-05	0.759221	2R_12374265_SNP	T	SiteClass[FBgn0053458|CG33458|SYNONYMOUS_CODING|0],TranscriptAnnot[SYNONYMOUS_CODING(LOW|SILENT|tgT/tgC|C29|281|CG33458|protein_coding|CODING|FBtr0087085|1|1)]	-
FBgn0260799	2R_486267_SNP	T	A	0.0828	13	144	1.85e-05	1.47e-05	0.759221	2R_486267_SNP	A	SiteClass[FBgn0260799|p120ctn|INTRON|0],TranscriptAnnot[INTRON(MODIFIER||||781|p120ctn|protein_coding|CODING|FBtr0111114|1|1)]	(transposable_element|FlyBase|FBti0060848)	FBgn0260799	The gene Adherens junction protein p120 is referred to in FlyBase by the symbol Dmel\p120ctn (CG17484, FBgn0260799). It is a protein_coding_gene from Drosophila melanogaster. It has one annotated transcript and one polypeptide. Gene sequence location is 2R:4595288..4609492. It has the cytological map location 41B1. Protein features are: Armadillo; Armadillo-like helical; Armadillo-type fold; Juxt…
FBtr0111114	2R_486267_SNP	T	A	0.0828	13	144	1.85e-05	1.47e-05	0.759221	2R_486267_SNP	A	SiteClass[FBgn0260799|p120ctn|INTRON|0],TranscriptAnnot[INTRON(MODIFIER||||781|p120ctn|protein_coding|CODING|FBtr0111114|1|1)]	(transposable_element|FlyBase|FBti0060848)
FBgn0034091	2R_12102290_SNP	T	A	0.09143	16	159	1.57e-05	1.56e-05	0.759221	2R_12102290_SNP	A	SiteClass[FBgn0034091|mrj|INTRON|0],TranscriptAnnot[INTRON(MODIFIER||||346|mrj|protein_coding|CODING|FBtr0332855|2|1);INTRON(MODIFIER||||259|mrj|protein_coding|CODING|FBtr0087193|1|1)]	-	FBgn0034091	The gene mrj is referred to in FlyBase by the symbol Dmel\mrj (CG8448, FBgn0034091). It is a protein_coding_gene from Drosophila melanogaster. It has 8 annotated transcripts and 8 polypeptides (3 unique). Gene sequence location is 2R:16203329..16221793. It has the cytological map location 52F8-52F11. Protein features are: DnaJ domain; DnaJ domain, conserved site. Its molecular function is describ…
FBtr0332855	2R_12102290_SNP	T	A	0.09143	16	159	1.57e-05	1.56e-05	0.759221	2R_12102290_SNP	A	SiteClass[FBgn0034091|mrj|INTRON|0],TranscriptAnnot[INTRON(MODIFIER||||346|mrj|protein_coding|CODING|FBtr0332855|2|1);INTRON(MODIFIER||||259|mrj|protein_coding|CODING|FBtr0087193|1|1)]	-
FBtr0087193	2R_12102290_SNP	T	A	0.09143	16	159	1.57e-05	1.56e-05	0.759221	2R_12102290_SNP	A	SiteClass[FBgn0034091|mrj|INTRON|0],TranscriptAnnot[INTRON(MODIFIER||||346|mrj|protein_coding|CODING|FBtr0332855|2|1);INTRON(MODIFIER||||259|mrj|protein_coding|CODING|FBtr0087193|1|1)]	-
FBgn0004842	3R_22871601_SNP	C	T	0.4878	80	84	2.68e-05	1.58e-05	0.759221	3R_22871601_SNP	T	SiteClass[FBgn0004842|RYa-R|INTRON|0],TranscriptAnnot[INTRON(MODIFIER||||464|RYa-R|protein_coding|CODING|FBtr0085100|4|1);INTRON(MODIFIER||||518|RYa-R|protein_coding|CODING|FBtr0345267|4|1);INTRON(MODIFIER||||467|RYa-R|protein_coding|CODING|FBtr0345268|4|1)]	-	FBgn0004842	The gene RYamide receptor is referred to in FlyBase by the symbol Dmel\RYa-R (CG5811, FBgn0004842). It is a protein_coding_gene from Drosophila melanogaster. It has 3 annotated transcripts and 3 polypeptides (all unique). Gene sequence location is 3R:26996980..27057935. It has the cytological map location 97D12-97E1. Protein features are: G protein-coupled receptor, rhodopsin-like; GPCR, rhodopsi…
FBtr0085100	3R_22871601_SNP	C	T	0.4878	80	84	2.68e-05	1.58e-05	0.759221	3R_22871601_SNP	T	SiteClass[FBgn0004842|RYa-R|INTRON|0],TranscriptAnnot[INTRON(MODIFIER||||464|RYa-R|protein_coding|CODING|FBtr0085100|4|1);INTRON(MODIFIER||||518|RYa-R|protein_coding|CODING|FBtr0345267|4|1);INTRON(MODIFIER||||467|RYa-R|protein_coding|CODING|FBtr0345268|4|1)]	-
FBtr0345267	3R_22871601_SNP	C	T	0.4878	80	84	2.68e-05	1.58e-05	0.759221	3R_22871601_SNP	T	SiteClass[FBgn0004842|RYa-R|INTRON|0],TranscriptAnnot[INTRON(MODIFIER||||464|RYa-R|protein_coding|CODING|FBtr0085100|4|1);INTRON(MODIFIER||||518|RYa-R|protein_coding|CODING|FBtr0345267|4|1);INTRON(MODIFIER||||467|RYa-R|protein_coding|CODING|FBtr0345268|4|1)]	-
FBtr0345268	3R_22871601_SNP	C	T	0.4878	80	84	2.68e-05	1.58e-05	0.759221	3R_22871601_SNP	T	SiteClass[FBgn0004842|RYa-R|INTRON|0],TranscriptAnnot[INTRON(MODIFIER||||464|RYa-R|protein_coding|CODING|FBtr0085100|4|1);INTRON(MODIFIER||||518|RYa-R|protein_coding|CODING|FBtr0345267|4|1);INTRON(MODIFIER||||467|RYa-R|protein_coding|CODING|FBtr0345268|4|1)]	-
FBgn0267001	X_12195790_SNP	G	A	0.1761	31	145	1.51e-05	1.62e-05	0.759221	X_12195790_SNP	A	SiteClass[FBgn0267001|Ten-a|INTRON|0],TranscriptAnnot[INTRON(MODIFIER||||3004|Ten-a|protein_coding|CODING|FBtr0299858|9|1);INTRON(MODIFIER||||3378|Ten-a|protein_coding|CODING|FBtr0299859|13|1);INTRON(MODIFIER||||3004|Ten-a|protein_coding|CODING|FBtr0299860|14|1);INTRON(MODIFIER||||2902|Ten-a|protein_coding|CODING|FBtr0300201|8|1);INTRON(MODIFIER||||3004|Ten-a|protein_coding|CODING|FBtr0300203|15|…	-	FBgn0267001	The gene Tenascin accessory is referred to in FlyBase by the symbol Dmel\Ten-a (CG42338, FBgn0267001). It is a protein_coding_gene from Drosophila melanogaster. It has 11 annotated transcripts and 11 polypeptides (5 unique). Gene sequence location is X:12043698..12335214. It has the cytological map location 11A6. Protein features are: EGF-like domain; EGF-like domain, extracellular; EGF-like, con…
FBtr0299858	X_12195790_SNP	G	A	0.1761	31	145	1.51e-05	1.62e-05	0.759221	X_12195790_SNP	A	SiteClass[FBgn0267001|Ten-a|INTRON|0],TranscriptAnnot[INTRON(MODIFIER||||3004|Ten-a|protein_coding|CODING|FBtr0299858|9|1);INTRON(MODIFIER||||3378|Ten-a|protein_coding|CODING|FBtr0299859|13|1);INTRON(MODIFIER||||3004|Ten-a|protein_coding|CODING|FBtr0299860|14|1);INTRON(MODIFIER||||2902|Ten-a|protein_coding|CODING|FBtr0300201|8|1);INTRON(MODIFIER||||3004|Ten-a|protein_coding|CODING|FBtr0300203|15|…	-
FBtr0299859	X_12195790_SNP	G	A	0.1761	31	145	1.51e-05	1.62e-05	0.759221	X_12195790_SNP	A	SiteClass[FBgn0267001|Ten-a|INTRON|0],TranscriptAnnot[INTRON(MODIFIER||||3004|Ten-a|protein_coding|CODING|FBtr0299858|9|1);INTRON(MODIFIER||||3378|Ten-a|protein_coding|CODING|FBtr0299859|13|1);INTRON(MODIFIER||||3004|Ten-a|protein_coding|CODING|FBtr0299860|14|1);INTRON(MODIFIER||||2902|Ten-a|protein_coding|CODING|FBtr0300201|8|1);INTRON(MODIFIER||||3004|Ten-a|protein_coding|CODING|FBtr0300203|15|…	-
FBtr0299860	X_12195790_SNP	G	A	0.1761	31	145	1.51e-05	1.62e-05	0.759221	X_12195790_SNP	A	SiteClass[FBgn0267001|Ten-a|INTRON|0],TranscriptAnnot[INTRON(MODIFIER||||3004|Ten-a|protein_coding|CODING|FBtr0299858|9|1);INTRON(MODIFIER||||3378|Ten-a|protein_coding|CODING|FBtr0299859|13|1);INTRON(MODIFIER||||3004|Ten-a|protein_coding|CODING|FBtr0299860|14|1);INTRON(MODIFIER||||2902|Ten-a|protein_coding|CODING|FBtr0300201|8|1);INTRON(MODIFIER||||3004|Ten-a|protein_coding|CODING|FBtr0300203|15|…	-
FBtr0300201	X_12195790_SNP	G	A	0.1761	31	145	1.51e-05	1.62e-05	0.759221	X_12195790_SNP	A	SiteClass[FBgn0267001|Ten-a|INTRON|0],TranscriptAnnot[INTRON(MODIFIER||||3004|Ten-a|protein_coding|CODING|FBtr0299858|9|1);INTRON(MODIFIER||||3378|Ten-a|protein_coding|CODING|FBtr0299859|13|1);INTRON(MODIFIER||||3004|Ten-a|protein_coding|CODING|FBtr0299860|14|1);INTRON(MODIFIER||||2902|Ten-a|protein_coding|CODING|FBtr0300201|8|1);INTRON(MODIFIER||||3004|Ten-a|protein_coding|CODING|FBtr0300203|15|…	-
FBtr0300203	X_12195790_SNP	G	A	0.1761	31	145	1.51e-05	1.62e-05	0.759221	X_12195790_SNP	A	SiteClass[FBgn0267001|Ten-a|INTRON|0],TranscriptAnnot[INTRON(MODIFIER||||3004|Ten-a|protein_coding|CODING|FBtr0299858|9|1);INTRON(MODIFIER||||3378|Ten-a|protein_coding|CODING|FBtr0299859|13|1);INTRON(MODIFIER||||3004|Ten-a|protein_coding|CODING|FBtr0299860|14|1);INTRON(MODIFIER||||2902|Ten-a|protein_coding|CODING|FBtr0300201|8|1);INTRON(MODIFIER||||3004|Ten-a|protein_coding|CODING|FBtr0300203|15|…	-
FBtr0308221	X_12195790_SNP	G	A	0.1761	31	145	1.51e-05	1.62e-05	0.759221	X_12195790_SNP	A	SiteClass[FBgn0267001|Ten-a|INTRON|0],TranscriptAnnot[INTRON(MODIFIER||||3004|Ten-a|protein_coding|CODING|FBtr0299858|9|1);INTRON(MODIFIER||||3378|Ten-a|protein_coding|CODING|FBtr0299859|13|1);INTRON(MODIFIER||||3004|Ten-a|protein_coding|CODING|FBtr0299860|14|1);INTRON(MODIFIER||||2902|Ten-a|protein_coding|CODING|FBtr0300201|8|1);INTRON(MODIFIER||||3004|Ten-a|protein_coding|CODING|FBtr0300203|15|…	-
FBtr0310078	X_12195790_SNP	G	A	0.1761	31	145	1.51e-05	1.62e-05	0.759221	X_12195790_SNP	A	SiteClass[FBgn0267001|Ten-a|INTRON|0],TranscriptAnnot[INTRON(MODIFIER||||3004|Ten-a|protein_coding|CODING|FBtr0299858|9|1);INTRON(MODIFIER||||3378|Ten-a|protein_coding|CODING|FBtr0299859|13|1);INTRON(MODIFIER||||3004|Ten-a|protein_coding|CODING|FBtr0299860|14|1);INTRON(MODIFIER||||2902|Ten-a|protein_coding|CODING|FBtr0300201|8|1);INTRON(MODIFIER||||3004|Ten-a|protein_coding|CODING|FBtr0300203|15|…	-
FBtr0346335	X_12195790_SNP	G	A	0.1761	31	145	1.51e-05	1.62e-05	0.759221	X_12195790_SNP	A	SiteClass[FBgn0267001|Ten-a|INTRON|0],TranscriptAnnot[INTRON(MODIFIER||||3004|Ten-a|protein_coding|CODING|FBtr0299858|9|1);INTRON(MODIFIER||||3378|Ten-a|protein_coding|CODING|FBtr0299859|13|1);INTRON(MODIFIER||||3004|Ten-a|protein_coding|CODING|FBtr0299860|14|1);INTRON(MODIFIER||||2902|Ten-a|protein_coding|CODING|FBtr0300201|8|1);INTRON(MODIFIER||||3004|Ten-a|protein_coding|CODING|FBtr0300203|15|…	-
FBtr0308222	X_12195790_SNP	G	A	0.1761	31	145	1.51e-05	1.62e-05	0.759221	X_12195790_SNP	A	SiteClass[FBgn0267001|Ten-a|INTRON|0],TranscriptAnnot[INTRON(MODIFIER||||3004|Ten-a|protein_coding|CODING|FBtr0299858|9|1);INTRON(MODIFIER||||3378|Ten-a|protein_coding|CODING|FBtr0299859|13|1);INTRON(MODIFIER||||3004|Ten-a|protein_coding|CODING|FBtr0299860|14|1);INTRON(MODIFIER||||2902|Ten-a|protein_coding|CODING|FBtr0300201|8|1);INTRON(MODIFIER||||3004|Ten-a|protein_coding|CODING|FBtr0300203|15|…	-
FBtr0308223	X_12195790_SNP	G	A	0.1761	31	145	1.51e-05	1.62e-05	0.759221	X_12195790_SNP	A	SiteClass[FBgn0267001|Ten-a|INTRON|0],TranscriptAnnot[INTRON(MODIFIER||||3004|Ten-a|protein_coding|CODING|FBtr0299858|9|1);INTRON(MODIFIER||||3378|Ten-a|protein_coding|CODING|FBtr0299859|13|1);INTRON(MODIFIER||||3004|Ten-a|protein_coding|CODING|FBtr0299860|14|1);INTRON(MODIFIER||||2902|Ten-a|protein_coding|CODING|FBtr0300201|8|1);INTRON(MODIFIER||||3004|Ten-a|protein_coding|CODING|FBtr0300203|15|…	-
FBtr0346129	X_12195790_SNP	G	A	0.1761	31	145	1.51e-05	1.62e-05	0.759221	X_12195790_SNP	A	SiteClass[FBgn0267001|Ten-a|INTRON|0],TranscriptAnnot[INTRON(MODIFIER||||3004|Ten-a|protein_coding|CODING|FBtr0299858|9|1);INTRON(MODIFIER||||3378|Ten-a|protein_coding|CODING|FBtr0299859|13|1);INTRON(MODIFIER||||3004|Ten-a|protein_coding|CODING|FBtr0299860|14|1);INTRON(MODIFIER||||2902|Ten-a|protein_coding|CODING|FBtr0300201|8|1);INTRON(MODIFIER||||3004|Ten-a|protein_coding|CODING|FBtr0300203|15|…	-
FBgn0266369	2L_20921611_SNP	A	G	0.2437	39	121	3.08e-05	1.63e-05	0.759221	2L_20921611_SNP	G	SiteClass[FBgn0266369|Mtp|SYNONYMOUS_CODING|0],TranscriptAnnot[SYNONYMOUS_CODING(LOW|SILENT|tgC/tgT|C176|886|Mtp|protein_coding|CODING|FBtr0081439|2|1)]	(TF_binding_site|mE1_TFBS_sens|FBsf0000218525)	FBgn0266369	The gene Microsomal triacylglycerol transfer protein is referred to in FlyBase by the symbol Dmel\Mtp (CG9342, FBgn0266369). It is a protein_coding_gene from Drosophila melanogaster. It has one annotated transcript and one polypeptide. Gene sequence location is 2L:20919094..20922876. It has the cytological map location 38F5. Protein features are: Lipid transport protein, N-terminal; Lipid transpo…
FBtr0081439	2L_20921611_SNP	A	G	0.2437	39	121	3.08e-05	1.63e-05	0.759221	2L_20921611_SNP	G	SiteClass[FBgn0266369|Mtp|SYNONYMOUS_CODING|0],TranscriptAnnot[SYNONYMOUS_CODING(LOW|SILENT|tgC/tgT|C176|886|Mtp|protein_coding|CODING|FBtr0081439|2|1)]	(TF_binding_site|mE1_TFBS_sens|FBsf0000218525)
FBgn0036556	3L_15996860_SNP	C	G	0.1047	18	154	2.28e-05	1.76e-05	0.788861	3L_15996860_SNP	G	SiteClass[FBgn0036556|CG5830|INTRON|0],TranscriptAnnot[INTRON(MODIFIER||||329|CG5830|protein_coding|CODING|FBtr0075521|2|1);INTRON(MODIFIER||||352|CG5830|protein_coding|CODING|FBtr0333579|2|1)]	(TF_binding_site|BDTNP1_TFBS_dl|FBsf0000307844);(TF_binding_site|BDTNP1_TFBS_hb|FBsf0000291477)	FBgn0036556	This gene is referred to in FlyBase by the symbol Dmel\CG5830 (FBgn0036556). It is a protein_coding_gene from Drosophila melanogaster. It has 2 annotated transcripts and 2 polypeptides (all unique). Gene sequence location is 3L:15992669..16004736. It has the cytological map location 72C1-72C2. Protein features are: Dullard phosphatase domain, eukaryotic; FCP1 homology domain; HAD-like domain. Its…
FBtr0075521	3L_15996860_SNP	C	G	0.1047	18	154	2.28e-05	1.76e-05	0.788861	3L_15996860_SNP	G	SiteClass[FBgn0036556|CG5830|INTRON|0],TranscriptAnnot[INTRON(MODIFIER||||329|CG5830|protein_coding|CODING|FBtr0075521|2|1);INTRON(MODIFIER||||352|CG5830|protein_coding|CODING|FBtr0333579|2|1)]	(TF_binding_site|BDTNP1_TFBS_dl|FBsf0000307844);(TF_binding_site|BDTNP1_TFBS_hb|FBsf0000291477)
FBtr0333579	3L_15996860_SNP	C	G	0.1047	18	154	2.28e-05	1.76e-05	0.788861	3L_15996860_SNP	G	SiteClass[FBgn0036556|CG5830|INTRON|0],TranscriptAnnot[INTRON(MODIFIER||||329|CG5830|protein_coding|CODING|FBtr0075521|2|1);INTRON(MODIFIER||||352|CG5830|protein_coding|CODING|FBtr0333579|2|1)]	(TF_binding_site|BDTNP1_TFBS_dl|FBsf0000307844);(TF_binding_site|BDTNP1_TFBS_hb|FBsf0000291477)
FBgn0004842	3R_22871553_SNP	A	C	0.4417	72	91	1.69e-05	1.77e-05	0.788861	3R_22871553_SNP	C	SiteClass[FBgn0004842|RYa-R|INTRON|0],TranscriptAnnot[INTRON(MODIFIER||||464|RYa-R|protein_coding|CODING|FBtr0085100|4|1);INTRON(MODIFIER||||518|RYa-R|protein_coding|CODING|FBtr0345267|4|1);INTRON(MODIFIER||||467|RYa-R|protein_coding|CODING|FBtr0345268|4|1)]	-	FBgn0004842	The gene RYamide receptor is referred to in FlyBase by the symbol Dmel\RYa-R (CG5811, FBgn0004842). It is a protein_coding_gene from Drosophila melanogaster. It has 3 annotated transcripts and 3 polypeptides (all unique). Gene sequence location is 3R:26996980..27057935. It has the cytological map location 97D12-97E1. Protein features are: G protein-coupled receptor, rhodopsin-like; GPCR, rhodopsi…
FBtr0085100	3R_22871553_SNP	A	C	0.4417	72	91	1.69e-05	1.77e-05	0.788861	3R_22871553_SNP	C	SiteClass[FBgn0004842|RYa-R|INTRON|0],TranscriptAnnot[INTRON(MODIFIER||||464|RYa-R|protein_coding|CODING|FBtr0085100|4|1);INTRON(MODIFIER||||518|RYa-R|protein_coding|CODING|FBtr0345267|4|1);INTRON(MODIFIER||||467|RYa-R|protein_coding|CODING|FBtr0345268|4|1)]	-
FBtr0345267	3R_22871553_SNP	A	C	0.4417	72	91	1.69e-05	1.77e-05	0.788861	3R_22871553_SNP	C	SiteClass[FBgn0004842|RYa-R|INTRON|0],TranscriptAnnot[INTRON(MODIFIER||||464|RYa-R|protein_coding|CODING|FBtr0085100|4|1);INTRON(MODIFIER||||518|RYa-R|protein_coding|CODING|FBtr0345267|4|1);INTRON(MODIFIER||||467|RYa-R|protein_coding|CODING|FBtr0345268|4|1)]	-
FBtr0345268	3R_22871553_SNP	A	C	0.4417	72	91	1.69e-05	1.77e-05	0.788861	3R_22871553_SNP	C	SiteClass[FBgn0004842|RYa-R|INTRON|0],TranscriptAnnot[INTRON(MODIFIER||||464|RYa-R|protein_coding|CODING|FBtr0085100|4|1);INTRON(MODIFIER||||518|RYa-R|protein_coding|CODING|FBtr0345267|4|1);INTRON(MODIFIER||||467|RYa-R|protein_coding|CODING|FBtr0345268|4|1)]	-
FBgn0052187	3L_17798400_SNP	G	A	0.4734	80	89	2.9e-05	1.87e-05	0.798519	3L_17798400_SNP	G	SiteClass[FBgn0052187|CG32187|SYNONYMOUS_CODING|0;FBgn0036754|CG5589|UPSTREAM|585],TranscriptAnnot[SYNONYMOUS_CODING(LOW|SILENT|tcC/tcT|S290|409|CG32187|protein_coding|CODING|FBtr0075169|2|1);UPSTREAM(MODIFIER||585||594|CG5589|protein_coding|CODING|FBtr0075170||1)]	(TF_binding_site|mE1_TFBS_cad|FBsf0000245274);(TF_binding_site|mE1_TFBS_chinmo|FBsf0000210373)	FBgn0052187	This gene is referred to in FlyBase by the symbol Dmel\CG32187 (FBgn0052187). It is a protein_coding_gene from Drosophila melanogaster. It has one annotated transcript and one polypeptide. Gene sequence location is 3L:17804916..17806365. It has the cytological map location 75A2. Protein features are: Harbinger transposase-derived nuclease domain. Its molecular function is unknown. The biological …
FBgn0036754	3L_17798400_SNP	G	A	0.4734	80	89	2.9e-05	1.87e-05	0.798519	3L_17798400_SNP	G	SiteClass[FBgn0052187|CG32187|SYNONYMOUS_CODING|0;FBgn0036754|CG5589|UPSTREAM|585],TranscriptAnnot[SYNONYMOUS_CODING(LOW|SILENT|tcC/tcT|S290|409|CG32187|protein_coding|CODING|FBtr0075169|2|1);UPSTREAM(MODIFIER||585||594|CG5589|protein_coding|CODING|FBtr0075170||1)]	(TF_binding_site|mE1_TFBS_cad|FBsf0000245274);(TF_binding_site|mE1_TFBS_chinmo|FBsf0000210373)	FBgn0036754	This gene is referred to in FlyBase by the symbol Dmel\CG5589 (FBgn0036754). It is a protein_coding_gene from Drosophila melanogaster. It has one annotated transcript and one polypeptide. Gene sequence location is 3L:17802490..17804715. It has the cytological map location 75A2. Protein features are: ATP-dependent RNA helicase DEAD-box, conserved site; DEAD/DEAH box helicase domain; Helicase super…
FBtr0075169	3L_17798400_SNP	G	A	0.4734	80	89	2.9e-05	1.87e-05	0.798519	3L_17798400_SNP	G	SiteClass[FBgn0052187|CG32187|SYNONYMOUS_CODING|0;FBgn0036754|CG5589|UPSTREAM|585],TranscriptAnnot[SYNONYMOUS_CODING(LOW|SILENT|tcC/tcT|S290|409|CG32187|protein_coding|CODING|FBtr0075169|2|1);UPSTREAM(MODIFIER||585||594|CG5589|protein_coding|CODING|FBtr0075170||1)]	(TF_binding_site|mE1_TFBS_cad|FBsf0000245274);(TF_binding_site|mE1_TFBS_chinmo|FBsf0000210373)
FBtr0075170	3L_17798400_SNP	G	A	0.4734	80	89	2.9e-05	1.87e-05	0.798519	3L_17798400_SNP	G	SiteClass[FBgn0052187|CG32187|SYNONYMOUS_CODING|0;FBgn0036754|CG5589|UPSTREAM|585],TranscriptAnnot[SYNONYMOUS_CODING(LOW|SILENT|tcC/tcT|S290|409|CG32187|protein_coding|CODING|FBtr0075169|2|1);UPSTREAM(MODIFIER||585||594|CG5589|protein_coding|CODING|FBtr0075170||1)]	(TF_binding_site|mE1_TFBS_cad|FBsf0000245274);(TF_binding_site|mE1_TFBS_chinmo|FBsf0000210373)
FBgn0034786	2R_18741574_SNP	C	T	0.3218	56	118	2.1e-05	1.96e-05	0.798519	2R_18741574_SNP	C	SiteClass[FBgn0034786|CG13531|UPSTREAM|224;FBgn0010078|RpL23|UPSTREAM|332],TranscriptAnnot[UPSTREAM(MODIFIER||332||140|RpL23|protein_coding|CODING|FBtr0071897||1);UPSTREAM(MODIFIER||323||1815|CG13531|protein_coding|CODING|FBtr0071910||1);UPSTREAM(MODIFIER||224||1815|CG13531|protein_coding|CODING|FBtr0343182||1);INTERGENIC(MODIFIER||||||||||1)]	(TF_binding_site|BDTNP1_TFBS_dl|FBsf0000303993);(TF_binding_site|BDTNP1_TFBS_twi|FBsf0000200185);(TF_binding_site|mE1_TFBS_bab1|FBsf0000214339);(TF_binding_site|mE1_TFBS_HSA|FBsf0000359570);(TF_binding_site|mE1_TFBS_HSA|FBsf0000359571)	FBgn0034786	This gene is referred to in FlyBase by the symbol Dmel\CG13531 (FBgn0034786). It is a protein_coding_gene from Drosophila melanogaster. It has 2 annotated transcripts and 2 polypeptides (1 unique). Gene sequence location is 2R:22847832..22853827. It has the cytological map location 59B2-59B3. Protein features are: Spatacsin; Spatacsin, C-terminal domain. Its molecular function is described by: . …
FBgn0010078	2R_18741574_SNP	C	T	0.3218	56	118	2.1e-05	1.96e-05	0.798519	2R_18741574_SNP	C	SiteClass[FBgn0034786|CG13531|UPSTREAM|224;FBgn0010078|RpL23|UPSTREAM|332],TranscriptAnnot[UPSTREAM(MODIFIER||332||140|RpL23|protein_coding|CODING|FBtr0071897||1);UPSTREAM(MODIFIER||323||1815|CG13531|protein_coding|CODING|FBtr0071910||1);UPSTREAM(MODIFIER||224||1815|CG13531|protein_coding|CODING|FBtr0343182||1);INTERGENIC(MODIFIER||||||||||1)]	(TF_binding_site|BDTNP1_TFBS_dl|FBsf0000303993);(TF_binding_site|BDTNP1_TFBS_twi|FBsf0000200185);(TF_binding_site|mE1_TFBS_bab1|FBsf0000214339);(TF_binding_site|mE1_TFBS_HSA|FBsf0000359570);(TF_binding_site|mE1_TFBS_HSA|FBsf0000359571)	FBgn0010078	The gene Ribosomal protein L23 is referred to in FlyBase by the symbol Dmel\RpL23 (CG3661, FBgn0010078). It is a protein_coding_gene from Drosophila melanogaster. It has one annotated transcript and one polypeptide. Gene sequence location is 2R:22854383..22855694. It has the cytological map location 59B3. Protein features are: Ribosomal protein L14 conserved site; Ribosomal protein L14 domain; Ri…
FBtr0071897	2R_18741574_SNP	C	T	0.3218	56	118	2.1e-05	1.96e-05	0.798519	2R_18741574_SNP	C	SiteClass[FBgn0034786|CG13531|UPSTREAM|224;FBgn0010078|RpL23|UPSTREAM|332],TranscriptAnnot[UPSTREAM(MODIFIER||332||140|RpL23|protein_coding|CODING|FBtr0071897||1);UPSTREAM(MODIFIER||323||1815|CG13531|protein_coding|CODING|FBtr0071910||1);UPSTREAM(MODIFIER||224||1815|CG13531|protein_coding|CODING|FBtr0343182||1);INTERGENIC(MODIFIER||||||||||1)]	(TF_binding_site|BDTNP1_TFBS_dl|FBsf0000303993);(TF_binding_site|BDTNP1_TFBS_twi|FBsf0000200185);(TF_binding_site|mE1_TFBS_bab1|FBsf0000214339);(TF_binding_site|mE1_TFBS_HSA|FBsf0000359570);(TF_binding_site|mE1_TFBS_HSA|FBsf0000359571)
FBtr0071910	2R_18741574_SNP	C	T	0.3218	56	118	2.1e-05	1.96e-05	0.798519	2R_18741574_SNP	C	SiteClass[FBgn0034786|CG13531|UPSTREAM|224;FBgn0010078|RpL23|UPSTREAM|332],TranscriptAnnot[UPSTREAM(MODIFIER||332||140|RpL23|protein_coding|CODING|FBtr0071897||1);UPSTREAM(MODIFIER||323||1815|CG13531|protein_coding|CODING|FBtr0071910||1);UPSTREAM(MODIFIER||224||1815|CG13531|protein_coding|CODING|FBtr0343182||1);INTERGENIC(MODIFIER||||||||||1)]	(TF_binding_site|BDTNP1_TFBS_dl|FBsf0000303993);(TF_binding_site|BDTNP1_TFBS_twi|FBsf0000200185);(TF_binding_site|mE1_TFBS_bab1|FBsf0000214339);(TF_binding_site|mE1_TFBS_HSA|FBsf0000359570);(TF_binding_site|mE1_TFBS_HSA|FBsf0000359571)
FBtr0343182	2R_18741574_SNP	C	T	0.3218	56	118	2.1e-05	1.96e-05	0.798519	2R_18741574_SNP	C	SiteClass[FBgn0034786|CG13531|UPSTREAM|224;FBgn0010078|RpL23|UPSTREAM|332],TranscriptAnnot[UPSTREAM(MODIFIER||332||140|RpL23|protein_coding|CODING|FBtr0071897||1);UPSTREAM(MODIFIER||323||1815|CG13531|protein_coding|CODING|FBtr0071910||1);UPSTREAM(MODIFIER||224||1815|CG13531|protein_coding|CODING|FBtr0343182||1);INTERGENIC(MODIFIER||||||||||1)]	(TF_binding_site|BDTNP1_TFBS_dl|FBsf0000303993);(TF_binding_site|BDTNP1_TFBS_twi|FBsf0000200185);(TF_binding_site|mE1_TFBS_bab1|FBsf0000214339);(TF_binding_site|mE1_TFBS_HSA|FBsf0000359570);(TF_binding_site|mE1_TFBS_HSA|FBsf0000359571)
FBgn0043854	2L_6372563_SNP	T	C	0.117	20	151	2.39e-05	2e-05	0.798519	2L_6372563_SNP	C	SiteClass[FBgn0043854|slam|UPSTREAM|952],TranscriptAnnot[UTR_5_PRIME(MODIFIER||1014||1173|slam|protein_coding|CODING|FBtr0290281|1|1);UPSTREAM(MODIFIER||952||1173|slam|protein_coding|CODING|FBtr0344864||1)]	(TF_binding_site|BDTNP1_TFBS_bcd|FBsf0000333637);(TF_binding_site|BDTNP1_TFBS_dl|FBsf0000297023);(TF_binding_site|BDTNP1_TFBS_gt|FBsf0000293073);(TF_binding_site|BDTNP1_TFBS_twi|FBsf0000201018);(TF_binding_site|mE1_TFBS_cad|FBsf0000241513)	FBgn0043854	The gene slow as molasses is referred to in FlyBase by the symbol Dmel\slam (CG9506, FBgn0043854). It is a protein_coding_gene from Drosophila melanogaster. It has 2 annotated transcripts and 2 polypeptides (1 unique). Gene sequence location is 2L:6372388..6377284. It has the cytological map location 26C4. Its molecular function is unknown. It is involved in the biological process described with:…
FBtr0290281	2L_6372563_SNP	T	C	0.117	20	151	2.39e-05	2e-05	0.798519	2L_6372563_SNP	C	SiteClass[FBgn0043854|slam|UPSTREAM|952],TranscriptAnnot[UTR_5_PRIME(MODIFIER||1014||1173|slam|protein_coding|CODING|FBtr0290281|1|1);UPSTREAM(MODIFIER||952||1173|slam|protein_coding|CODING|FBtr0344864||1)]	(TF_binding_site|BDTNP1_TFBS_bcd|FBsf0000333637);(TF_binding_site|BDTNP1_TFBS_dl|FBsf0000297023);(TF_binding_site|BDTNP1_TFBS_gt|FBsf0000293073);(TF_binding_site|BDTNP1_TFBS_twi|FBsf0000201018);(TF_binding_site|mE1_TFBS_cad|FBsf0000241513)
FBtr0344864	2L_6372563_SNP	T	C	0.117	20	151	2.39e-05	2e-05	0.798519	2L_6372563_SNP	C	SiteClass[FBgn0043854|slam|UPSTREAM|952],TranscriptAnnot[UTR_5_PRIME(MODIFIER||1014||1173|slam|protein_coding|CODING|FBtr0290281|1|1);UPSTREAM(MODIFIER||952||1173|slam|protein_coding|CODING|FBtr0344864||1)]	(TF_binding_site|BDTNP1_TFBS_bcd|FBsf0000333637);(TF_binding_site|BDTNP1_TFBS_dl|FBsf0000297023);(TF_binding_site|BDTNP1_TFBS_gt|FBsf0000293073);(TF_binding_site|BDTNP1_TFBS_twi|FBsf0000201018);(TF_binding_site|mE1_TFBS_cad|FBsf0000241513)
FBgn0266429	X_3481067_INS	TCA	T	0.1795	28	128	2.44e-05	2.04e-05	0.798519	X_3481067_INS	T	SiteClass[FBgn0266429|AstA-R1|INTRON|0],TranscriptAnnot[INTRON(MODIFIER||||394|AstA-R1|protein_coding|CODING|FBtr0070575|1|1);INTRON(MODIFIER||||394|AstA-R1|protein_coding|CODING|FBtr0333798|1|1)]	-	FBgn0266429	The gene Allatostatin A receptor 1 is referred to in FlyBase by the symbol Dmel\AstA-R1 (CG2872, FBgn0266429). It is a protein_coding_gene from Drosophila melanogaster. It has 2 annotated transcripts and 2 polypeptides (1 unique). Gene sequence location is X:3574536..3666724. It has the cytological map location 3D6-3E2. Protein features are: G protein-coupled receptor, rhodopsin-like; GPCR, rhodo…
FBtr0070575	X_3481067_INS	TCA	T	0.1795	28	128	2.44e-05	2.04e-05	0.798519	X_3481067_INS	T	SiteClass[FBgn0266429|AstA-R1|INTRON|0],TranscriptAnnot[INTRON(MODIFIER||||394|AstA-R1|protein_coding|CODING|FBtr0070575|1|1);INTRON(MODIFIER||||394|AstA-R1|protein_coding|CODING|FBtr0333798|1|1)]	-
FBtr0333798	X_3481067_INS	TCA	T	0.1795	28	128	2.44e-05	2.04e-05	0.798519	X_3481067_INS	T	SiteClass[FBgn0266429|AstA-R1|INTRON|0],TranscriptAnnot[INTRON(MODIFIER||||394|AstA-R1|protein_coding|CODING|FBtr0070575|1|1);INTRON(MODIFIER||||394|AstA-R1|protein_coding|CODING|FBtr0333798|1|1)]	-
FBgn0266429	X_3480873_SNP	G	A	0.183	28	125	2.91e-05	2.06e-05	0.798519	X_3480873_SNP	A	SiteClass[FBgn0266429|AstA-R1|INTRON|0],TranscriptAnnot[INTRON(MODIFIER||||394|AstA-R1|protein_coding|CODING|FBtr0070575|1|1);INTRON(MODIFIER||||394|AstA-R1|protein_coding|CODING|FBtr0333798|1|1)]	-	FBgn0266429	The gene Allatostatin A receptor 1 is referred to in FlyBase by the symbol Dmel\AstA-R1 (CG2872, FBgn0266429). It is a protein_coding_gene from Drosophila melanogaster. It has 2 annotated transcripts and 2 polypeptides (1 unique). Gene sequence location is X:3574536..3666724. It has the cytological map location 3D6-3E2. Protein features are: G protein-coupled receptor, rhodopsin-like; GPCR, rhodo…
FBtr0070575	X_3480873_SNP	G	A	0.183	28	125	2.91e-05	2.06e-05	0.798519	X_3480873_SNP	A	SiteClass[FBgn0266429|AstA-R1|INTRON|0],TranscriptAnnot[INTRON(MODIFIER||||394|AstA-R1|protein_coding|CODING|FBtr0070575|1|1);INTRON(MODIFIER||||394|AstA-R1|protein_coding|CODING|FBtr0333798|1|1)]	-
FBtr0333798	X_3480873_SNP	G	A	0.183	28	125	2.91e-05	2.06e-05	0.798519	X_3480873_SNP	A	SiteClass[FBgn0266429|AstA-R1|INTRON|0],TranscriptAnnot[INTRON(MODIFIER||||394|AstA-R1|protein_coding|CODING|FBtr0070575|1|1);INTRON(MODIFIER||||394|AstA-R1|protein_coding|CODING|FBtr0333798|1|1)]	-
FBgn0031619	2L_4651421_SNP	A	G	0.2407	39	123	4.06e-05	2.12e-05	0.798519	2L_4651421_SNP	G	SiteClass[FBgn0031619|CG3355|UPSTREAM|34],TranscriptAnnot[UTR_5_PRIME(MODIFIER||69||216|CG3355|protein_coding|CODING|FBtr0100560|1|1);UPSTREAM(MODIFIER||34||314|CG3355|protein_coding|CODING|FBtr0077376||1)]	-	FBgn0031619	This gene is referred to in FlyBase by the symbol Dmel\CG3355 (FBgn0031619). It is a protein_coding_gene from Drosophila melanogaster. It has 2 annotated transcripts and 2 polypeptides (all unique). Gene sequence location is 2L:4651403..4652892. It has the cytological map location 25A2. Protein features are: Peptidase S1, PA clan; Peptidase S1, trypsin family, active site; Peptidase S1A, chymotry…
FBtr0100560	2L_4651421_SNP	A	G	0.2407	39	123	4.06e-05	2.12e-05	0.798519	2L_4651421_SNP	G	SiteClass[FBgn0031619|CG3355|UPSTREAM|34],TranscriptAnnot[UTR_5_PRIME(MODIFIER||69||216|CG3355|protein_coding|CODING|FBtr0100560|1|1);UPSTREAM(MODIFIER||34||314|CG3355|protein_coding|CODING|FBtr0077376||1)]	-
FBtr0077376	2L_4651421_SNP	A	G	0.2407	39	123	4.06e-05	2.12e-05	0.798519	2L_4651421_SNP	G	SiteClass[FBgn0031619|CG3355|UPSTREAM|34],TranscriptAnnot[UTR_5_PRIME(MODIFIER||69||216|CG3355|protein_coding|CODING|FBtr0100560|1|1);UPSTREAM(MODIFIER||34||314|CG3355|protein_coding|CODING|FBtr0077376||1)]	-
FBgn0028740	2R_13658081_SNP	G	T	0.2529	43	127	2.85e-05	2.13e-05	0.798519	2R_13658081_SNP	G	SiteClass[FBgn0028740|CG6362|SYNONYMOUS_CODING|0;FBgn0034279|CG18635|UPSTREAM|587],TranscriptAnnot[SYNONYMOUS_CODING(LOW|SILENT|gcC/gcA|A568|624|CG6362|protein_coding|CODING|FBtr0089556|3|1);UPSTREAM(MODIFIER||587||649|CG18635|protein_coding|CODING|FBtr0089557||1)]	(TF_binding_site|mE1_TFBS_cad|FBsf0000246900);(TF_binding_site|mE1_TFBS_chinmo|FBsf0000211494);(TF_binding_site|mE1_TFBS_HSA|FBsf0000357867)	FBgn0028740	This	gene	is	referred	to	in	FlyBase	by	the	symbol	Dmel\CG6362	(FBgn0028740).	It	is	a	protein_coding_gene	from	Drosophila	melanogaster.	It	has	one	annotated	transcript	and	one	polypeptide.	Gene	sequence	location	is	2R:17770405..17772552.	It	has	the
FBgn0034279	2R_13658081_SNP	G	T	0.2529	43	127	2.85e-05	2.13e-05	0.798519	2R_13658081_SNP	G	SiteClass[FBgn0028740|CG6362|SYNONYMOUS_CODING|0;FBgn0034279|CG18635|UPSTREAM|587],TranscriptAnnot[SYNONYMOUS_CODING(LOW|SILENT|gcC/gcA|A568|624|CG6362|protein_coding|CODING|FBtr0089556|3|1);UPSTREAM(MODIFIER||587||649|CG18635|protein_coding|CODING|FBtr0089557||1)]	(TF_binding_site|mE1_TFBS_cad|FBsf0000246900);(TF_binding_site|mE1_TFBS_chinmo|FBsf0000211494);(TF_binding_site|mE1_TFBS_HSA|FBsf0000357867)	FBgn0034279	This	gene	is	referred	to	in	FlyBase	by	the	symbol	Dmel\CG18635	(FBgn0034279).	It	is	a	protein_coding_gene	from	Drosophila	melanogaster.	It	has	one	annotated	transcript	and	one	polypeptide.	Gene	sequence	location	is	2R:17767808..17769989.	It	has	the
FBtr0089556	2R_13658081_SNP	G	T	0.2529	43	127	2.85e-05	2.13e-05	0.798519	2R_13658081_SNP	G	SiteClass[FBgn0028740|CG6362|SYNONYMOUS_CODING|0;FBgn0034279|CG18635|UPSTREAM|587],TranscriptAnnot[SYNONYMOUS_CODING(LOW|SILENT|gcC/gcA|A568|624|CG6362|protein_coding|CODING|FBtr0089556|3|1);UPSTREAM(MODIFIER||587||649|CG18635|protein_coding|CODING|FBtr0089557||1)]	(TF_binding_site|mE1_TFBS_cad|FBsf0000246900);(TF_binding_site|mE1_TFBS_chinmo|FBsf0000211494);(TF_binding_site|mE1_TFBS_HSA|FBsf0000357867)
FBtr0089557	2R_13658081_SNP	G	T	0.2529	43	127	2.85e-05	2.13e-05	0.798519	2R_13658081_SNP	G	SiteClass[FBgn0028740|CG6362|SYNONYMOUS_CODING|0;FBgn0034279|CG18635|UPSTREAM|587],TranscriptAnnot[SYNONYMOUS_CODING(LOW|SILENT|gcC/gcA|A568|624|CG6362|protein_coding|CODING|FBtr0089556|3|1);UPSTREAM(MODIFIER||587||649|CG18635|protein_coding|CODING|FBtr0089557||1)]	(TF_binding_site|mE1_TFBS_cad|FBsf0000246900);(TF_binding_site|mE1_TFBS_chinmo|FBsf0000211494);(TF_binding_site|mE1_TFBS_HSA|FBsf0000357867)
FBgn0264908	3L_15869118_SNP	G	A	0.05917	10	159	2.54e-05	2.36e-05	0.79905	3L_15869118_SNP	A	SiteClass[FBgn0264908|pHCl|INTRON|0;FBgn0264843|CR44051|DOWNSTREAM|73],TranscriptAnnot[DOWNSTREAM(MODIFIER||73|||CR44051|ncRNA|NON_CODING|FBtr0334745||1);INTRON(MODIFIER||||754|pHCl|protein_coding|CODING|FBtr0334970|3|1);INTRON(MODIFIER||||762|pHCl|protein_coding|CODING|FBtr0334971|3|1);INTRON(MODIFIER||||637|pHCl|protein_coding|CODING|FBtr0334972|3|1);INTRON(MODIFIER||||737|pHCl|protein_coding|C…	-	FBgn0264908	This gene is referred to in FlyBase by the symbol Dmel\pHCl (CG44099, FBgn0264908). It is a protein_coding_gene from Drosophila melanogaster. It has 16 annotated transcripts and 16 polypeptides (all unique). Gene sequence location is 3L:15848578..15899029. It has the cytological map location 72A2. Protein features are: Gamma-aminobutyric acid A receptor/Glycine receptor alpha; Neurotransmitter-ga…
FBgn0264843	3L_15869118_SNP	G	A	0.05917	10	159	2.54e-05	2.36e-05	0.79905	3L_15869118_SNP	A	SiteClass[FBgn0264908|pHCl|INTRON|0;FBgn0264843|CR44051|DOWNSTREAM|73],TranscriptAnnot[DOWNSTREAM(MODIFIER||73|||CR44051|ncRNA|NON_CODING|FBtr0334745||1);INTRON(MODIFIER||||754|pHCl|protein_coding|CODING|FBtr0334970|3|1);INTRON(MODIFIER||||762|pHCl|protein_coding|CODING|FBtr0334971|3|1);INTRON(MODIFIER||||637|pHCl|protein_coding|CODING|FBtr0334972|3|1);INTRON(MODIFIER||||737|pHCl|protein_coding|C…	-	FBgn0264843	This	gene	is	referred	to	in	FlyBase	by	the	symbol	Dmel\CR44051	(FBgn0264843).	It	is	a	non_protein_coding_gene	from	Drosophila	melanogaster.	It	has	one	annotated	transcript.	Gene	sequence	location	is	3L:15876091..15876472.	It	has	the	cytological	map	location
FBtr0334745	3L_15869118_SNP	G	A	0.05917	10	159	2.54e-05	2.36e-05	0.79905	3L_15869118_SNP	A	SiteClass[FBgn0264908|pHCl|INTRON|0;FBgn0264843|CR44051|DOWNSTREAM|73],TranscriptAnnot[DOWNSTREAM(MODIFIER||73|||CR44051|ncRNA|NON_CODING|FBtr0334745||1);INTRON(MODIFIER||||754|pHCl|protein_coding|CODING|FBtr0334970|3|1);INTRON(MODIFIER||||762|pHCl|protein_coding|CODING|FBtr0334971|3|1);INTRON(MODIFIER||||637|pHCl|protein_coding|CODING|FBtr0334972|3|1);INTRON(MODIFIER||||737|pHCl|protein_coding|C…	-
FBtr0334970	3L_15869118_SNP	G	A	0.05917	10	159	2.54e-05	2.36e-05	0.79905	3L_15869118_SNP	A	SiteClass[FBgn0264908|pHCl|INTRON|0;FBgn0264843|CR44051|DOWNSTREAM|73],TranscriptAnnot[DOWNSTREAM(MODIFIER||73|||CR44051|ncRNA|NON_CODING|FBtr0334745||1);INTRON(MODIFIER||||754|pHCl|protein_coding|CODING|FBtr0334970|3|1);INTRON(MODIFIER||||762|pHCl|protein_coding|CODING|FBtr0334971|3|1);INTRON(MODIFIER||||637|pHCl|protein_coding|CODING|FBtr0334972|3|1);INTRON(MODIFIER||||737|pHCl|protein_coding|C…	-
FBtr0334971	3L_15869118_SNP	G	A	0.05917	10	159	2.54e-05	2.36e-05	0.79905	3L_15869118_SNP	A	SiteClass[FBgn0264908|pHCl|INTRON|0;FBgn0264843|CR44051|DOWNSTREAM|73],TranscriptAnnot[DOWNSTREAM(MODIFIER||73|||CR44051|ncRNA|NON_CODING|FBtr0334745||1);INTRON(MODIFIER||||754|pHCl|protein_coding|CODING|FBtr0334970|3|1);INTRON(MODIFIER||||762|pHCl|protein_coding|CODING|FBtr0334971|3|1);INTRON(MODIFIER||||637|pHCl|protein_coding|CODING|FBtr0334972|3|1);INTRON(MODIFIER||||737|pHCl|protein_coding|C…	-
FBtr0334972	3L_15869118_SNP	G	A	0.05917	10	159	2.54e-05	2.36e-05	0.79905	3L_15869118_SNP	A	SiteClass[FBgn0264908|pHCl|INTRON|0;FBgn0264843|CR44051|DOWNSTREAM|73],TranscriptAnnot[DOWNSTREAM(MODIFIER||73|||CR44051|ncRNA|NON_CODING|FBtr0334745||1);INTRON(MODIFIER||||754|pHCl|protein_coding|CODING|FBtr0334970|3|1);INTRON(MODIFIER||||762|pHCl|protein_coding|CODING|FBtr0334971|3|1);INTRON(MODIFIER||||637|pHCl|protein_coding|CODING|FBtr0334972|3|1);INTRON(MODIFIER||||737|pHCl|protein_coding|C…	-
FBtr0334973	3L_15869118_SNP	G	A	0.05917	10	159	2.54e-05	2.36e-05	0.79905	3L_15869118_SNP	A	SiteClass[FBgn0264908|pHCl|INTRON|0;FBgn0264843|CR44051|DOWNSTREAM|73],TranscriptAnnot[DOWNSTREAM(MODIFIER||73|||CR44051|ncRNA|NON_CODING|FBtr0334745||1);INTRON(MODIFIER||||754|pHCl|protein_coding|CODING|FBtr0334970|3|1);INTRON(MODIFIER||||762|pHCl|protein_coding|CODING|FBtr0334971|3|1);INTRON(MODIFIER||||637|pHCl|protein_coding|CODING|FBtr0334972|3|1);INTRON(MODIFIER||||737|pHCl|protein_coding|C…	-
FBtr0334974	3L_15869118_SNP	G	A	0.05917	10	159	2.54e-05	2.36e-05	0.79905	3L_15869118_SNP	A	SiteClass[FBgn0264908|pHCl|INTRON|0;FBgn0264843|CR44051|DOWNSTREAM|73],TranscriptAnnot[DOWNSTREAM(MODIFIER||73|||CR44051|ncRNA|NON_CODING|FBtr0334745||1);INTRON(MODIFIER||||754|pHCl|protein_coding|CODING|FBtr0334970|3|1);INTRON(MODIFIER||||762|pHCl|protein_coding|CODING|FBtr0334971|3|1);INTRON(MODIFIER||||637|pHCl|protein_coding|CODING|FBtr0334972|3|1);INTRON(MODIFIER||||737|pHCl|protein_coding|C…	-
FBtr0334975	3L_15869118_SNP	G	A	0.05917	10	159	2.54e-05	2.36e-05	0.79905	3L_15869118_SNP	A	SiteClass[FBgn0264908|pHCl|INTRON|0;FBgn0264843|CR44051|DOWNSTREAM|73],TranscriptAnnot[DOWNSTREAM(MODIFIER||73|||CR44051|ncRNA|NON_CODING|FBtr0334745||1);INTRON(MODIFIER||||754|pHCl|protein_coding|CODING|FBtr0334970|3|1);INTRON(MODIFIER||||762|pHCl|protein_coding|CODING|FBtr0334971|3|1);INTRON(MODIFIER||||637|pHCl|protein_coding|CODING|FBtr0334972|3|1);INTRON(MODIFIER||||737|pHCl|protein_coding|C…	-
FBtr0334976	3L_15869118_SNP	G	A	0.05917	10	159	2.54e-05	2.36e-05	0.79905	3L_15869118_SNP	A	SiteClass[FBgn0264908|pHCl|INTRON|0;FBgn0264843|CR44051|DOWNSTREAM|73],TranscriptAnnot[DOWNSTREAM(MODIFIER||73|||CR44051|ncRNA|NON_CODING|FBtr0334745||1);INTRON(MODIFIER||||754|pHCl|protein_coding|CODING|FBtr0334970|3|1);INTRON(MODIFIER||||762|pHCl|protein_coding|CODING|FBtr0334971|3|1);INTRON(MODIFIER||||637|pHCl|protein_coding|CODING|FBtr0334972|3|1);INTRON(MODIFIER||||737|pHCl|protein_coding|C…	-
FBtr0334977	3L_15869118_SNP	G	A	0.05917	10	159	2.54e-05	2.36e-05	0.79905	3L_15869118_SNP	A	SiteClass[FBgn0264908|pHCl|INTRON|0;FBgn0264843|CR44051|DOWNSTREAM|73],TranscriptAnnot[DOWNSTREAM(MODIFIER||73|||CR44051|ncRNA|NON_CODING|FBtr0334745||1);INTRON(MODIFIER||||754|pHCl|protein_coding|CODING|FBtr0334970|3|1);INTRON(MODIFIER||||762|pHCl|protein_coding|CODING|FBtr0334971|3|1);INTRON(MODIFIER||||637|pHCl|protein_coding|CODING|FBtr0334972|3|1);INTRON(MODIFIER||||737|pHCl|protein_coding|C…	-
FBtr0334978	3L_15869118_SNP	G	A	0.05917	10	159	2.54e-05	2.36e-05	0.79905	3L_15869118_SNP	A	SiteClass[FBgn0264908|pHCl|INTRON|0;FBgn0264843|CR44051|DOWNSTREAM|73],TranscriptAnnot[DOWNSTREAM(MODIFIER||73|||CR44051|ncRNA|NON_CODING|FBtr0334745||1);INTRON(MODIFIER||||754|pHCl|protein_coding|CODING|FBtr0334970|3|1);INTRON(MODIFIER||||762|pHCl|protein_coding|CODING|FBtr0334971|3|1);INTRON(MODIFIER||||637|pHCl|protein_coding|CODING|FBtr0334972|3|1);INTRON(MODIFIER||||737|pHCl|protein_coding|C…	-
FBtr0334979	3L_15869118_SNP	G	A	0.05917	10	159	2.54e-05	2.36e-05	0.79905	3L_15869118_SNP	A	SiteClass[FBgn0264908|pHCl|INTRON|0;FBgn0264843|CR44051|DOWNSTREAM|73],TranscriptAnnot[DOWNSTREAM(MODIFIER||73|||CR44051|ncRNA|NON_CODING|FBtr0334745||1);INTRON(MODIFIER||||754|pHCl|protein_coding|CODING|FBtr0334970|3|1);INTRON(MODIFIER||||762|pHCl|protein_coding|CODING|FBtr0334971|3|1);INTRON(MODIFIER||||637|pHCl|protein_coding|CODING|FBtr0334972|3|1);INTRON(MODIFIER||||737|pHCl|protein_coding|C…	-
FBtr0334980	3L_15869118_SNP	G	A	0.05917	10	159	2.54e-05	2.36e-05	0.79905	3L_15869118_SNP	A	SiteClass[FBgn0264908|pHCl|INTRON|0;FBgn0264843|CR44051|DOWNSTREAM|73],TranscriptAnnot[DOWNSTREAM(MODIFIER||73|||CR44051|ncRNA|NON_CODING|FBtr0334745||1);INTRON(MODIFIER||||754|pHCl|protein_coding|CODING|FBtr0334970|3|1);INTRON(MODIFIER||||762|pHCl|protein_coding|CODING|FBtr0334971|3|1);INTRON(MODIFIER||||637|pHCl|protein_coding|CODING|FBtr0334972|3|1);INTRON(MODIFIER||||737|pHCl|protein_coding|C…	-
FBtr0334981	3L_15869118_SNP	G	A	0.05917	10	159	2.54e-05	2.36e-05	0.79905	3L_15869118_SNP	A	SiteClass[FBgn0264908|pHCl|INTRON|0;FBgn0264843|CR44051|DOWNSTREAM|73],TranscriptAnnot[DOWNSTREAM(MODIFIER||73|||CR44051|ncRNA|NON_CODING|FBtr0334745||1);INTRON(MODIFIER||||754|pHCl|protein_coding|CODING|FBtr0334970|3|1);INTRON(MODIFIER||||762|pHCl|protein_coding|CODING|FBtr0334971|3|1);INTRON(MODIFIER||||637|pHCl|protein_coding|CODING|FBtr0334972|3|1);INTRON(MODIFIER||||737|pHCl|protein_coding|C…	-
FBtr0334982	3L_15869118_SNP	G	A	0.05917	10	159	2.54e-05	2.36e-05	0.79905	3L_15869118_SNP	A	SiteClass[FBgn0264908|pHCl|INTRON|0;FBgn0264843|CR44051|DOWNSTREAM|73],TranscriptAnnot[DOWNSTREAM(MODIFIER||73|||CR44051|ncRNA|NON_CODING|FBtr0334745||1);INTRON(MODIFIER||||754|pHCl|protein_coding|CODING|FBtr0334970|3|1);INTRON(MODIFIER||||762|pHCl|protein_coding|CODING|FBtr0334971|3|1);INTRON(MODIFIER||||637|pHCl|protein_coding|CODING|FBtr0334972|3|1);INTRON(MODIFIER||||737|pHCl|protein_coding|C…	-
FBtr0334983	3L_15869118_SNP	G	A	0.05917	10	159	2.54e-05	2.36e-05	0.79905	3L_15869118_SNP	A	SiteClass[FBgn0264908|pHCl|INTRON|0;FBgn0264843|CR44051|DOWNSTREAM|73],TranscriptAnnot[DOWNSTREAM(MODIFIER||73|||CR44051|ncRNA|NON_CODING|FBtr0334745||1);INTRON(MODIFIER||||754|pHCl|protein_coding|CODING|FBtr0334970|3|1);INTRON(MODIFIER||||762|pHCl|protein_coding|CODING|FBtr0334971|3|1);INTRON(MODIFIER||||637|pHCl|protein_coding|CODING|FBtr0334972|3|1);INTRON(MODIFIER||||737|pHCl|protein_coding|C…	-
FBtr0343800	3L_15869118_SNP	G	A	0.05917	10	159	2.54e-05	2.36e-05	0.79905	3L_15869118_SNP	A	SiteClass[FBgn0264908|pHCl|INTRON|0;FBgn0264843|CR44051|DOWNSTREAM|73],TranscriptAnnot[DOWNSTREAM(MODIFIER||73|||CR44051|ncRNA|NON_CODING|FBtr0334745||1);INTRON(MODIFIER||||754|pHCl|protein_coding|CODING|FBtr0334970|3|1);INTRON(MODIFIER||||762|pHCl|protein_coding|CODING|FBtr0334971|3|1);INTRON(MODIFIER||||637|pHCl|protein_coding|CODING|FBtr0334972|3|1);INTRON(MODIFIER||||737|pHCl|protein_coding|C…	-
FBtr0343801	3L_15869118_SNP	G	A	0.05917	10	159	2.54e-05	2.36e-05	0.79905	3L_15869118_SNP	A	SiteClass[FBgn0264908|pHCl|INTRON|0;FBgn0264843|CR44051|DOWNSTREAM|73],TranscriptAnnot[DOWNSTREAM(MODIFIER||73|||CR44051|ncRNA|NON_CODING|FBtr0334745||1);INTRON(MODIFIER||||754|pHCl|protein_coding|CODING|FBtr0334970|3|1);INTRON(MODIFIER||||762|pHCl|protein_coding|CODING|FBtr0334971|3|1);INTRON(MODIFIER||||637|pHCl|protein_coding|CODING|FBtr0334972|3|1);INTRON(MODIFIER||||737|pHCl|protein_coding|C…	-
FBgn0031078	X_19752469_SNP	A	C	0.3237	56	117	3.25e-05	2.39e-05	0.79905	X_19752469_SNP	C	SiteClass[FBgn0031078|Nup205|SYNONYMOUS_CODING|0],TranscriptAnnot[SYNONYMOUS_CODING(LOW|SILENT|ccC/ccA|P1827|2067|Nup205|protein_coding|CODING|FBtr0074799|9|1);SYNONYMOUS_CODING(LOW|SILENT|ccC/ccA|P1850|2090|Nup205|protein_coding|CODING|FBtr0074798|8|1)]	(TF_binding_site|mE1_TFBS_cad|FBsf0000243758);(TF_binding_site|mE1_TFBS_chinmo|FBsf0000209290);(TF_binding_site|mE1_TFBS_HSA|FBsf0000349767);(TF_binding_site|mE1_TFBS_sens|FBsf0000221835)	FBgn0031078	The gene Nucleoporin 205kD is referred to in FlyBase by the symbol Dmel\Nup205 (CG11943, FBgn0031078). It is a protein_coding_gene from Drosophila melanogaster. It has 2 annotated transcripts and 2 polypeptides (all unique). Gene sequence location is X:19852214..19859379. It has the cytological map location 18F4. Protein features are: Nucleoporin Nup186/Nup192/Nup205. Its molecular function is de…
FBtr0074799	X_19752469_SNP	A	C	0.3237	56	117	3.25e-05	2.39e-05	0.79905	X_19752469_SNP	C	SiteClass[FBgn0031078|Nup205|SYNONYMOUS_CODING|0],TranscriptAnnot[SYNONYMOUS_CODING(LOW|SILENT|ccC/ccA|P1827|2067|Nup205|protein_coding|CODING|FBtr0074799|9|1);SYNONYMOUS_CODING(LOW|SILENT|ccC/ccA|P1850|2090|Nup205|protein_coding|CODING|FBtr0074798|8|1)]	(TF_binding_site|mE1_TFBS_cad|FBsf0000243758);(TF_binding_site|mE1_TFBS_chinmo|FBsf0000209290);(TF_binding_site|mE1_TFBS_HSA|FBsf0000349767);(TF_binding_site|mE1_TFBS_sens|FBsf0000221835)
FBtr0074798	X_19752469_SNP	A	C	0.3237	56	117	3.25e-05	2.39e-05	0.79905	X_19752469_SNP	C	SiteClass[FBgn0031078|Nup205|SYNONYMOUS_CODING|0],TranscriptAnnot[SYNONYMOUS_CODING(LOW|SILENT|ccC/ccA|P1827|2067|Nup205|protein_coding|CODING|FBtr0074799|9|1);SYNONYMOUS_CODING(LOW|SILENT|ccC/ccA|P1850|2090|Nup205|protein_coding|CODING|FBtr0074798|8|1)]	(TF_binding_site|mE1_TFBS_cad|FBsf0000243758);(TF_binding_site|mE1_TFBS_chinmo|FBsf0000209290);(TF_binding_site|mE1_TFBS_HSA|FBsf0000349767);(TF_binding_site|mE1_TFBS_sens|FBsf0000221835)
FBgn0003502	2L_8267233_SNP	T	A	0.3688	59	101	2.64e-05	2.42e-05	0.79905	2L_8267233_SNP	A	SiteClass[FBgn0003502|Btk29A|INTRON|0],TranscriptAnnot[INTRON(MODIFIER||||603|Btk29A|protein_coding|CODING|FBtr0079615|2|1);INTRON(MODIFIER||||603|Btk29A|protein_coding|CODING|FBtr0079618|2|1);INTRON(MODIFIER||||603|Btk29A|protein_coding|CODING|FBtr0112835|1|1);INTRON(MODIFIER||||786|Btk29A|protein_coding|CODING|FBtr0079616|5|1);INTRON(MODIFIER||||786|Btk29A|protein_coding|CODING|FBtr0079617|5|1)…	(TF_binding_site|BDTNP1_TFBS_da|FBsf0000321905);(TF_binding_site|BDTNP1_TFBS_dl|FBsf0000297470);(TF_binding_site|BDTNP1_TFBS_sna|FBsf0000268490)	FBgn0003502	The gene Btk family kinase at 29A is referred to in FlyBase by the symbol Dmel\Btk29A (CG8049, FBgn0003502). It is a protein_coding_gene from Drosophila melanogaster. It has 8 annotated transcripts and 8 polypeptides (4 unique). Gene sequence location is 2L:8258373..8301079. It has the cytological map location 29A1-29A3. Protein features are: PH domain-like; Pleckstrin homology domain; Protein ki…
FBtr0079615	2L_8267233_SNP	T	A	0.3688	59	101	2.64e-05	2.42e-05	0.79905	2L_8267233_SNP	A	SiteClass[FBgn0003502|Btk29A|INTRON|0],TranscriptAnnot[INTRON(MODIFIER||||603|Btk29A|protein_coding|CODING|FBtr0079615|2|1);INTRON(MODIFIER||||603|Btk29A|protein_coding|CODING|FBtr0079618|2|1);INTRON(MODIFIER||||603|Btk29A|protein_coding|CODING|FBtr0112835|1|1);INTRON(MODIFIER||||786|Btk29A|protein_coding|CODING|FBtr0079616|5|1);INTRON(MODIFIER||||786|Btk29A|protein_coding|CODING|FBtr0079617|5|1)…	(TF_binding_site|BDTNP1_TFBS_da|FBsf0000321905);(TF_binding_site|BDTNP1_TFBS_dl|FBsf0000297470);(TF_binding_site|BDTNP1_TFBS_sna|FBsf0000268490)
FBtr0079618	2L_8267233_SNP	T	A	0.3688	59	101	2.64e-05	2.42e-05	0.79905	2L_8267233_SNP	A	SiteClass[FBgn0003502|Btk29A|INTRON|0],TranscriptAnnot[INTRON(MODIFIER||||603|Btk29A|protein_coding|CODING|FBtr0079615|2|1);INTRON(MODIFIER||||603|Btk29A|protein_coding|CODING|FBtr0079618|2|1);INTRON(MODIFIER||||603|Btk29A|protein_coding|CODING|FBtr0112835|1|1);INTRON(MODIFIER||||786|Btk29A|protein_coding|CODING|FBtr0079616|5|1);INTRON(MODIFIER||||786|Btk29A|protein_coding|CODING|FBtr0079617|5|1)…	(TF_binding_site|BDTNP1_TFBS_da|FBsf0000321905);(TF_binding_site|BDTNP1_TFBS_dl|FBsf0000297470);(TF_binding_site|BDTNP1_TFBS_sna|FBsf0000268490)
FBtr0112835	2L_8267233_SNP	T	A	0.3688	59	101	2.64e-05	2.42e-05	0.79905	2L_8267233_SNP	A	SiteClass[FBgn0003502|Btk29A|INTRON|0],TranscriptAnnot[INTRON(MODIFIER||||603|Btk29A|protein_coding|CODING|FBtr0079615|2|1);INTRON(MODIFIER||||603|Btk29A|protein_coding|CODING|FBtr0079618|2|1);INTRON(MODIFIER||||603|Btk29A|protein_coding|CODING|FBtr0112835|1|1);INTRON(MODIFIER||||786|Btk29A|protein_coding|CODING|FBtr0079616|5|1);INTRON(MODIFIER||||786|Btk29A|protein_coding|CODING|FBtr0079617|5|1)…	(TF_binding_site|BDTNP1_TFBS_da|FBsf0000321905);(TF_binding_site|BDTNP1_TFBS_dl|FBsf0000297470);(TF_binding_site|BDTNP1_TFBS_sna|FBsf0000268490)
FBtr0079616	2L_8267233_SNP	T	A	0.3688	59	101	2.64e-05	2.42e-05	0.79905	2L_8267233_SNP	A	SiteClass[FBgn0003502|Btk29A|INTRON|0],TranscriptAnnot[INTRON(MODIFIER||||603|Btk29A|protein_coding|CODING|FBtr0079615|2|1);INTRON(MODIFIER||||603|Btk29A|protein_coding|CODING|FBtr0079618|2|1);INTRON(MODIFIER||||603|Btk29A|protein_coding|CODING|FBtr0112835|1|1);INTRON(MODIFIER||||786|Btk29A|protein_coding|CODING|FBtr0079616|5|1);INTRON(MODIFIER||||786|Btk29A|protein_coding|CODING|FBtr0079617|5|1)…	(TF_binding_site|BDTNP1_TFBS_da|FBsf0000321905);(TF_binding_site|BDTNP1_TFBS_dl|FBsf0000297470);(TF_binding_site|BDTNP1_TFBS_sna|FBsf0000268490)
FBtr0079617	2L_8267233_SNP	T	A	0.3688	59	101	2.64e-05	2.42e-05	0.79905	2L_8267233_SNP	A	SiteClass[FBgn0003502|Btk29A|INTRON|0],TranscriptAnnot[INTRON(MODIFIER||||603|Btk29A|protein_coding|CODING|FBtr0079615|2|1);INTRON(MODIFIER||||603|Btk29A|protein_coding|CODING|FBtr0079618|2|1);INTRON(MODIFIER||||603|Btk29A|protein_coding|CODING|FBtr0112835|1|1);INTRON(MODIFIER||||786|Btk29A|protein_coding|CODING|FBtr0079616|5|1);INTRON(MODIFIER||||786|Btk29A|protein_coding|CODING|FBtr0079617|5|1)…	(TF_binding_site|BDTNP1_TFBS_da|FBsf0000321905);(TF_binding_site|BDTNP1_TFBS_dl|FBsf0000297470);(TF_binding_site|BDTNP1_TFBS_sna|FBsf0000268490)
FBtr0112836	2L_8267233_SNP	T	A	0.3688	59	101	2.64e-05	2.42e-05	0.79905	2L_8267233_SNP	A	SiteClass[FBgn0003502|Btk29A|INTRON|0],TranscriptAnnot[INTRON(MODIFIER||||603|Btk29A|protein_coding|CODING|FBtr0079615|2|1);INTRON(MODIFIER||||603|Btk29A|protein_coding|CODING|FBtr0079618|2|1);INTRON(MODIFIER||||603|Btk29A|protein_coding|CODING|FBtr0112835|1|1);INTRON(MODIFIER||||786|Btk29A|protein_coding|CODING|FBtr0079616|5|1);INTRON(MODIFIER||||786|Btk29A|protein_coding|CODING|FBtr0079617|5|1)…	(TF_binding_site|BDTNP1_TFBS_da|FBsf0000321905);(TF_binding_site|BDTNP1_TFBS_dl|FBsf0000297470);(TF_binding_site|BDTNP1_TFBS_sna|FBsf0000268490)
FBtr0330693	2L_8267233_SNP	T	A	0.3688	59	101	2.64e-05	2.42e-05	0.79905	2L_8267233_SNP	A	SiteClass[FBgn0003502|Btk29A|INTRON|0],TranscriptAnnot[INTRON(MODIFIER||||603|Btk29A|protein_coding|CODING|FBtr0079615|2|1);INTRON(MODIFIER||||603|Btk29A|protein_coding|CODING|FBtr0079618|2|1);INTRON(MODIFIER||||603|Btk29A|protein_coding|CODING|FBtr0112835|1|1);INTRON(MODIFIER||||786|Btk29A|protein_coding|CODING|FBtr0079616|5|1);INTRON(MODIFIER||||786|Btk29A|protein_coding|CODING|FBtr0079617|5|1)…	(TF_binding_site|BDTNP1_TFBS_da|FBsf0000321905);(TF_binding_site|BDTNP1_TFBS_dl|FBsf0000297470);(TF_binding_site|BDTNP1_TFBS_sna|FBsf0000268490)
FBgn0266429	X_3480541_SNP	G	T	0.1429	24	144	2.26e-05	2.46e-05	0.79905	X_3480541_SNP	T	SiteClass[FBgn0266429|AstA-R1|INTRON|0],TranscriptAnnot[INTRON(MODIFIER||||394|AstA-R1|protein_coding|CODING|FBtr0070575|1|1);INTRON(MODIFIER||||394|AstA-R1|protein_coding|CODING|FBtr0333798|1|1)]	-	FBgn0266429	The gene Allatostatin A receptor 1 is referred to in FlyBase by the symbol Dmel\AstA-R1 (CG2872, FBgn0266429). It is a protein_coding_gene from Drosophila melanogaster. It has 2 annotated transcripts and 2 polypeptides (1 unique). Gene sequence location is X:3574536..3666724. It has the cytological map location 3D6-3E2. Protein features are: G protein-coupled receptor, rhodopsin-like; GPCR, rhodo…
FBtr0070575	X_3480541_SNP	G	T	0.1429	24	144	2.26e-05	2.46e-05	0.79905	X_3480541_SNP	T	SiteClass[FBgn0266429|AstA-R1|INTRON|0],TranscriptAnnot[INTRON(MODIFIER||||394|AstA-R1|protein_coding|CODING|FBtr0070575|1|1);INTRON(MODIFIER||||394|AstA-R1|protein_coding|CODING|FBtr0333798|1|1)]	-
FBtr0333798	X_3480541_SNP	G	T	0.1429	24	144	2.26e-05	2.46e-05	0.79905	X_3480541_SNP	T	SiteClass[FBgn0266429|AstA-R1|INTRON|0],TranscriptAnnot[INTRON(MODIFIER||||394|AstA-R1|protein_coding|CODING|FBtr0070575|1|1);INTRON(MODIFIER||||394|AstA-R1|protein_coding|CODING|FBtr0333798|1|1)]	-
FBgn0087007	3L_14509654_SNP	G	C	0.05056	9	169	2.56e-05	2.49e-05	0.79905	3L_14509654_SNP	C	SiteClass[FBgn0087007|bbg|INTRON|0],TranscriptAnnot[INTRON(MODIFIER||||2637|bbg|protein_coding|CODING|FBtr0273422|2|1);INTRON(MODIFIER||||2637|bbg|protein_coding|CODING|FBtr0308596|2|1)]	-	FBgn0087007	The gene big bang is referred to in FlyBase by the symbol Dmel\bbg (CG42230, FBgn0087007). It is a protein_coding_gene from Drosophila melanogaster. It has 8 annotated transcripts and 8 polypeptides (5 unique). Gene sequence location is 3L:14412828..14536276. It has the cytological map location 70D7-70E1. Protein features are: PDZ domain. Its molecular function is unknown. It is involved in the b…
FBtr0273422	3L_14509654_SNP	G	C	0.05056	9	169	2.56e-05	2.49e-05	0.79905	3L_14509654_SNP	C	SiteClass[FBgn0087007|bbg|INTRON|0],TranscriptAnnot[INTRON(MODIFIER||||2637|bbg|protein_coding|CODING|FBtr0273422|2|1);INTRON(MODIFIER||||2637|bbg|protein_coding|CODING|FBtr0308596|2|1)]	-
FBtr0308596	3L_14509654_SNP	G	C	0.05056	9	169	2.56e-05	2.49e-05	0.79905	3L_14509654_SNP	C	SiteClass[FBgn0087007|bbg|INTRON|0],TranscriptAnnot[INTRON(MODIFIER||||2637|bbg|protein_coding|CODING|FBtr0273422|2|1);INTRON(MODIFIER||||2637|bbg|protein_coding|CODING|FBtr0308596|2|1)]	-
FBgn0033739	2R_8334505_SNP	G	T	0.3019	48	111	3.59e-05	2.58e-05	0.79905	2R_8334505_SNP	G	SiteClass[FBgn0033739|Dyb|INTRON|0],TranscriptAnnot[INTRON(MODIFIER||||623|Dyb|protein_coding|CODING|FBtr0087930|1|1);INTRON(MODIFIER||||655|Dyb|protein_coding|CODING|FBtr0305077|1|1);INTRON(MODIFIER||||702|Dyb|protein_coding|CODING|FBtr0308613|1|1);INTRON(MODIFIER||||614|Dyb|protein_coding|CODING|FBtr0087929|1|1);INTRON(MODIFIER||||646|Dyb|protein_coding|CODING|FBtr0100298|1|1);INTRON(MODIFIER||…	-	FBgn0033739	The gene Dystrobrevin is referred to in FlyBase by the symbol Dmel\Dyb (CG8529, FBgn0033739). It is a protein_coding_gene from Drosophila melanogaster. It has 7 annotated transcripts and 7 polypeptides (all unique). Gene sequence location is 2R:12437345..12452916. It has the cytological map location 49A6. Protein features are: Distrobrevin; EF-hand domain pair; EF-hand domain, type 1; EF-hand dom…
FBtr0087930	2R_8334505_SNP	G	T	0.3019	48	111	3.59e-05	2.58e-05	0.79905	2R_8334505_SNP	G	SiteClass[FBgn0033739|Dyb|INTRON|0],TranscriptAnnot[INTRON(MODIFIER||||623|Dyb|protein_coding|CODING|FBtr0087930|1|1);INTRON(MODIFIER||||655|Dyb|protein_coding|CODING|FBtr0305077|1|1);INTRON(MODIFIER||||702|Dyb|protein_coding|CODING|FBtr0308613|1|1);INTRON(MODIFIER||||614|Dyb|protein_coding|CODING|FBtr0087929|1|1);INTRON(MODIFIER||||646|Dyb|protein_coding|CODING|FBtr0100298|1|1);INTRON(MODIFIER||…	-
FBtr0305077	2R_8334505_SNP	G	T	0.3019	48	111	3.59e-05	2.58e-05	0.79905	2R_8334505_SNP	G	SiteClass[FBgn0033739|Dyb|INTRON|0],TranscriptAnnot[INTRON(MODIFIER||||623|Dyb|protein_coding|CODING|FBtr0087930|1|1);INTRON(MODIFIER||||655|Dyb|protein_coding|CODING|FBtr0305077|1|1);INTRON(MODIFIER||||702|Dyb|protein_coding|CODING|FBtr0308613|1|1);INTRON(MODIFIER||||614|Dyb|protein_coding|CODING|FBtr0087929|1|1);INTRON(MODIFIER||||646|Dyb|protein_coding|CODING|FBtr0100298|1|1);INTRON(MODIFIER||…	-
FBtr0308613	2R_8334505_SNP	G	T	0.3019	48	111	3.59e-05	2.58e-05	0.79905	2R_8334505_SNP	G	SiteClass[FBgn0033739|Dyb|INTRON|0],TranscriptAnnot[INTRON(MODIFIER||||623|Dyb|protein_coding|CODING|FBtr0087930|1|1);INTRON(MODIFIER||||655|Dyb|protein_coding|CODING|FBtr0305077|1|1);INTRON(MODIFIER||||702|Dyb|protein_coding|CODING|FBtr0308613|1|1);INTRON(MODIFIER||||614|Dyb|protein_coding|CODING|FBtr0087929|1|1);INTRON(MODIFIER||||646|Dyb|protein_coding|CODING|FBtr0100298|1|1);INTRON(MODIFIER||…	-
FBtr0087929	2R_8334505_SNP	G	T	0.3019	48	111	3.59e-05	2.58e-05	0.79905	2R_8334505_SNP	G	SiteClass[FBgn0033739|Dyb|INTRON|0],TranscriptAnnot[INTRON(MODIFIER||||623|Dyb|protein_coding|CODING|FBtr0087930|1|1);INTRON(MODIFIER||||655|Dyb|protein_coding|CODING|FBtr0305077|1|1);INTRON(MODIFIER||||702|Dyb|protein_coding|CODING|FBtr0308613|1|1);INTRON(MODIFIER||||614|Dyb|protein_coding|CODING|FBtr0087929|1|1);INTRON(MODIFIER||||646|Dyb|protein_coding|CODING|FBtr0100298|1|1);INTRON(MODIFIER||…	-
FBtr0100298	2R_8334505_SNP	G	T	0.3019	48	111	3.59e-05	2.58e-05	0.79905	2R_8334505_SNP	G	SiteClass[FBgn0033739|Dyb|INTRON|0],TranscriptAnnot[INTRON(MODIFIER||||623|Dyb|protein_coding|CODING|FBtr0087930|1|1);INTRON(MODIFIER||||655|Dyb|protein_coding|CODING|FBtr0305077|1|1);INTRON(MODIFIER||||702|Dyb|protein_coding|CODING|FBtr0308613|1|1);INTRON(MODIFIER||||614|Dyb|protein_coding|CODING|FBtr0087929|1|1);INTRON(MODIFIER||||646|Dyb|protein_coding|CODING|FBtr0100298|1|1);INTRON(MODIFIER||…	-
FBtr0113074	2R_8334505_SNP	G	T	0.3019	48	111	3.59e-05	2.58e-05	0.79905	2R_8334505_SNP	G	SiteClass[FBgn0033739|Dyb|INTRON|0],TranscriptAnnot[INTRON(MODIFIER||||623|Dyb|protein_coding|CODING|FBtr0087930|1|1);INTRON(MODIFIER||||655|Dyb|protein_coding|CODING|FBtr0305077|1|1);INTRON(MODIFIER||||702|Dyb|protein_coding|CODING|FBtr0308613|1|1);INTRON(MODIFIER||||614|Dyb|protein_coding|CODING|FBtr0087929|1|1);INTRON(MODIFIER||||646|Dyb|protein_coding|CODING|FBtr0100298|1|1);INTRON(MODIFIER||…	-
FBtr0305076	2R_8334505_SNP	G	T	0.3019	48	111	3.59e-05	2.58e-05	0.79905	2R_8334505_SNP	G	SiteClass[FBgn0033739|Dyb|INTRON|0],TranscriptAnnot[INTRON(MODIFIER||||623|Dyb|protein_coding|CODING|FBtr0087930|1|1);INTRON(MODIFIER||||655|Dyb|protein_coding|CODING|FBtr0305077|1|1);INTRON(MODIFIER||||702|Dyb|protein_coding|CODING|FBtr0308613|1|1);INTRON(MODIFIER||||614|Dyb|protein_coding|CODING|FBtr0087929|1|1);INTRON(MODIFIER||||646|Dyb|protein_coding|CODING|FBtr0100298|1|1);INTRON(MODIFIER||…	-
FBgn0250867	2L_20996455_SNP	C	T	0.07471	13	161	3.21e-05	2.59e-05	0.79905	2L_20996455_SNP	T	SiteClass[FBgn0250867|CG42238|INTRON|0],TranscriptAnnot[INTRON(MODIFIER||||148|CG42238|protein_coding|CODING|FBtr0290305|1|1);INTRON(MODIFIER||||100|CG42238|protein_coding|CODING|FBtr0331199|4|1)]	(TF_binding_site|BDTNP1_TFBS_da|FBsf0000323060);(TF_binding_site|BDTNP1_TFBS_dl|FBsf0000299709);(TF_binding_site|BDTNP1_TFBS_Med|FBsf0000279119);(TF_binding_site|BDTNP1_TFBS_prd|FBsf0000275210);(TF_binding_site|BDTNP1_TFBS_sna|FBsf0000268883);(TF_binding_site|mE1_TFBS_HSA|FBsf0000352972);(TF_binding_site|mE1_TFBS_sens|FBsf0000218534)	FBgn0250867	This	gene	is	referred	to	in	FlyBase	by	the	symbol	Dmel\CG42238	(FBgn0250867).	It	is	a	protein_coding_gene	from	Drosophila	melanogaster.	It	has	5	annotated	transcripts	and	5	polypeptides	(2	unique).	Gene	sequence	location	is	2L:20965520..21052164.	It
FBtr0290305	2L_20996455_SNP	C	T	0.07471	13	161	3.21e-05	2.59e-05	0.79905	2L_20996455_SNP	T	SiteClass[FBgn0250867|CG42238|INTRON|0],TranscriptAnnot[INTRON(MODIFIER||||148|CG42238|protein_coding|CODING|FBtr0290305|1|1);INTRON(MODIFIER||||100|CG42238|protein_coding|CODING|FBtr0331199|4|1)]	(TF_binding_site|BDTNP1_TFBS_da|FBsf0000323060);(TF_binding_site|BDTNP1_TFBS_dl|FBsf0000299709);(TF_binding_site|BDTNP1_TFBS_Med|FBsf0000279119);(TF_binding_site|BDTNP1_TFBS_prd|FBsf0000275210);(TF_binding_site|BDTNP1_TFBS_sna|FBsf0000268883);(TF_binding_site|mE1_TFBS_HSA|FBsf0000352972);(TF_binding_site|mE1_TFBS_sens|FBsf0000218534)
FBtr0331199	2L_20996455_SNP	C	T	0.07471	13	161	3.21e-05	2.59e-05	0.79905	2L_20996455_SNP	T	SiteClass[FBgn0250867|CG42238|INTRON|0],TranscriptAnnot[INTRON(MODIFIER||||148|CG42238|protein_coding|CODING|FBtr0290305|1|1);INTRON(MODIFIER||||100|CG42238|protein_coding|CODING|FBtr0331199|4|1)]	(TF_binding_site|BDTNP1_TFBS_da|FBsf0000323060);(TF_binding_site|BDTNP1_TFBS_dl|FBsf0000299709);(TF_binding_site|BDTNP1_TFBS_Med|FBsf0000279119);(TF_binding_site|BDTNP1_TFBS_prd|FBsf0000275210);(TF_binding_site|BDTNP1_TFBS_sna|FBsf0000268883);(TF_binding_site|mE1_TFBS_HSA|FBsf0000352972);(TF_binding_site|mE1_TFBS_sens|FBsf0000218534)
FBgn0032857	2L_20389298_SNP	T	A	0.07558	13	159	2.98e-05	2.78e-05	0.79905	2L_20389298_SNP	A	SiteClass[FBgn0032857|CG10947|INTRON|0],TranscriptAnnot[INTRON(MODIFIER||||404|CG10947|protein_coding|CODING|FBtr0081369|1|1);INTRON(MODIFIER||||404|CG10947|protein_coding|CODING|FBtr0081370|1|1);INTRON(MODIFIER||||404|CG10947|protein_coding|CODING|FBtr0336750|1|1)]	-	FBgn0032857	This gene is referred to in FlyBase by the symbol Dmel\CG10947 (FBgn0032857). It is a protein_coding_gene from Drosophila melanogaster. It has 3 annotated transcripts and 3 polypeptides (1 unique). Gene sequence location is 2L:20385293..20414800. It has the cytological map location 38C6. Protein features are: Lysine methyltransferase; S-adenosyl-L-methionine-dependent methyltransferase. Its molec…
FBtr0081369	2L_20389298_SNP	T	A	0.07558	13	159	2.98e-05	2.78e-05	0.79905	2L_20389298_SNP	A	SiteClass[FBgn0032857|CG10947|INTRON|0],TranscriptAnnot[INTRON(MODIFIER||||404|CG10947|protein_coding|CODING|FBtr0081369|1|1);INTRON(MODIFIER||||404|CG10947|protein_coding|CODING|FBtr0081370|1|1);INTRON(MODIFIER||||404|CG10947|protein_coding|CODING|FBtr0336750|1|1)]	-
FBtr0081370	2L_20389298_SNP	T	A	0.07558	13	159	2.98e-05	2.78e-05	0.79905	2L_20389298_SNP	A	SiteClass[FBgn0032857|CG10947|INTRON|0],TranscriptAnnot[INTRON(MODIFIER||||404|CG10947|protein_coding|CODING|FBtr0081369|1|1);INTRON(MODIFIER||||404|CG10947|protein_coding|CODING|FBtr0081370|1|1);INTRON(MODIFIER||||404|CG10947|protein_coding|CODING|FBtr0336750|1|1)]	-
FBtr0336750	2L_20389298_SNP	T	A	0.07558	13	159	2.98e-05	2.78e-05	0.79905	2L_20389298_SNP	A	SiteClass[FBgn0032857|CG10947|INTRON|0],TranscriptAnnot[INTRON(MODIFIER||||404|CG10947|protein_coding|CODING|FBtr0081369|1|1);INTRON(MODIFIER||||404|CG10947|protein_coding|CODING|FBtr0081370|1|1);INTRON(MODIFIER||||404|CG10947|protein_coding|CODING|FBtr0336750|1|1)]	-
FBgn0265894	3L_20618992_SNP	C	T	0.09605	17	160	3.47e-05	2.83e-05	0.79905	3L_20618992_SNP	T	SiteClass[FBgn0265894|CR44683|DOWNSTREAM|688;FBgn0265891|CR44680|UPSTREAM|709],TranscriptAnnot[UPSTREAM(MODIFIER||709|||CR44680|ncRNA|NON_CODING|FBtr0342776||1);DOWNSTREAM(MODIFIER||688|||CR44683|ncRNA|NON_CODING|FBtr0342780||1);DOWNSTREAM(MODIFIER||688|||CR44683|ncRNA|NON_CODING|FBtr0342781||1);INTERGENIC(MODIFIER||||||||||1)]	(TF_binding_site|mE1_TFBS_HSA|FBsf0000367236);(TF_binding_site|mE1_TFBS_sens|FBsf0000225459)	FBgn0265894	This	gene	is	referred	to	in	FlyBase	by	the	symbol	Dmel\CR44683	(FBgn0265894).	It	is	a	non_protein_coding_gene	from	Drosophila	melanogaster.	It	has	2	annotated	transcripts.	Gene	sequence	location	is	3L:20626580..20628498.	It	has	the	cytological	map	location
FBgn0265891	3L_20618992_SNP	C	T	0.09605	17	160	3.47e-05	2.83e-05	0.79905	3L_20618992_SNP	T	SiteClass[FBgn0265894|CR44683|DOWNSTREAM|688;FBgn0265891|CR44680|UPSTREAM|709],TranscriptAnnot[UPSTREAM(MODIFIER||709|||CR44680|ncRNA|NON_CODING|FBtr0342776||1);DOWNSTREAM(MODIFIER||688|||CR44683|ncRNA|NON_CODING|FBtr0342780||1);DOWNSTREAM(MODIFIER||688|||CR44683|ncRNA|NON_CODING|FBtr0342781||1);INTERGENIC(MODIFIER||||||||||1)]	(TF_binding_site|mE1_TFBS_HSA|FBsf0000367236);(TF_binding_site|mE1_TFBS_sens|FBsf0000225459)	FBgn0265891	This	gene	is	referred	to	in	FlyBase	by	the	symbol	Dmel\CR44680	(FBgn0265891).	It	is	a	non_protein_coding_gene	from	Drosophila	melanogaster.	It	has	one	annotated	transcript.	Gene	sequence	location	is	3L:20626601..20627624.	It	has	the	cytological	map	location
FBtr0342776	3L_20618992_SNP	C	T	0.09605	17	160	3.47e-05	2.83e-05	0.79905	3L_20618992_SNP	T	SiteClass[FBgn0265894|CR44683|DOWNSTREAM|688;FBgn0265891|CR44680|UPSTREAM|709],TranscriptAnnot[UPSTREAM(MODIFIER||709|||CR44680|ncRNA|NON_CODING|FBtr0342776||1);DOWNSTREAM(MODIFIER||688|||CR44683|ncRNA|NON_CODING|FBtr0342780||1);DOWNSTREAM(MODIFIER||688|||CR44683|ncRNA|NON_CODING|FBtr0342781||1);INTERGENIC(MODIFIER||||||||||1)]	(TF_binding_site|mE1_TFBS_HSA|FBsf0000367236);(TF_binding_site|mE1_TFBS_sens|FBsf0000225459)
FBtr0342780	3L_20618992_SNP	C	T	0.09605	17	160	3.47e-05	2.83e-05	0.79905	3L_20618992_SNP	T	SiteClass[FBgn0265894|CR44683|DOWNSTREAM|688;FBgn0265891|CR44680|UPSTREAM|709],TranscriptAnnot[UPSTREAM(MODIFIER||709|||CR44680|ncRNA|NON_CODING|FBtr0342776||1);DOWNSTREAM(MODIFIER||688|||CR44683|ncRNA|NON_CODING|FBtr0342780||1);DOWNSTREAM(MODIFIER||688|||CR44683|ncRNA|NON_CODING|FBtr0342781||1);INTERGENIC(MODIFIER||||||||||1)]	(TF_binding_site|mE1_TFBS_HSA|FBsf0000367236);(TF_binding_site|mE1_TFBS_sens|FBsf0000225459)
FBtr0342781	3L_20618992_SNP	C	T	0.09605	17	160	3.47e-05	2.83e-05	0.79905	3L_20618992_SNP	T	SiteClass[FBgn0265894|CR44683|DOWNSTREAM|688;FBgn0265891|CR44680|UPSTREAM|709],TranscriptAnnot[UPSTREAM(MODIFIER||709|||CR44680|ncRNA|NON_CODING|FBtr0342776||1);DOWNSTREAM(MODIFIER||688|||CR44683|ncRNA|NON_CODING|FBtr0342780||1);DOWNSTREAM(MODIFIER||688|||CR44683|ncRNA|NON_CODING|FBtr0342781||1);INTERGENIC(MODIFIER||||||||||1)]	(TF_binding_site|mE1_TFBS_HSA|FBsf0000367236);(TF_binding_site|mE1_TFBS_sens|FBsf0000225459)
FBgn0004876	3R_14884001_SNP	T	A	0.3179	55	118	2.61e-05	2.9e-05	0.79905	3R_14884001_SNP	T	SiteClass[FBgn0004876|cdi|INTRON|0],TranscriptAnnot[INTRON(MODIFIER||||1213|cdi|protein_coding|CODING|FBtr0083716|3|1);INTRON(MODIFIER||||942|cdi|protein_coding|CODING|FBtr0305321|3|1)]	(TF_binding_site|BDTNP1_TFBS_hb|FBsf0000292616);(TF_binding_site|BDTNP1_TFBS_twi|FBsf0000265458);(TF_binding_site|mE1_TFBS_chinmo|FBsf0000212937);(TF_binding_site|mE1_TFBS_HSA|FBsf0000373067)	FBgn0004876	The gene center divider is referred to in FlyBase by the symbol Dmel\cdi (CG6027, FBgn0004876). It is a protein_coding_gene from Drosophila melanogaster. It has 2 annotated transcripts and 2 polypeptides (all unique). Gene sequence location is 3R:19044882..19094270. It has the cytological map location 91E4-91F1. Protein features are: Protein kinase domain; Protein kinase, ATP binding site; Protei…
FBtr0083716	3R_14884001_SNP	T	A	0.3179	55	118	2.61e-05	2.9e-05	0.79905	3R_14884001_SNP	T	SiteClass[FBgn0004876|cdi|INTRON|0],TranscriptAnnot[INTRON(MODIFIER||||1213|cdi|protein_coding|CODING|FBtr0083716|3|1);INTRON(MODIFIER||||942|cdi|protein_coding|CODING|FBtr0305321|3|1)]	(TF_binding_site|BDTNP1_TFBS_hb|FBsf0000292616);(TF_binding_site|BDTNP1_TFBS_twi|FBsf0000265458);(TF_binding_site|mE1_TFBS_chinmo|FBsf0000212937);(TF_binding_site|mE1_TFBS_HSA|FBsf0000373067)
FBtr0305321	3R_14884001_SNP	T	A	0.3179	55	118	2.61e-05	2.9e-05	0.79905	3R_14884001_SNP	T	SiteClass[FBgn0004876|cdi|INTRON|0],TranscriptAnnot[INTRON(MODIFIER||||1213|cdi|protein_coding|CODING|FBtr0083716|3|1);INTRON(MODIFIER||||942|cdi|protein_coding|CODING|FBtr0305321|3|1)]	(TF_binding_site|BDTNP1_TFBS_hb|FBsf0000292616);(TF_binding_site|BDTNP1_TFBS_twi|FBsf0000265458);(TF_binding_site|mE1_TFBS_chinmo|FBsf0000212937);(TF_binding_site|mE1_TFBS_HSA|FBsf0000373067)
FBgn0262103	2R_14581267_SNP	G	T	0.2701	47	127	4.05e-05	2.92e-05	0.79905	2R_14581267_SNP	T	SiteClass[FBgn0262103|Sik3|INTRON|0],TranscriptAnnot[INTRON(MODIFIER||||702|Sik3|protein_coding|CODING|FBtr0304024|2|1);INTRON(MODIFIER||||1471|Sik3|protein_coding|CODING|FBtr0304025|2|1);INTRON(MODIFIER||||1471|Sik3|protein_coding|CODING|FBtr0304026|2|1);INTRON(MODIFIER||||1468|Sik3|protein_coding|CODING|FBtr0340388|2|1);INTRON(MODIFIER||||1382|Sik3|protein_coding|CODING|FBtr0344258|2|1);INTRON(…	(TF_binding_site|BDTNP1_TFBS_da|FBsf0000324711);(TF_binding_site|BDTNP1_TFBS_twi|FBsf0000199781)	FBgn0262103	The gene Salt-inducible kinase 3 is referred to in FlyBase by the symbol Dmel\Sik3 (CG42856, FBgn0262103). It is a protein_coding_gene from Drosophila melanogaster. It has 6 annotated transcripts and 6 polypeptides (5 unique). Gene sequence location is 2R:18688132..18705805. It has the cytological map location 55E8-55E9. Protein features are: KA1 domain/Ssp2, C-terminal; Kinase associated domain …
FBtr0304024	2R_14581267_SNP	G	T	0.2701	47	127	4.05e-05	2.92e-05	0.79905	2R_14581267_SNP	T	SiteClass[FBgn0262103|Sik3|INTRON|0],TranscriptAnnot[INTRON(MODIFIER||||702|Sik3|protein_coding|CODING|FBtr0304024|2|1);INTRON(MODIFIER||||1471|Sik3|protein_coding|CODING|FBtr0304025|2|1);INTRON(MODIFIER||||1471|Sik3|protein_coding|CODING|FBtr0304026|2|1);INTRON(MODIFIER||||1468|Sik3|protein_coding|CODING|FBtr0340388|2|1);INTRON(MODIFIER||||1382|Sik3|protein_coding|CODING|FBtr0344258|2|1);INTRON(…	(TF_binding_site|BDTNP1_TFBS_da|FBsf0000324711);(TF_binding_site|BDTNP1_TFBS_twi|FBsf0000199781)
FBtr0304025	2R_14581267_SNP	G	T	0.2701	47	127	4.05e-05	2.92e-05	0.79905	2R_14581267_SNP	T	SiteClass[FBgn0262103|Sik3|INTRON|0],TranscriptAnnot[INTRON(MODIFIER||||702|Sik3|protein_coding|CODING|FBtr0304024|2|1);INTRON(MODIFIER||||1471|Sik3|protein_coding|CODING|FBtr0304025|2|1);INTRON(MODIFIER||||1471|Sik3|protein_coding|CODING|FBtr0304026|2|1);INTRON(MODIFIER||||1468|Sik3|protein_coding|CODING|FBtr0340388|2|1);INTRON(MODIFIER||||1382|Sik3|protein_coding|CODING|FBtr0344258|2|1);INTRON(…	(TF_binding_site|BDTNP1_TFBS_da|FBsf0000324711);(TF_binding_site|BDTNP1_TFBS_twi|FBsf0000199781)
FBtr0304026	2R_14581267_SNP	G	T	0.2701	47	127	4.05e-05	2.92e-05	0.79905	2R_14581267_SNP	T	SiteClass[FBgn0262103|Sik3|INTRON|0],TranscriptAnnot[INTRON(MODIFIER||||702|Sik3|protein_coding|CODING|FBtr0304024|2|1);INTRON(MODIFIER||||1471|Sik3|protein_coding|CODING|FBtr0304025|2|1);INTRON(MODIFIER||||1471|Sik3|protein_coding|CODING|FBtr0304026|2|1);INTRON(MODIFIER||||1468|Sik3|protein_coding|CODING|FBtr0340388|2|1);INTRON(MODIFIER||||1382|Sik3|protein_coding|CODING|FBtr0344258|2|1);INTRON(…	(TF_binding_site|BDTNP1_TFBS_da|FBsf0000324711);(TF_binding_site|BDTNP1_TFBS_twi|FBsf0000199781)
FBtr0340388	2R_14581267_SNP	G	T	0.2701	47	127	4.05e-05	2.92e-05	0.79905	2R_14581267_SNP	T	SiteClass[FBgn0262103|Sik3|INTRON|0],TranscriptAnnot[INTRON(MODIFIER||||702|Sik3|protein_coding|CODING|FBtr0304024|2|1);INTRON(MODIFIER||||1471|Sik3|protein_coding|CODING|FBtr0304025|2|1);INTRON(MODIFIER||||1471|Sik3|protein_coding|CODING|FBtr0304026|2|1);INTRON(MODIFIER||||1468|Sik3|protein_coding|CODING|FBtr0340388|2|1);INTRON(MODIFIER||||1382|Sik3|protein_coding|CODING|FBtr0344258|2|1);INTRON(…	(TF_binding_site|BDTNP1_TFBS_da|FBsf0000324711);(TF_binding_site|BDTNP1_TFBS_twi|FBsf0000199781)
FBtr0344258	2R_14581267_SNP	G	T	0.2701	47	127	4.05e-05	2.92e-05	0.79905	2R_14581267_SNP	T	SiteClass[FBgn0262103|Sik3|INTRON|0],TranscriptAnnot[INTRON(MODIFIER||||702|Sik3|protein_coding|CODING|FBtr0304024|2|1);INTRON(MODIFIER||||1471|Sik3|protein_coding|CODING|FBtr0304025|2|1);INTRON(MODIFIER||||1471|Sik3|protein_coding|CODING|FBtr0304026|2|1);INTRON(MODIFIER||||1468|Sik3|protein_coding|CODING|FBtr0340388|2|1);INTRON(MODIFIER||||1382|Sik3|protein_coding|CODING|FBtr0344258|2|1);INTRON(…	(TF_binding_site|BDTNP1_TFBS_da|FBsf0000324711);(TF_binding_site|BDTNP1_TFBS_twi|FBsf0000199781)
FBtr0344259	2R_14581267_SNP	G	T	0.2701	47	127	4.05e-05	2.92e-05	0.79905	2R_14581267_SNP	T	SiteClass[FBgn0262103|Sik3|INTRON|0],TranscriptAnnot[INTRON(MODIFIER||||702|Sik3|protein_coding|CODING|FBtr0304024|2|1);INTRON(MODIFIER||||1471|Sik3|protein_coding|CODING|FBtr0304025|2|1);INTRON(MODIFIER||||1471|Sik3|protein_coding|CODING|FBtr0304026|2|1);INTRON(MODIFIER||||1468|Sik3|protein_coding|CODING|FBtr0340388|2|1);INTRON(MODIFIER||||1382|Sik3|protein_coding|CODING|FBtr0344258|2|1);INTRON(…	(TF_binding_site|BDTNP1_TFBS_da|FBsf0000324711);(TF_binding_site|BDTNP1_TFBS_twi|FBsf0000199781)
FBgn0266429	X_3480932_SNP	G	A	0.1737	29	138	3.2e-05	3.06e-05	0.79905	X_3480932_SNP	A	SiteClass[FBgn0266429|AstA-R1|INTRON|0],TranscriptAnnot[INTRON(MODIFIER||||394|AstA-R1|protein_coding|CODING|FBtr0070575|1|1);INTRON(MODIFIER||||394|AstA-R1|protein_coding|CODING|FBtr0333798|1|1)]	-	FBgn0266429	The gene Allatostatin A receptor 1 is referred to in FlyBase by the symbol Dmel\AstA-R1 (CG2872, FBgn0266429). It is a protein_coding_gene from Drosophila melanogaster. It has 2 annotated transcripts and 2 polypeptides (1 unique). Gene sequence location is X:3574536..3666724. It has the cytological map location 3D6-3E2. Protein features are: G protein-coupled receptor, rhodopsin-like; GPCR, rhodo…
FBtr0070575	X_3480932_SNP	G	A	0.1737	29	138	3.2e-05	3.06e-05	0.79905	X_3480932_SNP	A	SiteClass[FBgn0266429|AstA-R1|INTRON|0],TranscriptAnnot[INTRON(MODIFIER||||394|AstA-R1|protein_coding|CODING|FBtr0070575|1|1);INTRON(MODIFIER||||394|AstA-R1|protein_coding|CODING|FBtr0333798|1|1)]	-
FBtr0333798	X_3480932_SNP	G	A	0.1737	29	138	3.2e-05	3.06e-05	0.79905	X_3480932_SNP	A	SiteClass[FBgn0266429|AstA-R1|INTRON|0],TranscriptAnnot[INTRON(MODIFIER||||394|AstA-R1|protein_coding|CODING|FBtr0070575|1|1);INTRON(MODIFIER||||394|AstA-R1|protein_coding|CODING|FBtr0333798|1|1)]	-
FBgn0034797	2R_18799877_SNP	G	T	0.4882	83	87	3.06e-05	3.15e-05	0.79905	2R_18799877_SNP	G	SiteClass[FBgn0034797|nahoda|INTRON|0],TranscriptAnnot[SPLICE_SITE_REGION(LOW||||1335|nahoda|protein_coding|CODING|FBtr0071942|5|1);SPLICE_SITE_REGION(LOW||||1335|nahoda|protein_coding|CODING|FBtr0071943|5|1);SPLICE_SITE_REGION(LOW||||1148|nahoda|protein_coding|CODING|FBtr0304795|5|1);INTRON(MODIFIER||||1335|nahoda|protein_coding|CODING|FBtr0071942|5|1);INTRON(MODIFIER||||1335|nahoda|protein_codi…	(TF_binding_site|BDTNP1_TFBS_dl|FBsf0000304016);(TF_binding_site|BDTNP1_TFBS_Med|FBsf0000281325);(TF_binding_site|BDTNP1_TFBS_slp1|FBsf0000272321);(TF_binding_site|mE1_TFBS_disco|FBsf0000259958);(TF_binding_site|mE1_TFBS_HSA|FBsf0000359597);(TF_binding_site|mE1_TFBS_sens|FBsf0000229512)	FBgn0034797	The gene nahoda is referred to in FlyBase by the symbol Dmel\nahoda (CG12781, FBgn0034797). It is a protein_coding_gene from Drosophila melanogaster. It has 3 annotated transcripts and 3 polypeptides (2 unique). Gene sequence location is 2R:22896174..22916719. It has the cytological map location 59B4. Protein features are: Chitin-binding, domain 3; DOMON domain; Dopamine beta-hydroxylase-related;…
FBtr0071942	2R_18799877_SNP	G	T	0.4882	83	87	3.06e-05	3.15e-05	0.79905	2R_18799877_SNP	G	SiteClass[FBgn0034797|nahoda|INTRON|0],TranscriptAnnot[SPLICE_SITE_REGION(LOW||||1335|nahoda|protein_coding|CODING|FBtr0071942|5|1);SPLICE_SITE_REGION(LOW||||1335|nahoda|protein_coding|CODING|FBtr0071943|5|1);SPLICE_SITE_REGION(LOW||||1148|nahoda|protein_coding|CODING|FBtr0304795|5|1);INTRON(MODIFIER||||1335|nahoda|protein_coding|CODING|FBtr0071942|5|1);INTRON(MODIFIER||||1335|nahoda|protein_codi…	(TF_binding_site|BDTNP1_TFBS_dl|FBsf0000304016);(TF_binding_site|BDTNP1_TFBS_Med|FBsf0000281325);(TF_binding_site|BDTNP1_TFBS_slp1|FBsf0000272321);(TF_binding_site|mE1_TFBS_disco|FBsf0000259958);(TF_binding_site|mE1_TFBS_HSA|FBsf0000359597);(TF_binding_site|mE1_TFBS_sens|FBsf0000229512)
FBtr0071943	2R_18799877_SNP	G	T	0.4882	83	87	3.06e-05	3.15e-05	0.79905	2R_18799877_SNP	G	SiteClass[FBgn0034797|nahoda|INTRON|0],TranscriptAnnot[SPLICE_SITE_REGION(LOW||||1335|nahoda|protein_coding|CODING|FBtr0071942|5|1);SPLICE_SITE_REGION(LOW||||1335|nahoda|protein_coding|CODING|FBtr0071943|5|1);SPLICE_SITE_REGION(LOW||||1148|nahoda|protein_coding|CODING|FBtr0304795|5|1);INTRON(MODIFIER||||1335|nahoda|protein_coding|CODING|FBtr0071942|5|1);INTRON(MODIFIER||||1335|nahoda|protein_codi…	(TF_binding_site|BDTNP1_TFBS_dl|FBsf0000304016);(TF_binding_site|BDTNP1_TFBS_Med|FBsf0000281325);(TF_binding_site|BDTNP1_TFBS_slp1|FBsf0000272321);(TF_binding_site|mE1_TFBS_disco|FBsf0000259958);(TF_binding_site|mE1_TFBS_HSA|FBsf0000359597);(TF_binding_site|mE1_TFBS_sens|FBsf0000229512)
FBtr0304795	2R_18799877_SNP	G	T	0.4882	83	87	3.06e-05	3.15e-05	0.79905	2R_18799877_SNP	G	SiteClass[FBgn0034797|nahoda|INTRON|0],TranscriptAnnot[SPLICE_SITE_REGION(LOW||||1335|nahoda|protein_coding|CODING|FBtr0071942|5|1);SPLICE_SITE_REGION(LOW||||1335|nahoda|protein_coding|CODING|FBtr0071943|5|1);SPLICE_SITE_REGION(LOW||||1148|nahoda|protein_coding|CODING|FBtr0304795|5|1);INTRON(MODIFIER||||1335|nahoda|protein_coding|CODING|FBtr0071942|5|1);INTRON(MODIFIER||||1335|nahoda|protein_codi…	(TF_binding_site|BDTNP1_TFBS_dl|FBsf0000304016);(TF_binding_site|BDTNP1_TFBS_Med|FBsf0000281325);(TF_binding_site|BDTNP1_TFBS_slp1|FBsf0000272321);(TF_binding_site|mE1_TFBS_disco|FBsf0000259958);(TF_binding_site|mE1_TFBS_HSA|FBsf0000359597);(TF_binding_site|mE1_TFBS_sens|FBsf0000229512)
FBtr0071942	2R_18799877_SNP	G	T	0.4882	83	87	3.06e-05	3.15e-05	0.79905	2R_18799877_SNP	G	SiteClass[FBgn0034797|nahoda|INTRON|0],TranscriptAnnot[SPLICE_SITE_REGION(LOW||||1335|nahoda|protein_coding|CODING|FBtr0071942|5|1);SPLICE_SITE_REGION(LOW||||1335|nahoda|protein_coding|CODING|FBtr0071943|5|1);SPLICE_SITE_REGION(LOW||||1148|nahoda|protein_coding|CODING|FBtr0304795|5|1);INTRON(MODIFIER||||1335|nahoda|protein_coding|CODING|FBtr0071942|5|1);INTRON(MODIFIER||||1335|nahoda|protein_codi…	(TF_binding_site|BDTNP1_TFBS_dl|FBsf0000304016);(TF_binding_site|BDTNP1_TFBS_Med|FBsf0000281325);(TF_binding_site|BDTNP1_TFBS_slp1|FBsf0000272321);(TF_binding_site|mE1_TFBS_disco|FBsf0000259958);(TF_binding_site|mE1_TFBS_HSA|FBsf0000359597);(TF_binding_site|mE1_TFBS_sens|FBsf0000229512)
FBtr0071943	2R_18799877_SNP	G	T	0.4882	83	87	3.06e-05	3.15e-05	0.79905	2R_18799877_SNP	G	SiteClass[FBgn0034797|nahoda|INTRON|0],TranscriptAnnot[SPLICE_SITE_REGION(LOW||||1335|nahoda|protein_coding|CODING|FBtr0071942|5|1);SPLICE_SITE_REGION(LOW||||1335|nahoda|protein_coding|CODING|FBtr0071943|5|1);SPLICE_SITE_REGION(LOW||||1148|nahoda|protein_coding|CODING|FBtr0304795|5|1);INTRON(MODIFIER||||1335|nahoda|protein_coding|CODING|FBtr0071942|5|1);INTRON(MODIFIER||||1335|nahoda|protein_codi…	(TF_binding_site|BDTNP1_TFBS_dl|FBsf0000304016);(TF_binding_site|BDTNP1_TFBS_Med|FBsf0000281325);(TF_binding_site|BDTNP1_TFBS_slp1|FBsf0000272321);(TF_binding_site|mE1_TFBS_disco|FBsf0000259958);(TF_binding_site|mE1_TFBS_HSA|FBsf0000359597);(TF_binding_site|mE1_TFBS_sens|FBsf0000229512)
FBtr0304795	2R_18799877_SNP	G	T	0.4882	83	87	3.06e-05	3.15e-05	0.79905	2R_18799877_SNP	G	SiteClass[FBgn0034797|nahoda|INTRON|0],TranscriptAnnot[SPLICE_SITE_REGION(LOW||||1335|nahoda|protein_coding|CODING|FBtr0071942|5|1);SPLICE_SITE_REGION(LOW||||1335|nahoda|protein_coding|CODING|FBtr0071943|5|1);SPLICE_SITE_REGION(LOW||||1148|nahoda|protein_coding|CODING|FBtr0304795|5|1);INTRON(MODIFIER||||1335|nahoda|protein_coding|CODING|FBtr0071942|5|1);INTRON(MODIFIER||||1335|nahoda|protein_codi…	(TF_binding_site|BDTNP1_TFBS_dl|FBsf0000304016);(TF_binding_site|BDTNP1_TFBS_Med|FBsf0000281325);(TF_binding_site|BDTNP1_TFBS_slp1|FBsf0000272321);(TF_binding_site|mE1_TFBS_disco|FBsf0000259958);(TF_binding_site|mE1_TFBS_HSA|FBsf0000359597);(TF_binding_site|mE1_TFBS_sens|FBsf0000229512)
FBgn0013718	3L_14199526_SNP	G	A	0.05952	10	158	3.18e-05	3.15e-05	0.79905	3L_14199526_SNP	A	SiteClass[FBgn0013718|nuf|INTRON|0],TranscriptAnnot[INTRON(MODIFIER||||502|nuf|protein_coding|CODING|FBtr0100039|4|1);INTRON(MODIFIER||||502|nuf|protein_coding|CODING|FBtr0100040|4|1);INTRON(MODIFIER||||515|nuf|protein_coding|CODING|FBtr0306624|4|1);INTRON(MODIFIER||||530|nuf|protein_coding|CODING|FBtr0306619|5|1);INTRON(MODIFIER||||529|nuf|protein_coding|CODING|FBtr0306620|5|1);INTRON(MODIFIER||…	(TF_binding_site|BDTNP1_TFBS_dl|FBsf0000307411);(TF_binding_site|BDTNP1_TFBS_hb|FBsf0000291415);(TF_binding_site|BDTNP1_TFBS_twi|FBsf0000203782);(TF_binding_site|mE1_TFBS_HSA|FBsf0000365120)	FBgn0013718	The gene nuclear fallout is referred to in FlyBase by the symbol Dmel\nuf (CG33991, FBgn0013718). It is a protein_coding_gene from Drosophila melanogaster. It has 12 annotated transcripts and 12 polypeptides (9 unique). Gene sequence location is 3L:14190870..14233250. It has the cytological map location 70D3-70D4. Protein features are: Rab-binding domain FIP-RBD. Its molecular function is describ…
FBtr0100039	3L_14199526_SNP	G	A	0.05952	10	158	3.18e-05	3.15e-05	0.79905	3L_14199526_SNP	A	SiteClass[FBgn0013718|nuf|INTRON|0],TranscriptAnnot[INTRON(MODIFIER||||502|nuf|protein_coding|CODING|FBtr0100039|4|1);INTRON(MODIFIER||||502|nuf|protein_coding|CODING|FBtr0100040|4|1);INTRON(MODIFIER||||515|nuf|protein_coding|CODING|FBtr0306624|4|1);INTRON(MODIFIER||||530|nuf|protein_coding|CODING|FBtr0306619|5|1);INTRON(MODIFIER||||529|nuf|protein_coding|CODING|FBtr0306620|5|1);INTRON(MODIFIER||…	(TF_binding_site|BDTNP1_TFBS_dl|FBsf0000307411);(TF_binding_site|BDTNP1_TFBS_hb|FBsf0000291415);(TF_binding_site|BDTNP1_TFBS_twi|FBsf0000203782);(TF_binding_site|mE1_TFBS_HSA|FBsf0000365120)
FBtr0100040	3L_14199526_SNP	G	A	0.05952	10	158	3.18e-05	3.15e-05	0.79905	3L_14199526_SNP	A	SiteClass[FBgn0013718|nuf|INTRON|0],TranscriptAnnot[INTRON(MODIFIER||||502|nuf|protein_coding|CODING|FBtr0100039|4|1);INTRON(MODIFIER||||502|nuf|protein_coding|CODING|FBtr0100040|4|1);INTRON(MODIFIER||||515|nuf|protein_coding|CODING|FBtr0306624|4|1);INTRON(MODIFIER||||530|nuf|protein_coding|CODING|FBtr0306619|5|1);INTRON(MODIFIER||||529|nuf|protein_coding|CODING|FBtr0306620|5|1);INTRON(MODIFIER||…	(TF_binding_site|BDTNP1_TFBS_dl|FBsf0000307411);(TF_binding_site|BDTNP1_TFBS_hb|FBsf0000291415);(TF_binding_site|BDTNP1_TFBS_twi|FBsf0000203782);(TF_binding_site|mE1_TFBS_HSA|FBsf0000365120)
FBtr0306624	3L_14199526_SNP	G	A	0.05952	10	158	3.18e-05	3.15e-05	0.79905	3L_14199526_SNP	A	SiteClass[FBgn0013718|nuf|INTRON|0],TranscriptAnnot[INTRON(MODIFIER||||502|nuf|protein_coding|CODING|FBtr0100039|4|1);INTRON(MODIFIER||||502|nuf|protein_coding|CODING|FBtr0100040|4|1);INTRON(MODIFIER||||515|nuf|protein_coding|CODING|FBtr0306624|4|1);INTRON(MODIFIER||||530|nuf|protein_coding|CODING|FBtr0306619|5|1);INTRON(MODIFIER||||529|nuf|protein_coding|CODING|FBtr0306620|5|1);INTRON(MODIFIER||…	(TF_binding_site|BDTNP1_TFBS_dl|FBsf0000307411);(TF_binding_site|BDTNP1_TFBS_hb|FBsf0000291415);(TF_binding_site|BDTNP1_TFBS_twi|FBsf0000203782);(TF_binding_site|mE1_TFBS_HSA|FBsf0000365120)
FBtr0306619	3L_14199526_SNP	G	A	0.05952	10	158	3.18e-05	3.15e-05	0.79905	3L_14199526_SNP	A	SiteClass[FBgn0013718|nuf|INTRON|0],TranscriptAnnot[INTRON(MODIFIER||||502|nuf|protein_coding|CODING|FBtr0100039|4|1);INTRON(MODIFIER||||502|nuf|protein_coding|CODING|FBtr0100040|4|1);INTRON(MODIFIER||||515|nuf|protein_coding|CODING|FBtr0306624|4|1);INTRON(MODIFIER||||530|nuf|protein_coding|CODING|FBtr0306619|5|1);INTRON(MODIFIER||||529|nuf|protein_coding|CODING|FBtr0306620|5|1);INTRON(MODIFIER||…	(TF_binding_site|BDTNP1_TFBS_dl|FBsf0000307411);(TF_binding_site|BDTNP1_TFBS_hb|FBsf0000291415);(TF_binding_site|BDTNP1_TFBS_twi|FBsf0000203782);(TF_binding_site|mE1_TFBS_HSA|FBsf0000365120)
FBtr0306620	3L_14199526_SNP	G	A	0.05952	10	158	3.18e-05	3.15e-05	0.79905	3L_14199526_SNP	A	SiteClass[FBgn0013718|nuf|INTRON|0],TranscriptAnnot[INTRON(MODIFIER||||502|nuf|protein_coding|CODING|FBtr0100039|4|1);INTRON(MODIFIER||||502|nuf|protein_coding|CODING|FBtr0100040|4|1);INTRON(MODIFIER||||515|nuf|protein_coding|CODING|FBtr0306624|4|1);INTRON(MODIFIER||||530|nuf|protein_coding|CODING|FBtr0306619|5|1);INTRON(MODIFIER||||529|nuf|protein_coding|CODING|FBtr0306620|5|1);INTRON(MODIFIER||…	(TF_binding_site|BDTNP1_TFBS_dl|FBsf0000307411);(TF_binding_site|BDTNP1_TFBS_hb|FBsf0000291415);(TF_binding_site|BDTNP1_TFBS_twi|FBsf0000203782);(TF_binding_site|mE1_TFBS_HSA|FBsf0000365120)
FBtr0307191	3L_14199526_SNP	G	A	0.05952	10	158	3.18e-05	3.15e-05	0.79905	3L_14199526_SNP	A	SiteClass[FBgn0013718|nuf|INTRON|0],TranscriptAnnot[INTRON(MODIFIER||||502|nuf|protein_coding|CODING|FBtr0100039|4|1);INTRON(MODIFIER||||502|nuf|protein_coding|CODING|FBtr0100040|4|1);INTRON(MODIFIER||||515|nuf|protein_coding|CODING|FBtr0306624|4|1);INTRON(MODIFIER||||530|nuf|protein_coding|CODING|FBtr0306619|5|1);INTRON(MODIFIER||||529|nuf|protein_coding|CODING|FBtr0306620|5|1);INTRON(MODIFIER||…	(TF_binding_site|BDTNP1_TFBS_dl|FBsf0000307411);(TF_binding_site|BDTNP1_TFBS_hb|FBsf0000291415);(TF_binding_site|BDTNP1_TFBS_twi|FBsf0000203782);(TF_binding_site|mE1_TFBS_HSA|FBsf0000365120)
FBtr0100042	3L_14199526_SNP	G	A	0.05952	10	158	3.18e-05	3.15e-05	0.79905	3L_14199526_SNP	A	SiteClass[FBgn0013718|nuf|INTRON|0],TranscriptAnnot[INTRON(MODIFIER||||502|nuf|protein_coding|CODING|FBtr0100039|4|1);INTRON(MODIFIER||||502|nuf|protein_coding|CODING|FBtr0100040|4|1);INTRON(MODIFIER||||515|nuf|protein_coding|CODING|FBtr0306624|4|1);INTRON(MODIFIER||||530|nuf|protein_coding|CODING|FBtr0306619|5|1);INTRON(MODIFIER||||529|nuf|protein_coding|CODING|FBtr0306620|5|1);INTRON(MODIFIER||…	(TF_binding_site|BDTNP1_TFBS_dl|FBsf0000307411);(TF_binding_site|BDTNP1_TFBS_hb|FBsf0000291415);(TF_binding_site|BDTNP1_TFBS_twi|FBsf0000203782);(TF_binding_site|mE1_TFBS_HSA|FBsf0000365120)
FBgn0013718	3L_14199524_SNP	A	G	0.05988	10	157	3.42e-05	3.21e-05	0.79905	3L_14199524_SNP	G	SiteClass[FBgn0013718|nuf|INTRON|0],TranscriptAnnot[INTRON(MODIFIER||||502|nuf|protein_coding|CODING|FBtr0100039|4|1);INTRON(MODIFIER||||502|nuf|protein_coding|CODING|FBtr0100040|4|1);INTRON(MODIFIER||||515|nuf|protein_coding|CODING|FBtr0306624|4|1);INTRON(MODIFIER||||530|nuf|protein_coding|CODING|FBtr0306619|5|1);INTRON(MODIFIER||||529|nuf|protein_coding|CODING|FBtr0306620|5|1);INTRON(MODIFIER||…	(TF_binding_site|BDTNP1_TFBS_dl|FBsf0000307411);(TF_binding_site|BDTNP1_TFBS_hb|FBsf0000291415);(TF_binding_site|BDTNP1_TFBS_twi|FBsf0000203782);(TF_binding_site|mE1_TFBS_HSA|FBsf0000365120)	FBgn0013718	The gene nuclear fallout is referred to in FlyBase by the symbol Dmel\nuf (CG33991, FBgn0013718). It is a protein_coding_gene from Drosophila melanogaster. It has 12 annotated transcripts and 12 polypeptides (9 unique). Gene sequence location is 3L:14190870..14233250. It has the cytological map location 70D3-70D4. Protein features are: Rab-binding domain FIP-RBD. Its molecular function is describ…
FBtr0100039	3L_14199524_SNP	A	G	0.05988	10	157	3.42e-05	3.21e-05	0.79905	3L_14199524_SNP	G	SiteClass[FBgn0013718|nuf|INTRON|0],TranscriptAnnot[INTRON(MODIFIER||||502|nuf|protein_coding|CODING|FBtr0100039|4|1);INTRON(MODIFIER||||502|nuf|protein_coding|CODING|FBtr0100040|4|1);INTRON(MODIFIER||||515|nuf|protein_coding|CODING|FBtr0306624|4|1);INTRON(MODIFIER||||530|nuf|protein_coding|CODING|FBtr0306619|5|1);INTRON(MODIFIER||||529|nuf|protein_coding|CODING|FBtr0306620|5|1);INTRON(MODIFIER||…	(TF_binding_site|BDTNP1_TFBS_dl|FBsf0000307411);(TF_binding_site|BDTNP1_TFBS_hb|FBsf0000291415);(TF_binding_site|BDTNP1_TFBS_twi|FBsf0000203782);(TF_binding_site|mE1_TFBS_HSA|FBsf0000365120)
FBtr0100040	3L_14199524_SNP	A	G	0.05988	10	157	3.42e-05	3.21e-05	0.79905	3L_14199524_SNP	G	SiteClass[FBgn0013718|nuf|INTRON|0],TranscriptAnnot[INTRON(MODIFIER||||502|nuf|protein_coding|CODING|FBtr0100039|4|1);INTRON(MODIFIER||||502|nuf|protein_coding|CODING|FBtr0100040|4|1);INTRON(MODIFIER||||515|nuf|protein_coding|CODING|FBtr0306624|4|1);INTRON(MODIFIER||||530|nuf|protein_coding|CODING|FBtr0306619|5|1);INTRON(MODIFIER||||529|nuf|protein_coding|CODING|FBtr0306620|5|1);INTRON(MODIFIER||…	(TF_binding_site|BDTNP1_TFBS_dl|FBsf0000307411);(TF_binding_site|BDTNP1_TFBS_hb|FBsf0000291415);(TF_binding_site|BDTNP1_TFBS_twi|FBsf0000203782);(TF_binding_site|mE1_TFBS_HSA|FBsf0000365120)
FBtr0306624	3L_14199524_SNP	A	G	0.05988	10	157	3.42e-05	3.21e-05	0.79905	3L_14199524_SNP	G	SiteClass[FBgn0013718|nuf|INTRON|0],TranscriptAnnot[INTRON(MODIFIER||||502|nuf|protein_coding|CODING|FBtr0100039|4|1);INTRON(MODIFIER||||502|nuf|protein_coding|CODING|FBtr0100040|4|1);INTRON(MODIFIER||||515|nuf|protein_coding|CODING|FBtr0306624|4|1);INTRON(MODIFIER||||530|nuf|protein_coding|CODING|FBtr0306619|5|1);INTRON(MODIFIER||||529|nuf|protein_coding|CODING|FBtr0306620|5|1);INTRON(MODIFIER||…	(TF_binding_site|BDTNP1_TFBS_dl|FBsf0000307411);(TF_binding_site|BDTNP1_TFBS_hb|FBsf0000291415);(TF_binding_site|BDTNP1_TFBS_twi|FBsf0000203782);(TF_binding_site|mE1_TFBS_HSA|FBsf0000365120)
FBtr0306619	3L_14199524_SNP	A	G	0.05988	10	157	3.42e-05	3.21e-05	0.79905	3L_14199524_SNP	G	SiteClass[FBgn0013718|nuf|INTRON|0],TranscriptAnnot[INTRON(MODIFIER||||502|nuf|protein_coding|CODING|FBtr0100039|4|1);INTRON(MODIFIER||||502|nuf|protein_coding|CODING|FBtr0100040|4|1);INTRON(MODIFIER||||515|nuf|protein_coding|CODING|FBtr0306624|4|1);INTRON(MODIFIER||||530|nuf|protein_coding|CODING|FBtr0306619|5|1);INTRON(MODIFIER||||529|nuf|protein_coding|CODING|FBtr0306620|5|1);INTRON(MODIFIER||…	(TF_binding_site|BDTNP1_TFBS_dl|FBsf0000307411);(TF_binding_site|BDTNP1_TFBS_hb|FBsf0000291415);(TF_binding_site|BDTNP1_TFBS_twi|FBsf0000203782);(TF_binding_site|mE1_TFBS_HSA|FBsf0000365120)
FBtr0306620	3L_14199524_SNP	A	G	0.05988	10	157	3.42e-05	3.21e-05	0.79905	3L_14199524_SNP	G	SiteClass[FBgn0013718|nuf|INTRON|0],TranscriptAnnot[INTRON(MODIFIER||||502|nuf|protein_coding|CODING|FBtr0100039|4|1);INTRON(MODIFIER||||502|nuf|protein_coding|CODING|FBtr0100040|4|1);INTRON(MODIFIER||||515|nuf|protein_coding|CODING|FBtr0306624|4|1);INTRON(MODIFIER||||530|nuf|protein_coding|CODING|FBtr0306619|5|1);INTRON(MODIFIER||||529|nuf|protein_coding|CODING|FBtr0306620|5|1);INTRON(MODIFIER||…	(TF_binding_site|BDTNP1_TFBS_dl|FBsf0000307411);(TF_binding_site|BDTNP1_TFBS_hb|FBsf0000291415);(TF_binding_site|BDTNP1_TFBS_twi|FBsf0000203782);(TF_binding_site|mE1_TFBS_HSA|FBsf0000365120)
FBtr0307191	3L_14199524_SNP	A	G	0.05988	10	157	3.42e-05	3.21e-05	0.79905	3L_14199524_SNP	G	SiteClass[FBgn0013718|nuf|INTRON|0],TranscriptAnnot[INTRON(MODIFIER||||502|nuf|protein_coding|CODING|FBtr0100039|4|1);INTRON(MODIFIER||||502|nuf|protein_coding|CODING|FBtr0100040|4|1);INTRON(MODIFIER||||515|nuf|protein_coding|CODING|FBtr0306624|4|1);INTRON(MODIFIER||||530|nuf|protein_coding|CODING|FBtr0306619|5|1);INTRON(MODIFIER||||529|nuf|protein_coding|CODING|FBtr0306620|5|1);INTRON(MODIFIER||…	(TF_binding_site|BDTNP1_TFBS_dl|FBsf0000307411);(TF_binding_site|BDTNP1_TFBS_hb|FBsf0000291415);(TF_binding_site|BDTNP1_TFBS_twi|FBsf0000203782);(TF_binding_site|mE1_TFBS_HSA|FBsf0000365120)
FBtr0100042	3L_14199524_SNP	A	G	0.05988	10	157	3.42e-05	3.21e-05	0.79905	3L_14199524_SNP	G	SiteClass[FBgn0013718|nuf|INTRON|0],TranscriptAnnot[INTRON(MODIFIER||||502|nuf|protein_coding|CODING|FBtr0100039|4|1);INTRON(MODIFIER||||502|nuf|protein_coding|CODING|FBtr0100040|4|1);INTRON(MODIFIER||||515|nuf|protein_coding|CODING|FBtr0306624|4|1);INTRON(MODIFIER||||530|nuf|protein_coding|CODING|FBtr0306619|5|1);INTRON(MODIFIER||||529|nuf|protein_coding|CODING|FBtr0306620|5|1);INTRON(MODIFIER||…	(TF_binding_site|BDTNP1_TFBS_dl|FBsf0000307411);(TF_binding_site|BDTNP1_TFBS_hb|FBsf0000291415);(TF_binding_site|BDTNP1_TFBS_twi|FBsf0000203782);(TF_binding_site|mE1_TFBS_HSA|FBsf0000365120)
FBgn0035533	3L_4338219_SNP	G	A	0.5	87	87	2.79e-05	3.28e-05	0.79905	3L_4338219_SNP	A	SiteClass[FBgn0035533|Cip4|INTRON|0],TranscriptAnnot[INTRON(MODIFIER||||628|Cip4|protein_coding|CODING|FBtr0306533|1|1);INTRON(MODIFIER||||631|Cip4|protein_coding|CODING|FBtr0073339|2|1);INTRON(MODIFIER||||665|Cip4|protein_coding|CODING|FBtr0113138|2|1);INTRON(MODIFIER||||612|Cip4|protein_coding|CODING|FBtr0306094|2|1);INTRON(MODIFIER||||646|Cip4|protein_coding|CODING|FBtr0306095|2|1);INTRON(MODI…	(TF_binding_site|mE1_TFBS_inv|FBsf0000235745)	FBgn0035533	The gene Cdc42-interacting protein 4 is referred to in FlyBase by the symbol Dmel\Cip4 (CG15015, FBgn0035533). It is a protein_coding_gene from Drosophila melanogaster. It has 11 annotated transcripts and 11 polypeptides (10 unique). Gene sequence location is 3L:4322491..4364102. It has the cytological map location 64B1-64B2. Protein features are: F-BAR domain; FCH domain; HR1 rho-binding repeat;…
FBtr0306533	3L_4338219_SNP	G	A	0.5	87	87	2.79e-05	3.28e-05	0.79905	3L_4338219_SNP	A	SiteClass[FBgn0035533|Cip4|INTRON|0],TranscriptAnnot[INTRON(MODIFIER||||628|Cip4|protein_coding|CODING|FBtr0306533|1|1);INTRON(MODIFIER||||631|Cip4|protein_coding|CODING|FBtr0073339|2|1);INTRON(MODIFIER||||665|Cip4|protein_coding|CODING|FBtr0113138|2|1);INTRON(MODIFIER||||612|Cip4|protein_coding|CODING|FBtr0306094|2|1);INTRON(MODIFIER||||646|Cip4|protein_coding|CODING|FBtr0306095|2|1);INTRON(MODI…	(TF_binding_site|mE1_TFBS_inv|FBsf0000235745)
FBtr0073339	3L_4338219_SNP	G	A	0.5	87	87	2.79e-05	3.28e-05	0.79905	3L_4338219_SNP	A	SiteClass[FBgn0035533|Cip4|INTRON|0],TranscriptAnnot[INTRON(MODIFIER||||628|Cip4|protein_coding|CODING|FBtr0306533|1|1);INTRON(MODIFIER||||631|Cip4|protein_coding|CODING|FBtr0073339|2|1);INTRON(MODIFIER||||665|Cip4|protein_coding|CODING|FBtr0113138|2|1);INTRON(MODIFIER||||612|Cip4|protein_coding|CODING|FBtr0306094|2|1);INTRON(MODIFIER||||646|Cip4|protein_coding|CODING|FBtr0306095|2|1);INTRON(MODI…	(TF_binding_site|mE1_TFBS_inv|FBsf0000235745)
FBtr0113138	3L_4338219_SNP	G	A	0.5	87	87	2.79e-05	3.28e-05	0.79905	3L_4338219_SNP	A	SiteClass[FBgn0035533|Cip4|INTRON|0],TranscriptAnnot[INTRON(MODIFIER||||628|Cip4|protein_coding|CODING|FBtr0306533|1|1);INTRON(MODIFIER||||631|Cip4|protein_coding|CODING|FBtr0073339|2|1);INTRON(MODIFIER||||665|Cip4|protein_coding|CODING|FBtr0113138|2|1);INTRON(MODIFIER||||612|Cip4|protein_coding|CODING|FBtr0306094|2|1);INTRON(MODIFIER||||646|Cip4|protein_coding|CODING|FBtr0306095|2|1);INTRON(MODI…	(TF_binding_site|mE1_TFBS_inv|FBsf0000235745)
FBtr0306094	3L_4338219_SNP	G	A	0.5	87	87	2.79e-05	3.28e-05	0.79905	3L_4338219_SNP	A	SiteClass[FBgn0035533|Cip4|INTRON|0],TranscriptAnnot[INTRON(MODIFIER||||628|Cip4|protein_coding|CODING|FBtr0306533|1|1);INTRON(MODIFIER||||631|Cip4|protein_coding|CODING|FBtr0073339|2|1);INTRON(MODIFIER||||665|Cip4|protein_coding|CODING|FBtr0113138|2|1);INTRON(MODIFIER||||612|Cip4|protein_coding|CODING|FBtr0306094|2|1);INTRON(MODIFIER||||646|Cip4|protein_coding|CODING|FBtr0306095|2|1);INTRON(MODI…	(TF_binding_site|mE1_TFBS_inv|FBsf0000235745)
FBtr0306095	3L_4338219_SNP	G	A	0.5	87	87	2.79e-05	3.28e-05	0.79905	3L_4338219_SNP	A	SiteClass[FBgn0035533|Cip4|INTRON|0],TranscriptAnnot[INTRON(MODIFIER||||628|Cip4|protein_coding|CODING|FBtr0306533|1|1);INTRON(MODIFIER||||631|Cip4|protein_coding|CODING|FBtr0073339|2|1);INTRON(MODIFIER||||665|Cip4|protein_coding|CODING|FBtr0113138|2|1);INTRON(MODIFIER||||612|Cip4|protein_coding|CODING|FBtr0306094|2|1);INTRON(MODIFIER||||646|Cip4|protein_coding|CODING|FBtr0306095|2|1);INTRON(MODI…	(TF_binding_site|mE1_TFBS_inv|FBsf0000235745)
FBtr0306096	3L_4338219_SNP	G	A	0.5	87	87	2.79e-05	3.28e-05	0.79905	3L_4338219_SNP	A	SiteClass[FBgn0035533|Cip4|INTRON|0],TranscriptAnnot[INTRON(MODIFIER||||628|Cip4|protein_coding|CODING|FBtr0306533|1|1);INTRON(MODIFIER||||631|Cip4|protein_coding|CODING|FBtr0073339|2|1);INTRON(MODIFIER||||665|Cip4|protein_coding|CODING|FBtr0113138|2|1);INTRON(MODIFIER||||612|Cip4|protein_coding|CODING|FBtr0306094|2|1);INTRON(MODIFIER||||646|Cip4|protein_coding|CODING|FBtr0306095|2|1);INTRON(MODI…	(TF_binding_site|mE1_TFBS_inv|FBsf0000235745)
FBtr0306534	3L_4338219_SNP	G	A	0.5	87	87	2.79e-05	3.28e-05	0.79905	3L_4338219_SNP	A	SiteClass[FBgn0035533|Cip4|INTRON|0],TranscriptAnnot[INTRON(MODIFIER||||628|Cip4|protein_coding|CODING|FBtr0306533|1|1);INTRON(MODIFIER||||631|Cip4|protein_coding|CODING|FBtr0073339|2|1);INTRON(MODIFIER||||665|Cip4|protein_coding|CODING|FBtr0113138|2|1);INTRON(MODIFIER||||612|Cip4|protein_coding|CODING|FBtr0306094|2|1);INTRON(MODIFIER||||646|Cip4|protein_coding|CODING|FBtr0306095|2|1);INTRON(MODI…	(TF_binding_site|mE1_TFBS_inv|FBsf0000235745)
FBtr0308201	3L_4338219_SNP	G	A	0.5	87	87	2.79e-05	3.28e-05	0.79905	3L_4338219_SNP	A	SiteClass[FBgn0035533|Cip4|INTRON|0],TranscriptAnnot[INTRON(MODIFIER||||628|Cip4|protein_coding|CODING|FBtr0306533|1|1);INTRON(MODIFIER||||631|Cip4|protein_coding|CODING|FBtr0073339|2|1);INTRON(MODIFIER||||665|Cip4|protein_coding|CODING|FBtr0113138|2|1);INTRON(MODIFIER||||612|Cip4|protein_coding|CODING|FBtr0306094|2|1);INTRON(MODIFIER||||646|Cip4|protein_coding|CODING|FBtr0306095|2|1);INTRON(MODI…	(TF_binding_site|mE1_TFBS_inv|FBsf0000235745)
FBtr0308202	3L_4338219_SNP	G	A	0.5	87	87	2.79e-05	3.28e-05	0.79905	3L_4338219_SNP	A	SiteClass[FBgn0035533|Cip4|INTRON|0],TranscriptAnnot[INTRON(MODIFIER||||628|Cip4|protein_coding|CODING|FBtr0306533|1|1);INTRON(MODIFIER||||631|Cip4|protein_coding|CODING|FBtr0073339|2|1);INTRON(MODIFIER||||665|Cip4|protein_coding|CODING|FBtr0113138|2|1);INTRON(MODIFIER||||612|Cip4|protein_coding|CODING|FBtr0306094|2|1);INTRON(MODIFIER||||646|Cip4|protein_coding|CODING|FBtr0306095|2|1);INTRON(MODI…	(TF_binding_site|mE1_TFBS_inv|FBsf0000235745)
FBtr0333570	3L_4338219_SNP	G	A	0.5	87	87	2.79e-05	3.28e-05	0.79905	3L_4338219_SNP	A	SiteClass[FBgn0035533|Cip4|INTRON|0],TranscriptAnnot[INTRON(MODIFIER||||628|Cip4|protein_coding|CODING|FBtr0306533|1|1);INTRON(MODIFIER||||631|Cip4|protein_coding|CODING|FBtr0073339|2|1);INTRON(MODIFIER||||665|Cip4|protein_coding|CODING|FBtr0113138|2|1);INTRON(MODIFIER||||612|Cip4|protein_coding|CODING|FBtr0306094|2|1);INTRON(MODIFIER||||646|Cip4|protein_coding|CODING|FBtr0306095|2|1);INTRON(MODI…	(TF_binding_site|mE1_TFBS_inv|FBsf0000235745)
FBtr0333571	3L_4338219_SNP	G	A	0.5	87	87	2.79e-05	3.28e-05	0.79905	3L_4338219_SNP	A	SiteClass[FBgn0035533|Cip4|INTRON|0],TranscriptAnnot[INTRON(MODIFIER||||628|Cip4|protein_coding|CODING|FBtr0306533|1|1);INTRON(MODIFIER||||631|Cip4|protein_coding|CODING|FBtr0073339|2|1);INTRON(MODIFIER||||665|Cip4|protein_coding|CODING|FBtr0113138|2|1);INTRON(MODIFIER||||612|Cip4|protein_coding|CODING|FBtr0306094|2|1);INTRON(MODIFIER||||646|Cip4|protein_coding|CODING|FBtr0306095|2|1);INTRON(MODI…	(TF_binding_site|mE1_TFBS_inv|FBsf0000235745)
FBgn0026376	3L_13908087_SNP	A	G	0.4046	70	103	3.01e-05	3.32e-05	0.79905	3L_13908087_SNP	G	SiteClass[FBgn0026376|Rgl|INTRON|0],TranscriptAnnot[INTRON(MODIFIER||||774|Rgl|protein_coding|CODING|FBtr0075794|2|1);INTRON(MODIFIER||||774|Rgl|protein_coding|CODING|FBtr0075795|2|1);INTRON(MODIFIER||||774|Rgl|protein_coding|CODING|FBtr0075796|2|1);INTRON(MODIFIER||||954|Rgl|protein_coding|CODING|FBtr0075793|1|1);INTRON(MODIFIER||||973|Rgl|protein_coding|CODING|FBtr0330186|1|1)]	-	FBgn0026376	The gene Ral guanine nucleotide dissociation stimulator-like ortholog (M. musculus) is referred to in FlyBase by the symbol Dmel\Rgl (CG8865, FBgn0026376). It is a protein_coding_gene from Drosophila melanogaster. It has 5 annotated transcripts and 5 polypeptides (3 unique). Gene sequence location is 3L:13906897..13925335. It has the cytological map location 70C5. Protein features are: Ras guanin…
FBtr0075794	3L_13908087_SNP	A	G	0.4046	70	103	3.01e-05	3.32e-05	0.79905	3L_13908087_SNP	G	SiteClass[FBgn0026376|Rgl|INTRON|0],TranscriptAnnot[INTRON(MODIFIER||||774|Rgl|protein_coding|CODING|FBtr0075794|2|1);INTRON(MODIFIER||||774|Rgl|protein_coding|CODING|FBtr0075795|2|1);INTRON(MODIFIER||||774|Rgl|protein_coding|CODING|FBtr0075796|2|1);INTRON(MODIFIER||||954|Rgl|protein_coding|CODING|FBtr0075793|1|1);INTRON(MODIFIER||||973|Rgl|protein_coding|CODING|FBtr0330186|1|1)]	-
FBtr0075795	3L_13908087_SNP	A	G	0.4046	70	103	3.01e-05	3.32e-05	0.79905	3L_13908087_SNP	G	SiteClass[FBgn0026376|Rgl|INTRON|0],TranscriptAnnot[INTRON(MODIFIER||||774|Rgl|protein_coding|CODING|FBtr0075794|2|1);INTRON(MODIFIER||||774|Rgl|protein_coding|CODING|FBtr0075795|2|1);INTRON(MODIFIER||||774|Rgl|protein_coding|CODING|FBtr0075796|2|1);INTRON(MODIFIER||||954|Rgl|protein_coding|CODING|FBtr0075793|1|1);INTRON(MODIFIER||||973|Rgl|protein_coding|CODING|FBtr0330186|1|1)]	-
FBtr0075796	3L_13908087_SNP	A	G	0.4046	70	103	3.01e-05	3.32e-05	0.79905	3L_13908087_SNP	G	SiteClass[FBgn0026376|Rgl|INTRON|0],TranscriptAnnot[INTRON(MODIFIER||||774|Rgl|protein_coding|CODING|FBtr0075794|2|1);INTRON(MODIFIER||||774|Rgl|protein_coding|CODING|FBtr0075795|2|1);INTRON(MODIFIER||||774|Rgl|protein_coding|CODING|FBtr0075796|2|1);INTRON(MODIFIER||||954|Rgl|protein_coding|CODING|FBtr0075793|1|1);INTRON(MODIFIER||||973|Rgl|protein_coding|CODING|FBtr0330186|1|1)]	-
FBtr0075793	3L_13908087_SNP	A	G	0.4046	70	103	3.01e-05	3.32e-05	0.79905	3L_13908087_SNP	G	SiteClass[FBgn0026376|Rgl|INTRON|0],TranscriptAnnot[INTRON(MODIFIER||||774|Rgl|protein_coding|CODING|FBtr0075794|2|1);INTRON(MODIFIER||||774|Rgl|protein_coding|CODING|FBtr0075795|2|1);INTRON(MODIFIER||||774|Rgl|protein_coding|CODING|FBtr0075796|2|1);INTRON(MODIFIER||||954|Rgl|protein_coding|CODING|FBtr0075793|1|1);INTRON(MODIFIER||||973|Rgl|protein_coding|CODING|FBtr0330186|1|1)]	-
FBtr0330186	3L_13908087_SNP	A	G	0.4046	70	103	3.01e-05	3.32e-05	0.79905	3L_13908087_SNP	G	SiteClass[FBgn0026376|Rgl|INTRON|0],TranscriptAnnot[INTRON(MODIFIER||||774|Rgl|protein_coding|CODING|FBtr0075794|2|1);INTRON(MODIFIER||||774|Rgl|protein_coding|CODING|FBtr0075795|2|1);INTRON(MODIFIER||||774|Rgl|protein_coding|CODING|FBtr0075796|2|1);INTRON(MODIFIER||||954|Rgl|protein_coding|CODING|FBtr0075793|1|1);INTRON(MODIFIER||||973|Rgl|protein_coding|CODING|FBtr0330186|1|1)]	-
FBgn0052187	3L_17798357_SNP	C	T	0.4819	80	86	4.51e-05	3.35e-05	0.79905	3L_17798357_SNP	C	SiteClass[FBgn0052187|CG32187|NON_SYNONYMOUS_CODING|0;FBgn0036754|CG5589|UPSTREAM|542],TranscriptAnnot[NON_SYNONYMOUS_CODING(MODERATE|MISSENSE|Gcg/Acg|A305T|409|CG32187|protein_coding|CODING|FBtr0075169|2|1);UPSTREAM(MODIFIER||542||594|CG5589|protein_coding|CODING|FBtr0075170||1)]	(TF_binding_site|mE1_TFBS_cad|FBsf0000245274);(TF_binding_site|mE1_TFBS_chinmo|FBsf0000210373)	FBgn0052187	This gene is referred to in FlyBase by the symbol Dmel\CG32187 (FBgn0052187). It is a protein_coding_gene from Drosophila melanogaster. It has one annotated transcript and one polypeptide. Gene sequence location is 3L:17804916..17806365. It has the cytological map location 75A2. Protein features are: Harbinger transposase-derived nuclease domain. Its molecular function is unknown. The biological …
FBgn0036754	3L_17798357_SNP	C	T	0.4819	80	86	4.51e-05	3.35e-05	0.79905	3L_17798357_SNP	C	SiteClass[FBgn0052187|CG32187|NON_SYNONYMOUS_CODING|0;FBgn0036754|CG5589|UPSTREAM|542],TranscriptAnnot[NON_SYNONYMOUS_CODING(MODERATE|MISSENSE|Gcg/Acg|A305T|409|CG32187|protein_coding|CODING|FBtr0075169|2|1);UPSTREAM(MODIFIER||542||594|CG5589|protein_coding|CODING|FBtr0075170||1)]	(TF_binding_site|mE1_TFBS_cad|FBsf0000245274);(TF_binding_site|mE1_TFBS_chinmo|FBsf0000210373)	FBgn0036754	This gene is referred to in FlyBase by the symbol Dmel\CG5589 (FBgn0036754). It is a protein_coding_gene from Drosophila melanogaster. It has one annotated transcript and one polypeptide. Gene sequence location is 3L:17802490..17804715. It has the cytological map location 75A2. Protein features are: ATP-dependent RNA helicase DEAD-box, conserved site; DEAD/DEAH box helicase domain; Helicase super…
FBtr0075169	3L_17798357_SNP	C	T	0.4819	80	86	4.51e-05	3.35e-05	0.79905	3L_17798357_SNP	C	SiteClass[FBgn0052187|CG32187|NON_SYNONYMOUS_CODING|0;FBgn0036754|CG5589|UPSTREAM|542],TranscriptAnnot[NON_SYNONYMOUS_CODING(MODERATE|MISSENSE|Gcg/Acg|A305T|409|CG32187|protein_coding|CODING|FBtr0075169|2|1);UPSTREAM(MODIFIER||542||594|CG5589|protein_coding|CODING|FBtr0075170||1)]	(TF_binding_site|mE1_TFBS_cad|FBsf0000245274);(TF_binding_site|mE1_TFBS_chinmo|FBsf0000210373)
FBtr0075170	3L_17798357_SNP	C	T	0.4819	80	86	4.51e-05	3.35e-05	0.79905	3L_17798357_SNP	C	SiteClass[FBgn0052187|CG32187|NON_SYNONYMOUS_CODING|0;FBgn0036754|CG5589|UPSTREAM|542],TranscriptAnnot[NON_SYNONYMOUS_CODING(MODERATE|MISSENSE|Gcg/Acg|A305T|409|CG32187|protein_coding|CODING|FBtr0075169|2|1);UPSTREAM(MODIFIER||542||594|CG5589|protein_coding|CODING|FBtr0075170||1)]	(TF_binding_site|mE1_TFBS_cad|FBsf0000245274);(TF_binding_site|mE1_TFBS_chinmo|FBsf0000210373)
FBgn0036777	3L_18110792_SNP	C	T	0.3988	67	101	3.34e-05	3.35e-05	0.79905	3L_18110792_SNP	C	SiteClass[FBgn0036777|CG7341|INTRON|0;FBgn0052195|CG32195|UTR_3_PRIME|0],TranscriptAnnot[UTR_3_PRIME(MODIFIER||1932||401|CG32195|protein_coding|CODING|FBtr0075125|4|1);INTRON(MODIFIER||||357|CG7341|protein_coding|CODING|FBtr0075124|1|1);INTRON(MODIFIER||||357|CG7341|protein_coding|CODING|FBtr0075123|1|1)]	-	FBgn0036777	This gene is referred to in FlyBase by the symbol Dmel\CG7341 (FBgn0036777). It is a protein_coding_gene from Drosophila melanogaster. It has 2 annotated transcripts and 2 polypeptides (1 unique). Gene sequence location is 3L:18112959..18121003. It has the cytological map location 75B10. Its molecular function is unknown. The biological processes in which it is involved are not known. 7 alleles a…
FBgn0052195	3L_18110792_SNP	C	T	0.3988	67	101	3.34e-05	3.35e-05	0.79905	3L_18110792_SNP	C	SiteClass[FBgn0036777|CG7341|INTRON|0;FBgn0052195|CG32195|UTR_3_PRIME|0],TranscriptAnnot[UTR_3_PRIME(MODIFIER||1932||401|CG32195|protein_coding|CODING|FBtr0075125|4|1);INTRON(MODIFIER||||357|CG7341|protein_coding|CODING|FBtr0075124|1|1);INTRON(MODIFIER||||357|CG7341|protein_coding|CODING|FBtr0075123|1|1)]	-	FBgn0052195	This gene is referred to in FlyBase by the symbol Dmel\CG32195 (FBgn0052195). It is a protein_coding_gene from Drosophila melanogaster. It has 3 annotated transcripts and 3 polypeptides (1 unique). Gene sequence location is 3L:18112959..18119150. It has the cytological map location 75B10. Protein features are: CHK kinase-like; Protein kinase-like domain; Protein of unknown function DUF227. Its mo…
FBtr0075125	3L_18110792_SNP	C	T	0.3988	67	101	3.34e-05	3.35e-05	0.79905	3L_18110792_SNP	C	SiteClass[FBgn0036777|CG7341|INTRON|0;FBgn0052195|CG32195|UTR_3_PRIME|0],TranscriptAnnot[UTR_3_PRIME(MODIFIER||1932||401|CG32195|protein_coding|CODING|FBtr0075125|4|1);INTRON(MODIFIER||||357|CG7341|protein_coding|CODING|FBtr0075124|1|1);INTRON(MODIFIER||||357|CG7341|protein_coding|CODING|FBtr0075123|1|1)]	-
FBtr0075124	3L_18110792_SNP	C	T	0.3988	67	101	3.34e-05	3.35e-05	0.79905	3L_18110792_SNP	C	SiteClass[FBgn0036777|CG7341|INTRON|0;FBgn0052195|CG32195|UTR_3_PRIME|0],TranscriptAnnot[UTR_3_PRIME(MODIFIER||1932||401|CG32195|protein_coding|CODING|FBtr0075125|4|1);INTRON(MODIFIER||||357|CG7341|protein_coding|CODING|FBtr0075124|1|1);INTRON(MODIFIER||||357|CG7341|protein_coding|CODING|FBtr0075123|1|1)]	-
FBtr0075123	3L_18110792_SNP	C	T	0.3988	67	101	3.34e-05	3.35e-05	0.79905	3L_18110792_SNP	C	SiteClass[FBgn0036777|CG7341|INTRON|0;FBgn0052195|CG32195|UTR_3_PRIME|0],TranscriptAnnot[UTR_3_PRIME(MODIFIER||1932||401|CG32195|protein_coding|CODING|FBtr0075125|4|1);INTRON(MODIFIER||||357|CG7341|protein_coding|CODING|FBtr0075124|1|1);INTRON(MODIFIER||||357|CG7341|protein_coding|CODING|FBtr0075123|1|1)]	-
FBgn0004102	X_8533203_SNP	G	T	0.1257	22	153	2.19e-05	3.39e-05	0.79905	X_8533203_SNP	G	SiteClass[FBgn0004102|oc|INTRON|0],TranscriptAnnot[INTRON(MODIFIER||||542|oc|protein_coding|CODING|FBtr0300106|3|1);INTRON(MODIFIER||||542|oc|protein_coding|CODING|FBtr0331305|3|1);INTRON(MODIFIER||||539|oc|protein_coding|CODING|FBtr0331306|3|1);INTRON(MODIFIER||||548|oc|protein_coding|CODING|FBtr0331737|3|1);INTRON(MODIFIER||||542|oc|protein_coding|CODING|FBtr0331738|3|1)]	(regulatory_region|REDfly_CRMs|FBsf0000435482);(TF_binding_site|BDTNP1_TFBS_da|FBsf0000332134);(TF_binding_site|mE1_TFBS_HSA|FBsf0000380678);(TF_binding_site|mE1_TFBS_sens|FBsf0000220205)	FBgn0004102	The gene ocelliless is referred to in FlyBase by the symbol Dmel\oc (CG12154, FBgn0004102). It is a protein_coding_gene from Drosophila melanogaster. It has 5 annotated transcripts and 5 polypeptides (3 unique). Gene sequence location is X:8630159..8650681. It has the cytological map location 7F10-8A1. Protein features are: Homeobox domain; Homeobox, conserved site; Homeodomain-like. Its molecula…
FBtr0300106	X_8533203_SNP	G	T	0.1257	22	153	2.19e-05	3.39e-05	0.79905	X_8533203_SNP	G	SiteClass[FBgn0004102|oc|INTRON|0],TranscriptAnnot[INTRON(MODIFIER||||542|oc|protein_coding|CODING|FBtr0300106|3|1);INTRON(MODIFIER||||542|oc|protein_coding|CODING|FBtr0331305|3|1);INTRON(MODIFIER||||539|oc|protein_coding|CODING|FBtr0331306|3|1);INTRON(MODIFIER||||548|oc|protein_coding|CODING|FBtr0331737|3|1);INTRON(MODIFIER||||542|oc|protein_coding|CODING|FBtr0331738|3|1)]	(regulatory_region|REDfly_CRMs|FBsf0000435482);(TF_binding_site|BDTNP1_TFBS_da|FBsf0000332134);(TF_binding_site|mE1_TFBS_HSA|FBsf0000380678);(TF_binding_site|mE1_TFBS_sens|FBsf0000220205)
FBtr0331305	X_8533203_SNP	G	T	0.1257	22	153	2.19e-05	3.39e-05	0.79905	X_8533203_SNP	G	SiteClass[FBgn0004102|oc|INTRON|0],TranscriptAnnot[INTRON(MODIFIER||||542|oc|protein_coding|CODING|FBtr0300106|3|1);INTRON(MODIFIER||||542|oc|protein_coding|CODING|FBtr0331305|3|1);INTRON(MODIFIER||||539|oc|protein_coding|CODING|FBtr0331306|3|1);INTRON(MODIFIER||||548|oc|protein_coding|CODING|FBtr0331737|3|1);INTRON(MODIFIER||||542|oc|protein_coding|CODING|FBtr0331738|3|1)]	(regulatory_region|REDfly_CRMs|FBsf0000435482);(TF_binding_site|BDTNP1_TFBS_da|FBsf0000332134);(TF_binding_site|mE1_TFBS_HSA|FBsf0000380678);(TF_binding_site|mE1_TFBS_sens|FBsf0000220205)
FBtr0331306	X_8533203_SNP	G	T	0.1257	22	153	2.19e-05	3.39e-05	0.79905	X_8533203_SNP	G	SiteClass[FBgn0004102|oc|INTRON|0],TranscriptAnnot[INTRON(MODIFIER||||542|oc|protein_coding|CODING|FBtr0300106|3|1);INTRON(MODIFIER||||542|oc|protein_coding|CODING|FBtr0331305|3|1);INTRON(MODIFIER||||539|oc|protein_coding|CODING|FBtr0331306|3|1);INTRON(MODIFIER||||548|oc|protein_coding|CODING|FBtr0331737|3|1);INTRON(MODIFIER||||542|oc|protein_coding|CODING|FBtr0331738|3|1)]	(regulatory_region|REDfly_CRMs|FBsf0000435482);(TF_binding_site|BDTNP1_TFBS_da|FBsf0000332134);(TF_binding_site|mE1_TFBS_HSA|FBsf0000380678);(TF_binding_site|mE1_TFBS_sens|FBsf0000220205)
FBtr0331737	X_8533203_SNP	G	T	0.1257	22	153	2.19e-05	3.39e-05	0.79905	X_8533203_SNP	G	SiteClass[FBgn0004102|oc|INTRON|0],TranscriptAnnot[INTRON(MODIFIER||||542|oc|protein_coding|CODING|FBtr0300106|3|1);INTRON(MODIFIER||||542|oc|protein_coding|CODING|FBtr0331305|3|1);INTRON(MODIFIER||||539|oc|protein_coding|CODING|FBtr0331306|3|1);INTRON(MODIFIER||||548|oc|protein_coding|CODING|FBtr0331737|3|1);INTRON(MODIFIER||||542|oc|protein_coding|CODING|FBtr0331738|3|1)]	(regulatory_region|REDfly_CRMs|FBsf0000435482);(TF_binding_site|BDTNP1_TFBS_da|FBsf0000332134);(TF_binding_site|mE1_TFBS_HSA|FBsf0000380678);(TF_binding_site|mE1_TFBS_sens|FBsf0000220205)
FBtr0331738	X_8533203_SNP	G	T	0.1257	22	153	2.19e-05	3.39e-05	0.79905	X_8533203_SNP	G	SiteClass[FBgn0004102|oc|INTRON|0],TranscriptAnnot[INTRON(MODIFIER||||542|oc|protein_coding|CODING|FBtr0300106|3|1);INTRON(MODIFIER||||542|oc|protein_coding|CODING|FBtr0331305|3|1);INTRON(MODIFIER||||539|oc|protein_coding|CODING|FBtr0331306|3|1);INTRON(MODIFIER||||548|oc|protein_coding|CODING|FBtr0331737|3|1);INTRON(MODIFIER||||542|oc|protein_coding|CODING|FBtr0331738|3|1)]	(regulatory_region|REDfly_CRMs|FBsf0000435482);(TF_binding_site|BDTNP1_TFBS_da|FBsf0000332134);(TF_binding_site|mE1_TFBS_HSA|FBsf0000380678);(TF_binding_site|mE1_TFBS_sens|FBsf0000220205)
FBgn0085280	3L_17671510_SNP	T	G	0.0678	12	165	3.57e-05	3.41e-05	0.79905	3L_17671510_SNP	G	SiteClass[FBgn0085280|CG34251|INTRON|0],TranscriptAnnot[INTRON(MODIFIER||||185|CG34251|protein_coding|CODING|FBtr0112445|3|1);INTRON(MODIFIER||||185|CG34251|protein_coding|CODING|FBtr0301012|3|1)]	-	FBgn0085280	This	gene	is	referred	to	in	FlyBase	by	the	symbol	Dmel\CG34251	(FBgn0085280).	It	is	a	protein_coding_gene	from	Drosophila	melanogaster.	It	has	2	annotated	transcripts	and	2	polypeptides	(1	unique).	Gene	sequence	location	is	3L:17671622..17683581.	It
FBtr0112445	3L_17671510_SNP	T	G	0.0678	12	165	3.57e-05	3.41e-05	0.79905	3L_17671510_SNP	G	SiteClass[FBgn0085280|CG34251|INTRON|0],TranscriptAnnot[INTRON(MODIFIER||||185|CG34251|protein_coding|CODING|FBtr0112445|3|1);INTRON(MODIFIER||||185|CG34251|protein_coding|CODING|FBtr0301012|3|1)]	-
FBtr0301012	3L_17671510_SNP	T	G	0.0678	12	165	3.57e-05	3.41e-05	0.79905	3L_17671510_SNP	G	SiteClass[FBgn0085280|CG34251|INTRON|0],TranscriptAnnot[INTRON(MODIFIER||||185|CG34251|protein_coding|CODING|FBtr0112445|3|1);INTRON(MODIFIER||||185|CG34251|protein_coding|CODING|FBtr0301012|3|1)]	-
FBgn0037672	3R_5089243_SNP	T	G	0.07471	13	161	4.01e-05	3.54e-05	0.79905	3R_5089243_SNP	G	SiteClass[FBgn0037672|sage|SYNONYMOUS_CODING|0;FBgn0037671|VhaM8.9|DOWNSTREAM|931],TranscriptAnnot[SYNONYMOUS_CODING(LOW|SILENT|ggC/ggA|G74|268|sage|protein_coding|CODING|FBtr0081982|1|1);SYNONYMOUS_CODING(LOW|SILENT|ggC/ggA|G74|268|sage|protein_coding|CODING|FBtr0346321|1|1);DOWNSTREAM(MODIFIER||931||320|VhaM8.9|protein_coding|CODING|FBtr0081978||1)]	(TF_binding_site|mE1_TFBS_chinmo|FBsf0000212377);(TF_binding_site|mE1_TFBS_inv|FBsf0000237064)	FBgn0037672	The gene salivary gland-expressed bHLH is referred to in FlyBase by the symbol Dmel\sage (CG12952, FBgn0037672). It is a protein_coding_gene from Drosophila melanogaster. It has 2 annotated transcripts and 2 polypeptides (1 unique). Gene sequence location is 3R:9262654..9264142. It has the cytological map location 85D7. Protein features are: Myc-type, basic helix-loop-helix (bHLH) domain. Its mol…
FBgn0037671	3R_5089243_SNP	T	G	0.07471	13	161	4.01e-05	3.54e-05	0.79905	3R_5089243_SNP	G	SiteClass[FBgn0037672|sage|SYNONYMOUS_CODING|0;FBgn0037671|VhaM8.9|DOWNSTREAM|931],TranscriptAnnot[SYNONYMOUS_CODING(LOW|SILENT|ggC/ggA|G74|268|sage|protein_coding|CODING|FBtr0081982|1|1);SYNONYMOUS_CODING(LOW|SILENT|ggC/ggA|G74|268|sage|protein_coding|CODING|FBtr0346321|1|1);DOWNSTREAM(MODIFIER||931||320|VhaM8.9|protein_coding|CODING|FBtr0081978||1)]	(TF_binding_site|mE1_TFBS_chinmo|FBsf0000212377);(TF_binding_site|mE1_TFBS_inv|FBsf0000237064)	FBgn0037671	The gene Vacuolar H<sup>+</sup> ATPase M8.9 accessory subunit is referred to in FlyBase by the symbol Dmel\VhaM8.9 (CG8444, FBgn0037671). It is a protein_coding_gene from Drosophila melanogaster. It has one annotated transcript and one polypeptide. Gene sequence location is 3R:9260638..9262590. It has the cytological map location 85D6-85D7. Protein features are: Renin receptor-like. Its molecular…
FBtr0081982	3R_5089243_SNP	T	G	0.07471	13	161	4.01e-05	3.54e-05	0.79905	3R_5089243_SNP	G	SiteClass[FBgn0037672|sage|SYNONYMOUS_CODING|0;FBgn0037671|VhaM8.9|DOWNSTREAM|931],TranscriptAnnot[SYNONYMOUS_CODING(LOW|SILENT|ggC/ggA|G74|268|sage|protein_coding|CODING|FBtr0081982|1|1);SYNONYMOUS_CODING(LOW|SILENT|ggC/ggA|G74|268|sage|protein_coding|CODING|FBtr0346321|1|1);DOWNSTREAM(MODIFIER||931||320|VhaM8.9|protein_coding|CODING|FBtr0081978||1)]	(TF_binding_site|mE1_TFBS_chinmo|FBsf0000212377);(TF_binding_site|mE1_TFBS_inv|FBsf0000237064)
FBtr0346321	3R_5089243_SNP	T	G	0.07471	13	161	4.01e-05	3.54e-05	0.79905	3R_5089243_SNP	G	SiteClass[FBgn0037672|sage|SYNONYMOUS_CODING|0;FBgn0037671|VhaM8.9|DOWNSTREAM|931],TranscriptAnnot[SYNONYMOUS_CODING(LOW|SILENT|ggC/ggA|G74|268|sage|protein_coding|CODING|FBtr0081982|1|1);SYNONYMOUS_CODING(LOW|SILENT|ggC/ggA|G74|268|sage|protein_coding|CODING|FBtr0346321|1|1);DOWNSTREAM(MODIFIER||931||320|VhaM8.9|protein_coding|CODING|FBtr0081978||1)]	(TF_binding_site|mE1_TFBS_chinmo|FBsf0000212377);(TF_binding_site|mE1_TFBS_inv|FBsf0000237064)
FBtr0081978	3R_5089243_SNP	T	G	0.07471	13	161	4.01e-05	3.54e-05	0.79905	3R_5089243_SNP	G	SiteClass[FBgn0037672|sage|SYNONYMOUS_CODING|0;FBgn0037671|VhaM8.9|DOWNSTREAM|931],TranscriptAnnot[SYNONYMOUS_CODING(LOW|SILENT|ggC/ggA|G74|268|sage|protein_coding|CODING|FBtr0081982|1|1);SYNONYMOUS_CODING(LOW|SILENT|ggC/ggA|G74|268|sage|protein_coding|CODING|FBtr0346321|1|1);DOWNSTREAM(MODIFIER||931||320|VhaM8.9|protein_coding|CODING|FBtr0081978||1)]	(TF_binding_site|mE1_TFBS_chinmo|FBsf0000212377);(TF_binding_site|mE1_TFBS_inv|FBsf0000237064)
FBgn0085280	3L_17670908_SNP	T	C	0.05714	10	165	3.73e-05	3.6e-05	0.79905	3L_17670908_SNP	C	SiteClass[FBgn0085280|CG34251|INTRON|0],TranscriptAnnot[INTRON(MODIFIER||||185|CG34251|protein_coding|CODING|FBtr0112445|3|1);INTRON(MODIFIER||||185|CG34251|protein_coding|CODING|FBtr0301012|3|1)]	-	FBgn0085280	This	gene	is	referred	to	in	FlyBase	by	the	symbol	Dmel\CG34251	(FBgn0085280).	It	is	a	protein_coding_gene	from	Drosophila	melanogaster.	It	has	2	annotated	transcripts	and	2	polypeptides	(1	unique).	Gene	sequence	location	is	3L:17671622..17683581.	It
FBtr0112445	3L_17670908_SNP	T	C	0.05714	10	165	3.73e-05	3.6e-05	0.79905	3L_17670908_SNP	C	SiteClass[FBgn0085280|CG34251|INTRON|0],TranscriptAnnot[INTRON(MODIFIER||||185|CG34251|protein_coding|CODING|FBtr0112445|3|1);INTRON(MODIFIER||||185|CG34251|protein_coding|CODING|FBtr0301012|3|1)]	-
FBtr0301012	3L_17670908_SNP	T	C	0.05714	10	165	3.73e-05	3.6e-05	0.79905	3L_17670908_SNP	C	SiteClass[FBgn0085280|CG34251|INTRON|0],TranscriptAnnot[INTRON(MODIFIER||||185|CG34251|protein_coding|CODING|FBtr0112445|3|1);INTRON(MODIFIER||||185|CG34251|protein_coding|CODING|FBtr0301012|3|1)]	-
FBgn0266429	X_3481016_SNP	T	C	0.1635	26	133	5.14e-05	3.6e-05	0.79905	X_3481016_SNP	C	SiteClass[FBgn0266429|AstA-R1|INTRON|0],TranscriptAnnot[INTRON(MODIFIER||||394|AstA-R1|protein_coding|CODING|FBtr0070575|1|1);INTRON(MODIFIER||||394|AstA-R1|protein_coding|CODING|FBtr0333798|1|1)]	-	FBgn0266429	The gene Allatostatin A receptor 1 is referred to in FlyBase by the symbol Dmel\AstA-R1 (CG2872, FBgn0266429). It is a protein_coding_gene from Drosophila melanogaster. It has 2 annotated transcripts and 2 polypeptides (1 unique). Gene sequence location is X:3574536..3666724. It has the cytological map location 3D6-3E2. Protein features are: G protein-coupled receptor, rhodopsin-like; GPCR, rhodo…
FBtr0070575	X_3481016_SNP	T	C	0.1635	26	133	5.14e-05	3.6e-05	0.79905	X_3481016_SNP	C	SiteClass[FBgn0266429|AstA-R1|INTRON|0],TranscriptAnnot[INTRON(MODIFIER||||394|AstA-R1|protein_coding|CODING|FBtr0070575|1|1);INTRON(MODIFIER||||394|AstA-R1|protein_coding|CODING|FBtr0333798|1|1)]	-
FBtr0333798	X_3481016_SNP	T	C	0.1635	26	133	5.14e-05	3.6e-05	0.79905	X_3481016_SNP	C	SiteClass[FBgn0266429|AstA-R1|INTRON|0],TranscriptAnnot[INTRON(MODIFIER||||394|AstA-R1|protein_coding|CODING|FBtr0070575|1|1);INTRON(MODIFIER||||394|AstA-R1|protein_coding|CODING|FBtr0333798|1|1)]	-
FBgn0037910	3R_7381054_SNP	A	G	0.2048	34	132	5.14e-05	3.64e-05	0.79905	3R_7381054_SNP	A	SiteClass[FBgn0037910|CG14708|DOWNSTREAM|463],TranscriptAnnot[DOWNSTREAM(MODIFIER||463||205|CG14708|protein_coding|CODING|FBtr0082409||1);INTERGENIC(MODIFIER||||||||||1)]	-	FBgn0037910	This	gene	is	referred	to	in	FlyBase	by	the	symbol	Dmel\CG14708	(FBgn0037910).	It	is	a	protein_coding_gene	from	Drosophila	melanogaster.	It	has	one	annotated	transcript	and	one	polypeptide.	Gene	sequence	location	is	3R:11554145..11554869.	It	has	the
FBtr0082409	3R_7381054_SNP	A	G	0.2048	34	132	5.14e-05	3.64e-05	0.79905	3R_7381054_SNP	A	SiteClass[FBgn0037910|CG14708|DOWNSTREAM|463],TranscriptAnnot[DOWNSTREAM(MODIFIER||463||205|CG14708|protein_coding|CODING|FBtr0082409||1);INTERGENIC(MODIFIER||||||||||1)]	-
FBgn0034552	2R_16737497_SNP	A	G	0.1034	18	156	4.25e-05	3.67e-05	0.79905	2R_16737497_SNP	G	SiteClass[FBgn0034552|CG17999|UPSTREAM|53;FBgn0034553|CG9993|DOWNSTREAM|154],TranscriptAnnot[UPSTREAM(MODIFIER||53||545|CG17999|protein_coding|CODING|FBtr0071561||1);DOWNSTREAM(MODIFIER||154||543|CG9993|protein_coding|CODING|FBtr0071560||1);INTERGENIC(MODIFIER||||||||||1)]	(TF_binding_site|mE1_TFBS_cad|FBsf0000247114);(TF_binding_site|mE1_TFBS_chinmo|FBsf0000211668)	FBgn0034552	This gene is referred to in FlyBase by the symbol Dmel\CG17999 (FBgn0034552). It is a protein_coding_gene from Drosophila melanogaster. It has one annotated transcript and one polypeptide. Gene sequence location is 2R:20847980..20849939. It has the cytological map location 57B3. Protein features are: AMP-binding enzyme C-terminal domain; AMP-binding, conserved site; AMP-dependent synthetase/ligas…
FBgn0034553	2R_16737497_SNP	A	G	0.1034	18	156	4.25e-05	3.67e-05	0.79905	2R_16737497_SNP	G	SiteClass[FBgn0034552|CG17999|UPSTREAM|53;FBgn0034553|CG9993|DOWNSTREAM|154],TranscriptAnnot[UPSTREAM(MODIFIER||53||545|CG17999|protein_coding|CODING|FBtr0071561||1);DOWNSTREAM(MODIFIER||154||543|CG9993|protein_coding|CODING|FBtr0071560||1);INTERGENIC(MODIFIER||||||||||1)]	(TF_binding_site|mE1_TFBS_cad|FBsf0000247114);(TF_binding_site|mE1_TFBS_chinmo|FBsf0000211668)	FBgn0034553	This gene is referred to in FlyBase by the symbol Dmel\CG9993 (FBgn0034553). It is a protein_coding_gene from Drosophila melanogaster. It has one annotated transcript and one polypeptide. Gene sequence location is 2R:20850146..20852125. It has the cytological map location 57B3. Protein features are: AMP-binding enzyme C-terminal domain; AMP-dependent synthetase/ligase. Its molecular function is d…
FBtr0071561	2R_16737497_SNP	A	G	0.1034	18	156	4.25e-05	3.67e-05	0.79905	2R_16737497_SNP	G	SiteClass[FBgn0034552|CG17999|UPSTREAM|53;FBgn0034553|CG9993|DOWNSTREAM|154],TranscriptAnnot[UPSTREAM(MODIFIER||53||545|CG17999|protein_coding|CODING|FBtr0071561||1);DOWNSTREAM(MODIFIER||154||543|CG9993|protein_coding|CODING|FBtr0071560||1);INTERGENIC(MODIFIER||||||||||1)]	(TF_binding_site|mE1_TFBS_cad|FBsf0000247114);(TF_binding_site|mE1_TFBS_chinmo|FBsf0000211668)
FBtr0071560	2R_16737497_SNP	A	G	0.1034	18	156	4.25e-05	3.67e-05	0.79905	2R_16737497_SNP	G	SiteClass[FBgn0034552|CG17999|UPSTREAM|53;FBgn0034553|CG9993|DOWNSTREAM|154],TranscriptAnnot[UPSTREAM(MODIFIER||53||545|CG17999|protein_coding|CODING|FBtr0071561||1);DOWNSTREAM(MODIFIER||154||543|CG9993|protein_coding|CODING|FBtr0071560||1);INTERGENIC(MODIFIER||||||||||1)]	(TF_binding_site|mE1_TFBS_cad|FBsf0000247114);(TF_binding_site|mE1_TFBS_chinmo|FBsf0000211668)
FBgn0052187	3L_17798178_SNP	A	T	0.2831	47	119	4.3e-05	3.68e-05	0.79905	3L_17798178_SNP	T	SiteClass[FBgn0052187|CG32187|SYNONYMOUS_CODING|0;FBgn0036754|CG5589|UPSTREAM|363],TranscriptAnnot[SYNONYMOUS_CODING(LOW|SILENT|ggA/ggT|G364|409|CG32187|protein_coding|CODING|FBtr0075169|2|1);UPSTREAM(MODIFIER||363||594|CG5589|protein_coding|CODING|FBtr0075170||1)]	(TF_binding_site|mE1_TFBS_cad|FBsf0000245274);(TF_binding_site|mE1_TFBS_chinmo|FBsf0000210373)	FBgn0052187	This gene is referred to in FlyBase by the symbol Dmel\CG32187 (FBgn0052187). It is a protein_coding_gene from Drosophila melanogaster. It has one annotated transcript and one polypeptide. Gene sequence location is 3L:17804916..17806365. It has the cytological map location 75A2. Protein features are: Harbinger transposase-derived nuclease domain. Its molecular function is unknown. The biological …
FBgn0036754	3L_17798178_SNP	A	T	0.2831	47	119	4.3e-05	3.68e-05	0.79905	3L_17798178_SNP	T	SiteClass[FBgn0052187|CG32187|SYNONYMOUS_CODING|0;FBgn0036754|CG5589|UPSTREAM|363],TranscriptAnnot[SYNONYMOUS_CODING(LOW|SILENT|ggA/ggT|G364|409|CG32187|protein_coding|CODING|FBtr0075169|2|1);UPSTREAM(MODIFIER||363||594|CG5589|protein_coding|CODING|FBtr0075170||1)]	(TF_binding_site|mE1_TFBS_cad|FBsf0000245274);(TF_binding_site|mE1_TFBS_chinmo|FBsf0000210373)	FBgn0036754	This gene is referred to in FlyBase by the symbol Dmel\CG5589 (FBgn0036754). It is a protein_coding_gene from Drosophila melanogaster. It has one annotated transcript and one polypeptide. Gene sequence location is 3L:17802490..17804715. It has the cytological map location 75A2. Protein features are: ATP-dependent RNA helicase DEAD-box, conserved site; DEAD/DEAH box helicase domain; Helicase super…
FBtr0075169	3L_17798178_SNP	A	T	0.2831	47	119	4.3e-05	3.68e-05	0.79905	3L_17798178_SNP	T	SiteClass[FBgn0052187|CG32187|SYNONYMOUS_CODING|0;FBgn0036754|CG5589|UPSTREAM|363],TranscriptAnnot[SYNONYMOUS_CODING(LOW|SILENT|ggA/ggT|G364|409|CG32187|protein_coding|CODING|FBtr0075169|2|1);UPSTREAM(MODIFIER||363||594|CG5589|protein_coding|CODING|FBtr0075170||1)]	(TF_binding_site|mE1_TFBS_cad|FBsf0000245274);(TF_binding_site|mE1_TFBS_chinmo|FBsf0000210373)
FBtr0075170	3L_17798178_SNP	A	T	0.2831	47	119	4.3e-05	3.68e-05	0.79905	3L_17798178_SNP	T	SiteClass[FBgn0052187|CG32187|SYNONYMOUS_CODING|0;FBgn0036754|CG5589|UPSTREAM|363],TranscriptAnnot[SYNONYMOUS_CODING(LOW|SILENT|ggA/ggT|G364|409|CG32187|protein_coding|CODING|FBtr0075169|2|1);UPSTREAM(MODIFIER||363||594|CG5589|protein_coding|CODING|FBtr0075170||1)]	(TF_binding_site|mE1_TFBS_cad|FBsf0000245274);(TF_binding_site|mE1_TFBS_chinmo|FBsf0000210373)
FBgn0262103	2R_14581212_SNP	G	T	0.2857	50	125	5.45e-05	3.78e-05	0.79905	2R_14581212_SNP	T	SiteClass[FBgn0262103|Sik3|INTRON|0],TranscriptAnnot[INTRON(MODIFIER||||702|Sik3|protein_coding|CODING|FBtr0304024|2|1);INTRON(MODIFIER||||1471|Sik3|protein_coding|CODING|FBtr0304025|2|1);INTRON(MODIFIER||||1471|Sik3|protein_coding|CODING|FBtr0304026|2|1);INTRON(MODIFIER||||1468|Sik3|protein_coding|CODING|FBtr0340388|2|1);INTRON(MODIFIER||||1382|Sik3|protein_coding|CODING|FBtr0344258|2|1);INTRON(…	(TF_binding_site|BDTNP1_TFBS_da|FBsf0000324711);(TF_binding_site|BDTNP1_TFBS_twi|FBsf0000199781)	FBgn0262103	The gene Salt-inducible kinase 3 is referred to in FlyBase by the symbol Dmel\Sik3 (CG42856, FBgn0262103). It is a protein_coding_gene from Drosophila melanogaster. It has 6 annotated transcripts and 6 polypeptides (5 unique). Gene sequence location is 2R:18688132..18705805. It has the cytological map location 55E8-55E9. Protein features are: KA1 domain/Ssp2, C-terminal; Kinase associated domain …
FBtr0304024	2R_14581212_SNP	G	T	0.2857	50	125	5.45e-05	3.78e-05	0.79905	2R_14581212_SNP	T	SiteClass[FBgn0262103|Sik3|INTRON|0],TranscriptAnnot[INTRON(MODIFIER||||702|Sik3|protein_coding|CODING|FBtr0304024|2|1);INTRON(MODIFIER||||1471|Sik3|protein_coding|CODING|FBtr0304025|2|1);INTRON(MODIFIER||||1471|Sik3|protein_coding|CODING|FBtr0304026|2|1);INTRON(MODIFIER||||1468|Sik3|protein_coding|CODING|FBtr0340388|2|1);INTRON(MODIFIER||||1382|Sik3|protein_coding|CODING|FBtr0344258|2|1);INTRON(…	(TF_binding_site|BDTNP1_TFBS_da|FBsf0000324711);(TF_binding_site|BDTNP1_TFBS_twi|FBsf0000199781)
FBtr0304025	2R_14581212_SNP	G	T	0.2857	50	125	5.45e-05	3.78e-05	0.79905	2R_14581212_SNP	T	SiteClass[FBgn0262103|Sik3|INTRON|0],TranscriptAnnot[INTRON(MODIFIER||||702|Sik3|protein_coding|CODING|FBtr0304024|2|1);INTRON(MODIFIER||||1471|Sik3|protein_coding|CODING|FBtr0304025|2|1);INTRON(MODIFIER||||1471|Sik3|protein_coding|CODING|FBtr0304026|2|1);INTRON(MODIFIER||||1468|Sik3|protein_coding|CODING|FBtr0340388|2|1);INTRON(MODIFIER||||1382|Sik3|protein_coding|CODING|FBtr0344258|2|1);INTRON(…	(TF_binding_site|BDTNP1_TFBS_da|FBsf0000324711);(TF_binding_site|BDTNP1_TFBS_twi|FBsf0000199781)
FBtr0304026	2R_14581212_SNP	G	T	0.2857	50	125	5.45e-05	3.78e-05	0.79905	2R_14581212_SNP	T	SiteClass[FBgn0262103|Sik3|INTRON|0],TranscriptAnnot[INTRON(MODIFIER||||702|Sik3|protein_coding|CODING|FBtr0304024|2|1);INTRON(MODIFIER||||1471|Sik3|protein_coding|CODING|FBtr0304025|2|1);INTRON(MODIFIER||||1471|Sik3|protein_coding|CODING|FBtr0304026|2|1);INTRON(MODIFIER||||1468|Sik3|protein_coding|CODING|FBtr0340388|2|1);INTRON(MODIFIER||||1382|Sik3|protein_coding|CODING|FBtr0344258|2|1);INTRON(…	(TF_binding_site|BDTNP1_TFBS_da|FBsf0000324711);(TF_binding_site|BDTNP1_TFBS_twi|FBsf0000199781)
FBtr0340388	2R_14581212_SNP	G	T	0.2857	50	125	5.45e-05	3.78e-05	0.79905	2R_14581212_SNP	T	SiteClass[FBgn0262103|Sik3|INTRON|0],TranscriptAnnot[INTRON(MODIFIER||||702|Sik3|protein_coding|CODING|FBtr0304024|2|1);INTRON(MODIFIER||||1471|Sik3|protein_coding|CODING|FBtr0304025|2|1);INTRON(MODIFIER||||1471|Sik3|protein_coding|CODING|FBtr0304026|2|1);INTRON(MODIFIER||||1468|Sik3|protein_coding|CODING|FBtr0340388|2|1);INTRON(MODIFIER||||1382|Sik3|protein_coding|CODING|FBtr0344258|2|1);INTRON(…	(TF_binding_site|BDTNP1_TFBS_da|FBsf0000324711);(TF_binding_site|BDTNP1_TFBS_twi|FBsf0000199781)
FBtr0344258	2R_14581212_SNP	G	T	0.2857	50	125	5.45e-05	3.78e-05	0.79905	2R_14581212_SNP	T	SiteClass[FBgn0262103|Sik3|INTRON|0],TranscriptAnnot[INTRON(MODIFIER||||702|Sik3|protein_coding|CODING|FBtr0304024|2|1);INTRON(MODIFIER||||1471|Sik3|protein_coding|CODING|FBtr0304025|2|1);INTRON(MODIFIER||||1471|Sik3|protein_coding|CODING|FBtr0304026|2|1);INTRON(MODIFIER||||1468|Sik3|protein_coding|CODING|FBtr0340388|2|1);INTRON(MODIFIER||||1382|Sik3|protein_coding|CODING|FBtr0344258|2|1);INTRON(…	(TF_binding_site|BDTNP1_TFBS_da|FBsf0000324711);(TF_binding_site|BDTNP1_TFBS_twi|FBsf0000199781)
FBtr0344259	2R_14581212_SNP	G	T	0.2857	50	125	5.45e-05	3.78e-05	0.79905	2R_14581212_SNP	T	SiteClass[FBgn0262103|Sik3|INTRON|0],TranscriptAnnot[INTRON(MODIFIER||||702|Sik3|protein_coding|CODING|FBtr0304024|2|1);INTRON(MODIFIER||||1471|Sik3|protein_coding|CODING|FBtr0304025|2|1);INTRON(MODIFIER||||1471|Sik3|protein_coding|CODING|FBtr0304026|2|1);INTRON(MODIFIER||||1468|Sik3|protein_coding|CODING|FBtr0340388|2|1);INTRON(MODIFIER||||1382|Sik3|protein_coding|CODING|FBtr0344258|2|1);INTRON(…	(TF_binding_site|BDTNP1_TFBS_da|FBsf0000324711);(TF_binding_site|BDTNP1_TFBS_twi|FBsf0000199781)
FBgn0263873	2L_19842337_SNP	A	G	0.3054	51	116	4.17e-05	3.8e-05	0.79905	2L_19842337_SNP	A	SiteClass[FBgn0263873|sick|INTRON|0],TranscriptAnnot[INTRON(MODIFIER||||2192|sick|protein_coding|CODING|FBtr0329838|2|1);INTRON(MODIFIER||||2176|sick|protein_coding|CODING|FBtr0344856|1|1);INTRON(MODIFIER||||2707|sick|protein_coding|CODING|FBtr0329845|1|1);INTRON(MODIFIER||||2707|sick|protein_coding|CODING|FBtr0329846|1|1)]	-	FBgn0263873	The gene sickie is referred to in FlyBase by the symbol Dmel\sick (CG43720, FBgn0263873). It is a protein_coding_gene from Drosophila melanogaster. It has 12 annotated transcripts and 12 polypeptides (9 unique). Gene sequence location is 2L:19796365..19958424. It has the cytological map location 38A4. Protein features are: AAA+ ATPase domain; ATPase, AAA-type, core; Calponin homology domain; P-lo…
FBtr0329838	2L_19842337_SNP	A	G	0.3054	51	116	4.17e-05	3.8e-05	0.79905	2L_19842337_SNP	A	SiteClass[FBgn0263873|sick|INTRON|0],TranscriptAnnot[INTRON(MODIFIER||||2192|sick|protein_coding|CODING|FBtr0329838|2|1);INTRON(MODIFIER||||2176|sick|protein_coding|CODING|FBtr0344856|1|1);INTRON(MODIFIER||||2707|sick|protein_coding|CODING|FBtr0329845|1|1);INTRON(MODIFIER||||2707|sick|protein_coding|CODING|FBtr0329846|1|1)]	-
FBtr0344856	2L_19842337_SNP	A	G	0.3054	51	116	4.17e-05	3.8e-05	0.79905	2L_19842337_SNP	A	SiteClass[FBgn0263873|sick|INTRON|0],TranscriptAnnot[INTRON(MODIFIER||||2192|sick|protein_coding|CODING|FBtr0329838|2|1);INTRON(MODIFIER||||2176|sick|protein_coding|CODING|FBtr0344856|1|1);INTRON(MODIFIER||||2707|sick|protein_coding|CODING|FBtr0329845|1|1);INTRON(MODIFIER||||2707|sick|protein_coding|CODING|FBtr0329846|1|1)]	-
FBtr0329845	2L_19842337_SNP	A	G	0.3054	51	116	4.17e-05	3.8e-05	0.79905	2L_19842337_SNP	A	SiteClass[FBgn0263873|sick|INTRON|0],TranscriptAnnot[INTRON(MODIFIER||||2192|sick|protein_coding|CODING|FBtr0329838|2|1);INTRON(MODIFIER||||2176|sick|protein_coding|CODING|FBtr0344856|1|1);INTRON(MODIFIER||||2707|sick|protein_coding|CODING|FBtr0329845|1|1);INTRON(MODIFIER||||2707|sick|protein_coding|CODING|FBtr0329846|1|1)]	-
FBtr0329846	2L_19842337_SNP	A	G	0.3054	51	116	4.17e-05	3.8e-05	0.79905	2L_19842337_SNP	A	SiteClass[FBgn0263873|sick|INTRON|0],TranscriptAnnot[INTRON(MODIFIER||||2192|sick|protein_coding|CODING|FBtr0329838|2|1);INTRON(MODIFIER||||2176|sick|protein_coding|CODING|FBtr0344856|1|1);INTRON(MODIFIER||||2707|sick|protein_coding|CODING|FBtr0329845|1|1);INTRON(MODIFIER||||2707|sick|protein_coding|CODING|FBtr0329846|1|1)]	-
FBgn0262533	3L_17867233_SNP	T	G	0.1758	29	136	3.15e-05	3.93e-05	0.79905	3L_17867233_SNP	G	SiteClass[FBgn0262533|CR43087|UPSTREAM|582],TranscriptAnnot[UPSTREAM(MODIFIER||582|||CR43087|pseudogene|NON_CODING|FBtr0304979||1);UPSTREAM(MODIFIER||582|||CR43087|pseudogene|NON_CODING|FBtr0345859||1);INTERGENIC(MODIFIER||||||||||1)]	(TF_binding_site|mE1_TFBS_HSA|FBsf0000366350);(TF_binding_site|mE1_TFBS_Trl|FBsf0000340202)	FBgn0262533	This	gene	is	referred	to	in	FlyBase	by	the	symbol	Dmel\CR43087	(FBgn0262533).	It	is	a	pseudogene_attribute	from	Drosophila	melanogaster.	It	has	2	annotated	transcripts.	Gene	sequence	location	is	3L:17874715..17876573.	It	has	the	cytological	map	location
FBtr0304979	3L_17867233_SNP	T	G	0.1758	29	136	3.15e-05	3.93e-05	0.79905	3L_17867233_SNP	G	SiteClass[FBgn0262533|CR43087|UPSTREAM|582],TranscriptAnnot[UPSTREAM(MODIFIER||582|||CR43087|pseudogene|NON_CODING|FBtr0304979||1);UPSTREAM(MODIFIER||582|||CR43087|pseudogene|NON_CODING|FBtr0345859||1);INTERGENIC(MODIFIER||||||||||1)]	(TF_binding_site|mE1_TFBS_HSA|FBsf0000366350);(TF_binding_site|mE1_TFBS_Trl|FBsf0000340202)
FBtr0345859	3L_17867233_SNP	T	G	0.1758	29	136	3.15e-05	3.93e-05	0.79905	3L_17867233_SNP	G	SiteClass[FBgn0262533|CR43087|UPSTREAM|582],TranscriptAnnot[UPSTREAM(MODIFIER||582|||CR43087|pseudogene|NON_CODING|FBtr0304979||1);UPSTREAM(MODIFIER||582|||CR43087|pseudogene|NON_CODING|FBtr0345859||1);INTERGENIC(MODIFIER||||||||||1)]	(TF_binding_site|mE1_TFBS_HSA|FBsf0000366350);(TF_binding_site|mE1_TFBS_Trl|FBsf0000340202)
FBgn0085280	3L_17669891_SNP	A	G	0.06818	12	164	4.34e-05	3.95e-05	0.79905	3L_17669891_SNP	G	SiteClass[FBgn0085280|CG34251|INTRON|0],TranscriptAnnot[INTRON(MODIFIER||||185|CG34251|protein_coding|CODING|FBtr0112445|2|1);INTRON(MODIFIER||||185|CG34251|protein_coding|CODING|FBtr0301012|2|1)]	-	FBgn0085280	This	gene	is	referred	to	in	FlyBase	by	the	symbol	Dmel\CG34251	(FBgn0085280).	It	is	a	protein_coding_gene	from	Drosophila	melanogaster.	It	has	2	annotated	transcripts	and	2	polypeptides	(1	unique).	Gene	sequence	location	is	3L:17671622..17683581.	It
FBtr0112445	3L_17669891_SNP	A	G	0.06818	12	164	4.34e-05	3.95e-05	0.79905	3L_17669891_SNP	G	SiteClass[FBgn0085280|CG34251|INTRON|0],TranscriptAnnot[INTRON(MODIFIER||||185|CG34251|protein_coding|CODING|FBtr0112445|2|1);INTRON(MODIFIER||||185|CG34251|protein_coding|CODING|FBtr0301012|2|1)]	-
FBtr0301012	3L_17669891_SNP	A	G	0.06818	12	164	4.34e-05	3.95e-05	0.79905	3L_17669891_SNP	G	SiteClass[FBgn0085280|CG34251|INTRON|0],TranscriptAnnot[INTRON(MODIFIER||||185|CG34251|protein_coding|CODING|FBtr0112445|2|1);INTRON(MODIFIER||||185|CG34251|protein_coding|CODING|FBtr0301012|2|1)]	-
FBgn0262103	2R_14581204_SNP	T	C	0.2701	47	127	5.53e-05	3.99e-05	0.79905	2R_14581204_SNP	C	SiteClass[FBgn0262103|Sik3|INTRON|0],TranscriptAnnot[INTRON(MODIFIER||||702|Sik3|protein_coding|CODING|FBtr0304024|2|1);INTRON(MODIFIER||||1471|Sik3|protein_coding|CODING|FBtr0304025|2|1);INTRON(MODIFIER||||1471|Sik3|protein_coding|CODING|FBtr0304026|2|1);INTRON(MODIFIER||||1468|Sik3|protein_coding|CODING|FBtr0340388|2|1);INTRON(MODIFIER||||1382|Sik3|protein_coding|CODING|FBtr0344258|2|1);INTRON(…	(TF_binding_site|BDTNP1_TFBS_da|FBsf0000324711);(TF_binding_site|BDTNP1_TFBS_twi|FBsf0000199781)	FBgn0262103	The gene Salt-inducible kinase 3 is referred to in FlyBase by the symbol Dmel\Sik3 (CG42856, FBgn0262103). It is a protein_coding_gene from Drosophila melanogaster. It has 6 annotated transcripts and 6 polypeptides (5 unique). Gene sequence location is 2R:18688132..18705805. It has the cytological map location 55E8-55E9. Protein features are: KA1 domain/Ssp2, C-terminal; Kinase associated domain …
FBtr0304024	2R_14581204_SNP	T	C	0.2701	47	127	5.53e-05	3.99e-05	0.79905	2R_14581204_SNP	C	SiteClass[FBgn0262103|Sik3|INTRON|0],TranscriptAnnot[INTRON(MODIFIER||||702|Sik3|protein_coding|CODING|FBtr0304024|2|1);INTRON(MODIFIER||||1471|Sik3|protein_coding|CODING|FBtr0304025|2|1);INTRON(MODIFIER||||1471|Sik3|protein_coding|CODING|FBtr0304026|2|1);INTRON(MODIFIER||||1468|Sik3|protein_coding|CODING|FBtr0340388|2|1);INTRON(MODIFIER||||1382|Sik3|protein_coding|CODING|FBtr0344258|2|1);INTRON(…	(TF_binding_site|BDTNP1_TFBS_da|FBsf0000324711);(TF_binding_site|BDTNP1_TFBS_twi|FBsf0000199781)
FBtr0304025	2R_14581204_SNP	T	C	0.2701	47	127	5.53e-05	3.99e-05	0.79905	2R_14581204_SNP	C	SiteClass[FBgn0262103|Sik3|INTRON|0],TranscriptAnnot[INTRON(MODIFIER||||702|Sik3|protein_coding|CODING|FBtr0304024|2|1);INTRON(MODIFIER||||1471|Sik3|protein_coding|CODING|FBtr0304025|2|1);INTRON(MODIFIER||||1471|Sik3|protein_coding|CODING|FBtr0304026|2|1);INTRON(MODIFIER||||1468|Sik3|protein_coding|CODING|FBtr0340388|2|1);INTRON(MODIFIER||||1382|Sik3|protein_coding|CODING|FBtr0344258|2|1);INTRON(…	(TF_binding_site|BDTNP1_TFBS_da|FBsf0000324711);(TF_binding_site|BDTNP1_TFBS_twi|FBsf0000199781)
FBtr0304026	2R_14581204_SNP	T	C	0.2701	47	127	5.53e-05	3.99e-05	0.79905	2R_14581204_SNP	C	SiteClass[FBgn0262103|Sik3|INTRON|0],TranscriptAnnot[INTRON(MODIFIER||||702|Sik3|protein_coding|CODING|FBtr0304024|2|1);INTRON(MODIFIER||||1471|Sik3|protein_coding|CODING|FBtr0304025|2|1);INTRON(MODIFIER||||1471|Sik3|protein_coding|CODING|FBtr0304026|2|1);INTRON(MODIFIER||||1468|Sik3|protein_coding|CODING|FBtr0340388|2|1);INTRON(MODIFIER||||1382|Sik3|protein_coding|CODING|FBtr0344258|2|1);INTRON(…	(TF_binding_site|BDTNP1_TFBS_da|FBsf0000324711);(TF_binding_site|BDTNP1_TFBS_twi|FBsf0000199781)
FBtr0340388	2R_14581204_SNP	T	C	0.2701	47	127	5.53e-05	3.99e-05	0.79905	2R_14581204_SNP	C	SiteClass[FBgn0262103|Sik3|INTRON|0],TranscriptAnnot[INTRON(MODIFIER||||702|Sik3|protein_coding|CODING|FBtr0304024|2|1);INTRON(MODIFIER||||1471|Sik3|protein_coding|CODING|FBtr0304025|2|1);INTRON(MODIFIER||||1471|Sik3|protein_coding|CODING|FBtr0304026|2|1);INTRON(MODIFIER||||1468|Sik3|protein_coding|CODING|FBtr0340388|2|1);INTRON(MODIFIER||||1382|Sik3|protein_coding|CODING|FBtr0344258|2|1);INTRON(…	(TF_binding_site|BDTNP1_TFBS_da|FBsf0000324711);(TF_binding_site|BDTNP1_TFBS_twi|FBsf0000199781)
FBtr0344258	2R_14581204_SNP	T	C	0.2701	47	127	5.53e-05	3.99e-05	0.79905	2R_14581204_SNP	C	SiteClass[FBgn0262103|Sik3|INTRON|0],TranscriptAnnot[INTRON(MODIFIER||||702|Sik3|protein_coding|CODING|FBtr0304024|2|1);INTRON(MODIFIER||||1471|Sik3|protein_coding|CODING|FBtr0304025|2|1);INTRON(MODIFIER||||1471|Sik3|protein_coding|CODING|FBtr0304026|2|1);INTRON(MODIFIER||||1468|Sik3|protein_coding|CODING|FBtr0340388|2|1);INTRON(MODIFIER||||1382|Sik3|protein_coding|CODING|FBtr0344258|2|1);INTRON(…	(TF_binding_site|BDTNP1_TFBS_da|FBsf0000324711);(TF_binding_site|BDTNP1_TFBS_twi|FBsf0000199781)
FBtr0344259	2R_14581204_SNP	T	C	0.2701	47	127	5.53e-05	3.99e-05	0.79905	2R_14581204_SNP	C	SiteClass[FBgn0262103|Sik3|INTRON|0],TranscriptAnnot[INTRON(MODIFIER||||702|Sik3|protein_coding|CODING|FBtr0304024|2|1);INTRON(MODIFIER||||1471|Sik3|protein_coding|CODING|FBtr0304025|2|1);INTRON(MODIFIER||||1471|Sik3|protein_coding|CODING|FBtr0304026|2|1);INTRON(MODIFIER||||1468|Sik3|protein_coding|CODING|FBtr0340388|2|1);INTRON(MODIFIER||||1382|Sik3|protein_coding|CODING|FBtr0344258|2|1);INTRON(…	(TF_binding_site|BDTNP1_TFBS_da|FBsf0000324711);(TF_binding_site|BDTNP1_TFBS_twi|FBsf0000199781)
FBgn0262570	2R_13365273_INS	GTCC	G	0.4795	82	89	4.89e-05	4.02e-05	0.79905	2R_13365273_INS	G	SiteClass[FBgn0262570|CG43110|UTR_3_PRIME|0;FBgn0034225|veil|UPSTREAM|389],TranscriptAnnot[UTR_3_PRIME(MODIFIER||4422||483|CG43110|protein_coding|CODING|FBtr0345650|7|1);UPSTREAM(MODIFIER||389||599|veil|protein_coding|CODING|FBtr0340209||1)]	(TF_binding_site|BDTNP1_TFBS_da|FBsf0000324540);(TF_binding_site|BDTNP1_TFBS_dl|FBsf0000302785);(TF_binding_site|BDTNP1_TFBS_gt|FBsf0000293550);(TF_binding_site|BDTNP1_TFBS_Med|FBsf0000280665);(TF_binding_site|BDTNP1_TFBS_sna|FBsf0000267840);(TF_binding_site|BDTNP1_TFBS_twi|FBsf0000199641);(TF_binding_site|mE1_TFBS_cad|FBsf0000246870)	FBgn0262570	This gene is referred to in FlyBase by the symbol Dmel\CG43110 (FBgn0262570). It is a protein_coding_gene from Drosophila melanogaster. It has 2 annotated transcripts and 2 polypeptides (1 unique). Gene sequence location is 2R:17477565..17486220. It has the cytological map location 54B16-54B17. Protein features are: Peptidase S1, PA clan; Peptidase S1, trypsin family, active site; Peptidase S1A, …
FBgn0034225	2R_13365273_INS	GTCC	G	0.4795	82	89	4.89e-05	4.02e-05	0.79905	2R_13365273_INS	G	SiteClass[FBgn0262570|CG43110|UTR_3_PRIME|0;FBgn0034225|veil|UPSTREAM|389],TranscriptAnnot[UTR_3_PRIME(MODIFIER||4422||483|CG43110|protein_coding|CODING|FBtr0345650|7|1);UPSTREAM(MODIFIER||389||599|veil|protein_coding|CODING|FBtr0340209||1)]	(TF_binding_site|BDTNP1_TFBS_da|FBsf0000324540);(TF_binding_site|BDTNP1_TFBS_dl|FBsf0000302785);(TF_binding_site|BDTNP1_TFBS_gt|FBsf0000293550);(TF_binding_site|BDTNP1_TFBS_Med|FBsf0000280665);(TF_binding_site|BDTNP1_TFBS_sna|FBsf0000267840);(TF_binding_site|BDTNP1_TFBS_twi|FBsf0000199641);(TF_binding_site|mE1_TFBS_cad|FBsf0000246870)	FBgn0034225	The gene veil is referred to in FlyBase by the symbol Dmel\veil (CG4827, FBgn0034225). It is a protein_coding_gene from Drosophila melanogaster. It has 2 annotated transcripts and 2 polypeptides (1 unique). Gene sequence location is 2R:17478158..17482118. It has the cytological map location 54B16-54B17. Protein features are: 5'-Nucleotidase, C-terminal; 5'-Nucleotidase, conserved site; 5'-Nucleot…
FBtr0345650	2R_13365273_INS	GTCC	G	0.4795	82	89	4.89e-05	4.02e-05	0.79905	2R_13365273_INS	G	SiteClass[FBgn0262570|CG43110|UTR_3_PRIME|0;FBgn0034225|veil|UPSTREAM|389],TranscriptAnnot[UTR_3_PRIME(MODIFIER||4422||483|CG43110|protein_coding|CODING|FBtr0345650|7|1);UPSTREAM(MODIFIER||389||599|veil|protein_coding|CODING|FBtr0340209||1)]	(TF_binding_site|BDTNP1_TFBS_da|FBsf0000324540);(TF_binding_site|BDTNP1_TFBS_dl|FBsf0000302785);(TF_binding_site|BDTNP1_TFBS_gt|FBsf0000293550);(TF_binding_site|BDTNP1_TFBS_Med|FBsf0000280665);(TF_binding_site|BDTNP1_TFBS_sna|FBsf0000267840);(TF_binding_site|BDTNP1_TFBS_twi|FBsf0000199641);(TF_binding_site|mE1_TFBS_cad|FBsf0000246870)
FBtr0340209	2R_13365273_INS	GTCC	G	0.4795	82	89	4.89e-05	4.02e-05	0.79905	2R_13365273_INS	G	SiteClass[FBgn0262570|CG43110|UTR_3_PRIME|0;FBgn0034225|veil|UPSTREAM|389],TranscriptAnnot[UTR_3_PRIME(MODIFIER||4422||483|CG43110|protein_coding|CODING|FBtr0345650|7|1);UPSTREAM(MODIFIER||389||599|veil|protein_coding|CODING|FBtr0340209||1)]	(TF_binding_site|BDTNP1_TFBS_da|FBsf0000324540);(TF_binding_site|BDTNP1_TFBS_dl|FBsf0000302785);(TF_binding_site|BDTNP1_TFBS_gt|FBsf0000293550);(TF_binding_site|BDTNP1_TFBS_Med|FBsf0000280665);(TF_binding_site|BDTNP1_TFBS_sna|FBsf0000267840);(TF_binding_site|BDTNP1_TFBS_twi|FBsf0000199641);(TF_binding_site|mE1_TFBS_cad|FBsf0000246870)
FBgn0266798	2L_8863577_SNP	T	G	0.193	33	138	5.26e-05	4.07e-05	0.79905	2L_8863577_SNP	G	SiteClass[FBgn0266798|CR45260|EXON|0;FBgn0052986|CG32986|NON_SYNONYMOUS_CODING|0;FBgn0052987|CG32987|UPSTREAM|234],TranscriptAnnot[NON_SYNONYMOUS_CODING(MODERATE|MISSENSE|caG/caT|Q257H|290|CG32986|protein_coding|CODING|FBtr0079734|1|1);UPSTREAM(MODIFIER||234||257|CG32987|protein_coding|CODING|FBtr0079735||1);EXON(MODIFIER|||||CR45260|ncRNA|NON_CODING|FBtr0345454|1|1)]	(TF_binding_site|mE1_TFBS_HSA|FBsf0000346924);(TF_binding_site|mE1_TFBS_sens|FBsf0000216898)	FBgn0266798	This	gene	is	referred	to	in	FlyBase	by	the	symbol	Dmel\CR45260	(FBgn0266798).	It	is	a	non_protein_coding_gene	from	Drosophila	melanogaster.	It	has	one	annotated	transcript.	Gene	sequence	location	is	2L:8862610..8867511.	It	has	the	cytological	map	location
FBgn0052986	2L_8863577_SNP	T	G	0.193	33	138	5.26e-05	4.07e-05	0.79905	2L_8863577_SNP	G	SiteClass[FBgn0266798|CR45260|EXON|0;FBgn0052986|CG32986|NON_SYNONYMOUS_CODING|0;FBgn0052987|CG32987|UPSTREAM|234],TranscriptAnnot[NON_SYNONYMOUS_CODING(MODERATE|MISSENSE|caG/caT|Q257H|290|CG32986|protein_coding|CODING|FBtr0079734|1|1);UPSTREAM(MODIFIER||234||257|CG32987|protein_coding|CODING|FBtr0079735||1);EXON(MODIFIER|||||CR45260|ncRNA|NON_CODING|FBtr0345454|1|1)]	(TF_binding_site|mE1_TFBS_HSA|FBsf0000346924);(TF_binding_site|mE1_TFBS_sens|FBsf0000216898)	FBgn0052986	This gene is referred to in FlyBase by the symbol Dmel\CG32986 (FBgn0052986). It is a protein_coding_gene from Drosophila melanogaster. It has one annotated transcript and one polypeptide. Gene sequence location is 2L:8862776..8863743. It has the cytological map location 29F3. Its molecular function is unknown. The biological processes in which it is involved are not known. 2 alleles are reported…
FBgn0052987	2L_8863577_SNP	T	G	0.193	33	138	5.26e-05	4.07e-05	0.79905	2L_8863577_SNP	G	SiteClass[FBgn0266798|CR45260|EXON|0;FBgn0052986|CG32986|NON_SYNONYMOUS_CODING|0;FBgn0052987|CG32987|UPSTREAM|234],TranscriptAnnot[NON_SYNONYMOUS_CODING(MODERATE|MISSENSE|caG/caT|Q257H|290|CG32986|protein_coding|CODING|FBtr0079734|1|1);UPSTREAM(MODIFIER||234||257|CG32987|protein_coding|CODING|FBtr0079735||1);EXON(MODIFIER|||||CR45260|ncRNA|NON_CODING|FBtr0345454|1|1)]	(TF_binding_site|mE1_TFBS_HSA|FBsf0000346924);(TF_binding_site|mE1_TFBS_sens|FBsf0000216898)	FBgn0052987	This gene is referred to in FlyBase by the symbol Dmel\CG32987 (FBgn0052987). It is a protein_coding_gene from Drosophila melanogaster. It has one annotated transcript and one polypeptide. Gene sequence location is 2L:8863811..8864847. It has the cytological map location 29F3. Its molecular function is described by: . It is involved in the biological process described with: . 3 alleles are report…
FBtr0079734	2L_8863577_SNP	T	G	0.193	33	138	5.26e-05	4.07e-05	0.79905	2L_8863577_SNP	G	SiteClass[FBgn0266798|CR45260|EXON|0;FBgn0052986|CG32986|NON_SYNONYMOUS_CODING|0;FBgn0052987|CG32987|UPSTREAM|234],TranscriptAnnot[NON_SYNONYMOUS_CODING(MODERATE|MISSENSE|caG/caT|Q257H|290|CG32986|protein_coding|CODING|FBtr0079734|1|1);UPSTREAM(MODIFIER||234||257|CG32987|protein_coding|CODING|FBtr0079735||1);EXON(MODIFIER|||||CR45260|ncRNA|NON_CODING|FBtr0345454|1|1)]	(TF_binding_site|mE1_TFBS_HSA|FBsf0000346924);(TF_binding_site|mE1_TFBS_sens|FBsf0000216898)
FBtr0079735	2L_8863577_SNP	T	G	0.193	33	138	5.26e-05	4.07e-05	0.79905	2L_8863577_SNP	G	SiteClass[FBgn0266798|CR45260|EXON|0;FBgn0052986|CG32986|NON_SYNONYMOUS_CODING|0;FBgn0052987|CG32987|UPSTREAM|234],TranscriptAnnot[NON_SYNONYMOUS_CODING(MODERATE|MISSENSE|caG/caT|Q257H|290|CG32986|protein_coding|CODING|FBtr0079734|1|1);UPSTREAM(MODIFIER||234||257|CG32987|protein_coding|CODING|FBtr0079735||1);EXON(MODIFIER|||||CR45260|ncRNA|NON_CODING|FBtr0345454|1|1)]	(TF_binding_site|mE1_TFBS_HSA|FBsf0000346924);(TF_binding_site|mE1_TFBS_sens|FBsf0000216898)
FBtr0345454	2L_8863577_SNP	T	G	0.193	33	138	5.26e-05	4.07e-05	0.79905	2L_8863577_SNP	G	SiteClass[FBgn0266798|CR45260|EXON|0;FBgn0052986|CG32986|NON_SYNONYMOUS_CODING|0;FBgn0052987|CG32987|UPSTREAM|234],TranscriptAnnot[NON_SYNONYMOUS_CODING(MODERATE|MISSENSE|caG/caT|Q257H|290|CG32986|protein_coding|CODING|FBtr0079734|1|1);UPSTREAM(MODIFIER||234||257|CG32987|protein_coding|CODING|FBtr0079735||1);EXON(MODIFIER|||||CR45260|ncRNA|NON_CODING|FBtr0345454|1|1)]	(TF_binding_site|mE1_TFBS_HSA|FBsf0000346924);(TF_binding_site|mE1_TFBS_sens|FBsf0000216898)
FBgn0034797	2R_18799880_SNP	A	C	0.4793	81	88	4.49e-05	4.07e-05	0.79905	2R_18799880_SNP	A	SiteClass[FBgn0034797|nahoda|INTRON|0],TranscriptAnnot[INTRON(MODIFIER||||1335|nahoda|protein_coding|CODING|FBtr0071942|5|1);INTRON(MODIFIER||||1335|nahoda|protein_coding|CODING|FBtr0071943|5|1);INTRON(MODIFIER||||1148|nahoda|protein_coding|CODING|FBtr0304795|5|1)]	(TF_binding_site|BDTNP1_TFBS_dl|FBsf0000304016);(TF_binding_site|BDTNP1_TFBS_Med|FBsf0000281325);(TF_binding_site|BDTNP1_TFBS_slp1|FBsf0000272321);(TF_binding_site|mE1_TFBS_disco|FBsf0000259958);(TF_binding_site|mE1_TFBS_HSA|FBsf0000359597);(TF_binding_site|mE1_TFBS_sens|FBsf0000229512)	FBgn0034797	The gene nahoda is referred to in FlyBase by the symbol Dmel\nahoda (CG12781, FBgn0034797). It is a protein_coding_gene from Drosophila melanogaster. It has 3 annotated transcripts and 3 polypeptides (2 unique). Gene sequence location is 2R:22896174..22916719. It has the cytological map location 59B4. Protein features are: Chitin-binding, domain 3; DOMON domain; Dopamine beta-hydroxylase-related;…
FBtr0071942	2R_18799880_SNP	A	C	0.4793	81	88	4.49e-05	4.07e-05	0.79905	2R_18799880_SNP	A	SiteClass[FBgn0034797|nahoda|INTRON|0],TranscriptAnnot[INTRON(MODIFIER||||1335|nahoda|protein_coding|CODING|FBtr0071942|5|1);INTRON(MODIFIER||||1335|nahoda|protein_coding|CODING|FBtr0071943|5|1);INTRON(MODIFIER||||1148|nahoda|protein_coding|CODING|FBtr0304795|5|1)]	(TF_binding_site|BDTNP1_TFBS_dl|FBsf0000304016);(TF_binding_site|BDTNP1_TFBS_Med|FBsf0000281325);(TF_binding_site|BDTNP1_TFBS_slp1|FBsf0000272321);(TF_binding_site|mE1_TFBS_disco|FBsf0000259958);(TF_binding_site|mE1_TFBS_HSA|FBsf0000359597);(TF_binding_site|mE1_TFBS_sens|FBsf0000229512)
FBtr0071943	2R_18799880_SNP	A	C	0.4793	81	88	4.49e-05	4.07e-05	0.79905	2R_18799880_SNP	A	SiteClass[FBgn0034797|nahoda|INTRON|0],TranscriptAnnot[INTRON(MODIFIER||||1335|nahoda|protein_coding|CODING|FBtr0071942|5|1);INTRON(MODIFIER||||1335|nahoda|protein_coding|CODING|FBtr0071943|5|1);INTRON(MODIFIER||||1148|nahoda|protein_coding|CODING|FBtr0304795|5|1)]	(TF_binding_site|BDTNP1_TFBS_dl|FBsf0000304016);(TF_binding_site|BDTNP1_TFBS_Med|FBsf0000281325);(TF_binding_site|BDTNP1_TFBS_slp1|FBsf0000272321);(TF_binding_site|mE1_TFBS_disco|FBsf0000259958);(TF_binding_site|mE1_TFBS_HSA|FBsf0000359597);(TF_binding_site|mE1_TFBS_sens|FBsf0000229512)
FBtr0304795	2R_18799880_SNP	A	C	0.4793	81	88	4.49e-05	4.07e-05	0.79905	2R_18799880_SNP	A	SiteClass[FBgn0034797|nahoda|INTRON|0],TranscriptAnnot[INTRON(MODIFIER||||1335|nahoda|protein_coding|CODING|FBtr0071942|5|1);INTRON(MODIFIER||||1335|nahoda|protein_coding|CODING|FBtr0071943|5|1);INTRON(MODIFIER||||1148|nahoda|protein_coding|CODING|FBtr0304795|5|1)]	(TF_binding_site|BDTNP1_TFBS_dl|FBsf0000304016);(TF_binding_site|BDTNP1_TFBS_Med|FBsf0000281325);(TF_binding_site|BDTNP1_TFBS_slp1|FBsf0000272321);(TF_binding_site|mE1_TFBS_disco|FBsf0000259958);(TF_binding_site|mE1_TFBS_HSA|FBsf0000359597);(TF_binding_site|mE1_TFBS_sens|FBsf0000229512)
FBgn0003502	2L_8267234_SNP	A	C	0.375	60	100	5.13e-05	4.11e-05	0.79905	2L_8267234_SNP	C	SiteClass[FBgn0003502|Btk29A|INTRON|0],TranscriptAnnot[INTRON(MODIFIER||||603|Btk29A|protein_coding|CODING|FBtr0079615|2|1);INTRON(MODIFIER||||603|Btk29A|protein_coding|CODING|FBtr0079618|2|1);INTRON(MODIFIER||||603|Btk29A|protein_coding|CODING|FBtr0112835|1|1);INTRON(MODIFIER||||786|Btk29A|protein_coding|CODING|FBtr0079616|5|1);INTRON(MODIFIER||||786|Btk29A|protein_coding|CODING|FBtr0079617|5|1)…	(TF_binding_site|BDTNP1_TFBS_da|FBsf0000321905);(TF_binding_site|BDTNP1_TFBS_dl|FBsf0000297470);(TF_binding_site|BDTNP1_TFBS_sna|FBsf0000268490)	FBgn0003502	The gene Btk family kinase at 29A is referred to in FlyBase by the symbol Dmel\Btk29A (CG8049, FBgn0003502). It is a protein_coding_gene from Drosophila melanogaster. It has 8 annotated transcripts and 8 polypeptides (4 unique). Gene sequence location is 2L:8258373..8301079. It has the cytological map location 29A1-29A3. Protein features are: PH domain-like; Pleckstrin homology domain; Protein ki…
FBtr0079615	2L_8267234_SNP	A	C	0.375	60	100	5.13e-05	4.11e-05	0.79905	2L_8267234_SNP	C	SiteClass[FBgn0003502|Btk29A|INTRON|0],TranscriptAnnot[INTRON(MODIFIER||||603|Btk29A|protein_coding|CODING|FBtr0079615|2|1);INTRON(MODIFIER||||603|Btk29A|protein_coding|CODING|FBtr0079618|2|1);INTRON(MODIFIER||||603|Btk29A|protein_coding|CODING|FBtr0112835|1|1);INTRON(MODIFIER||||786|Btk29A|protein_coding|CODING|FBtr0079616|5|1);INTRON(MODIFIER||||786|Btk29A|protein_coding|CODING|FBtr0079617|5|1)…	(TF_binding_site|BDTNP1_TFBS_da|FBsf0000321905);(TF_binding_site|BDTNP1_TFBS_dl|FBsf0000297470);(TF_binding_site|BDTNP1_TFBS_sna|FBsf0000268490)
FBtr0079618	2L_8267234_SNP	A	C	0.375	60	100	5.13e-05	4.11e-05	0.79905	2L_8267234_SNP	C	SiteClass[FBgn0003502|Btk29A|INTRON|0],TranscriptAnnot[INTRON(MODIFIER||||603|Btk29A|protein_coding|CODING|FBtr0079615|2|1);INTRON(MODIFIER||||603|Btk29A|protein_coding|CODING|FBtr0079618|2|1);INTRON(MODIFIER||||603|Btk29A|protein_coding|CODING|FBtr0112835|1|1);INTRON(MODIFIER||||786|Btk29A|protein_coding|CODING|FBtr0079616|5|1);INTRON(MODIFIER||||786|Btk29A|protein_coding|CODING|FBtr0079617|5|1)…	(TF_binding_site|BDTNP1_TFBS_da|FBsf0000321905);(TF_binding_site|BDTNP1_TFBS_dl|FBsf0000297470);(TF_binding_site|BDTNP1_TFBS_sna|FBsf0000268490)
FBtr0112835	2L_8267234_SNP	A	C	0.375	60	100	5.13e-05	4.11e-05	0.79905	2L_8267234_SNP	C	SiteClass[FBgn0003502|Btk29A|INTRON|0],TranscriptAnnot[INTRON(MODIFIER||||603|Btk29A|protein_coding|CODING|FBtr0079615|2|1);INTRON(MODIFIER||||603|Btk29A|protein_coding|CODING|FBtr0079618|2|1);INTRON(MODIFIER||||603|Btk29A|protein_coding|CODING|FBtr0112835|1|1);INTRON(MODIFIER||||786|Btk29A|protein_coding|CODING|FBtr0079616|5|1);INTRON(MODIFIER||||786|Btk29A|protein_coding|CODING|FBtr0079617|5|1)…	(TF_binding_site|BDTNP1_TFBS_da|FBsf0000321905);(TF_binding_site|BDTNP1_TFBS_dl|FBsf0000297470);(TF_binding_site|BDTNP1_TFBS_sna|FBsf0000268490)
FBtr0079616	2L_8267234_SNP	A	C	0.375	60	100	5.13e-05	4.11e-05	0.79905	2L_8267234_SNP	C	SiteClass[FBgn0003502|Btk29A|INTRON|0],TranscriptAnnot[INTRON(MODIFIER||||603|Btk29A|protein_coding|CODING|FBtr0079615|2|1);INTRON(MODIFIER||||603|Btk29A|protein_coding|CODING|FBtr0079618|2|1);INTRON(MODIFIER||||603|Btk29A|protein_coding|CODING|FBtr0112835|1|1);INTRON(MODIFIER||||786|Btk29A|protein_coding|CODING|FBtr0079616|5|1);INTRON(MODIFIER||||786|Btk29A|protein_coding|CODING|FBtr0079617|5|1)…	(TF_binding_site|BDTNP1_TFBS_da|FBsf0000321905);(TF_binding_site|BDTNP1_TFBS_dl|FBsf0000297470);(TF_binding_site|BDTNP1_TFBS_sna|FBsf0000268490)
FBtr0079617	2L_8267234_SNP	A	C	0.375	60	100	5.13e-05	4.11e-05	0.79905	2L_8267234_SNP	C	SiteClass[FBgn0003502|Btk29A|INTRON|0],TranscriptAnnot[INTRON(MODIFIER||||603|Btk29A|protein_coding|CODING|FBtr0079615|2|1);INTRON(MODIFIER||||603|Btk29A|protein_coding|CODING|FBtr0079618|2|1);INTRON(MODIFIER||||603|Btk29A|protein_coding|CODING|FBtr0112835|1|1);INTRON(MODIFIER||||786|Btk29A|protein_coding|CODING|FBtr0079616|5|1);INTRON(MODIFIER||||786|Btk29A|protein_coding|CODING|FBtr0079617|5|1)…	(TF_binding_site|BDTNP1_TFBS_da|FBsf0000321905);(TF_binding_site|BDTNP1_TFBS_dl|FBsf0000297470);(TF_binding_site|BDTNP1_TFBS_sna|FBsf0000268490)
FBtr0112836	2L_8267234_SNP	A	C	0.375	60	100	5.13e-05	4.11e-05	0.79905	2L_8267234_SNP	C	SiteClass[FBgn0003502|Btk29A|INTRON|0],TranscriptAnnot[INTRON(MODIFIER||||603|Btk29A|protein_coding|CODING|FBtr0079615|2|1);INTRON(MODIFIER||||603|Btk29A|protein_coding|CODING|FBtr0079618|2|1);INTRON(MODIFIER||||603|Btk29A|protein_coding|CODING|FBtr0112835|1|1);INTRON(MODIFIER||||786|Btk29A|protein_coding|CODING|FBtr0079616|5|1);INTRON(MODIFIER||||786|Btk29A|protein_coding|CODING|FBtr0079617|5|1)…	(TF_binding_site|BDTNP1_TFBS_da|FBsf0000321905);(TF_binding_site|BDTNP1_TFBS_dl|FBsf0000297470);(TF_binding_site|BDTNP1_TFBS_sna|FBsf0000268490)
FBtr0330693	2L_8267234_SNP	A	C	0.375	60	100	5.13e-05	4.11e-05	0.79905	2L_8267234_SNP	C	SiteClass[FBgn0003502|Btk29A|INTRON|0],TranscriptAnnot[INTRON(MODIFIER||||603|Btk29A|protein_coding|CODING|FBtr0079615|2|1);INTRON(MODIFIER||||603|Btk29A|protein_coding|CODING|FBtr0079618|2|1);INTRON(MODIFIER||||603|Btk29A|protein_coding|CODING|FBtr0112835|1|1);INTRON(MODIFIER||||786|Btk29A|protein_coding|CODING|FBtr0079616|5|1);INTRON(MODIFIER||||786|Btk29A|protein_coding|CODING|FBtr0079617|5|1)…	(TF_binding_site|BDTNP1_TFBS_da|FBsf0000321905);(TF_binding_site|BDTNP1_TFBS_dl|FBsf0000297470);(TF_binding_site|BDTNP1_TFBS_sna|FBsf0000268490)
FBgn0039718	3R_25729815_SNP	G	T	0.2893	46	113	5.25e-05	4.12e-05	0.79905	3R_25729815_SNP	T	SiteClass[FBgn0039718|CG15517|UPSTREAM|268;FBgn0051038|CG31038|DOWNSTREAM|862],TranscriptAnnot[UPSTREAM(MODIFIER||268||158|CG15517|protein_coding|CODING|FBtr0085515||1);DOWNSTREAM(MODIFIER||862||730|CG31038|protein_coding|CODING|FBtr0085494||1);DOWNSTREAM(MODIFIER||862||441|CG31038|protein_coding|CODING|FBtr0085497||1);DOWNSTREAM(MODIFIER||862||730|CG31038|protein_coding|CODING|FBtr0085498||1);DO…	(insulator|Insulator_Class_I.mE01|FBsf0000158704);(TF_binding_site|mE1_TFBS_bab1|FBsf0000214866);(TF_binding_site|mE1_TFBS_HSA|FBsf0000376508)	FBgn0039718	This gene is referred to in FlyBase by the symbol Dmel\CG15517 (FBgn0039718). It is a protein_coding_gene from Drosophila melanogaster. It has one annotated transcript and one polypeptide. Gene sequence location is 3R:29903240..29903825. It has the cytological map location 99C6. Protein features are: Domain of unknown function DUF4773. Its molecular function is described by: . It is involved in t…
FBgn0051038	3R_25729815_SNP	G	T	0.2893	46	113	5.25e-05	4.12e-05	0.79905	3R_25729815_SNP	T	SiteClass[FBgn0039718|CG15517|UPSTREAM|268;FBgn0051038|CG31038|DOWNSTREAM|862],TranscriptAnnot[UPSTREAM(MODIFIER||268||158|CG15517|protein_coding|CODING|FBtr0085515||1);DOWNSTREAM(MODIFIER||862||730|CG31038|protein_coding|CODING|FBtr0085494||1);DOWNSTREAM(MODIFIER||862||441|CG31038|protein_coding|CODING|FBtr0085497||1);DOWNSTREAM(MODIFIER||862||730|CG31038|protein_coding|CODING|FBtr0085498||1);DO…	(insulator|Insulator_Class_I.mE01|FBsf0000158704);(TF_binding_site|mE1_TFBS_bab1|FBsf0000214866);(TF_binding_site|mE1_TFBS_HSA|FBsf0000376508)	FBgn0051038	This gene is referred to in FlyBase by the symbol Dmel\CG31038 (FBgn0051038). It is a protein_coding_gene from Drosophila melanogaster. It has 7 annotated transcripts and 7 polypeptides (5 unique). Gene sequence location is 3R:29877059..29903231. It has the cytological map location 99C5-99C6. Its molecular function is unknown. The biological processes in which it is involved are not known. 11 all…
FBtr0085515	3R_25729815_SNP	G	T	0.2893	46	113	5.25e-05	4.12e-05	0.79905	3R_25729815_SNP	T	SiteClass[FBgn0039718|CG15517|UPSTREAM|268;FBgn0051038|CG31038|DOWNSTREAM|862],TranscriptAnnot[UPSTREAM(MODIFIER||268||158|CG15517|protein_coding|CODING|FBtr0085515||1);DOWNSTREAM(MODIFIER||862||730|CG31038|protein_coding|CODING|FBtr0085494||1);DOWNSTREAM(MODIFIER||862||441|CG31038|protein_coding|CODING|FBtr0085497||1);DOWNSTREAM(MODIFIER||862||730|CG31038|protein_coding|CODING|FBtr0085498||1);DO…	(insulator|Insulator_Class_I.mE01|FBsf0000158704);(TF_binding_site|mE1_TFBS_bab1|FBsf0000214866);(TF_binding_site|mE1_TFBS_HSA|FBsf0000376508)
FBtr0085494	3R_25729815_SNP	G	T	0.2893	46	113	5.25e-05	4.12e-05	0.79905	3R_25729815_SNP	T	SiteClass[FBgn0039718|CG15517|UPSTREAM|268;FBgn0051038|CG31038|DOWNSTREAM|862],TranscriptAnnot[UPSTREAM(MODIFIER||268||158|CG15517|protein_coding|CODING|FBtr0085515||1);DOWNSTREAM(MODIFIER||862||730|CG31038|protein_coding|CODING|FBtr0085494||1);DOWNSTREAM(MODIFIER||862||441|CG31038|protein_coding|CODING|FBtr0085497||1);DOWNSTREAM(MODIFIER||862||730|CG31038|protein_coding|CODING|FBtr0085498||1);DO…	(insulator|Insulator_Class_I.mE01|FBsf0000158704);(TF_binding_site|mE1_TFBS_bab1|FBsf0000214866);(TF_binding_site|mE1_TFBS_HSA|FBsf0000376508)
FBtr0085497	3R_25729815_SNP	G	T	0.2893	46	113	5.25e-05	4.12e-05	0.79905	3R_25729815_SNP	T	SiteClass[FBgn0039718|CG15517|UPSTREAM|268;FBgn0051038|CG31038|DOWNSTREAM|862],TranscriptAnnot[UPSTREAM(MODIFIER||268||158|CG15517|protein_coding|CODING|FBtr0085515||1);DOWNSTREAM(MODIFIER||862||730|CG31038|protein_coding|CODING|FBtr0085494||1);DOWNSTREAM(MODIFIER||862||441|CG31038|protein_coding|CODING|FBtr0085497||1);DOWNSTREAM(MODIFIER||862||730|CG31038|protein_coding|CODING|FBtr0085498||1);DO…	(insulator|Insulator_Class_I.mE01|FBsf0000158704);(TF_binding_site|mE1_TFBS_bab1|FBsf0000214866);(TF_binding_site|mE1_TFBS_HSA|FBsf0000376508)
FBtr0085498	3R_25729815_SNP	G	T	0.2893	46	113	5.25e-05	4.12e-05	0.79905	3R_25729815_SNP	T	SiteClass[FBgn0039718|CG15517|UPSTREAM|268;FBgn0051038|CG31038|DOWNSTREAM|862],TranscriptAnnot[UPSTREAM(MODIFIER||268||158|CG15517|protein_coding|CODING|FBtr0085515||1);DOWNSTREAM(MODIFIER||862||730|CG31038|protein_coding|CODING|FBtr0085494||1);DOWNSTREAM(MODIFIER||862||441|CG31038|protein_coding|CODING|FBtr0085497||1);DOWNSTREAM(MODIFIER||862||730|CG31038|protein_coding|CODING|FBtr0085498||1);DO…	(insulator|Insulator_Class_I.mE01|FBsf0000158704);(TF_binding_site|mE1_TFBS_bab1|FBsf0000214866);(TF_binding_site|mE1_TFBS_HSA|FBsf0000376508)
FBtr0333274	3R_25729815_SNP	G	T	0.2893	46	113	5.25e-05	4.12e-05	0.79905	3R_25729815_SNP	T	SiteClass[FBgn0039718|CG15517|UPSTREAM|268;FBgn0051038|CG31038|DOWNSTREAM|862],TranscriptAnnot[UPSTREAM(MODIFIER||268||158|CG15517|protein_coding|CODING|FBtr0085515||1);DOWNSTREAM(MODIFIER||862||730|CG31038|protein_coding|CODING|FBtr0085494||1);DOWNSTREAM(MODIFIER||862||441|CG31038|protein_coding|CODING|FBtr0085497||1);DOWNSTREAM(MODIFIER||862||730|CG31038|protein_coding|CODING|FBtr0085498||1);DO…	(insulator|Insulator_Class_I.mE01|FBsf0000158704);(TF_binding_site|mE1_TFBS_bab1|FBsf0000214866);(TF_binding_site|mE1_TFBS_HSA|FBsf0000376508)
FBtr0333275	3R_25729815_SNP	G	T	0.2893	46	113	5.25e-05	4.12e-05	0.79905	3R_25729815_SNP	T	SiteClass[FBgn0039718|CG15517|UPSTREAM|268;FBgn0051038|CG31038|DOWNSTREAM|862],TranscriptAnnot[UPSTREAM(MODIFIER||268||158|CG15517|protein_coding|CODING|FBtr0085515||1);DOWNSTREAM(MODIFIER||862||730|CG31038|protein_coding|CODING|FBtr0085494||1);DOWNSTREAM(MODIFIER||862||441|CG31038|protein_coding|CODING|FBtr0085497||1);DOWNSTREAM(MODIFIER||862||730|CG31038|protein_coding|CODING|FBtr0085498||1);DO…	(insulator|Insulator_Class_I.mE01|FBsf0000158704);(TF_binding_site|mE1_TFBS_bab1|FBsf0000214866);(TF_binding_site|mE1_TFBS_HSA|FBsf0000376508)
FBgn0033638	2R_7512597_SNP	C	G	0.463	75	87	6.58e-05	4.14e-05	0.79905	2R_7512597_SNP	C	SiteClass[FBgn0033638|CG9005|NON_SYNONYMOUS_CODING|0],TranscriptAnnot[NON_SYNONYMOUS_CODING(MODERATE|MISSENSE|gGg/gCg|G34A|1297|CG9005|protein_coding|CODING|FBtr0088089|3|1);NON_SYNONYMOUS_CODING(MODERATE|MISSENSE|gGg/gCg|G34A|1297|CG9005|protein_coding|CODING|FBtr0300945|3|1);NON_SYNONYMOUS_CODING(MODERATE|MISSENSE|gGg/gCg|G34A|1297|CG9005|protein_coding|CODING|FBtr0306029|3|1)]	(TF_binding_site|mE1_TFBS_cad|FBsf0000246374);(TF_binding_site|mE1_TFBS_chinmo|FBsf0000211109)	FBgn0033638	This gene is referred to in FlyBase by the symbol Dmel\CG9005 (FBgn0033638). It is a protein_coding_gene from Drosophila melanogaster. It has 3 annotated transcripts and 3 polypeptides (1 unique). Gene sequence location is 2R:11619479..11640941. It has the cytological map location 48A3-48B2. Protein features are: Domain of unknown function DUF4210. Its molecular function is described by: . It is …
FBtr0088089	2R_7512597_SNP	C	G	0.463	75	87	6.58e-05	4.14e-05	0.79905	2R_7512597_SNP	C	SiteClass[FBgn0033638|CG9005|NON_SYNONYMOUS_CODING|0],TranscriptAnnot[NON_SYNONYMOUS_CODING(MODERATE|MISSENSE|gGg/gCg|G34A|1297|CG9005|protein_coding|CODING|FBtr0088089|3|1);NON_SYNONYMOUS_CODING(MODERATE|MISSENSE|gGg/gCg|G34A|1297|CG9005|protein_coding|CODING|FBtr0300945|3|1);NON_SYNONYMOUS_CODING(MODERATE|MISSENSE|gGg/gCg|G34A|1297|CG9005|protein_coding|CODING|FBtr0306029|3|1)]	(TF_binding_site|mE1_TFBS_cad|FBsf0000246374);(TF_binding_site|mE1_TFBS_chinmo|FBsf0000211109)
FBtr0300945	2R_7512597_SNP	C	G	0.463	75	87	6.58e-05	4.14e-05	0.79905	2R_7512597_SNP	C	SiteClass[FBgn0033638|CG9005|NON_SYNONYMOUS_CODING|0],TranscriptAnnot[NON_SYNONYMOUS_CODING(MODERATE|MISSENSE|gGg/gCg|G34A|1297|CG9005|protein_coding|CODING|FBtr0088089|3|1);NON_SYNONYMOUS_CODING(MODERATE|MISSENSE|gGg/gCg|G34A|1297|CG9005|protein_coding|CODING|FBtr0300945|3|1);NON_SYNONYMOUS_CODING(MODERATE|MISSENSE|gGg/gCg|G34A|1297|CG9005|protein_coding|CODING|FBtr0306029|3|1)]	(TF_binding_site|mE1_TFBS_cad|FBsf0000246374);(TF_binding_site|mE1_TFBS_chinmo|FBsf0000211109)
FBtr0306029	2R_7512597_SNP	C	G	0.463	75	87	6.58e-05	4.14e-05	0.79905	2R_7512597_SNP	C	SiteClass[FBgn0033638|CG9005|NON_SYNONYMOUS_CODING|0],TranscriptAnnot[NON_SYNONYMOUS_CODING(MODERATE|MISSENSE|gGg/gCg|G34A|1297|CG9005|protein_coding|CODING|FBtr0088089|3|1);NON_SYNONYMOUS_CODING(MODERATE|MISSENSE|gGg/gCg|G34A|1297|CG9005|protein_coding|CODING|FBtr0300945|3|1);NON_SYNONYMOUS_CODING(MODERATE|MISSENSE|gGg/gCg|G34A|1297|CG9005|protein_coding|CODING|FBtr0306029|3|1)]	(TF_binding_site|mE1_TFBS_cad|FBsf0000246374);(TF_binding_site|mE1_TFBS_chinmo|FBsf0000211109)
FBgn0010228	2R_17586787_SNP	T	C	0.1307	23	153	5.4e-05	4.14e-05	0.79905	2R_17586787_SNP	C	SiteClass[FBgn0010228|HmgZ|INTRON|0],TranscriptAnnot[INTRON(MODIFIER||||111|HmgZ|protein_coding|CODING|FBtr0342960|1|1);INTRON(MODIFIER||||111|HmgZ|protein_coding|CODING|FBtr0071674|1|1);INTRON(MODIFIER||||111|HmgZ|protein_coding|CODING|FBtr0071673|1|1);INTRON(MODIFIER||||111|HmgZ|protein_coding|CODING|FBtr0345488|1|1)]	(TF_binding_site|mE1_TFBS_HSA|FBsf0000359174);(TF_binding_site|mE1_TFBS_sens|FBsf0000229282)	FBgn0010228	The gene HMG protein Z is referred to in FlyBase by the symbol Dmel\HmgZ (CG17921, FBgn0010228). It is a protein_coding_gene from Drosophila melanogaster. It has 4 annotated transcripts and 4 polypeptides (1 unique). Gene sequence location is 2R:21697488..21707861. It has the cytological map location 57F9-57F10. Protein features are: High mobility group box domain. Its molecular function is descr…
FBtr0342960	2R_17586787_SNP	T	C	0.1307	23	153	5.4e-05	4.14e-05	0.79905	2R_17586787_SNP	C	SiteClass[FBgn0010228|HmgZ|INTRON|0],TranscriptAnnot[INTRON(MODIFIER||||111|HmgZ|protein_coding|CODING|FBtr0342960|1|1);INTRON(MODIFIER||||111|HmgZ|protein_coding|CODING|FBtr0071674|1|1);INTRON(MODIFIER||||111|HmgZ|protein_coding|CODING|FBtr0071673|1|1);INTRON(MODIFIER||||111|HmgZ|protein_coding|CODING|FBtr0345488|1|1)]	(TF_binding_site|mE1_TFBS_HSA|FBsf0000359174);(TF_binding_site|mE1_TFBS_sens|FBsf0000229282)
FBtr0071674	2R_17586787_SNP	T	C	0.1307	23	153	5.4e-05	4.14e-05	0.79905	2R_17586787_SNP	C	SiteClass[FBgn0010228|HmgZ|INTRON|0],TranscriptAnnot[INTRON(MODIFIER||||111|HmgZ|protein_coding|CODING|FBtr0342960|1|1);INTRON(MODIFIER||||111|HmgZ|protein_coding|CODING|FBtr0071674|1|1);INTRON(MODIFIER||||111|HmgZ|protein_coding|CODING|FBtr0071673|1|1);INTRON(MODIFIER||||111|HmgZ|protein_coding|CODING|FBtr0345488|1|1)]	(TF_binding_site|mE1_TFBS_HSA|FBsf0000359174);(TF_binding_site|mE1_TFBS_sens|FBsf0000229282)
FBtr0071673	2R_17586787_SNP	T	C	0.1307	23	153	5.4e-05	4.14e-05	0.79905	2R_17586787_SNP	C	SiteClass[FBgn0010228|HmgZ|INTRON|0],TranscriptAnnot[INTRON(MODIFIER||||111|HmgZ|protein_coding|CODING|FBtr0342960|1|1);INTRON(MODIFIER||||111|HmgZ|protein_coding|CODING|FBtr0071674|1|1);INTRON(MODIFIER||||111|HmgZ|protein_coding|CODING|FBtr0071673|1|1);INTRON(MODIFIER||||111|HmgZ|protein_coding|CODING|FBtr0345488|1|1)]	(TF_binding_site|mE1_TFBS_HSA|FBsf0000359174);(TF_binding_site|mE1_TFBS_sens|FBsf0000229282)
FBtr0345488	2R_17586787_SNP	T	C	0.1307	23	153	5.4e-05	4.14e-05	0.79905	2R_17586787_SNP	C	SiteClass[FBgn0010228|HmgZ|INTRON|0],TranscriptAnnot[INTRON(MODIFIER||||111|HmgZ|protein_coding|CODING|FBtr0342960|1|1);INTRON(MODIFIER||||111|HmgZ|protein_coding|CODING|FBtr0071674|1|1);INTRON(MODIFIER||||111|HmgZ|protein_coding|CODING|FBtr0071673|1|1);INTRON(MODIFIER||||111|HmgZ|protein_coding|CODING|FBtr0345488|1|1)]	(TF_binding_site|mE1_TFBS_HSA|FBsf0000359174);(TF_binding_site|mE1_TFBS_sens|FBsf0000229282)
FBgn0032850	2L_20101000_SNP	C	T	0.08284	14	155	5.93e-05	4.23e-05	0.79905	2L_20101000_SNP	T	SiteClass[FBgn0032850|Kua|SYNONYMOUS_CODING|0],TranscriptAnnot[SYNONYMOUS_CODING(LOW|SILENT|gaT/gaC|D18|310|Kua|protein_coding|CODING|FBtr0331616|3|1);SYNONYMOUS_CODING(LOW|SILENT|gaT/gaC|D18|310|Kua|protein_coding|CODING|FBtr0081336|2|1);SYNONYMOUS_CODING(LOW|SILENT|gaT/gaC|D18|310|Kua|protein_coding|CODING|FBtr0331617|2|1);SYNONYMOUS_CODING(LOW|SILENT|gaT/gaC|D18|310|Kua|protein_coding|CODING|F…	-	FBgn0032850	The gene Kua is referred to in FlyBase by the symbol Dmel\Kua (CG10723, FBgn0032850). It is a protein_coding_gene from Drosophila melanogaster. It has 4 annotated transcripts and 4 polypeptides (1 unique). Gene sequence location is 2L:20097581..20103375. It has the cytological map location 38B6-38C1. Protein features are: B domain of TMEM189, localisation domain. Its molecular function is describ…
FBtr0331616	2L_20101000_SNP	C	T	0.08284	14	155	5.93e-05	4.23e-05	0.79905	2L_20101000_SNP	T	SiteClass[FBgn0032850|Kua|SYNONYMOUS_CODING|0],TranscriptAnnot[SYNONYMOUS_CODING(LOW|SILENT|gaT/gaC|D18|310|Kua|protein_coding|CODING|FBtr0331616|3|1);SYNONYMOUS_CODING(LOW|SILENT|gaT/gaC|D18|310|Kua|protein_coding|CODING|FBtr0081336|2|1);SYNONYMOUS_CODING(LOW|SILENT|gaT/gaC|D18|310|Kua|protein_coding|CODING|FBtr0331617|2|1);SYNONYMOUS_CODING(LOW|SILENT|gaT/gaC|D18|310|Kua|protein_coding|CODING|F…	-
FBtr0081336	2L_20101000_SNP	C	T	0.08284	14	155	5.93e-05	4.23e-05	0.79905	2L_20101000_SNP	T	SiteClass[FBgn0032850|Kua|SYNONYMOUS_CODING|0],TranscriptAnnot[SYNONYMOUS_CODING(LOW|SILENT|gaT/gaC|D18|310|Kua|protein_coding|CODING|FBtr0331616|3|1);SYNONYMOUS_CODING(LOW|SILENT|gaT/gaC|D18|310|Kua|protein_coding|CODING|FBtr0081336|2|1);SYNONYMOUS_CODING(LOW|SILENT|gaT/gaC|D18|310|Kua|protein_coding|CODING|FBtr0331617|2|1);SYNONYMOUS_CODING(LOW|SILENT|gaT/gaC|D18|310|Kua|protein_coding|CODING|F…	-
FBtr0331617	2L_20101000_SNP	C	T	0.08284	14	155	5.93e-05	4.23e-05	0.79905	2L_20101000_SNP	T	SiteClass[FBgn0032850|Kua|SYNONYMOUS_CODING|0],TranscriptAnnot[SYNONYMOUS_CODING(LOW|SILENT|gaT/gaC|D18|310|Kua|protein_coding|CODING|FBtr0331616|3|1);SYNONYMOUS_CODING(LOW|SILENT|gaT/gaC|D18|310|Kua|protein_coding|CODING|FBtr0081336|2|1);SYNONYMOUS_CODING(LOW|SILENT|gaT/gaC|D18|310|Kua|protein_coding|CODING|FBtr0331617|2|1);SYNONYMOUS_CODING(LOW|SILENT|gaT/gaC|D18|310|Kua|protein_coding|CODING|F…	-
FBtr0303230	2L_20101000_SNP	C	T	0.08284	14	155	5.93e-05	4.23e-05	0.79905	2L_20101000_SNP	T	SiteClass[FBgn0032850|Kua|SYNONYMOUS_CODING|0],TranscriptAnnot[SYNONYMOUS_CODING(LOW|SILENT|gaT/gaC|D18|310|Kua|protein_coding|CODING|FBtr0331616|3|1);SYNONYMOUS_CODING(LOW|SILENT|gaT/gaC|D18|310|Kua|protein_coding|CODING|FBtr0081336|2|1);SYNONYMOUS_CODING(LOW|SILENT|gaT/gaC|D18|310|Kua|protein_coding|CODING|FBtr0331617|2|1);SYNONYMOUS_CODING(LOW|SILENT|gaT/gaC|D18|310|Kua|protein_coding|CODING|F…	-
FBgn0034091	2R_12102244_SNP	A	G	0.09659	17	159	4.25e-05	4.24e-05	0.79905	2R_12102244_SNP	G	SiteClass[FBgn0034091|mrj|INTRON|0],TranscriptAnnot[INTRON(MODIFIER||||346|mrj|protein_coding|CODING|FBtr0332855|2|1);INTRON(MODIFIER||||259|mrj|protein_coding|CODING|FBtr0087193|1|1)]	-	FBgn0034091	The gene mrj is referred to in FlyBase by the symbol Dmel\mrj (CG8448, FBgn0034091). It is a protein_coding_gene from Drosophila melanogaster. It has 8 annotated transcripts and 8 polypeptides (3 unique). Gene sequence location is 2R:16203329..16221793. It has the cytological map location 52F8-52F11. Protein features are: DnaJ domain; DnaJ domain, conserved site. Its molecular function is describ…
FBtr0332855	2R_12102244_SNP	A	G	0.09659	17	159	4.25e-05	4.24e-05	0.79905	2R_12102244_SNP	G	SiteClass[FBgn0034091|mrj|INTRON|0],TranscriptAnnot[INTRON(MODIFIER||||346|mrj|protein_coding|CODING|FBtr0332855|2|1);INTRON(MODIFIER||||259|mrj|protein_coding|CODING|FBtr0087193|1|1)]	-
FBtr0087193	2R_12102244_SNP	A	G	0.09659	17	159	4.25e-05	4.24e-05	0.79905	2R_12102244_SNP	G	SiteClass[FBgn0034091|mrj|INTRON|0],TranscriptAnnot[INTRON(MODIFIER||||346|mrj|protein_coding|CODING|FBtr0332855|2|1);INTRON(MODIFIER||||259|mrj|protein_coding|CODING|FBtr0087193|1|1)]	-
FBgn0264678	X_12619138_SNP	G	C	0.1356	24	153	6.79e-05	4.69e-05	0.79905	X_12619138_SNP	C	SiteClass[FBgn0264678|CR43963|INTRON|0;FBgn0265523|Smr|INTRON|0],TranscriptAnnot[INTRON(MODIFIER||||3601|Smr|protein_coding|CODING|FBtr0333765|2|1);INTRON(MODIFIER||||3601|Smr|protein_coding|CODING|FBtr0333766|3|1);INTRON(MODIFIER||||3601|Smr|protein_coding|CODING|FBtr0333767|2|1);INTRON(MODIFIER||||3607|Smr|protein_coding|CODING|FBtr0333768|3|1);INTRON(MODIFIER|||||CR43963|ncRNA|NON_CODING|FBtr0…	(TF_binding_site|BDTNP1_TFBS_dl|FBsf0000318658);(TF_binding_site|BDTNP1_TFBS_Med|FBsf0000288540);(TF_binding_site|BDTNP1_TFBS_twi|FBsf0000205824);(TF_binding_site|mE1_TFBS_HSA|FBsf0000381926);(TF_binding_site|mE1_TFBS_zfh1|FBsf0000335192)	FBgn0264678	This	gene	is	referred	to	in	FlyBase	by	the	symbol	Dmel\CR43963	(FBgn0264678).	It	is	a	non_protein_coding_gene	from	Drosophila	melanogaster.	It	has	2	annotated	transcripts.	Gene	sequence	location	is	X:12717624..12730953.	It	has	the	cytological	map	location
FBgn0265523	X_12619138_SNP	G	C	0.1356	24	153	6.79e-05	4.69e-05	0.79905	X_12619138_SNP	C	SiteClass[FBgn0264678|CR43963|INTRON|0;FBgn0265523|Smr|INTRON|0],TranscriptAnnot[INTRON(MODIFIER||||3601|Smr|protein_coding|CODING|FBtr0333765|2|1);INTRON(MODIFIER||||3601|Smr|protein_coding|CODING|FBtr0333766|3|1);INTRON(MODIFIER||||3601|Smr|protein_coding|CODING|FBtr0333767|2|1);INTRON(MODIFIER||||3607|Smr|protein_coding|CODING|FBtr0333768|3|1);INTRON(MODIFIER|||||CR43963|ncRNA|NON_CODING|FBtr0…	(TF_binding_site|BDTNP1_TFBS_dl|FBsf0000318658);(TF_binding_site|BDTNP1_TFBS_Med|FBsf0000288540);(TF_binding_site|BDTNP1_TFBS_twi|FBsf0000205824);(TF_binding_site|mE1_TFBS_HSA|FBsf0000381926);(TF_binding_site|mE1_TFBS_zfh1|FBsf0000335192)	FBgn0265523	The gene Smrter is referred to in FlyBase by the symbol Dmel\Smr (CG4013, FBgn0265523). It is a protein_coding_gene from Drosophila melanogaster. It has 4 annotated transcripts and 4 polypeptides (2 unique). Gene sequence location is X:12684203..12742618. It has the cytological map location 11B10-11B14. Protein features are: Homeodomain-like; SANT domain; SANT/Myb domain. Its molecular function i…
FBtr0333765	X_12619138_SNP	G	C	0.1356	24	153	6.79e-05	4.69e-05	0.79905	X_12619138_SNP	C	SiteClass[FBgn0264678|CR43963|INTRON|0;FBgn0265523|Smr|INTRON|0],TranscriptAnnot[INTRON(MODIFIER||||3601|Smr|protein_coding|CODING|FBtr0333765|2|1);INTRON(MODIFIER||||3601|Smr|protein_coding|CODING|FBtr0333766|3|1);INTRON(MODIFIER||||3601|Smr|protein_coding|CODING|FBtr0333767|2|1);INTRON(MODIFIER||||3607|Smr|protein_coding|CODING|FBtr0333768|3|1);INTRON(MODIFIER|||||CR43963|ncRNA|NON_CODING|FBtr0…	(TF_binding_site|BDTNP1_TFBS_dl|FBsf0000318658);(TF_binding_site|BDTNP1_TFBS_Med|FBsf0000288540);(TF_binding_site|BDTNP1_TFBS_twi|FBsf0000205824);(TF_binding_site|mE1_TFBS_HSA|FBsf0000381926);(TF_binding_site|mE1_TFBS_zfh1|FBsf0000335192)
FBtr0333766	X_12619138_SNP	G	C	0.1356	24	153	6.79e-05	4.69e-05	0.79905	X_12619138_SNP	C	SiteClass[FBgn0264678|CR43963|INTRON|0;FBgn0265523|Smr|INTRON|0],TranscriptAnnot[INTRON(MODIFIER||||3601|Smr|protein_coding|CODING|FBtr0333765|2|1);INTRON(MODIFIER||||3601|Smr|protein_coding|CODING|FBtr0333766|3|1);INTRON(MODIFIER||||3601|Smr|protein_coding|CODING|FBtr0333767|2|1);INTRON(MODIFIER||||3607|Smr|protein_coding|CODING|FBtr0333768|3|1);INTRON(MODIFIER|||||CR43963|ncRNA|NON_CODING|FBtr0…	(TF_binding_site|BDTNP1_TFBS_dl|FBsf0000318658);(TF_binding_site|BDTNP1_TFBS_Med|FBsf0000288540);(TF_binding_site|BDTNP1_TFBS_twi|FBsf0000205824);(TF_binding_site|mE1_TFBS_HSA|FBsf0000381926);(TF_binding_site|mE1_TFBS_zfh1|FBsf0000335192)
FBtr0333767	X_12619138_SNP	G	C	0.1356	24	153	6.79e-05	4.69e-05	0.79905	X_12619138_SNP	C	SiteClass[FBgn0264678|CR43963|INTRON|0;FBgn0265523|Smr|INTRON|0],TranscriptAnnot[INTRON(MODIFIER||||3601|Smr|protein_coding|CODING|FBtr0333765|2|1);INTRON(MODIFIER||||3601|Smr|protein_coding|CODING|FBtr0333766|3|1);INTRON(MODIFIER||||3601|Smr|protein_coding|CODING|FBtr0333767|2|1);INTRON(MODIFIER||||3607|Smr|protein_coding|CODING|FBtr0333768|3|1);INTRON(MODIFIER|||||CR43963|ncRNA|NON_CODING|FBtr0…	(TF_binding_site|BDTNP1_TFBS_dl|FBsf0000318658);(TF_binding_site|BDTNP1_TFBS_Med|FBsf0000288540);(TF_binding_site|BDTNP1_TFBS_twi|FBsf0000205824);(TF_binding_site|mE1_TFBS_HSA|FBsf0000381926);(TF_binding_site|mE1_TFBS_zfh1|FBsf0000335192)
FBtr0333768	X_12619138_SNP	G	C	0.1356	24	153	6.79e-05	4.69e-05	0.79905	X_12619138_SNP	C	SiteClass[FBgn0264678|CR43963|INTRON|0;FBgn0265523|Smr|INTRON|0],TranscriptAnnot[INTRON(MODIFIER||||3601|Smr|protein_coding|CODING|FBtr0333765|2|1);INTRON(MODIFIER||||3601|Smr|protein_coding|CODING|FBtr0333766|3|1);INTRON(MODIFIER||||3601|Smr|protein_coding|CODING|FBtr0333767|2|1);INTRON(MODIFIER||||3607|Smr|protein_coding|CODING|FBtr0333768|3|1);INTRON(MODIFIER|||||CR43963|ncRNA|NON_CODING|FBtr0…	(TF_binding_site|BDTNP1_TFBS_dl|FBsf0000318658);(TF_binding_site|BDTNP1_TFBS_Med|FBsf0000288540);(TF_binding_site|BDTNP1_TFBS_twi|FBsf0000205824);(TF_binding_site|mE1_TFBS_HSA|FBsf0000381926);(TF_binding_site|mE1_TFBS_zfh1|FBsf0000335192)
FBtr0333774	X_12619138_SNP	G	C	0.1356	24	153	6.79e-05	4.69e-05	0.79905	X_12619138_SNP	C	SiteClass[FBgn0264678|CR43963|INTRON|0;FBgn0265523|Smr|INTRON|0],TranscriptAnnot[INTRON(MODIFIER||||3601|Smr|protein_coding|CODING|FBtr0333765|2|1);INTRON(MODIFIER||||3601|Smr|protein_coding|CODING|FBtr0333766|3|1);INTRON(MODIFIER||||3601|Smr|protein_coding|CODING|FBtr0333767|2|1);INTRON(MODIFIER||||3607|Smr|protein_coding|CODING|FBtr0333768|3|1);INTRON(MODIFIER|||||CR43963|ncRNA|NON_CODING|FBtr0…	(TF_binding_site|BDTNP1_TFBS_dl|FBsf0000318658);(TF_binding_site|BDTNP1_TFBS_Med|FBsf0000288540);(TF_binding_site|BDTNP1_TFBS_twi|FBsf0000205824);(TF_binding_site|mE1_TFBS_HSA|FBsf0000381926);(TF_binding_site|mE1_TFBS_zfh1|FBsf0000335192)
FBgn0053144	2R_6669531_SNP	A	C	0.06897	12	162	7.27e-05	4.73e-05	0.79905	2R_6669531_SNP	C	SiteClass[FBgn0053144|CG33144|INTRON|0;FBgn0265345|CR44299|UPSTREAM|869],TranscriptAnnot[UPSTREAM(MODIFIER||869|||CR44299|ncRNA|NON_CODING|FBtr0344612||1);INTRON(MODIFIER||||1102|CG33144|protein_coding|CODING|FBtr0088254|1|1);INTRON(MODIFIER||||1102|CG33144|protein_coding|CODING|FBtr0302517|2|1)]	(TF_binding_site|BDTNP1_TFBS_da|FBsf0000323763);(TF_binding_site|BDTNP1_TFBS_dl|FBsf0000301217);(TF_binding_site|BDTNP1_TFBS_twi|FBsf0000198986);(TF_binding_site|mE1_TFBS_cad|FBsf0000246303);(TF_binding_site|mE1_TFBS_D|FBsf0000240505);(TF_binding_site|mE1_TFBS_HSA|FBsf0000355397);(TF_binding_site|mE1_TFBS_Trl|FBsf0000338332);(TF_binding_site|mE1_TFBS_Ubx|FBsf0000263016)	FBgn0053144	This gene is referred to in FlyBase by the symbol Dmel\CG33144 (FBgn0053144). It is a protein_coding_gene from Drosophila melanogaster. It has 2 annotated transcripts and 2 polypeptides (1 unique). Gene sequence location is 2R:10740054..10798709. It has the cytological map location 47B9-47B14. Protein features are: E3 ubiquitin ligase RBR family; IBR domain; Zinc finger, RING-type; Zinc finger, R…
FBgn0265345	2R_6669531_SNP	A	C	0.06897	12	162	7.27e-05	4.73e-05	0.79905	2R_6669531_SNP	C	SiteClass[FBgn0053144|CG33144|INTRON|0;FBgn0265345|CR44299|UPSTREAM|869],TranscriptAnnot[UPSTREAM(MODIFIER||869|||CR44299|ncRNA|NON_CODING|FBtr0344612||1);INTRON(MODIFIER||||1102|CG33144|protein_coding|CODING|FBtr0088254|1|1);INTRON(MODIFIER||||1102|CG33144|protein_coding|CODING|FBtr0302517|2|1)]	(TF_binding_site|BDTNP1_TFBS_da|FBsf0000323763);(TF_binding_site|BDTNP1_TFBS_dl|FBsf0000301217);(TF_binding_site|BDTNP1_TFBS_twi|FBsf0000198986);(TF_binding_site|mE1_TFBS_cad|FBsf0000246303);(TF_binding_site|mE1_TFBS_D|FBsf0000240505);(TF_binding_site|mE1_TFBS_HSA|FBsf0000355397);(TF_binding_site|mE1_TFBS_Trl|FBsf0000338332);(TF_binding_site|mE1_TFBS_Ubx|FBsf0000263016)	FBgn0265345	This	gene	is	referred	to	in	FlyBase	by	the	symbol	Dmel\CR44299	(FBgn0265345).	It	is	a	non_protein_coding_gene	from	Drosophila	melanogaster.	It	has	one	annotated	transcript.	Gene	sequence	location	is	2R:10782895..10785597.	It	has	the	cytological	map	location
FBtr0344612	2R_6669531_SNP	A	C	0.06897	12	162	7.27e-05	4.73e-05	0.79905	2R_6669531_SNP	C	SiteClass[FBgn0053144|CG33144|INTRON|0;FBgn0265345|CR44299|UPSTREAM|869],TranscriptAnnot[UPSTREAM(MODIFIER||869|||CR44299|ncRNA|NON_CODING|FBtr0344612||1);INTRON(MODIFIER||||1102|CG33144|protein_coding|CODING|FBtr0088254|1|1);INTRON(MODIFIER||||1102|CG33144|protein_coding|CODING|FBtr0302517|2|1)]	(TF_binding_site|BDTNP1_TFBS_da|FBsf0000323763);(TF_binding_site|BDTNP1_TFBS_dl|FBsf0000301217);(TF_binding_site|BDTNP1_TFBS_twi|FBsf0000198986);(TF_binding_site|mE1_TFBS_cad|FBsf0000246303);(TF_binding_site|mE1_TFBS_D|FBsf0000240505);(TF_binding_site|mE1_TFBS_HSA|FBsf0000355397);(TF_binding_site|mE1_TFBS_Trl|FBsf0000338332);(TF_binding_site|mE1_TFBS_Ubx|FBsf0000263016)
FBtr0088254	2R_6669531_SNP	A	C	0.06897	12	162	7.27e-05	4.73e-05	0.79905	2R_6669531_SNP	C	SiteClass[FBgn0053144|CG33144|INTRON|0;FBgn0265345|CR44299|UPSTREAM|869],TranscriptAnnot[UPSTREAM(MODIFIER||869|||CR44299|ncRNA|NON_CODING|FBtr0344612||1);INTRON(MODIFIER||||1102|CG33144|protein_coding|CODING|FBtr0088254|1|1);INTRON(MODIFIER||||1102|CG33144|protein_coding|CODING|FBtr0302517|2|1)]	(TF_binding_site|BDTNP1_TFBS_da|FBsf0000323763);(TF_binding_site|BDTNP1_TFBS_dl|FBsf0000301217);(TF_binding_site|BDTNP1_TFBS_twi|FBsf0000198986);(TF_binding_site|mE1_TFBS_cad|FBsf0000246303);(TF_binding_site|mE1_TFBS_D|FBsf0000240505);(TF_binding_site|mE1_TFBS_HSA|FBsf0000355397);(TF_binding_site|mE1_TFBS_Trl|FBsf0000338332);(TF_binding_site|mE1_TFBS_Ubx|FBsf0000263016)
FBtr0302517	2R_6669531_SNP	A	C	0.06897	12	162	7.27e-05	4.73e-05	0.79905	2R_6669531_SNP	C	SiteClass[FBgn0053144|CG33144|INTRON|0;FBgn0265345|CR44299|UPSTREAM|869],TranscriptAnnot[UPSTREAM(MODIFIER||869|||CR44299|ncRNA|NON_CODING|FBtr0344612||1);INTRON(MODIFIER||||1102|CG33144|protein_coding|CODING|FBtr0088254|1|1);INTRON(MODIFIER||||1102|CG33144|protein_coding|CODING|FBtr0302517|2|1)]	(TF_binding_site|BDTNP1_TFBS_da|FBsf0000323763);(TF_binding_site|BDTNP1_TFBS_dl|FBsf0000301217);(TF_binding_site|BDTNP1_TFBS_twi|FBsf0000198986);(TF_binding_site|mE1_TFBS_cad|FBsf0000246303);(TF_binding_site|mE1_TFBS_D|FBsf0000240505);(TF_binding_site|mE1_TFBS_HSA|FBsf0000355397);(TF_binding_site|mE1_TFBS_Trl|FBsf0000338332);(TF_binding_site|mE1_TFBS_Ubx|FBsf0000263016)
FBgn0265346	2R_6673485_SNP	T	C	0.1214	21	152	7.8e-05	4.74e-05	0.79905	2R_6673485_SNP	C	SiteClass[FBgn0265346|CR44300|EXON|0;FBgn0053144|CG33144|INTRON|0;FBgn0265347|CR44301|DOWNSTREAM|215;FBgn0265345|CR44299|DOWNSTREAM|383],TranscriptAnnot[DOWNSTREAM(MODIFIER||215|||CR44301|ncRNA|NON_CODING|FBtr0339468||1);DOWNSTREAM(MODIFIER||383|||CR44299|ncRNA|NON_CODING|FBtr0344612||1);INTRON(MODIFIER||||1102|CG33144|protein_coding|CODING|FBtr0302517|2|1);EXON(MODIFIER|||||CR44300|ncRNA|NON_COD…	-	FBgn0265346	This	gene	is	referred	to	in	FlyBase	by	the	symbol	Dmel\CR44300	(FBgn0265346).	It	is	a	non_protein_coding_gene	from	Drosophila	melanogaster.	It	has	one	annotated	transcript.	Gene	sequence	location	is	2R:10785714..10786026.	It	has	the	cytological	map	location
FBgn0053144	2R_6673485_SNP	T	C	0.1214	21	152	7.8e-05	4.74e-05	0.79905	2R_6673485_SNP	C	SiteClass[FBgn0265346|CR44300|EXON|0;FBgn0053144|CG33144|INTRON|0;FBgn0265347|CR44301|DOWNSTREAM|215;FBgn0265345|CR44299|DOWNSTREAM|383],TranscriptAnnot[DOWNSTREAM(MODIFIER||215|||CR44301|ncRNA|NON_CODING|FBtr0339468||1);DOWNSTREAM(MODIFIER||383|||CR44299|ncRNA|NON_CODING|FBtr0344612||1);INTRON(MODIFIER||||1102|CG33144|protein_coding|CODING|FBtr0302517|2|1);EXON(MODIFIER|||||CR44300|ncRNA|NON_COD…	-	FBgn0053144	This gene is referred to in FlyBase by the symbol Dmel\CG33144 (FBgn0053144). It is a protein_coding_gene from Drosophila melanogaster. It has 2 annotated transcripts and 2 polypeptides (1 unique). Gene sequence location is 2R:10740054..10798709. It has the cytological map location 47B9-47B14. Protein features are: E3 ubiquitin ligase RBR family; IBR domain; Zinc finger, RING-type; Zinc finger, R…
FBgn0265347	2R_6673485_SNP	T	C	0.1214	21	152	7.8e-05	4.74e-05	0.79905	2R_6673485_SNP	C	SiteClass[FBgn0265346|CR44300|EXON|0;FBgn0053144|CG33144|INTRON|0;FBgn0265347|CR44301|DOWNSTREAM|215;FBgn0265345|CR44299|DOWNSTREAM|383],TranscriptAnnot[DOWNSTREAM(MODIFIER||215|||CR44301|ncRNA|NON_CODING|FBtr0339468||1);DOWNSTREAM(MODIFIER||383|||CR44299|ncRNA|NON_CODING|FBtr0344612||1);INTRON(MODIFIER||||1102|CG33144|protein_coding|CODING|FBtr0302517|2|1);EXON(MODIFIER|||||CR44300|ncRNA|NON_COD…	-	FBgn0265347	This	gene	is	referred	to	in	FlyBase	by	the	symbol	Dmel\CR44301	(FBgn0265347).	It	is	a	non_protein_coding_gene	from	Drosophila	melanogaster.	It	has	one	annotated	transcript.	Gene	sequence	location	is	2R:10786195..10786493.	It	has	the	cytological	map	location
FBgn0265345	2R_6673485_SNP	T	C	0.1214	21	152	7.8e-05	4.74e-05	0.79905	2R_6673485_SNP	C	SiteClass[FBgn0265346|CR44300|EXON|0;FBgn0053144|CG33144|INTRON|0;FBgn0265347|CR44301|DOWNSTREAM|215;FBgn0265345|CR44299|DOWNSTREAM|383],TranscriptAnnot[DOWNSTREAM(MODIFIER||215|||CR44301|ncRNA|NON_CODING|FBtr0339468||1);DOWNSTREAM(MODIFIER||383|||CR44299|ncRNA|NON_CODING|FBtr0344612||1);INTRON(MODIFIER||||1102|CG33144|protein_coding|CODING|FBtr0302517|2|1);EXON(MODIFIER|||||CR44300|ncRNA|NON_COD…	-	FBgn0265345	This	gene	is	referred	to	in	FlyBase	by	the	symbol	Dmel\CR44299	(FBgn0265345).	It	is	a	non_protein_coding_gene	from	Drosophila	melanogaster.	It	has	one	annotated	transcript.	Gene	sequence	location	is	2R:10782895..10785597.	It	has	the	cytological	map	location
FBtr0339468	2R_6673485_SNP	T	C	0.1214	21	152	7.8e-05	4.74e-05	0.79905	2R_6673485_SNP	C	SiteClass[FBgn0265346|CR44300|EXON|0;FBgn0053144|CG33144|INTRON|0;FBgn0265347|CR44301|DOWNSTREAM|215;FBgn0265345|CR44299|DOWNSTREAM|383],TranscriptAnnot[DOWNSTREAM(MODIFIER||215|||CR44301|ncRNA|NON_CODING|FBtr0339468||1);DOWNSTREAM(MODIFIER||383|||CR44299|ncRNA|NON_CODING|FBtr0344612||1);INTRON(MODIFIER||||1102|CG33144|protein_coding|CODING|FBtr0302517|2|1);EXON(MODIFIER|||||CR44300|ncRNA|NON_COD…	-
FBtr0344612	2R_6673485_SNP	T	C	0.1214	21	152	7.8e-05	4.74e-05	0.79905	2R_6673485_SNP	C	SiteClass[FBgn0265346|CR44300|EXON|0;FBgn0053144|CG33144|INTRON|0;FBgn0265347|CR44301|DOWNSTREAM|215;FBgn0265345|CR44299|DOWNSTREAM|383],TranscriptAnnot[DOWNSTREAM(MODIFIER||215|||CR44301|ncRNA|NON_CODING|FBtr0339468||1);DOWNSTREAM(MODIFIER||383|||CR44299|ncRNA|NON_CODING|FBtr0344612||1);INTRON(MODIFIER||||1102|CG33144|protein_coding|CODING|FBtr0302517|2|1);EXON(MODIFIER|||||CR44300|ncRNA|NON_COD…	-
FBtr0302517	2R_6673485_SNP	T	C	0.1214	21	152	7.8e-05	4.74e-05	0.79905	2R_6673485_SNP	C	SiteClass[FBgn0265346|CR44300|EXON|0;FBgn0053144|CG33144|INTRON|0;FBgn0265347|CR44301|DOWNSTREAM|215;FBgn0265345|CR44299|DOWNSTREAM|383],TranscriptAnnot[DOWNSTREAM(MODIFIER||215|||CR44301|ncRNA|NON_CODING|FBtr0339468||1);DOWNSTREAM(MODIFIER||383|||CR44299|ncRNA|NON_CODING|FBtr0344612||1);INTRON(MODIFIER||||1102|CG33144|protein_coding|CODING|FBtr0302517|2|1);EXON(MODIFIER|||||CR44300|ncRNA|NON_COD…	-
FBtr0339469	2R_6673485_SNP	T	C	0.1214	21	152	7.8e-05	4.74e-05	0.79905	2R_6673485_SNP	C	SiteClass[FBgn0265346|CR44300|EXON|0;FBgn0053144|CG33144|INTRON|0;FBgn0265347|CR44301|DOWNSTREAM|215;FBgn0265345|CR44299|DOWNSTREAM|383],TranscriptAnnot[DOWNSTREAM(MODIFIER||215|||CR44301|ncRNA|NON_CODING|FBtr0339468||1);DOWNSTREAM(MODIFIER||383|||CR44299|ncRNA|NON_CODING|FBtr0344612||1);INTRON(MODIFIER||||1102|CG33144|protein_coding|CODING|FBtr0302517|2|1);EXON(MODIFIER|||||CR44300|ncRNA|NON_COD…	-
FBgn0053970	3R_22156056_DEL	T	TT	0.2715	41	110	7.52e-05	4.74e-05	0.79905	3R_22156056_DEL	TT	SiteClass[FBgn0053970|CG33970|INTRON|0],TranscriptAnnot[INTRON(MODIFIER||||777|CG33970|protein_coding|CODING|FBtr0100012|1|1);INTRON(MODIFIER||||777|CG33970|protein_coding|CODING|FBtr0346107|1|1)]	-	FBgn0053970	This gene is referred to in FlyBase by the symbol Dmel\CG33970 (FBgn0053970). It is a protein_coding_gene from Drosophila melanogaster. It has 3 annotated transcripts and 3 polypeptides (2 unique). Gene sequence location is 3R:26318355..26362588. It has the cytological map location 97A8-97A10. Protein features are: AAA+ ATPase domain; ABC transporter, conserved site; ABC transporter-like; ABC-2 t…
FBtr0100012	3R_22156056_DEL	T	TT	0.2715	41	110	7.52e-05	4.74e-05	0.79905	3R_22156056_DEL	TT	SiteClass[FBgn0053970|CG33970|INTRON|0],TranscriptAnnot[INTRON(MODIFIER||||777|CG33970|protein_coding|CODING|FBtr0100012|1|1);INTRON(MODIFIER||||777|CG33970|protein_coding|CODING|FBtr0346107|1|1)]	-
FBtr0346107	3R_22156056_DEL	T	TT	0.2715	41	110	7.52e-05	4.74e-05	0.79905	3R_22156056_DEL	TT	SiteClass[FBgn0053970|CG33970|INTRON|0],TranscriptAnnot[INTRON(MODIFIER||||777|CG33970|protein_coding|CODING|FBtr0100012|1|1);INTRON(MODIFIER||||777|CG33970|protein_coding|CODING|FBtr0346107|1|1)]	-
FBgn0003165	3R_5027206_DEL	AGGGGCGA	A	0.1879	28	121	6.09e-05	4.79e-05	0.79905	3R_5027206_DEL	AGGGGCGA	SiteClass[FBgn0003165|pum|INTRON|0],TranscriptAnnot[INTRON(MODIFIER||||1533|pum|protein_coding|CODING|FBtr0081990|8|1);INTRON(MODIFIER||||1533|pum|protein_coding|CODING|FBtr0081991|8|1);INTRON(MODIFIER||||1533|pum|protein_coding|CODING|FBtr0081992|8|1);INTRON(MODIFIER||||1185|pum|protein_coding|CODING|FBtr0081993|6|1);INTRON(MODIFIER||||1533|pum|protein_coding|CODING|FBtr0333667|8|1)]	(TF_binding_site|mE1_TFBS_HSA|FBsf0000369836);(TF_binding_site|mE1_TFBS_inv|FBsf0000237059)	FBgn0003165	The gene pumilio is referred to in FlyBase by the symbol Dmel\pum (CG9755, FBgn0003165). It is a protein_coding_gene from Drosophila melanogaster. It has 8 annotated transcripts and 8 polypeptides (5 unique). Gene sequence location is 3R:9066343..9237682. It has the cytological map location 85C4-85D1. Protein features are: Armadillo-like helical; Armadillo-type fold; Pumilio RNA-binding repeat. I…
FBtr0081990	3R_5027206_DEL	AGGGGCGA	A	0.1879	28	121	6.09e-05	4.79e-05	0.79905	3R_5027206_DEL	AGGGGCGA	SiteClass[FBgn0003165|pum|INTRON|0],TranscriptAnnot[INTRON(MODIFIER||||1533|pum|protein_coding|CODING|FBtr0081990|8|1);INTRON(MODIFIER||||1533|pum|protein_coding|CODING|FBtr0081991|8|1);INTRON(MODIFIER||||1533|pum|protein_coding|CODING|FBtr0081992|8|1);INTRON(MODIFIER||||1185|pum|protein_coding|CODING|FBtr0081993|6|1);INTRON(MODIFIER||||1533|pum|protein_coding|CODING|FBtr0333667|8|1)]	(TF_binding_site|mE1_TFBS_HSA|FBsf0000369836);(TF_binding_site|mE1_TFBS_inv|FBsf0000237059)
FBtr0081991	3R_5027206_DEL	AGGGGCGA	A	0.1879	28	121	6.09e-05	4.79e-05	0.79905	3R_5027206_DEL	AGGGGCGA	SiteClass[FBgn0003165|pum|INTRON|0],TranscriptAnnot[INTRON(MODIFIER||||1533|pum|protein_coding|CODING|FBtr0081990|8|1);INTRON(MODIFIER||||1533|pum|protein_coding|CODING|FBtr0081991|8|1);INTRON(MODIFIER||||1533|pum|protein_coding|CODING|FBtr0081992|8|1);INTRON(MODIFIER||||1185|pum|protein_coding|CODING|FBtr0081993|6|1);INTRON(MODIFIER||||1533|pum|protein_coding|CODING|FBtr0333667|8|1)]	(TF_binding_site|mE1_TFBS_HSA|FBsf0000369836);(TF_binding_site|mE1_TFBS_inv|FBsf0000237059)
FBtr0081992	3R_5027206_DEL	AGGGGCGA	A	0.1879	28	121	6.09e-05	4.79e-05	0.79905	3R_5027206_DEL	AGGGGCGA	SiteClass[FBgn0003165|pum|INTRON|0],TranscriptAnnot[INTRON(MODIFIER||||1533|pum|protein_coding|CODING|FBtr0081990|8|1);INTRON(MODIFIER||||1533|pum|protein_coding|CODING|FBtr0081991|8|1);INTRON(MODIFIER||||1533|pum|protein_coding|CODING|FBtr0081992|8|1);INTRON(MODIFIER||||1185|pum|protein_coding|CODING|FBtr0081993|6|1);INTRON(MODIFIER||||1533|pum|protein_coding|CODING|FBtr0333667|8|1)]	(TF_binding_site|mE1_TFBS_HSA|FBsf0000369836);(TF_binding_site|mE1_TFBS_inv|FBsf0000237059)
FBtr0081993	3R_5027206_DEL	AGGGGCGA	A	0.1879	28	121	6.09e-05	4.79e-05	0.79905	3R_5027206_DEL	AGGGGCGA	SiteClass[FBgn0003165|pum|INTRON|0],TranscriptAnnot[INTRON(MODIFIER||||1533|pum|protein_coding|CODING|FBtr0081990|8|1);INTRON(MODIFIER||||1533|pum|protein_coding|CODING|FBtr0081991|8|1);INTRON(MODIFIER||||1533|pum|protein_coding|CODING|FBtr0081992|8|1);INTRON(MODIFIER||||1185|pum|protein_coding|CODING|FBtr0081993|6|1);INTRON(MODIFIER||||1533|pum|protein_coding|CODING|FBtr0333667|8|1)]	(TF_binding_site|mE1_TFBS_HSA|FBsf0000369836);(TF_binding_site|mE1_TFBS_inv|FBsf0000237059)
FBtr0333667	3R_5027206_DEL	AGGGGCGA	A	0.1879	28	121	6.09e-05	4.79e-05	0.79905	3R_5027206_DEL	AGGGGCGA	SiteClass[FBgn0003165|pum|INTRON|0],TranscriptAnnot[INTRON(MODIFIER||||1533|pum|protein_coding|CODING|FBtr0081990|8|1);INTRON(MODIFIER||||1533|pum|protein_coding|CODING|FBtr0081991|8|1);INTRON(MODIFIER||||1533|pum|protein_coding|CODING|FBtr0081992|8|1);INTRON(MODIFIER||||1185|pum|protein_coding|CODING|FBtr0081993|6|1);INTRON(MODIFIER||||1533|pum|protein_coding|CODING|FBtr0333667|8|1)]	(TF_binding_site|mE1_TFBS_HSA|FBsf0000369836);(TF_binding_site|mE1_TFBS_inv|FBsf0000237059)
FBgn0036417	3L_14229560_SNP	G	A	0.2034	36	141	5.25e-05	4.8e-05	0.79905	3L_14229560_SNP	A	SiteClass[FBgn0036417|CG7906|UPSTREAM|175;FBgn0085273|CG34244|UPSTREAM|519],TranscriptAnnot[UPSTREAM(MODIFIER||175||356|CG7906|protein_coding|CODING|FBtr0321257||1);UPSTREAM(MODIFIER||740||112|CG34244|protein_coding|CODING|FBtr0112438||1);UPSTREAM(MODIFIER||264||354|CG7906|protein_coding|CODING|FBtr0075741||1);UPSTREAM(MODIFIER||519||112|CG34244|protein_coding|CODING|FBtr0333033||1);INTERGENIC(MO…	-	FBgn0036417	This	gene	is	referred	to	in	FlyBase	by	the	symbol	Dmel\CG7906	(FBgn0036417).	It	is	a	protein_coding_gene	from	Drosophila	melanogaster.	It	has	2	annotated	transcripts	and	2	polypeptides	(all	unique).	Gene	sequence	location	is	3L:14236635..14238272.	It
FBgn0085273	3L_14229560_SNP	G	A	0.2034	36	141	5.25e-05	4.8e-05	0.79905	3L_14229560_SNP	A	SiteClass[FBgn0036417|CG7906|UPSTREAM|175;FBgn0085273|CG34244|UPSTREAM|519],TranscriptAnnot[UPSTREAM(MODIFIER||175||356|CG7906|protein_coding|CODING|FBtr0321257||1);UPSTREAM(MODIFIER||740||112|CG34244|protein_coding|CODING|FBtr0112438||1);UPSTREAM(MODIFIER||264||354|CG7906|protein_coding|CODING|FBtr0075741||1);UPSTREAM(MODIFIER||519||112|CG34244|protein_coding|CODING|FBtr0333033||1);INTERGENIC(MO…	-	FBgn0085273	This	gene	is	referred	to	in	FlyBase	by	the	symbol	Dmel\CG34244	(FBgn0085273).	It	is	a	protein_coding_gene	from	Drosophila	melanogaster.	It	has	2	annotated	transcripts	and	2	polypeptides	(1	unique).	Gene	sequence	location	is	3L:14235053..14235941.	It
FBtr0321257	3L_14229560_SNP	G	A	0.2034	36	141	5.25e-05	4.8e-05	0.79905	3L_14229560_SNP	A	SiteClass[FBgn0036417|CG7906|UPSTREAM|175;FBgn0085273|CG34244|UPSTREAM|519],TranscriptAnnot[UPSTREAM(MODIFIER||175||356|CG7906|protein_coding|CODING|FBtr0321257||1);UPSTREAM(MODIFIER||740||112|CG34244|protein_coding|CODING|FBtr0112438||1);UPSTREAM(MODIFIER||264||354|CG7906|protein_coding|CODING|FBtr0075741||1);UPSTREAM(MODIFIER||519||112|CG34244|protein_coding|CODING|FBtr0333033||1);INTERGENIC(MO…	-
FBtr0112438	3L_14229560_SNP	G	A	0.2034	36	141	5.25e-05	4.8e-05	0.79905	3L_14229560_SNP	A	SiteClass[FBgn0036417|CG7906|UPSTREAM|175;FBgn0085273|CG34244|UPSTREAM|519],TranscriptAnnot[UPSTREAM(MODIFIER||175||356|CG7906|protein_coding|CODING|FBtr0321257||1);UPSTREAM(MODIFIER||740||112|CG34244|protein_coding|CODING|FBtr0112438||1);UPSTREAM(MODIFIER||264||354|CG7906|protein_coding|CODING|FBtr0075741||1);UPSTREAM(MODIFIER||519||112|CG34244|protein_coding|CODING|FBtr0333033||1);INTERGENIC(MO…	-
FBtr0075741	3L_14229560_SNP	G	A	0.2034	36	141	5.25e-05	4.8e-05	0.79905	3L_14229560_SNP	A	SiteClass[FBgn0036417|CG7906|UPSTREAM|175;FBgn0085273|CG34244|UPSTREAM|519],TranscriptAnnot[UPSTREAM(MODIFIER||175||356|CG7906|protein_coding|CODING|FBtr0321257||1);UPSTREAM(MODIFIER||740||112|CG34244|protein_coding|CODING|FBtr0112438||1);UPSTREAM(MODIFIER||264||354|CG7906|protein_coding|CODING|FBtr0075741||1);UPSTREAM(MODIFIER||519||112|CG34244|protein_coding|CODING|FBtr0333033||1);INTERGENIC(MO…	-
FBtr0333033	3L_14229560_SNP	G	A	0.2034	36	141	5.25e-05	4.8e-05	0.79905	3L_14229560_SNP	A	SiteClass[FBgn0036417|CG7906|UPSTREAM|175;FBgn0085273|CG34244|UPSTREAM|519],TranscriptAnnot[UPSTREAM(MODIFIER||175||356|CG7906|protein_coding|CODING|FBtr0321257||1);UPSTREAM(MODIFIER||740||112|CG34244|protein_coding|CODING|FBtr0112438||1);UPSTREAM(MODIFIER||264||354|CG7906|protein_coding|CODING|FBtr0075741||1);UPSTREAM(MODIFIER||519||112|CG34244|protein_coding|CODING|FBtr0333033||1);INTERGENIC(MO…	-
FBgn0034279	2R_13657696_SNP	T	C	0.3529	60	110	2.12e-05	4.92e-05	0.79905	2R_13657696_SNP	C	SiteClass[FBgn0034279|CG18635|UPSTREAM|202;FBgn0028740|CG6362|DOWNSTREAM|214],TranscriptAnnot[UPSTREAM(MODIFIER||202||649|CG18635|protein_coding|CODING|FBtr0089557||1);DOWNSTREAM(MODIFIER||214||624|CG6362|protein_coding|CODING|FBtr0089556||1);INTERGENIC(MODIFIER||||||||||1)]	(TF_binding_site|BDTNP1_TFBS_da|FBsf0000324570);(TF_binding_site|mE1_TFBS_HSA|FBsf0000357866);(TF_binding_site|mE1_TFBS_HSA|FBsf0000357867)	FBgn0034279	This	gene	is	referred	to	in	FlyBase	by	the	symbol	Dmel\CG18635	(FBgn0034279).	It	is	a	protein_coding_gene	from	Drosophila	melanogaster.	It	has	one	annotated	transcript	and	one	polypeptide.	Gene	sequence	location	is	2R:17767808..17769989.	It	has	the
FBgn0028740	2R_13657696_SNP	T	C	0.3529	60	110	2.12e-05	4.92e-05	0.79905	2R_13657696_SNP	C	SiteClass[FBgn0034279|CG18635|UPSTREAM|202;FBgn0028740|CG6362|DOWNSTREAM|214],TranscriptAnnot[UPSTREAM(MODIFIER||202||649|CG18635|protein_coding|CODING|FBtr0089557||1);DOWNSTREAM(MODIFIER||214||624|CG6362|protein_coding|CODING|FBtr0089556||1);INTERGENIC(MODIFIER||||||||||1)]	(TF_binding_site|BDTNP1_TFBS_da|FBsf0000324570);(TF_binding_site|mE1_TFBS_HSA|FBsf0000357866);(TF_binding_site|mE1_TFBS_HSA|FBsf0000357867)	FBgn0028740	This	gene	is	referred	to	in	FlyBase	by	the	symbol	Dmel\CG6362	(FBgn0028740).	It	is	a	protein_coding_gene	from	Drosophila	melanogaster.	It	has	one	annotated	transcript	and	one	polypeptide.	Gene	sequence	location	is	2R:17770405..17772552.	It	has	the
FBtr0089557	2R_13657696_SNP	T	C	0.3529	60	110	2.12e-05	4.92e-05	0.79905	2R_13657696_SNP	C	SiteClass[FBgn0034279|CG18635|UPSTREAM|202;FBgn0028740|CG6362|DOWNSTREAM|214],TranscriptAnnot[UPSTREAM(MODIFIER||202||649|CG18635|protein_coding|CODING|FBtr0089557||1);DOWNSTREAM(MODIFIER||214||624|CG6362|protein_coding|CODING|FBtr0089556||1);INTERGENIC(MODIFIER||||||||||1)]	(TF_binding_site|BDTNP1_TFBS_da|FBsf0000324570);(TF_binding_site|mE1_TFBS_HSA|FBsf0000357866);(TF_binding_site|mE1_TFBS_HSA|FBsf0000357867)
FBtr0089556	2R_13657696_SNP	T	C	0.3529	60	110	2.12e-05	4.92e-05	0.79905	2R_13657696_SNP	C	SiteClass[FBgn0034279|CG18635|UPSTREAM|202;FBgn0028740|CG6362|DOWNSTREAM|214],TranscriptAnnot[UPSTREAM(MODIFIER||202||649|CG18635|protein_coding|CODING|FBtr0089557||1);DOWNSTREAM(MODIFIER||214||624|CG6362|protein_coding|CODING|FBtr0089556||1);INTERGENIC(MODIFIER||||||||||1)]	(TF_binding_site|BDTNP1_TFBS_da|FBsf0000324570);(TF_binding_site|mE1_TFBS_HSA|FBsf0000357866);(TF_binding_site|mE1_TFBS_HSA|FBsf0000357867)
FBgn0266756	3R_10684231_SNP	A	G	0.05028	9	170	6.1e-05	4.94e-05	0.79905	3R_10684231_SNP	G	SiteClass[FBgn0266756|btsz|INTRON|0],TranscriptAnnot[INTRON(MODIFIER||||1567|btsz|protein_coding|CODING|FBtr0334290|2|1);INTRON(MODIFIER||||1567|btsz|protein_coding|CODING|FBtr0334293|2|1)]	-	FBgn0266756	The gene bitesize is referred to in FlyBase by the symbol Dmel\btsz (CG44012, FBgn0266756). It is a protein_coding_gene from Drosophila melanogaster. It has 9 annotated transcripts and 9 polypeptides (8 unique). Gene sequence location is 3R:14804092..14875488. It has the cytological map location 88D5. Protein features are: C2 domain; Rab-binding domain; Synaptotagmin; Zinc finger, FYVE/PHD-type; …
FBtr0334290	3R_10684231_SNP	A	G	0.05028	9	170	6.1e-05	4.94e-05	0.79905	3R_10684231_SNP	G	SiteClass[FBgn0266756|btsz|INTRON|0],TranscriptAnnot[INTRON(MODIFIER||||1567|btsz|protein_coding|CODING|FBtr0334290|2|1);INTRON(MODIFIER||||1567|btsz|protein_coding|CODING|FBtr0334293|2|1)]	-
FBtr0334293	3R_10684231_SNP	A	G	0.05028	9	170	6.1e-05	4.94e-05	0.79905	3R_10684231_SNP	G	SiteClass[FBgn0266756|btsz|INTRON|0],TranscriptAnnot[INTRON(MODIFIER||||1567|btsz|protein_coding|CODING|FBtr0334290|2|1);INTRON(MODIFIER||||1567|btsz|protein_coding|CODING|FBtr0334293|2|1)]	-
FBgn0032151	2L_9831585_SNP	C	T	0.2299	40	134	6.03e-05	4.97e-05	0.79905	2L_9831585_SNP	C	SiteClass[FBgn0032151|nAChRalpha6|INTRON|0],TranscriptAnnot[INTRON(MODIFIER||||523|nAChRalpha6|protein_coding|CODING|FBtr0079912|2|1);INTRON(MODIFIER||||509|nAChRalpha6|protein_coding|CODING|FBtr0079913|3|1);INTRON(MODIFIER||||494|nAChRalpha6|protein_coding|CODING|FBtr0079914|2|1);INTRON(MODIFIER||||494|nAChRalpha6|protein_coding|CODING|FBtr0079915|3|1);INTRON(MODIFIER||||494|nAChRalpha6|protein_…	-	FBgn0032151	The gene nicotinic Acetylcholine Receptor ??6 is referred to in FlyBase by the symbol Dmel\nAChR??6 (CG4128, FBgn0032151). It is a protein_coding_gene from Drosophila melanogaster. It has 7 annotated transcripts and 7 polypeptides (6 unique). Gene sequence location is 2L:9793317..9886250. It has the cytological map location 30D1-30E1. Protein features are: Neurotransmitter-gated ion-channel; Neur…
FBtr0079912	2L_9831585_SNP	C	T	0.2299	40	134	6.03e-05	4.97e-05	0.79905	2L_9831585_SNP	C	SiteClass[FBgn0032151|nAChRalpha6|INTRON|0],TranscriptAnnot[INTRON(MODIFIER||||523|nAChRalpha6|protein_coding|CODING|FBtr0079912|2|1);INTRON(MODIFIER||||509|nAChRalpha6|protein_coding|CODING|FBtr0079913|3|1);INTRON(MODIFIER||||494|nAChRalpha6|protein_coding|CODING|FBtr0079914|2|1);INTRON(MODIFIER||||494|nAChRalpha6|protein_coding|CODING|FBtr0079915|3|1);INTRON(MODIFIER||||494|nAChRalpha6|protein_…	-
FBtr0079913	2L_9831585_SNP	C	T	0.2299	40	134	6.03e-05	4.97e-05	0.79905	2L_9831585_SNP	C	SiteClass[FBgn0032151|nAChRalpha6|INTRON|0],TranscriptAnnot[INTRON(MODIFIER||||523|nAChRalpha6|protein_coding|CODING|FBtr0079912|2|1);INTRON(MODIFIER||||509|nAChRalpha6|protein_coding|CODING|FBtr0079913|3|1);INTRON(MODIFIER||||494|nAChRalpha6|protein_coding|CODING|FBtr0079914|2|1);INTRON(MODIFIER||||494|nAChRalpha6|protein_coding|CODING|FBtr0079915|3|1);INTRON(MODIFIER||||494|nAChRalpha6|protein_…	-
FBtr0079914	2L_9831585_SNP	C	T	0.2299	40	134	6.03e-05	4.97e-05	0.79905	2L_9831585_SNP	C	SiteClass[FBgn0032151|nAChRalpha6|INTRON|0],TranscriptAnnot[INTRON(MODIFIER||||523|nAChRalpha6|protein_coding|CODING|FBtr0079912|2|1);INTRON(MODIFIER||||509|nAChRalpha6|protein_coding|CODING|FBtr0079913|3|1);INTRON(MODIFIER||||494|nAChRalpha6|protein_coding|CODING|FBtr0079914|2|1);INTRON(MODIFIER||||494|nAChRalpha6|protein_coding|CODING|FBtr0079915|3|1);INTRON(MODIFIER||||494|nAChRalpha6|protein_…	-
FBtr0079915	2L_9831585_SNP	C	T	0.2299	40	134	6.03e-05	4.97e-05	0.79905	2L_9831585_SNP	C	SiteClass[FBgn0032151|nAChRalpha6|INTRON|0],TranscriptAnnot[INTRON(MODIFIER||||523|nAChRalpha6|protein_coding|CODING|FBtr0079912|2|1);INTRON(MODIFIER||||509|nAChRalpha6|protein_coding|CODING|FBtr0079913|3|1);INTRON(MODIFIER||||494|nAChRalpha6|protein_coding|CODING|FBtr0079914|2|1);INTRON(MODIFIER||||494|nAChRalpha6|protein_coding|CODING|FBtr0079915|3|1);INTRON(MODIFIER||||494|nAChRalpha6|protein_…	-
FBtr0079916	2L_9831585_SNP	C	T	0.2299	40	134	6.03e-05	4.97e-05	0.79905	2L_9831585_SNP	C	SiteClass[FBgn0032151|nAChRalpha6|INTRON|0],TranscriptAnnot[INTRON(MODIFIER||||523|nAChRalpha6|protein_coding|CODING|FBtr0079912|2|1);INTRON(MODIFIER||||509|nAChRalpha6|protein_coding|CODING|FBtr0079913|3|1);INTRON(MODIFIER||||494|nAChRalpha6|protein_coding|CODING|FBtr0079914|2|1);INTRON(MODIFIER||||494|nAChRalpha6|protein_coding|CODING|FBtr0079915|3|1);INTRON(MODIFIER||||494|nAChRalpha6|protein_…	-
FBtr0303898	2L_9831585_SNP	C	T	0.2299	40	134	6.03e-05	4.97e-05	0.79905	2L_9831585_SNP	C	SiteClass[FBgn0032151|nAChRalpha6|INTRON|0],TranscriptAnnot[INTRON(MODIFIER||||523|nAChRalpha6|protein_coding|CODING|FBtr0079912|2|1);INTRON(MODIFIER||||509|nAChRalpha6|protein_coding|CODING|FBtr0079913|3|1);INTRON(MODIFIER||||494|nAChRalpha6|protein_coding|CODING|FBtr0079914|2|1);INTRON(MODIFIER||||494|nAChRalpha6|protein_coding|CODING|FBtr0079915|3|1);INTRON(MODIFIER||||494|nAChRalpha6|protein_…	-
FBtr0331284	2L_9831585_SNP	C	T	0.2299	40	134	6.03e-05	4.97e-05	0.79905	2L_9831585_SNP	C	SiteClass[FBgn0032151|nAChRalpha6|INTRON|0],TranscriptAnnot[INTRON(MODIFIER||||523|nAChRalpha6|protein_coding|CODING|FBtr0079912|2|1);INTRON(MODIFIER||||509|nAChRalpha6|protein_coding|CODING|FBtr0079913|3|1);INTRON(MODIFIER||||494|nAChRalpha6|protein_coding|CODING|FBtr0079914|2|1);INTRON(MODIFIER||||494|nAChRalpha6|protein_coding|CODING|FBtr0079915|3|1);INTRON(MODIFIER||||494|nAChRalpha6|protein_…	-
FBgn0034542	2R_16550813_SNP	A	G	0.3626	62	109	4.99e-05	5.27e-05	0.79905	2R_16550813_SNP	G	SiteClass[FBgn0034542|Fem-1|SYNONYMOUS_CODING|0;FBgn0034541|CG13437|DOWNSTREAM|713],TranscriptAnnot[SYNONYMOUS_CODING(LOW|SILENT|acC/acT|T599|702|Fem-1|protein_coding|CODING|FBtr0086245|5|1);SYNONYMOUS_CODING(LOW|SILENT|acC/acT|T547|650|Fem-1|protein_coding|CODING|FBtr0086246|6|1);DOWNSTREAM(MODIFIER||713||149|CG13437|protein_coding|CODING|FBtr0086235||1)]	(TF_binding_site|mE1_TFBS_cad|FBsf0000247098);(TF_binding_site|mE1_TFBS_HSA|FBsf0000358787);(TF_binding_site|mE1_TFBS_sens|FBsf0000229062)	FBgn0034542	The gene Fem-1 is referred to in FlyBase by the symbol Dmel\Fem-1 (CG9025, FBgn0034542). It is a protein_coding_gene from Drosophila melanogaster. It has 2 annotated transcripts and 2 polypeptides (all unique). Gene sequence location is 2R:20662474..20667306. It has the cytological map location 57A9. Protein features are: Ankyrin repeat; Ankyrin repeat-containing domain. Its molecular function is…
FBgn0034541	2R_16550813_SNP	A	G	0.3626	62	109	4.99e-05	5.27e-05	0.79905	2R_16550813_SNP	G	SiteClass[FBgn0034542|Fem-1|SYNONYMOUS_CODING|0;FBgn0034541|CG13437|DOWNSTREAM|713],TranscriptAnnot[SYNONYMOUS_CODING(LOW|SILENT|acC/acT|T599|702|Fem-1|protein_coding|CODING|FBtr0086245|5|1);SYNONYMOUS_CODING(LOW|SILENT|acC/acT|T547|650|Fem-1|protein_coding|CODING|FBtr0086246|6|1);DOWNSTREAM(MODIFIER||713||149|CG13437|protein_coding|CODING|FBtr0086235||1)]	(TF_binding_site|mE1_TFBS_cad|FBsf0000247098);(TF_binding_site|mE1_TFBS_HSA|FBsf0000358787);(TF_binding_site|mE1_TFBS_sens|FBsf0000229062)	FBgn0034541	This	gene	is	referred	to	in	FlyBase	by	the	symbol	Dmel\CG13437	(FBgn0034541).	It	is	a	protein_coding_gene	from	Drosophila	melanogaster.	It	has	one	annotated	transcript	and	one	polypeptide.	Gene	sequence	location	is	2R:20661585..20662595.	It	has	the
FBtr0086245	2R_16550813_SNP	A	G	0.3626	62	109	4.99e-05	5.27e-05	0.79905	2R_16550813_SNP	G	SiteClass[FBgn0034542|Fem-1|SYNONYMOUS_CODING|0;FBgn0034541|CG13437|DOWNSTREAM|713],TranscriptAnnot[SYNONYMOUS_CODING(LOW|SILENT|acC/acT|T599|702|Fem-1|protein_coding|CODING|FBtr0086245|5|1);SYNONYMOUS_CODING(LOW|SILENT|acC/acT|T547|650|Fem-1|protein_coding|CODING|FBtr0086246|6|1);DOWNSTREAM(MODIFIER||713||149|CG13437|protein_coding|CODING|FBtr0086235||1)]	(TF_binding_site|mE1_TFBS_cad|FBsf0000247098);(TF_binding_site|mE1_TFBS_HSA|FBsf0000358787);(TF_binding_site|mE1_TFBS_sens|FBsf0000229062)
FBtr0086246	2R_16550813_SNP	A	G	0.3626	62	109	4.99e-05	5.27e-05	0.79905	2R_16550813_SNP	G	SiteClass[FBgn0034542|Fem-1|SYNONYMOUS_CODING|0;FBgn0034541|CG13437|DOWNSTREAM|713],TranscriptAnnot[SYNONYMOUS_CODING(LOW|SILENT|acC/acT|T599|702|Fem-1|protein_coding|CODING|FBtr0086245|5|1);SYNONYMOUS_CODING(LOW|SILENT|acC/acT|T547|650|Fem-1|protein_coding|CODING|FBtr0086246|6|1);DOWNSTREAM(MODIFIER||713||149|CG13437|protein_coding|CODING|FBtr0086235||1)]	(TF_binding_site|mE1_TFBS_cad|FBsf0000247098);(TF_binding_site|mE1_TFBS_HSA|FBsf0000358787);(TF_binding_site|mE1_TFBS_sens|FBsf0000229062)
FBtr0086235	2R_16550813_SNP	A	G	0.3626	62	109	4.99e-05	5.27e-05	0.79905	2R_16550813_SNP	G	SiteClass[FBgn0034542|Fem-1|SYNONYMOUS_CODING|0;FBgn0034541|CG13437|DOWNSTREAM|713],TranscriptAnnot[SYNONYMOUS_CODING(LOW|SILENT|acC/acT|T599|702|Fem-1|protein_coding|CODING|FBtr0086245|5|1);SYNONYMOUS_CODING(LOW|SILENT|acC/acT|T547|650|Fem-1|protein_coding|CODING|FBtr0086246|6|1);DOWNSTREAM(MODIFIER||713||149|CG13437|protein_coding|CODING|FBtr0086235||1)]	(TF_binding_site|mE1_TFBS_cad|FBsf0000247098);(TF_binding_site|mE1_TFBS_HSA|FBsf0000358787);(TF_binding_site|mE1_TFBS_sens|FBsf0000229062)
FBgn0050418	2R_20134410_SNP	T	C	0.05056	9	169	5.57e-05	5.33e-05	0.79905	2R_20134410_SNP	C	SiteClass[FBgn0050418|nord|INTRON|0],TranscriptAnnot[INTRON(MODIFIER||||587|nord|protein_coding|CODING|FBtr0072263|2|1)]	-	FBgn0050418	The gene nord is referred to in FlyBase by the symbol Dmel\nord (CG30418, FBgn0050418). It is a protein_coding_gene from Drosophila melanogaster. It has one annotated transcript and one polypeptide. Gene sequence location is 2R:24243255..24255094. It has the cytological map location 60C3-60C4. Protein features are: Fibronectin type III; Protein of unknown function DUF2369. Its molecular function …
FBtr0072263	2R_20134410_SNP	T	C	0.05056	9	169	5.57e-05	5.33e-05	0.79905	2R_20134410_SNP	C	SiteClass[FBgn0050418|nord|INTRON|0],TranscriptAnnot[INTRON(MODIFIER||||587|nord|protein_coding|CODING|FBtr0072263|2|1)]	-
FBgn0050418	2R_20134758_SNP	A	T	0.05056	9	169	5.57e-05	5.33e-05	0.79905	2R_20134758_SNP	T	SiteClass[FBgn0050418|nord|INTRON|0],TranscriptAnnot[INTRON(MODIFIER||||587|nord|protein_coding|CODING|FBtr0072263|2|1)]	-	FBgn0050418	The gene nord is referred to in FlyBase by the symbol Dmel\nord (CG30418, FBgn0050418). It is a protein_coding_gene from Drosophila melanogaster. It has one annotated transcript and one polypeptide. Gene sequence location is 2R:24243255..24255094. It has the cytological map location 60C3-60C4. Protein features are: Fibronectin type III; Protein of unknown function DUF2369. Its molecular function …
FBtr0072263	2R_20134758_SNP	A	T	0.05056	9	169	5.57e-05	5.33e-05	0.79905	2R_20134758_SNP	T	SiteClass[FBgn0050418|nord|INTRON|0],TranscriptAnnot[INTRON(MODIFIER||||587|nord|protein_coding|CODING|FBtr0072263|2|1)]	-
FBgn0265728	3L_2009993_SNP	T	A	0.4762	80	88	5.45e-05	5.44e-05	0.79905	3L_2009993_SNP	A	SiteClass[FBgn0265728|CR44535|DOWNSTREAM|156],TranscriptAnnot[DOWNSTREAM(MODIFIER||156|||CR44535|ncRNA|NON_CODING|FBtr0340684||1);EXON(MODIFIER|||||CR44535|ncRNA|NON_CODING|FBtr0340685|1|1)]	-	FBgn0265728	This	gene	is	referred	to	in	FlyBase	by	the	symbol	Dmel\CR44535	(FBgn0265728).	It	is	a	non_protein_coding_gene	from	Drosophila	melanogaster.	It	has	2	annotated	transcripts.	Gene	sequence	location	is	3L:2008722..2010751.	It	has	the	cytological	map	location
FBtr0340684	3L_2009993_SNP	T	A	0.4762	80	88	5.45e-05	5.44e-05	0.79905	3L_2009993_SNP	A	SiteClass[FBgn0265728|CR44535|DOWNSTREAM|156],TranscriptAnnot[DOWNSTREAM(MODIFIER||156|||CR44535|ncRNA|NON_CODING|FBtr0340684||1);EXON(MODIFIER|||||CR44535|ncRNA|NON_CODING|FBtr0340685|1|1)]	-
FBtr0340685	3L_2009993_SNP	T	A	0.4762	80	88	5.45e-05	5.44e-05	0.79905	3L_2009993_SNP	A	SiteClass[FBgn0265728|CR44535|DOWNSTREAM|156],TranscriptAnnot[DOWNSTREAM(MODIFIER||156|||CR44535|ncRNA|NON_CODING|FBtr0340684||1);EXON(MODIFIER|||||CR44535|ncRNA|NON_CODING|FBtr0340685|1|1)]	-
FBgn0015903	2R_19482135_SNP	C	G	0.3713	62	105	6.85e-05	5.5e-05	0.79905	2R_19482135_SNP	G	SiteClass[FBgn0015903|apt|INTRON|0],TranscriptAnnot[INTRON(MODIFIER||||489|apt|protein_coding|CODING|FBtr0072066|1|1);INTRON(MODIFIER||||483|apt|protein_coding|CODING|FBtr0072069|1|1);INTRON(MODIFIER||||483|apt|protein_coding|CODING|FBtr0072067|2|1);INTRON(MODIFIER||||483|apt|protein_coding|CODING|FBtr0072070|1|1);INTRON(MODIFIER||||469|apt|protein_coding|CODING|FBtr0072068|2|1)]	(TF_binding_site|mE1_TFBS_sens|FBsf0000229625)	FBgn0015903	The gene apontic is referred to in FlyBase by the symbol Dmel\apt (CG5393, FBgn0015903). It is a protein_coding_gene from Drosophila melanogaster. It has 6 annotated transcripts and 6 polypeptides (4 unique). Gene sequence location is 2R:23564891..23599526. It has the cytological map location 59F1-59F4. Protein features are: Myb/SANT-like DNA-binding domain; SANT/Myb domain. Its molecular functio…
FBtr0072066	2R_19482135_SNP	C	G	0.3713	62	105	6.85e-05	5.5e-05	0.79905	2R_19482135_SNP	G	SiteClass[FBgn0015903|apt|INTRON|0],TranscriptAnnot[INTRON(MODIFIER||||489|apt|protein_coding|CODING|FBtr0072066|1|1);INTRON(MODIFIER||||483|apt|protein_coding|CODING|FBtr0072069|1|1);INTRON(MODIFIER||||483|apt|protein_coding|CODING|FBtr0072067|2|1);INTRON(MODIFIER||||483|apt|protein_coding|CODING|FBtr0072070|1|1);INTRON(MODIFIER||||469|apt|protein_coding|CODING|FBtr0072068|2|1)]	(TF_binding_site|mE1_TFBS_sens|FBsf0000229625)
FBtr0072069	2R_19482135_SNP	C	G	0.3713	62	105	6.85e-05	5.5e-05	0.79905	2R_19482135_SNP	G	SiteClass[FBgn0015903|apt|INTRON|0],TranscriptAnnot[INTRON(MODIFIER||||489|apt|protein_coding|CODING|FBtr0072066|1|1);INTRON(MODIFIER||||483|apt|protein_coding|CODING|FBtr0072069|1|1);INTRON(MODIFIER||||483|apt|protein_coding|CODING|FBtr0072067|2|1);INTRON(MODIFIER||||483|apt|protein_coding|CODING|FBtr0072070|1|1);INTRON(MODIFIER||||469|apt|protein_coding|CODING|FBtr0072068|2|1)]	(TF_binding_site|mE1_TFBS_sens|FBsf0000229625)
FBtr0072067	2R_19482135_SNP	C	G	0.3713	62	105	6.85e-05	5.5e-05	0.79905	2R_19482135_SNP	G	SiteClass[FBgn0015903|apt|INTRON|0],TranscriptAnnot[INTRON(MODIFIER||||489|apt|protein_coding|CODING|FBtr0072066|1|1);INTRON(MODIFIER||||483|apt|protein_coding|CODING|FBtr0072069|1|1);INTRON(MODIFIER||||483|apt|protein_coding|CODING|FBtr0072067|2|1);INTRON(MODIFIER||||483|apt|protein_coding|CODING|FBtr0072070|1|1);INTRON(MODIFIER||||469|apt|protein_coding|CODING|FBtr0072068|2|1)]	(TF_binding_site|mE1_TFBS_sens|FBsf0000229625)
FBtr0072070	2R_19482135_SNP	C	G	0.3713	62	105	6.85e-05	5.5e-05	0.79905	2R_19482135_SNP	G	SiteClass[FBgn0015903|apt|INTRON|0],TranscriptAnnot[INTRON(MODIFIER||||489|apt|protein_coding|CODING|FBtr0072066|1|1);INTRON(MODIFIER||||483|apt|protein_coding|CODING|FBtr0072069|1|1);INTRON(MODIFIER||||483|apt|protein_coding|CODING|FBtr0072067|2|1);INTRON(MODIFIER||||483|apt|protein_coding|CODING|FBtr0072070|1|1);INTRON(MODIFIER||||469|apt|protein_coding|CODING|FBtr0072068|2|1)]	(TF_binding_site|mE1_TFBS_sens|FBsf0000229625)
FBtr0072068	2R_19482135_SNP	C	G	0.3713	62	105	6.85e-05	5.5e-05	0.79905	2R_19482135_SNP	G	SiteClass[FBgn0015903|apt|INTRON|0],TranscriptAnnot[INTRON(MODIFIER||||489|apt|protein_coding|CODING|FBtr0072066|1|1);INTRON(MODIFIER||||483|apt|protein_coding|CODING|FBtr0072069|1|1);INTRON(MODIFIER||||483|apt|protein_coding|CODING|FBtr0072067|2|1);INTRON(MODIFIER||||483|apt|protein_coding|CODING|FBtr0072070|1|1);INTRON(MODIFIER||||469|apt|protein_coding|CODING|FBtr0072068|2|1)]	(TF_binding_site|mE1_TFBS_sens|FBsf0000229625)
FBgn0038892	3R_17395176_SNP	A	T	0.06818	12	164	8.33e-05	5.79e-05	0.79905	3R_17395176_SNP	T	SiteClass[FBgn0038892|CG15498|UPSTREAM|305;FBgn0013984|InR|DOWNSTREAM|794],TranscriptAnnot[UPSTREAM(MODIFIER||305||281|CG15498|protein_coding|CODING|FBtr0084122||1);DOWNSTREAM(MODIFIER||794||2144|InR|protein_coding|CODING|FBtr0084121||1);DOWNSTREAM(MODIFIER||794||2144|InR|protein_coding|CODING|FBtr0290230||1);DOWNSTREAM(MODIFIER||794||2144|InR|protein_coding|CODING|FBtr0290231||1);DOWNSTREAM(MODI…	-	FBgn0038892	This gene is referred to in FlyBase by the symbol Dmel\CG15498 (FBgn0038892). It is a protein_coding_gene from Drosophila melanogaster. It has one annotated transcript and one polypeptide. Gene sequence location is 3R:21567519..21569149. It has the cytological map location 93E4. Its molecular function is described by: . It is involved in the biological process described with: . 3 alleles are repo…
FBgn0013984	3R_17395176_SNP	A	T	0.06818	12	164	8.33e-05	5.79e-05	0.79905	3R_17395176_SNP	T	SiteClass[FBgn0038892|CG15498|UPSTREAM|305;FBgn0013984|InR|DOWNSTREAM|794],TranscriptAnnot[UPSTREAM(MODIFIER||305||281|CG15498|protein_coding|CODING|FBtr0084122||1);DOWNSTREAM(MODIFIER||794||2144|InR|protein_coding|CODING|FBtr0084121||1);DOWNSTREAM(MODIFIER||794||2144|InR|protein_coding|CODING|FBtr0290230||1);DOWNSTREAM(MODIFIER||794||2144|InR|protein_coding|CODING|FBtr0290231||1);DOWNSTREAM(MODI…	-
FBtr0084122	3R_17395176_SNP	A	T	0.06818	12	164	8.33e-05	5.79e-05	0.79905	3R_17395176_SNP	T	SiteClass[FBgn0038892|CG15498|UPSTREAM|305;FBgn0013984|InR|DOWNSTREAM|794],TranscriptAnnot[UPSTREAM(MODIFIER||305||281|CG15498|protein_coding|CODING|FBtr0084122||1);DOWNSTREAM(MODIFIER||794||2144|InR|protein_coding|CODING|FBtr0084121||1);DOWNSTREAM(MODIFIER||794||2144|InR|protein_coding|CODING|FBtr0290230||1);DOWNSTREAM(MODIFIER||794||2144|InR|protein_coding|CODING|FBtr0290231||1);DOWNSTREAM(MODI…	-
FBtr0084121	3R_17395176_SNP	A	T	0.06818	12	164	8.33e-05	5.79e-05	0.79905	3R_17395176_SNP	T	SiteClass[FBgn0038892|CG15498|UPSTREAM|305;FBgn0013984|InR|DOWNSTREAM|794],TranscriptAnnot[UPSTREAM(MODIFIER||305||281|CG15498|protein_coding|CODING|FBtr0084122||1);DOWNSTREAM(MODIFIER||794||2144|InR|protein_coding|CODING|FBtr0084121||1);DOWNSTREAM(MODIFIER||794||2144|InR|protein_coding|CODING|FBtr0290230||1);DOWNSTREAM(MODIFIER||794||2144|InR|protein_coding|CODING|FBtr0290231||1);DOWNSTREAM(MODI…	-
FBtr0290230	3R_17395176_SNP	A	T	0.06818	12	164	8.33e-05	5.79e-05	0.79905	3R_17395176_SNP	T	SiteClass[FBgn0038892|CG15498|UPSTREAM|305;FBgn0013984|InR|DOWNSTREAM|794],TranscriptAnnot[UPSTREAM(MODIFIER||305||281|CG15498|protein_coding|CODING|FBtr0084122||1);DOWNSTREAM(MODIFIER||794||2144|InR|protein_coding|CODING|FBtr0084121||1);DOWNSTREAM(MODIFIER||794||2144|InR|protein_coding|CODING|FBtr0290230||1);DOWNSTREAM(MODIFIER||794||2144|InR|protein_coding|CODING|FBtr0290231||1);DOWNSTREAM(MODI…	-
FBtr0290231	3R_17395176_SNP	A	T	0.06818	12	164	8.33e-05	5.79e-05	0.79905	3R_17395176_SNP	T	SiteClass[FBgn0038892|CG15498|UPSTREAM|305;FBgn0013984|InR|DOWNSTREAM|794],TranscriptAnnot[UPSTREAM(MODIFIER||305||281|CG15498|protein_coding|CODING|FBtr0084122||1);DOWNSTREAM(MODIFIER||794||2144|InR|protein_coding|CODING|FBtr0084121||1);DOWNSTREAM(MODIFIER||794||2144|InR|protein_coding|CODING|FBtr0290230||1);DOWNSTREAM(MODIFIER||794||2144|InR|protein_coding|CODING|FBtr0290231||1);DOWNSTREAM(MODI…	-
FBtr0290232	3R_17395176_SNP	A	T	0.06818	12	164	8.33e-05	5.79e-05	0.79905	3R_17395176_SNP	T	SiteClass[FBgn0038892|CG15498|UPSTREAM|305;FBgn0013984|InR|DOWNSTREAM|794],TranscriptAnnot[UPSTREAM(MODIFIER||305||281|CG15498|protein_coding|CODING|FBtr0084122||1);DOWNSTREAM(MODIFIER||794||2144|InR|protein_coding|CODING|FBtr0084121||1);DOWNSTREAM(MODIFIER||794||2144|InR|protein_coding|CODING|FBtr0290230||1);DOWNSTREAM(MODIFIER||794||2144|InR|protein_coding|CODING|FBtr0290231||1);DOWNSTREAM(MODI…	-
FBgn0036038	3L_9718027_SNP	A	G	0.5	85	85	7.03e-05	5.83e-05	0.79905	3L_9718027_SNP	G	SiteClass[FBgn0036038|defl|SYNONYMOUS_CODING|0],TranscriptAnnot[SYNONYMOUS_CODING(LOW|SILENT|caG/caA|Q462|1001|defl|protein_coding|CODING|FBtr0076403|1|1)]	(TF_binding_site|mE1_TFBS_cad|FBsf0000244622)	FBgn0036038	The gene deflated is referred to in FlyBase by the symbol Dmel\defl (CG18176, FBgn0036038). It is a protein_coding_gene from Drosophila melanogaster. It has one annotated transcript and one polypeptide. Gene sequence location is 3L:9723423..9726706. It has the cytological map location 67C5. Protein features are: Armadillo-type fold. Its molecular function is described by: . It is involved in the …
FBtr0076403	3L_9718027_SNP	A	G	0.5	85	85	7.03e-05	5.83e-05	0.79905	3L_9718027_SNP	G	SiteClass[FBgn0036038|defl|SYNONYMOUS_CODING|0],TranscriptAnnot[SYNONYMOUS_CODING(LOW|SILENT|caG/caA|Q462|1001|defl|protein_coding|CODING|FBtr0076403|1|1)]	(TF_binding_site|mE1_TFBS_cad|FBsf0000244622)
FBgn0067102	2R_17963187_SNP	G	C	0.07534	11	135	3.86e-05	6.01e-05	0.79905	2R_17963187_SNP	G	SiteClass[FBgn0067102|GlcT-1|UPSTREAM|306;FBgn0034689|CG2921|UPSTREAM|374],TranscriptAnnot[UPSTREAM(MODIFIER||306||440|GlcT-1|protein_coding|CODING|FBtr0071755||1);UPSTREAM(MODIFIER||374||478|CG2921|protein_coding|CODING|FBtr0071800||1);INTERGENIC(MODIFIER||||||||||1)]	(TF_binding_site|BDTNP1_TFBS_da|FBsf0000325089);(TF_binding_site|BDTNP1_TFBS_dl|FBsf0000303824);(TF_binding_site|BDTNP1_TFBS_Med|FBsf0000281220)	FBgn0067102	The gene Ceramide glucosyltransferase is referred to in FlyBase by the symbol Dmel\GlcT-1 (CG6437, FBgn0067102). It is a protein_coding_gene from Drosophila melanogaster. It has one annotated transcript and one polypeptide. Gene sequence location is 2R:22075988..22079381. It has the cytological map location 58B3. Protein features are: Ceramide glucosyltransferase; Nucleotide-diphospho-sugar trans…
FBgn0034689	2R_17963187_SNP	G	C	0.07534	11	135	3.86e-05	6.01e-05	0.79905	2R_17963187_SNP	G	SiteClass[FBgn0067102|GlcT-1|UPSTREAM|306;FBgn0034689|CG2921|UPSTREAM|374],TranscriptAnnot[UPSTREAM(MODIFIER||306||440|GlcT-1|protein_coding|CODING|FBtr0071755||1);UPSTREAM(MODIFIER||374||478|CG2921|protein_coding|CODING|FBtr0071800||1);INTERGENIC(MODIFIER||||||||||1)]	(TF_binding_site|BDTNP1_TFBS_da|FBsf0000325089);(TF_binding_site|BDTNP1_TFBS_dl|FBsf0000303824);(TF_binding_site|BDTNP1_TFBS_Med|FBsf0000281220)	FBgn0034689	This	gene	is	referred	to	in	FlyBase	by	the	symbol	Dmel\CG2921	(FBgn0034689).	It	is	a	protein_coding_gene	from	Drosophila	melanogaster.	It	has	one	annotated	transcript	and	one	polypeptide.	Gene	sequence	location	is	2R:22073538..22075308.	It	has	the
FBtr0071755	2R_17963187_SNP	G	C	0.07534	11	135	3.86e-05	6.01e-05	0.79905	2R_17963187_SNP	G	SiteClass[FBgn0067102|GlcT-1|UPSTREAM|306;FBgn0034689|CG2921|UPSTREAM|374],TranscriptAnnot[UPSTREAM(MODIFIER||306||440|GlcT-1|protein_coding|CODING|FBtr0071755||1);UPSTREAM(MODIFIER||374||478|CG2921|protein_coding|CODING|FBtr0071800||1);INTERGENIC(MODIFIER||||||||||1)]	(TF_binding_site|BDTNP1_TFBS_da|FBsf0000325089);(TF_binding_site|BDTNP1_TFBS_dl|FBsf0000303824);(TF_binding_site|BDTNP1_TFBS_Med|FBsf0000281220)
FBtr0071800	2R_17963187_SNP	G	C	0.07534	11	135	3.86e-05	6.01e-05	0.79905	2R_17963187_SNP	G	SiteClass[FBgn0067102|GlcT-1|UPSTREAM|306;FBgn0034689|CG2921|UPSTREAM|374],TranscriptAnnot[UPSTREAM(MODIFIER||306||440|GlcT-1|protein_coding|CODING|FBtr0071755||1);UPSTREAM(MODIFIER||374||478|CG2921|protein_coding|CODING|FBtr0071800||1);INTERGENIC(MODIFIER||||||||||1)]	(TF_binding_site|BDTNP1_TFBS_da|FBsf0000325089);(TF_binding_site|BDTNP1_TFBS_dl|FBsf0000303824);(TF_binding_site|BDTNP1_TFBS_Med|FBsf0000281220)
FBgn0016983	3L_7375840_SNP	T	C	0.2965	51	121	5.94e-05	6.03e-05	0.79905	3L_7375840_SNP	T	SiteClass[FBgn0016983|smid|INTRON|0],TranscriptAnnot[INTRON(MODIFIER||||944|smid|protein_coding|CODING|FBtr0076851|3|1);INTRON(MODIFIER||||910|smid|protein_coding|CODING|FBtr0331849|3|1);INTRON(MODIFIER||||910|smid|protein_coding|CODING|FBtr0333404|3|1);INTRON(MODIFIER||||943|smid|protein_coding|CODING|FBtr0301611|3|1);INTRON(MODIFIER||||927|smid|protein_coding|CODING|FBtr0331850|3|1)]	(TF_binding_site|BDTNP1_TFBS_dl|FBsf0000306072)	FBgn0016983	The gene smallminded is referred to in FlyBase by the symbol Dmel\smid (CG8571, FBgn0016983). It is a protein_coding_gene from Drosophila melanogaster. It has 5 annotated transcripts and 5 polypeptides (4 unique). Gene sequence location is 3L:7381614..7385637. It has the cytological map location 65F9-65F10. Protein features are: AAA+ ATPase domain; ATPase, AAA-type, conserved site; ATPase, AAA-ty…
FBtr0076851	3L_7375840_SNP	T	C	0.2965	51	121	5.94e-05	6.03e-05	0.79905	3L_7375840_SNP	T	SiteClass[FBgn0016983|smid|INTRON|0],TranscriptAnnot[INTRON(MODIFIER||||944|smid|protein_coding|CODING|FBtr0076851|3|1);INTRON(MODIFIER||||910|smid|protein_coding|CODING|FBtr0331849|3|1);INTRON(MODIFIER||||910|smid|protein_coding|CODING|FBtr0333404|3|1);INTRON(MODIFIER||||943|smid|protein_coding|CODING|FBtr0301611|3|1);INTRON(MODIFIER||||927|smid|protein_coding|CODING|FBtr0331850|3|1)]	(TF_binding_site|BDTNP1_TFBS_dl|FBsf0000306072)
FBtr0331849	3L_7375840_SNP	T	C	0.2965	51	121	5.94e-05	6.03e-05	0.79905	3L_7375840_SNP	T	SiteClass[FBgn0016983|smid|INTRON|0],TranscriptAnnot[INTRON(MODIFIER||||944|smid|protein_coding|CODING|FBtr0076851|3|1);INTRON(MODIFIER||||910|smid|protein_coding|CODING|FBtr0331849|3|1);INTRON(MODIFIER||||910|smid|protein_coding|CODING|FBtr0333404|3|1);INTRON(MODIFIER||||943|smid|protein_coding|CODING|FBtr0301611|3|1);INTRON(MODIFIER||||927|smid|protein_coding|CODING|FBtr0331850|3|1)]	(TF_binding_site|BDTNP1_TFBS_dl|FBsf0000306072)
FBtr0333404	3L_7375840_SNP	T	C	0.2965	51	121	5.94e-05	6.03e-05	0.79905	3L_7375840_SNP	T	SiteClass[FBgn0016983|smid|INTRON|0],TranscriptAnnot[INTRON(MODIFIER||||944|smid|protein_coding|CODING|FBtr0076851|3|1);INTRON(MODIFIER||||910|smid|protein_coding|CODING|FBtr0331849|3|1);INTRON(MODIFIER||||910|smid|protein_coding|CODING|FBtr0333404|3|1);INTRON(MODIFIER||||943|smid|protein_coding|CODING|FBtr0301611|3|1);INTRON(MODIFIER||||927|smid|protein_coding|CODING|FBtr0331850|3|1)]	(TF_binding_site|BDTNP1_TFBS_dl|FBsf0000306072)
FBtr0301611	3L_7375840_SNP	T	C	0.2965	51	121	5.94e-05	6.03e-05	0.79905	3L_7375840_SNP	T	SiteClass[FBgn0016983|smid|INTRON|0],TranscriptAnnot[INTRON(MODIFIER||||944|smid|protein_coding|CODING|FBtr0076851|3|1);INTRON(MODIFIER||||910|smid|protein_coding|CODING|FBtr0331849|3|1);INTRON(MODIFIER||||910|smid|protein_coding|CODING|FBtr0333404|3|1);INTRON(MODIFIER||||943|smid|protein_coding|CODING|FBtr0301611|3|1);INTRON(MODIFIER||||927|smid|protein_coding|CODING|FBtr0331850|3|1)]	(TF_binding_site|BDTNP1_TFBS_dl|FBsf0000306072)
FBtr0331850	3L_7375840_SNP	T	C	0.2965	51	121	5.94e-05	6.03e-05	0.79905	3L_7375840_SNP	T	SiteClass[FBgn0016983|smid|INTRON|0],TranscriptAnnot[INTRON(MODIFIER||||944|smid|protein_coding|CODING|FBtr0076851|3|1);INTRON(MODIFIER||||910|smid|protein_coding|CODING|FBtr0331849|3|1);INTRON(MODIFIER||||910|smid|protein_coding|CODING|FBtr0333404|3|1);INTRON(MODIFIER||||943|smid|protein_coding|CODING|FBtr0301611|3|1);INTRON(MODIFIER||||927|smid|protein_coding|CODING|FBtr0331850|3|1)]	(TF_binding_site|BDTNP1_TFBS_dl|FBsf0000306072)
FBgn0035199	3L_1263619_SNP	C	G	0.113	20	157	6.35e-05	6.06e-05	0.79905	3L_1263619_SNP	G	SiteClass[FBgn0035199|CG9134|INTRON|0],TranscriptAnnot[INTRON(MODIFIER||||376|CG9134|protein_coding|CODING|FBtr0072659|2|1)]	-	FBgn0035199	This gene is referred to in FlyBase by the symbol Dmel\CG9134 (FBgn0035199). It is a protein_coding_gene from Drosophila melanogaster. It has 3 annotated transcripts and 3 polypeptides (2 unique). Gene sequence location is 3L:1256449..1274498. It has the cytological map location 61F4. Protein features are: C-type lectin; C-type lectin fold; C-type lectin, conserved site; C-type lectin-like. Its m…
FBtr0072659	3L_1263619_SNP	C	G	0.113	20	157	6.35e-05	6.06e-05	0.79905	3L_1263619_SNP	G	SiteClass[FBgn0035199|CG9134|INTRON|0],TranscriptAnnot[INTRON(MODIFIER||||376|CG9134|protein_coding|CODING|FBtr0072659|2|1)]	-
FBgn0004842	3R_22870555_SNP	A	T	0.2988	49	115	8e-05	6.13e-05	0.79905	3R_22870555_SNP	A	SiteClass[FBgn0004842|RYa-R|INTRON|0],TranscriptAnnot[INTRON(MODIFIER||||464|RYa-R|protein_coding|CODING|FBtr0085100|4|1);INTRON(MODIFIER||||518|RYa-R|protein_coding|CODING|FBtr0345267|4|1);INTRON(MODIFIER||||467|RYa-R|protein_coding|CODING|FBtr0345268|4|1)]	-	FBgn0004842	The gene RYamide receptor is referred to in FlyBase by the symbol Dmel\RYa-R (CG5811, FBgn0004842). It is a protein_coding_gene from Drosophila melanogaster. It has 3 annotated transcripts and 3 polypeptides (all unique). Gene sequence location is 3R:26996980..27057935. It has the cytological map location 97D12-97E1. Protein features are: G protein-coupled receptor, rhodopsin-like; GPCR, rhodopsi…
FBtr0085100	3R_22870555_SNP	A	T	0.2988	49	115	8e-05	6.13e-05	0.79905	3R_22870555_SNP	A	SiteClass[FBgn0004842|RYa-R|INTRON|0],TranscriptAnnot[INTRON(MODIFIER||||464|RYa-R|protein_coding|CODING|FBtr0085100|4|1);INTRON(MODIFIER||||518|RYa-R|protein_coding|CODING|FBtr0345267|4|1);INTRON(MODIFIER||||467|RYa-R|protein_coding|CODING|FBtr0345268|4|1)]	-
FBtr0345267	3R_22870555_SNP	A	T	0.2988	49	115	8e-05	6.13e-05	0.79905	3R_22870555_SNP	A	SiteClass[FBgn0004842|RYa-R|INTRON|0],TranscriptAnnot[INTRON(MODIFIER||||464|RYa-R|protein_coding|CODING|FBtr0085100|4|1);INTRON(MODIFIER||||518|RYa-R|protein_coding|CODING|FBtr0345267|4|1);INTRON(MODIFIER||||467|RYa-R|protein_coding|CODING|FBtr0345268|4|1)]	-
FBtr0345268	3R_22870555_SNP	A	T	0.2988	49	115	8e-05	6.13e-05	0.79905	3R_22870555_SNP	A	SiteClass[FBgn0004842|RYa-R|INTRON|0],TranscriptAnnot[INTRON(MODIFIER||||464|RYa-R|protein_coding|CODING|FBtr0085100|4|1);INTRON(MODIFIER||||518|RYa-R|protein_coding|CODING|FBtr0345267|4|1);INTRON(MODIFIER||||467|RYa-R|protein_coding|CODING|FBtr0345268|4|1)]	-
FBgn0051163	3R_18093889_SNP	T	C	0.05172	9	165	8.2e-05	6.15e-05	0.79905	3R_18093889_SNP	C	SiteClass[FBgn0051163|SKIP|INTRON|0],TranscriptAnnot[INTRON(MODIFIER||||1064|SKIP|protein_coding|CODING|FBtr0301028|4|1);INTRON(MODIFIER||||1064|SKIP|protein_coding|CODING|FBtr0305036|4|1);INTRON(MODIFIER||||1034|SKIP|protein_coding|CODING|FBtr0305037|4|1);INTRON(MODIFIER||||1027|SKIP|protein_coding|CODING|FBtr0336712|5|1);INTRON(MODIFIER||||952|SKIP|protein_coding|CODING|FBtr0084197|4|1);INTRON(…	-	FBgn0051163	The gene Shal K<sup>+</sup> channel interacting protein is referred to in FlyBase by the symbol Dmel\SKIP (CG31163, FBgn0051163). It is a protein_coding_gene from Drosophila melanogaster. It has 7 annotated transcripts and 7 polypeptides (6 unique). Gene sequence location is 3R:22133830..22296126. It has the cytological map location 94A2-94A4. Protein features are: SH3 domain; Sterile alpha motif…
FBtr0301028	3R_18093889_SNP	T	C	0.05172	9	165	8.2e-05	6.15e-05	0.79905	3R_18093889_SNP	C	SiteClass[FBgn0051163|SKIP|INTRON|0],TranscriptAnnot[INTRON(MODIFIER||||1064|SKIP|protein_coding|CODING|FBtr0301028|4|1);INTRON(MODIFIER||||1064|SKIP|protein_coding|CODING|FBtr0305036|4|1);INTRON(MODIFIER||||1034|SKIP|protein_coding|CODING|FBtr0305037|4|1);INTRON(MODIFIER||||1027|SKIP|protein_coding|CODING|FBtr0336712|5|1);INTRON(MODIFIER||||952|SKIP|protein_coding|CODING|FBtr0084197|4|1);INTRON(…	-
FBtr0305036	3R_18093889_SNP	T	C	0.05172	9	165	8.2e-05	6.15e-05	0.79905	3R_18093889_SNP	C	SiteClass[FBgn0051163|SKIP|INTRON|0],TranscriptAnnot[INTRON(MODIFIER||||1064|SKIP|protein_coding|CODING|FBtr0301028|4|1);INTRON(MODIFIER||||1064|SKIP|protein_coding|CODING|FBtr0305036|4|1);INTRON(MODIFIER||||1034|SKIP|protein_coding|CODING|FBtr0305037|4|1);INTRON(MODIFIER||||1027|SKIP|protein_coding|CODING|FBtr0336712|5|1);INTRON(MODIFIER||||952|SKIP|protein_coding|CODING|FBtr0084197|4|1);INTRON(…	-
FBtr0305037	3R_18093889_SNP	T	C	0.05172	9	165	8.2e-05	6.15e-05	0.79905	3R_18093889_SNP	C	SiteClass[FBgn0051163|SKIP|INTRON|0],TranscriptAnnot[INTRON(MODIFIER||||1064|SKIP|protein_coding|CODING|FBtr0301028|4|1);INTRON(MODIFIER||||1064|SKIP|protein_coding|CODING|FBtr0305036|4|1);INTRON(MODIFIER||||1034|SKIP|protein_coding|CODING|FBtr0305037|4|1);INTRON(MODIFIER||||1027|SKIP|protein_coding|CODING|FBtr0336712|5|1);INTRON(MODIFIER||||952|SKIP|protein_coding|CODING|FBtr0084197|4|1);INTRON(…	-
FBtr0336712	3R_18093889_SNP	T	C	0.05172	9	165	8.2e-05	6.15e-05	0.79905	3R_18093889_SNP	C	SiteClass[FBgn0051163|SKIP|INTRON|0],TranscriptAnnot[INTRON(MODIFIER||||1064|SKIP|protein_coding|CODING|FBtr0301028|4|1);INTRON(MODIFIER||||1064|SKIP|protein_coding|CODING|FBtr0305036|4|1);INTRON(MODIFIER||||1034|SKIP|protein_coding|CODING|FBtr0305037|4|1);INTRON(MODIFIER||||1027|SKIP|protein_coding|CODING|FBtr0336712|5|1);INTRON(MODIFIER||||952|SKIP|protein_coding|CODING|FBtr0084197|4|1);INTRON(…	-
FBtr0084197	3R_18093889_SNP	T	C	0.05172	9	165	8.2e-05	6.15e-05	0.79905	3R_18093889_SNP	C	SiteClass[FBgn0051163|SKIP|INTRON|0],TranscriptAnnot[INTRON(MODIFIER||||1064|SKIP|protein_coding|CODING|FBtr0301028|4|1);INTRON(MODIFIER||||1064|SKIP|protein_coding|CODING|FBtr0305036|4|1);INTRON(MODIFIER||||1034|SKIP|protein_coding|CODING|FBtr0305037|4|1);INTRON(MODIFIER||||1027|SKIP|protein_coding|CODING|FBtr0336712|5|1);INTRON(MODIFIER||||952|SKIP|protein_coding|CODING|FBtr0084197|4|1);INTRON(…	-
FBtr0330381	3R_18093889_SNP	T	C	0.05172	9	165	8.2e-05	6.15e-05	0.79905	3R_18093889_SNP	C	SiteClass[FBgn0051163|SKIP|INTRON|0],TranscriptAnnot[INTRON(MODIFIER||||1064|SKIP|protein_coding|CODING|FBtr0301028|4|1);INTRON(MODIFIER||||1064|SKIP|protein_coding|CODING|FBtr0305036|4|1);INTRON(MODIFIER||||1034|SKIP|protein_coding|CODING|FBtr0305037|4|1);INTRON(MODIFIER||||1027|SKIP|protein_coding|CODING|FBtr0336712|5|1);INTRON(MODIFIER||||952|SKIP|protein_coding|CODING|FBtr0084197|4|1);INTRON(…	-
FBgn0085371	3L_5496017_SNP	G	C	0.05422	9	157	6.99e-05	6.25e-05	0.79905	3L_5496017_SNP	C	SiteClass[FBgn0085371|CG34342|DOWNSTREAM|611],TranscriptAnnot[DOWNSTREAM(MODIFIER||611||572|CG34342|protein_coding|CODING|FBtr0344834||1);DOWNSTREAM(MODIFIER||611||322|CG34342|protein_coding|CODING|FBtr0344835||1);INTERGENIC(MODIFIER||||||||||1)]	-	FBgn0085371	This gene is referred to in FlyBase by the symbol Dmel\CG34342 (FBgn0085371). It is a protein_coding_gene from Drosophila melanogaster. It has 2 annotated transcripts and 2 polypeptides (all unique). Gene sequence location is 3L:5503528..5510860. It has the cytological map location 64D2. Protein features are: Fatty acyl-CoA reductase; Male sterility, NAD-binding; NAD(P)-binding domain. Its molecu…
FBtr0344834	3L_5496017_SNP	G	C	0.05422	9	157	6.99e-05	6.25e-05	0.79905	3L_5496017_SNP	C	SiteClass[FBgn0085371|CG34342|DOWNSTREAM|611],TranscriptAnnot[DOWNSTREAM(MODIFIER||611||572|CG34342|protein_coding|CODING|FBtr0344834||1);DOWNSTREAM(MODIFIER||611||322|CG34342|protein_coding|CODING|FBtr0344835||1);INTERGENIC(MODIFIER||||||||||1)]	-
FBtr0344835	3L_5496017_SNP	G	C	0.05422	9	157	6.99e-05	6.25e-05	0.79905	3L_5496017_SNP	C	SiteClass[FBgn0085371|CG34342|DOWNSTREAM|611],TranscriptAnnot[DOWNSTREAM(MODIFIER||611||572|CG34342|protein_coding|CODING|FBtr0344834||1);DOWNSTREAM(MODIFIER||611||322|CG34342|protein_coding|CODING|FBtr0344835||1);INTERGENIC(MODIFIER||||||||||1)]	-
FBgn0035199	3L_1263533_SNP	A	C	0.12	21	154	4.83e-05	6.26e-05	0.79905	3L_1263533_SNP	C	SiteClass[FBgn0035199|CG9134|INTRON|0],TranscriptAnnot[INTRON(MODIFIER||||376|CG9134|protein_coding|CODING|FBtr0072659|2|1)]	-	FBgn0035199	This gene is referred to in FlyBase by the symbol Dmel\CG9134 (FBgn0035199). It is a protein_coding_gene from Drosophila melanogaster. It has 3 annotated transcripts and 3 polypeptides (2 unique). Gene sequence location is 3L:1256449..1274498. It has the cytological map location 61F4. Protein features are: C-type lectin; C-type lectin fold; C-type lectin, conserved site; C-type lectin-like. Its m…
FBtr0072659	3L_1263533_SNP	A	C	0.12	21	154	4.83e-05	6.26e-05	0.79905	3L_1263533_SNP	C	SiteClass[FBgn0035199|CG9134|INTRON|0],TranscriptAnnot[INTRON(MODIFIER||||376|CG9134|protein_coding|CODING|FBtr0072659|2|1)]	-
FBgn0266024	2L_2601010_SNP	T	C	0.06215	11	166	7.51e-05	6.3e-05	0.79905	2L_2601010_SNP	C	SiteClass[FBgn0266024|CR44789|DOWNSTREAM|23],TranscriptAnnot[DOWNSTREAM(MODIFIER||23|||CR44789|ncRNA|NON_CODING|FBtr0343234||1);INTERGENIC(MODIFIER||||||||||1)]	-	FBgn0266024	This	gene	is	referred	to	in	FlyBase	by	the	symbol	Dmel\CR44789	(FBgn0266024).	It	is	a	non_protein_coding_gene	from	Drosophila	melanogaster.	It	has	one	annotated	transcript.	Gene	sequence	location	is	2L:2601033..2601721.	It	has	the	cytological	map	location
FBtr0343234	2L_2601010_SNP	T	C	0.06215	11	166	7.51e-05	6.3e-05	0.79905	2L_2601010_SNP	C	SiteClass[FBgn0266024|CR44789|DOWNSTREAM|23],TranscriptAnnot[DOWNSTREAM(MODIFIER||23|||CR44789|ncRNA|NON_CODING|FBtr0343234||1);INTERGENIC(MODIFIER||||||||||1)]	-
FBgn0262871	3R_13212239_SNP	G	T	0.08235	14	156	7.94e-05	6.31e-05	0.79905	3R_13212239_SNP	G	SiteClass[FBgn0262871|lute|INTRON|0;FBgn0038499|Brf|INTRON|0],TranscriptAnnot[INTRON(MODIFIER||||662|Brf|protein_coding|CODING|FBtr0083452|3|1);INTRON(MODIFIER||||662|Brf|protein_coding|CODING|FBtr0302317|3|1);INTRON(MODIFIER||||727|lute|protein_coding|CODING|FBtr0306209|2|1);INTRON(MODIFIER||||727|lute|protein_coding|CODING|FBtr0306210|2|1);INTRON(MODIFIER||||677|lute|protein_coding|CODING|FBtr0…	(TF_binding_site|BDTNP1_TFBS_da|FBsf0000329648);(TF_binding_site|BDTNP1_TFBS_dl|FBsf0000312407);(TF_binding_site|BDTNP1_TFBS_Med|FBsf0000285729);(TF_binding_site|mE1_TFBS_cad|FBsf0000248626);(TF_binding_site|mE1_TFBS_disco|FBsf0000260861);(TF_binding_site|mE1_TFBS_HSA|FBsf0000372576)	FBgn0262871	The gene lute is referred to in FlyBase by the symbol Dmel\lute (CG43226, FBgn0262871). It is a protein_coding_gene from Drosophila melanogaster. It has 4 annotated transcripts and 4 polypeptides (3 unique). Gene sequence location is 3R:17379944..17390265. It has the cytological map location 90A3. Protein features are: BTB/Kelch-associated; BTB/POZ domain; PHR; SKP1/BTB/POZ domain. Its molecular …
FBgn0038499	3R_13212239_SNP	G	T	0.08235	14	156	7.94e-05	6.31e-05	0.79905	3R_13212239_SNP	G	SiteClass[FBgn0262871|lute|INTRON|0;FBgn0038499|Brf|INTRON|0],TranscriptAnnot[INTRON(MODIFIER||||662|Brf|protein_coding|CODING|FBtr0083452|3|1);INTRON(MODIFIER||||662|Brf|protein_coding|CODING|FBtr0302317|3|1);INTRON(MODIFIER||||727|lute|protein_coding|CODING|FBtr0306209|2|1);INTRON(MODIFIER||||727|lute|protein_coding|CODING|FBtr0306210|2|1);INTRON(MODIFIER||||677|lute|protein_coding|CODING|FBtr0…	(TF_binding_site|BDTNP1_TFBS_da|FBsf0000329648);(TF_binding_site|BDTNP1_TFBS_dl|FBsf0000312407);(TF_binding_site|BDTNP1_TFBS_Med|FBsf0000285729);(TF_binding_site|mE1_TFBS_cad|FBsf0000248626);(TF_binding_site|mE1_TFBS_disco|FBsf0000260861);(TF_binding_site|mE1_TFBS_HSA|FBsf0000372576)	FBgn0038499	The gene Brf is referred to in FlyBase by the symbol Dmel\Brf (CG31256, FBgn0038499). It is a protein_coding_gene from Drosophila melanogaster. It has 2 annotated transcripts and 2 polypeptides (1 unique). Gene sequence location is 3R:17374833..17391337. It has the cytological map location 90A3-90A5. Protein features are: Brf1, TBP-binding domain; Cyclin-like; Transcription factor IIIB subunit Br…
FBtr0083452	3R_13212239_SNP	G	T	0.08235	14	156	7.94e-05	6.31e-05	0.79905	3R_13212239_SNP	G	SiteClass[FBgn0262871|lute|INTRON|0;FBgn0038499|Brf|INTRON|0],TranscriptAnnot[INTRON(MODIFIER||||662|Brf|protein_coding|CODING|FBtr0083452|3|1);INTRON(MODIFIER||||662|Brf|protein_coding|CODING|FBtr0302317|3|1);INTRON(MODIFIER||||727|lute|protein_coding|CODING|FBtr0306209|2|1);INTRON(MODIFIER||||727|lute|protein_coding|CODING|FBtr0306210|2|1);INTRON(MODIFIER||||677|lute|protein_coding|CODING|FBtr0…	(TF_binding_site|BDTNP1_TFBS_da|FBsf0000329648);(TF_binding_site|BDTNP1_TFBS_dl|FBsf0000312407);(TF_binding_site|BDTNP1_TFBS_Med|FBsf0000285729);(TF_binding_site|mE1_TFBS_cad|FBsf0000248626);(TF_binding_site|mE1_TFBS_disco|FBsf0000260861);(TF_binding_site|mE1_TFBS_HSA|FBsf0000372576)
FBtr0302317	3R_13212239_SNP	G	T	0.08235	14	156	7.94e-05	6.31e-05	0.79905	3R_13212239_SNP	G	SiteClass[FBgn0262871|lute|INTRON|0;FBgn0038499|Brf|INTRON|0],TranscriptAnnot[INTRON(MODIFIER||||662|Brf|protein_coding|CODING|FBtr0083452|3|1);INTRON(MODIFIER||||662|Brf|protein_coding|CODING|FBtr0302317|3|1);INTRON(MODIFIER||||727|lute|protein_coding|CODING|FBtr0306209|2|1);INTRON(MODIFIER||||727|lute|protein_coding|CODING|FBtr0306210|2|1);INTRON(MODIFIER||||677|lute|protein_coding|CODING|FBtr0…	(TF_binding_site|BDTNP1_TFBS_da|FBsf0000329648);(TF_binding_site|BDTNP1_TFBS_dl|FBsf0000312407);(TF_binding_site|BDTNP1_TFBS_Med|FBsf0000285729);(TF_binding_site|mE1_TFBS_cad|FBsf0000248626);(TF_binding_site|mE1_TFBS_disco|FBsf0000260861);(TF_binding_site|mE1_TFBS_HSA|FBsf0000372576)
FBtr0306209	3R_13212239_SNP	G	T	0.08235	14	156	7.94e-05	6.31e-05	0.79905	3R_13212239_SNP	G	SiteClass[FBgn0262871|lute|INTRON|0;FBgn0038499|Brf|INTRON|0],TranscriptAnnot[INTRON(MODIFIER||||662|Brf|protein_coding|CODING|FBtr0083452|3|1);INTRON(MODIFIER||||662|Brf|protein_coding|CODING|FBtr0302317|3|1);INTRON(MODIFIER||||727|lute|protein_coding|CODING|FBtr0306209|2|1);INTRON(MODIFIER||||727|lute|protein_coding|CODING|FBtr0306210|2|1);INTRON(MODIFIER||||677|lute|protein_coding|CODING|FBtr0…	(TF_binding_site|BDTNP1_TFBS_da|FBsf0000329648);(TF_binding_site|BDTNP1_TFBS_dl|FBsf0000312407);(TF_binding_site|BDTNP1_TFBS_Med|FBsf0000285729);(TF_binding_site|mE1_TFBS_cad|FBsf0000248626);(TF_binding_site|mE1_TFBS_disco|FBsf0000260861);(TF_binding_site|mE1_TFBS_HSA|FBsf0000372576)
FBtr0306210	3R_13212239_SNP	G	T	0.08235	14	156	7.94e-05	6.31e-05	0.79905	3R_13212239_SNP	G	SiteClass[FBgn0262871|lute|INTRON|0;FBgn0038499|Brf|INTRON|0],TranscriptAnnot[INTRON(MODIFIER||||662|Brf|protein_coding|CODING|FBtr0083452|3|1);INTRON(MODIFIER||||662|Brf|protein_coding|CODING|FBtr0302317|3|1);INTRON(MODIFIER||||727|lute|protein_coding|CODING|FBtr0306209|2|1);INTRON(MODIFIER||||727|lute|protein_coding|CODING|FBtr0306210|2|1);INTRON(MODIFIER||||677|lute|protein_coding|CODING|FBtr0…	(TF_binding_site|BDTNP1_TFBS_da|FBsf0000329648);(TF_binding_site|BDTNP1_TFBS_dl|FBsf0000312407);(TF_binding_site|BDTNP1_TFBS_Med|FBsf0000285729);(TF_binding_site|mE1_TFBS_cad|FBsf0000248626);(TF_binding_site|mE1_TFBS_disco|FBsf0000260861);(TF_binding_site|mE1_TFBS_HSA|FBsf0000372576)
FBtr0083435	3R_13212239_SNP	G	T	0.08235	14	156	7.94e-05	6.31e-05	0.79905	3R_13212239_SNP	G	SiteClass[FBgn0262871|lute|INTRON|0;FBgn0038499|Brf|INTRON|0],TranscriptAnnot[INTRON(MODIFIER||||662|Brf|protein_coding|CODING|FBtr0083452|3|1);INTRON(MODIFIER||||662|Brf|protein_coding|CODING|FBtr0302317|3|1);INTRON(MODIFIER||||727|lute|protein_coding|CODING|FBtr0306209|2|1);INTRON(MODIFIER||||727|lute|protein_coding|CODING|FBtr0306210|2|1);INTRON(MODIFIER||||677|lute|protein_coding|CODING|FBtr0…	(TF_binding_site|BDTNP1_TFBS_da|FBsf0000329648);(TF_binding_site|BDTNP1_TFBS_dl|FBsf0000312407);(TF_binding_site|BDTNP1_TFBS_Med|FBsf0000285729);(TF_binding_site|mE1_TFBS_cad|FBsf0000248626);(TF_binding_site|mE1_TFBS_disco|FBsf0000260861);(TF_binding_site|mE1_TFBS_HSA|FBsf0000372576)
FBtr0330037	3R_13212239_SNP	G	T	0.08235	14	156	7.94e-05	6.31e-05	0.79905	3R_13212239_SNP	G	SiteClass[FBgn0262871|lute|INTRON|0;FBgn0038499|Brf|INTRON|0],TranscriptAnnot[INTRON(MODIFIER||||662|Brf|protein_coding|CODING|FBtr0083452|3|1);INTRON(MODIFIER||||662|Brf|protein_coding|CODING|FBtr0302317|3|1);INTRON(MODIFIER||||727|lute|protein_coding|CODING|FBtr0306209|2|1);INTRON(MODIFIER||||727|lute|protein_coding|CODING|FBtr0306210|2|1);INTRON(MODIFIER||||677|lute|protein_coding|CODING|FBtr0…	(TF_binding_site|BDTNP1_TFBS_da|FBsf0000329648);(TF_binding_site|BDTNP1_TFBS_dl|FBsf0000312407);(TF_binding_site|BDTNP1_TFBS_Med|FBsf0000285729);(TF_binding_site|mE1_TFBS_cad|FBsf0000248626);(TF_binding_site|mE1_TFBS_disco|FBsf0000260861);(TF_binding_site|mE1_TFBS_HSA|FBsf0000372576)
FBgn0266024	2L_2601315_SNP	G	A	0.0618	11	167	7.31e-05	6.42e-05	0.79905	2L_2601315_SNP	A	SiteClass[FBgn0266024|CR44789|EXON|0],TranscriptAnnot[EXON(MODIFIER|||||CR44789|ncRNA|NON_CODING|FBtr0343234|1|1)]	-	FBgn0266024	This	gene	is	referred	to	in	FlyBase	by	the	symbol	Dmel\CR44789	(FBgn0266024).	It	is	a	non_protein_coding_gene	from	Drosophila	melanogaster.	It	has	one	annotated	transcript.	Gene	sequence	location	is	2L:2601033..2601721.	It	has	the	cytological	map	location
FBtr0343234	2L_2601315_SNP	G	A	0.0618	11	167	7.31e-05	6.42e-05	0.79905	2L_2601315_SNP	A	SiteClass[FBgn0266024|CR44789|EXON|0],TranscriptAnnot[EXON(MODIFIER|||||CR44789|ncRNA|NON_CODING|FBtr0343234|1|1)]	-
FBgn0032151	2L_9831596_SNP	C	T	0.2139	37	136	6.81e-05	6.43e-05	0.79905	2L_9831596_SNP	C	SiteClass[FBgn0032151|nAChRalpha6|INTRON|0],TranscriptAnnot[INTRON(MODIFIER||||523|nAChRalpha6|protein_coding|CODING|FBtr0079912|2|1);INTRON(MODIFIER||||509|nAChRalpha6|protein_coding|CODING|FBtr0079913|3|1);INTRON(MODIFIER||||494|nAChRalpha6|protein_coding|CODING|FBtr0079914|2|1);INTRON(MODIFIER||||494|nAChRalpha6|protein_coding|CODING|FBtr0079915|3|1);INTRON(MODIFIER||||494|nAChRalpha6|protein_…	-	FBgn0032151	The gene nicotinic Acetylcholine Receptor ??6 is referred to in FlyBase by the symbol Dmel\nAChR??6 (CG4128, FBgn0032151). It is a protein_coding_gene from Drosophila melanogaster. It has 7 annotated transcripts and 7 polypeptides (6 unique). Gene sequence location is 2L:9793317..9886250. It has the cytological map location 30D1-30E1. Protein features are: Neurotransmitter-gated ion-channel; Neur…
FBtr0079912	2L_9831596_SNP	C	T	0.2139	37	136	6.81e-05	6.43e-05	0.79905	2L_9831596_SNP	C	SiteClass[FBgn0032151|nAChRalpha6|INTRON|0],TranscriptAnnot[INTRON(MODIFIER||||523|nAChRalpha6|protein_coding|CODING|FBtr0079912|2|1);INTRON(MODIFIER||||509|nAChRalpha6|protein_coding|CODING|FBtr0079913|3|1);INTRON(MODIFIER||||494|nAChRalpha6|protein_coding|CODING|FBtr0079914|2|1);INTRON(MODIFIER||||494|nAChRalpha6|protein_coding|CODING|FBtr0079915|3|1);INTRON(MODIFIER||||494|nAChRalpha6|protein_…	-
FBtr0079913	2L_9831596_SNP	C	T	0.2139	37	136	6.81e-05	6.43e-05	0.79905	2L_9831596_SNP	C	SiteClass[FBgn0032151|nAChRalpha6|INTRON|0],TranscriptAnnot[INTRON(MODIFIER||||523|nAChRalpha6|protein_coding|CODING|FBtr0079912|2|1);INTRON(MODIFIER||||509|nAChRalpha6|protein_coding|CODING|FBtr0079913|3|1);INTRON(MODIFIER||||494|nAChRalpha6|protein_coding|CODING|FBtr0079914|2|1);INTRON(MODIFIER||||494|nAChRalpha6|protein_coding|CODING|FBtr0079915|3|1);INTRON(MODIFIER||||494|nAChRalpha6|protein_…	-
FBtr0079914	2L_9831596_SNP	C	T	0.2139	37	136	6.81e-05	6.43e-05	0.79905	2L_9831596_SNP	C	SiteClass[FBgn0032151|nAChRalpha6|INTRON|0],TranscriptAnnot[INTRON(MODIFIER||||523|nAChRalpha6|protein_coding|CODING|FBtr0079912|2|1);INTRON(MODIFIER||||509|nAChRalpha6|protein_coding|CODING|FBtr0079913|3|1);INTRON(MODIFIER||||494|nAChRalpha6|protein_coding|CODING|FBtr0079914|2|1);INTRON(MODIFIER||||494|nAChRalpha6|protein_coding|CODING|FBtr0079915|3|1);INTRON(MODIFIER||||494|nAChRalpha6|protein_…	-
FBtr0079915	2L_9831596_SNP	C	T	0.2139	37	136	6.81e-05	6.43e-05	0.79905	2L_9831596_SNP	C	SiteClass[FBgn0032151|nAChRalpha6|INTRON|0],TranscriptAnnot[INTRON(MODIFIER||||523|nAChRalpha6|protein_coding|CODING|FBtr0079912|2|1);INTRON(MODIFIER||||509|nAChRalpha6|protein_coding|CODING|FBtr0079913|3|1);INTRON(MODIFIER||||494|nAChRalpha6|protein_coding|CODING|FBtr0079914|2|1);INTRON(MODIFIER||||494|nAChRalpha6|protein_coding|CODING|FBtr0079915|3|1);INTRON(MODIFIER||||494|nAChRalpha6|protein_…	-
FBtr0079916	2L_9831596_SNP	C	T	0.2139	37	136	6.81e-05	6.43e-05	0.79905	2L_9831596_SNP	C	SiteClass[FBgn0032151|nAChRalpha6|INTRON|0],TranscriptAnnot[INTRON(MODIFIER||||523|nAChRalpha6|protein_coding|CODING|FBtr0079912|2|1);INTRON(MODIFIER||||509|nAChRalpha6|protein_coding|CODING|FBtr0079913|3|1);INTRON(MODIFIER||||494|nAChRalpha6|protein_coding|CODING|FBtr0079914|2|1);INTRON(MODIFIER||||494|nAChRalpha6|protein_coding|CODING|FBtr0079915|3|1);INTRON(MODIFIER||||494|nAChRalpha6|protein_…	-
FBtr0303898	2L_9831596_SNP	C	T	0.2139	37	136	6.81e-05	6.43e-05	0.79905	2L_9831596_SNP	C	SiteClass[FBgn0032151|nAChRalpha6|INTRON|0],TranscriptAnnot[INTRON(MODIFIER||||523|nAChRalpha6|protein_coding|CODING|FBtr0079912|2|1);INTRON(MODIFIER||||509|nAChRalpha6|protein_coding|CODING|FBtr0079913|3|1);INTRON(MODIFIER||||494|nAChRalpha6|protein_coding|CODING|FBtr0079914|2|1);INTRON(MODIFIER||||494|nAChRalpha6|protein_coding|CODING|FBtr0079915|3|1);INTRON(MODIFIER||||494|nAChRalpha6|protein_…	-
FBtr0331284	2L_9831596_SNP	C	T	0.2139	37	136	6.81e-05	6.43e-05	0.79905	2L_9831596_SNP	C	SiteClass[FBgn0032151|nAChRalpha6|INTRON|0],TranscriptAnnot[INTRON(MODIFIER||||523|nAChRalpha6|protein_coding|CODING|FBtr0079912|2|1);INTRON(MODIFIER||||509|nAChRalpha6|protein_coding|CODING|FBtr0079913|3|1);INTRON(MODIFIER||||494|nAChRalpha6|protein_coding|CODING|FBtr0079914|2|1);INTRON(MODIFIER||||494|nAChRalpha6|protein_coding|CODING|FBtr0079915|3|1);INTRON(MODIFIER||||494|nAChRalpha6|protein_…	-
FBgn0052834	2R_18869753_SNP	T	G	0.3293	55	112	8.74e-05	6.5e-05	0.79905	2R_18869753_SNP	G	SiteClass[FBgn0052834|CG32834|DOWNSTREAM|312],TranscriptAnnot[DOWNSTREAM(MODIFIER||312||556|CG32834|protein_coding|CODING|FBtr0303210||1);INTERGENIC(MODIFIER||||||||||1)]	-	FBgn0052834	This gene is referred to in FlyBase by the symbol Dmel\CG32834 (FBgn0052834). It is a protein_coding_gene from Drosophila melanogaster. It has one annotated transcript and one polypeptide. Gene sequence location is 2R:22982542..22984293. It has the cytological map location 59C1. Protein features are: Peptidase S1, PA clan; Peptidase S1A, chymotrypsin-type; Serine proteases, trypsin domain. Its mo…
FBtr0303210	2R_18869753_SNP	T	G	0.3293	55	112	8.74e-05	6.5e-05	0.79905	2R_18869753_SNP	G	SiteClass[FBgn0052834|CG32834|DOWNSTREAM|312],TranscriptAnnot[DOWNSTREAM(MODIFIER||312||556|CG32834|protein_coding|CODING|FBtr0303210||1);INTERGENIC(MODIFIER||||||||||1)]	-
FBgn0026076	X_15745326_SNP	G	A	0.3636	60	105	8.05e-05	6.6e-05	0.79905	X_15745326_SNP	A	SiteClass[FBgn0026076|UBL3|INTRON|0],TranscriptAnnot[INTRON(MODIFIER||||347|UBL3|protein_coding|CODING|FBtr0074174|2|1);INTRON(MODIFIER||||347|UBL3|protein_coding|CODING|FBtr0074175|2|1);INTRON(MODIFIER||||347|UBL3|protein_coding|CODING|FBtr0300787|2|1)]	-	FBgn0026076	The gene UBL3 is referred to in FlyBase by the symbol Dmel\UBL3 (CG9038, FBgn0026076). It is a protein_coding_gene from Drosophila melanogaster. It has 3 annotated transcripts and 3 polypeptides (1 unique). Gene sequence location is X:15849731..15853175. It has the cytological map location 13F13-13F14. Protein features are: Ubiquitin domain; Ubiquitin-related domain. Its molecular function is des…
FBtr0074174	X_15745326_SNP	G	A	0.3636	60	105	8.05e-05	6.6e-05	0.79905	X_15745326_SNP	A	SiteClass[FBgn0026076|UBL3|INTRON|0],TranscriptAnnot[INTRON(MODIFIER||||347|UBL3|protein_coding|CODING|FBtr0074174|2|1);INTRON(MODIFIER||||347|UBL3|protein_coding|CODING|FBtr0074175|2|1);INTRON(MODIFIER||||347|UBL3|protein_coding|CODING|FBtr0300787|2|1)]	-
FBtr0074175	X_15745326_SNP	G	A	0.3636	60	105	8.05e-05	6.6e-05	0.79905	X_15745326_SNP	A	SiteClass[FBgn0026076|UBL3|INTRON|0],TranscriptAnnot[INTRON(MODIFIER||||347|UBL3|protein_coding|CODING|FBtr0074174|2|1);INTRON(MODIFIER||||347|UBL3|protein_coding|CODING|FBtr0074175|2|1);INTRON(MODIFIER||||347|UBL3|protein_coding|CODING|FBtr0300787|2|1)]	-
FBtr0300787	X_15745326_SNP	G	A	0.3636	60	105	8.05e-05	6.6e-05	0.79905	X_15745326_SNP	A	SiteClass[FBgn0026076|UBL3|INTRON|0],TranscriptAnnot[INTRON(MODIFIER||||347|UBL3|protein_coding|CODING|FBtr0074174|2|1);INTRON(MODIFIER||||347|UBL3|protein_coding|CODING|FBtr0074175|2|1);INTRON(MODIFIER||||347|UBL3|protein_coding|CODING|FBtr0300787|2|1)]	-
FBgn0003502	2L_8267236_SNP	T	G	0.375	60	100	7.92e-05	6.61e-05	0.79905	2L_8267236_SNP	G	SiteClass[FBgn0003502|Btk29A|INTRON|0],TranscriptAnnot[INTRON(MODIFIER||||603|Btk29A|protein_coding|CODING|FBtr0079615|2|1);INTRON(MODIFIER||||603|Btk29A|protein_coding|CODING|FBtr0079618|2|1);INTRON(MODIFIER||||603|Btk29A|protein_coding|CODING|FBtr0112835|1|1);INTRON(MODIFIER||||786|Btk29A|protein_coding|CODING|FBtr0079616|5|1);INTRON(MODIFIER||||786|Btk29A|protein_coding|CODING|FBtr0079617|5|1)…	(TF_binding_site|BDTNP1_TFBS_da|FBsf0000321905);(TF_binding_site|BDTNP1_TFBS_dl|FBsf0000297470);(TF_binding_site|BDTNP1_TFBS_sna|FBsf0000268490)	FBgn0003502	The gene Btk family kinase at 29A is referred to in FlyBase by the symbol Dmel\Btk29A (CG8049, FBgn0003502). It is a protein_coding_gene from Drosophila melanogaster. It has 8 annotated transcripts and 8 polypeptides (4 unique). Gene sequence location is 2L:8258373..8301079. It has the cytological map location 29A1-29A3. Protein features are: PH domain-like; Pleckstrin homology domain; Protein ki…
FBtr0079615	2L_8267236_SNP	T	G	0.375	60	100	7.92e-05	6.61e-05	0.79905	2L_8267236_SNP	G	SiteClass[FBgn0003502|Btk29A|INTRON|0],TranscriptAnnot[INTRON(MODIFIER||||603|Btk29A|protein_coding|CODING|FBtr0079615|2|1);INTRON(MODIFIER||||603|Btk29A|protein_coding|CODING|FBtr0079618|2|1);INTRON(MODIFIER||||603|Btk29A|protein_coding|CODING|FBtr0112835|1|1);INTRON(MODIFIER||||786|Btk29A|protein_coding|CODING|FBtr0079616|5|1);INTRON(MODIFIER||||786|Btk29A|protein_coding|CODING|FBtr0079617|5|1)…	(TF_binding_site|BDTNP1_TFBS_da|FBsf0000321905);(TF_binding_site|BDTNP1_TFBS_dl|FBsf0000297470);(TF_binding_site|BDTNP1_TFBS_sna|FBsf0000268490)
FBtr0079618	2L_8267236_SNP	T	G	0.375	60	100	7.92e-05	6.61e-05	0.79905	2L_8267236_SNP	G	SiteClass[FBgn0003502|Btk29A|INTRON|0],TranscriptAnnot[INTRON(MODIFIER||||603|Btk29A|protein_coding|CODING|FBtr0079615|2|1);INTRON(MODIFIER||||603|Btk29A|protein_coding|CODING|FBtr0079618|2|1);INTRON(MODIFIER||||603|Btk29A|protein_coding|CODING|FBtr0112835|1|1);INTRON(MODIFIER||||786|Btk29A|protein_coding|CODING|FBtr0079616|5|1);INTRON(MODIFIER||||786|Btk29A|protein_coding|CODING|FBtr0079617|5|1)…	(TF_binding_site|BDTNP1_TFBS_da|FBsf0000321905);(TF_binding_site|BDTNP1_TFBS_dl|FBsf0000297470);(TF_binding_site|BDTNP1_TFBS_sna|FBsf0000268490)
FBtr0112835	2L_8267236_SNP	T	G	0.375	60	100	7.92e-05	6.61e-05	0.79905	2L_8267236_SNP	G	SiteClass[FBgn0003502|Btk29A|INTRON|0],TranscriptAnnot[INTRON(MODIFIER||||603|Btk29A|protein_coding|CODING|FBtr0079615|2|1);INTRON(MODIFIER||||603|Btk29A|protein_coding|CODING|FBtr0079618|2|1);INTRON(MODIFIER||||603|Btk29A|protein_coding|CODING|FBtr0112835|1|1);INTRON(MODIFIER||||786|Btk29A|protein_coding|CODING|FBtr0079616|5|1);INTRON(MODIFIER||||786|Btk29A|protein_coding|CODING|FBtr0079617|5|1)…	(TF_binding_site|BDTNP1_TFBS_da|FBsf0000321905);(TF_binding_site|BDTNP1_TFBS_dl|FBsf0000297470);(TF_binding_site|BDTNP1_TFBS_sna|FBsf0000268490)
FBtr0079616	2L_8267236_SNP	T	G	0.375	60	100	7.92e-05	6.61e-05	0.79905	2L_8267236_SNP	G	SiteClass[FBgn0003502|Btk29A|INTRON|0],TranscriptAnnot[INTRON(MODIFIER||||603|Btk29A|protein_coding|CODING|FBtr0079615|2|1);INTRON(MODIFIER||||603|Btk29A|protein_coding|CODING|FBtr0079618|2|1);INTRON(MODIFIER||||603|Btk29A|protein_coding|CODING|FBtr0112835|1|1);INTRON(MODIFIER||||786|Btk29A|protein_coding|CODING|FBtr0079616|5|1);INTRON(MODIFIER||||786|Btk29A|protein_coding|CODING|FBtr0079617|5|1)…	(TF_binding_site|BDTNP1_TFBS_da|FBsf0000321905);(TF_binding_site|BDTNP1_TFBS_dl|FBsf0000297470);(TF_binding_site|BDTNP1_TFBS_sna|FBsf0000268490)
FBtr0079617	2L_8267236_SNP	T	G	0.375	60	100	7.92e-05	6.61e-05	0.79905	2L_8267236_SNP	G	SiteClass[FBgn0003502|Btk29A|INTRON|0],TranscriptAnnot[INTRON(MODIFIER||||603|Btk29A|protein_coding|CODING|FBtr0079615|2|1);INTRON(MODIFIER||||603|Btk29A|protein_coding|CODING|FBtr0079618|2|1);INTRON(MODIFIER||||603|Btk29A|protein_coding|CODING|FBtr0112835|1|1);INTRON(MODIFIER||||786|Btk29A|protein_coding|CODING|FBtr0079616|5|1);INTRON(MODIFIER||||786|Btk29A|protein_coding|CODING|FBtr0079617|5|1)…	(TF_binding_site|BDTNP1_TFBS_da|FBsf0000321905);(TF_binding_site|BDTNP1_TFBS_dl|FBsf0000297470);(TF_binding_site|BDTNP1_TFBS_sna|FBsf0000268490)
FBtr0112836	2L_8267236_SNP	T	G	0.375	60	100	7.92e-05	6.61e-05	0.79905	2L_8267236_SNP	G	SiteClass[FBgn0003502|Btk29A|INTRON|0],TranscriptAnnot[INTRON(MODIFIER||||603|Btk29A|protein_coding|CODING|FBtr0079615|2|1);INTRON(MODIFIER||||603|Btk29A|protein_coding|CODING|FBtr0079618|2|1);INTRON(MODIFIER||||603|Btk29A|protein_coding|CODING|FBtr0112835|1|1);INTRON(MODIFIER||||786|Btk29A|protein_coding|CODING|FBtr0079616|5|1);INTRON(MODIFIER||||786|Btk29A|protein_coding|CODING|FBtr0079617|5|1)…	(TF_binding_site|BDTNP1_TFBS_da|FBsf0000321905);(TF_binding_site|BDTNP1_TFBS_dl|FBsf0000297470);(TF_binding_site|BDTNP1_TFBS_sna|FBsf0000268490)
FBtr0330693	2L_8267236_SNP	T	G	0.375	60	100	7.92e-05	6.61e-05	0.79905	2L_8267236_SNP	G	SiteClass[FBgn0003502|Btk29A|INTRON|0],TranscriptAnnot[INTRON(MODIFIER||||603|Btk29A|protein_coding|CODING|FBtr0079615|2|1);INTRON(MODIFIER||||603|Btk29A|protein_coding|CODING|FBtr0079618|2|1);INTRON(MODIFIER||||603|Btk29A|protein_coding|CODING|FBtr0112835|1|1);INTRON(MODIFIER||||786|Btk29A|protein_coding|CODING|FBtr0079616|5|1);INTRON(MODIFIER||||786|Btk29A|protein_coding|CODING|FBtr0079617|5|1)…	(TF_binding_site|BDTNP1_TFBS_da|FBsf0000321905);(TF_binding_site|BDTNP1_TFBS_dl|FBsf0000297470);(TF_binding_site|BDTNP1_TFBS_sna|FBsf0000268490)
FBgn0052600	X_14285777_SNP	T	C	0.09357	16	155	9.35e-05	6.65e-05	0.79905	X_14285777_SNP	C	SiteClass[FBgn0052600|dpr8|INTRON|0],TranscriptAnnot[INTRON(MODIFIER||||344|dpr8|protein_coding|CODING|FBtr0073913|4|1);INTRON(MODIFIER||||344|dpr8|protein_coding|CODING|FBtr0343518|3|1)]	-	FBgn0052600	The gene defective proboscis extension response 8 is referred to in FlyBase by the symbol Dmel\dpr8 (CG32600, FBgn0052600). It is a protein_coding_gene from Drosophila melanogaster. It has 2 annotated transcripts and 2 polypeptides (1 unique). Gene sequence location is X:14322226..14462351. It has the cytological map location 12E8-12E10. Protein features are: Immunoglobulin; Immunoglobulin V-set …
FBtr0073913	X_14285777_SNP	T	C	0.09357	16	155	9.35e-05	6.65e-05	0.79905	X_14285777_SNP	C	SiteClass[FBgn0052600|dpr8|INTRON|0],TranscriptAnnot[INTRON(MODIFIER||||344|dpr8|protein_coding|CODING|FBtr0073913|4|1);INTRON(MODIFIER||||344|dpr8|protein_coding|CODING|FBtr0343518|3|1)]	-
FBtr0343518	X_14285777_SNP	T	C	0.09357	16	155	9.35e-05	6.65e-05	0.79905	X_14285777_SNP	C	SiteClass[FBgn0052600|dpr8|INTRON|0],TranscriptAnnot[INTRON(MODIFIER||||344|dpr8|protein_coding|CODING|FBtr0073913|4|1);INTRON(MODIFIER||||344|dpr8|protein_coding|CODING|FBtr0343518|3|1)]	-
FBgn0041248	2L_2670860_SNP	A	G	0.0791	14	163	9.25e-05	6.69e-05	0.79905	2L_2670860_SNP	G	SiteClass[FBgn0041248|Gr23a|INTRON|0],TranscriptAnnot[UPSTREAM(MODIFIER||63||374|Gr23a|protein_coding|CODING|FBtr0077702||1);INTRON(MODIFIER||||370|Gr23a|protein_coding|CODING|FBtr0273435|1|1)]	-	FBgn0041248	The gene Gustatory receptor 23a is referred to in FlyBase by the symbol Dmel\Gr23a (CG15396, FBgn0041248). It is a protein_coding_gene from Drosophila melanogaster. It has 2 annotated transcripts and 2 polypeptides (all unique). Gene sequence location is 2L:2669823..2672186. It has the cytological map location 23A2. Protein features are: 7TM chemoreceptor. Its molecular function is described by: …
FBtr0077702	2L_2670860_SNP	A	G	0.0791	14	163	9.25e-05	6.69e-05	0.79905	2L_2670860_SNP	G	SiteClass[FBgn0041248|Gr23a|INTRON|0],TranscriptAnnot[UPSTREAM(MODIFIER||63||374|Gr23a|protein_coding|CODING|FBtr0077702||1);INTRON(MODIFIER||||370|Gr23a|protein_coding|CODING|FBtr0273435|1|1)]	-
FBtr0273435	2L_2670860_SNP	A	G	0.0791	14	163	9.25e-05	6.69e-05	0.79905	2L_2670860_SNP	G	SiteClass[FBgn0041248|Gr23a|INTRON|0],TranscriptAnnot[UPSTREAM(MODIFIER||63||374|Gr23a|protein_coding|CODING|FBtr0077702||1);INTRON(MODIFIER||||370|Gr23a|protein_coding|CODING|FBtr0273435|1|1)]	-
FBgn0051438	3R_17235231_SNP	G	A	0.3036	51	117	9.6e-05	6.71e-05	0.79905	3R_17235231_SNP	A	SiteClass[FBgn0051438|CheB93b|SYNONYMOUS_CODING|0;FBgn0008651|lbl|DOWNSTREAM|470],TranscriptAnnot[SYNONYMOUS_CODING(LOW|SILENT|aaA/aaG|K107|203|CheB93b|protein_coding|CODING|FBtr0084090|2|1);DOWNSTREAM(MODIFIER||470||372|lbl|protein_coding|CODING|FBtr0084092||1);DOWNSTREAM(MODIFIER||470||410|lbl|protein_coding|CODING|FBtr0332438||1)]	-	FBgn0051438	The gene Chemosensory protein B 93b is referred to in FlyBase by the symbol Dmel\CheB93b (CG31438, FBgn0051438). It is a protein_coding_gene from Drosophila melanogaster. It has one annotated transcript and one polypeptide. Gene sequence location is 3R:21409123..21409924. It has the cytological map location 93E1. Its molecular function is described by: lipid binding. It is involved in the biologi…
FBgn0008651	3R_17235231_SNP	G	A	0.3036	51	117	9.6e-05	6.71e-05	0.79905	3R_17235231_SNP	A	SiteClass[FBgn0051438|CheB93b|SYNONYMOUS_CODING|0;FBgn0008651|lbl|DOWNSTREAM|470],TranscriptAnnot[SYNONYMOUS_CODING(LOW|SILENT|aaA/aaG|K107|203|CheB93b|protein_coding|CODING|FBtr0084090|2|1);DOWNSTREAM(MODIFIER||470||372|lbl|protein_coding|CODING|FBtr0084092||1);DOWNSTREAM(MODIFIER||470||410|lbl|protein_coding|CODING|FBtr0332438||1)]	-	FBgn0008651	The gene ladybird late is referred to in FlyBase by the symbol Dmel\lbl (CG6570, FBgn0008651). It is a protein_coding_gene from Drosophila melanogaster. It has 3 annotated transcripts and 3 polypeptides (all unique). Gene sequence location is 3R:21409979..21434133. It has the cytological map location 93E1. Protein features are: Helix-turn-helix motif; Homeobox domain; Homeobox, conserved site; Ho…
FBtr0084090	3R_17235231_SNP	G	A	0.3036	51	117	9.6e-05	6.71e-05	0.79905	3R_17235231_SNP	A	SiteClass[FBgn0051438|CheB93b|SYNONYMOUS_CODING|0;FBgn0008651|lbl|DOWNSTREAM|470],TranscriptAnnot[SYNONYMOUS_CODING(LOW|SILENT|aaA/aaG|K107|203|CheB93b|protein_coding|CODING|FBtr0084090|2|1);DOWNSTREAM(MODIFIER||470||372|lbl|protein_coding|CODING|FBtr0084092||1);DOWNSTREAM(MODIFIER||470||410|lbl|protein_coding|CODING|FBtr0332438||1)]	-
FBtr0084092	3R_17235231_SNP	G	A	0.3036	51	117	9.6e-05	6.71e-05	0.79905	3R_17235231_SNP	A	SiteClass[FBgn0051438|CheB93b|SYNONYMOUS_CODING|0;FBgn0008651|lbl|DOWNSTREAM|470],TranscriptAnnot[SYNONYMOUS_CODING(LOW|SILENT|aaA/aaG|K107|203|CheB93b|protein_coding|CODING|FBtr0084090|2|1);DOWNSTREAM(MODIFIER||470||372|lbl|protein_coding|CODING|FBtr0084092||1);DOWNSTREAM(MODIFIER||470||410|lbl|protein_coding|CODING|FBtr0332438||1)]	-
FBtr0332438	3R_17235231_SNP	G	A	0.3036	51	117	9.6e-05	6.71e-05	0.79905	3R_17235231_SNP	A	SiteClass[FBgn0051438|CheB93b|SYNONYMOUS_CODING|0;FBgn0008651|lbl|DOWNSTREAM|470],TranscriptAnnot[SYNONYMOUS_CODING(LOW|SILENT|aaA/aaG|K107|203|CheB93b|protein_coding|CODING|FBtr0084090|2|1);DOWNSTREAM(MODIFIER||470||372|lbl|protein_coding|CODING|FBtr0084092||1);DOWNSTREAM(MODIFIER||470||410|lbl|protein_coding|CODING|FBtr0332438||1)]	-
FBgn0003944	3R_12491303_SNP	C	T	0.1214	21	152	6.54e-05	6.72e-05	0.79905	3R_12491303_SNP	T	SiteClass[FBgn0003944|Ubx|INTRON|0],TranscriptAnnot[INTRON(MODIFIER||||389|Ubx|protein_coding|CODING|FBtr0083347|3|1);INTRON(MODIFIER||||372|Ubx|protein_coding|CODING|FBtr0083349|2|1);INTRON(MODIFIER||||363|Ubx|protein_coding|CODING|FBtr0083350|2|1);INTRON(MODIFIER||||380|Ubx|protein_coding|CODING|FBtr0083351|3|1);INTRON(MODIFIER||||355|Ubx|protein_coding|CODING|FBtr0083352|1|1);INTRON(MODIFIER||…	-	FBgn0003944	The gene Ultrabithorax is referred to in FlyBase by the symbol Dmel\Ubx (CG10388, FBgn0003944). It is a protein_coding_gene from Drosophila melanogaster. It has 6 annotated transcripts and 6 polypeptides (all unique). Gene sequence location is 3R:16656623..16734426. It has the cytological map location 89D6-89D9. Protein features are: Homeobox domain; Homeobox protein, antennapedia type, conserved…
FBtr0083347	3R_12491303_SNP	C	T	0.1214	21	152	6.54e-05	6.72e-05	0.79905	3R_12491303_SNP	T	SiteClass[FBgn0003944|Ubx|INTRON|0],TranscriptAnnot[INTRON(MODIFIER||||389|Ubx|protein_coding|CODING|FBtr0083347|3|1);INTRON(MODIFIER||||372|Ubx|protein_coding|CODING|FBtr0083349|2|1);INTRON(MODIFIER||||363|Ubx|protein_coding|CODING|FBtr0083350|2|1);INTRON(MODIFIER||||380|Ubx|protein_coding|CODING|FBtr0083351|3|1);INTRON(MODIFIER||||355|Ubx|protein_coding|CODING|FBtr0083352|1|1);INTRON(MODIFIER||…	-
FBtr0083349	3R_12491303_SNP	C	T	0.1214	21	152	6.54e-05	6.72e-05	0.79905	3R_12491303_SNP	T	SiteClass[FBgn0003944|Ubx|INTRON|0],TranscriptAnnot[INTRON(MODIFIER||||389|Ubx|protein_coding|CODING|FBtr0083347|3|1);INTRON(MODIFIER||||372|Ubx|protein_coding|CODING|FBtr0083349|2|1);INTRON(MODIFIER||||363|Ubx|protein_coding|CODING|FBtr0083350|2|1);INTRON(MODIFIER||||380|Ubx|protein_coding|CODING|FBtr0083351|3|1);INTRON(MODIFIER||||355|Ubx|protein_coding|CODING|FBtr0083352|1|1);INTRON(MODIFIER||…	-
FBtr0083350	3R_12491303_SNP	C	T	0.1214	21	152	6.54e-05	6.72e-05	0.79905	3R_12491303_SNP	T	SiteClass[FBgn0003944|Ubx|INTRON|0],TranscriptAnnot[INTRON(MODIFIER||||389|Ubx|protein_coding|CODING|FBtr0083347|3|1);INTRON(MODIFIER||||372|Ubx|protein_coding|CODING|FBtr0083349|2|1);INTRON(MODIFIER||||363|Ubx|protein_coding|CODING|FBtr0083350|2|1);INTRON(MODIFIER||||380|Ubx|protein_coding|CODING|FBtr0083351|3|1);INTRON(MODIFIER||||355|Ubx|protein_coding|CODING|FBtr0083352|1|1);INTRON(MODIFIER||…	-
FBtr0083351	3R_12491303_SNP	C	T	0.1214	21	152	6.54e-05	6.72e-05	0.79905	3R_12491303_SNP	T	SiteClass[FBgn0003944|Ubx|INTRON|0],TranscriptAnnot[INTRON(MODIFIER||||389|Ubx|protein_coding|CODING|FBtr0083347|3|1);INTRON(MODIFIER||||372|Ubx|protein_coding|CODING|FBtr0083349|2|1);INTRON(MODIFIER||||363|Ubx|protein_coding|CODING|FBtr0083350|2|1);INTRON(MODIFIER||||380|Ubx|protein_coding|CODING|FBtr0083351|3|1);INTRON(MODIFIER||||355|Ubx|protein_coding|CODING|FBtr0083352|1|1);INTRON(MODIFIER||…	-
FBtr0083352	3R_12491303_SNP	C	T	0.1214	21	152	6.54e-05	6.72e-05	0.79905	3R_12491303_SNP	T	SiteClass[FBgn0003944|Ubx|INTRON|0],TranscriptAnnot[INTRON(MODIFIER||||389|Ubx|protein_coding|CODING|FBtr0083347|3|1);INTRON(MODIFIER||||372|Ubx|protein_coding|CODING|FBtr0083349|2|1);INTRON(MODIFIER||||363|Ubx|protein_coding|CODING|FBtr0083350|2|1);INTRON(MODIFIER||||380|Ubx|protein_coding|CODING|FBtr0083351|3|1);INTRON(MODIFIER||||355|Ubx|protein_coding|CODING|FBtr0083352|1|1);INTRON(MODIFIER||…	-
FBtr0083348	3R_12491303_SNP	C	T	0.1214	21	152	6.54e-05	6.72e-05	0.79905	3R_12491303_SNP	T	SiteClass[FBgn0003944|Ubx|INTRON|0],TranscriptAnnot[INTRON(MODIFIER||||389|Ubx|protein_coding|CODING|FBtr0083347|3|1);INTRON(MODIFIER||||372|Ubx|protein_coding|CODING|FBtr0083349|2|1);INTRON(MODIFIER||||363|Ubx|protein_coding|CODING|FBtr0083350|2|1);INTRON(MODIFIER||||380|Ubx|protein_coding|CODING|FBtr0083351|3|1);INTRON(MODIFIER||||355|Ubx|protein_coding|CODING|FBtr0083352|1|1);INTRON(MODIFIER||…	-
FBgn0028699	3L_4914373_SNP	T	A	0.4624	80	93	7.65e-05	6.73e-05	0.79905	3L_4914373_SNP	T	SiteClass[FBgn0028699|Rh50|INTRON|0],TranscriptAnnot[INTRON(MODIFIER||||449|Rh50|protein_coding|CODING|FBtr0073354|4|1);INTRON(MODIFIER||||460|Rh50|protein_coding|CODING|FBtr0331423|4|1);INTRON(MODIFIER||||460|Rh50|protein_coding|CODING|FBtr0345597|4|1)]	-	FBgn0028699	The gene Rh50 is referred to in FlyBase by the symbol Dmel\Rh50 (CG7499, FBgn0028699). It is a protein_coding_gene from Drosophila melanogaster. It has 3 annotated transcripts and 3 polypeptides (2 unique). Gene sequence location is 3L:4910368..4920198. It has the cytological map location 64C2. Protein features are: Ammonium transporter; Ammonium transporter AmtB-like domain; Ammonium/urea transp…
FBtr0073354	3L_4914373_SNP	T	A	0.4624	80	93	7.65e-05	6.73e-05	0.79905	3L_4914373_SNP	T	SiteClass[FBgn0028699|Rh50|INTRON|0],TranscriptAnnot[INTRON(MODIFIER||||449|Rh50|protein_coding|CODING|FBtr0073354|4|1);INTRON(MODIFIER||||460|Rh50|protein_coding|CODING|FBtr0331423|4|1);INTRON(MODIFIER||||460|Rh50|protein_coding|CODING|FBtr0345597|4|1)]	-
FBtr0331423	3L_4914373_SNP	T	A	0.4624	80	93	7.65e-05	6.73e-05	0.79905	3L_4914373_SNP	T	SiteClass[FBgn0028699|Rh50|INTRON|0],TranscriptAnnot[INTRON(MODIFIER||||449|Rh50|protein_coding|CODING|FBtr0073354|4|1);INTRON(MODIFIER||||460|Rh50|protein_coding|CODING|FBtr0331423|4|1);INTRON(MODIFIER||||460|Rh50|protein_coding|CODING|FBtr0345597|4|1)]	-
FBtr0345597	3L_4914373_SNP	T	A	0.4624	80	93	7.65e-05	6.73e-05	0.79905	3L_4914373_SNP	T	SiteClass[FBgn0028699|Rh50|INTRON|0],TranscriptAnnot[INTRON(MODIFIER||||449|Rh50|protein_coding|CODING|FBtr0073354|4|1);INTRON(MODIFIER||||460|Rh50|protein_coding|CODING|FBtr0331423|4|1);INTRON(MODIFIER||||460|Rh50|protein_coding|CODING|FBtr0345597|4|1)]	-
FBgn0034277	2R_13652962_SNP	T	C	0.1243	22	155	9.15e-05	6.74e-05	0.79905	2R_13652962_SNP	C	SiteClass[FBgn0034277|OstDelta|SYNONYMOUS_CODING|0;FBgn0027572|CG5009|DOWNSTREAM|916;FBgn0263629|mir-3643|DOWNSTREAM|936],TranscriptAnnot[SYNONYMOUS_CODING(LOW|SILENT|caG/caA|Q396|633|OstDelta|protein_coding|CODING|FBtr0340276|3|1);SYNONYMOUS_CODING(LOW|SILENT|caG/caA|Q396|634|OstDelta|protein_coding|CODING|FBtr0089559|3|1);DOWNSTREAM(MODIFIER||916||669|CG5009|protein_coding|CODING|FBtr0089548||1…	(TF_binding_site|mE1_TFBS_cad|FBsf0000246898);(TF_binding_site|mE1_TFBS_sens|FBsf0000228649)	FBgn0034277	The gene Oligosaccharide transferase ?? subunit is referred to in FlyBase by the symbol Dmel\Ost?? (CG6370, FBgn0034277). It is a protein_coding_gene from Drosophila melanogaster. It has 2 annotated transcripts and 2 polypeptides (all unique). Gene sequence location is 2R:17764574..17767070. It has the cytological map location 54E8. Protein features are: Dolichyl-diphosphooligosaccharide--protein…
FBgn0027572	2R_13652962_SNP	T	C	0.1243	22	155	9.15e-05	6.74e-05	0.79905	2R_13652962_SNP	C	SiteClass[FBgn0034277|OstDelta|SYNONYMOUS_CODING|0;FBgn0027572|CG5009|DOWNSTREAM|916;FBgn0263629|mir-3643|DOWNSTREAM|936],TranscriptAnnot[SYNONYMOUS_CODING(LOW|SILENT|caG/caA|Q396|633|OstDelta|protein_coding|CODING|FBtr0340276|3|1);SYNONYMOUS_CODING(LOW|SILENT|caG/caA|Q396|634|OstDelta|protein_coding|CODING|FBtr0089559|3|1);DOWNSTREAM(MODIFIER||916||669|CG5009|protein_coding|CODING|FBtr0089548||1…	(TF_binding_site|mE1_TFBS_cad|FBsf0000246898);(TF_binding_site|mE1_TFBS_sens|FBsf0000228649)	FBgn0027572	This gene is referred to in FlyBase by the symbol Dmel\CG5009 (FBgn0027572). It is a protein_coding_gene from Drosophila melanogaster. It has one annotated transcript and one polypeptide. Gene sequence location is 2R:17760940..17764541. It has the cytological map location 54E8. Protein features are: Acyl-CoA dehydrogenase/oxidase C-terminal; Acyl-CoA dehydrogenase/oxidase, N-terminal; Acyl-CoA de…
FBgn0263629	2R_13652962_SNP	T	C	0.1243	22	155	9.15e-05	6.74e-05	0.79905	2R_13652962_SNP	C	SiteClass[FBgn0034277|OstDelta|SYNONYMOUS_CODING|0;FBgn0027572|CG5009|DOWNSTREAM|916;FBgn0263629|mir-3643|DOWNSTREAM|936],TranscriptAnnot[SYNONYMOUS_CODING(LOW|SILENT|caG/caA|Q396|633|OstDelta|protein_coding|CODING|FBtr0340276|3|1);SYNONYMOUS_CODING(LOW|SILENT|caG/caA|Q396|634|OstDelta|protein_coding|CODING|FBtr0089559|3|1);DOWNSTREAM(MODIFIER||916||669|CG5009|protein_coding|CODING|FBtr0089548||1…	(TF_binding_site|mE1_TFBS_cad|FBsf0000246898);(TF_binding_site|mE1_TFBS_sens|FBsf0000228649)	FBgn0263629	The gene mir-3643 stem loop is referred to in FlyBase by the symbol Dmel\mir-3643 (CR43509, FBgn0263629). It is a miRNA_gene from Drosophila melanogaster. It has one annotated transcript. Gene sequence location is 2R:17766393..17766460. It has the cytological map location 54E8. Its molecular function is unknown. The biological processes in which it is involved are not known. One allele is reporte…
FBtr0340276	2R_13652962_SNP	T	C	0.1243	22	155	9.15e-05	6.74e-05	0.79905	2R_13652962_SNP	C	SiteClass[FBgn0034277|OstDelta|SYNONYMOUS_CODING|0;FBgn0027572|CG5009|DOWNSTREAM|916;FBgn0263629|mir-3643|DOWNSTREAM|936],TranscriptAnnot[SYNONYMOUS_CODING(LOW|SILENT|caG/caA|Q396|633|OstDelta|protein_coding|CODING|FBtr0340276|3|1);SYNONYMOUS_CODING(LOW|SILENT|caG/caA|Q396|634|OstDelta|protein_coding|CODING|FBtr0089559|3|1);DOWNSTREAM(MODIFIER||916||669|CG5009|protein_coding|CODING|FBtr0089548||1…	(TF_binding_site|mE1_TFBS_cad|FBsf0000246898);(TF_binding_site|mE1_TFBS_sens|FBsf0000228649)
FBtr0089559	2R_13652962_SNP	T	C	0.1243	22	155	9.15e-05	6.74e-05	0.79905	2R_13652962_SNP	C	SiteClass[FBgn0034277|OstDelta|SYNONYMOUS_CODING|0;FBgn0027572|CG5009|DOWNSTREAM|916;FBgn0263629|mir-3643|DOWNSTREAM|936],TranscriptAnnot[SYNONYMOUS_CODING(LOW|SILENT|caG/caA|Q396|633|OstDelta|protein_coding|CODING|FBtr0340276|3|1);SYNONYMOUS_CODING(LOW|SILENT|caG/caA|Q396|634|OstDelta|protein_coding|CODING|FBtr0089559|3|1);DOWNSTREAM(MODIFIER||916||669|CG5009|protein_coding|CODING|FBtr0089548||1…	(TF_binding_site|mE1_TFBS_cad|FBsf0000246898);(TF_binding_site|mE1_TFBS_sens|FBsf0000228649)
FBtr0089548	2R_13652962_SNP	T	C	0.1243	22	155	9.15e-05	6.74e-05	0.79905	2R_13652962_SNP	C	SiteClass[FBgn0034277|OstDelta|SYNONYMOUS_CODING|0;FBgn0027572|CG5009|DOWNSTREAM|916;FBgn0263629|mir-3643|DOWNSTREAM|936],TranscriptAnnot[SYNONYMOUS_CODING(LOW|SILENT|caG/caA|Q396|633|OstDelta|protein_coding|CODING|FBtr0340276|3|1);SYNONYMOUS_CODING(LOW|SILENT|caG/caA|Q396|634|OstDelta|protein_coding|CODING|FBtr0089559|3|1);DOWNSTREAM(MODIFIER||916||669|CG5009|protein_coding|CODING|FBtr0089548||1…	(TF_binding_site|mE1_TFBS_cad|FBsf0000246898);(TF_binding_site|mE1_TFBS_sens|FBsf0000228649)
FBtr0309601	2R_13652962_SNP	T	C	0.1243	22	155	9.15e-05	6.74e-05	0.79905	2R_13652962_SNP	C	SiteClass[FBgn0034277|OstDelta|SYNONYMOUS_CODING|0;FBgn0027572|CG5009|DOWNSTREAM|916;FBgn0263629|mir-3643|DOWNSTREAM|936],TranscriptAnnot[SYNONYMOUS_CODING(LOW|SILENT|caG/caA|Q396|633|OstDelta|protein_coding|CODING|FBtr0340276|3|1);SYNONYMOUS_CODING(LOW|SILENT|caG/caA|Q396|634|OstDelta|protein_coding|CODING|FBtr0089559|3|1);DOWNSTREAM(MODIFIER||916||669|CG5009|protein_coding|CODING|FBtr0089548||1…	(TF_binding_site|mE1_TFBS_cad|FBsf0000246898);(TF_binding_site|mE1_TFBS_sens|FBsf0000228649)
FBtr0309603	2R_13652962_SNP	T	C	0.1243	22	155	9.15e-05	6.74e-05	0.79905	2R_13652962_SNP	C	SiteClass[FBgn0034277|OstDelta|SYNONYMOUS_CODING|0;FBgn0027572|CG5009|DOWNSTREAM|916;FBgn0263629|mir-3643|DOWNSTREAM|936],TranscriptAnnot[SYNONYMOUS_CODING(LOW|SILENT|caG/caA|Q396|633|OstDelta|protein_coding|CODING|FBtr0340276|3|1);SYNONYMOUS_CODING(LOW|SILENT|caG/caA|Q396|634|OstDelta|protein_coding|CODING|FBtr0089559|3|1);DOWNSTREAM(MODIFIER||916||669|CG5009|protein_coding|CODING|FBtr0089548||1…	(TF_binding_site|mE1_TFBS_cad|FBsf0000246898);(TF_binding_site|mE1_TFBS_sens|FBsf0000228649)
FBtr0309602	2R_13652962_SNP	T	C	0.1243	22	155	9.15e-05	6.74e-05	0.79905	2R_13652962_SNP	C	SiteClass[FBgn0034277|OstDelta|SYNONYMOUS_CODING|0;FBgn0027572|CG5009|DOWNSTREAM|916;FBgn0263629|mir-3643|DOWNSTREAM|936],TranscriptAnnot[SYNONYMOUS_CODING(LOW|SILENT|caG/caA|Q396|633|OstDelta|protein_coding|CODING|FBtr0340276|3|1);SYNONYMOUS_CODING(LOW|SILENT|caG/caA|Q396|634|OstDelta|protein_coding|CODING|FBtr0089559|3|1);DOWNSTREAM(MODIFIER||916||669|CG5009|protein_coding|CODING|FBtr0089548||1…	(TF_binding_site|mE1_TFBS_cad|FBsf0000246898);(TF_binding_site|mE1_TFBS_sens|FBsf0000228649)
FBgn0004842	3R_22870553_SNP	A	G	0.2988	49	115	9.1e-05	6.82e-05	0.79905	3R_22870553_SNP	A	SiteClass[FBgn0004842|RYa-R|INTRON|0],TranscriptAnnot[INTRON(MODIFIER||||464|RYa-R|protein_coding|CODING|FBtr0085100|4|1);INTRON(MODIFIER||||518|RYa-R|protein_coding|CODING|FBtr0345267|4|1);INTRON(MODIFIER||||467|RYa-R|protein_coding|CODING|FBtr0345268|4|1)]	-	FBgn0004842	The gene RYamide receptor is referred to in FlyBase by the symbol Dmel\RYa-R (CG5811, FBgn0004842). It is a protein_coding_gene from Drosophila melanogaster. It has 3 annotated transcripts and 3 polypeptides (all unique). Gene sequence location is 3R:26996980..27057935. It has the cytological map location 97D12-97E1. Protein features are: G protein-coupled receptor, rhodopsin-like; GPCR, rhodopsi…
FBtr0085100	3R_22870553_SNP	A	G	0.2988	49	115	9.1e-05	6.82e-05	0.79905	3R_22870553_SNP	A	SiteClass[FBgn0004842|RYa-R|INTRON|0],TranscriptAnnot[INTRON(MODIFIER||||464|RYa-R|protein_coding|CODING|FBtr0085100|4|1);INTRON(MODIFIER||||518|RYa-R|protein_coding|CODING|FBtr0345267|4|1);INTRON(MODIFIER||||467|RYa-R|protein_coding|CODING|FBtr0345268|4|1)]	-
FBtr0345267	3R_22870553_SNP	A	G	0.2988	49	115	9.1e-05	6.82e-05	0.79905	3R_22870553_SNP	A	SiteClass[FBgn0004842|RYa-R|INTRON|0],TranscriptAnnot[INTRON(MODIFIER||||464|RYa-R|protein_coding|CODING|FBtr0085100|4|1);INTRON(MODIFIER||||518|RYa-R|protein_coding|CODING|FBtr0345267|4|1);INTRON(MODIFIER||||467|RYa-R|protein_coding|CODING|FBtr0345268|4|1)]	-
FBtr0345268	3R_22870553_SNP	A	G	0.2988	49	115	9.1e-05	6.82e-05	0.79905	3R_22870553_SNP	A	SiteClass[FBgn0004842|RYa-R|INTRON|0],TranscriptAnnot[INTRON(MODIFIER||||464|RYa-R|protein_coding|CODING|FBtr0085100|4|1);INTRON(MODIFIER||||518|RYa-R|protein_coding|CODING|FBtr0345267|4|1);INTRON(MODIFIER||||467|RYa-R|protein_coding|CODING|FBtr0345268|4|1)]	-
FBgn0267001	X_12195828_SNP	A	C	0.1761	31	145	5.58e-05	6.84e-05	0.79905	X_12195828_SNP	C	SiteClass[FBgn0267001|Ten-a|INTRON|0],TranscriptAnnot[INTRON(MODIFIER||||3004|Ten-a|protein_coding|CODING|FBtr0299858|9|1);INTRON(MODIFIER||||3378|Ten-a|protein_coding|CODING|FBtr0299859|13|1);INTRON(MODIFIER||||3004|Ten-a|protein_coding|CODING|FBtr0299860|14|1);INTRON(MODIFIER||||2902|Ten-a|protein_coding|CODING|FBtr0300201|8|1);INTRON(MODIFIER||||3004|Ten-a|protein_coding|CODING|FBtr0300203|15|…	-	FBgn0267001	The gene Tenascin accessory is referred to in FlyBase by the symbol Dmel\Ten-a (CG42338, FBgn0267001). It is a protein_coding_gene from Drosophila melanogaster. It has 11 annotated transcripts and 11 polypeptides (5 unique). Gene sequence location is X:12043698..12335214. It has the cytological map location 11A6. Protein features are: EGF-like domain; EGF-like domain, extracellular; EGF-like, con…
FBtr0299858	X_12195828_SNP	A	C	0.1761	31	145	5.58e-05	6.84e-05	0.79905	X_12195828_SNP	C	SiteClass[FBgn0267001|Ten-a|INTRON|0],TranscriptAnnot[INTRON(MODIFIER||||3004|Ten-a|protein_coding|CODING|FBtr0299858|9|1);INTRON(MODIFIER||||3378|Ten-a|protein_coding|CODING|FBtr0299859|13|1);INTRON(MODIFIER||||3004|Ten-a|protein_coding|CODING|FBtr0299860|14|1);INTRON(MODIFIER||||2902|Ten-a|protein_coding|CODING|FBtr0300201|8|1);INTRON(MODIFIER||||3004|Ten-a|protein_coding|CODING|FBtr0300203|15|…	-
FBtr0299859	X_12195828_SNP	A	C	0.1761	31	145	5.58e-05	6.84e-05	0.79905	X_12195828_SNP	C	SiteClass[FBgn0267001|Ten-a|INTRON|0],TranscriptAnnot[INTRON(MODIFIER||||3004|Ten-a|protein_coding|CODING|FBtr0299858|9|1);INTRON(MODIFIER||||3378|Ten-a|protein_coding|CODING|FBtr0299859|13|1);INTRON(MODIFIER||||3004|Ten-a|protein_coding|CODING|FBtr0299860|14|1);INTRON(MODIFIER||||2902|Ten-a|protein_coding|CODING|FBtr0300201|8|1);INTRON(MODIFIER||||3004|Ten-a|protein_coding|CODING|FBtr0300203|15|…	-
FBtr0299860	X_12195828_SNP	A	C	0.1761	31	145	5.58e-05	6.84e-05	0.79905	X_12195828_SNP	C	SiteClass[FBgn0267001|Ten-a|INTRON|0],TranscriptAnnot[INTRON(MODIFIER||||3004|Ten-a|protein_coding|CODING|FBtr0299858|9|1);INTRON(MODIFIER||||3378|Ten-a|protein_coding|CODING|FBtr0299859|13|1);INTRON(MODIFIER||||3004|Ten-a|protein_coding|CODING|FBtr0299860|14|1);INTRON(MODIFIER||||2902|Ten-a|protein_coding|CODING|FBtr0300201|8|1);INTRON(MODIFIER||||3004|Ten-a|protein_coding|CODING|FBtr0300203|15|…	-
FBtr0300201	X_12195828_SNP	A	C	0.1761	31	145	5.58e-05	6.84e-05	0.79905	X_12195828_SNP	C	SiteClass[FBgn0267001|Ten-a|INTRON|0],TranscriptAnnot[INTRON(MODIFIER||||3004|Ten-a|protein_coding|CODING|FBtr0299858|9|1);INTRON(MODIFIER||||3378|Ten-a|protein_coding|CODING|FBtr0299859|13|1);INTRON(MODIFIER||||3004|Ten-a|protein_coding|CODING|FBtr0299860|14|1);INTRON(MODIFIER||||2902|Ten-a|protein_coding|CODING|FBtr0300201|8|1);INTRON(MODIFIER||||3004|Ten-a|protein_coding|CODING|FBtr0300203|15|…	-
FBtr0300203	X_12195828_SNP	A	C	0.1761	31	145	5.58e-05	6.84e-05	0.79905	X_12195828_SNP	C	SiteClass[FBgn0267001|Ten-a|INTRON|0],TranscriptAnnot[INTRON(MODIFIER||||3004|Ten-a|protein_coding|CODING|FBtr0299858|9|1);INTRON(MODIFIER||||3378|Ten-a|protein_coding|CODING|FBtr0299859|13|1);INTRON(MODIFIER||||3004|Ten-a|protein_coding|CODING|FBtr0299860|14|1);INTRON(MODIFIER||||2902|Ten-a|protein_coding|CODING|FBtr0300201|8|1);INTRON(MODIFIER||||3004|Ten-a|protein_coding|CODING|FBtr0300203|15|…	-
FBtr0308221	X_12195828_SNP	A	C	0.1761	31	145	5.58e-05	6.84e-05	0.79905	X_12195828_SNP	C	SiteClass[FBgn0267001|Ten-a|INTRON|0],TranscriptAnnot[INTRON(MODIFIER||||3004|Ten-a|protein_coding|CODING|FBtr0299858|9|1);INTRON(MODIFIER||||3378|Ten-a|protein_coding|CODING|FBtr0299859|13|1);INTRON(MODIFIER||||3004|Ten-a|protein_coding|CODING|FBtr0299860|14|1);INTRON(MODIFIER||||2902|Ten-a|protein_coding|CODING|FBtr0300201|8|1);INTRON(MODIFIER||||3004|Ten-a|protein_coding|CODING|FBtr0300203|15|…	-
FBtr0310078	X_12195828_SNP	A	C	0.1761	31	145	5.58e-05	6.84e-05	0.79905	X_12195828_SNP	C	SiteClass[FBgn0267001|Ten-a|INTRON|0],TranscriptAnnot[INTRON(MODIFIER||||3004|Ten-a|protein_coding|CODING|FBtr0299858|9|1);INTRON(MODIFIER||||3378|Ten-a|protein_coding|CODING|FBtr0299859|13|1);INTRON(MODIFIER||||3004|Ten-a|protein_coding|CODING|FBtr0299860|14|1);INTRON(MODIFIER||||2902|Ten-a|protein_coding|CODING|FBtr0300201|8|1);INTRON(MODIFIER||||3004|Ten-a|protein_coding|CODING|FBtr0300203|15|…	-
FBtr0346335	X_12195828_SNP	A	C	0.1761	31	145	5.58e-05	6.84e-05	0.79905	X_12195828_SNP	C	SiteClass[FBgn0267001|Ten-a|INTRON|0],TranscriptAnnot[INTRON(MODIFIER||||3004|Ten-a|protein_coding|CODING|FBtr0299858|9|1);INTRON(MODIFIER||||3378|Ten-a|protein_coding|CODING|FBtr0299859|13|1);INTRON(MODIFIER||||3004|Ten-a|protein_coding|CODING|FBtr0299860|14|1);INTRON(MODIFIER||||2902|Ten-a|protein_coding|CODING|FBtr0300201|8|1);INTRON(MODIFIER||||3004|Ten-a|protein_coding|CODING|FBtr0300203|15|…	-
FBtr0308222	X_12195828_SNP	A	C	0.1761	31	145	5.58e-05	6.84e-05	0.79905	X_12195828_SNP	C	SiteClass[FBgn0267001|Ten-a|INTRON|0],TranscriptAnnot[INTRON(MODIFIER||||3004|Ten-a|protein_coding|CODING|FBtr0299858|9|1);INTRON(MODIFIER||||3378|Ten-a|protein_coding|CODING|FBtr0299859|13|1);INTRON(MODIFIER||||3004|Ten-a|protein_coding|CODING|FBtr0299860|14|1);INTRON(MODIFIER||||2902|Ten-a|protein_coding|CODING|FBtr0300201|8|1);INTRON(MODIFIER||||3004|Ten-a|protein_coding|CODING|FBtr0300203|15|…	-
FBtr0308223	X_12195828_SNP	A	C	0.1761	31	145	5.58e-05	6.84e-05	0.79905	X_12195828_SNP	C	SiteClass[FBgn0267001|Ten-a|INTRON|0],TranscriptAnnot[INTRON(MODIFIER||||3004|Ten-a|protein_coding|CODING|FBtr0299858|9|1);INTRON(MODIFIER||||3378|Ten-a|protein_coding|CODING|FBtr0299859|13|1);INTRON(MODIFIER||||3004|Ten-a|protein_coding|CODING|FBtr0299860|14|1);INTRON(MODIFIER||||2902|Ten-a|protein_coding|CODING|FBtr0300201|8|1);INTRON(MODIFIER||||3004|Ten-a|protein_coding|CODING|FBtr0300203|15|…	-
FBtr0346129	X_12195828_SNP	A	C	0.1761	31	145	5.58e-05	6.84e-05	0.79905	X_12195828_SNP	C	SiteClass[FBgn0267001|Ten-a|INTRON|0],TranscriptAnnot[INTRON(MODIFIER||||3004|Ten-a|protein_coding|CODING|FBtr0299858|9|1);INTRON(MODIFIER||||3378|Ten-a|protein_coding|CODING|FBtr0299859|13|1);INTRON(MODIFIER||||3004|Ten-a|protein_coding|CODING|FBtr0299860|14|1);INTRON(MODIFIER||||2902|Ten-a|protein_coding|CODING|FBtr0300201|8|1);INTRON(MODIFIER||||3004|Ten-a|protein_coding|CODING|FBtr0300203|15|…	-
FBgn0260971	X_4798622_SNP	T	C	0.1186	21	156	7.02e-05	6.9e-05	0.79905	X_4798622_SNP	C	SiteClass[FBgn0260971|CG42594|SYNONYMOUS_CODING|0],TranscriptAnnot[SYNONYMOUS_CODING(LOW|SILENT|taC/taT|Y831|1039|CG42594|protein_coding|CODING|FBtr0345703|7|1);SYNONYMOUS_CODING(LOW|SILENT|taC/taT|Y831|905|CG42594|protein_coding|CODING|FBtr0345704|7|1);SYNONYMOUS_CODING(LOW|SILENT|taC/taT|Y831|905|CG42594|protein_coding|CODING|FBtr0301749|7|1)]	(TF_binding_site|mE1_TFBS_chinmo|FBsf0000208317);(TF_binding_site|mE1_TFBS_HSA|FBsf0000379345)	FBgn0260971	This	gene	is	referred	to	in	FlyBase	by	the	symbol	Dmel\CG42594	(FBgn0260971).	It	is	a	protein_coding_gene	from	Drosophila	melanogaster.	It	has	3	annotated	transcripts	and	3	polypeptides	(2	unique).	Gene	sequence	location	is	X:4840833..4906575.	It
FBtr0345703	X_4798622_SNP	T	C	0.1186	21	156	7.02e-05	6.9e-05	0.79905	X_4798622_SNP	C	SiteClass[FBgn0260971|CG42594|SYNONYMOUS_CODING|0],TranscriptAnnot[SYNONYMOUS_CODING(LOW|SILENT|taC/taT|Y831|1039|CG42594|protein_coding|CODING|FBtr0345703|7|1);SYNONYMOUS_CODING(LOW|SILENT|taC/taT|Y831|905|CG42594|protein_coding|CODING|FBtr0345704|7|1);SYNONYMOUS_CODING(LOW|SILENT|taC/taT|Y831|905|CG42594|protein_coding|CODING|FBtr0301749|7|1)]	(TF_binding_site|mE1_TFBS_chinmo|FBsf0000208317);(TF_binding_site|mE1_TFBS_HSA|FBsf0000379345)
FBtr0345704	X_4798622_SNP	T	C	0.1186	21	156	7.02e-05	6.9e-05	0.79905	X_4798622_SNP	C	SiteClass[FBgn0260971|CG42594|SYNONYMOUS_CODING|0],TranscriptAnnot[SYNONYMOUS_CODING(LOW|SILENT|taC/taT|Y831|1039|CG42594|protein_coding|CODING|FBtr0345703|7|1);SYNONYMOUS_CODING(LOW|SILENT|taC/taT|Y831|905|CG42594|protein_coding|CODING|FBtr0345704|7|1);SYNONYMOUS_CODING(LOW|SILENT|taC/taT|Y831|905|CG42594|protein_coding|CODING|FBtr0301749|7|1)]	(TF_binding_site|mE1_TFBS_chinmo|FBsf0000208317);(TF_binding_site|mE1_TFBS_HSA|FBsf0000379345)
FBtr0301749	X_4798622_SNP	T	C	0.1186	21	156	7.02e-05	6.9e-05	0.79905	X_4798622_SNP	C	SiteClass[FBgn0260971|CG42594|SYNONYMOUS_CODING|0],TranscriptAnnot[SYNONYMOUS_CODING(LOW|SILENT|taC/taT|Y831|1039|CG42594|protein_coding|CODING|FBtr0345703|7|1);SYNONYMOUS_CODING(LOW|SILENT|taC/taT|Y831|905|CG42594|protein_coding|CODING|FBtr0345704|7|1);SYNONYMOUS_CODING(LOW|SILENT|taC/taT|Y831|905|CG42594|protein_coding|CODING|FBtr0301749|7|1)]	(TF_binding_site|mE1_TFBS_chinmo|FBsf0000208317);(TF_binding_site|mE1_TFBS_HSA|FBsf0000379345)
FBgn0265728	3L_2009965_SNP	C	T	0.4798	83	90	5.99e-05	6.91e-05	0.79905	3L_2009965_SNP	T	SiteClass[FBgn0265728|CR44535|DOWNSTREAM|184],TranscriptAnnot[DOWNSTREAM(MODIFIER||184|||CR44535|ncRNA|NON_CODING|FBtr0340684||1);EXON(MODIFIER|||||CR44535|ncRNA|NON_CODING|FBtr0340685|1|1)]	-	FBgn0265728	This	gene	is	referred	to	in	FlyBase	by	the	symbol	Dmel\CR44535	(FBgn0265728).	It	is	a	non_protein_coding_gene	from	Drosophila	melanogaster.	It	has	2	annotated	transcripts.	Gene	sequence	location	is	3L:2008722..2010751.	It	has	the	cytological	map	location
FBtr0340684	3L_2009965_SNP	C	T	0.4798	83	90	5.99e-05	6.91e-05	0.79905	3L_2009965_SNP	T	SiteClass[FBgn0265728|CR44535|DOWNSTREAM|184],TranscriptAnnot[DOWNSTREAM(MODIFIER||184|||CR44535|ncRNA|NON_CODING|FBtr0340684||1);EXON(MODIFIER|||||CR44535|ncRNA|NON_CODING|FBtr0340685|1|1)]	-
FBtr0340685	3L_2009965_SNP	C	T	0.4798	83	90	5.99e-05	6.91e-05	0.79905	3L_2009965_SNP	T	SiteClass[FBgn0265728|CR44535|DOWNSTREAM|184],TranscriptAnnot[DOWNSTREAM(MODIFIER||184|||CR44535|ncRNA|NON_CODING|FBtr0340684||1);EXON(MODIFIER|||||CR44535|ncRNA|NON_CODING|FBtr0340685|1|1)]	-
FBgn0035956	3L_9011421_SNP	A	G	0.4885	85	89	9.39e-05	6.95e-05	0.79905	3L_9011421_SNP	G	SiteClass[FBgn0035956|Doc2|INTRON|0],TranscriptAnnot[INTRON(MODIFIER||||469|Doc2|protein_coding|CODING|FBtr0076547|1|1)]	(TF_binding_site|BDTNP1_TFBS_dl|FBsf0000306389);(TF_binding_site|BDTNP1_TFBS_Med|FBsf0000282560);(TF_binding_site|BDTNP1_TFBS_prd|FBsf0000275480);(TF_binding_site|BDTNP1_TFBS_twi|FBsf0000203284);(TF_binding_site|mE1_TFBS_cad|FBsf0000244559)	FBgn0035956	The gene Dorsocross2 is referred to in FlyBase by the symbol Dmel\Doc2 (CG5187, FBgn0035956). It is a protein_coding_gene from Drosophila melanogaster. It has one annotated transcript and one polypeptide. Gene sequence location is 3L:9012686..9019246. It has the cytological map location 66F1. Protein features are: Transcription factor, Brachyury; Transcription factor, T-box; Transcription factor,…
FBtr0076547	3L_9011421_SNP	A	G	0.4885	85	89	9.39e-05	6.95e-05	0.79905	3L_9011421_SNP	G	SiteClass[FBgn0035956|Doc2|INTRON|0],TranscriptAnnot[INTRON(MODIFIER||||469|Doc2|protein_coding|CODING|FBtr0076547|1|1)]	(TF_binding_site|BDTNP1_TFBS_dl|FBsf0000306389);(TF_binding_site|BDTNP1_TFBS_Med|FBsf0000282560);(TF_binding_site|BDTNP1_TFBS_prd|FBsf0000275480);(TF_binding_site|BDTNP1_TFBS_twi|FBsf0000203284);(TF_binding_site|mE1_TFBS_cad|FBsf0000244559)
FBgn0260429	2R_11503655_SNP	A	C	0.12	21	154	7.57e-05	7.15e-05	0.79905	2R_11503655_SNP	C	SiteClass[FBgn0260429|CG42524|INTRON|0],TranscriptAnnot[INTRON(MODIFIER||||85|CG42524|protein_coding|CODING|FBtr0300853|1|1);INTRON(MODIFIER||||85|CG42524|protein_coding|CODING|FBtr0304712|1|1);INTRON(MODIFIER||||85|CG42524|protein_coding|CODING|FBtr0340006|1|1)]	-	FBgn0260429	This	gene	is	referred	to	in	FlyBase	by	the	symbol	Dmel\CG42524	(FBgn0260429).	It	is	a	protein_coding_gene	from	Drosophila	melanogaster.	It	has	3	annotated	transcripts	and	3	polypeptides	(1	unique).	Gene	sequence	location	is	2R:15613854..15657214.	It
FBtr0300853	2R_11503655_SNP	A	C	0.12	21	154	7.57e-05	7.15e-05	0.79905	2R_11503655_SNP	C	SiteClass[FBgn0260429|CG42524|INTRON|0],TranscriptAnnot[INTRON(MODIFIER||||85|CG42524|protein_coding|CODING|FBtr0300853|1|1);INTRON(MODIFIER||||85|CG42524|protein_coding|CODING|FBtr0304712|1|1);INTRON(MODIFIER||||85|CG42524|protein_coding|CODING|FBtr0340006|1|1)]	-
FBtr0304712	2R_11503655_SNP	A	C	0.12	21	154	7.57e-05	7.15e-05	0.79905	2R_11503655_SNP	C	SiteClass[FBgn0260429|CG42524|INTRON|0],TranscriptAnnot[INTRON(MODIFIER||||85|CG42524|protein_coding|CODING|FBtr0300853|1|1);INTRON(MODIFIER||||85|CG42524|protein_coding|CODING|FBtr0304712|1|1);INTRON(MODIFIER||||85|CG42524|protein_coding|CODING|FBtr0340006|1|1)]	-
FBtr0340006	2R_11503655_SNP	A	C	0.12	21	154	7.57e-05	7.15e-05	0.79905	2R_11503655_SNP	C	SiteClass[FBgn0260429|CG42524|INTRON|0],TranscriptAnnot[INTRON(MODIFIER||||85|CG42524|protein_coding|CODING|FBtr0300853|1|1);INTRON(MODIFIER||||85|CG42524|protein_coding|CODING|FBtr0304712|1|1);INTRON(MODIFIER||||85|CG42524|protein_coding|CODING|FBtr0340006|1|1)]	-
FBgn0011818	2L_2495968_SNP	T	C	0.3018	51	118	0.0001013	7.32e-05	0.79905	2L_2495968_SNP	C	SiteClass[FBgn0011818|oaf|INTRON|0],TranscriptAnnot[INTRON(MODIFIER||||332|oaf|protein_coding|CODING|FBtr0077777|3|1);INTRON(MODIFIER||||332|oaf|protein_coding|CODING|FBtr0077778|3|1);INTRON(MODIFIER||||332|oaf|protein_coding|CODING|FBtr0077779|3|1);INTRON(MODIFIER||||487|oaf|protein_coding|CODING|FBtr0077780|3|1)]	-	FBgn0011818	The gene out at first is referred to in FlyBase by the symbol Dmel\oaf (CG9884, FBgn0011818). It is a protein_coding_gene from Drosophila melanogaster. It has 4 annotated transcripts and 4 polypeptides (2 unique). Gene sequence location is 2L:2492955..2498846. It has the cytological map location 22F4. Protein features are: Out at first protein. Its molecular function is unknown. It is involved in…
FBtr0077777	2L_2495968_SNP	T	C	0.3018	51	118	0.0001013	7.32e-05	0.79905	2L_2495968_SNP	C	SiteClass[FBgn0011818|oaf|INTRON|0],TranscriptAnnot[INTRON(MODIFIER||||332|oaf|protein_coding|CODING|FBtr0077777|3|1);INTRON(MODIFIER||||332|oaf|protein_coding|CODING|FBtr0077778|3|1);INTRON(MODIFIER||||332|oaf|protein_coding|CODING|FBtr0077779|3|1);INTRON(MODIFIER||||487|oaf|protein_coding|CODING|FBtr0077780|3|1)]	-
FBtr0077778	2L_2495968_SNP	T	C	0.3018	51	118	0.0001013	7.32e-05	0.79905	2L_2495968_SNP	C	SiteClass[FBgn0011818|oaf|INTRON|0],TranscriptAnnot[INTRON(MODIFIER||||332|oaf|protein_coding|CODING|FBtr0077777|3|1);INTRON(MODIFIER||||332|oaf|protein_coding|CODING|FBtr0077778|3|1);INTRON(MODIFIER||||332|oaf|protein_coding|CODING|FBtr0077779|3|1);INTRON(MODIFIER||||487|oaf|protein_coding|CODING|FBtr0077780|3|1)]	-
FBtr0077779	2L_2495968_SNP	T	C	0.3018	51	118	0.0001013	7.32e-05	0.79905	2L_2495968_SNP	C	SiteClass[FBgn0011818|oaf|INTRON|0],TranscriptAnnot[INTRON(MODIFIER||||332|oaf|protein_coding|CODING|FBtr0077777|3|1);INTRON(MODIFIER||||332|oaf|protein_coding|CODING|FBtr0077778|3|1);INTRON(MODIFIER||||332|oaf|protein_coding|CODING|FBtr0077779|3|1);INTRON(MODIFIER||||487|oaf|protein_coding|CODING|FBtr0077780|3|1)]	-
FBtr0077780	2L_2495968_SNP	T	C	0.3018	51	118	0.0001013	7.32e-05	0.79905	2L_2495968_SNP	C	SiteClass[FBgn0011818|oaf|INTRON|0],TranscriptAnnot[INTRON(MODIFIER||||332|oaf|protein_coding|CODING|FBtr0077777|3|1);INTRON(MODIFIER||||332|oaf|protein_coding|CODING|FBtr0077778|3|1);INTRON(MODIFIER||||332|oaf|protein_coding|CODING|FBtr0077779|3|1);INTRON(MODIFIER||||487|oaf|protein_coding|CODING|FBtr0077780|3|1)]	-
FBgn0035041	2R_20511974_SNP	T	A	0.2197	38	135	7.94e-05	7.37e-05	0.79905	2R_20511974_SNP	A	SiteClass[FBgn0035041|CG13594|INTRON|0],TranscriptAnnot[INTRON(MODIFIER||||478|CG13594|protein_coding|CODING|FBtr0072336|4|1);INTRON(MODIFIER||||478|CG13594|protein_coding|CODING|FBtr0343492|4|1)]	(TF_binding_site|mE1_TFBS_cad|FBsf0000247469)	FBgn0035041	This gene is referred to in FlyBase by the symbol Dmel\CG13594 (FBgn0035041). It is a protein_coding_gene from Drosophila melanogaster. It has 2 annotated transcripts and 2 polypeptides (1 unique). Gene sequence location is 2R:24615423..24638588. It has the cytological map location 60D9-60D10. Protein features are: Domain of unknown function DUF4802. Its molecular function is unknown. The biologi…
FBtr0072336	2R_20511974_SNP	T	A	0.2197	38	135	7.94e-05	7.37e-05	0.79905	2R_20511974_SNP	A	SiteClass[FBgn0035041|CG13594|INTRON|0],TranscriptAnnot[INTRON(MODIFIER||||478|CG13594|protein_coding|CODING|FBtr0072336|4|1);INTRON(MODIFIER||||478|CG13594|protein_coding|CODING|FBtr0343492|4|1)]	(TF_binding_site|mE1_TFBS_cad|FBsf0000247469)
FBtr0343492	2R_20511974_SNP	T	A	0.2197	38	135	7.94e-05	7.37e-05	0.79905	2R_20511974_SNP	A	SiteClass[FBgn0035041|CG13594|INTRON|0],TranscriptAnnot[INTRON(MODIFIER||||478|CG13594|protein_coding|CODING|FBtr0072336|4|1);INTRON(MODIFIER||||478|CG13594|protein_coding|CODING|FBtr0343492|4|1)]	(TF_binding_site|mE1_TFBS_cad|FBsf0000247469)
FBgn0050393	2R_17154790_SNP	A	G	0.4943	86	88	7.28e-05	7.38e-05	0.79905	2R_17154790_SNP	A	SiteClass[FBgn0050393|CG30393|SYNONYMOUS_CODING|0;FBgn0085426|Rgk3|INTRON|0;FBgn0050391|CG30391|UPSTREAM|943],TranscriptAnnot[SYNONYMOUS_CODING(LOW|SILENT|aaT/aaC|N77|354|CG30393|protein_coding|CODING|FBtr0071620|1|1);UPSTREAM(MODIFIER||943||338|CG30391|protein_coding|CODING|FBtr0071621||1);INTRON(MODIFIER||||421|Rgk3|protein_coding|CODING|FBtr0305983|2|1);INTRON(MODIFIER||||449|Rgk3|protein_codi…	(TF_binding_site|mE1_TFBS_chinmo|FBsf0000211703);(TF_binding_site|mE1_TFBS_HSA|FBsf0000359009)	FBgn0050393	This	gene	is	referred	to	in	FlyBase	by	the	symbol	Dmel\CG30393	(FBgn0050393).	It	is	a	protein_coding_gene	from	Drosophila	melanogaster.	It	has	one	annotated	transcript	and	one	polypeptide.	Gene	sequence	location	is	2R:21266364..21267579.	It	has	the
FBgn0085426	2R_17154790_SNP	A	G	0.4943	86	88	7.28e-05	7.38e-05	0.79905	2R_17154790_SNP	A	SiteClass[FBgn0050393|CG30393|SYNONYMOUS_CODING|0;FBgn0085426|Rgk3|INTRON|0;FBgn0050391|CG30391|UPSTREAM|943],TranscriptAnnot[SYNONYMOUS_CODING(LOW|SILENT|aaT/aaC|N77|354|CG30393|protein_coding|CODING|FBtr0071620|1|1);UPSTREAM(MODIFIER||943||338|CG30391|protein_coding|CODING|FBtr0071621||1);INTRON(MODIFIER||||421|Rgk3|protein_coding|CODING|FBtr0305983|2|1);INTRON(MODIFIER||||449|Rgk3|protein_codi…	(TF_binding_site|mE1_TFBS_chinmo|FBsf0000211703);(TF_binding_site|mE1_TFBS_HSA|FBsf0000359009)	FBgn0085426	The gene Rad, Gem/Kir family member 3 is referred to in FlyBase by the symbol Dmel\Rgk3 (CG34397, FBgn0085426). It is a protein_coding_gene from Drosophila melanogaster. It has 4 annotated transcripts and 4 polypeptides (2 unique). Gene sequence location is 2R:21255165..21280995. It has the cytological map location 57D4-57D5. Protein features are: P-loop containing nucleoside triphosphate hydrola…
FBgn0050391	2R_17154790_SNP	A	G	0.4943	86	88	7.28e-05	7.38e-05	0.79905	2R_17154790_SNP	A	SiteClass[FBgn0050393|CG30393|SYNONYMOUS_CODING|0;FBgn0085426|Rgk3|INTRON|0;FBgn0050391|CG30391|UPSTREAM|943],TranscriptAnnot[SYNONYMOUS_CODING(LOW|SILENT|aaT/aaC|N77|354|CG30393|protein_coding|CODING|FBtr0071620|1|1);UPSTREAM(MODIFIER||943||338|CG30391|protein_coding|CODING|FBtr0071621||1);INTRON(MODIFIER||||421|Rgk3|protein_coding|CODING|FBtr0305983|2|1);INTRON(MODIFIER||||449|Rgk3|protein_codi…	(TF_binding_site|mE1_TFBS_chinmo|FBsf0000211703);(TF_binding_site|mE1_TFBS_HSA|FBsf0000359009)	FBgn0050391	This	gene	is	referred	to	in	FlyBase	by	the	symbol	Dmel\CG30391	(FBgn0050391).	It	is	a	protein_coding_gene	from	Drosophila	melanogaster.	It	has	one	annotated	transcript	and	one	polypeptide.	Gene	sequence	location	is	2R:21264805..21266342.	It	has	the
FBtr0071620	2R_17154790_SNP	A	G	0.4943	86	88	7.28e-05	7.38e-05	0.79905	2R_17154790_SNP	A	SiteClass[FBgn0050393|CG30393|SYNONYMOUS_CODING|0;FBgn0085426|Rgk3|INTRON|0;FBgn0050391|CG30391|UPSTREAM|943],TranscriptAnnot[SYNONYMOUS_CODING(LOW|SILENT|aaT/aaC|N77|354|CG30393|protein_coding|CODING|FBtr0071620|1|1);UPSTREAM(MODIFIER||943||338|CG30391|protein_coding|CODING|FBtr0071621||1);INTRON(MODIFIER||||421|Rgk3|protein_coding|CODING|FBtr0305983|2|1);INTRON(MODIFIER||||449|Rgk3|protein_codi…	(TF_binding_site|mE1_TFBS_chinmo|FBsf0000211703);(TF_binding_site|mE1_TFBS_HSA|FBsf0000359009)
FBtr0071621	2R_17154790_SNP	A	G	0.4943	86	88	7.28e-05	7.38e-05	0.79905	2R_17154790_SNP	A	SiteClass[FBgn0050393|CG30393|SYNONYMOUS_CODING|0;FBgn0085426|Rgk3|INTRON|0;FBgn0050391|CG30391|UPSTREAM|943],TranscriptAnnot[SYNONYMOUS_CODING(LOW|SILENT|aaT/aaC|N77|354|CG30393|protein_coding|CODING|FBtr0071620|1|1);UPSTREAM(MODIFIER||943||338|CG30391|protein_coding|CODING|FBtr0071621||1);INTRON(MODIFIER||||421|Rgk3|protein_coding|CODING|FBtr0305983|2|1);INTRON(MODIFIER||||449|Rgk3|protein_codi…	(TF_binding_site|mE1_TFBS_chinmo|FBsf0000211703);(TF_binding_site|mE1_TFBS_HSA|FBsf0000359009)
FBtr0305983	2R_17154790_SNP	A	G	0.4943	86	88	7.28e-05	7.38e-05	0.79905	2R_17154790_SNP	A	SiteClass[FBgn0050393|CG30393|SYNONYMOUS_CODING|0;FBgn0085426|Rgk3|INTRON|0;FBgn0050391|CG30391|UPSTREAM|943],TranscriptAnnot[SYNONYMOUS_CODING(LOW|SILENT|aaT/aaC|N77|354|CG30393|protein_coding|CODING|FBtr0071620|1|1);UPSTREAM(MODIFIER||943||338|CG30391|protein_coding|CODING|FBtr0071621||1);INTRON(MODIFIER||||421|Rgk3|protein_coding|CODING|FBtr0305983|2|1);INTRON(MODIFIER||||449|Rgk3|protein_codi…	(TF_binding_site|mE1_TFBS_chinmo|FBsf0000211703);(TF_binding_site|mE1_TFBS_HSA|FBsf0000359009)
FBtr0112646	2R_17154790_SNP	A	G	0.4943	86	88	7.28e-05	7.38e-05	0.79905	2R_17154790_SNP	A	SiteClass[FBgn0050393|CG30393|SYNONYMOUS_CODING|0;FBgn0085426|Rgk3|INTRON|0;FBgn0050391|CG30391|UPSTREAM|943],TranscriptAnnot[SYNONYMOUS_CODING(LOW|SILENT|aaT/aaC|N77|354|CG30393|protein_coding|CODING|FBtr0071620|1|1);UPSTREAM(MODIFIER||943||338|CG30391|protein_coding|CODING|FBtr0071621||1);INTRON(MODIFIER||||421|Rgk3|protein_coding|CODING|FBtr0305983|2|1);INTRON(MODIFIER||||449|Rgk3|protein_codi…	(TF_binding_site|mE1_TFBS_chinmo|FBsf0000211703);(TF_binding_site|mE1_TFBS_HSA|FBsf0000359009)
FBtr0342882	2R_17154790_SNP	A	G	0.4943	86	88	7.28e-05	7.38e-05	0.79905	2R_17154790_SNP	A	SiteClass[FBgn0050393|CG30393|SYNONYMOUS_CODING|0;FBgn0085426|Rgk3|INTRON|0;FBgn0050391|CG30391|UPSTREAM|943],TranscriptAnnot[SYNONYMOUS_CODING(LOW|SILENT|aaT/aaC|N77|354|CG30393|protein_coding|CODING|FBtr0071620|1|1);UPSTREAM(MODIFIER||943||338|CG30391|protein_coding|CODING|FBtr0071621||1);INTRON(MODIFIER||||421|Rgk3|protein_coding|CODING|FBtr0305983|2|1);INTRON(MODIFIER||||449|Rgk3|protein_codi…	(TF_binding_site|mE1_TFBS_chinmo|FBsf0000211703);(TF_binding_site|mE1_TFBS_HSA|FBsf0000359009)
FBtr0342883	2R_17154790_SNP	A	G	0.4943	86	88	7.28e-05	7.38e-05	0.79905	2R_17154790_SNP	A	SiteClass[FBgn0050393|CG30393|SYNONYMOUS_CODING|0;FBgn0085426|Rgk3|INTRON|0;FBgn0050391|CG30391|UPSTREAM|943],TranscriptAnnot[SYNONYMOUS_CODING(LOW|SILENT|aaT/aaC|N77|354|CG30393|protein_coding|CODING|FBtr0071620|1|1);UPSTREAM(MODIFIER||943||338|CG30391|protein_coding|CODING|FBtr0071621||1);INTRON(MODIFIER||||421|Rgk3|protein_coding|CODING|FBtr0305983|2|1);INTRON(MODIFIER||||449|Rgk3|protein_codi…	(TF_binding_site|mE1_TFBS_chinmo|FBsf0000211703);(TF_binding_site|mE1_TFBS_HSA|FBsf0000359009)
FBgn0002524	2L_15502855_SNP	T	C	0.253	42	124	7.65e-05	7.43e-05	0.79905	2L_15502855_SNP	C	SiteClass[FBgn0002524|lace|SYNONYMOUS_CODING|0],TranscriptAnnot[SYNONYMOUS_CODING(LOW|SILENT|Ctg/Ttg|L315|597|lace|protein_coding|CODING|FBtr0343735|2|1);SYNONYMOUS_CODING(LOW|SILENT|Ctg/Ttg|L315|597|lace|protein_coding|CODING|FBtr0080738|2|1)]	(TF_binding_site|mE1_TFBS_HSA|FBsf0000351408)	FBgn0002524	The gene lace is referred to in FlyBase by the symbol Dmel\lace (CG4162, FBgn0002524). It is a protein_coding_gene from Drosophila melanogaster. It has 2 annotated transcripts and 2 polypeptides (1 unique). Gene sequence location is 2L:15499127..15505018. It has the cytological map location 35D2. Protein features are: Aminotransferase, class I/classII; Aminotransferase, class-II, pyridoxal-phosph…
FBtr0343735	2L_15502855_SNP	T	C	0.253	42	124	7.65e-05	7.43e-05	0.79905	2L_15502855_SNP	C	SiteClass[FBgn0002524|lace|SYNONYMOUS_CODING|0],TranscriptAnnot[SYNONYMOUS_CODING(LOW|SILENT|Ctg/Ttg|L315|597|lace|protein_coding|CODING|FBtr0343735|2|1);SYNONYMOUS_CODING(LOW|SILENT|Ctg/Ttg|L315|597|lace|protein_coding|CODING|FBtr0080738|2|1)]	(TF_binding_site|mE1_TFBS_HSA|FBsf0000351408)
FBtr0080738	2L_15502855_SNP	T	C	0.253	42	124	7.65e-05	7.43e-05	0.79905	2L_15502855_SNP	C	SiteClass[FBgn0002524|lace|SYNONYMOUS_CODING|0],TranscriptAnnot[SYNONYMOUS_CODING(LOW|SILENT|Ctg/Ttg|L315|597|lace|protein_coding|CODING|FBtr0343735|2|1);SYNONYMOUS_CODING(LOW|SILENT|Ctg/Ttg|L315|597|lace|protein_coding|CODING|FBtr0080738|2|1)]	(TF_binding_site|mE1_TFBS_HSA|FBsf0000351408)
FBgn0259162	X_20430305_SNP	A	T	0.2273	35	119	9.54e-05	7.44e-05	0.79905	X_20430305_SNP	T	SiteClass[FBgn0259162|RunxB|INTRON|0],TranscriptAnnot[INTRON(MODIFIER||||663|RunxB|protein_coding|CODING|FBtr0332385|4|1)]	-	FBgn0259162	This gene is referred to in FlyBase by the symbol Dmel\RunxB (CG42267, FBgn0259162). It is a protein_coding_gene from Drosophila melanogaster. It has one annotated transcript and one polypeptide. Gene sequence location is X:20538497..20567097. It has the cytological map location 19D3. Protein features are: Acute myeloid leukemia 1 protein (AML1)/Runt; Runt domain; p53-like transcription factor, D…
FBtr0332385	X_20430305_SNP	A	T	0.2273	35	119	9.54e-05	7.44e-05	0.79905	X_20430305_SNP	T	SiteClass[FBgn0259162|RunxB|INTRON|0],TranscriptAnnot[INTRON(MODIFIER||||663|RunxB|protein_coding|CODING|FBtr0332385|4|1)]	-
FBgn0034731	2R_18342893_SNP	A	C	0.1156	20	153	9.71e-05	7.49e-05	0.79905	2R_18342893_SNP	C	SiteClass[FBgn0034731|CG10384|UTR_5_PRIME|0],TranscriptAnnot[UTR_5_PRIME(MODIFIER||4704||492|CG10384|protein_coding|CODING|FBtr0342992|1|1);UTR_5_PRIME(MODIFIER||4704||492|CG10384|protein_coding|CODING|FBtr0342991|1|1)]	-	FBgn0034731	This gene is referred to in FlyBase by the symbol Dmel\CG10384 (FBgn0034731). It is a protein_coding_gene from Drosophila melanogaster. It has 2 annotated transcripts and 2 polypeptides (1 unique). Gene sequence location is 2R:22454741..22472995. It has the cytological map location 58E2-58E3. Protein features are: K Homology domain; K Homology domain, type 1. Its molecular function is described b…
FBtr0342992	2R_18342893_SNP	A	C	0.1156	20	153	9.71e-05	7.49e-05	0.79905	2R_18342893_SNP	C	SiteClass[FBgn0034731|CG10384|UTR_5_PRIME|0],TranscriptAnnot[UTR_5_PRIME(MODIFIER||4704||492|CG10384|protein_coding|CODING|FBtr0342992|1|1);UTR_5_PRIME(MODIFIER||4704||492|CG10384|protein_coding|CODING|FBtr0342991|1|1)]	-
FBtr0342991	2R_18342893_SNP	A	C	0.1156	20	153	9.71e-05	7.49e-05	0.79905	2R_18342893_SNP	C	SiteClass[FBgn0034731|CG10384|UTR_5_PRIME|0],TranscriptAnnot[UTR_5_PRIME(MODIFIER||4704||492|CG10384|protein_coding|CODING|FBtr0342992|1|1);UTR_5_PRIME(MODIFIER||4704||492|CG10384|protein_coding|CODING|FBtr0342991|1|1)]	-
FBgn0052082	3L_11137048_SNP	G	T	0.1607	27	141	8.92e-05	7.5e-05	0.79905	3L_11137048_SNP	T	SiteClass[FBgn0052082|CG32082|INTRON|0],TranscriptAnnot[INTRON(MODIFIER||||1076|CG32082|protein_coding|CODING|FBtr0076216|1|1);INTRON(MODIFIER||||630|CG32082|protein_coding|CODING|FBtr0113422|1|1);INTRON(MODIFIER||||629|CG32082|protein_coding|CODING|FBtr0334096|1|1);INTRON(MODIFIER||||646|CG32082|protein_coding|CODING|FBtr0344833|1|1)]	-	FBgn0052082	This gene is referred to in FlyBase by the symbol Dmel\CG32082 (FBgn0052082). It is a protein_coding_gene from Drosophila melanogaster. It has 4 annotated transcripts and 4 polypeptides (all unique). Gene sequence location is 3L:11136049..11163984. It has the cytological map location 68A8-68A9. Protein features are: I-BAR domain containing protein IRSp53/IRTKS/Pinkbar; IMD/I-BAR domain; SH3 domai…
FBtr0076216	3L_11137048_SNP	G	T	0.1607	27	141	8.92e-05	7.5e-05	0.79905	3L_11137048_SNP	T	SiteClass[FBgn0052082|CG32082|INTRON|0],TranscriptAnnot[INTRON(MODIFIER||||1076|CG32082|protein_coding|CODING|FBtr0076216|1|1);INTRON(MODIFIER||||630|CG32082|protein_coding|CODING|FBtr0113422|1|1);INTRON(MODIFIER||||629|CG32082|protein_coding|CODING|FBtr0334096|1|1);INTRON(MODIFIER||||646|CG32082|protein_coding|CODING|FBtr0344833|1|1)]	-
FBtr0113422	3L_11137048_SNP	G	T	0.1607	27	141	8.92e-05	7.5e-05	0.79905	3L_11137048_SNP	T	SiteClass[FBgn0052082|CG32082|INTRON|0],TranscriptAnnot[INTRON(MODIFIER||||1076|CG32082|protein_coding|CODING|FBtr0076216|1|1);INTRON(MODIFIER||||630|CG32082|protein_coding|CODING|FBtr0113422|1|1);INTRON(MODIFIER||||629|CG32082|protein_coding|CODING|FBtr0334096|1|1);INTRON(MODIFIER||||646|CG32082|protein_coding|CODING|FBtr0344833|1|1)]	-
FBtr0334096	3L_11137048_SNP	G	T	0.1607	27	141	8.92e-05	7.5e-05	0.79905	3L_11137048_SNP	T	SiteClass[FBgn0052082|CG32082|INTRON|0],TranscriptAnnot[INTRON(MODIFIER||||1076|CG32082|protein_coding|CODING|FBtr0076216|1|1);INTRON(MODIFIER||||630|CG32082|protein_coding|CODING|FBtr0113422|1|1);INTRON(MODIFIER||||629|CG32082|protein_coding|CODING|FBtr0334096|1|1);INTRON(MODIFIER||||646|CG32082|protein_coding|CODING|FBtr0344833|1|1)]	-
FBtr0344833	3L_11137048_SNP	G	T	0.1607	27	141	8.92e-05	7.5e-05	0.79905	3L_11137048_SNP	T	SiteClass[FBgn0052082|CG32082|INTRON|0],TranscriptAnnot[INTRON(MODIFIER||||1076|CG32082|protein_coding|CODING|FBtr0076216|1|1);INTRON(MODIFIER||||630|CG32082|protein_coding|CODING|FBtr0113422|1|1);INTRON(MODIFIER||||629|CG32082|protein_coding|CODING|FBtr0334096|1|1);INTRON(MODIFIER||||646|CG32082|protein_coding|CODING|FBtr0344833|1|1)]	-
FBgn0050418	2R_20134511_SNP	C	T	0.2134	35	129	0.000117	7.6e-05	0.79905	2R_20134511_SNP	T	SiteClass[FBgn0050418|nord|INTRON|0],TranscriptAnnot[INTRON(MODIFIER||||587|nord|protein_coding|CODING|FBtr0072263|2|1)]	-	FBgn0050418	The gene nord is referred to in FlyBase by the symbol Dmel\nord (CG30418, FBgn0050418). It is a protein_coding_gene from Drosophila melanogaster. It has one annotated transcript and one polypeptide. Gene sequence location is 2R:24243255..24255094. It has the cytological map location 60C3-60C4. Protein features are: Fibronectin type III; Protein of unknown function DUF2369. Its molecular function …
FBtr0072263	2R_20134511_SNP	C	T	0.2134	35	129	0.000117	7.6e-05	0.79905	2R_20134511_SNP	T	SiteClass[FBgn0050418|nord|INTRON|0],TranscriptAnnot[INTRON(MODIFIER||||587|nord|protein_coding|CODING|FBtr0072263|2|1)]	-
FBgn0011274	2L_17416459_SNP	A	G	0.3789	61	100	4.2e-05	7.63e-05	0.79905	2L_17416459_SNP	A	SiteClass[FBgn0011274|Dif|INTRON|0],TranscriptAnnot[SYNONYMOUS_CODING(LOW|SILENT|ccT/ccC|P730|987|Dif|protein_coding|CODING|FBtr0301577|5|1);INTRON(MODIFIER||||667|Dif|protein_coding|CODING|FBtr0081008|5|1);INTRON(MODIFIER||||667|Dif|protein_coding|CODING|FBtr0081009|5|1);INTRON(MODIFIER||||667|Dif|protein_coding|CODING|FBtr0301578|5|1)]	-	FBgn0011274	The gene Dorsal-related immunity factor is referred to in FlyBase by the symbol Dmel\Dif (CG6794, FBgn0011274). It is a protein_coding_gene from Drosophila melanogaster. It has 4 annotated transcripts and 4 polypeptides (2 unique). Gene sequence location is 2L:17413248..17433161. It has the cytological map location 36C7-36C8. Protein features are: Dorsal-related immunity factor Dif; IPT domain; I…
FBtr0301577	2L_17416459_SNP	A	G	0.3789	61	100	4.2e-05	7.63e-05	0.79905	2L_17416459_SNP	A	SiteClass[FBgn0011274|Dif|INTRON|0],TranscriptAnnot[SYNONYMOUS_CODING(LOW|SILENT|ccT/ccC|P730|987|Dif|protein_coding|CODING|FBtr0301577|5|1);INTRON(MODIFIER||||667|Dif|protein_coding|CODING|FBtr0081008|5|1);INTRON(MODIFIER||||667|Dif|protein_coding|CODING|FBtr0081009|5|1);INTRON(MODIFIER||||667|Dif|protein_coding|CODING|FBtr0301578|5|1)]	-
FBtr0081008	2L_17416459_SNP	A	G	0.3789	61	100	4.2e-05	7.63e-05	0.79905	2L_17416459_SNP	A	SiteClass[FBgn0011274|Dif|INTRON|0],TranscriptAnnot[SYNONYMOUS_CODING(LOW|SILENT|ccT/ccC|P730|987|Dif|protein_coding|CODING|FBtr0301577|5|1);INTRON(MODIFIER||||667|Dif|protein_coding|CODING|FBtr0081008|5|1);INTRON(MODIFIER||||667|Dif|protein_coding|CODING|FBtr0081009|5|1);INTRON(MODIFIER||||667|Dif|protein_coding|CODING|FBtr0301578|5|1)]	-
FBtr0081009	2L_17416459_SNP	A	G	0.3789	61	100	4.2e-05	7.63e-05	0.79905	2L_17416459_SNP	A	SiteClass[FBgn0011274|Dif|INTRON|0],TranscriptAnnot[SYNONYMOUS_CODING(LOW|SILENT|ccT/ccC|P730|987|Dif|protein_coding|CODING|FBtr0301577|5|1);INTRON(MODIFIER||||667|Dif|protein_coding|CODING|FBtr0081008|5|1);INTRON(MODIFIER||||667|Dif|protein_coding|CODING|FBtr0081009|5|1);INTRON(MODIFIER||||667|Dif|protein_coding|CODING|FBtr0301578|5|1)]	-
FBtr0301578	2L_17416459_SNP	A	G	0.3789	61	100	4.2e-05	7.63e-05	0.79905	2L_17416459_SNP	A	SiteClass[FBgn0011274|Dif|INTRON|0],TranscriptAnnot[SYNONYMOUS_CODING(LOW|SILENT|ccT/ccC|P730|987|Dif|protein_coding|CODING|FBtr0301577|5|1);INTRON(MODIFIER||||667|Dif|protein_coding|CODING|FBtr0081008|5|1);INTRON(MODIFIER||||667|Dif|protein_coding|CODING|FBtr0081009|5|1);INTRON(MODIFIER||||667|Dif|protein_coding|CODING|FBtr0301578|5|1)]	-
FBgn0032151	2L_9863706_DEL	CTC	C	0.2517	37	110	6.67e-05	7.68e-05	0.79905	2L_9863706_DEL	CTC	SiteClass[FBgn0032151|nAChRalpha6|INTRON|0],TranscriptAnnot[INTRON(MODIFIER||||523|nAChRalpha6|protein_coding|CODING|FBtr0079912|2|1);INTRON(MODIFIER||||509|nAChRalpha6|protein_coding|CODING|FBtr0079913|3|1);INTRON(MODIFIER||||494|nAChRalpha6|protein_coding|CODING|FBtr0079914|2|1);INTRON(MODIFIER||||494|nAChRalpha6|protein_coding|CODING|FBtr0079915|3|1);INTRON(MODIFIER||||494|nAChRalpha6|protein_…	(TF_binding_site|BDTNP1_TFBS_z|FBsf0000196139);(TF_binding_site|mE1_TFBS_HSA|FBsf0000347186)	FBgn0032151	The gene nicotinic Acetylcholine Receptor ??6 is referred to in FlyBase by the symbol Dmel\nAChR??6 (CG4128, FBgn0032151). It is a protein_coding_gene from Drosophila melanogaster. It has 7 annotated transcripts and 7 polypeptides (6 unique). Gene sequence location is 2L:9793317..9886250. It has the cytological map location 30D1-30E1. Protein features are: Neurotransmitter-gated ion-channel; Neur…
FBtr0079912	2L_9863706_DEL	CTC	C	0.2517	37	110	6.67e-05	7.68e-05	0.79905	2L_9863706_DEL	CTC	SiteClass[FBgn0032151|nAChRalpha6|INTRON|0],TranscriptAnnot[INTRON(MODIFIER||||523|nAChRalpha6|protein_coding|CODING|FBtr0079912|2|1);INTRON(MODIFIER||||509|nAChRalpha6|protein_coding|CODING|FBtr0079913|3|1);INTRON(MODIFIER||||494|nAChRalpha6|protein_coding|CODING|FBtr0079914|2|1);INTRON(MODIFIER||||494|nAChRalpha6|protein_coding|CODING|FBtr0079915|3|1);INTRON(MODIFIER||||494|nAChRalpha6|protein_…	(TF_binding_site|BDTNP1_TFBS_z|FBsf0000196139);(TF_binding_site|mE1_TFBS_HSA|FBsf0000347186)
FBtr0079913	2L_9863706_DEL	CTC	C	0.2517	37	110	6.67e-05	7.68e-05	0.79905	2L_9863706_DEL	CTC	SiteClass[FBgn0032151|nAChRalpha6|INTRON|0],TranscriptAnnot[INTRON(MODIFIER||||523|nAChRalpha6|protein_coding|CODING|FBtr0079912|2|1);INTRON(MODIFIER||||509|nAChRalpha6|protein_coding|CODING|FBtr0079913|3|1);INTRON(MODIFIER||||494|nAChRalpha6|protein_coding|CODING|FBtr0079914|2|1);INTRON(MODIFIER||||494|nAChRalpha6|protein_coding|CODING|FBtr0079915|3|1);INTRON(MODIFIER||||494|nAChRalpha6|protein_…	(TF_binding_site|BDTNP1_TFBS_z|FBsf0000196139);(TF_binding_site|mE1_TFBS_HSA|FBsf0000347186)
FBtr0079914	2L_9863706_DEL	CTC	C	0.2517	37	110	6.67e-05	7.68e-05	0.79905	2L_9863706_DEL	CTC	SiteClass[FBgn0032151|nAChRalpha6|INTRON|0],TranscriptAnnot[INTRON(MODIFIER||||523|nAChRalpha6|protein_coding|CODING|FBtr0079912|2|1);INTRON(MODIFIER||||509|nAChRalpha6|protein_coding|CODING|FBtr0079913|3|1);INTRON(MODIFIER||||494|nAChRalpha6|protein_coding|CODING|FBtr0079914|2|1);INTRON(MODIFIER||||494|nAChRalpha6|protein_coding|CODING|FBtr0079915|3|1);INTRON(MODIFIER||||494|nAChRalpha6|protein_…	(TF_binding_site|BDTNP1_TFBS_z|FBsf0000196139);(TF_binding_site|mE1_TFBS_HSA|FBsf0000347186)
FBtr0079915	2L_9863706_DEL	CTC	C	0.2517	37	110	6.67e-05	7.68e-05	0.79905	2L_9863706_DEL	CTC	SiteClass[FBgn0032151|nAChRalpha6|INTRON|0],TranscriptAnnot[INTRON(MODIFIER||||523|nAChRalpha6|protein_coding|CODING|FBtr0079912|2|1);INTRON(MODIFIER||||509|nAChRalpha6|protein_coding|CODING|FBtr0079913|3|1);INTRON(MODIFIER||||494|nAChRalpha6|protein_coding|CODING|FBtr0079914|2|1);INTRON(MODIFIER||||494|nAChRalpha6|protein_coding|CODING|FBtr0079915|3|1);INTRON(MODIFIER||||494|nAChRalpha6|protein_…	(TF_binding_site|BDTNP1_TFBS_z|FBsf0000196139);(TF_binding_site|mE1_TFBS_HSA|FBsf0000347186)
FBtr0079916	2L_9863706_DEL	CTC	C	0.2517	37	110	6.67e-05	7.68e-05	0.79905	2L_9863706_DEL	CTC	SiteClass[FBgn0032151|nAChRalpha6|INTRON|0],TranscriptAnnot[INTRON(MODIFIER||||523|nAChRalpha6|protein_coding|CODING|FBtr0079912|2|1);INTRON(MODIFIER||||509|nAChRalpha6|protein_coding|CODING|FBtr0079913|3|1);INTRON(MODIFIER||||494|nAChRalpha6|protein_coding|CODING|FBtr0079914|2|1);INTRON(MODIFIER||||494|nAChRalpha6|protein_coding|CODING|FBtr0079915|3|1);INTRON(MODIFIER||||494|nAChRalpha6|protein_…	(TF_binding_site|BDTNP1_TFBS_z|FBsf0000196139);(TF_binding_site|mE1_TFBS_HSA|FBsf0000347186)
FBtr0303898	2L_9863706_DEL	CTC	C	0.2517	37	110	6.67e-05	7.68e-05	0.79905	2L_9863706_DEL	CTC	SiteClass[FBgn0032151|nAChRalpha6|INTRON|0],TranscriptAnnot[INTRON(MODIFIER||||523|nAChRalpha6|protein_coding|CODING|FBtr0079912|2|1);INTRON(MODIFIER||||509|nAChRalpha6|protein_coding|CODING|FBtr0079913|3|1);INTRON(MODIFIER||||494|nAChRalpha6|protein_coding|CODING|FBtr0079914|2|1);INTRON(MODIFIER||||494|nAChRalpha6|protein_coding|CODING|FBtr0079915|3|1);INTRON(MODIFIER||||494|nAChRalpha6|protein_…	(TF_binding_site|BDTNP1_TFBS_z|FBsf0000196139);(TF_binding_site|mE1_TFBS_HSA|FBsf0000347186)
FBtr0331284	2L_9863706_DEL	CTC	C	0.2517	37	110	6.67e-05	7.68e-05	0.79905	2L_9863706_DEL	CTC	SiteClass[FBgn0032151|nAChRalpha6|INTRON|0],TranscriptAnnot[INTRON(MODIFIER||||523|nAChRalpha6|protein_coding|CODING|FBtr0079912|2|1);INTRON(MODIFIER||||509|nAChRalpha6|protein_coding|CODING|FBtr0079913|3|1);INTRON(MODIFIER||||494|nAChRalpha6|protein_coding|CODING|FBtr0079914|2|1);INTRON(MODIFIER||||494|nAChRalpha6|protein_coding|CODING|FBtr0079915|3|1);INTRON(MODIFIER||||494|nAChRalpha6|protein_…	(TF_binding_site|BDTNP1_TFBS_z|FBsf0000196139);(TF_binding_site|mE1_TFBS_HSA|FBsf0000347186)
FBgn0015376	2L_3708289_SNP	T	C	0.3727	60	101	7.76e-05	7.81e-05	0.79905	2L_3708289_SNP	C	SiteClass[FBgn0015376|cutlet|INTRON|0],TranscriptAnnot[INTRON(MODIFIER||||993|cutlet|protein_coding|CODING|FBtr0077541|9|1)]	(TF_binding_site|mE1_TFBS_cad|FBsf0000241270)	FBgn0015376	The gene cutlet is referred to in FlyBase by the symbol Dmel\cutlet (CG33122, FBgn0015376). It is a protein_coding_gene from Drosophila melanogaster. It has one annotated transcript and one polypeptide. Gene sequence location is 2L:3707230..3711748. It has the cytological map location 24C1. Protein features are: AAA+ ATPase domain; ATPase, AAA-type, core; P-loop containing nucleoside triphosphate…
FBtr0077541	2L_3708289_SNP	T	C	0.3727	60	101	7.76e-05	7.81e-05	0.79905	2L_3708289_SNP	C	SiteClass[FBgn0015376|cutlet|INTRON|0],TranscriptAnnot[INTRON(MODIFIER||||993|cutlet|protein_coding|CODING|FBtr0077541|9|1)]	(TF_binding_site|mE1_TFBS_cad|FBsf0000241270)
FBgn0264000	3L_9252457_SNP	A	C	0.2216	39	137	6.92e-05	7.83e-05	0.79905	3L_9252457_SNP	A	SiteClass[FBgn0264000|GluRIB|INTRON|0],TranscriptAnnot[INTRON(MODIFIER||||1095|GluRIB|protein_coding|CODING|FBtr0330340|5|1);INTRON(MODIFIER||||1182|GluRIB|protein_coding|CODING|FBtr0330341|5|1|WARNING_TRANSCRIPT_MULTIPLE_STOP_CODONS);INTRON(MODIFIER||||1095|GluRIB|protein_coding|CODING|FBtr0334765|5|1)]	(TF_binding_site|mE1_TFBS_HSA|FBsf0000363579);(TF_binding_site|mE1_TFBS_sbb|FBsf0000250214)	FBgn0264000	The gene Glutamate receptor IB is referred to in FlyBase by the symbol Dmel\GluRIB (CG43743, FBgn0264000). It is a protein_coding_gene from Drosophila melanogaster. It has 4 annotated transcripts and 4 polypeptides (3 unique). Gene sequence location is 3L:9251978..9288522. It has the cytological map location 67A4-67A6. Protein features are: Ionotropic glutamate receptor; Ionotropic glutamate rece…
FBtr0330340	3L_9252457_SNP	A	C	0.2216	39	137	6.92e-05	7.83e-05	0.79905	3L_9252457_SNP	A	SiteClass[FBgn0264000|GluRIB|INTRON|0],TranscriptAnnot[INTRON(MODIFIER||||1095|GluRIB|protein_coding|CODING|FBtr0330340|5|1);INTRON(MODIFIER||||1182|GluRIB|protein_coding|CODING|FBtr0330341|5|1|WARNING_TRANSCRIPT_MULTIPLE_STOP_CODONS);INTRON(MODIFIER||||1095|GluRIB|protein_coding|CODING|FBtr0334765|5|1)]	(TF_binding_site|mE1_TFBS_HSA|FBsf0000363579);(TF_binding_site|mE1_TFBS_sbb|FBsf0000250214)
FBtr0330341	3L_9252457_SNP	A	C	0.2216	39	137	6.92e-05	7.83e-05	0.79905	3L_9252457_SNP	A	SiteClass[FBgn0264000|GluRIB|INTRON|0],TranscriptAnnot[INTRON(MODIFIER||||1095|GluRIB|protein_coding|CODING|FBtr0330340|5|1);INTRON(MODIFIER||||1182|GluRIB|protein_coding|CODING|FBtr0330341|5|1|WARNING_TRANSCRIPT_MULTIPLE_STOP_CODONS);INTRON(MODIFIER||||1095|GluRIB|protein_coding|CODING|FBtr0334765|5|1)]	(TF_binding_site|mE1_TFBS_HSA|FBsf0000363579);(TF_binding_site|mE1_TFBS_sbb|FBsf0000250214)
FBtr0334765	3L_9252457_SNP	A	C	0.2216	39	137	6.92e-05	7.83e-05	0.79905	3L_9252457_SNP	A	SiteClass[FBgn0264000|GluRIB|INTRON|0],TranscriptAnnot[INTRON(MODIFIER||||1095|GluRIB|protein_coding|CODING|FBtr0330340|5|1);INTRON(MODIFIER||||1182|GluRIB|protein_coding|CODING|FBtr0330341|5|1|WARNING_TRANSCRIPT_MULTIPLE_STOP_CODONS);INTRON(MODIFIER||||1095|GluRIB|protein_coding|CODING|FBtr0334765|5|1)]	(TF_binding_site|mE1_TFBS_HSA|FBsf0000363579);(TF_binding_site|mE1_TFBS_sbb|FBsf0000250214)
FBgn0085369	2L_3663693_SNP	G	A	0.3455	57	108	0.0001079	7.84e-05	0.79905	2L_3663693_SNP	G	SiteClass[FBgn0085369|CG34340|INTRON|0],TranscriptAnnot[INTRON(MODIFIER||||587|CG34340|protein_coding|CODING|FBtr0302391|1|1);INTRON(MODIFIER||||587|CG34340|protein_coding|CODING|FBtr0339572|1|1)]	-	FBgn0085369	This gene is referred to in FlyBase by the symbol Dmel\CG34340 (FBgn0085369). It is a protein_coding_gene from Drosophila melanogaster. It has 2 annotated transcripts and 2 polypeptides (1 unique). Gene sequence location is 2L:3662745..3692114. It has the cytological map location 24A5-24B1. Protein features are: Homeobox domain; Homeobox, conserved site; Homeodomain-like; OAR domain. Its molecula…
[truncated: 7,753 more rows]
[truncated: 104 more columns]
