# Supplementary material for: α-amanitin resistance in Drosophila melanogaster: A genome-wide association approach
Source: PLoS One. 2017 Feb 27;12(2):e0173162. doi: 10.1371/journal.pone.0173162 (PMC5328632; doi:10.1371/journal.pone.0173162)
Supplement: S8 Table — Larval LC50 values and the publicly available RNA-seq data of untreated male and female adults were correlated. (XLSX) [file pone.0173162.s008.xlsx]

## Sheet: S5
Probe		Female (correlation coefficient)	Male (correlation coefficient)	t_Female	t_Male	p_value_Female (red can be considered as significant, p-value without correction)	FDR-BH-corrected p-value (female)	P_VALUE_Female_corrected (red ones are significant with corrected p-values < 0.05)	p_value Male (red can be considered as significant, p-values without correction)	p-value_corrected Male (red ones are significant)	FDR-BH-corrected_pvalue												Chromosome	Gene name	Gene ID																							Probe
1640757_at	pearson	0.787181	0.694584	7.55126	5.37562	7.53207e-09	7.60438e-05	7.60438e-05	7.31389e-06	0.0105487	0.0105487	1640757_at	1640757_at	FBgn0053462	39781	Flybase	CG30086-RA	CG30086-RA /FEA=BDGP /GEN=CG30086 /DB_XREF=CG30086 FBgn0050086 /SEG=chr2R:+10758425,10761639 /MAP=52C1-52C1 /LEN=1826 /DEF=(CG30086 gene symbol:CG30086 synonyms:(CG8215) FBgn0050086 )	CG30086-RA	---	---	April 2004 (BDGP v4.0)	chr2R:11582205-11585419 (+) // 100.0 //	CG33462	CG33462	---	full length	FBgn0053462	2768841	A1ZA42 /// B3DNG4	EC:3.4.21.4	---	NP_995844	NM_206122	FBgn0053462	---	---	---	---	---	0006508 // proteolysis // inferred from sequence or structural similarity /// 0006508 // proteolysis // non-traceable author statement /// 0006508 // proteolysis // inferred from electronic annotation	---	0003824 // catalytic activity // inferred from electronic annotation /// 0004252 // serine-type endopeptidase activity // inferred from electronic annotation /// 0016787 // hydrolase activity // inferred from electronic annotation	---	---	---	---	This probe set was annotated using the Matching Probes based pipeline to a Entrez Gene identifier using 1 transcripts. // false // Matching Probes // A	NM_206122(14)
1636213_at	pearson	0.749351	0.74794	6.69496	6.27383	9.49214e-08	0.000479163	0.000479163	5.64302e-07	0.00284859	0.00284859	1636213_at	1636213_at	---	39781	Flybase	RE73276	RE73276 /FEA=sim4 /SEG=chr2R:-10438569,10439424	RE73276	---	---	April 2004 (BDGP v4.0)	chr2R:11262349-11263204 (-) // 100.0 //	---	---	---	---	---	---	Q86NS2	---	---	---	---	---	---	---	---	---	---	---	---	---	---	---	---	---	This probe set was annotated using the Matching Probes based pipeline to a UniGene identifier using 1 transcripts. // false // Matching Probes // A	BT003757(14)
1634890_at	pearson	-0.740291	-0.525837	-6.51451	-3.44202	1.63151e-07	0.000549059	0.000549059	0.00167327	0.263959	0.263959	1634890_at	1634890_at	FBgn0086691	2008-11-29	Flybase	CG15261-RA	CG15261-RA /FEA=BDGP /SEG=chr2L:-15252310,15253113	CG15261-RA	---	---	April 2004 (BDGP v4.0)	chr2L:15274225-15275028 (-) // 100.0 //	UK114	UK114	---	full length	FBgn0086691	---	Q9V3W0	---	---	NP_609747	NM_135903	FBgn0086691	---	---	---	---	---	---	---	---	---	---	---	---	This probe set was annotated using the Matching Probes based pipeline to a Entrez Gene identifier using 2 transcripts. // false // Matching Probes // A	AY119558(14),NM_135903(14)
1625763_at	pearson	-0.715816	-0.669935	-6.06457	-5.02416	6.34855e-07	0.00160238	0.00160238	2.00408e-05	0.016861	0.016861	1625763_at	1625763_at	FBgn0031263	2008-11-29	Flybase	CG2789-RA	CG2789-RA /FEA=BDGP /GEN=CG2789 /DB_XREF=CG2789 FBgn0031263 /SEG=chr2L:+561275,562190 /MAP=21D1-21D1 /LEN=856 /DEF=(CG2789 gene symbol:CG2789 FBgn0031263 (GO:0008503 benzodiazepine receptor))	CG2789-RA	---	---	April 2004 (BDGP v4.0)	chr2L:559610-560525 (+) // 100.0 //	CG2789	CG2789	---	full length	FBgn0031263	33231	Q9VPR1	---	---	NP_608531	NM_134687	FBgn0031263	---	---	---	---	---	---	0005740 // mitochondrial envelope // inferred from sequence or structural similarity /// 0016021 // integral to membrane // inferred from electronic annotation	0008503 // benzodiazepine receptor activity // inferred from sequence or structural similarity	---	---	FBtr0078066 // span:9-31,51-73,86-105,115-132,139-161 // numtm:5 /// NP_608531.1 // span:9-31,51-73,86-105,115-132,139-161 // numtm:5 /// FBpp0077726 // span:9-31,51-73,86-105,115-132,139-161 // numtm:5	---	This probe set was annotated using the Matching Probes based pipeline to a Entrez Gene identifier using 1 transcripts. // false // Matching Probes // A	NM_134687(14)
1626530_at	pearson	0.681856	0.65167	5.51468	4.78356	3.37056e-06	0.00680583	0.00680583	3.99053e-05	0.0236991	0.0236991	1626530_at	1626530_at	FBgn0000278	39781	Flybase	CG1878-RA	CG1878-RA /FEA=BDGP /GEN=CecB /DB_XREF=CG1878 FBgn0000278 /SEG=chr3R:-26028563,26028813 /MAP=99E2-99E2 /LEN=192 /DEF=(CG1878 gene symbol:CecB FBgn0000278 (GO:0005576 extracellular) (GO:0003797 antibacterial peptide) (GO:0003799 antifungal peptide) (GO:0006961 antibacterial humoral response (sensu Invertebrata)) (GO:0008224 Gram-positive antibacterial peptide) (GO:0008225 Gram-negative antibacteri…	CG1878-RA	---	---	April 2004 (BDGP v4.0)	chr3R:26039197-26039447 (-) // 100.0 //	Cecropin B	CecB	---	full length	FBgn0000278	43598	P14956 /// Q6LAH5	---	---	NP_524590	NM_079851	FBgn0000278	---	---	---	---	---	0006955 // immune response // inferred from electronic annotation /// 0019731 // antibacterial humoral response // inferred from direct assay /// 0019731 // antibacterial humoral response // inferred from expression pattern /// 0019731 // antibacterial humoral response // inferred from sequence or structural similarity /// 0019731 // antibacterial humoral response // non-traceable author statemen…	0005576 // extracellular region // inferred from direct assay /// 0005576 // extracellular region // inferred from electronic annotation /// 0005615 // extracellular space // inferred from direct assay	---	---	---	FBtr0085640 // span:7-26 // numtm:1 /// NP_524590.1 // span:7-26 // numtm:1 /// FBpp0085002 // span:7-26 // numtm:1	---	This probe set was annotated using the Matching Probes based pipeline to a Entrez Gene identifier using 1 transcripts. // false // Matching Probes // A	NM_079851(14)
1636674_at	pearson	-0.656479	-0.577735	-5.14855	-3.94094	1.02365e-05	0.0103348	0.0172246	0.000430363	0.114341	0.114341	1636674_at	1636674_at	FBgn0038733	2008-11-29	Flybase	CG11407-RA	CG11407-RA /FEA=BDGP /GEN=CG11407 /DB_XREF=CG11407 FBgn0038733 /SEG=chr3R:+15606990,15608885 /MAP=92B2-92B2 /LEN=1784 /DEF=(CG11407 gene symbol:CG11407 FBgn0038733 (GO:0005324 long-chain fatty acid transporter))	CG11407-RA	---	---	April 2004 (BDGP v4.0)	chr3R:15606973-15608868 (+) // 100.0 //	CG11407	CG11407	---	full length	FBgn0038733	42354	Q9VDU1	---	---	NP_650831	NM_142574	FBgn0038733	---	---	---	---	---	0008152 // metabolic process // inferred from electronic annotation	---	0003824 // catalytic activity // inferred from electronic annotation /// 0005324 // long-chain fatty acid transporter activity // inferred from sequence or structural similarity /// 0005515 // protein binding // inferred from physical interaction	---	---	---	---	This probe set was annotated using the Matching Probes based pipeline to a Entrez Gene identifier using 2 transcripts. // false // Matching Probes // A	AY058430(14),NM_142574(14)
1628387_s_at	pearson	0.656421	0.669093	5.14776	5.01272	1.02612e-05	0.0115108	0.0147996	2.07089e-05	0.0149341	0.0149341	1628387_s_at	1628387_s_at	FBgn0050080	39781	Flybase	CT32157	CT32157 /FEA=sim4 /SEG=chr2R:-10762740,10762878	CT32157	---	---	April 2004 (BDGP v4.0)	chr2R:11586520-11586658 (-) // 100.0 //	CG30080	CG30080	---	full length	FBgn0050080	246441	Q8IGL0 /// Q8MKK8	---	---	NP_725491	NM_166115	FBgn0050080	---	---	---	---	---	0006355 // regulation of transcription, DNA-dependent // inferred from electronic annotation	---	0003700 // transcription factor activity // inferred from electronic annotation	---	---	FBtr0087319 // span:40-62,77-94 // numtm:2 /// NP_725491.1 // span:40-62,77-94 // numtm:2 /// AAM29474.1 // span:40-62,77-94 // numtm:2 /// GENSCAN00000017118 // span:10-27 // numtm:1 /// FBpp0086453 // span:40-62,77-94 // numtm:2	---	This probe set was annotated using the Matching Probes based pipeline to a Entrez Gene identifier using 2 transcripts. // false // Matching Probes // A	AY113469(14),NM_166115(14)
1628930_at	pearson	0.654574	-0.173325	5.12239	-0.979863	1.10804e-05	0.0159811	0.0139834	0.334739	0.958459	0.958459	1628930_at	1628930_at	FBgn0034262	39781	Flybase	CG14485-RA	CG14485-RA /FEA=BDGP /GEN=CG14485 /DB_XREF=CG14485 FBgn0034262 /SEG=chr2R:-12753998,12759076 /MAP=54D5-54D6 /LEN=2581 /DEF=(CG14485 gene symbol:CG14485 FBgn0034262 )	CG14485-RA	---	---	April 2004 (BDGP v4.0)	chr2R:13577778-13582856 (-) // 100.0 //	swi2	swi2	---	full length	FBgn0034262	37010	Q8SXT3	---	---	NP_611247	NM_137403	FBgn0034262	---	---	---	---	---	0007242 // intracellular signaling cascade // inferred from sequence or structural similarity /// 0035073 // pupariation // inferred from sequence or structural similarity /// 0035075 // response to ecdysone // inferred from sequence or structural similarity	---	0005515 // protein binding // inferred from electronic annotation	---	---	---	---	This probe set was annotated using the Matching Probes based pipeline to a Entrez Gene identifier using 2 transcripts. // false // Matching Probes // A	AY084149(14),NM_137403(14)
1631650_a_at	pearson	0.650459	0.598625	5.06643	4.1609	1.31244e-05	0.016563	0.0147227	0.000233123	0.0941445	0.0941445	1631650_a_at	1631650_a_at	FBgn0030051	39781	Flybase	CG2056-RB	CG2056-RB /FEA=BDGP /GEN=CG2056 /DB_XREF=CG2056 FBgn0030051 /SEG=chrX:-8310044,8312518 /MAP=7F5-7F5 /LEN=1558 /DEF=(CG2056 gene symbol:CG2056 FBgn0030051 (GO:0004252 serine-type endopeptidase))	CG2056-RB	---	---	April 2004 (BDGP v4.0)	chrX:8465131-8467605 (-) // 100.0 //	CG2056 /// CG2056	DsimCG2056 /// spirit	---	full length	FBgn0030051	31797	Q2UXN3 /// Q7K3Y1	EC:3.4.21.4	---	NP_572492 /// NP_727276	NM_132264 /// NM_167161	FBgn0030051 /// FBgn0085093	---	---	---	---	---	0006468 // protein amino acid phosphorylation // inferred from electronic annotation /// 0006508 // proteolysis // inferred from electronic annotation /// 0006508 // proteolysis // non-traceable author statement /// 0045087 // innate immune response // inferred from mutant phenotype /// 0050829 // defense response to Gram-negative bacterium // inferred from mutant phenotype /// 0050830 // defense…	---	0003824 // catalytic activity // inferred from electronic annotation /// 0004252 // serine-type endopeptidase activity // inferred from electronic annotation /// 0004672 // protein kinase activity // inferred from electronic annotation /// 0005524 // ATP binding // inferred from electronic annotation /// 0008233 // peptidase activity // inferred from electronic annotation /// 0016787 // hydrolase…	---	---	FBtr0071230 // span:13-35 // numtm:1 /// FBtr0071231 // span:13-35 // numtm:1 /// NP_727276.1 // span:13-35 // numtm:1 /// NP_572492.1 // span:13-35 // numtm:1 /// AAL13512.1 // span:13-35 // numtm:1 /// FBpp0071174 // span:13-35 // numtm:1 /// FBpp0071175 // span:13-35 // numtm:1	---	This probe set was annotated using the Matching Probes based pipeline to a Entrez Gene identifier using 3 transcripts. // false // Matching Probes // A	AY058283(14),NM_132264(14),NM_167161(14)
1627759_at	pearson	0.632656	0.634033	4.83301	4.565	2.6541e-05	0.0206121	0.0223298	7.44221e-05	0.0417425	0.0417425	1627759_at	1627759_at	FBgn0050080	39781	Flybase	CG30080-RA	CG30080-RA /FEA=BDGP /GEN=CG30080 /DB_XREF=CG30080 FBgn0050080 /SEG=chr2R:-10762443,10765419 /MAP=52C1-52C1 /LEN=2796 /DEF=(CG30080 gene symbol:CG30080 synonyms:(CG12965) FBgn0050080 )	CG30080-RA	---	---	April 2004 (BDGP v4.0)	chr2R:11586223-11589199 (-) // 100.0 //	CG30080	CG30080	---	full length	FBgn0050080	246441	Q8IGL0 /// Q8MKK8	---	---	NP_725491	NM_166115	FBgn0050080	---	---	---	---	---	0006355 // regulation of transcription, DNA-dependent // inferred from electronic annotation	---	0003700 // transcription factor activity // inferred from electronic annotation	---	---	FBtr0087319 // span:40-62,77-94 // numtm:2 /// NP_725491.1 // span:40-62,77-94 // numtm:2 /// AAM29474.1 // span:40-62,77-94 // numtm:2 /// FBpp0086453 // span:40-62,77-94 // numtm:2	---	This probe set was annotated using the Matching Probes based pipeline to a Entrez Gene identifier using 2 transcripts. // false // Matching Probes // A	AY113469(14),NM_166115(14)
1627324_at	pearson	0.636773	0.661743	4.8858	4.91433	2.26409e-05	0.0207802	0.0207802	2.74515e-05	0.0184767	0.0184767	1627324_at	1627324_at	FBgn0005630	39781	Flybase	CG12052-RH	CG12052-RH /FEA=BDGP /GEN=lola /DB_XREF=CG12052 FBgn0005630 /SEG=chr2R:-5562713,5595711 /MAP=47A11-47A13 /LEN=2065 /DEF=(CG12052 gene symbol:lola synonyms:(CG30014 CG18379 CG18378 CG18380 CG18381 CG18376 CG30013 CG30012) FBgn0005630 (GO:0003702 RNA polymerase II transcription factor) (GO:0003704 specific RNA polymerase II transcription factor) (GO:0007411 axon guidance) (GO:0005634 nucleus) (GO:0…	CG12052-RH	---	---	April 2004 (BDGP v4.0)	chr2R:6389585-6422583 (-) // 100.0 //	longitudinals absent	lola	chr2-	full length	FBgn0005630	44548	P42283 /// P42284 /// Q7JPL9 /// Q7KQZ4 /// Q867Z4 /// Q8IGF5 /// Q95S45 /// Q95TA6 /// Q9V5M3 /// Q9V5M6	---	---	NP_001027400 /// NP_524766 /// NP_724945 /// NP_724946 /// NP_724949 /// NP_724950 /// NP_724951 /// NP_724952 /// NP_724953 /// NP_788308 /// NP_788309 /// NP_788310 /// NP_788311 /// NP_788312 /// NP_788313 /// NP_788314 /// NP_788315 /// NP_788316 /// NP_788317 /// NP_788318 /// NP_788319 /// NP_788320 /// NP_995804 /// NP_995805 /// NP_995806 /// NP_995807	NM_001032229 /// NM_080027 /// NM_170617 /// NM_170618 /// NM_170619 /// NM_170620 /// NM_170621 /// NM_170622 /// NM_170623 /// NM_176128 /// NM_176129 /// NM_176130 /// NM_176131 /// NM_176132 /// NM_176133 /// NM_176134 /// NM_176135 /// NM_176136 /// NM_176137 /// NM_176138 /// NM_176139 /// NM_176140 /// NM_206082 /// NM_206083 /// NM_206084 /// NM_206085	FBgn0005630	---	---	---	---	---	0001539 // ciliary or flagellar motility // inferred from electronic annotation /// 0006350 // transcription // inferred from electronic annotation /// 0006355 // regulation of transcription, DNA-dependent // inferred from electronic annotation /// 0006357 // regulation of transcription from RNA polymerase II promoter // non-traceable author statement /// 0007275 // multicellular organismal devel…	0005622 // intracellular // inferred from electronic annotation /// 0005634 // nucleus // inferred from direct assay /// 0005634 // nucleus // non-traceable author statement /// 0005634 // nucleus // inferred from electronic annotation /// 0009288 // flagellin-based flagellum // inferred from electronic annotation	0003677 // DNA binding // inferred from electronic annotation /// 0003702 // RNA polymerase II transcription factor activity // non-traceable author statement /// 0003704 // specific RNA polymerase II transcription factor activity // inferred from sequence or structural similarity /// 0003704 // specific RNA polymerase II transcription factor activity // non-traceable author statement /// 0003774…	---	---	---	---	This probe set was annotated using the Matching Probes based pipeline to a Entrez Gene identifier using 5 transcripts. // false // Matching Probes // A	AB107284(14),AB107304(14),AB107324(14),AB107344(14),NM_170617(14)
1624846_at	pearson	0.628354	0.0204537	4.77858	0.113905	3.12591e-05	0.0225423	0.0225423	0.910047	0.995217	0.995217	1624846_at	1624846_at	FBgn0034221	39781	Flybase	CG10764-RA	CG10764-RA /FEA=BDGP /GEN=CG10764 /DB_XREF=CG10764 FBgn0034221 /SEG=chr2R:+12517143,12519456 /MAP=54B16-54B16 /LEN=1682 /DEF=(CG10764 gene symbol:CG10764 FBgn0034221 (GO:0004252 serine-type endopeptidase))	CG10764-RA	---	---	April 2004 (BDGP v4.0)	chr2R:13340923-13343236 (+) // 100.0 //	CG10764	CG10764	---	full length	FBgn0034221	36962	A1ZAT2 /// Q8MR00	EC:3.4.21.4	---	NP_611213	NM_137369	FBgn0034221	---	---	---	---	---	0006508 // proteolysis // inferred from electronic annotation /// 0006508 // proteolysis // non-traceable author statement	---	0003824 // catalytic activity // inferred from electronic annotation /// 0004252 // serine-type endopeptidase activity // inferred from sequence or structural similarity /// 0004252 // serine-type endopeptidase activity // inferred from electronic annotation /// 0008233 // peptidase activity // inferred from electronic annotation /// 0016787 // hydrolase activity // inferred from electronic annot…	---	---	---	---	This probe set was annotated using the Matching Probes based pipeline to a Entrez Gene identifier using 1 transcripts. // false // Matching Probes // A	NM_137369(14)
1638338_a_at	pearson	0.649241	0.574234	5.05003	3.90525	1.37921e-05	0.0232074	0.0139245	0.000475028	0.119897	0.119897	1638338_a_at	1638338_a_at	FBgn0000639	39781	Flybase	CG17285-RA	CG17285-RA /FEA=BDGP /GEN=Fbp1 /DB_XREF=CG17285 FBgn0000639 /SEG=chr3L:-14043468,14046936 /MAP=70D2-70D2 /LEN=3408 /DEF=(CG17285 gene symbol:Fbp1 FBgn0000639 (GO:0008565 protein transporter) (GO:0015032 storage protein uptake))	CG17285-RA	---	---	April 2004 (BDGP v4.0)	chr3L:14087688-14091156 (-) // 100.0 //	Protein-1	Fbp1	---	full length	FBgn0000639	39566	Q04691	---	---	NP_524065 /// NP_729959	NM_079341 /// NM_168578	FBgn0000639	---	---	---	---	---	0006810 // transport // inferred from electronic annotation /// 0015032 // storage protein import into fat body // inferred from physical interaction /// 0015032 // storage protein import into fat body // inferred from sequence or structural similarity	0005811 // lipid particle // inferred from direct assay	0005344 // oxygen transporter activity // inferred from electronic annotation /// 0008565 // protein transporter activity // inferred from physical interaction /// 0008565 // protein transporter activity // inferred from sequence or structural similarity	---	---	---	---	This probe set was annotated using the Matching Probes based pipeline to a Entrez Gene identifier using 3 transcripts. // false // Matching Probes // A	BT003568(14),NM_079341(14),NM_168578(14)
1636293_at	pearson	0.630651	0.675072	4.80756	5.09472	2.86523e-05	0.0241061	0.0222518	1.63706e-05	0.0165277	0.0165277	1636293_at	1636293_at	FBgn0027544	39781	Flybase	CG2217-RA	CG2217-RA /FEA=BDGP /SEG=chr3R:-26233851,26238059	CG2217-RA	---	---	April 2004 (BDGP v4.0)	chr3R:26244485-26248693 (-) // 100.0 //	CG2217	CG2217	---	full length	FBgn0027544	43607	Q9Y104	---	---	NP_651787	NM_143530	FBgn0027544	---	---	---	---	---	---	---	0005515 // protein binding // inferred from physical interaction	---	---	---	---	This probe set was annotated using the Matching Probes based pipeline to a Entrez Gene identifier using 2 transcripts. // false // Matching Probes // A	AF145669(14),NM_143530(14)
1637382_at	pearson	0.624662	0.363207	4.73246	2.17048	3.59007e-05	0.0241635	0.0241635	0.0377494	0.727325	0.727325	1637382_at	1637382_at	---	39781	Flybase	HDC02543	HDC02543 /FEA=HDP /SEG=chr2L:-14570139,14570386	HDC02543	---	---	April 2004 (BDGP v4.0)	chr2L:14587987-14588234 (-) // 100.0 //	---	---	---	---	---	---	---	---	---	---	---	---	---	---	---	---	---	---	---	---	---	---	---	---	This probe set was annotated using the Design Representative Id based pipeline to a Flybase identifier using 1 transcripts. // false // Design Representative Id // R	HDC02543
1631521_at	pearson	0.619634	0.681551	4.67046	5.18567	4.32305e-05	0.0256738	0.0272784	1.2612e-05	0.0141479	0.0141479	1631521_at	1631521_at	FBgn0053469	39781	Flybase	CG33469-RA	CG33469-RA /FEA=BDGP /SEG=chr2R:-9669418,9669901	CG33469-RA	---	---	April 2004 (BDGP v4.0)	chr2R:10493197-10493680 (-) // 100.0 //	CG33469	CG33469	---	full length	FBgn0053469	2768832	A1Z9S3 /// B3DMY9	---	---	NP_995836	NM_206114	FBgn0053469	---	---	---	---	---	---	---	---	---	---	---	---	This probe set was annotated using the Matching Probes based pipeline to a Entrez Gene identifier using 1 transcripts. // false // Matching Probes // A	NM_206114(14)
1627169_at	pearson	0.618611	0.0414342	4.65796	0.230894	4.48782e-05	0.0283182	0.0266524	0.818914	1.00021	1.00021	1627169_at	1627169_at	FBgn0034712	39781	Flybase	CG3264-RA	CG3264-RA /FEA=BDGP /GEN=CG3264 /DB_XREF=CG3264 FBgn0034712 /SEG=chr2R:-17252552,17254293 /MAP=58D1-58D1 /LEN=1621 /DEF=(CG3264 gene symbol:CG3264 FBgn0034712 (GO:0004035 alkaline phosphatase))	CG3264-RA	---	---	April 2004 (BDGP v4.0)	chr2R:18096506-18098247 (-) // 100.0 //	CG3264	CG3264	---	full length	FBgn0034712	37540	Q9W273	EC:3.1.3.1	---	NP_611655	NM_137811	FBgn0034712	---	---	---	---	---	0008152 // metabolic process // inferred from electronic annotation	---	0000287 // magnesium ion binding // inferred from electronic annotation /// 0003824 // catalytic activity // inferred from electronic annotation /// 0004035 // alkaline phosphatase activity // inferred from sequence or structural similarity /// 0004035 // alkaline phosphatase activity // inferred from electronic annotation /// 0008270 // zinc ion binding // inferred from electronic annotation ///…	---	---	---	---	This probe set was annotated using the Matching Probes based pipeline to a Entrez Gene identifier using 2 transcripts. // false // Matching Probes // A	AY119091(14),NM_137811(14)
1639256_at	pearson	0.374053	0.512229	2.38615	3.32069	0.0225673	0.0328157	1.09014	0.00230784	0.310667	0.310667	1639256_at	1639256_at	FBgn0032200	2008-11-29	Flybase	CG5676-RA	CG5676-RA /FEA=BDGP /GEN=CG5676 /DB_XREF=CG5676 FBgn0032200 /SEG=chr2L:-10247012,10248293 /MAP=31B4-31B4 /LEN=768 /DEF=(CG5676 gene symbol:CG5676 FBgn0032200 )	CG5676-RA	---	---	April 2004 (BDGP v4.0)	chr2L:10254603-10255884 (-) // 100.0 //	CG5676	CG5676	---	full length	FBgn0032200	34368	Q9VL16	---	---	NP_609362	NM_135518	FBgn0032200	---	---	---	---	---	---	---	---	---	IPR000340 // Dual specificity protein phosphatase // 2.7E-5	---	---	This probe set was annotated using the Matching Probes based pipeline to a Entrez Gene identifier using 2 transcripts. // false // Matching Probes // A	BT011027(14),NM_135518(14)
1634906_at	pearson	0.374013	0.309444	2.38585	1.81184	0.022583	0.0333233	1.0857	0.079709	0.859767	0.859767	1634906_at	1634906_at	FBgn0003721	39781	Flybase	CG4898-RC	CG4898-RC /FEA=BDGP /GEN=Tm1 /DB_XREF=CG4898 FBgn0003721 /SEG=chr3R:+11112738,11123423 /MAP=88E12-88E13 /LEN=3668 /DEF=(CG4898 gene symbol:Tm1 FBgn0003721 (GO:0003779 actin binding) (GO:0005862 muscle thin filament tropomyosin) (GO:0045451 pole plasm oskar mRNA localization))	CG4898-RC	---	---	April 2004 (BDGP v4.0)	chr3R:11112720-11123401 (+) // 99.89 //	alpha-Tubulin /// Tropomyosin	alphaTub84D /// Tm1	chr3-56.75 +/- 0.92	full length	FBgn0003721	40904 /// 41852	A4V2Y4 /// P06605 /// P06754 /// P49455 /// Q058U3 /// Q6LEH1 /// Q6NN28 /// Q8IG84 /// Q8IGY1 /// Q95TA3	---	---	NP_524264 /// NP_524360 /// NP_731169 /// NP_732001 /// NP_732002 /// NP_732003 /// NP_732004 /// NP_732005 /// NP_732006 /// NP_732007 /// NP_732008 /// NP_732009 /// NP_996216 /// NP_996217	NM_079540 /// NM_079636 /// NM_169189 /// NM_169633 /// NM_169634 /// NM_169635 /// NM_169636 /// NM_169637 /// NM_169638 /// NM_169639 /// NM_169640 /// NM_169641 /// NM_206494 /// NM_206495	FBgn0003721 /// FBgn0003885	---	---	---	---	---	0000910 // cytokinesis // inferred from mutant phenotype /// 0006936 // muscle contraction // non-traceable author statement /// 0007017 // microtubule-based process // inferred from sequence or structural similarity /// 0007017 // microtubule-based process // inferred from electronic annotation /// 0007018 // microtubule-based movement // inferred from electronic annotation /// 0007315 // pole p…	0005737 // cytoplasm // inferred from electronic annotation /// 0005811 // lipid particle // inferred from direct assay /// 0005856 // cytoskeleton // inferred from electronic annotation /// 0005862 // muscle thin filament tropomyosin // non-traceable author statement /// 0005874 // microtubule // inferred from electronic annotation /// 0005874 // microtubule // inferred from sequence or structur…	0000166 // nucleotide binding // inferred from electronic annotation /// 0003779 // actin binding // inferred from sequence or structural similarity /// 0003779 // actin binding // traceable author statement /// 0003779 // actin binding // inferred from electronic annotation /// 0003924 // GTPase activity // inferred from electronic annotation /// 0005198 // structural molecule activity // inferr…	---	---	---	---	This probe set was annotated using the Matching Probes based pipeline to a Entrez Gene identifier using 6 transcripts. // true // Matching Probes // A	FBtr0089961(14),FBtr0089962(14),FBtr0089963(14),NM_169639(14),NM_169640(14),NM_169641(14),AY060262(14),AY084208(14),BT001902(14),FBtr0089963(14),FBtr0089962(14),FBtr0089961(14)
1633459_a_at	pearson	-0.3751	-0.0603936	-2.39391	-0.336872	0.0221625	0.0334059	1.08093	0.738483	1.0009	1.0009	1633459_a_at	1633459_a_at	FBgn0020439	2008-11-29	Flybase	CG6544-RC	CG6544-RC /FEA=BDGP /GEN=fau /DB_XREF=CG6544 FBgn0020439 /SEG=chr3R:-6599271,6603101 /MAP=86C6-86C6 /LEN=672 /DEF=(CG6544 gene symbol:fau FBgn0020439 )	CG6544-RC	---	---	April 2004 (BDGP v4.0)	chr3R:6599253-6603083 (-) // 100.0 //	fau	fau	---	full length	FBgn0020439	41291	Q9VGX3	---	---	NP_650015 /// NP_731504 /// NP_731505 /// NP_731506	NM_141758 /// NM_169360 /// NM_169361 /// NM_169362	FBgn0020439	---	---	---	---	---	0006950 // response to stress // inferred from electronic annotation /// 0006979 // response to oxidative stress // inferred from direct assay	---	0005515 // protein binding // inferred from physical interaction	---	---	---	---	This probe set was annotated using the Matching Probes based pipeline to a Entrez Gene identifier using 7 transcripts. // false // Matching Probes // A	AF154418(12),AY060997(14),AY119569(14),NM_141758(14),NM_169360(14),NM_169361(14),NM_169362(14)
1633435_a_at	pearson	0.373833	-0.0062479	2.38451	-0.0347875	0.0226535	0.0335795	1.08393	0.972472	0.998381	0.998381	1633435_a_at	1633435_a_at	FBgn0040031	39781	Flybase	CG12061-RA	CG12061-RA /FEA=BDGP /GEN=CG12061 /DB_XREF=CG12061 FBgn0058148 /SEG=chrXh:-157651,169070 /LEN=1209 /DEF=(CG12061 gene symbol:CG12061 synonyms:(CG40148) FLAGGED_PROBLEMATIC FBgn0058148 (GO:0008273 calcium, potassium:sodium antiporter))	CG12061-RA	---	---	April 2004 (BDGP v4.0)	chrXHet:14883-26444 (+) // 100.0 //	CG12061	CG12061	---	full length	FBgn0040031	3354990	A8Y5A2 /// Q7PLW2 /// Q7PLW3	---	---	NP_001015258 /// NP_001015259 /// NP_001104467	NM_001015258 /// NM_001015259 /// NM_001110997	FBgn0040031	---	---	---	---	---	---	0016021 // integral to membrane // inferred from electronic annotation	0008273 // calcium, potassium:sodium antiporter activity // inferred from sequence or structural similarity	---	---	NP_001104467.1 // span:53-75,96-118,128-150,163-177,181-203,278-300,315-337,344-366,381-403,412-434 // numtm:10 /// NP_001015258.2 // span:23-45,52-74,108-130,205-227,242-264,271-293,308-330,339-361 // numtm:8 /// NP_001015259.2 // span:72-94,109-131,138-160,175-197,206-228 // numtm:5 /// GENSCAN00000006203 // span:20-42,47-69,113-132,278-300,313-335,345-367,380-402,417-439,514-536,556-578,585-60…	---	This probe set was annotated using the Matching Probes based pipeline to a Entrez Gene identifier using 3 transcripts. // false // Matching Probes // A	NM_001015258(14),NM_001015259(14),NM_001110997(14)
1630822_at	pearson	0.375003	0.263435	2.39319	1.52045	0.0221998	0.0336278	1.07754	0.138534	0.91955	0.91955	1630822_at	1630822_at	FBgn0032809	2008-11-29	Flybase	CG13078-RA	CG13078-RA /FEA=BDGP /GEN=CG13078 /DB_XREF=CG13078 FBgn0032809 /SEG=chr2L:+19542420,19543089 /MAP=37F1-37F1 /LEN=669 /DEF=(CG13078 gene symbol:CG13078 FBgn0032809 )	CG13078-RA	---	---	April 2004 (BDGP v4.0)	chr2L:19564337-19565006 (+) // 100.0 //	CG13078	CG13078	---	full length	FBgn0032809	35251	Q9VIT6	---	---	NP_609989	NM_136145	FBgn0032809	---	---	---	---	---	---	0016021 // integral to membrane // inferred from electronic annotation	---	---	---	FBtr0081256 // span:19-36,51-73,85-107,122-144,157-176,191-213 // numtm:6 /// NP_609989.1 // span:19-36,51-73,85-107,122-144,157-176,191-213 // numtm:6 /// AAY54975.1 // span:19-36,51-73,85-107,122-144,157-176,191-213 // numtm:6 /// GENSCAN00000006613 // span:19-36,51-73,85-107,122-144,157-176,191-213 // numtm:6 /// FBpp0080797 // span:19-36,51-73,85-107,122-144,157-176,191-213 // numtm:6	---	This probe set was annotated using the Matching Probes based pipeline to a Entrez Gene identifier using 2 transcripts. // false // Matching Probes // A	BT022559(14),NM_136145(14)
1639230_at	pearson	-0.376327	-0.103148	-2.40304	-0.577386	0.0216954	0.0341551	1.06328	0.567849	0.989301	0.989301	1639230_at	1639230_at	FBgn0042627	2008-11-29	Flybase	CG3524-RA	CG3524-RA /FEA=BDGP /GEN=v(2)k05816 /DB_XREF=CG3524 FBgn0042627 /SEG=chr2L:+3036541,3048170 /MAP=23D1-23D1 /LEN=7590 /DEF=(CG3524 gene symbol:v(2)k05816 FBgn0042627 (GO:0004313 (acyl-carrier protein) S-acetyltransferase) (GO:0004314 (acyl-carrier protein) S-malonyltransferase) (GO:0004315 3-oxoacyl-(acyl-carrier protein) synthase))	CG3524-RA	---	---	April 2004 (BDGP v4.0)	chr2L:3043972-3055601 (+) // 100.0 //	v(2)k05816	v(2)k05816	---	full length	FBgn0042627	117361	Q8MR70 /// Q9VQL6	EC:2.3.1.38 /// EC:2.3.1.39 /// EC:2.3.1.41	---	NP_647613	NM_139356	FBgn0042627	---	---	---	---	---	0008152 // metabolic process // inferred from electronic annotation /// 0009058 // biosynthetic process // inferred from electronic annotation	0005811 // lipid particle // inferred from direct assay	0003824 // catalytic activity // inferred from electronic annotation /// 0004313 // [acyl-carrier-protein] S-acetyltransferase activity // inferred from sequence or structural similarity /// 0004313 // [acyl-carrier-protein] S-acetyltransferase activity // inferred from electronic annotation /// 0004314 // [acyl-carrier-protein] S-malonyltransferase activity // inferred from sequence or structura…	---	---	---	---	This probe set was annotated using the Matching Probes based pipeline to a Entrez Gene identifier using 1 transcripts. // false // Matching Probes // A	NM_139356(14)
1623216_s_at	pearson	0.373785	0.715258	2.38416	5.6984	0.0226722	0.0342048	1.07971	2.9013e-06	0.00585831	0.00585831	1623216_s_at	1623216_s_at	FBgn0036857	39781	Flybase	CG9629-RA	CG9629-RA /FEA=BDGP /GEN=CG9629 /DB_XREF=CG9629 FBgn0036857 /SEG=chr3L:-19215350,19217788 /MAP=76A3-76A3 /LEN=2050 /DEF=(CG9629 gene symbol:CG9629 FBgn0036857 (GO:0004029 aldehyde dehydrogenase (NAD+)))	CG9629-RA	---	---	April 2004 (BDGP v4.0)	chr3L:19259571-19262009 (-) // 100.0 //	CG9629	CG9629	---	full length	FBgn0036857	40097	Q8SXQ1	EC:1.2.1.3	---	NP_649099	NM_140842	FBgn0036857	---	---	---	---	---	0008152 // metabolic process // inferred from electronic annotation /// 0055114 // oxidation reduction // inferred from electronic annotation	---	0004029 // aldehyde dehydrogenase (NAD) activity // inferred from sequence or structural similarity /// 0004029 // aldehyde dehydrogenase (NAD) activity // inferred from electronic annotation /// 0016491 // oxidoreductase activity // inferred from electronic annotation	---	---	---	---	This probe set was annotated using the Matching Probes based pipeline to a Entrez Gene identifier using 2 transcripts. // false // Matching Probes // A	AY089492(14),NM_140842(14)
1626303_s_at	pearson	0.373514	0.367905	2.38215	2.20291	0.0227784	0.0343701	1.07967	0.0351631	0.721558	0.721558	1626303_s_at	1626303_s_at	FBgn0085282	2008-11-29	Flybase	S.C3L002302	S.C3L002302 /FEA=fgenesh /SEG=chr3L:-18035574,18036076	S.C3L002302	---	---	April 2004 (BDGP v4.0)	chr3L:18079795-18080297 (-) // 100.0 //	---	CG34253	---	full length	FBgn0085282	5740501	A8JNV2 /// Q8SZC4	---	---	NP_001097636	NM_001104166	FBgn0085282	---	---	---	---	---	---	---	---	---	---	---	---	This probe set was annotated using the Matching Probes based pipeline to a Entrez Gene identifier using 1 transcripts. // false // Matching Probes // A	NM_001104166(14)
1628232_at	pearson	0.373485	0.304171	2.38193	1.77779	0.0227896	0.034646	1.07516	0.0852507	0.864148	0.864148	1628232_at	1628232_at	FBgn0050046	2008-11-29	Flybase	CG30046-RB	CG30046-RB /FEA=BDGP /GEN=CG30046 /DB_XREF=CG30046 FBgn0050046 /SEG=chr2R:+7378831,7381944 /MAP=48F7-48F7 /LEN=2642 /DEF=(CG30046 gene symbol:CG30046 synonyms:(CG17740) FBgn0050046 )	CG30046-RB	---	---	April 2004 (BDGP v4.0)	chr2R:8201623-8204736 (+) // 100.0 //	CG30046	CG30046	---	full length	FBgn0050046	36334	A1Z8W6 /// Q8T988	---	---	NP_725129	NM_165878	FBgn0050046	---	---	---	---	---	---	---	0004867 // serine-type endopeptidase inhibitor activity // inferred from electronic annotation /// 0005509 // calcium ion binding // inferred from electronic annotation	---	IPR002223 // Proteinase inhibitor I2, Kunitz metazoa // 0.026 /// IPR002223 // Proteinase inhibitor I2, Kunitz metazoa // 0.026 /// IPR002223 // Proteinase inhibitor I2, Kunitz metazoa // 0.026	---	---	This probe set was annotated using the Matching Probes based pipeline to a Entrez Gene identifier using 1 transcripts. // false // Matching Probes // A	NM_165878(14)
1638184_at	pearson	0.377563	0.525501	2.41224	3.43898	0.0212335	0.0350111	1.05085	0.00168688	0.262012	0.262012	1638184_at	1638184_at	FBgn0035282	2008-11-29	Flybase	CG13936-RA	CG13936-RA /FEA=BDGP /GEN=CG13936 /DB_XREF=CG13936 FBgn0035282 /SEG=chr3L:-1831976,1832869 /MAP=62B7-62B7 /LEN=570 /DEF=(CG13936 gene symbol:CG13936 FBgn0035282 )	CG13936-RA	---	---	April 2004 (BDGP v4.0)	chr3L:1851347-1852240 (-) // 100.0 //	CG13936	CG13936	---	full length	FBgn0035282	38242	Q4V5Y1 /// Q9W076	---	---	NP_647669	NM_139412	FBgn0035282	---	---	---	---	---	---	---	0005515 // protein binding // inferred from physical interaction	---	---	FBtr0072868 // span:13-35 // numtm:1 /// NP_647669.1 // span:13-35 // numtm:1 /// AAY54941.1 // span:13-35 // numtm:1 /// FBpp0072747 // span:13-35 // numtm:1	---	This probe set was annotated using the Matching Probes based pipeline to a Entrez Gene identifier using 1 transcripts. // false // Matching Probes // A	NM_139412(14)
1636526_at	pearson	-0.373372	-0.298332	-2.3811	-1.74029	0.0228342	0.0350728	1.07225	0.091728	0.876146	0.876146	1636526_at	1636526_at	FBgn0036876	2008-11-29	Flybase	CG9451-RA	CG9451-RA /FEA=BDGP /GEN=CG9451 /DB_XREF=CG9451 FBgn0036876 /SEG=chr3L:-19447262,19449691 /MAP=76B5-76B5 /LEN=1419 /DEF=(CG9451 gene symbol:CG9451 FBgn0036876 (GO:0003993 acid phosphatase))	CG9451-RA	---	---	April 2004 (BDGP v4.0)	chr3L:19491483-19493912 (-) // 100.0 //	CG9451	CG9451	---	full length	FBgn0036876	40118	Q9VW00	EC:3.1.3.2	---	NP_649118	NM_140861	FBgn0036876	---	---	---	---	---	---	---	0003993 // acid phosphatase activity // inferred from sequence or structural similarity /// 0003993 // acid phosphatase activity // inferred from electronic annotation /// 0016787 // hydrolase activity // inferred from electronic annotation	---	---	---	---	This probe set was annotated using the Matching Probes based pipeline to a Entrez Gene identifier using 1 transcripts. // false // Matching Probes // A	NM_140861(14)
1634731_at	pearson	0.368224	0.129797	2.34307	0.728842	0.0249364	0.0351029	1.1042	0.471569	0.985706	0.985706	1634731_at	1634731_at	FBgn0033397	39781	Flybase	CG10843-RA	CG10843-RA /FEA=BDGP /GEN=Cyp4p3 /DB_XREF=CG10843 FBgn0033397 /SEG=chr2R:+4303087,4305157 /MAP=45B7-45B8 /LEN=1646 /DEF=(CG10843 gene symbol:Cyp4p3 FBgn0033397 (GO:0015034 cytochrome P450) (GO:0005792 microsome) (GO:0016020 membrane))	CG10843-RA	---	---	April 2004 (BDGP v4.0)	chr2R:5129845-5131915 (+) // 100.0 //	Cyp4p3	Cyp4p3	---	full length	FBgn0033397	35948	Q9V559	---	---	NP_610473	NM_136629	FBgn0033397	---	---	---	---	---	0055114 // oxidation reduction // inferred from electronic annotation	0005783 // endoplasmic reticulum // inferred from electronic annotation /// 0005789 // endoplasmic reticulum membrane // inferred from electronic annotation /// 0005792 // microsome // non-traceable author statement /// 0005792 // microsome // inferred from electronic annotation /// 0016020 // membrane // non-traceable author statement /// 0016020 // membrane // inferred from electronic annotation	0004497 // monooxygenase activity // inferred from electronic annotation /// 0005506 // iron ion binding // inferred from electronic annotation /// 0009055 // electron carrier activity // inferred from electronic annotation /// 0009055 // electron carrier activity // inferred from sequence or structural similarity /// 0009055 // electron carrier activity // non-traceable author statement /// 0016…	---	---	FBtr0088593 // span:2-19 // numtm:1 /// NP_610473.1 // span:2-19 // numtm:1 /// AAL68069.1 // span:2-19 // numtm:1 /// GENSCAN00000016510 // span:5-22,416-435 // numtm:2 /// FBpp0087674 // span:2-19 // numtm:1	---	This probe set was annotated using the Matching Probes based pipeline to a Entrez Gene identifier using 2 transcripts. // false // Matching Probes // A	AY075201(14),NM_136629(14)
1631764_a_at	pearson	-0.377177	-0.36808	-2.40936	-2.20412	0.0213767	0.0351211	1.05278	0.0350696	0.722576	0.722576	1631764_a_at	1631764_a_at	FBgn0050115	2008-11-29	Flybase	CG30115-RD	CG30115-RD /FEA=BDGP /GEN=CG30115 /DB_XREF=CG30115 FBgn0050115 /SEG=chr2R:-13617914,13625355 /MAP=55D3-55D4 /LEN=4920 /DEF=(CG30115 gene symbol:CG30115 synonyms:(CG18430 CG5503) FBgn0050115 (GO:0005085 guanyl-nucleotide exchange factor))	CG30115-RD	---	---	April 2004 (BDGP v4.0)	chr2R:14441699-14449140 (-) // 100.0 //	CG30115	CG30115	---	full length	FBgn0050115	37134	A1ZBA1 /// B3DN64 /// Q8MSP7 /// Q8MZA4 /// Q961L9	---	---	NP_611343 /// NP_788403	NM_137499 /// NM_176223	FBgn0050115	---	---	---	---	---	0035023 // regulation of Rho protein signal transduction // inferred from electronic annotation	0005622 // intracellular // inferred from electronic annotation	0005085 // guanyl-nucleotide exchange factor activity // inferred from sequence or structural similarity /// 0005089 // Rho guanyl-nucleotide exchange factor activity // inferred from electronic annotation	---	---	---	---	This probe set was annotated using the Matching Probes based pipeline to a Entrez Gene identifier using 3 transcripts. // false // Matching Probes // A	AY051517(14),NM_137499(14),NM_176223(14)
1639440_at	pearson	-0.370613	-0.0315021	-2.36069	-0.175484	0.0239417	0.0351228	1.08881	0.861841	0.998869	0.998869	1639440_at	1639440_at	FBgn0035611	2008-11-29	Flybase	CG13285-RA	CG13285-RA /FEA=BDGP /GEN=CG13285 /DB_XREF=CG13285 FBgn0035611 /SEG=chr3L:-5494132,5494965 /MAP=64D3-64D3 /LEN=597 /DEF=(CG13285 gene symbol:CG13285 FBgn0035611 )	CG13285-RA	---	---	April 2004 (BDGP v4.0)	chr3L:5527924-5528757 (-) // 100.0 //	CG13285	CG13285	---	full length	FBgn0035611	38623	Q29QL3 /// Q9VRM1	---	---	NP_647969	NM_139712	FBgn0035611	---	---	---	---	---	---	---	---	---	---	ABC86439.1 // span:31-53 // numtm:1	---	This probe set was annotated using the Matching Probes based pipeline to a Entrez Gene identifier using 1 transcripts. // false // Matching Probes // A	NM_139712(14)
1640857_at	pearson	-0.372751	-0.307596	-2.3765	-1.79988	0.0230795	0.0351396	1.07378	0.0816188	0.864662	0.864662	1640857_at	1640857_at	FBgn0039118	2008-11-29	Flybase	CG10208-RA	CG10208-RA /FEA=BDGP /GEN=CG10208 /DB_XREF=CG10208 FBgn0039118 /SEG=chr3R:-19589371,19590502 /MAP=95B1-95B2 /LEN=1065 /DEF=(CG10208 gene symbol:CG10208 FBgn0039118 )	CG10208-RA	---	---	April 2004 (BDGP v4.0)	chr3R:19598714-19599845 (-) // 100.0 //	CG10208	CG10208	---	full length	FBgn0039118	42814	Q9VCH7	---	---	NP_651186	NM_142929	FBgn0039118	---	---	---	---	---	---	---	0005515 // protein binding // inferred from physical interaction	---	---	---	---	This probe set was annotated using the Matching Probes based pipeline to a Entrez Gene identifier using 2 transcripts. // false // Matching Probes // A	AY071595(14),NM_142929(14)
1633876_at	pearson	0.371433	0.383598	2.36674	2.3127	0.023608	0.0351544	1.08339	0.0275447	0.695228	0.695228	1633876_at	1633876_at	FBgn0032521	2008-11-29	Flybase	CG7110-RB	CG7110-RB /FEA=BDGP /GEN=CG7110 /DB_XREF=CG7110 FBgn0032521 /SEG=chr2L:+13387858,13399917 /MAP=34B10-34B11 /LEN=3045 /DEF=(CG7110 gene symbol:CG7110 FBgn0032521 )	CG7110-RB	---	---	April 2004 (BDGP v4.0)	chr2L:13398988-13411047 (+) // 100.0 //	CG7110	CG7110	---	full length	FBgn0032521	34757	Q95TH1 /// Q960Q6 /// Q9VJY3	---	---	NP_609652	NM_135808	FBgn0032521	---	---	---	---	---	---	---	---	---	---	---	---	This probe set was annotated using the Matching Probes based pipeline to a Entrez Gene identifier using 1 transcripts. // false // Matching Probes // A	NM_135808(14)
1634481_at	pearson	-0.372226	-0.110688	-2.37261	-0.620098	0.0232889	0.0352036	1.07856	0.539725	0.987329	0.987329	1634481_at	1634481_at	---	2008-11-29	Flybase	CG7481-RA	CG7481-RA /FEA=BDGP /GEN=RhoGAP18B /DB_XREF=CG7481 FBgn0030986 /SEG=chrX:-18874410,18896289 /MAP=18A3-18A4 /LEN=2192 /DEF=(CG7481 gene symbol:RhoGAP18B synonyms:(CG7531 CG17015) FBgn0030986 )	CG7481-RA	---	---	April 2004 (BDGP v4.0)	chrX:19037483-19059362 (-) // 100.0 //	---	---	---	full length	FBgn0030986	---	Q00IM9 /// Q00IN0 /// Q9VWL9	---	---	NP_573351	NM_133123	---	---	---	---	---	---	0007165 // signal transduction // inferred from electronic annotation	0005622 // intracellular // inferred from electronic annotation	0005515 // protein binding // inferred from physical interaction	---	---	---	---	This probe set was annotated using the Matching Probes based pipeline to a Entrez Gene identifier using 3 transcripts. // false // Matching Probes // A	AY061332(14),DQ486141(14),NM_133123(14)
1625816_at	pearson	-0.37174	0.177824	-2.36901	1.00611	0.0234842	0.035277	1.08263	0.32215	0.959134	0.959134	1625816_at	1625816_at	FBgn0035043	2008-11-29	Flybase	CG4781-RA	CG4781-RA /FEA=BDGP /GEN=CG4781 /DB_XREF=CG4781 FBgn0035043 /SEG=chr2R:-19684250,19685805 /MAP=60D10-60D10 /LEN=1555 /DEF=(CG4781 gene symbol:CG4781 FBgn0035043 )	CG4781-RA	---	---	April 2004 (BDGP v4.0)	chr2R:20528205-20529760 (-) // 100.0 //	CG4781	CG4781	---	full length	FBgn0035043	37943	Q9W128	---	---	NP_611951	NM_138107	FBgn0035043	---	---	---	---	---	---	---	0005515 // protein binding // inferred from electronic annotation	---	---	FBtr0072335 // span:415-437 // numtm:1 /// NP_611951.1 // span:415-437 // numtm:1 /// AAL49087.1 // span:415-437 // numtm:1 /// GENSCAN00000018057 // span:415-437 // numtm:1 /// FBpp0072242 // span:415-437 // numtm:1	---	This probe set was annotated using the Matching Probes based pipeline to a Entrez Gene identifier using 2 transcripts. // false // Matching Probes // A	AY071465(14),NM_138107(14)
1639447_at	pearson	0.370512	0.261485	2.35994	1.50837	0.023983	0.0353839	1.08579	0.141585	0.919257	0.919257	1639447_at	1639447_at	FBgn0039829	2008-11-29	Flybase	CG15561-RA	CG15561-RA /FEA=BDGP /GEN=CG15561 /DB_XREF=CG15561 FBgn0039829 /SEG=chr3R:-27029895,27030994 /MAP=100B3-100B3 /LEN=1099 /DEF=(CG15561 gene symbol:CG15561 FBgn0039829 )	CG15561-RA	---	---	April 2004 (BDGP v4.0)	chr3R:27040529-27041628 (-) // 100.0 //	CG15561	CG15561	---	full length	FBgn0039829	43692	Q9V9Z8	---	---	NP_651851	NM_143594	FBgn0039829	---	---	---	---	---	---	0005622 // intracellular // inferred from electronic annotation	0003676 // nucleic acid binding // inferred from electronic annotation /// 0005515 // protein binding // inferred from physical interaction	---	---	---	---	This probe set was annotated using the Matching Probes based pipeline to a Entrez Gene identifier using 1 transcripts. // false // Matching Probes // A	NM_143594(14)
1623900_a_at	pearson	-0.368099	-0.141091	-2.34215	-0.793496	0.0249894	0.0353997	1.10172	0.433521	0.984662	0.984662	1623900_a_at	1623900_a_at	FBgn0032382	2008-11-29	Flybase	CG14935-RA	CG14935-RA /FEA=BDGP /GEN=CG14935 /DB_XREF=CG14935 FBgn0032382 /SEG=chr2L:+11838832,11841440 /MAP=33A4-33A4 /LEN=1929 /DEF=(CG14935 gene symbol:CG14935 FBgn0032382 (GO:0004558 alpha-glucosidase))	CG14935-RA	---	---	April 2004 (BDGP v4.0)	chr2L:11849961-11852569 (+) // 100.0 //	CG14935	CG14935	---	full length	FBgn0032382	34598	A9UND4 /// Q8IPA2 /// Q8SYS2 /// Q9VKE5	EC:3.2.1.20	---	NP_609523 /// NP_723693	NM_135679 /// NM_164975	FBgn0032382	---	---	---	---	---	0005975 // carbohydrate metabolic process // inferred from electronic annotation /// 0008152 // metabolic process // inferred from electronic annotation	---	0003824 // catalytic activity // inferred from electronic annotation /// 0004558 // alpha-glucosidase activity // inferred from sequence or structural similarity /// 0004558 // alpha-glucosidase activity // inferred from electronic annotation /// 0005515 // protein binding // inferred from physical interaction /// 0016787 // hydrolase activity // inferred from electronic annotation /// 0016798 //…	---	---	---	---	This probe set was annotated using the Matching Probes based pipeline to a Entrez Gene identifier using 2 transcripts. // false // Matching Probes // A	NM_135679(14),NM_164975(14)
1636872_at	pearson	-0.367659	-0.182133	-2.33892	-1.03132	0.0251766	0.0354064	1.10514	0.310368	0.955329	0.955329	1636872_at	1636872_at	FBgn0020766	2008-11-29	Flybase	CG13348-RA	CG13348-RA /FEA=BDGP /SEG=chr2R:+9033060,9034616	CG13348-RA	---	---	April 2004 (BDGP v4.0)	chr2R:9855851-9857407 (+) // 100.0 //	Phenylalanyl-tRNA synthetase	Aats-phe	---	full length	FBgn0020766	36547	O16129	EC:6.1.1.20	---	NP_477283	NM_057935	FBgn0020766	---	---	---	---	---	0006412 // translation // inferred from electronic annotation /// 0006418 // tRNA aminoacylation for protein translation // inferred from electronic annotation /// 0006432 // phenylalanyl-tRNA aminoacylation // inferred from sequence or structural similarity /// 0006432 // phenylalanyl-tRNA aminoacylation // inferred from electronic annotation /// 0008033 // tRNA processing // inferred from elect…	0005625 // soluble fraction // inferred from sequence or structural similarity /// 0005737 // cytoplasm // inferred from electronic annotation /// 0005739 // mitochondrion // inferred from sequence or structural similarity /// 0005739 // mitochondrion // inferred from electronic annotation /// 0005759 // mitochondrial matrix // inferred from electronic annotation	0000049 // tRNA binding // inferred from electronic annotation /// 0000049 // tRNA binding // inferred from sequence or structural similarity /// 0000166 // nucleotide binding // inferred from electronic annotation /// 0000287 // magnesium ion binding // inferred from electronic annotation /// 0004812 // aminoacyl-tRNA ligase activity // inferred from electronic annotation /// 0004826 // phenylal…	---	---	---	---	This probe set was annotated using the Matching Probes based pipeline to a Entrez Gene identifier using 2 transcripts. // false // Matching Probes // A	AY058580(14),NM_057935(14)
1630669_at	pearson	0.373333	0.375197	2.3808	2.25365	0.0228496	0.0354634	1.06801	0.0314342	0.700573	0.700573	1630669_at	1630669_at	FBgn0032282	39781	Flybase	CG7299-RA	CG7299-RA /FEA=BDGP /GEN=CG7299 /DB_XREF=CG7299 FBgn0032282 /SEG=chr2L:-10676169,10676816 /MAP=32A2-32A2 /LEN=647 /DEF=(CG7299 gene symbol:CG7299 FBgn0032282 )	CG7299-RA	---	---	April 2004 (BDGP v4.0)	chr2L:10683760-10684407 (-) // 100.0 //	CG7299	CG7299	---	full length	FBgn0032282	34468	Q9VKS1	---	---	NP_609436	NM_135592	FBgn0032282	---	---	---	---	---	---	---	---	---	---	---	---	This probe set was annotated using the Matching Probes based pipeline to a Entrez Gene identifier using 2 transcripts. // false // Matching Probes // A	AY118625(14),NM_135592(14)
1632277_a_at	pearson	-0.367307	0.140086	-2.33633	0.787735	0.0253271	0.035529	1.10694	0.436834	0.984216	0.984216	1632277_a_at	1632277_a_at	FBgn0026428	2008-11-29	Flybase	CG6170-RA	CG6170-RA /FEA=BDGP /GEN=HDAC6 /DB_XREF=CG6170 FBgn0026428 /SEG=chrX:+15063968,15071369 /MAP=13B6-13B6 /LEN=4833 /DEF=(CG6170 gene symbol:HDAC6 FBgn0026428 (GO:0004407 histone deacetylase))	CG6170-RA	---	---	April 2004 (BDGP v4.0)	chrX:15226987-15234388 (+) // 100.0 //	histone deacetylase HDA2	HDAC6	---	full length	FBgn0026428	32461	Q86NK9 /// Q8IR37 /// Q8IR38 /// Q9XYX1	EC:3.5.1.-	---	NP_573017 /// NP_727842 /// NP_727843	NM_132789 /// NM_167436 /// NM_167437	FBgn0026428	---	---	---	---	---	0006350 // transcription // inferred from electronic annotation /// 0006355 // regulation of transcription, DNA-dependent // inferred from electronic annotation /// 0016568 // chromatin modification // inferred from electronic annotation /// 0016575 // histone deacetylation // inferred from direct assay	0005634 // nucleus // inferred from electronic annotation	0004407 // histone deacetylase activity // inferred from direct assay /// 0004407 // histone deacetylase activity // inferred from sequence or structural similarity /// 0004407 // histone deacetylase activity // non-traceable author statement /// 0005515 // protein binding // inferred from physical interaction /// 0008270 // zinc ion binding // inferred from electronic annotation /// 0016787 // h…	---	---	---	---	This probe set was annotated using the Matching Probes based pipeline to a Entrez Gene identifier using 3 transcripts. // false // Matching Probes // A	NM_132789(14),NM_167436(14),NM_167437(14)
1630746_at	pearson	0.37138	0.111142	2.36636	0.622672	0.0236293	0.0356648	1.07946	0.538054	0.987672	0.987672	1630746_at	1630746_at	FBgn0051807	2008-11-29	Flybase	CG31807-RA	CG31807-RA /FEA=BDGP /GEN=CG31807 /DB_XREF=CG31807 FBgn0051807 /SEG=chr2L:-16659982,16660450 /MAP=36A10-36A10 /LEN=468 /DEF=(CG31807 gene symbol:CG31807 FBgn0051807 )	CG31807-RA	---	---	April 2004 (BDGP v4.0)	chr2L:16681898-16682366 (-) // 100.0 //	CG31807	CG31807	---	full length	FBgn0051807	318953	Q8IP15	---	---	NP_723984	NM_165170	FBgn0051807	---	---	---	---	---	---	---	0005515 // protein binding // inferred from electronic annotation /// 0008270 // zinc ion binding // inferred from electronic annotation /// 0046872 // metal ion binding // inferred from electronic annotation	---	---	---	---	This probe set was annotated using the Matching Probes based pipeline to a Entrez Gene identifier using 2 transcripts. // false // Matching Probes // A	BT023659(14),NM_165170(14)
1633573_a_at	pearson	-0.369966	-0.0361149	-2.35591	-0.20121	0.0242076	0.0356789	1.08622	0.841848	0.9998	0.9998	1633573_a_at	1633573_a_at	FBgn0067782	2008-11-29	Flybase	CG4241-RA	CG4241-RA /FEA=BDGP /GEN=CG4241 /DB_XREF=CG4241 FBgn0038801 /SEG=chr3R:-16378647,16383420 /MAP=92F1-92F1 /LEN=1394 /DEF=(CG4241 gene symbol:CG4241 FBgn0038801 (GO:0005386 carrier) (GO:0005740 mitochondrial membrane))	CG4241-RA	---	---	April 2004 (BDGP v4.0)	chr3R:16378630-16383403 (-) // 100.0 //	alternative testis transcripts /// alternative testis transcripts	att-ORFA /// att-ORFB	---	full length	FBgn0067782 /// FBgn0067783	2768673 /// 42429	Q7KSA5 /// Q8IN53 /// Q9VDL7	---	---	NP_650891 /// NP_732519 /// NP_996244 /// NP_996245	NM_142634 /// NM_169901 /// NM_206522 /// NM_206523	FBgn0067782 /// FBgn0067783	---	---	---	---	---	0006810 // transport // inferred from electronic annotation	0005740 // mitochondrial envelope // inferred from sequence or structural similarity /// 0005743 // mitochondrial inner membrane // inferred from electronic annotation /// 0016020 // membrane // inferred from electronic annotation /// 0016021 // integral to membrane // inferred from electronic annotation	0005488 // binding // inferred from electronic annotation /// 0022857 // transmembrane transporter activity // inferred from sequence or structural similarity	---	---	---	---	This probe set was annotated using the Matching Probes based pipeline to a Entrez Gene identifier using 4 transcripts. // true // Matching Probes // A	FBtr0090034(14),FBtr0089480(14),FBtr0089481(14),FBtr0089482(14),NM_169901(14),NM_206523(14),NM_142634(14),NM_206522(14),GENSCAN00000015313(14),FBtr0089480(14),FBtr0089481(14),FBtr0089482(14),FBtr0090034(14)
1629098_at	pearson	0.367204	0.404452	2.33557	2.46227	0.0253714	0.0357402	1.1041	0.0195665	0.654116	0.654116	1629098_at	1629098_at	FBgn0028945	2008-11-29	Flybase	CG7631-RA	CG7631-RA /FEA=BDGP /SEG=chr2L:+15606767,15607600	CG7631-RA	---	---	April 2004 (BDGP v4.0)	chr2L:15628683-15629516 (+) // 100.0 //	CG7631	CG7631	---	full length	FBgn0028945	34919	Q4V3N0 /// Q9V3R0	EC:3.4.24.21	---	NP_609760	NM_135916	FBgn0028945	---	---	---	---	---	0006508 // proteolysis // inferred from electronic annotation	---	0004222 // metalloendopeptidase activity // inferred from sequence or structural similarity /// 0008233 // peptidase activity // inferred from electronic annotation /// 0008237 // metallopeptidase activity // inferred from electronic annotation /// 0008270 // zinc ion binding // inferred from electronic annotation /// 0016787 // hydrolase activity // inferred from electronic annotation /// 004687…	---	---	---	---	This probe set was annotated using the Matching Probes based pipeline to a Entrez Gene identifier using 1 transcripts. // false // Matching Probes // A	NM_135916(14)
1629035_at	pearson	-0.366479	0.0757392	-2.33024	0.422913	0.0256843	0.0359801	1.10816	0.675278	0.999943	0.999943	1629035_at	1629035_at	FBgn0039419	2008-11-29	Flybase	CG12290-RA	CG12290-RA /FEA=BDGP /GEN=CG12290 /DB_XREF=CG12290 FBgn0039419 /SEG=chr3R:+22045338,22048435 /MAP=97A6-97A6 /LEN=3097 /DEF=(CG12290 gene symbol:CG12290 FBgn0039419 (GO:0007186 G-protein coupled receptor protein signaling pathway) (GO:0016526 G-protein coupled receptor, unknown ligand) (GO:0016021 integral to membrane))	CG12290-RA	---	---	April 2004 (BDGP v4.0)	chr3R:22055973-22059064 (+) // 99.81 //	CG12290	CG12290	---	full length	FBgn0039419	43182	Q9VBG4	---	---	NP_651470	NM_143213	FBgn0039419	---	---	---	---	---	0007186 // G-protein coupled receptor protein signaling pathway // inferred from electronic annotation /// 0007186 // G-protein coupled receptor protein signaling pathway // inferred from sequence or structural similarity	0016021 // integral to membrane // inferred from electronic annotation /// 0016021 // integral to membrane // inferred from sequence or structural similarity	0001584 // rhodopsin-like receptor activity // inferred from electronic annotation /// 0004930 // G-protein coupled receptor activity // inferred from sequence or structural similarity	---	IPR000276 // Rhodopsin-like GPCR superfamily // 1.2E-9	FBtr0084990 // span:5-27,40-62,173-195,208-230,261-283,566-588,598-620 // numtm:7 /// NP_651470.1 // span:5-27,40-62,173-195,208-230,261-283,566-588,598-620 // numtm:7 /// AAL13580.1 // span:5-27,40-62,173-195,208-230,261-283,566-588,598-620 // numtm:7 /// GENSCAN00000000989 // span:7-29,39-61,177-196,211-233,254-276 // numtm:5 /// FBpp0084363 // span:5-27,40-62,173-195,208-230,261-283,566-588,59…	---	This probe set was annotated using the Matching Probes based pipeline to a Entrez Gene identifier using 2 transcripts. // false // Matching Probes // A	AY058351(14),NM_143213(14)
1640768_at	pearson	0.369444	0.187972	2.35206	1.06558	0.0244244	0.0359932	1.0863	0.294844	0.95746	0.95746	1640768_at	1640768_at	FBgn0032834	39781	Flybase	CG13965-RA	CG13965-RA /FEA=BDGP /GEN=CG13965 /DB_XREF=CG13965 FBgn0032834 /SEG=chr2L:-19939913,19940375 /MAP=38A8-38A8 /LEN=402 /DEF=(CG13965 gene symbol:CG13965 FBgn0032834 )	CG13965-RA	---	---	April 2004 (BDGP v4.0)	chr2L:19961836-19962298 (-) // 100.0 //	CG13965	CG13965	---	full length	FBgn0032834	35280	Q4V6C0 /// Q9VIQ7	---	---	NP_610014	NM_136170	FBgn0032834	---	---	---	---	---	---	---	0005515 // protein binding // inferred from physical interaction	---	---	AAY54802.1 // span:7-29 // numtm:1	---	This probe set was annotated using the Matching Probes based pipeline to a Entrez Gene identifier using 1 transcripts. // false // Matching Probes // A	NM_136170(14)
1632372_at	pearson	-0.367017	-0.286577	-2.33419	-1.66545	0.025452	0.0360145	1.10285	0.1059	0.902248	0.902248	1632372_at	1632372_at	FBgn0051076	2008-11-29	Flybase	CG31076-RA	CG31076-RA /FEA=BDGP /GEN=CG31076 /DB_XREF=CG31076 FBgn0051076 /SEG=chr3R:-22804121,22804965 /MAP=97D12-97D12 /LEN=573 /DEF=(CG31076 gene symbol:CG31076 synonyms:(CG6309) FBgn0051076 )	CG31076-RA	---	---	April 2004 (BDGP v4.0)	chr3R:22814756-22815600 (-) // 100.0 //	CG31076	CG31076	---	full length	FBgn0051076	318582	Q8IMQ4	---	---	NP_733184	NM_170305	FBgn0051076	---	---	---	---	---	---	---	0005515 // protein binding // inferred from electronic annotation /// 0005515 // protein binding // inferred from physical interaction	---	---	---	---	This probe set was annotated using the Matching Probes based pipeline to a Entrez Gene identifier using 1 transcripts. // false // Matching Probes // A	NM_170305(14)
1628169_at	pearson	-0.366184	-0.0247675	-2.32808	-0.137942	0.0258125	0.0360796	1.10895	0.891179	0.995281	0.995281	1628169_at	1628169_at	FBgn0039555	2008-11-29	Flybase	CG12261-RA	CG12261-RA /FEA=BDGP /GEN=mRpS22 /DB_XREF=CG12261 FBgn0039555 /SEG=chr3R:+23731995,23733335 /MAP=98B6-98B6 /LEN=1340 /DEF=(CG12261 gene symbol:mRpS22 FBgn0039555 (GO:0005763 mitochondrial small ribosomal subunit) (GO:0006412 protein biosynthesis) (GO:0003735 structural constituent of ribosome))	CG12261-RA	---	---	April 2004 (BDGP v4.0)	chr3R:23742630-23743970 (+) // 100.0 //	mitochondrial ribosomal protein S22	mRpS22	---	full length	FBgn0039555	43345	Q9VAY9	---	---	NP_524537	NM_079813	FBgn0039555	---	---	---	---	---	0006412 // translation // inferred from sequence or structural similarity	0005763 // mitochondrial small ribosomal subunit // inferred from sequence or structural similarity	0003735 // structural constituent of ribosome // inferred from sequence or structural similarity /// 0005515 // protein binding // inferred from physical interaction	---	---	---	---	This probe set was annotated using the Matching Probes based pipeline to a Entrez Gene identifier using 2 transcripts. // false // Matching Probes // A	BT021953(14),NM_079813(14)
1623197_a_at	pearson	-0.370489	-0.20961	-2.35977	-1.19357	0.0239925	0.0361426	1.08137	0.2417	0.958444	0.958444	1623197_a_at	1623197_a_at	FBgn0052311	2008-11-29	Flybase	CG5699-RA	CG5699-RA /FEA=BDGP /GEN=CG5699 /DB_XREF=CG5699 FBgn0035303 /SEG=chr3L:-2103247,2107243 /MAP=62C4-62C4 /LEN=1982 /DEF=(CG5699 gene symbol:CG5699 FBgn0035303 )	CG5699-RA	---	---	April 2004 (BDGP v4.0)	chr3L:2122618-2126614 (-) // 100.0 //	D-Titin	zormin	---	full length	FBgn0052311	2769001	Q0E8J3 /// Q0E8J4 /// Q3KN34 /// Q7Z1Y4 /// Q8SXC1 /// Q9W053	---	---	NP_001036577 /// NP_001036578 /// NP_001036579 /// NP_995962	NM_001043112 /// NM_001043113 /// NM_001043114 /// NM_206240	FBgn0052311	---	---	---	---	---	---	---	0005200 // structural constituent of cytoskeleton // inferred from sequence or structural similarity	---	---	---	---	This probe set was annotated using the Matching Probes based pipeline to a Entrez Gene identifier using 3 transcripts. // false // Matching Probes // A	NM_001043112(14),NM_001043114(14),NM_206240(14)
1636249_at	pearson	-0.36604	-0.0653394	-2.32702	-0.364574	0.0258753	0.0363031	1.10694	0.717905	0.997518	0.997518	1636249_at	1636249_at	FBgn0041707	2008-11-29	Flybase	CG1168-RA	CG1168-RA /FEA=BDGP /GEN=7B2 /DB_XREF=CG1168 FBgn0041707 /SEG=chr3R:+1202472,1203694 /MAP=83A1-83A1 /LEN=1159 /DEF=(CG1168 gene symbol:7B2 FBgn0041707 (GO:0016484 proprotein convertase 2 activator) (GO:0016486 peptide hormone processing))	CG1168-RA	---	---	April 2004 (BDGP v4.0)	chr3R:1202475-1203697 (+) // 100.0 //	7B2	7B2	---	full length	FBgn0041707	40644	Q59E04 /// Q9N9Z7 /// Q9VNB0	---	---	NP_001014608 /// NP_620471	NM_001014608 /// NM_138986	FBgn0041707	---	---	---	---	---	0007218 // neuropeptide signaling pathway // inferred from electronic annotation /// 0016486 // peptide hormone processing // inferred from sequence or structural similarity	0030141 // secretory granule // inferred from electronic annotation	0005515 // protein binding // inferred from physical interaction /// 0016484 // proprotein convertase 2 activator activity // inferred from sequence or structural similarity	---	IPR012934 // Zinc finger, AD-type // 2.3E-9	FBtr0100112 // span:7-29 // numtm:1 /// NP_001014608.1 // span:7-29 // numtm:1 /// FBpp0100150 // span:7-29 // numtm:1	---	This probe set was annotated using the Matching Probes based pipeline to a Entrez Gene identifier using 2 transcripts. // false // Matching Probes // A	NM_001014608(14),NM_138986(14)
1628655_at	pearson	0.365693	-0.156556	2.32448	-0.882549	0.0260271	0.0363947	1.10873	0.384273	0.972579	0.972579	1628655_at	1628655_at	FBgn0035969	2008-11-29	Flybase	CG4476-RB	CG4476-RB /FEA=BDGP /GEN=CG4476 /DB_XREF=CG4476 FBgn0035969 /SEG=chr3L:+9170593,9173979 /MAP=67A2-67A3 /LEN=2409 /DEF=(CG4476 gene symbol:CG4476 FBgn0035969 (GO:0017032 potassium:amino acid transporter))	CG4476-RB	---	---	April 2004 (BDGP v4.0)	chr3L:9204983-9208369 (+) // 100.0 //	CG4476	CG4476	---	full length	FBgn0035969	39056	A9LRV8 /// Q86P29 /// Q9VSV2	---	---	NP_648293	NM_140036	FBgn0035969	---	---	---	---	---	0006810 // transport // inferred from electronic annotation /// 0006836 // neurotransmitter transport // inferred from electronic annotation	0005887 // integral to plasma membrane // inferred from electronic annotation /// 0016020 // membrane // inferred from electronic annotation /// 0016021 // integral to membrane // inferred from electronic annotation	0005328 // neurotransmitter:sodium symporter activity // inferred from electronic annotation /// 0015293 // symporter activity // inferred from electronic annotation /// 0017032 // potassium:amino acid symporter activity // inferred from sequence or structural similarity	---	---	FBtr0076429 // span:57-79,89-111,132-154,220-242,251-273,297-319,332-354,397-419,431-453,463-485,506-528,543-565 // numtm:12 /// NP_648293.1 // span:57-79,89-111,132-154,220-242,251-273,297-319,332-354,397-419,431-453,463-485,506-528,543-565 // numtm:12 /// AAO39513.1 // span:57-79,89-111,132-154,220-242,251-273,297-319,332-354,397-419,431-453,463-485,506-528,543-565 // numtm:12 /// GENSCAN000000…	---	This probe set was annotated using the Matching Probes based pipeline to a Entrez Gene identifier using 1 transcripts. // false // Matching Probes // A	NM_140036(14)
1637437_at	pearson	-0.369927	-0.303468	-2.35562	-1.77326	0.0242241	0.0364535	1.08215	0.0860114	0.864911	0.864911	1637437_at	1637437_at	FBgn0037794	2008-11-29	Flybase	CG6254-RA	CG6254-RA /FEA=BDGP /GEN=CG6254 /DB_XREF=CG6254 FBgn0037794 /SEG=chr3R:-5984875,5987068 /MAP=85F15-85F15 /LEN=2011 /DEF=(CG6254 gene symbol:CG6254 FBgn0037794 )	CG6254-RA	---	---	April 2004 (BDGP v4.0)	chr3R:5984857-5987050 (-) // 100.0 //	CG6254	CG6254	---	full length	FBgn0037794	41244	Q6NND3 /// Q8MR10 /// Q9VH18	---	---	NP_649983	NM_141726	FBgn0037794	---	---	---	---	---	---	0005622 // intracellular // inferred from electronic annotation /// 0005634 // nucleus // inferred from electronic annotation	0005515 // protein binding // inferred from physical interaction /// 0008270 // zinc ion binding // inferred from electronic annotation	---	---	---	---	This probe set was annotated using the Matching Probes based pipeline to a Entrez Gene identifier using 1 transcripts. // false // Matching Probes // A	NM_141726(14)
1641578_at	pearson	-0.36551	-0.492603	-2.32313	-3.1516	0.0261076	0.0366086	1.10749	0.00358775	0.369612	0.369612	1641578_at	1641578_at	FBgn0004569	2008-11-29	Flybase	CG4531-RA	CG4531-RA /FEA=BDGP /GEN=argos /DB_XREF=CG4531 FBgn0004569 /SEG=chr3L:-16419257,16432580 /MAP=73A2-73A2 /LEN=2880 /DEF=(CG4531 gene symbol:argos FBgn0004569 (GO:0005576 extracellular) (GO:0048019 receptor antagonist) (GO:0005154 epidermal growth factor receptor ligand) (GO:0007411 axon guidance) (GO:0042059 negative regulation of EGF receptor signaling pathway))	CG4531-RA	---	---	April 2004 (BDGP v4.0)	chr3L:16463478-16476801 (-) // 100.0 //	Argos	argos	---	full length	FBgn0004569	39833	Q00805	---	---	NP_524107	NM_079383	FBgn0004569	---	---	---	---	---	0001654 // eye development // inferred from mutant phenotype /// 0006917 // induction of apoptosis // inferred from mutant phenotype /// 0007275 // multicellular organismal development // inferred from electronic annotation /// 0007411 // axon guidance // non-traceable author statement /// 0007455 // eye-antennal disc morphogenesis // inferred from mutant phenotype /// 0007472 // wing disc morpho…	0005576 // extracellular region // inferred from sequence or structural similarity /// 0005576 // extracellular region // non-traceable author statement /// 0005576 // extracellular region // traceable author statement /// 0005576 // extracellular region // inferred from electronic annotation	0005154 // epidermal growth factor receptor binding // non-traceable author statement /// 0005154 // epidermal growth factor receptor binding // traceable author statement /// 0048019 // receptor antagonist activity // non-traceable author statement /// 0048019 // receptor antagonist activity // traceable author statement	---	---	FBtr0075408 // span:5-24 // numtm:1 /// NP_524107.2 // span:5-24 // numtm:1 /// AAA28379.1 // span:5-24 // numtm:1 /// FBpp0075166 // span:5-24 // numtm:1	---	This probe set was annotated using the Matching Probes based pipeline to a Entrez Gene identifier using 1 transcripts. // false // Matching Probes // A	NM_079383(14)
1641623_at	pearson	0.365388	0.494939	2.32224	3.17139	0.0261613	0.0367963	1.10512	0.00340872	0.362257	0.362257	1641623_at	1641623_at	FBgn0034199	39781	Flybase	CG15917-RA	CG15917-RA /FEA=BDGP /GEN=CG15917 /DB_XREF=CG15917 FBgn0034199 /SEG=chr2R:+12200222,12200579 /MAP=54A1-54A1 /LEN=357 /DEF=(CG15917 gene symbol:CG15917 FBgn0034199 )	CG15917-RA	---	---	April 2004 (BDGP v4.0)	chr2R:13024002-13024359 (+) // 100.0 //	CG15917	CG15917	---	full length	FBgn0034199	36936	A1ZAQ9 /// Q4QPY1	---	---	NP_611194	NM_137350	FBgn0034199	---	---	---	---	---	---	---	---	---	---	AAY85035.1 // span:13-35 // numtm:1	---	This probe set was annotated using the Matching Probes based pipeline to a Entrez Gene identifier using 1 transcripts. // false // Matching Probes // A	NM_137350(14)
1638101_at	pearson	-0.378904	-0.134378	-2.42224	-0.75503	0.0207413	0.0368344	1.03155	0.455929	0.98314	0.98314	1638101_at	1638101_at	FBgn0039742	2008-11-29	Flybase	CG15528-RA	CG15528-RA /FEA=BDGP /GEN=CG15528 /DB_XREF=CG15528 FBgn0039742 /SEG=chr3R:-25863896,25864619 /MAP=99D3-99D3 /LEN=639 /DEF=(CG15528 gene symbol:CG15528 FBgn0039742 (GO:0006470 protein amino acid dephosphorylation) (GO:0008138 protein tyrosineserinethreonine phosphatase))	CG15528-RA	---	---	April 2004 (BDGP v4.0)	chr3R:25874530-25875253 (-) // 100.0 // /// chrUextra:21280218-21280786 (-) // 88.89 //	MKP-like	CG15528	---	full length	FBgn0039742	43575	B3DNI0 /// Q9VAB0	---	---	NP_651767	NM_143510	FBgn0039742	---	---	---	---	---	0006470 // protein amino acid dephosphorylation // inferred from electronic annotation /// 0006470 // protein amino acid dephosphorylation // non-traceable author statement /// 0016311 // dephosphorylation // inferred from electronic annotation	---	0004725 // protein tyrosine phosphatase activity // inferred from electronic annotation /// 0008138 // protein tyrosine/serine/threonine phosphatase activity // inferred from electronic annotation /// 0008138 // protein tyrosine/serine/threonine phosphatase activity // non-traceable author statement /// 0016787 // hydrolase activity // inferred from electronic annotation /// 0016791 // phosphatas…	---	---	---	---	This probe set was annotated using the Matching Probes based pipeline to a Entrez Gene identifier using 1 transcripts. // false // Matching Probes // A	NM_143510(14)
1626256_at	pearson	-0.364862	-0.380582	-2.31838	-2.29142	0.026394	0.0368567	1.11031	0.028893	0.689607	0.689607	1626256_at	1626256_at	FBgn0039060	2008-11-29	Flybase	CG13836-RA	CG13836-RA /FEA=BDGP /GEN=CG13836 /DB_XREF=CG13836 FBgn0039060 /SEG=chr3R:+18986482,18986863 /MAP=94E3-94E3 /LEN=381 /DEF=(CG13836 gene symbol:CG13836 FBgn0039060 )	CG13836-RA	---	---	April 2004 (BDGP v4.0)	chr3R:18995825-18996206 (+) // 100.0 //	CG13836	CG13836	---	full length	FBgn0039060	42741	Q9VCQ1	---	---	NP_651130	NM_142873	FBgn0039060	---	---	---	---	---	---	---	---	---	---	---	---	This probe set was annotated using the Matching Probes based pipeline to a Entrez Gene identifier using 1 transcripts. // false // Matching Probes // A	NM_142873(14)
1633881_at	pearson	-0.3648	-0.0321097	-2.31792	-0.178872	0.0264216	0.0370747	1.10686	0.859202	0.999252	0.999252	1633881_at	1633881_at	FBgn0259678	2008-11-29	Flybase	CG1776-RA	CG1776-RA /FEA=BDGP /GEN=CG1776 /DB_XREF=CG1776 FBgn0033441 /SEG=chr2R:-4779271,4805906 /MAP=46B2-46B2 /LEN=2075 /DEF=(CG1776 gene symbol:CG1776 FBgn0033441 (GO:0004674 protein serinethreonine kinase) (GO:0006468 protein amino acid phosphorylation))	CG1776-RA	---	---	April 2004 (BDGP v4.0)	chr2R:5606143-5632778 (-) // 100.0 //	MLCK-like	CG42347	---	full length	FBgn0033441	---	Q1RKW2 /// Q95SK9	EC:2.7.11.18	---	NP_610514	NM_136670	FBgn0259678	---	---	---	---	---	0006468 // protein amino acid phosphorylation // inferred from electronic annotation /// 0006468 // protein amino acid phosphorylation // non-traceable author statement /// 0007015 // actin filament organization // inferred from mutant phenotype /// 0008360 // regulation of cell shape // inferred from mutant phenotype	---	0000166 // nucleotide binding // inferred from electronic annotation /// 0004672 // protein kinase activity // inferred from electronic annotation /// 0004674 // protein serine/threonine kinase activity // inferred from electronic annotation /// 0004674 // protein serine/threonine kinase activity // non-traceable author statement /// 0004687 // myosin light chain kinase activity // inferred from …	---	IPR001245 // Tyrosine protein kinase // 3.3E-16	---	---	This probe set was annotated using the Matching Probes based pipeline to a Entrez Gene identifier using 2 transcripts. // false // Matching Probes // A	AY060726(14),NM_136670(14)
1641487_a_at	pearson	-0.379266	0.0148624	-2.42494	0.0827597	0.0206101	0.0370908	1.0301	0.934575	0.996248	0.996248	1641487_a_at	1641487_a_at	FBgn0020653	2008-11-29	Flybase	CG2151-RA	CG2151-RA /FEA=BDGP /SEG=chrX:+7981429,7986985	CG2151-RA	---	---	April 2004 (BDGP v4.0)	chrX:8136516-8142072 (+) // 100.0 //	thioredoxin reductase	Trxr-1	---	full length	FBgn0020653	31760	P91938 /// Q1RKZ0 /// Q53YG2	EC:1.8.1.7 /// EC:1.8.1.9	---	NP_511082 /// NP_727251 /// NP_727252	NM_078527 /// NM_167149 /// NM_167150	FBgn0020653	---	---	---	---	---	0008340 // determination of adult life span // traceable author statement /// 0045454 // cell redox homeostasis // inferred by curator /// 0045454 // cell redox homeostasis // inferred from electronic annotation /// 0045454 // cell redox homeostasis // inferred from mutant phenotype /// 0055114 // oxidation reduction // inferred from electronic annotation	0005737 // cytoplasm // inferred from direct assay /// 0005737 // cytoplasm // non-traceable author statement /// 0005737 // cytoplasm // inferred from electronic annotation /// 0005739 // mitochondrion // inferred from direct assay /// 0005739 // mitochondrion // inferred from electronic annotation	0004362 // glutathione-disulfide reductase activity // inferred from direct assay /// 0004362 // glutathione-disulfide reductase activity // non-traceable author statement /// 0004791 // thioredoxin-disulfide reductase activity // inferred from direct assay /// 0004791 // thioredoxin-disulfide reductase activity // inferred from sequence or structural similarity /// 0004791 // thioredoxin-disulfi…	---	IPR003953 // Fumarate reductase/succinate dehydrogenase flavoprotein, N-terminal // 4.7E-5 /// IPR003953 // Fumarate reductase/succinate dehydrogenase flavoprotein, N-terminal // 4.7E-5 /// IPR003953 // Fumarate reductase/succinate dehydrogenase flavoprotein, N-terminal // 4.7E-5 /// IPR003953 // Fumarate reductase/succinate dehydrogenase flavoprotein, N-terminal // 1.5E-6 /// IPR004792 // HI0933…	---	---	This probe set was annotated using the Matching Probes based pipeline to a Entrez Gene identifier using 4 transcripts. // false // Matching Probes // A	BT025070(14),NM_078527(14),NM_167149(14),NM_167150(14)
1632528_at	pearson	-0.364471	-0.306797	-2.31551	-1.79472	0.026568	0.0371923	1.10839	0.0824549	0.868055	0.868055	1632528_at	1632528_at	---	2008-11-29	Flybase	RH42808	RH42808 /FEA=sim4 /SEG=chr3R:-13725074,13727325	RH42808	---	---	April 2004 (BDGP v4.0)	chr3R:13725059-13727310 (-) // 100.0 //	---	---	---	full length	---	---	Q8IGE4 /// Q95T36	---	---	NP_001014630	NM_001014630	---	---	---	---	---	---	0006886 // intracellular protein transport // inferred from electronic annotation /// 0007269 // neurotransmitter secretion // non-traceable author statement /// 0016079 // synaptic vesicle exocytosis // inferred from sequence or structural similarity /// 0016192 // vesicle-mediated transport // non-traceable author statement /// 0017157 // regulation of exocytosis // inferred from sequence or st…	0008021 // synaptic vesicle // non-traceable author statement	0005083 // small GTPase regulator activity // inferred from sequence or structural similarity /// 0008270 // zinc ion binding // inferred from electronic annotation /// 0017137 // Rab GTPase binding // inferred from electronic annotation	---	---	---	---	This probe set was annotated using the Matching Probes based pipeline to a UniGene identifier using 1 transcripts. // false // Matching Probes // A	BT001822(13)
1637983_s_at	pearson	-0.364029	-0.188724	-2.31228	-1.07	0.0267656	0.0373136	1.11204	0.292881	0.959108	0.959108	1637983_s_at	1637983_s_at	FBgn0039109	2008-11-29	Flybase	CG10365-RC	CG10365-RC /FEA=BDGP /GEN=CG10365 /DB_XREF=CG10365 FBgn0039109 /SEG=chr3R:+19539742,19547884 /MAP=95B1-95B1 /LEN=1686 /DEF=(CG10365 gene symbol:CG10365 FBgn0039109 )	CG10365-RC	---	---	April 2004 (BDGP v4.0)	chr3R:19549085-19557227 (+) // 100.0 //	CG10365	CG10365	---	full length	FBgn0039109	42801	Q9VCI9	---	---	NP_651176 /// NP_732896 /// NP_732897 /// NP_996270	NM_142919 /// NM_170086 /// NM_170087 /// NM_206547	FBgn0039109	---	---	---	---	---	---	---	0005515 // protein binding // inferred from physical interaction	---	---	---	---	This probe set was annotated using the Matching Probes based pipeline to a Entrez Gene identifier using 4 transcripts. // false // Matching Probes // A	NM_142919(14),NM_170086(14),NM_170087(14),NM_206547(14)
1632699_s_at	pearson	0.361434	0.448876	2.2933	2.79683	0.027952	0.0373483	1.13335	0.00878634	0.531179	0.531179	1632699_s_at	1632699_s_at	---	39781	Flybase	CG32954-RA	CG32954-RA /FEA=BDGP /GEN=CG32954 /DB_XREF=CG32954 FBgn0052954 /SEG=chr2L:+14597706,14601054 /MAP=35B3-35B3 /LEN=2077 /DEF=(CG32954 gene symbol:CG32954 FBgn0052954 )	CG32954-RA	---	---	April 2004 (BDGP v4.0)	chr2L:14615554-14618902 (+) // 100.0 //	---	---	---	full length	FBgn0000055 /// FBgn0000056	---	P00334 /// P91615 /// Q1ECB3 /// Q29QY4	EC:1.1.1.1	---	NP_001027266 /// NP_001027267 /// NP_001027268 /// NP_001027269 /// NP_001027270 /// NP_001027272 /// NP_477495	NM_001032095 /// NM_001032096 /// NM_001032097 /// NM_001032098 /// NM_001032099 /// NM_001032101 /// NM_058147	---	---	---	---	---	---	0006066 // cellular alcohol metabolic process // inferred from electronic annotation /// 0006069 // ethanol oxidation // non-traceable author statement /// 0006614 // SRP-dependent cotranslational protein targeting to membrane // inferred from electronic annotation /// 0007165 // signal transduction // inferred from electronic annotation /// 0007600 // sensory perception // inferred from electron…	0005811 // lipid particle // inferred from direct assay /// 0016020 // membrane // inferred from electronic annotation	0003824 // catalytic activity // inferred from electronic annotation /// 0004022 // alcohol dehydrogenase activity // inferred from direct assay /// 0004022 // alcohol dehydrogenase activity // non-traceable author statement /// 0004022 // alcohol dehydrogenase activity // inferred from electronic annotation /// 0004022 // alcohol dehydrogenase activity // traceable author statement /// 0004022 /…	---	---	---	---	This probe set was annotated using the Matching Probes based pipeline to a Entrez Gene identifier using 4 transcripts. // true // Matching Probes // A	FBtr0100593(14),FBtr0100591(14),FBtr0006151(14),FBtr0100187(14),NM_001032101(14),NM_001032098(14),NM_001032097(14),NM_058147(14),GENSCAN00000003789(14),FBtr0100591(14),FBtr0100593(14),FBtr0006151(14),FBtr0100187(14)
1629027_at	pearson	0.363916	0.0115984	2.31145	0.0645817	0.0268163	0.037462	1.10958	0.948922	0.997015	0.997015	1629027_at	1629027_at	FBgn0037291	2008-11-29	Flybase	CG14662-RA	CG14662-RA /FEA=BDGP /GEN=CG14662 /DB_XREF=CG14662 FBgn0037291 /SEG=chr3R:-807717,809951 /MAP=82E4-82E4 /LEN=2000 /DEF=(CG14662 gene symbol:CG14662 FBgn0037291 )	CG14662-RA	---	---	April 2004 (BDGP v4.0)	chr3R:807720-809954 (-) // 100.0 //	CG14662	CG14662	---	full length	FBgn0037291	40614	Q8T4D5 /// Q9VN74	---	---	NP_649510	NM_141253	FBgn0037291	---	---	---	---	---	---	---	0005515 // protein binding // inferred from electronic annotation	---	IPR001611 // Leucine-rich repeat // 1.7	FBtr0078846 // span:29-48,421-443 // numtm:2 /// NP_649510.2 // span:29-48,421-443 // numtm:2 /// AAL89981.1 // span:29-48,421-443 // numtm:2 /// GENSCAN00000009057 // span:29-48,421-443 // numtm:2 /// FBpp0078487 // span:29-48,421-443 // numtm:2	---	This probe set was annotated using the Matching Probes based pipeline to a Entrez Gene identifier using 1 transcripts. // false // Matching Probes // A	NM_141253(14)
1628261_at	pearson	-0.362046	-0.185557	-2.29777	-1.0514	0.0276683	0.0375556	1.12637	0.301204	0.953578	0.953578	1628261_at	1628261_at	FBgn0036589	2008-11-29	Flybase	CG13067-RA	CG13067-RA /FEA=BDGP /GEN=CG13067 /DB_XREF=CG13067 FBgn0036589 /SEG=chr3L:+16220187,16220798 /MAP=72D10-72D10 /LEN=538 /DEF=(CG13067 gene symbol:CG13067 FBgn0036589 )	CG13067-RA	---	---	April 2004 (BDGP v4.0)	chr3L:16264408-16265019 (+) // 100.0 //	CG13067	CG13067	---	full length	FBgn0036589	39785	Q6NMW6 /// Q7KUP0 /// Q9VV11	---	---	NP_648857	NM_140600	FBgn0036589	---	---	---	---	---	---	---	0005515 // protein binding // inferred from physical interaction	---	---	FBtr0075465 // span:7-29,39-61 // numtm:2 /// NP_648857.1 // span:7-29,39-61 // numtm:2 /// FBpp0075220 // span:7-29,39-61 // numtm:2	---	This probe set was annotated using the Matching Probes based pipeline to a Entrez Gene identifier using 1 transcripts. // false // Matching Probes // A	NM_140600(14)
1627242_at	pearson	-0.363721	-0.126396	-2.31002	-0.709433	0.0269045	0.0376268	1.10869	0.483358	0.986852	0.986852	1627242_at	1627242_at	FBgn0011296	2008-11-29	Flybase	CG4533-RA	CG4533-RA /FEA=BDGP /GEN=l(2)efl /DB_XREF=CG4533 FBgn0011296 /SEG=chr2R:-18728218,18729108 /MAP=59F6-59F6 /LEN=735 /DEF=(CG4533 gene symbol:l(2)efl FBgn0011296 (GO:0003773 heat shock protein))	CG4533-RA	---	---	April 2004 (BDGP v4.0)	chr2R:19572173-19573063 (-) // 100.0 //	lethal (2) essential for life	l(2)efl	---	full length	FBgn0011296	37744	P82147	---	---	NP_523827 /// NP_726354	NM_079103 /// NM_166620	FBgn0011296	---	---	---	---	---	0006950 // response to stress // inferred from electronic annotation /// 0007275 // multicellular organismal development // inferred from electronic annotation /// 0009408 // response to heat // non-traceable author statement /// 0009790 // embryonic development // non-traceable author statement	---	0042802 // identical protein binding // inferred from physical interaction	---	---	---	---	This probe set was annotated using the Matching Probes based pipeline to a Entrez Gene identifier using 2 transcripts. // false // Matching Probes // A	AY047516(14),NM_079103(14)
1640489_at	pearson	-0.361409	-0.0553413	-2.29312	-0.3086	0.0279635	0.0376878	1.12928	0.75969	1.00207	1.00207	1640489_at	1640489_at	FBgn0038347	2008-11-29	Flybase	CG18522-RA	CG18522-RA /FEA=BDGP /GEN=CG18522 /DB_XREF=CG18522 FBgn0038347 /SEG=chr3R:-11357876,11363028 /MAP=88F7-88F7 /LEN=4224 /DEF=(CG18522 gene symbol:CG18522 FBgn0038347 )	CG18522-RA	---	---	April 2004 (BDGP v4.0)	chr3R:11357858-11363010 (-) // 100.0 //	CG18522	CG18522	---	full length	FBgn0038347	41894	Q9VF53	---	---	NP_650475	NM_142218	FBgn0038347	---	---	---	---	---	---	---	0003824 // catalytic activity // inferred from electronic annotation /// 0005506 // iron ion binding // inferred from electronic annotation /// 0005515 // protein binding // inferred from physical interaction /// 0009055 // electron carrier activity // inferred from electronic annotation /// 0016491 // oxidoreductase activity // inferred from electronic annotation /// 0046872 // metal ion binding…	---	---	---	---	This probe set was annotated using the Matching Probes based pipeline to a Entrez Gene identifier using 2 transcripts. // false // Matching Probes // A	AY122178(14),NM_142218(14)
1627104_at	pearson	-0.35942	-0.21885	-2.27862	-1.24878	0.028902	0.0377288	1.1488	0.221096	0.963809	0.963809	1627104_at	1627104_at	FBgn0038597	2008-11-29	Flybase	CG8064-RA	CG8064-RA /FEA=BDGP /GEN=CG8064 /DB_XREF=CG8064 FBgn0038597 /SEG=chr3R:+14109399,14112367 /MAP=91A1-91A1 /LEN=2904 /DEF=(CG8064 gene symbol:CG8064 FBgn0038597 )	CG8064-RA	---	---	April 2004 (BDGP v4.0)	chr3R:14109383-14112351 (+) // 100.0 //	CG8064	CG8064	---	full length	FBgn0038597	42196	Q9VE98	---	---	NP_650705	NM_142448	FBgn0038597	---	---	---	---	---	0006364 // rRNA processing // inferred from electronic annotation	0032040 // small-subunit processome // inferred from electronic annotation	---	---	---	---	---	This probe set was annotated using the Matching Probes based pipeline to a Entrez Gene identifier using 2 transcripts. // false // Matching Probes // A	AY047497(14),NM_142448(14)
1630733_s_at	pearson	-0.360563	-0.324134	-2.28695	-1.9077	0.0283597	0.037778	1.13619	0.0657314	0.831609	0.831609	1630733_s_at	1630733_s_at	FBgn0259222	2008-11-29	Flybase	CG31203-RA	CG31203-RA /FEA=BDGP /GEN=CG31203 /DB_XREF=CG31203 FBgn0051203 /SEG=chr3R:+16565852,16579405 /MAP=92F10-92F12 /LEN=2017 /DEF=(CG31203 gene symbol:CG31203 synonyms:(CG15689 CG15688) FBgn0051203 )	CG31203-RA	---	---	April 2004 (BDGP v4.0)	chr3R:16565835-16579363 (+) // 98.76 //	CG42322	CG42322	---	full length	FBgn0051203	---	Q8IN50 /// Q8T0M8	---	---	NP_732547 /// NP_732548 /// NP_732549 /// NP_732550 /// NP_732551	NM_169918 /// NM_169919 /// NM_169920 /// NM_169921 /// NM_169922	FBgn0259222	---	---	---	---	---	---	0016020 // membrane // inferred from electronic annotation	---	---	IPR000620 // Protein of unknown function DUF6, transmembrane // 3.1E-4 /// IPR000620 // Protein of unknown function DUF6, transmembrane // 3.1E-4	FBtr0083923 // span:163-180,249-271,300-322,326-348,353-372,382-404,417-439,449-468,477-499,509-528 // numtm:10 /// FBtr0083924 // span:163-180,249-271,300-322,326-348,353-372,382-404,417-439,449-468,477-499,509-528 // numtm:10 /// FBtr0083925 // span:163-180,249-271,300-322,326-348,353-372,382-404,417-439,449-468,477-499,509-528 // numtm:10 /// FBtr0083926 // span:163-180,249-271,300-322,326-348…	---	This probe set was annotated using the Matching Probes based pipeline to a Entrez Gene identifier using 6 transcripts. // false // Matching Probes // A	AY069167(14),NM_169918(14),NM_169919(14),NM_169920(14),NM_169921(14),NM_169922(14)
1625262_at	pearson	-0.363513	-0.408534	-2.30849	-2.49207	0.0269984	0.0378315	1.10803	0.0182552	0.660591	0.660591	1625262_at	1625262_at	FBgn0039167	2008-11-29	Flybase	CG17786-RA	CG17786-RA /FEA=BDGP /GEN=CG17786 /DB_XREF=CG17786 FBgn0039167 /SEG=chr3R:-20031001,20035095 /MAP=95F2-95F2 /LEN=4094 /DEF=(CG17786 gene symbol:CG17786 FBgn0039167 )	CG17786-RA	---	---	April 2004 (BDGP v4.0)	chr3R:20040344-20044438 (-) // 100.0 //	CG17786	CG17786	---	full length	FBgn0039167	42879	Q9VCB5	---	---	NP_651231	NM_142974	FBgn0039167	---	---	---	---	---	---	---	---	---	---	---	---	This probe set was annotated using the Matching Probes based pipeline to a Entrez Gene identifier using 2 transcripts. // false // Matching Probes // A	AY070899(14),NM_142974(14)
1641337_at	pearson	-0.361226	-0.368335	-2.29179	-2.20589	0.0280488	0.0379192	1.12821	0.0349332	0.724201	0.724201	1641337_at	1641337_at	FBgn0031232	2008-11-29	Flybase	CG11617-RA	CG11617-RA /FEA=BDGP /GEN=CG11617 /DB_XREF=CG11617 FBgn0031232 /SEG=chr2L:-204734,207297 /MAP=21B4-21B4 /LEN=1267 /DEF=(CG11617 gene symbol:CG11617 FBgn0031232 (GO:0003700 transcription factor) (GO:0005634 nucleus))	CG11617-RA	---	---	April 2004 (BDGP v4.0)	chr2L:204734-207297 (-) // 100.0 //	CG11617	CG11617	---	full length	FBgn0031232	33183	Q9VPL4	---	---	NP_608502	NM_134658	FBgn0031232	---	---	---	---	---	0006355 // regulation of transcription, DNA-dependent // inferred from electronic annotation /// 0045449 // regulation of transcription // inferred from electronic annotation	0005634 // nucleus // inferred from sequence or structural similarity /// 0005634 // nucleus // inferred from electronic annotation	0003677 // DNA binding // inferred from electronic annotation /// 0003700 // transcription factor activity // inferred from sequence or structural similarity /// 0003700 // transcription factor activity // inferred from electronic annotation /// 0043565 // sequence-specific DNA binding // inferred from electronic annotation	---	---	---	---	This probe set was annotated using the Matching Probes based pipeline to a Entrez Gene identifier using 2 transcripts. // false // Matching Probes // A	AY070989(14),NM_134658(14)
1632752_at	pearson	-0.363235	-0.0306307	-2.30647	-0.170625	0.0271239	0.0379442	1.10868	0.865628	0.99776	0.99776	1632752_at	1632752_at	FBgn0015591	2008-11-29	Flybase	CG13633-RA	CG13633-RA /FEA=BDGP /GEN=Ast /DB_XREF=CG13633 FBgn0015591 /SEG=chr3R:-20576908,20581437 /MAP=96A20-96A20 /LEN=1446 /DEF=(CG13633 gene symbol:Ast FBgn0015591 (GO:0016086 allatostatin) (GO:0005184 neuropeptide hormone) (GO:0007218 neuropeptide signaling pathway))	CG13633-RA	---	---	April 2004 (BDGP v4.0)	chr3R:20586251-20590780 (-) // 100.0 //	drostatin-A4	Ast	---	full length	FBgn0015591	42947	Q9VC44	---	---	NP_524489	NM_079765	FBgn0015591	---	---	---	---	---	0007218 // neuropeptide signaling pathway // non-traceable author statement /// 0007218 // neuropeptide signaling pathway // traceable author statement /// 0007218 // neuropeptide signaling pathway // inferred from electronic annotation /// 0045968 // negative regulation of juvenile hormone biosynthetic process // non-traceable author statement	0005576 // extracellular region // inferred from electronic annotation	0005102 // receptor binding // non-traceable author statement /// 0005179 // hormone activity // inferred from sequence or structural similarity /// 0005179 // hormone activity // non-traceable author statement /// 0005179 // hormone activity // traceable author statement /// 0005184 // neuropeptide hormone activity // inferred from electronic annotation /// 0005184 // neuropeptide hormone activi…	---	IPR010276 // Allatostatin // 1.9E-16	AAF97792.1 // span:4-26 // numtm:1	---	This probe set was annotated using the Matching Probes based pipeline to a Entrez Gene identifier using 1 transcripts. // false // Matching Probes // A	NM_079765(14)
1638409_at	pearson	-0.360402	0.0875067	-2.28578	0.489093	0.0284352	0.0379638	1.13471	0.628219	0.994433	0.994433	1638409_at	1638409_at	FBgn0035147	2008-11-29	Flybase	CG12030-RA	CG12030-RA /FEA=BDGP /GEN=CG12030 /DB_XREF=CG12030 FBgn0035147 /SEG=chr3L:+629145,631942 /MAP=61C8-61C8 /LEN=1797 /DEF=(CG12030 gene symbol:CG12030 FBgn0035147 (GO:0006012 galactose metabolism) (GO:0003978 UDP-glucose 4-epimerase))	CG12030-RA	---	---	April 2004 (BDGP v4.0)	chr3L:648516-651313 (+) // 100.0 //	CG12030	CG12030	---	full length	FBgn0035147	38076	Q8MZ78 /// Q9W0P5	EC:5.1.3.2	---	NP_612044	NM_138200	FBgn0035147	---	---	---	---	---	0005975 // carbohydrate metabolic process // inferred from electronic annotation /// 0006012 // galactose metabolic process // inferred from electronic annotation /// 0006012 // galactose metabolic process // non-traceable author statement /// 0008152 // metabolic process // inferred from electronic annotation /// 0044237 // cellular metabolic process // inferred from electronic annotation	---	0003824 // catalytic activity // inferred from electronic annotation /// 0003978 // UDP-glucose 4-epimerase activity // inferred from sequence or structural similarity /// 0003978 // UDP-glucose 4-epimerase activity // non-traceable author statement /// 0003978 // UDP-glucose 4-epimerase activity // inferred from electronic annotation /// 0005488 // binding // inferred from electronic annotation …	---	IPR013120 // Male sterility C-terminal // 0.0011 /// IPR013120 // Male sterility C-terminal // 0.0019	---	---	This probe set was annotated using the Matching Probes based pipeline to a Entrez Gene identifier using 2 transcripts. // false // Matching Probes // A	AY058582(14),NM_138200(14)
1631620_at	pearson	-0.359228	-0.053736	-2.27722	-0.299622	0.0289941	0.0379816	1.14794	0.766465	1.00223	1.00223	1631620_at	1631620_at	FBgn0004507	2008-11-29	Flybase	CG7254-RA	CG7254-RA /FEA=BDGP /GEN=GlyP /DB_XREF=CG7254 FBgn0004507 /SEG=chr2L:+2123414,2129612 /MAP=22C3-22D1 /LEN=2858 /DEF=(CG7254 gene symbol:GlyP FBgn0004507 (GO:0008184 glycogen phosphorylase) (GO:0005975 carbohydrate metabolism) (GO:0004645 phosphorylase))	CG7254-RA	---	---	April 2004 (BDGP v4.0)	chr2L:2130847-2137045 (+) // 100.0 //	glycogen phosphorylase b	GlyP	---	full length	FBgn0004507	33386	A4UZZ4 /// Q9XTL9	EC:2.4.1.1	---	NP_001027219 /// NP_722762	NM_001032048 /// NM_164453	FBgn0004507	---	---	---	---	---	0005975 // carbohydrate metabolic process // inferred from electronic annotation /// 0005977 // glycogen metabolic process // inferred from electronic annotation /// 0005980 // glycogen catabolic process // inferred from mutant phenotype	0043234 // protein complex // inferred from direct assay	0004645 // phosphorylase activity // inferred from electronic annotation /// 0008184 // glycogen phosphorylase activity // inferred from direct assay /// 0008184 // glycogen phosphorylase activity // inferred from mutant phenotype /// 0016740 // transferase activity // inferred from electronic annotation /// 0016757 // transferase activity, transferring glycosyl groups // inferred from electronic…	---	---	---	---	This probe set was annotated using the Matching Probes based pipeline to a Entrez Gene identifier using 2 transcripts. // false // Matching Probes // A	NM_001032048(14),NM_164453(14)
1633272_at	pearson	-0.358359	0.0909234	-2.27091	0.508346	0.029413	0.0380417	1.15997	0.61481	0.992821	0.992821	1633272_at	1633272_at	FBgn0034497	2008-11-29	Flybase	CG9090-RA	CG9090-RA /FEA=BDGP /GEN=CG9090 /DB_XREF=CG9090 FBgn0034497 /SEG=chr2R:-15342767,15344836 /MAP=56F15-56F15 /LEN=1392 /DEF=(CG9090 gene symbol:CG9090 FBgn0034497 (GO:0005386 carrier) (GO:0005740 mitochondrial membrane))	CG9090-RA	---	---	April 2004 (BDGP v4.0)	chr2R:16166560-16168629 (-) // 100.0 //	CG9090	CG9090	---	full length	FBgn0034497	37297	Q7JUS9	---	---	NP_611468	NM_137624	FBgn0034497	---	---	---	---	---	0006810 // transport // inferred from electronic annotation /// 0006817 // phosphate transport // inferred from sequence or structural similarity	0005740 // mitochondrial envelope // inferred from sequence or structural similarity /// 0016020 // membrane // inferred from electronic annotation /// 0016021 // integral to membrane // inferred from electronic annotation	0005488 // binding // inferred from electronic annotation /// 0015114 // phosphate transmembrane transporter activity // inferred from sequence or structural similarity /// 0022857 // transmembrane transporter activity // inferred from sequence or structural similarity	---	---	---	---	This probe set was annotated using the Matching Probes based pipeline to a Entrez Gene identifier using 2 transcripts. // false // Matching Probes // A	AY121712(14),NM_137624(14)
1635479_a_at	pearson	0.357814	0.234857	2.26694	1.34526	0.0296787	0.0381604	1.1659	0.188302	0.943002	0.943002	1635479_a_at	1635479_a_at	FBgn0052056	2008-11-29	Flybase	CG32056-RA	CG32056-RA /FEA=BDGP /GEN=CG32056 /DB_XREF=CG32056 FBgn0052056 /SEG=chr3L:-10178013,10182769 /MAP=67D11-67D11 /LEN=2046 /DEF=(CG32056 gene symbol:CG32056 synonyms:(CG6590) FBgn0052056 )	CG32056-RA	---	---	April 2004 (BDGP v4.0)	chr3L:10213584-10218340 (-) // 100.0 //	CG32056	scramb1	---	full length	FBgn0052056	326186	Q8IQD7 /// Q8IQD8 /// Q9VT88	---	---	NP_648389 /// NP_729600 /// NP_729601	NM_140132 /// NM_168403 /// NM_168404	FBgn0052056	---	---	---	---	---	0006418 // tRNA aminoacylation for protein translation // inferred from electronic annotation /// 0007268 // synaptic transmission // inferred from mutant phenotype /// 0017121 // phospholipid scrambling // inferred from sequence or structural similarity	0005737 // cytoplasm // inferred from electronic annotation	0004812 // aminoacyl-tRNA ligase activity // inferred from electronic annotation /// 0005524 // ATP binding // inferred from electronic annotation /// 0017128 // phospholipid scramblase activity // inferred from sequence or structural similarity	---	---	---	---	This probe set was annotated using the Matching Probes based pipeline to a Entrez Gene identifier using 4 transcripts. // false // Matching Probes // A	AY058486(10),NM_140132(14),NM_168403(14),NM_168404(14)
1640281_s_at	pearson	0.35744	-0.0249351	2.26423	-0.138876	0.0298615	0.0382834	1.16853	0.890446	0.995344	0.995344	1640281_s_at	1640281_s_at	FBgn0035151	2008-11-29	Flybase	CG17129-RC	CG17129-RC /FEA=BDGP /GEN=CG17129 /DB_XREF=CG17129 FBgn0035151 /SEG=chr3L:-658500,660951 /MAP=61C8-61C8 /LEN=2204 /DEF=(CG17129 gene symbol:CG17129 FBgn0035151 )	CG17129-RC	---	---	April 2004 (BDGP v4.0)	chr3L:677871-680322 (-) // 100.0 //	CG17129	CG17129	---	full length	FBgn0035151	38080	Q8IHB5 /// Q95TL4 /// Q9W0P1	---	---	NP_612048 /// NP_728536 /// NP_728537	NM_138204 /// NM_167837 /// NM_167838	FBgn0035151	---	---	---	---	---	---	---	0005515 // protein binding // inferred from physical interaction	---	---	GENSCAN00000006316 // span:938-957 // numtm:1	---	This probe set was annotated using the Matching Probes based pipeline to a Entrez Gene identifier using 3 transcripts. // false // Matching Probes // A	NM_138204(14),NM_167837(14),NM_167838(14)
1626444_at	pearson	-0.357252	-0.0380189	-2.26286	-0.211833	0.0299543	0.0384317	1.16764	0.833624	1.00051	1.00051	1626444_at	1626444_at	FBgn0003062	2008-11-29	Flybase	CG9888-RA	CG9888-RA /FEA=BDGP /GEN=Fib /DB_XREF=CG9888 FBgn0003062 /SEG=chr2R:-18116458,18118288 /MAP=59C3-59C3 /LEN=1331 /DEF=(CG9888 gene symbol:Fib FBgn0003062 (GO:0006365 35S primary transcript processing) (GO:0030532 small nuclear ribonucleoprotein complex) (GO:0005732 small nucleolar ribonucleoprotein complex))	CG9888-RA	---	---	April 2004 (BDGP v4.0)	chr2R:18960413-18962243 (-) // 100.0 //	Fibrillarin	Fib	---	full length	FBgn0003062	37662	Q9W1V3	---	---	NP_523817	NM_079093	FBgn0003062	---	---	---	---	---	0006364 // rRNA processing // inferred from sequence or structural similarity /// 0006364 // rRNA processing // inferred from electronic annotation /// 0006396 // RNA processing // inferred from sequence or structural similarity	0001651 // dense fibrillar component // inferred from sequence or structural similarity /// 0005634 // nucleus // inferred from electronic annotation /// 0005730 // nucleolus // inferred from direct assay /// 0005732 // small nucleolar ribonucleoprotein complex // inferred from sequence or structural similarity /// 0015030 // Cajal body // inferred from direct assay /// 0030529 // ribonucleoprote…	0003723 // RNA binding // inferred from electronic annotation /// 0003723 // RNA binding // inferred from sequence or structural similarity /// 0003729 // mRNA binding // inferred from sequence or structural similarity /// 0005515 // protein binding // inferred from physical interaction /// 0008168 // methyltransferase activity // inferred from electronic annotation /// 0016740 // transferase act…	---	---	---	---	This probe set was annotated using the Matching Probes based pipeline to a Entrez Gene identifier using 1 transcripts. // false // Matching Probes // A	NM_079093(14)
1636639_at	pearson	-0.356984	-0.261487	-2.26092	-1.50838	0.0300865	0.0385767	1.16828	0.141582	0.919829	0.919829	1636639_at	1636639_at	FBgn0031260	2008-11-29	Flybase	CG11840-RA	CG11840-RA /FEA=BDGP /GEN=shanti /DB_XREF=CG11840 FBgn0031260 /SEG=chr2L:-544440,546292 /MAP=21D1-21D1 /LEN=1720 /DEF=(CG11840 gene symbol:shanti FBgn0031260 (GO:0042499 signal peptide peptidase))	CG11840-RA	---	---	April 2004 (BDGP v4.0)	chr2L:542775-544627 (-) // 100.0 //	shanti	Spp	---	full length	FBgn0031260	33227	Q9VPQ7	---	---	NP_523444	NM_078720	FBgn0031260	---	---	---	---	---	0007424 // open tracheal system development // inferred from mutant phenotype /// 0033619 // membrane protein proteolysis // inferred from direct assay	0005783 // endoplasmic reticulum // inferred from direct assay /// 0016021 // integral to membrane // inferred from electronic annotation	0004190 // aspartic-type endopeptidase activity // inferred from electronic annotation	---	---	FBtr0078080 // span:41-63,83-105,112-134,168-187,211-233,264-286,299-321,326-345 // numtm:8 /// NP_523444.1 // span:41-63,83-105,112-134,168-187,211-233,264-286,299-321,326-345 // numtm:8 /// AAL48184.1 // span:41-63,83-105,112-134,168-187,211-233,264-286,299-321,326-345 // numtm:8 /// FBpp0077740 // span:41-63,83-105,112-134,168-187,211-233,264-286,299-321,326-345 // numtm:8	---	This probe set was annotated using the Matching Probes based pipeline to a Entrez Gene identifier using 2 transcripts. // false // Matching Probes // A	AY070713(14),NM_078720(14)
1633224_at	pearson	0.355607	0.424312	2.25093	2.60898	0.0307737	0.0387445	1.18134	0.0138534	0.61344	0.61344	1633224_at	1633224_at	FBgn0027563	39781	Flybase	CG9631-RA	CG9631-RA /FEA=BDGP /SEG=chr3R:-10050838,10052487	CG9631-RA	---	---	April 2004 (BDGP v4.0)	chr3R:10050819-10052468 (-) // 100.0 //	CG9631	CG9631	---	full length	FBgn0027563	41729	Q9Y122	---	---	NP_650345	NM_142088	FBgn0027563	---	---	---	---	---	0006508 // proteolysis // inferred from electronic annotation /// 0006508 // proteolysis // non-traceable author statement	---	0003824 // catalytic activity // inferred from electronic annotation /// 0004252 // serine-type endopeptidase activity // inferred from electronic annotation /// 0005515 // protein binding // inferred from physical interaction /// 0008233 // peptidase activity // inferred from electronic annotation /// 0016787 // hydrolase activity // inferred from electronic annotation	---	---	---	---	This probe set was annotated using the Matching Probes based pipeline to a Entrez Gene identifier using 2 transcripts. // false // Matching Probes // A	AF145650(14),NM_142088(14)
1628659_at	pearson	-0.380339	-0.120271	-2.43296	-0.674534	0.0202256	0.0387545	1.01591	0.504971	0.988213	0.988213	1628659_at	1628659_at	FBgn0004512	2008-11-29	Flybase	CG3879-RA	CG3879-RA /FEA=BDGP /GEN=Mdr49 /DB_XREF=CG3879 FBgn0004512 /SEG=chr2R:-8005043,8011058 /MAP=49E3-49E4 /LEN=4230 /DEF=(CG3879 gene symbol:Mdr49 FBgn0004512 (GO:0008559 xenobiotic-transporting ATPase) (GO:0005887 integral to plasma membrane) (GO:0015239 multidrug transporter) (GO:0006855 multidrug transport))	CG3879-RA	---	---	April 2004 (BDGP v4.0)	chr2R:8827834-8833849 (-) // 100.0 //	Multi drug resistance 49	Mdr49	---	full length	FBgn0004512	36428	Q00449	EC:3.6.1.3	---	NP_523724	NM_079000	FBgn0004512	---	---	---	---	---	0006810 // transport // inferred from electronic annotation /// 0006855 // multidrug transport // non-traceable author statement /// 0015893 // drug transport // inferred from sequence or structural similarity	0005887 // integral to plasma membrane // non-traceable author statement /// 0016020 // membrane // inferred from electronic annotation /// 0016021 // integral to membrane // inferred from electronic annotation	0000166 // nucleotide binding // inferred from electronic annotation /// 0005515 // protein binding // inferred from physical interaction /// 0005524 // ATP binding // inferred from electronic annotation /// 0008559 // xenobiotic-transporting ATPase activity // inferred from electronic annotation /// 0015239 // multidrug transporter activity // inferred from sequence or structural similarity /// …	---	---	FBtr0087801 // span:44-66,115-137,194-216,220-239,303-325,335-357,734-756,778-800,856-878,883-902,963-985 // numtm:11 /// NP_523724.2 // span:44-66,115-137,194-216,220-239,303-325,335-357,734-756,778-800,856-878,883-902,963-985 // numtm:11 /// AAA28679.1 // span:44-66,115-137,194-216,220-239,303-325,335-357,734-756,778-800,856-878,883-902,963-985 // numtm:11 /// AAL14020.1 // span:44-66,115-137,1…	---	This probe set was annotated using the Matching Probes based pipeline to a Entrez Gene identifier using 1 transcripts. // false // Matching Probes // A	NM_079000(14)
1633821_at	pearson	-0.356916	-0.0190311	-2.26042	-0.10598	0.0301201	0.0387577	1.16511	0.916281	0.995135	0.995135	1633821_at	1633821_at	FBgn0004587	2008-11-29	Flybase	CG10851-RB	CG10851-RB /FEA=BDGP /GEN=B52 /DB_XREF=CG10851 FBgn0004587 /SEG=chr3R:+9487040,9492636 /MAP=87F7-87F7 /LEN=1658 /DEF=(CG10851 gene symbol:B52 FBgn0004587 (GO:0006376 mRNA splice site selection) (GO:0016607 nuclear speck) (GO:0008248 pre-mRNA splicing factor) (GO:0005681 spliceosome complex) (GO:0003723 RNA binding) (GO:0006371 mRNA splicing) (GO:0005634 nucleus))	CG10851-RB	---	---	April 2004 (BDGP v4.0)	chr3R:9487021-9492617 (+) // 100.0 //	Serine/arginine rich protein 55	B52	chr3-	full length	FBgn0004587	41670	P26686	---	---	NP_001014619 /// NP_788665 /// NP_788666 /// NP_788667 /// NP_788668 /// NP_788669 /// NP_788670 /// NP_788671	NM_001014619 /// NM_176488 /// NM_176489 /// NM_176490 /// NM_176491 /// NM_176492 /// NM_176493 /// NM_176494	FBgn0004587	---	---	---	---	---	0000381 // regulation of alternative nuclear mRNA splicing, via spliceosome // inferred from mutant phenotype /// 0000398 // nuclear mRNA splicing, via spliceosome // inferred from direct assay /// 0000398 // nuclear mRNA splicing, via spliceosome // non-traceable author statement /// 0006376 // mRNA splice site selection // inferred from sequence or structural similarity /// 0006397 // mRNA proc…	0005634 // nucleus // inferred by curator /// 0005634 // nucleus // inferred from direct assay /// 0005634 // nucleus // non-traceable author statement /// 0005634 // nucleus // inferred from electronic annotation /// 0016607 // nuclear speck // inferred from direct assay /// 0035062 // omega speckle // inferred from direct assay	0000166 // nucleotide binding // inferred from electronic annotation /// 0003676 // nucleic acid binding // inferred from electronic annotation /// 0003723 // RNA binding // inferred from electronic annotation /// 0003729 // mRNA binding // inferred from sequence or structural similarity /// 0003729 // mRNA binding // non-traceable author statement /// 0005515 // protein binding // inferred from …	---	---	---	---	This probe set was annotated using the Matching Probes based pipeline to a Entrez Gene identifier using 1 transcripts. // false // Matching Probes // A	NM_176491(14)
1641746_at	pearson	-0.356577	-0.341362	-2.25797	-2.02209	0.0302881	0.0388846	1.16713	0.0518696	0.787482	0.787482	1641746_at	1641746_at	FBgn0030398	2008-11-29	Flybase	CG2555-RA	CG2555-RA /FEA=BDGP /GEN=CG2555 /DB_XREF=CG2555 FBgn0030398 /SEG=chrX:+12283789,12284901 /MAP=11B1-11B1 /LEN=818 /DEF=(CG2555 gene symbol:CG2555 FBgn0030398 (GO:0008010 structural constituent of larval cuticle (sensu Insecta)))	CG2555-RA	---	---	April 2004 (BDGP v4.0)	chrX:12447162-12448274 (+) // 100.0 //	CG2555	Cpr11B	---	full length	FBgn0030398	32203	Q9VYM0	---	---	NP_572807	NM_132579	FBgn0030398	---	---	---	---	---	---	---	0005214 // structural constituent of chitin-based cuticle // inferred from sequence or structural similarity /// 0008010 // structural constituent of chitin-based larval cuticle // inferred from sequence or structural similarity /// 0042302 // structural constituent of cuticle // inferred from electronic annotation	---	---	---	---	This probe set was annotated using the Matching Probes based pipeline to a Entrez Gene identifier using 2 transcripts. // false // Matching Probes // A	AY060775(14),NM_132579(14)
1634216_at	pearson	-0.355517	-0.084225	-2.25028	-0.470617	0.0308186	0.0389857	1.17858	0.641209	0.996251	0.996251	1634216_at	1634216_at	FBgn0038173	2008-11-29	Flybase	CG9345-RA	CG9345-RA /FEA=BDGP /SEG=chr3R:+9532497,9534873	CG9345-RA	---	---	April 2004 (BDGP v4.0)	chr3R:9532478-9534854 (+) // 100.0 //	Adenosine deaminase-related growth factor C	Adgf-C	---	full length	FBgn0038173	41680	A9UNB3 /// Q9VFS0	EC:3.5.4.4	---	NP_650308	NM_142051	FBgn0038173	---	---	---	---	---	0009168 // purine ribonucleoside monophosphate biosynthetic process // inferred from electronic annotation	0005576 // extracellular region // inferred from sequence or structural similarity	0004000 // adenosine deaminase activity // non-traceable author statement /// 0004000 // adenosine deaminase activity // inferred from electronic annotation /// 0008083 // growth factor activity // inferred from sequence or structural similarity /// 0008083 // growth factor activity // non-traceable author statement /// 0016787 // hydrolase activity // inferred from electronic annotation /// 0019…	---	---	---	---	This probe set was annotated using the Matching Probes based pipeline to a Entrez Gene identifier using 2 transcripts. // false // Matching Probes // A	AF337552(14),NM_142051(14)
1635972_at	pearson	0.355509	0.465466	2.25022	2.92815	0.0308227	0.0392268	1.17429	0.00633946	0.467176	0.467176	1635972_at	1635972_at	FBgn0035532	2008-11-29	Flybase	CG15014-RA	CG15014-RA /FEA=BDGP /GEN=CG15014 /DB_XREF=CG15014 FBgn0035532 /SEG=chr3L:-4301730,4302856 /MAP=64B2-64B2 /LEN=1126 /DEF=(CG15014 gene symbol:CG15014 FBgn0035532 )	CG15014-RA	---	---	April 2004 (BDGP v4.0)	chr3L:4321104-4322230 (-) // 100.0 //	CG15014	CG15014	---	full length	FBgn0035532	38533	Q9VZD8	---	---	NP_647892	NM_139635	FBgn0035532	---	---	---	---	---	---	---	---	---	---	---	---	This probe set was annotated using the Matching Probes based pipeline to a Entrez Gene identifier using 2 transcripts. // false // Matching Probes // A	AY118476(14),NM_139635(14)
1623148_at	pearson	0.355314	0.025355	2.24881	0.141216	0.0309214	0.0393822	1.17362	0.888613	0.995609	0.995609	1623148_at	1623148_at	FBgn0030859	2008-11-29	Flybase	CG12990-RA	CG12990-RA /FEA=BDGP /GEN=CG12990 /DB_XREF=CG12990 FBgn0030859 /SEG=chrX:-17400166,17402847 /MAP=16B12-16B12 /LEN=2330 /DEF=(CG12990 gene symbol:CG12990 FBgn0030859 )	CG12990-RA	---	---	April 2004 (BDGP v4.0)	chrX:17563240-17565921 (-) // 100.0 //	CG12990	CG12990	---	full length	FBgn0030859	32747	Q9VX29	---	---	NP_573233	NM_133005	FBgn0030859	---	---	---	---	---	---	---	0016747 // transferase activity, transferring groups other than amino-acyl groups // inferred from electronic annotation	---	IPR002656 // Acyltransferase 3 // 2.9E-4 /// IPR002656 // Acyltransferase 3 // 2.9E-4	FBtr0074479 // span:198-220,251-273,293-315,340-362,389-411,435-454,474-493,506-524,534-556,587-606,616-638 // numtm:11 /// NP_573233.1 // span:198-220,251-273,293-315,340-362,389-411,435-454,474-493,506-524,534-556,587-606,616-638 // numtm:11 /// AAL48935.1 // span:198-220,251-273,293-315,340-362,389-411,435-454,474-493,506-524,534-556,587-606,616-638 // numtm:11 /// GENSCAN00000007942 // span:1…	---	This probe set was annotated using the Matching Probes based pipeline to a Entrez Gene identifier using 2 transcripts. // false // Matching Probes // A	AY071313(14),NM_133005(14)
1639476_at	pearson	-0.355224	-0.211022	-2.24815	-1.20199	0.0309671	0.0396002	1.17095	0.238471	0.957677	0.957677	1639476_at	1639476_at	FBgn0030262	2008-11-29	Flybase	CG2081-RB	CG2081-RB /FEA=BDGP /GEN=CG2081 /DB_XREF=CG2081 FBgn0030262 /SEG=chrX:+10831228,10832049 /MAP=10A4-10A4 /LEN=687 /DEF=(CG2081 gene symbol:CG2081 FBgn0030262 )	CG2081-RB	---	---	April 2004 (BDGP v4.0)	chrX:10983322-10984143 (+) // 100.0 //	Vago	Vago	---	full length	FBgn0030262	32040	Q8MYS7 /// Q9VZ35	---	---	NP_001033840 /// NP_572680	NM_001038751 /// NM_132452	FBgn0030262	---	---	---	---	---	---	---	---	---	---	FBtr0073427 // span:7-26 // numtm:1 /// FBtr0100644 // span:7-26 // numtm:1 /// NP_001033840.1 // span:7-26 // numtm:1 /// NP_572680.1 // span:7-26 // numtm:1 /// AAM29632.1 // span:7-26 // numtm:1 /// GENSCAN00000012826 // span:269-288,308-330,342-364,374-396,403-420,425-447,454-476 // numtm:7 /// FBpp0073283 // span:7-26 // numtm:1 /// FBpp0100105 // span:7-26 // numtm:1	---	This probe set was annotated using the Matching Probes based pipeline to a Entrez Gene identifier using 3 transcripts. // false // Matching Probes // A	AY113627(14),NM_001038751(14),NM_132452(14)
1632575_at	pearson	-0.355106	0.0242154	-2.2473	0.134865	0.0310267	0.0397671	1.16883	0.893591	0.994454	0.994454	1632575_at	1632575_at	FBgn0085205	2008-11-29	Flybase	CT35481	CT35481 /FEA=sim4 /SEG=chr2L:+3996699,3996951	CT35481	---	---	April 2004 (BDGP v4.0)	chr2L:4004130-4004382 (+) // 100.0 //	---	CG34176	---	full length	FBgn0085205	5740391	A2VEL0 /// A8DYU5	---	---	NP_001097076	NM_001103606	FBgn0085205	---	---	---	---	---	---	---	---	---	---	---	---	This probe set was annotated using the Matching Probes based pipeline to a Entrez Gene identifier using 1 transcripts. // false // Matching Probes // A	NM_001103606(14)
1634866_at	pearson	0.354251	-0.00460757	2.24112	-0.0256541	0.0314624	0.0399	1.17646	0.979698	0.998993	0.998993	1634866_at	1634866_at	FBgn0030803	2008-11-29	Flybase	CG4880-RA	CG4880-RA /FEA=BDGP /GEN=CG4880 /DB_XREF=CG4880 FBgn0030803 /SEG=chrX:+16617849,16619749 /MAP=15B4-15B4 /LEN=1688 /DEF=(CG4880 gene symbol:CG4880 FBgn0030803 )	CG4880-RA	---	---	April 2004 (BDGP v4.0)	chrX:16780862-16782762 (+) // 100.0 //	CG4880	CG4880	---	full length	FBgn0030803	32680	Q9VX97	---	---	NP_573177	NM_132949	FBgn0030803	---	---	---	---	---	---	---	0005515 // protein binding // inferred from physical interaction	---	---	FBtr0074342 // span:64-83 // numtm:1 /// NP_573177.1 // span:64-83 // numtm:1 /// AAO25025.2 // span:64-83 // numtm:1 /// FBpp0074116 // span:64-83 // numtm:1	---	This probe set was annotated using the Matching Probes based pipeline to a Entrez Gene identifier using 2 transcripts. // false // Matching Probes // A	BT003268(14),NM_132949(14)
1624262_at	pearson	-0.354999	-0.173231	-2.24653	-0.979315	0.0310808	0.0399327	1.16651	0.335005	0.957863	0.957863	1624262_at	1624262_at	FBgn0013725	2008-11-29	Flybase	CG10108-RA	CG10108-RA /FEA=BDGP /GEN=phyl /DB_XREF=CG10108 FBgn0013725 /SEG=chr2R:-9491061,9496061 /MAP=51A2-51A2 /LEN=1837 /DEF=(CG10108 gene symbol:phyl FBgn0013725 (GO:0016360 determination of sensory organ precursor cell fate) (GO:0007265 RAS protein signal transduction) (GO:0007462 R1R6 cell fate commitment) (GO:0045467 R7 development) (GO:0007465 R7 cell fate commitment) (GO:0008052 sensory organ dete…	CG10108-RA	---	---	April 2004 (BDGP v4.0)	chr2R:10314840-10319840 (-) // 100.0 //	phyllopod	phyl	chr2-	full length	FBgn0013725	36606	Q27934	---	---	NP_725394	NM_166055	FBgn0013725	---	---	---	---	---	0007049 // cell cycle // inferred from electronic annotation /// 0007219 // Notch signaling pathway // inferred from electronic annotation /// 0007265 // Ras protein signal transduction // inferred from genetic interaction /// 0007422 // peripheral nervous system development // inferred from mutant phenotype /// 0007462 // R1/R6 cell fate commitment // inferred from expression pattern /// 0007462…	0005634 // nucleus // inferred from direct assay /// 0005634 // nucleus // inferred from sequence or structural similarity /// 0005634 // nucleus // inferred from electronic annotation	0005515 // protein binding // inferred from physical interaction /// 0008270 // zinc ion binding // inferred from electronic annotation /// 0060090 // molecular adaptor activity // inferred from direct assay	---	---	---	---	This probe set was annotated using the Matching Probes based pipeline to a Entrez Gene identifier using 2 transcripts. // false // Matching Probes // A	AY075531(12),NM_166055(14)
1628847_a_at	pearson	-0.353875	-0.042529	-2.23839	-0.237006	0.0316562	0.0400151	1.17934	0.814211	1.00076	1.00076	1628847_a_at	1628847_a_at	FBgn0039941	2008-11-29	Flybase	CG40146-RA	CG40146-RA /FEA=BDGP /GEN=CG40146 /DB_XREF=CG40146 FBgn0058146 /SEG=chrXh:-125308,137131 /LEN=1621 /DEF=(CG40146 gene symbol:CG40146 FLAGGED_PROBLEMATIC FBgn0058146 )	CG40146-RA	---	---	April 2004 (BDGP v4.0)	chrXHet:47120-58943 (+) // 100.0 //	CG40146	CG17167	---	full length	FBgn0039941	3354991	A2VEW9 /// Q7PLW4	---	---	NP_001015256 /// NP_001015257	NM_001015256 /// NM_001015257	FBgn0039941	---	---	---	---	---	---	0016021 // integral to membrane // inferred from electronic annotation	0008273 // calcium, potassium:sodium antiporter activity // inferred from sequence or structural similarity	---	---	NP_001015257.1 // span:81-100,124-146,153-175,247-266,279-301,311-333,340-362,382-404,411-433 // numtm:9 /// NP_001015256.1 // span:80-99,123-145,152-174,246-265,278-300,310-332,339-361,381-403,410-432 // numtm:9 /// ABN49427.1 // span:112-131,144-166,176-198,205-227,247-269,276-298 // numtm:6 /// GENSCAN00000006209 // span:125-144,197-219,380-402,406-425,446-468,488-510,517-539 // numtm:7 /// FB…	---	This probe set was annotated using the Matching Probes based pipeline to a Entrez Gene identifier using 2 transcripts. // false // Matching Probes // A	NM_001015256(14),NM_001015257(14)
1641539_a_at	pearson	-0.353708	-0.25042	-2.23719	-1.44017	0.031742	0.0401639	1.17819	0.159844	0.931206	0.931206	1641539_a_at	1641539_a_at	FBgn0039703	2008-11-29	Flybase	CG7829-RB	CG7829-RB /FEA=BDGP /GEN=CG7829 /DB_XREF=CG7829 FBgn0039703 /SEG=chr3R:-25632208,25632852 /MAP=99C2-99C2 /LEN=644 /DEF=(CG7829 gene symbol:CG7829 FBgn0039703 (GO:0004295 trypsin))	CG7829-RB	---	---	April 2004 (BDGP v4.0)	chr3R:25642842-25643486 (-) // 100.0 //	CG7829	CG7829	---	full length	FBgn0039703	43522	Q8IMK3 /// Q9VAG3	EC:3.4.21.4	---	NP_651732 /// NP_733310	NM_143475 /// NM_170431	FBgn0039703	---	---	---	---	---	0006508 // proteolysis // inferred from electronic annotation /// 0006508 // proteolysis // non-traceable author statement	---	0003824 // catalytic activity // inferred from electronic annotation /// 0004252 // serine-type endopeptidase activity // inferred from electronic annotation /// 0016787 // hydrolase activity // inferred from electronic annotation	---	IPR001254 // Peptidase S1 and S6, chymotrypsin/Hap // 1.4E-29	---	---	This probe set was annotated using the Matching Probes based pipeline to a Entrez Gene identifier using 3 transcripts. // false // Matching Probes // A	AY113573(13),NM_143475(14),NM_170431(14)
1641508_s_at	pearson	0.353421	0.344318	2.23511	2.04194	0.0318908	0.0402966	1.17938	0.0497446	0.782277	0.782277	1641508_s_at	1641508_s_at	FBgn0033129	2008-11-29	Flybase	CG12844-RA	CG12844-RA /FEA=BDGP /GEN=Tsp42Eh /DB_XREF=CG12844 FBgn0033129 /SEG=chr2R:+2094464,2095821 /MAP=42E5-42E5 /LEN=1068 /DEF=(CG12844 gene symbol:Tsp42Eh FBgn0033129 (GO:0016021 integral to membrane))	CG12844-RA	---	---	April 2004 (BDGP v4.0)	chr2R:2921067-2922424 (+) // 100.0 //	tetraspanin 42E	Tsp42Eh	---	full length	FBgn0033129	35617	A1Z6T8 /// Q0E9M6 /// Q8SXU7	---	---	NP_523634 /// NP_724527 /// NP_724528	NM_078910 /// NM_165505 /// NM_165506	FBgn0033129	---	---	---	---	---	---	0016020 // membrane // inferred from electronic annotation /// 0016021 // integral to membrane // inferred from electronic annotation /// 0016021 // integral to membrane // inferred from sequence or structural similarity	---	---	IPR000301 // CD9/CD37/CD63 antigen // 3.3E-7	FBtr0089026 // span:7-29,52-74,81-103,198-220 // numtm:4 /// FBtr0089027 // span:10-32,39-61,156-178 // numtm:3 /// FBtr0089025 // span:10-32,39-61,156-178 // numtm:3 /// NP_724527.1 // span:10-32,39-61,156-178 // numtm:3 /// NP_523634.1 // span:7-29,52-74,81-103,198-220 // numtm:4 /// NP_724528.1 // span:10-32,39-61,156-178 // numtm:3 /// AAL89865.1 // span:10-32,39-61 // numtm:2 /// GENSCAN0000…	---	This probe set was annotated using the Matching Probes based pipeline to a Entrez Gene identifier using 3 transcripts. // false // Matching Probes // A	NM_078910(14),NM_165505(14),NM_165506(14)
1624686_a_at	pearson	-0.385137	0.0907787	-2.46896	0.50753	0.0185775	0.0403699	1.00299	0.615375	0.993099	0.993099	1624686_a_at	1624686_a_at	FBgn0000479	2008-11-29	Flybase	CG32498-RO	CG32498-RO /FEA=BDGP /GEN=dnc /DB_XREF=CG32498 FBgn0000479 /SEG=chrX:+2934879,3097743 /MAP=3C9-3D1 /LEN=4069 /DEF=(CG32498 gene symbol:dnc synonyms:(CG14268 CG14267 CG10797 CG10792 CG10791) FBgn0000479 (GO:0008355 olfactory learning) (GO:0000003 reproduction) (GO:0019933 cAMP-mediated signaling) (GO:0007610 behavior) (GO:0007611 learning andor memory) (GO:0007612 learning) (GO:0007292 oogenesis) …	CG32498-RO	---	---	April 2004 (BDGP v4.0)	chrX:3070474-3233338 (+) // 100.0 //	dunce	dnc	chr1-3.9	full length	FBgn0000479	31309	P12252 /// Q1WWF0 /// Q8IRU4 /// Q8MS17 /// Q9W4S9 /// Q9W4T0 /// Q9W4T4	EC:3.1.4.17	---	NP_525061 /// NP_726846 /// NP_726847 /// NP_726849 /// NP_726850 /// NP_726851 /// NP_726852 /// NP_726853 /// NP_726854 /// NP_726855 /// NP_726856 /// NP_726857 /// NP_726858 /// NP_726859	NM_080322 /// NM_166959 /// NM_166960 /// NM_166961 /// NM_166962 /// NM_166963 /// NM_166964 /// NM_166965 /// NM_166966 /// NM_166967 /// NM_166968 /// NM_166969 /// NM_166970 /// NM_166971	FBgn0000479	---	---	---	---	---	0000003 // reproduction // non-traceable author statement /// 0007165 // signal transduction // inferred from electronic annotation /// 0007268 // synaptic transmission // inferred from mutant phenotype /// 0007610 // behavior // traceable author statement /// 0007611 // learning or memory // non-traceable author statement /// 0007611 // learning or memory // traceable author statement /// 000761…	---	0003824 // catalytic activity // inferred from electronic annotation /// 0004114 // 3',5'-cyclic-nucleotide phosphodiesterase activity // non-traceable author statement /// 0004114 // 3',5'-cyclic-nucleotide phosphodiesterase activity // inferred from electronic annotation /// 0004115 // 3',5'-cyclic-AMP phosphodiesterase activity // inferred from sequence or structural similarity /// 0004115 // …	---	---	---	---	This probe set was annotated using the Matching Probes based pipeline to a Entrez Gene identifier using 14 transcripts. // false // Matching Probes // A	NM_080322(14),NM_166959(14),NM_166960(14),NM_166961(14),NM_166962(14),NM_166963(14),NM_166964(14),NM_166965(14),NM_166966(14),NM_166967(14),NM_166968(14),NM_166969(14),NM_166970(14),NM_166971(14)
1632207_a_at	pearson	-0.353188	-0.153344	-2.23342	-0.864003	0.0320119	0.0404394	1.17953	0.394223	0.974791	0.974791	1632207_a_at	1632207_a_at	FBgn0035101	2008-11-29	Flybase	CG1212-RA	CG1212-RA /FEA=BDGP /GEN=p130CAS /DB_XREF=CG1212 FBgn0035101 /SEG=chr3L:+141439,155158 /MAP=61B1-61B2 /LEN=3444 /DEF=(CG1212 gene symbol:p130CAS FBgn0035101 (GO:0007016 cytoskeletal anchoring) (GO:0005925 focal adhesion) (GO:0016343 cytoskeletal anchor protein))	CG1212-RA	---	---	April 2004 (BDGP v4.0)	chr3L:160809-174524 (+) // 99.88 //	p130CAS	p130CAS	---	full length	FBgn0035101	38021	A4IJ58 /// A8JNG5 /// Q058V8 /// Q7KVE5 /// Q95U71	---	---	NP_001097456 /// NP_612002 /// NP_728478	NM_001103986 /// NM_138158 /// NM_167797	FBgn0035101	---	---	---	---	---	0007016 // cytoskeletal anchoring at plasma membrane // inferred from sequence or structural similarity	0005925 // focal adhesion // inferred from sequence or structural similarity	0005515 // protein binding // inferred from physical interaction	---	---	---	---	This probe set was annotated using the Matching Probes based pipeline to a Entrez Gene identifier using 5 transcripts. // false // Matching Probes // A	AY058273(14),EF599121(14),NM_001103986(14),NM_138158(14),NM_167797(14)
1635494_at	pearson	0.385526	0.400465	2.47188	2.43334	0.018449	0.0405887	1.00141	0.0209219	0.670564	0.670564	1635494_at	1635494_at	FBgn0000165	39781	Flybase	CG5779-RA	CG5779-RA /FEA=BDGP /GEN=Bc /DB_XREF=CG5779 FBgn0000165 /SEG=chr2R:-12950937,12953697 /MAP=54F6-54F6 /LEN=2344 /DEF=(CG5779 gene symbol:Bc FBgn0000165 (GO:0006952 defense response) (GO:0004503 monophenol monooxygenase))	CG5779-RA	---	---	April 2004 (BDGP v4.0)	chr2R:13774717-13777477 (-) // 100.0 //	Black Cell	Bc	chr2-80.6	full length	FBgn0000165	37044	Q27598 /// Q7K2W6 /// Q9GV29	EC:1.14.18.1	---	NP_476812	NM_057464	FBgn0000165	---	---	---	---	---	0006810 // transport // inferred from electronic annotation /// 0006952 // defense response // non-traceable author statement /// 0008152 // metabolic process // inferred from electronic annotation /// 0009608 // response to symbiont // inferred from mutant phenotype /// 0009611 // response to wounding // inferred from mutant phenotype /// 0035006 // melanization defense response // inferred from…	---	0004503 // monophenol monooxygenase activity // inferred from sequence or structural similarity /// 0004503 // monophenol monooxygenase activity // non-traceable author statement /// 0004503 // monophenol monooxygenase activity // traceable author statement /// 0004503 // monophenol monooxygenase activity // inferred from electronic annotation /// 0005344 // oxygen transporter activity // inferre…	---	---	---	---	This probe set was annotated using the Matching Probes based pipeline to a Entrez Gene identifier using 2 transcripts. // false // Matching Probes // A	AY060617(14),NM_057464(14)
1640599_at	pearson	-0.352974	-0.31113	-2.23188	-1.82277	0.032123	0.0406103	1.17932	0.0779971	0.857798	0.857798	1640599_at	1640599_at	FBgn0020513	2008-11-29	Flybase	CG3989-RA	CG3989-RA /FEA=BDGP /GEN=ade5 /DB_XREF=CG3989 FBgn0020513 /SEG=chrX:-12488401,12491278 /MAP=11B16-11B16 /LEN=1845 /DEF=(CG3989 gene symbol:ade5 FBgn0020513 (GO:0004638 phosphoribosylaminoimidazole carboxylase) (GO:0004639 phosphoribosylaminoimidazole-succinocarboxamide synthase))	CG3989-RA	---	---	April 2004 (BDGP v4.0)	chrX:12651774-12654651 (-) // 100.0 //	AIR-carboxylase-SAICAR synthetase	ade5	chr1-	full length	FBgn0020513	32228	Q9I7S8	EC:4.1.1.21 /// EC:6.3.2.6	---	NP_572826	NM_132598	FBgn0020513	---	---	---	---	---	0006164 // purine nucleotide biosynthetic process // inferred from electronic annotation /// 0006189 // 'de novo' IMP biosynthetic process // inferred from electronic annotation /// 0009113 // purine base biosynthetic process // inferred from genetic interaction	0009320 // phosphoribosylaminoimidazole carboxylase complex // inferred from electronic annotation	0003824 // catalytic activity // inferred from electronic annotation /// 0004638 // phosphoribosylaminoimidazole carboxylase activity // inferred from sequence or structural similarity /// 0004638 // phosphoribosylaminoimidazole carboxylase activity // inferred from electronic annotation /// 0004638 // phosphoribosylaminoimidazole carboxylase activity // traceable author statement /// 0004639 // …	---	---	---	---	This probe set was annotated using the Matching Probes based pipeline to a Entrez Gene identifier using 2 transcripts. // false // Matching Probes // A	AF102579(13),NM_132598(14)
1635198_at	pearson	-0.352888	-0.163085	-2.23126	-0.92034	0.0321681	0.0407694	1.1767	0.364502	0.963606	0.963606	1635198_at	1635198_at	FBgn0035649	2008-11-29	Flybase	CG10483-RA	CG10483-RA /FEA=BDGP /GEN=CG10483 /DB_XREF=CG10483 FBgn0035649 /SEG=chr3L:-5877210,5880606 /MAP=64F5-64F5 /LEN=2222 /DEF=(CG10483 gene symbol:CG10483 FBgn0035649 )	CG10483-RA	---	---	April 2004 (BDGP v4.0)	chr3L:5911002-5914398 (-) // 100.0 //	CG10483	CG10483	---	full length	FBgn0035649	38666	Q9VRR2	---	---	NP_648000	NM_139743	FBgn0035649	---	---	---	---	---	---	0016021 // integral to membrane // inferred from electronic annotation	0005515 // protein binding // inferred from physical interaction	---	---	FBtr0077077 // span:229-251,261-283,310-327,331-353,366-388,423-445,458-480,495-513 // numtm:8 /// NP_648000.1 // span:229-251,261-283,310-327,331-353,366-388,423-445,458-480,495-513 // numtm:8 /// AAK93042.1 // span:229-251,261-283,310-327,331-353,366-388,423-445,458-480,495-513 // numtm:8 /// GENSCAN00000012252 // span:229-251,261-283,310-327,331-353,366-388,423-445,458-480,495-513 // numtm:8 /…	---	This probe set was annotated using the Matching Probes based pipeline to a Entrez Gene identifier using 2 transcripts. // false // Matching Probes // A	AY051618(14),NM_139743(14)
1624989_s_at	pearson	-0.352728	-0.274876	-2.23011	-1.59176	0.0322514	0.0409727	1.17549	0.121586	0.911305	0.911305	1624989_s_at	1624989_s_at	FBgn0000557	2008-11-29	Flybase	CG1873-RA	CG1873-RA /FEA=BDGP /GEN=Ef1alpha100E /DB_XREF=CG1873 FBgn0000557 /SEG=chr3R:+27553555,27558394 /MAP=100C1-100C2 /LEN=2606 /DEF=(CG1873 gene symbol:Ef1alpha100E FBgn0000557 (GO:0005737 cytoplasm) (GO:0005853 eukaryotic translation elongation factor 1 complex) (GO:0006414 translational elongation) (GO:0003746 translation elongation factor) (GO:0016147 protein-synthesizing GTPase, elongation))	CG1873-RA	---	---	April 2004 (BDGP v4.0)	chr3R:27564189-27569028 (+) // 100.0 //	elongation factor 1-alpha F2	Ef1alpha100E	---	full length	FBgn0000557	43736	A4V3Q6 /// P05303	---	---	NP_524611 /// NP_733449 /// NP_996315 /// NP_996316	NM_079872 /// NM_170570 /// NM_206592 /// NM_206593	FBgn0000557	---	---	---	---	---	0006412 // translation // non-traceable author statement /// 0006412 // translation // inferred from electronic annotation /// 0006414 // translational elongation // inferred from electronic annotation /// 0006414 // translational elongation // inferred from sequence or structural similarity /// 0006414 // translational elongation // non-traceable author statement	0005737 // cytoplasm // non-traceable author statement /// 0005737 // cytoplasm // inferred from electronic annotation /// 0005811 // lipid particle // inferred from direct assay /// 0005853 // eukaryotic translation elongation factor 1 complex // inferred from sequence or structural similarity	0000166 // nucleotide binding // inferred from electronic annotation /// 0003746 // translation elongation factor activity // inferred from sequence or structural similarity /// 0003746 // translation elongation factor activity // non-traceable author statement /// 0003746 // translation elongation factor activity // inferred from electronic annotation /// 0003924 // GTPase activity // inferred f…	---	---	---	---	This probe set was annotated using the Matching Probes based pipeline to a Entrez Gene identifier using 5 transcripts. // false // Matching Probes // A	BT015202(14),NM_079872(14),NM_170570(14),NM_206592(14),NM_206593(14)
1632591_at	pearson	0.352391	0.082584	2.22767	0.461384	0.0324285	0.0410479	1.17769	0.647744	0.996286	0.996286	1632591_at	1632591_at	FBgn0035089	2008-11-29	Flybase	CG9358-RA	CG9358-RA /FEA=BDGP /GEN=CG9358 /DB_XREF=CG9358 FBgn0035089 /SEG=chr2R:-20014412,20015412 /MAP=60E10-60E10 /LEN=543 /DEF=(CG9358 gene symbol:CG9358 FBgn0035089 )	CG9358-RA	---	---	April 2004 (BDGP v4.0)	chr2R:20858365-20859365 (-) // 100.0 //	Pherokine 3	Phk-3	---	full length	FBgn0035089	37997	Q9W0X2	---	---	NP_611990	NM_138146	FBgn0035089	---	---	---	---	---	0006468 // protein amino acid phosphorylation // non-traceable author statement /// 0007165 // signal transduction // inferred from mutant phenotype /// 0007265 // Ras protein signal transduction // traceable author statement /// 0007283 // spermatogenesis // inferred from mutant phenotype /// 0007362 // terminal region determination // inferred from mutant phenotype /// 0007362 // terminal regio…	0005737 // cytoplasm // traceable author statement /// 0019897 // extrinsic to plasma membrane // traceable author statement	0004672 // protein kinase activity // non-traceable author statement /// 0004674 // protein serine/threonine kinase activity // inferred from sequence or structural similarity /// 0004674 // protein serine/threonine kinase activity // non-traceable author statement /// 0019992 // diacylglycerol binding // inferred from sequence or structural similarity	---	---	---	---	This probe set was annotated using the Matching Probes based pipeline to a Entrez Gene identifier using 2 transcripts. // false // Matching Probes // A	AY071015(14),NM_138146(14)
1638811_at	pearson	-0.352083	-0.266555	-2.22545	-1.53983	0.0325907	0.0411912	1.17934	0.133749	0.91177	0.91177	1638811_at	1638811_at	FBgn0036191	2008-11-29	Flybase	CG7334-RA	CG7334-RA /FEA=BDGP /GEN=CG7334 /DB_XREF=CG7334 FBgn0036191 /SEG=chr3L:+11641531,11646373 /MAP=68D2-68D2 /LEN=2782 /DEF=(CG7334 gene symbol:CG7334 FBgn0036191 )	CG7334-RA	---	---	April 2004 (BDGP v4.0)	chr3L:11677083-11681925 (+) // 100.0 //	Sugar-baby	Sug	---	full length	FBgn0036191	39314	Q7KUF9 /// Q86PB0 /// Q95S75 /// Q9VTL9	---	---	NP_648493 /// NP_996057	NM_140236 /// NM_206335	FBgn0036191	---	---	---	---	---	0006810 // transport // inferred from electronic annotation /// 0008340 // determination of adult life span // inferred from mutant phenotype	0016021 // integral to membrane // inferred from electronic annotation	0005215 // transporter activity // inferred from electronic annotation /// 0005515 // protein binding // inferred from physical interaction	---	IPR011701 // Major facilitator superfamily MFS_1 // 9.3E-8 /// IPR011701 // Major facilitator superfamily MFS_1 // 8.6E-9 /// IPR011701 // Major facilitator superfamily MFS_1 // 8.6E-9 /// IPR011701 // Major facilitator superfamily MFS_1 // 4.2E-8	FBtr0076109 // span:15-37,44-66,232-254,266-283,296-313,342-364,384-406,409-431,441-463,475-497,507-526 // numtm:11 /// FBtr0076110 // span:15-37,44-66,232-254,266-283,298-320,363-385,405-427,430-452,462-484,496-518,528-547 // numtm:11 /// NP_996057.1 // span:15-37,44-66,232-254,266-283,298-320,363-385,405-427,430-452,462-484,496-518,528-547 // numtm:11 /// NP_648493.2 // span:15-37,44-66,232-254…	---	This probe set was annotated using the Matching Probes based pipeline to a Entrez Gene identifier using 2 transcripts. // false // Matching Probes // A	NM_140236(14),NM_206335(14)
1633060_at	pearson	-0.351925	0.215564	-2.22431	1.22911	0.0326741	0.0413484	1.17813	0.228281	0.957906	0.957906	1633060_at	1633060_at	FBgn0033696	2008-11-29	Flybase	CG8859-RA	CG8859-RA /FEA=BDGP /GEN=Cyp6g2 /DB_XREF=CG8859 FBgn0033696 /SEG=chr2R:-7253464,7255075 /MAP=48E7-48E7 /LEN=1560 /DEF=(CG8859 gene symbol:Cyp6g2 FBgn0033696 (GO:0015034 cytochrome P450) (GO:0005792 microsome) (GO:0016020 membrane))	CG8859-RA	---	---	April 2004 (BDGP v4.0)	chr2R:8076256-8077867 (-) // 100.0 //	Cyp6g2	Cyp6g2	---	full length	FBgn0033696	36317	Q9V675	---	---	NP_610744	NM_136900	FBgn0033696	---	---	---	---	---	0055114 // oxidation reduction // inferred from electronic annotation	0005783 // endoplasmic reticulum // inferred from electronic annotation /// 0005789 // endoplasmic reticulum membrane // inferred from electronic annotation /// 0005792 // microsome // non-traceable author statement /// 0005792 // microsome // inferred from electronic annotation /// 0016020 // membrane // non-traceable author statement /// 0016020 // membrane // inferred from electronic annotation	0004497 // monooxygenase activity // inferred from electronic annotation /// 0005506 // iron ion binding // inferred from electronic annotation /// 0009055 // electron carrier activity // inferred from electronic annotation /// 0009055 // electron carrier activity // inferred from sequence or structural similarity /// 0009055 // electron carrier activity // non-traceable author statement /// 0016…	---	---	FBtr0088009 // span:5-27 // numtm:1 /// NP_610744.1 // span:5-27 // numtm:1 /// AAR88134.1 // span:5-27 // numtm:1 /// ABX00719.1 // span:5-27 // numtm:1 /// GENSCAN00000002464 // span:5-27 // numtm:1 /// FBpp0087117 // span:5-27 // numtm:1	---	This probe set was annotated using the Matching Probes based pipeline to a Entrez Gene identifier using 2 transcripts. // false // Matching Probes // A	BT031097(14),NM_136900(14)
1625255_at	pearson	-0.351881	-0.10377	-2.22399	-0.580905	0.0326972	0.0415861	1.17477	0.565504	0.988629	0.988629	1625255_at	1625255_at	FBgn0031735	2008-11-29	Flybase	CG11029-RA	CG11029-RA /FEA=BDGP /GEN=CG11029 /DB_XREF=CG11029 FBgn0031735 /SEG=chr2L:+5738491,5739835 /MAP=25F4-25F4 /LEN=1344 /DEF=(CG11029 gene symbol:CG11029 FBgn0031735 (GO:0004622 lysophospholipase))	CG11029-RA	---	---	April 2004 (BDGP v4.0)	chr2L:5746276-5747620 (+) // 100.0 //	CG11029	CG11029	---	full length	FBgn0031735	33804	Q9VMM8	EC:3.1.1.5	---	NP_608955	NM_135111	FBgn0031735	---	---	---	---	---	0006629 // lipid metabolic process // inferred from electronic annotation	---	0004622 // lysophospholipase activity // inferred from sequence or structural similarity /// 0004622 // lysophospholipase activity // inferred from electronic annotation /// 0016787 // hydrolase activity // inferred from electronic annotation /// 0016788 // hydrolase activity, acting on ester bonds // inferred from electronic annotation	---	---	FBtr0079136 // span:4-23 // numtm:1 /// NP_608955.1 // span:4-23 // numtm:1 /// GENSCAN00000000146 // span:4-23 // numtm:1 /// FBpp0078767 // span:4-23 // numtm:1	---	This probe set was annotated using the Matching Probes based pipeline to a Entrez Gene identifier using 1 transcripts. // false // Matching Probes // A	NM_135111(14)
1631875_at	pearson	0.382277	0.405578	2.44747	2.47047	0.0195456	0.0415874	1.0068	0.0191973	0.663753	0.663753	1631875_at	1631875_at	FBgn0037321	2008-11-29	Flybase	CG1172-RA	CG1172-RA /FEA=BDGP /GEN=CG1172 /DB_XREF=CG1172 FBgn0037321 /SEG=chr3R:+1219646,1222908 /MAP=83A1-83A1 /LEN=2012 /DEF=(CG1172 gene symbol:CG1172 FBgn0037321 )	CG1172-RA	---	---	April 2004 (BDGP v4.0)	chr3R:1219649-1222911 (+) // 100.0 //	CG1172 /// CG1172	CG1172 /// DbuzCG1172	---	full length	FBgn0037321	40647	Q9VNB2	---	---	NP_649534	NM_141277	FBgn0037321 /// FBgn0068891	---	---	---	---	---	0006464 // protein modification process // inferred from electronic annotation	---	---	---	---	---	---	This probe set was annotated using the Matching Probes based pipeline to a Entrez Gene identifier using 2 transcripts. // false // Matching Probes // A	AY084174(14),NM_141277(14)
1632818_at	pearson	-0.351401	-0.0708408	-2.22053	-0.395418	0.0329523	0.0416066	1.17974	0.695242	0.998175	0.998175	1632818_at	1632818_at	FBgn0052281	2008-11-29	Flybase	CG32281-RA	CG32281-RA /FEA=BDGP /GEN=CG32281 /DB_XREF=CG32281 FBgn0052281 /SEG=chr3L:+3150003,3151538 /MAP=63B8-63B8 /LEN=1535 /DEF=(CG32281 gene symbol:CG32281 synonyms:(CG12032) FBgn0052281 )	CG32281-RA	---	---	April 2004 (BDGP v4.0)	chr3L:3169374-3170909 (+) // 100.0 //	CG32281	CG32281	---	full length	FBgn0052281	317953	Q8IRE4	---	---	NP_728821	NM_167995	FBgn0052281	---	---	---	---	---	0006400 // tRNA modification // inferred from sequence or structural similarity /// 0006555 // methionine metabolic process // inferred from sequence or structural similarity	---	0008175 // tRNA methyltransferase activity // inferred from sequence or structural similarity	---	---	---	---	This probe set was annotated using the Matching Probes based pipeline to a Entrez Gene identifier using 1 transcripts. // false // Matching Probes // A	NM_167995(14)
1626588_a_at	pearson	-0.350385	0.0978887	-2.21321	0.547651	0.0334968	0.041751	1.18661	0.587853	0.988667	0.988667	1626588_a_at	1626588_a_at	FBgn0032407	2008-11-29	Flybase	CG5325-RB	CG5325-RB /FEA=BDGP /GEN=CG5325 /DB_XREF=CG5325 FBgn0032407 /SEG=chr2L:+12082641,12083506 /MAP=33C4-33C4 /LEN=716 /DEF=(CG5325 gene symbol:CG5325 FBgn0032407 )	CG5325-RB	---	---	April 2004 (BDGP v4.0)	chr2L:12093770-12094635 (+) // 100.0 //	Peroxisomal farnesylated protein	CG5325	---	full length	FBgn0032407	34630	Q8IP97 /// Q8T9H4 /// Q9VKB5	---	---	NP_609547 /// NP_723722	NM_135703 /// NM_164991	FBgn0032407	---	---	---	---	---	---	0005777 // peroxisome // inferred from electronic annotation	0005515 // protein binding // inferred from physical interaction	---	IPR006708 // Pex19 protein // 6.9E-34	---	---	This probe set was annotated using the Matching Probes based pipeline to a Entrez Gene identifier using 3 transcripts. // false // Matching Probes // A	BT009961(14),NM_135703(14),NM_164991(14)
1627936_s_at	pearson	0.351359	0.300039	2.22023	1.75123	0.0329748	0.0418286	1.17637	0.0897966	0.874239	0.874239	1627936_s_at	1627936_s_at	---	2008-11-29	Flybase	Transposon.59	NO_REP_ID /FEA=transposon /LEN=5484 /DESC=gb|-|invader3 INVADER3 5484bp	Transposon.59	---	---	April 2004 (BDGP v4.0)	chr3R:3533255-3539357 (+) // 98.91 // /// chr3R:3520353-3533541 (+) // 98.89 // /// chr2R:2358323-2363800 (+) // 99.6 // /// chr2RHet:810082-815512 (-) // 98.36 // /// chr2RHet:804991-810356 (-) // 97.19 // /// chr3RHet:882513-887914 (-) // 96.92 // /// chrYHet:157388-159454 (-) // 36.93 // /// chrX:21818923-21824305 (-) // 97.67 // /// chr2L:22950634-22956081 (-) // 99.16 // /// chr2R:1509625-15…	---	---	---	full length	---	---	Q6NNX7 /// Q9VIC7	EC:3.1.1.1	---	NP_731172	NM_169191	---	---	---	---	---	---	---	---	0003824 // catalytic activity // inferred from electronic annotation /// 0004091 // carboxylesterase activity // non-traceable author statement /// 0016787 // hydrolase activity // inferred from electronic annotation /// 0042043 // neurexin binding // non-traceable author statement	---	---	ABC86275.1 // span:834-856 // numtm:1	---	This probe set was annotated using the Genome Consensus/Exemplar Overlap based pipeline to a Entrez Gene identifier using 1 transcripts. // false // Genome Consensus/Exemplar Overlap // C	BT024213
1625515_a_at	pearson	-0.349561	0.0395921	-2.20728	0.220612	0.0339445	0.0419517	1.18994	0.826841	1.00057	1.00057	1625515_a_at	1625515_a_at	FBgn0003345	2008-11-29	Flybase	CG8544-RB	CG8544-RB /FEA=BDGP /GEN=sd /DB_XREF=CG8544 FBgn0003345 /SEG=chrX:+15543341,15556511 /MAP=13F1-13F4 /LEN=2968 /DEF=(CG8544 gene symbol:sd FBgn0003345 (GO:0007399 neurogenesis) (GO:0003700 transcription factor) (GO:0003704 specific RNA polymerase II transcription factor) (GO:0005634 nucleus) (GO:0007476 wing morphogenesis))	CG8544-RB	---	---	April 2004 (BDGP v4.0)	chrX:15706360-15719530 (+) // 100.0 //	scalloped	sd	chr1-51.5	full length	FBgn0003345	32536	A8JUY5 /// A8JUY9 /// P30052 /// Q058U0 /// Q32KE5 /// Q8IR25 /// Q8SZ20	---	---	NP_001096989 /// NP_001096990 /// NP_001096991 /// NP_001096992 /// NP_511169 /// NP_727900 /// NP_996450	NM_001103519 /// NM_001103520 /// NM_001103521 /// NM_001103522 /// NM_078614 /// NM_167465 /// NM_206727	FBgn0003345	---	---	---	---	---	0001745 // compound eye morphogenesis // inferred from mutant phenotype /// 0006350 // transcription // inferred from electronic annotation /// 0006355 // regulation of transcription, DNA-dependent // inferred from electronic annotation /// 0006357 // regulation of transcription from RNA polymerase II promoter // inferred from sequence or structural similarity /// 0007049 // cell cycle // inferre…	0005634 // nucleus // inferred from sequence or structural similarity /// 0005634 // nucleus // non-traceable author statement /// 0005634 // nucleus // inferred from electronic annotation /// 0005634 // nucleus // inferred from direct assay	0003677 // DNA binding // inferred from electronic annotation /// 0003700 // transcription factor activity // inferred from electronic annotation /// 0003700 // transcription factor activity // non-traceable author statement /// 0003704 // specific RNA polymerase II transcription factor activity // inferred from sequence or structural similarity /// 0005515 // protein binding // inferred from phy…	---	---	---	---	This probe set was annotated using the Matching Probes based pipeline to a Entrez Gene identifier using 8 transcripts. // false // Matching Probes // A	M83787(13),NM_001103519(14),NM_001103520(14),NM_001103521(14),NM_001103522(14),NM_078614(14),NM_167465(14),NM_206727(14)
1624389_at	pearson	-0.351136	-0.175593	-2.21862	-0.993089	0.0330938	0.0419637	1.17646	0.328356	0.96145	0.96145	1624389_at	1624389_at	FBgn0035798	2008-11-29	Flybase	CG7526-RA	CG7526-RA /FEA=BDGP /GEN=CG7526 /DB_XREF=CG7526 FBgn0035798 /SEG=chr3L:+7523863,7529023 /MAP=66A5-66A5 /LEN=4409 /DEF=(CG7526 gene symbol:CG7526 FBgn0035798 )	CG7526-RA	---	---	April 2004 (BDGP v4.0)	chr3L:7557434-7562594 (+) // 100.0 //	CG7526	CG7526	---	full length	FBgn0035798	38850	B3DN72 /// Q8MQJ4 /// Q9VS89	---	---	NP_648137 /// NP_996014	NM_139880 /// NM_206292	FBgn0035798	---	---	---	---	---	0007596 // blood coagulation // inferred from electronic annotation	0016020 // membrane // inferred from electronic annotation	0004888 // transmembrane receptor activity // inferred from electronic annotation /// 0005509 // calcium ion binding // inferred from electronic annotation	---	---	---	---	This probe set was annotated using the Matching Probes based pipeline to a Entrez Gene identifier using 2 transcripts. // false // Matching Probes // A	NM_139880(14),NM_206292(14)
1641722_at	pearson	-0.349203	-0.137292	-2.20471	-0.771716	0.0341399	0.0419927	1.19265	0.446126	0.984716	0.984716	1641722_at	1641722_at	FBgn0016715	2008-11-29	Flybase	CG3200-RA	CG3200-RA /FEA=BDGP /SEG=chr3L:-585793,587187	CG3200-RA	---	---	April 2004 (BDGP v4.0)	chr3L:605164-606558 (-) // 100.0 //	rhythmically expressed gene 2	Reg-2	---	full length	FBgn0016715	38075	Q8MR71 /// Q94915	---	---	NP_612043	NM_138199	FBgn0016715	---	---	---	---	---	0008152 // metabolic process // inferred from electronic annotation	---	0003824 // catalytic activity // inferred from electronic annotation /// 0008967 // phosphoglycolate phosphatase activity // inferred from electronic annotation /// 0016787 // hydrolase activity // inferred from electronic annotation	---	---	---	---	This probe set was annotated using the Matching Probes based pipeline to a Entrez Gene identifier using 2 transcripts. // false // Matching Probes // A	NM_138199(14),U65492(13)
1623268_a_at	pearson	-0.350367	-0.178626	-2.21308	-1.0108	0.0335067	0.0420333	1.18281	0.319935	0.960757	0.960757	1623268_a_at	1623268_a_at	FBgn0061361	2008-11-29	Flybase	CG33005-RA	CG33005-RA /FEA=BDGP /GEN=CG33005 /DB_XREF=CG33005 FBgn0053005 /SEG=chr2R:-15706172,15707492 /MAP=57A8-57A9 /LEN=1245 /DEF=(CG33005 gene symbol:CG33005 synonyms:(CG30144 CG10438) FBgn0053005 )	CG33005-RA	---	---	April 2004 (BDGP v4.0)	chr2R:16529965-16531285 (-) // 100.0 //	CG33785 /// CG33786	CG33785 /// CG33786	---	full length	FBgn0061361 /// FBgn0061362	3772344 /// 3772640	A1ZBX4 /// Q8SYJ9	EC:2.7.7.6	---	NP_001027443 /// NP_001027444	NM_001032272 /// NM_001032273	FBgn0061361 /// FBgn0061362	---	---	---	---	---	0006350 // transcription // inferred from electronic annotation /// 0006359 // regulation of transcription from RNA polymerase III promoter // inferred from sequence or structural similarity /// 0006412 // translation // inferred from sequence or structural similarity /// 0045449 // regulation of transcription // inferred from electronic annotation	0005666 // DNA-directed RNA polymerase III complex // inferred from sequence or structural similarity	0003676 // nucleic acid binding // inferred from electronic annotation /// 0003677 // DNA binding // inferred from electronic annotation /// 0003899 // DNA-directed RNA polymerase activity // inferred from sequence or structural similarity /// 0003899 // DNA-directed RNA polymerase activity // inferred from electronic annotation /// 0008270 // zinc ion binding // inferred from electronic annotati…	---	---	---	---	This probe set was annotated using the Matching Probes based pipeline to a Entrez Gene identifier using 3 transcripts. // true // Matching Probes // A	FBtr0091787(14),FBtr0091786(14),NM_001032273(14),NM_001032272(14),AY071501(14),GENSCAN00000016641(11),FBtr0091786(14),FBtr0091787(14)
1629034_at	pearson	-0.382079	-0.088728	-2.44599	-0.495973	0.0196143	0.0420528	1.00521	0.623412	0.993052	0.993052	1629034_at	1629034_at	FBgn0033983	2008-11-29	Flybase	CG10253-RA	CG10253-RA /FEA=BDGP /GEN=CG10253 /DB_XREF=CG10253 FBgn0033983 /SEG=chr2R:-9993806,9997026 /MAP=51D3-51D3 /LEN=2374 /DEF=(CG10253 gene symbol:CG10253 FBgn0033983 (GO:0008611 ether lipid biosynthesis) (GO:0008609 alkylglycerone-phosphate synthase) (GO:0005777 peroxisome))	CG10253-RA	---	---	April 2004 (BDGP v4.0)	chr2R:10817585-10820805 (-) // 100.0 //	CG10253 /// ---	CG10253 /// DmirCG10253	---	full length	FBgn0033983	36669	Q9V778	EC:2.5.1.26	---	NP_611006	NM_137162	FBgn0033983 /// FBgn0086625	---	---	---	---	---	0008610 // lipid biosynthetic process // inferred from electronic annotation /// 0008611 // ether lipid biosynthetic process // inferred from sequence or structural similarity	0005777 // peroxisome // inferred from sequence or structural similarity /// 0005777 // peroxisome // inferred from electronic annotation	0003824 // catalytic activity // inferred from electronic annotation /// 0008609 // alkylglycerone-phosphate synthase activity // inferred from sequence or structural similarity /// 0008609 // alkylglycerone-phosphate synthase activity // inferred from electronic annotation /// 0016491 // oxidoreductase activity // inferred from electronic annotation /// 0016740 // transferase activity // inferre…	---	---	---	---	This probe set was annotated using the Matching Probes based pipeline to a Entrez Gene identifier using 2 transcripts. // false // Matching Probes // A	AY094917(14),NM_137162(14)
1626933_s_at	pearson	-0.349122	-0.293576	-2.20413	-1.70991	0.0341842	0.0422377	1.19008	0.097276	0.889582	0.889582	1626933_s_at	1626933_s_at	FBgn0035205	2008-11-29	Flybase	CG2469-RB	CG2469-RB /FEA=BDGP /GEN=CG2469 /DB_XREF=CG2469 FBgn0035205 /SEG=chr3L:+1287852,1292441 /MAP=61F5-61F6 /LEN=3777 /DEF=(CG2469 gene symbol:CG2469 FBgn0035205 )	CG2469-RB	---	---	April 2004 (BDGP v4.0)	chr3L:1307223-1311812 (+) // 100.0 //	CG2469	CG2469	---	full length	FBgn0035205	38149	Q7K0X3	---	---	NP_788448 /// NP_788449	NM_176270 /// NM_176271	FBgn0035205	---	---	---	---	---	---	---	0005488 // binding // inferred from electronic annotation	---	IPR011716 // Tetratricopeptide TPR_3 // 0.035	---	---	This probe set was annotated using the Matching Probes based pipeline to a Entrez Gene identifier using 3 transcripts. // false // Matching Probes // A	AY069525(14),NM_176270(14),NM_176271(14)
1636078_at	pearson	0.348631	0.297933	2.20059	1.73774	0.0344549	0.0422567	1.19538	0.0921833	0.876349	0.876349	1636078_at	1636078_at	FBgn0035873	39781	Flybase	CG13670-RA	CG13670-RA /FEA=BDGP /GEN=CG13670 /DB_XREF=CG13670 FBgn0035873 /SEG=chr3L:+8279545,8280904 /MAP=66C7-66C7 /LEN=801 /DEF=(CG13670 gene symbol:CG13670 FBgn0035873 (GO:0008010 structural constituent of larval cuticle (sensu Insecta)))	CG13670-RA	---	---	April 2004 (BDGP v4.0)	chr3L:8313935-8315294 (+) // 100.0 //	CG13670	CG13670	---	full length	FBgn0035873	38938	Q9VSH5	---	---	NP_648207	NM_139950	FBgn0035873	---	---	---	---	---	---	---	0008010 // structural constituent of chitin-based larval cuticle // inferred from sequence or structural similarity /// 0042302 // structural constituent of cuticle // inferred from electronic annotation	---	---	FBtr0076708 // span:50-72 // numtm:1 /// NP_648207.1 // span:50-72 // numtm:1 /// ABC86405.1 // span:50-72 // numtm:1 /// GENSCAN00000010834 // span:50-72 // numtm:1 /// FBpp0076431 // span:50-72 // numtm:1	---	This probe set was annotated using the Matching Probes based pipeline to a Entrez Gene identifier using 2 transcripts. // false // Matching Probes // A	BT024343(14),NM_139950(14)
1640337_a_at	pearson	-0.350318	-0.294231	-2.21273	-1.71408	0.0335333	0.0423508	1.17962	0.0964975	0.888094	0.888094	1640337_a_at	1640337_a_at	FBgn0085445	2008-11-29	Flybase	CG7462-RC	CG7462-RC /FEA=BDGP /GEN=Ank2 /DB_XREF=CG7462 FBgn0017645 /SEG=chr3L:-7664341,7673149 /MAP=66A10-66A10 /LEN=4727 /DEF=(CG7462 gene symbol:Ank2 FBgn0017645 (GO:0008092 cytoskeletal protein binding) (GO:0005200 structural constituent of cytoskeleton) (GO:0005886 plasma membrane) (GO:0007016 cytoskeletal anchoring))	CG7462-RC	---	---	April 2004 (BDGP v4.0)	chr3L:7697917-7706720 (-) // 99.89 //	Ank2	Ank2	---	full length	FBgn0085445	38863	Q3KN55 /// Q7KIS5 /// Q7KU92 /// Q7KU95 /// Q8SWY2 /// Q9I7Q8 /// Q9NCP8	---	---	NP_001036592 /// NP_001097533 /// NP_001097534 /// NP_001097535 /// NP_001097536 /// NP_001097537 /// NP_001097538 /// NP_001097539 /// NP_648148 /// NP_729285	NM_001043127 /// NM_001043127 /// NM_001104063 /// NM_001104064 /// NM_001104065 /// NM_001104066 /// NM_001104067 /// NM_001104068 /// NM_001104069 /// NM_139891 /// NM_168227	FBgn0085445	---	---	---	---	---	0007016 // cytoskeletal anchoring at plasma membrane // inferred from sequence or structural similarity /// 0007016 // cytoskeletal anchoring at plasma membrane // non-traceable author statement /// 0007165 // signal transduction // inferred from electronic annotation /// 0048675 // axon extension // inferred from mutant phenotype	0005886 // plasma membrane // inferred from sequence or structural similarity	0005200 // structural constituent of cytoskeleton // inferred from sequence or structural similarity /// 0005200 // structural constituent of cytoskeleton // non-traceable author statement /// 0005515 // protein binding // inferred from electronic annotation /// 0008092 // cytoskeletal protein binding // inferred from sequence or structural similarity	---	---	---	---	This probe set was annotated using the Matching Probes based pipeline to a Entrez Gene identifier using 2 transcripts. // false // Matching Probes // A	AF190635(14),NM_001104063(14)
1628884_at	pearson	0.348508	0.533177	2.19971	3.50897	0.0345227	0.0424223	1.19364	0.00139898	0.243518	0.243518	1628884_at	1628884_at	FBgn0030310	2008-11-29	Flybase	CG11709-RA	CG11709-RA /FEA=BDGP /SEG=chrX:+11303467,11304719	CG11709-RA	---	---	April 2004 (BDGP v4.0)	chrX:11455561-11456813 (+) // 100.0 //	semmelweis	PGRP-SA	---	full length	FBgn0030310	32099	Q9VYX7	EC:3.5.1.28	---	NP_572727	NM_132499	FBgn0030310	---	---	---	---	---	0006952 // defense response // non-traceable author statement /// 0006955 // immune response // inferred from sequence or structural similarity /// 0006955 // immune response // traceable author statement /// 0006955 // immune response // inferred from electronic annotation /// 0006965 // positive regulation of biosynthetic process of antibacterial peptides active against Gram-positive bacteria /…	0005576 // extracellular region // inferred from direct assay /// 0005576 // extracellular region // inferred from sequence or structural similarity /// 0005576 // extracellular region // inferred from electronic annotation /// 0005887 // integral to plasma membrane // non-traceable author statement	0005515 // protein binding // inferred from physical interaction /// 0005515 // protein binding // inferred from electronic annotation /// 0008233 // peptidase activity // inferred from electronic annotation /// 0008329 // pattern recognition receptor activity // traceable author statement /// 0008745 // N-acetylmuramoyl-L-alanine amidase activity // inferred from electronic annotation /// 001601…	---	---	FBtr0073509 // span:10-27 // numtm:1 /// NP_572727.1 // span:10-27 // numtm:1 /// AAG23735.1 // span:10-27 // numtm:1 /// AAL68160.1 // span:10-27 // numtm:1 /// GENSCAN00000012387 // span:10-27 // numtm:1 /// FBpp0073358 // span:10-27 // numtm:1	---	This probe set was annotated using the Matching Probes based pipeline to a Entrez Gene identifier using 3 transcripts. // false // Matching Probes // A	AF207541(14),AY075293(14),NM_132499(14)
1639072_at	pearson	0.348454	0.298567	2.19932	1.7418	0.0345527	0.0426095	1.19059	0.0914595	0.8769	0.8769	1639072_at	1639072_at	FBgn0004864	2008-11-29	Flybase	CG1594-RA	CG1594-RA /FEA=BDGP /GEN=hop /DB_XREF=CG1594 FBgn0004864 /SEG=chrX:-11102837,11110036 /MAP=10B5-10B6 /LEN=5085 /DEF=(CG1594 gene symbol:hop FBgn0004864 (GO:0005737 cytoplasm) (GO:0006468 protein amino acid phosphorylation) (GO:0007480 leg morphogenesis (sensu Holometabola)) (GO:0007538 primary sex determination) (GO:0008283 cell proliferation) (GO:0045317 equator specification) (GO:0007467 photor…	CG1594-RA	---	---	April 2004 (BDGP v4.0)	chrX:11254931-11262130 (-) // 100.0 //	Hopskotch	hop	chr1-34.6	full length	FBgn0004864	32080	Q24592	---	---	NP_511119	NM_078564	FBgn0004864	---	---	---	---	---	0000910 // cytokinesis // traceable author statement /// 0001751 // compound eye photoreceptor cell differentiation // inferred from mutant phenotype /// 0006350 // transcription // inferred from electronic annotation /// 0006355 // regulation of transcription, DNA-dependent // inferred from electronic annotation /// 0006468 // protein amino acid phosphorylation // inferred from electronic annota…	0005737 // cytoplasm // non-traceable author statement /// 0005737 // cytoplasm // traceable author statement /// 0005856 // cytoskeleton // inferred from electronic annotation /// 0012505 // endomembrane system // inferred from electronic annotation /// 0016020 // membrane // inferred from electronic annotation	0000166 // nucleotide binding // inferred from electronic annotation /// 0004672 // protein kinase activity // inferred from electronic annotation /// 0004713 // protein tyrosine kinase activity // non-traceable author statement /// 0004713 // protein tyrosine kinase activity // inferred from electronic annotation /// 0004715 // non-membrane spanning protein tyrosine kinase activity // non-tracea…	---	---	---	---	This probe set was annotated using the Matching Probes based pipeline to a Entrez Gene identifier using 1 transcripts. // false // Matching Probes // A	NM_078564(14)
1633532_at	pearson	-0.381927	-0.379701	-2.44485	-2.28522	0.019667	0.0428111	1.00282	0.0292969	0.687864	0.687864	1633532_at	1633532_at	FBgn0034292	2008-11-29	Flybase	CG5767-RA	CG5767-RA /FEA=BDGP /GEN=CG5767 /DB_XREF=CG5767 FBgn0034292 /SEG=chr2R:-13110169,13111196 /MAP=55B1-55B1 /LEN=782 /DEF=(CG5767 gene symbol:CG5767 FBgn0034292 )	CG5767-RA	---	---	April 2004 (BDGP v4.0)	chr2R:13933940-13934967 (-) // 100.0 //	CG5767	CG5767	---	full length	FBgn0034292	37055	A1ZB21 /// A8E790	---	---	NP_611283	NM_137439	FBgn0034292	---	---	---	---	---	---	---	---	---	---	---	---	This probe set was annotated using the Matching Probes based pipeline to a Entrez Gene identifier using 1 transcripts. // false // Matching Probes // A	NM_137439(14)
1639480_at	pearson	-0.348393	-0.0645746	-2.19889	-0.360288	0.0345864	0.0429236	1.1877	0.721075	0.997667	0.997667	1639480_at	1639480_at	FBgn0000261	2008-11-29	Flybase	CG6871-RA	CG6871-RA /FEA=BDGP /GEN=Cat /DB_XREF=CG6871 FBgn0000261 /SEG=chr3L:+18771484,18777073 /MAP=75E1-75E1 /LEN=1997 /DEF=(CG6871 gene symbol:Cat FBgn0000261 (GO:0006802 catalase reaction) (GO:0042542 response to hydrogen peroxide) (GO:0020037 heme binding) (GO:0005777 peroxisome) (GO:0005886 plasma membrane) (GO:0008014 calcium-dependent cell adhesion molecule) (GO:0004096 catalase) (GO:0006979 respo…	CG6871-RA	---	---	April 2004 (BDGP v4.0)	chr3L:18815705-18821294 (+) // 100.0 //	catalase	Cat	chr3-47.0	full length	FBgn0000261	40048	P17336	EC:1.11.1.6 /// EC:1.11.1.7	---	NP_536731	NM_080483	FBgn0000261	---	---	---	---	---	0006979 // response to oxidative stress // non-traceable author statement /// 0006979 // response to oxidative stress // inferred from electronic annotation /// 0007568 // aging // traceable author statement /// 0008340 // determination of adult life span // traceable author statement /// 0016339 // calcium-dependent cell-cell adhesion // non-traceable author statement /// 0042542 // response to …	0005777 // peroxisome // non-traceable author statement /// 0005777 // peroxisome // inferred from electronic annotation /// 0005886 // plasma membrane // non-traceable author statement	0004096 // catalase activity // inferred from direct assay /// 0004096 // catalase activity // inferred from sequence or structural similarity /// 0004096 // catalase activity // non-traceable author statement /// 0004096 // catalase activity // inferred from electronic annotation /// 0004601 // peroxidase activity // inferred from electronic annotation /// 0005506 // iron ion binding // inferred…	---	---	---	---	This probe set was annotated using the Matching Probes based pipeline to a Entrez Gene identifier using 1 transcripts. // false // Matching Probes // A	NM_080483(14)
1632500_at	pearson	-0.347762	-0.137617	-2.19435	-0.773581	0.0349377	0.0430107	1.19166	0.445038	0.984898	0.984898	1632500_at	1632500_at	FBgn0035695	2008-11-29	Flybase	CG10226-RA	CG10226-RA /FEA=BDGP /GEN=CG10226 /DB_XREF=CG10226 FBgn0035695 /SEG=chr3L:-6193845,6199118 /MAP=65A10-65A10 /LEN=4147 /DEF=(CG10226 gene symbol:CG10226 FBgn0035695 (GO:0015239 multidrug transporter))	CG10226-RA	---	---	April 2004 (BDGP v4.0)	chr3L:6227416-6232689 (-) // 100.0 //	CG10226	CG10226	---	full length	FBgn0035695	38725	B3DNL5 /// Q95SM0 /// Q9VRW2	EC:3.6.1.3	---	NP_648040	NM_139783	FBgn0035695	---	---	---	---	---	0006810 // transport // inferred from electronic annotation /// 0015893 // drug transport // inferred from sequence or structural similarity	0016021 // integral to membrane // inferred from electronic annotation	0000166 // nucleotide binding // inferred from electronic annotation /// 0005524 // ATP binding // inferred from electronic annotation /// 0015239 // multidrug transporter activity // inferred from sequence or structural similarity /// 0016787 // hydrolase activity // inferred from electronic annotation /// 0016887 // ATPase activity // inferred from electronic annotation /// 0017111 // nucleosid…	---	---	FBtr0077012 // span:51-73,122-144,211-233,315-334,347-366,744-766,787-809,868-890,971-993,1013-1035 // numtm:10 /// NP_648040.1 // span:51-73,122-144,211-233,315-334,347-366,744-766,787-809,868-890,971-993,1013-1035 // numtm:10 /// FBpp0076720 // span:51-73,122-144,211-233,315-334,347-366,744-766,787-809,868-890,971-993,1013-1035 // numtm:10	---	This probe set was annotated using the Matching Probes based pipeline to a Entrez Gene identifier using 1 transcripts. // false // Matching Probes // A	NM_139783(14)
1629795_at	pearson	0.38168	0.49042	2.44299	3.1332	0.0197532	0.0432505	1.00215	0.00376226	0.37239	0.37239	1629795_at	1629795_at	FBgn0016641	2008-11-29	Flybase	CG9856-RA	CG9856-RA /FEA=BDGP /SEG=chr2R:-16662934,16667993	CG9856-RA	---	---	April 2004 (BDGP v4.0)	chr2R:17506888-17511947 (-) // 100.0 //	Protein tyrosine phosphatase-ERK/Enhancer of Ras1	PTP-ER	chr2-	full length	FBgn0016641	37461	B3DNM2 /// Q9W2F3	EC:3.1.3.48	---	NP_726092	NM_166465	FBgn0016641	---	---	---	---	---	0000188 // inactivation of MAPK activity // non-traceable author statement /// 0006470 // protein amino acid dephosphorylation // inferred from direct assay /// 0006470 // protein amino acid dephosphorylation // non-traceable author statement /// 0006470 // protein amino acid dephosphorylation // inferred from electronic annotation /// 0007265 // Ras protein signal transduction // inferred from g…	0005737 // cytoplasm // inferred from direct assay	0004725 // protein tyrosine phosphatase activity // inferred from direct assay /// 0004725 // protein tyrosine phosphatase activity // inferred from sequence or structural similarity /// 0004725 // protein tyrosine phosphatase activity // non-traceable author statement /// 0004725 // protein tyrosine phosphatase activity // inferred from electronic annotation /// 0005515 // protein binding // inf…	---	---	---	---	This probe set was annotated using the Matching Probes based pipeline to a Entrez Gene identifier using 2 transcripts. // false // Matching Probes // A	AF146594(12),NM_166465(14)
1638030_at	pearson	0.348352	0.384143	2.19859	2.31656	0.0346095	0.0432769	1.18447	0.0273064	0.69971	0.69971	1638030_at	1638030_at	FBgn0033104	2008-11-29	Flybase	CG15237-RA	CG15237-RA /FEA=BDGP /GEN=CG15237 /DB_XREF=CG15237 FBgn0033104 /SEG=chr2R:-1870118,1870594 /MAP=42D1-42D1 /LEN=351 /DEF=(CG15237 gene symbol:CG15237 FBgn0033104 )	CG15237-RA	---	---	April 2004 (BDGP v4.0)	chr2R:2696721-2697197 (-) // 100.0 //	CG15237	CG15237	---	full length	FBgn0033104	35591	Q4V665	---	---	NP_610238	NM_136394	FBgn0033104	---	---	---	---	---	---	---	---	---	---	---	---	This probe set was annotated using the Matching Probes based pipeline to a Entrez Gene identifier using 2 transcripts. // false // Matching Probes // A	BT022441(14),NM_136394(14)
1625476_a_at	pearson	-0.347753	-0.0240031	-2.19429	-0.133682	0.0349426	0.0433498	1.18781	0.894518	0.9945	0.9945	1625476_a_at	1625476_a_at	FBgn0039897	2008-11-29	Flybase	CG1674-RA	CG1674-RA /FEA=BDGP /GEN=CG1674 /DB_XREF=CG1674 FBgn0039897 /SEG=chr4:+251220,264317 /MAP=102B2-102B3 /LEN=2392 /DEF=(CG1674 gene symbol:CG1674 FBgn0039897 )	CG1674-RA	---	---	April 2004 (BDGP v4.0)	chr4:252108-265205 (+) // 100.0 //	CG1674	CG1674	---	full length	FBgn0039897	43780	Q1RKY9 /// Q8IGF3 /// Q8IMB8 /// Q8IMB9 /// Q8SXK8 /// Q9V4C1	---	---	NP_651913 /// NP_726553 /// NP_726554 /// NP_995588	NM_143656 /// NM_166746 /// NM_166747 /// NM_205866	FBgn0039897	---	---	---	---	---	---	---	0005515 // protein binding // inferred from physical interaction	---	---	---	---	This probe set was annotated using the Matching Probes based pipeline to a Entrez Gene identifier using 3 transcripts. // false // Matching Probes // A	NM_143656(14),NM_166746(14),NM_166747(14)
1630915_at	pearson	0.347554	0.425435	2.19286	2.6174	0.0350543	0.0435204	1.18761	0.0135776	0.603873	0.603873	1630915_at	1630915_at	---	2008-11-29	Flybase	HDC15077	HDC15077 /FEA=HDP /SEG=chr3R:-18584619,18585091	HDC15077	---	---	April 2004 (BDGP v4.0)	chr3R:18593963-18594435 (-) // 100.0 //	---	---	---	---	---	---	---	---	---	---	---	---	---	---	---	---	---	---	---	---	---	---	---	---	This probe set was annotated using the Design Representative Id based pipeline to a Flybase identifier using 1 transcripts. // false // Design Representative Id // R	HDC15077
1640267_at	pearson	0.34346	0.049143	2.16355	0.273947	0.0374098	0.0436635	1.23026	0.785942	1.00353	1.00353	1640267_at	1640267_at	FBgn0038454	2008-11-29	Flybase	CG10324-RA	CG10324-RA /FEA=BDGP /GEN=CG10324 /DB_XREF=CG10324 FBgn0038454 /SEG=chr3R:-12470615,12472729 /MAP=89D6-89D6 /LEN=1992 /DEF=(CG10324 gene symbol:CG10324 FBgn0038454 )	CG10324-RA	---	---	April 2004 (BDGP v4.0)	chr3R:12470597-12472711 (-) // 100.0 //	CG10324	CG10324	---	full length	FBgn0038454	42028	Q8SZD8 /// Q9VES0	---	---	NP_650571	NM_142314	FBgn0038454	---	---	---	---	---	---	0005622 // intracellular // inferred from electronic annotation	0003676 // nucleic acid binding // inferred from electronic annotation /// 0005515 // protein binding // inferred from physical interaction	---	---	---	---	This probe set was annotated using the Matching Probes based pipeline to a Entrez Gene identifier using 1 transcripts. // false // Matching Probes // A	NM_142314(14)
1634869_at	pearson	-0.346525	0.230404	-2.18548	1.3183	0.0356342	0.0437083	1.19523	0.19706	0.949652	0.949652	1634869_at	1634869_at	FBgn0025352	2008-11-29	Flybase	CG4581-RA	CG4581-RA /FEA=BDGP /GEN=Thiolase /DB_XREF=CG4581 FBgn0025352 /SEG=chr2R:-18910168,18912184 /MAP=60A5-60A5 /LEN=1653 /DEF=(CG4581 gene symbol:Thiolase FBgn0025352 (GO:0003988 acetyl-CoA C-acyltransferase))	CG4581-RA	---	---	April 2004 (BDGP v4.0)	chr2R:19754123-19756139 (-) // 100.0 //	thiolase	Thiolase	---	full length	FBgn0025352	37784	O77466 /// Q9W1H8	EC:1.1.1.211 /// EC:2.3.1.16	---	NP_477378	NM_058030	FBgn0025352	---	---	---	---	---	0006635 // fatty acid beta-oxidation // inferred from sequence or structural similarity /// 0008152 // metabolic process // inferred from electronic annotation /// 0055114 // oxidation reduction // inferred from electronic annotation	0005811 // lipid particle // inferred from direct assay /// 0016507 // fatty acid beta-oxidation multienzyme complex // inferred from sequence or structural similarity	0003824 // catalytic activity // inferred from electronic annotation /// 0003988 // acetyl-CoA C-acyltransferase activity // inferred from sequence or structural similarity /// 0003988 // acetyl-CoA C-acyltransferase activity // inferred from electronic annotation /// 0008415 // acyltransferase activity // inferred from electronic annotation /// 0016491 // oxidoreductase activity // inferred from…	---	---	---	---	This probe set was annotated using the Matching Probes based pipeline to a Entrez Gene identifier using 2 transcripts. // false // Matching Probes // A	AY069124(13),NM_058030(14)
1628991_at	pearson	-0.343246	0.133297	-2.16202	0.748847	0.0375362	0.0437907	1.23041	0.459594	0.984106	0.984106	1628991_at	1628991_at	FBgn0019830	2008-11-29	Flybase	CG3057-RA	CG3057-RA /FEA=BDGP /GEN=colt /DB_XREF=CG3057 FBgn0019830 /SEG=chr2L:-2761186,2762635 /MAP=23A5-23A5 /LEN=1449 /DEF=(CG3057 gene symbol:colt FBgn0019830 (GO:0005215 transporter) (GO:0005740 mitochondrial membrane) (GO:0005476 carnitineacyl carnitine carrier) (GO:0005743 mitochondrial inner membrane))	CG3057-RA	---	---	April 2004 (BDGP v4.0)	chr2L:2768617-2770066 (-) // 100.0 //	congested-like trachea	colt	---	full length	FBgn0019830	33470	Q9VQG4	---	---	NP_477221 /// NP_995616 /// NP_995617 /// NP_995618	NM_057873 /// NM_205894 /// NM_205895 /// NM_205896	FBgn0019830	---	---	---	---	---	0006810 // transport // inferred from electronic annotation /// 0006839 // mitochondrial transport // inferred from sequence or structural similarity /// 0006844 // acyl carnitine transport // inferred from sequence or structural similarity /// 0006911 // phagocytosis, engulfment // inferred from mutant phenotype /// 0007275 // multicellular organismal development // inferred from electronic anno…	0005739 // mitochondrion // inferred from electronic annotation /// 0005740 // mitochondrial envelope // inferred from sequence or structural similarity /// 0005740 // mitochondrial envelope // non-traceable author statement /// 0005743 // mitochondrial inner membrane // inferred from sequence or structural similarity /// 0005743 // mitochondrial inner membrane // inferred from electronic annotat…	0005215 // transporter activity // inferred from sequence or structural similarity /// 0005215 // transporter activity // non-traceable author statement /// 0005215 // transporter activity // inferred from electronic annotation /// 0005476 // carnitine:acyl carnitine antiporter activity // inferred from sequence or structural similarity /// 0005488 // binding // inferred from electronic annotation	---	---	FBtr0077731 // span:79-101,113-135,210-232 // numtm:3 /// FBtr0077732 // span:79-101,113-135,210-232 // numtm:3 /// FBtr0077733 // span:79-101,113-135,210-232 // numtm:3 /// FBtr0077734 // span:79-101,113-135,210-232 // numtm:3 /// NP_477221.1 // span:79-101,113-135,210-232 // numtm:3 /// NP_995618.1 // span:79-101,113-135,210-232 // numtm:3 /// NP_995617.1 // span:79-101,113-135,210-232 // numtm…	---	This probe set was annotated using the Matching Probes based pipeline to a Entrez Gene identifier using 5 transcripts. // false // Matching Probes // A	AY069277(12),NM_057873(14),NM_205894(14),NM_205895(14),NM_205896(14)
1633803_at	pearson	-0.347451	0.0175993	-2.19212	0.0980038	0.0351117	0.043818	1.18558	0.92256	0.994678	0.994678	1633803_at	1633803_at	FBgn0003076	2008-11-29	Flybase	CG5165-RA	CG5165-RA /FEA=BDGP /GEN=Pgm /DB_XREF=CG5165 FBgn0003076 /SEG=chr3L:-16074933,16077475 /MAP=72D8-72D8 /LEN=1871 /DEF=(CG5165 gene symbol:Pgm FBgn0003076 (GO:0004614 phosphoglucomutase))	CG5165-RA	---	---	April 2004 (BDGP v4.0)	chr3L:16119154-16121696 (-) // 100.0 //	Phosphogluconate mutase	Pgm	chr3-	full length	FBgn0003076	44010	Q9VUY9	EC:5.4.2.2	---	NP_524675	NM_079936	FBgn0003076	---	---	---	---	---	0005975 // carbohydrate metabolic process // inferred from electronic annotation /// 0005978 // glycogen biosynthetic process // inferred from mutant phenotype /// 0006006 // glucose metabolic process // inferred from electronic annotation	---	0000287 // magnesium ion binding // inferred from electronic annotation /// 0004614 // phosphoglucomutase activity // inferred from direct assay /// 0004614 // phosphoglucomutase activity // inferred from sequence or structural similarity /// 0004614 // phosphoglucomutase activity // inferred from electronic annotation /// 0016853 // isomerase activity // inferred from electronic annotation /// 0…	---	---	---	---	This probe set was annotated using the Matching Probes based pipeline to a Entrez Gene identifier using 4 transcripts. // false // Matching Probes // A	AF416981(13),AF416984(13),BT010043(14),NM_079936(14)
1624770_at	pearson	0.346499	0.297246	2.18529	1.73334	0.0356494	0.0438815	1.19178	0.0929725	0.877244	0.877244	1624770_at	1624770_at	FBgn0038415	39781	Flybase	CG17929-RA	CG17929-RA /FEA=BDGP /GEN=CG17929 /DB_XREF=CG17929 FBgn0038415 /SEG=chr3R:+12151312,12152958 /MAP=89B18-89B18 /LEN=1425 /DEF=(CG17929 gene symbol:CG17929 FBgn0038415 )	CG17929-RA	---	---	April 2004 (BDGP v4.0)	chr3R:12151294-12152940 (+) // 100.0 //	CG17929	CG17929	---	full length	FBgn0038415	41978	Q9VEW8	---	---	NP_650532	NM_142275	FBgn0038415	---	---	---	---	---	0006810 // transport // inferred from electronic annotation	0016021 // integral to membrane // inferred from electronic annotation	0005215 // transporter activity // inferred from electronic annotation	---	IPR005828 // General substrate transporter // 2.0E-4	FBtr0083270 // span:53-75,95-117,137-159,194-216,300-322,332-354,367-389,399-421,428-450 // numtm:9 /// NP_650532.1 // span:53-75,95-117,137-159,194-216,300-322,332-354,367-389,399-421,428-450 // numtm:9 /// GENSCAN00000007835 // span:53-75,95-117,137-159,194-216,300-322,332-354,367-389,399-421,428-450 // numtm:9 /// FBpp0082722 // span:53-75,95-117,137-159,194-216,300-322,332-354,367-389,399-421…	---	This probe set was annotated using the Matching Probes based pipeline to a Entrez Gene identifier using 1 transcripts. // false // Matching Probes // A	NM_142275(14)
1639544_at	pearson	-0.347368	-0.0909796	-2.19153	-0.508663	0.0351581	0.0440721	1.18319	0.61459	0.992784	0.992784	1639544_at	1639544_at	FBgn0031008	2008-11-29	Flybase	CG8010-RA	CG8010-RA /FEA=BDGP /GEN=CG8010 /DB_XREF=CG8010 FBgn0031008 /SEG=chrX:-18997613,18999844 /MAP=18B7-18B7 /LEN=1623 /DEF=(CG8010 gene symbol:CG8010 FBgn0031008 )	CG8010-RA	---	---	April 2004 (BDGP v4.0)	chrX:19160686-19162917 (-) // 100.0 //	CG8010	CG8010	---	full length	FBgn0031008	32921	Q9VWJ4	---	---	NP_573373	NM_133145	FBgn0031008	---	---	---	---	---	---	---	0005515 // protein binding // inferred from physical interaction	---	---	---	---	This probe set was annotated using the Matching Probes based pipeline to a Entrez Gene identifier using 2 transcripts. // false // Matching Probes // A	AY058559(14),NM_133145(14)
1634145_s_at	pearson	-0.3456	-0.17132	-2.17886	-0.968185	0.0361626	0.0440939	1.20494	0.340445	0.962514	0.962514	1634145_s_at	1634145_s_at	FBgn0035431	2008-11-29	Flybase	CG14968-RB	CG14968-RB /FEA=BDGP /GEN=CG14968 /DB_XREF=CG14968 FBgn0035431 /SEG=chr3L:-3279964,3283737 /MAP=63C5-63C5 /LEN=934 /DEF=(CG14968 gene symbol:CG14968 FBgn0035431 )	CG14968-RB	---	---	April 2004 (BDGP v4.0)	chr3L:3299335-3303108 (-) // 100.0 //	CG14968	CG14968	---	full length	FBgn0035431	38406	Q9VZR5	---	---	NP_647800 /// NP_728852 /// NP_728853 /// NP_728854 /// NP_728855	NM_139543 /// NM_168011 /// NM_168012 /// NM_168013 /// NM_168014	FBgn0035431	---	---	---	---	---	---	---	0005515 // protein binding // inferred from physical interaction	---	---	---	---	This probe set was annotated using the Matching Probes based pipeline to a Entrez Gene identifier using 6 transcripts. // false // Matching Probes // A	AY071394(14),NM_139543(14),NM_168011(14),NM_168012(14),NM_168013(14),NM_168014(14)
1640817_at	pearson	-0.344656	-0.0520157	-2.1721	-0.290004	0.0367084	0.044162	1.21511	0.773744	1.00472	1.00472	1640817_at	1640817_at	FBgn0052311	2008-11-29	Flybase	CG32311-RB	CG32311-RB /FEA=BDGP /GEN=CG32311 /DB_XREF=CG32311 FBgn0052311 /SEG=chr3L:-2109429,2116686 /MAP=62C4-62C4 /LEN=4210 /DEF=(CG32311 gene symbol:CG32311 synonyms:(CG11850 CG1282) FBgn0052311 (GO:0005200 structural constituent of cytoskeleton))	CG32311-RB	---	---	April 2004 (BDGP v4.0)	chr3L:2128800-2136057 (-) // 100.0 //	D-Titin	zormin	---	full length	FBgn0052311	2769001	Q0E8J3 /// Q0E8J4 /// Q0E8J5 /// Q3KN34 /// Q7Z1Y4 /// Q8SXC1 /// Q9W053	---	---	NP_001036577 /// NP_001036578 /// NP_001036579 /// NP_995962	NM_001043112 /// NM_001043113 /// NM_001043114 /// NM_206240	FBgn0052311	---	---	---	---	---	---	---	0005200 // structural constituent of cytoskeleton // inferred from sequence or structural similarity	---	---	---	---	This probe set was annotated using the Genome Target Overlap based pipeline to a Entrez Gene identifier using 4 transcripts. // false // Genome Target Overlap // B	NM_001043112,NM_001043113,NM_001043114,NM_206240
1628016_s_at	pearson	0.343188	0.277704	2.16161	1.60949	0.0375706	0.0442193	1.22755	0.117646	0.90946	0.90946	1628016_s_at	1628016_s_at	FBgn0017418	2008-11-29	Flybase	CG5659-RA	CG5659-RA /FEA=BDGP /SEG=chrX:-17863094,17868608	CG5659-RA	---	---	April 2004 (BDGP v4.0)	chrX:18026173-18031682 (-) // 99.81 //	Ariadne-1	ari-1	chr1-57.6--58.7	full length	FBgn0017418	32796	A4V4Q7 /// Q86NL7 /// Q94981	EC:6.3.2.19	---	NP_523399 /// NP_728145 /// NP_996500	NM_078675 /// NM_167610 /// NM_206777	FBgn0017418	---	---	---	---	---	---	0005737 // cytoplasm // non-traceable author statement /// 0005737 // cytoplasm // inferred from electronic annotation	0004842 // ubiquitin-protein ligase activity // non-traceable author statement /// 0004842 // ubiquitin-protein ligase activity // inferred from electronic annotation /// 0005515 // protein binding // inferred from electronic annotation /// 0008270 // zinc ion binding // inferred from electronic annotation /// 0016874 // ligase activity // inferred from electronic annotation /// 0046872 // metal …	---	---	---	---	This probe set was annotated using the Matching Probes based pipeline to a Entrez Gene identifier using 4 transcripts. // false // Matching Probes // A	NM_078675(14),NM_167610(14),NM_206777(14),X98310(14)
1624067_at	pearson	0.345452	-0.273416	2.17779	-1.58262	0.036248	0.0442247	1.20381	0.123658	0.907963	0.907963	1624067_at	1624067_at	FBgn0033887	39781	Flybase	CG6704-RA	CG6704-RA /FEA=BDGP /GEN=CG6704 /DB_XREF=CG6704 FBgn0033887 /SEG=chr2R:-9034629,9035957 /MAP=50C20-50C20 /LEN=1157 /DEF=(CG6704 gene symbol:CG6704 FBgn0033887 (GO:0017051 retinol dehydratase) (GO:0004062 aryl sulfotransferase))	CG6704-RA	---	---	April 2004 (BDGP v4.0)	chr2R:9857420-9858748 (-) // 100.0 //	CG6704	CG6704	---	full length	FBgn0033887	36548	A1Z9J8	---	---	NP_610918	NM_137074	FBgn0033887	---	---	---	---	---	---	---	0008146 // sulfotransferase activity // inferred from sequence or structural similarity /// 0008146 // sulfotransferase activity // inferred from electronic annotation /// 0017051 // retinol dehydratase activity // inferred from sequence or structural similarity	---	---	---	---	This probe set was annotated using the Matching Probes based pipeline to a Entrez Gene identifier using 1 transcripts. // false // Matching Probes // A	NM_137074(14)
1627552_at	pearson	0.344508	0.436611	2.17104	2.7021	0.0367948	0.0443082	1.21399	0.0110739	0.567522	0.567522	1627552_at	1627552_at	---	2008-11-29	Flybase	HDC09735	HDC09735 /FEA=HDP /SEG=chr3L:-11930710,11931302	HDC09735	---	---	April 2004 (BDGP v4.0)	chr3L:11966262-11966795 (-) // 99.26 //	---	---	---	---	---	---	A2VEP6 /// A2VES8	---	---	---	---	---	---	---	---	---	---	0006030 // chitin metabolic process // inferred from electronic annotation	0005576 // extracellular region // inferred from electronic annotation	0008061 // chitin binding // inferred from electronic annotation	---	---	---	---	This probe set was annotated using the Matching Probes based pipeline to a UniGene identifier using 1 transcripts. // false // Matching Probes // A	BT030247(14)
1637658_at	pearson	-0.342717	-0.383439	-2.15825	-2.31158	0.0378508	0.0443731	1.22875	0.0276141	0.693513	0.693513	1637658_at	1637658_at	FBgn0028956	2008-11-29	Flybase	CG6530-RA	CG6530-RA /FEA=BDGP /SEG=chr2R:-12512257,12516319	CG6530-RA	---	---	April 2004 (BDGP v4.0)	chr2R:13336037-13340099 (-) // 100.0 //	mth-like 3	mthl3	---	full length	FBgn0028956	36961	Q6NNZ3 /// Q9V818	---	---	NP_663308	NM_145335	FBgn0028956	---	---	---	---	---	0006950 // response to stress // inferred from sequence or structural similarity /// 0006950 // response to stress // inferred from electronic annotation /// 0007165 // signal transduction // inferred from electronic annotation /// 0007186 // G-protein coupled receptor protein signaling pathway // inferred from sequence or structural similarity /// 0007186 // G-protein coupled receptor protein si…	0005886 // plasma membrane // inferred from electronic annotation /// 0016020 // membrane // inferred from electronic annotation /// 0016021 // integral to membrane // inferred from sequence or structural similarity /// 0016021 // integral to membrane // non-traceable author statement /// 0016021 // integral to membrane // inferred from electronic annotation	0004871 // signal transducer activity // inferred from electronic annotation /// 0004872 // receptor activity // inferred from electronic annotation /// 0004930 // G-protein coupled receptor activity // inferred from sequence or structural similarity /// 0004930 // G-protein coupled receptor activity // inferred from electronic annotation /// 0005515 // protein binding // inferred from physical i…	---	---	FBtr0086955 // span:213-235,247-266,276-298,318-340,369-391,422-444,459-478 // numtm:7 /// NP_663308.1 // span:213-235,247-266,276-298,318-340,369-391,422-444,459-478 // numtm:7 /// FBpp0086111 // span:213-235,247-266,276-298,318-340,369-391,422-444,459-478 // numtm:7	---	This probe set was annotated using the Matching Probes based pipeline to a Entrez Gene identifier using 1 transcripts. // false // Matching Probes // A	NM_145335(14)
1634939_at	pearson	0.343037	0.407852	2.16053	2.48708	0.0376604	0.0444597	1.22652	0.0184693	0.663579	0.663579	1634939_at	1634939_at	FBgn0032810	2008-11-29	Flybase	CG13077-RA	CG13077-RA /FEA=BDGP /GEN=CG13077 /DB_XREF=CG13077 FBgn0032810 /SEG=chr2L:+19543944,19545442 /MAP=37F1-37F2 /LEN=1147 /DEF=(CG13077 gene symbol:CG13077 FBgn0032810 )	CG13077-RA	---	---	April 2004 (BDGP v4.0)	chr2L:19565861-19567359 (+) // 100.0 //	CG13077	CG13077	---	full length	FBgn0032810	35252	Q9VIT5	---	---	NP_609990	NM_136146	FBgn0032810	---	---	---	---	---	---	0016021 // integral to membrane // inferred from electronic annotation	0005515 // protein binding // inferred from physical interaction	---	---	FBtr0081257 // span:64-86,96-118,131-153,166-188,201-220,235-254 // numtm:6 /// NP_609990.1 // span:64-86,96-118,131-153,166-188,201-220,235-254 // numtm:6 /// AAL68336.1 // span:64-86,96-118,131-153,166-188,201-220,235-254 // numtm:6 /// GENSCAN00000006628 // span:64-86,96-118,131-153,166-188,201-220,235-254 // numtm:6 /// FBpp0080798 // span:64-86,96-118,131-153,166-188,201-220,235-254 // numtm…	---	This probe set was annotated using the Matching Probes based pipeline to a Entrez Gene identifier using 2 transcripts. // false // Matching Probes // A	AY075529(14),NM_136146(14)
1622912_at	pearson	-0.342571	0.100912	-2.15721	0.564737	0.0379375	0.0446303	1.22762	0.576317	0.989035	0.989035	1622912_at	1622912_at	FBgn0030872	2008-11-29	Flybase	CG6492-RA	CG6492-RA /FEA=BDGP /GEN=Ucp4A /DB_XREF=CG6492 FBgn0030872 /SEG=chrX:+17575946,17578615 /MAP=16E1-16E1 /LEN=1476 /DEF=(CG6492 gene symbol:Ucp4A FBgn0030872 (GO:0015302 uncoupling protein) (GO:0005740 mitochondrial membrane) (GO:0005386 carrier))	CG6492-RA	---	---	April 2004 (BDGP v4.0)	chrX:17739020-17741689 (+) // 100.0 //	Ucp4A	Ucp4A	---	full length	FBgn0030872	32764	Q9VX14	---	---	NP_573246	NM_133018	FBgn0030872	---	---	---	---	---	0006810 // transport // inferred from electronic annotation /// 0006839 // mitochondrial transport // inferred from electronic annotation /// 0015992 // proton transport // inferred from sequence or structural similarity	0005739 // mitochondrion // inferred from electronic annotation /// 0005740 // mitochondrial envelope // inferred from sequence or structural similarity /// 0005743 // mitochondrial inner membrane // inferred from sequence or structural similarity /// 0005743 // mitochondrial inner membrane // inferred from electronic annotation /// 0016020 // membrane // inferred from electronic annotation /// 0…	0005215 // transporter activity // inferred from electronic annotation /// 0005488 // binding // inferred from electronic annotation /// 0017077 // oxidative phosphorylation uncoupler activity // inferred from sequence or structural similarity /// 0022857 // transmembrane transporter activity // inferred from sequence or structural similarity	---	---	---	---	This probe set was annotated using the Matching Probes based pipeline to a Entrez Gene identifier using 2 transcripts. // false // Matching Probes // A	BT023820(14),NM_133018(14)
1624323_at	pearson	0.6023	0.490943	4.46372	3.13761	8.00825e-05	0.0449174	0.0449174	0.00371975	0.371828	0.371828	1624323_at	1624323_at	---	39781	Flybase	CG32924-RA	CG32924-RA /FEA=BDGP /GEN=Cec2 /DB_XREF=CG32924 FBgn0000281 /SEG=chr3R:+26027990,26028230 /MAP=99E2-99E2 /LEN=201 /DEF=(CG32924 gene symbol:Cec2 synonyms:(CR32924) FBgn0000281 )	CG32924-RA	---	---	April 2004 (BDGP v4.0)	chr3R:26038624-26038864 (+) // 100.0 //	---	---	---	---	FBgn0000281	---	---	---	---	---	NR_002089	---	---	---	---	---	---	0006959 // humoral immune response // inferred from sequence or structural similarity	0005615 // extracellular space // inferred by curator	---	---	---	---	---	This probe set was annotated using the Matching Probes based pipeline to a Entrez Gene identifier using 1 transcripts. // false // Matching Probes // A	NR_002089(14)
1637056_s_at	pearson	-0.342221	0.304815	-2.15471	1.78194	0.0381476	0.0450244	1.22656	0.0845587	0.870239	0.870239	1637056_s_at	1637056_s_at	FBgn0034500	2008-11-29	Flybase	CG11200-RB	CG11200-RB /FEA=BDGP /GEN=CG11200 /DB_XREF=CG11200 FBgn0034500 /SEG=chr2R:-15368226,15372377 /MAP=56F16-56F16 /LEN=1684 /DEF=(CG11200 gene symbol:CG11200 FBgn0034500 (GO:0004090 carbonyl reductase (NADPH)))	CG11200-RB	---	---	April 2004 (BDGP v4.0)	chr2R:16192019-16196170 (-) // 100.0 //	CG11200	CG11200	---	full length	FBgn0034500	37301	Q7K0F7	EC:1.1.1.184	---	NP_611471 /// NP_725952	NM_137627 /// NM_166388	FBgn0034500	---	---	---	---	---	0008152 // metabolic process // inferred from electronic annotation /// 0055114 // oxidation reduction // inferred from electronic annotation	---	0003824 // catalytic activity // inferred from electronic annotation /// 0004090 // carbonyl reductase (NADPH) activity // inferred from sequence or structural similarity /// 0004090 // carbonyl reductase (NADPH) activity // inferred from electronic annotation /// 0005488 // binding // inferred from electronic annotation /// 0016491 // oxidoreductase activity // inferred from electronic annotation	---	---	FBtr0086299 // span:2-21 // numtm:1 /// FBtr0086300 // span:2-21 // numtm:1 /// NP_611471.1 // span:2-21 // numtm:1 /// NP_725952.1 // span:2-21 // numtm:1 /// AAL47985.1 // span:2-21 // numtm:1 /// GENSCAN00000003475 // span:2-21 // numtm:1 /// FBpp0085612 // span:2-21 // numtm:1 /// FBpp0085611 // span:2-21 // numtm:1	---	This probe set was annotated using the Matching Probes based pipeline to a Entrez Gene identifier using 3 transcripts. // false // Matching Probes // A	AY070514(14),NM_137627(14),NM_166388(14)
1638879_a_at	pearson	0.342536	0.202992	2.15696	1.15424	0.0379587	0.0451551	1.22438	0.257222	0.956506	0.956506	1638879_a_at	1638879_a_at	FBgn0053012	39781	Flybase	CG33012-RA	CG33012-RA /FEA=BDGP /GEN=CG33012 /DB_XREF=CG33012 FBgn0053012 /SEG=chr2R:+7432110,7435546 /MAP=49A1-49A1 /LEN=2634 /DEF=(CG33012 gene symbol:CG33012 synonyms:(CG13161 CG30041) FBgn0053012 )	CG33012-RA	---	---	April 2004 (BDGP v4.0)	chr2R:8254902-8258338 (+) // 100.0 //	CG33012	CG33012	---	full length	FBgn0053012	36342	A1Z8X8 /// A1Z8X9	---	---	NP_788334 /// NP_788335	NM_176154 /// NM_176155	FBgn0053012	---	---	---	---	---	0006508 // proteolysis // inferred from electronic annotation	---	0008233 // peptidase activity // inferred from electronic annotation	---	---	FBtr0087909 // span:65-87,374-396,417-439,454-476,489-511,515-534,541-570,585-607,614-636 // numtm:9 /// FBtr0087910 // span:65-87,380-402,423-445,460-482,495-517,521-540,547-576,591-613,620-642 // numtm:9 /// NP_788334.1 // span:65-87,374-396,417-439,454-476,489-511,515-534,541-570,585-607,614-636 // numtm:9 /// NP_788335.1 // span:65-87,380-402,423-445,460-482,495-517,521-540,547-576,591-613,62…	---	This probe set was annotated using the Matching Probes based pipeline to a Entrez Gene identifier using 2 transcripts. // false // Matching Probes // A	NM_176154(14),NM_176155(14)
1632679_s_at	pearson	0.381536	0.0414731	2.44192	0.231111	0.0198034	0.0454606	0.999678	0.818747	1.00086	1.00086	1632679_s_at	1632679_s_at	FBgn0028642	2008-11-29	Flybase	CG12833-RB	CG12833-RB /FEA=BDGP /GEN=esn /DB_XREF=CG12833 FBgn0028642 /SEG=chr2R:+2147215,2188772 /MAP=42F1-42F3 /LEN=4296 /DEF=(CG12833 gene symbol:esn FBgn0028642 )	CG12833-RB	---	---	April 2004 (BDGP v4.0)	chr2R:2973818-3015375 (+) // 100.0 //	espinas	esn	chr2-	full length	FBgn0028642	53557	Q9U1I1	---	---	NP_524990 /// NP_724533	NM_080251 /// NM_165507	FBgn0028642	---	---	---	---	---	---	0005622 // intracellular // inferred from electronic annotation	0008270 // zinc ion binding // inferred from electronic annotation /// 0046872 // metal ion binding // inferred from electronic annotation	---	---	---	---	This probe set was annotated using the Matching Probes based pipeline to a Entrez Gene identifier using 4 transcripts. // false // Matching Probes // A	AJ251892(13),BT030763(13),NM_080251(14),NM_165507(14)
1638789_at	pearson	-0.342211	-0.0503371	-2.15464	-0.280621	0.0381536	0.0454995	1.22285	0.780865	1.00467	1.00467	1638789_at	1638789_at	FBgn0020439	2008-11-29	Flybase	CG6544-RC	CG6544-RC /FEA=BDGP /GEN=fau /DB_XREF=CG6544 FBgn0020439 /SEG=chr3R:-6599271,6603101 /MAP=86C6-86C6 /LEN=672 /DEF=(CG6544 gene symbol:fau FBgn0020439 )	CG6544-RC	---	---	April 2004 (BDGP v4.0)	chr3R:6599253-6603083 (-) // 100.0 //	fau	fau	---	full length	FBgn0020439	41291	Q9VGX3	---	---	NP_650015 /// NP_731504 /// NP_731505 /// NP_731506	NM_141758 /// NM_169360 /// NM_169361 /// NM_169362	FBgn0020439	---	---	---	---	---	0006950 // response to stress // inferred from electronic annotation /// 0006979 // response to oxidative stress // inferred from direct assay	---	0005515 // protein binding // inferred from physical interaction	---	---	---	---	This probe set was annotated using the Matching Probes based pipeline to a Entrez Gene identifier using 3 transcripts. // false // Matching Probes // A	AF154418(14),AY119569(14),NM_169361(14)
1627943_at	pearson	-0.385066	-0.472482	-2.46843	-2.98485	0.0186008	0.045559	0.998905	0.00549552	0.433459	0.433459	1627943_at	1627943_at	FBgn0044050	2008-11-29	Flybase	CG14167-RA	CG14167-RA /FEA=BDGP /GEN=CG14167 /DB_XREF=CG14167 FBgn0036047 /SEG=chr3L:-9757885,9759578 /MAP=67C8-67C8 /LEN=381 /DEF=(CG14167 gene symbol:CG14167 FBgn0036047 (GO:0005158 insulin receptor binding))	CG14167-RA	---	---	April 2004 (BDGP v4.0)	chr3L:9794714-9795149 (-) // 95.28 //	Drosophila insulin-like peptide 3	Ilp3	---	full length	FBgn0044050	39151	Q4V6A0 /// Q4V6B2 /// Q9VT52	---	---	NP_648360	NM_140103	FBgn0044050	---	---	---	---	---	0008286 // insulin receptor signaling pathway // inferred from sequence or structural similarity	0005576 // extracellular region // inferred from sequence or structural similarity /// 0005576 // extracellular region // inferred from electronic annotation	0005158 // insulin receptor binding // inferred from sequence or structural similarity /// 0005179 // hormone activity // inferred from electronic annotation	---	---	FBtr0076373 // span:12-31 // numtm:1 /// NP_648360.2 // span:12-31 // numtm:1 /// AAY54822.1 // span:12-31 // numtm:1 /// GENSCAN00000005156 // span:7-26 // numtm:1 /// FBpp0076102 // span:12-31 // numtm:1	---	This probe set was annotated using the Matching Probes based pipeline to a Entrez Gene identifier using 1 transcripts. // false // Matching Probes // A	NM_140103(13)
1628744_s_at	pearson	-0.342125	0.132143	-2.15403	0.742251	0.038205	0.0457282	1.22063	0.463522	0.986243	0.986243	1628744_s_at	1628744_s_at	FBgn0015808	2008-11-29	Flybase	CG17597-RA	CG17597-RA /FEA=BDGP /GEN=CG17597 /DB_XREF=CG17597 FBgn0032715 /SEG=chr2L:-18807088,18809224 /MAP=37B1-37B1 /LEN=1752 /DEF=(CG17597 gene symbol:CG17597 FBgn0032715 (GO:0004770 sterol carrier protein X-related thiolase) (GO:0003988 acetyl-CoA C-acyltransferase))	CG17597-RA	---	---	April 2004 (BDGP v4.0)	chr2L:18831720-18832999 (+) // 63.13 // /// chr2L:18829005-18831141 (-) // 100.0 //	CG17597 /// sterol carrier protein X-related thiolase	CG17597 /// ScpX	chr2-	full length	FBgn0015808 /// FBgn0032715	35140 /// 44183	Q24506 /// Q24507 /// Q9VJ43 /// Q9VJ44	EC:2.3.1.16	---	NP_524715 /// NP_609912	NM_079976 /// NM_136068	FBgn0015808 /// FBgn0032715	---	---	---	---	---	0008152 // metabolic process // inferred from electronic annotation /// 0015914 // phospholipid transport // inferred from sequence or structural similarity	0005737 // cytoplasm // inferred from sequence or structural similarity /// 0005739 // mitochondrion // inferred from sequence or structural similarity /// 0005777 // peroxisome // inferred from sequence or structural similarity /// 0005811 // lipid particle // inferred from direct assay	0003824 // catalytic activity // inferred from electronic annotation /// 0003988 // acetyl-CoA C-acyltransferase activity // inferred from sequence or structural similarity /// 0003988 // acetyl-CoA C-acyltransferase activity // inferred from electronic annotation /// 0004770 // sterol carrier protein X-related thiolase activity // inferred from sequence or structural similarity /// 0004770 // st…	---	IPR002155 // Thiolase // 2.7E-4	---	---	This probe set was annotated using the Matching Probes based pipeline to a Entrez Gene identifier using 3 transcripts. // true // Matching Probes // A	FBtr0081121(14),FBtr0081109(14),NM_136068(14),NM_079976(14),X95443(11),AY089539(14),GENSCAN00000017368(14),GENSCAN00000017378(14),FBtr0081121(14),FBtr0081109(14)
1634739_a_at	pearson	-0.341869	-0.0244295	-2.1522	-0.136059	0.038359	0.0458473	1.22168	0.892655	0.994729	0.994729	1634739_a_at	1634739_a_at	FBgn0003071	2008-11-29	Flybase	CG4001-RA	CG4001-RA /FEA=BDGP /GEN=Pfk /DB_XREF=CG4001 FBgn0003071 /SEG=chr2R:+5170372,5177824 /MAP=46E8-46F1 /LEN=3271 /DEF=(CG4001 gene symbol:Pfk FBgn0003071 (GO:0003872 6-phosphofructokinase) (GO:0006096 glycolysis))	CG4001-RA	---	---	April 2004 (BDGP v4.0)	chr2R:5997244-6004696 (+) // 100.0 //	6-phosphofructokinase	Pfk	chr2-85.2	full length	FBgn0003071	36060	P52034	EC:2.7.1.11	---	NP_523676 /// NP_724890 /// NP_724891	NM_078952 /// NM_165746 /// NM_165747	FBgn0003071	---	---	---	---	---	0006096 // glycolysis // inferred from electronic annotation /// 0006096 // glycolysis // non-traceable author statement	0005737 // cytoplasm // inferred from electronic annotation /// 0005945 // 6-phosphofructokinase complex // inferred from electronic annotation	0000166 // nucleotide binding // inferred from electronic annotation /// 0003824 // catalytic activity // inferred from electronic annotation /// 0003872 // 6-phosphofructokinase activity // inferred from sequence or structural similarity /// 0003872 // 6-phosphofructokinase activity // inferred from electronic annotation /// 0005524 // ATP binding // inferred from electronic annotation /// 00163…	---	---	---	---	This probe set was annotated using the Matching Probes based pipeline to a Entrez Gene identifier using 4 transcripts. // false // Matching Probes // A	AF145673(12),NM_078952(14),NM_165746(14),NM_165747(14)
1633975_s_at	pearson	-0.341844	0.112199	-2.15202	0.628665	0.0383745	0.0460457	1.21833	0.534174	0.987009	0.987009	1633975_s_at	1633975_s_at	FBgn0033495	2008-11-29	Flybase	CG12214-RB	CG12214-RB /FEA=BDGP /GEN=CG12214 /DB_XREF=CG12214 FBgn0033495 /SEG=chr2R:-5217002,5219513 /MAP=46F3-46F3 /LEN=2511 /DEF=(CG12214 gene symbol:CG12214 FBgn0033495 )	CG12214-RB	---	---	April 2004 (BDGP v4.0)	chr2R:6043879-6046385 (-) // 99.8 //	CG12214	CG12214	---	full length	FBgn0033495	36072	Q7K549	---	---	NP_610562 /// NP_724901	NM_136718 /// NM_165754	FBgn0033495	---	---	---	---	---	---	---	0005515 // protein binding // inferred from electronic annotation	---	---	---	---	This probe set was annotated using the Matching Probes based pipeline to a Entrez Gene identifier using 3 transcripts. // false // Matching Probes // A	AY051458(14),NM_136718(14),NM_165754(14)
1633885_s_at	pearson	-0.341732	0.0411603	-2.15122	0.229365	0.038442	0.0462092	1.21665	0.820091	0.999715	0.999715	1633885_s_at	1633885_s_at	FBgn0037955	2008-11-29	Flybase	CG6950-RC	CG6950-RC /FEA=BDGP /GEN=CG6950 /DB_XREF=CG6950 FBgn0037955 /SEG=chr3R:-7646120,7648228 /MAP=86F9-86F9 /LEN=1446 /DEF=(CG6950 gene symbol:CG6950 FBgn0037955 (GO:0016212 kynurenine-oxoglutarate aminotransferase))	CG6950-RC	---	---	April 2004 (BDGP v4.0)	chr3R:7646102-7648210 (-) // 100.0 //	CG6950	CG6950	---	full length	FBgn0037955	41433	Q8IGP9 /// Q8SXC2	EC:2.6.1.7 /// EC:4.4.1.14	---	NP_650121 /// NP_731643 /// NP_731644 /// NP_788640	NM_141864 /// NM_169437 /// NM_169438 /// NM_176463	FBgn0037955	---	---	---	---	---	0009058 // biosynthetic process // inferred from electronic annotation	---	0003824 // catalytic activity // inferred from electronic annotation /// 0005515 // protein binding // inferred from physical interaction /// 0008483 // transaminase activity // inferred from electronic annotation /// 0016212 // kynurenine-oxoglutarate transaminase activity // inferred from sequence or structural similarity /// 0016212 // kynurenine-oxoglutarate transaminase activity // inferred …	---	IPR004839 // Aminotransferase, class I and II // 4.5E-27	---	---	This probe set was annotated using the Matching Probes based pipeline to a Entrez Gene identifier using 5 transcripts. // false // Matching Probes // A	AY094691(14),NM_141864(14),NM_169437(14),NM_169438(14),NM_176463(14)
1635030_at	pearson	0.341697	0.419901	2.15098	2.57601	0.0384628	0.046339	1.2135	0.0149832	0.614921	0.614921	1635030_at	1635030_at	FBgn0033945	2008-11-29	Flybase	CG12868-RA	CG12868-RA /FEA=BDGP /GEN=CG12868 /DB_XREF=CG12868 FBgn0033945 /SEG=chr2R:-9668361,9668853 /MAP=51B6-51B6 /LEN=492 /DEF=(CG12868 gene symbol:CG12868 FBgn0033945 )	CG12868-RA	---	---	April 2004 (BDGP v4.0)	chr2R:10492140-10492632 (-) // 100.0 //	CG12868	CG12868	---	full length	FBgn0033945	36620	A1Z9S2 /// Q4V4P1	---	---	NP_610971	NM_137127	FBgn0033945	---	---	---	---	---	---	---	---	---	---	---	---	This probe set was annotated using the Matching Probes based pipeline to a Entrez Gene identifier using 1 transcripts. // false // Matching Probes // A	NM_137127(14)
1624512_at	pearson	-0.341664	-0.174162	-2.15074	-0.984744	0.0384828	0.0465576	1.21035	0.332374	0.959853	0.959853	1624512_at	1624512_at	FBgn0085415	2008-11-29	Flybase	CG14497-RA	CG14497-RA /FEA=BDGP /GEN=CG14497 /DB_XREF=CG14497 FBgn0034298 /SEG=chr2R:+13156292,13157201 /MAP=55B4-55B4 /LEN=783 /DEF=(CG14497 gene symbol:CG14497 FBgn0034298 )	CG14497-RA	---	---	April 2004 (BDGP v4.0)	chr2R:13980063-13980972 (+) // 100.0 //	CG14496	CG34386	---	full length	FBgn0085415	5740303	Q1ECA0	---	---	NP_001097362	NM_001103892	FBgn0085415	---	---	---	---	---	---	---	---	---	---	---	---	This probe set was annotated using the Matching Probes based pipeline to a Entrez Gene identifier using 2 transcripts. // false // Matching Probes // A	BT025834(14),NM_001103892(14)
1637990_s_at	pearson	-0.384184	-0.130963	-2.46179	-0.735506	0.0188955	0.0467	0.998793	0.46756	0.985899	0.985899	1637990_s_at	1637990_s_at	FBgn0011205	2008-11-29	Flybase	CG5725-RB	CG5725-RB /FEA=BDGP /GEN=fbl /DB_XREF=CG5725 FBgn0011205 /SEG=chr3L:+20302986,20309992 /MAP=77B9-77C1 /LEN=1890 /DEF=(CG5725 gene symbol:fbl FLAGGED_PROBLEMATIC FBgn0011205 (GO:0004594 pantothenate kinase) (GO:0005737 cytoplasm) (GO:0005819 spindle) (GO:0016288 cytokinesis) (GO:0005886 plasma membrane) (GO:0016044 membrane organization and biogenesis) (GO:0007126 meiosis) (GO:0007059 chromosome s…	CG5725-RB	---	---	April 2004 (BDGP v4.0)	chr3L:20377548-20384554 (+) // 100.0 //	fumble	fbl	---	full length	FBgn0011205	46234	Q6IDG4 /// Q8I0S6 /// Q9NHN2 /// Q9VPG4 /// Q9VPG5	EC:2.7.1.33	---	NP_524870 /// NP_597678 /// NP_620550 /// NP_730526 /// NP_730527	NM_080131 /// NM_133434 /// NM_138997 /// NM_168851 /// NM_168852	FBgn0011205	---	---	---	---	---	0000910 // cytokinesis // inferred from mutant phenotype /// 0000910 // cytokinesis // non-traceable author statement /// 0007059 // chromosome segregation // inferred from mutant phenotype /// 0007067 // mitosis // inferred from mutant phenotype /// 0007126 // meiosis // inferred from mutant phenotype /// 0007283 // spermatogenesis // inferred from mutant phenotype /// 0015937 // coenzyme A bios…	0005737 // cytoplasm // inferred from direct assay /// 0005819 // spindle // inferred from direct assay /// 0005886 // plasma membrane // inferred from direct assay	0004594 // pantothenate kinase activity // inferred from sequence or structural similarity /// 0004594 // pantothenate kinase activity // inferred from electronic annotation /// 0005515 // protein binding // inferred from physical interaction /// 0005524 // ATP binding // inferred from electronic annotation /// 0016740 // transferase activity // inferred from electronic annotation	---	---	---	---	This probe set was annotated using the Matching Probes based pipeline to a Entrez Gene identifier using 8 transcripts. // false // Matching Probes // A	AF221546(14),BT001335(13),BT015256(13),NM_080131(14),NM_133434(14),NM_138997(14),NM_168851(14),NM_168852(14)
1633589_a_at	pearson	-0.341653	-0.110689	-2.15066	-0.620101	0.0384893	0.0467896	1.20679	0.539723	0.987504	0.987504	1633589_a_at	1633589_a_at	FBgn0030258	2008-11-29	Flybase	CG1552-RB	CG1552-RB /FEA=BDGP /GEN=CG1552 /DB_XREF=CG1552 FBgn0030258 /SEG=chrX:-10794273,10795455 /MAP=10A3-10A3 /LEN=817 /DEF=(CG1552 gene symbol:CG1552 FBgn0030258 )	CG1552-RB	---	---	April 2004 (BDGP v4.0)	chrX:10946367-10947549 (-) // 100.0 //	CG1552	CG1552	---	full length	FBgn0030258	32035	Q9VZ40	---	---	NP_572676 /// NP_727479	NM_132448 /// NM_167263	FBgn0030258	---	---	---	---	---	---	---	---	---	---	FBtr0073396 // span:7-26 // numtm:1 /// FBtr0073397 // span:7-26 // numtm:1 /// NP_572676.2 // span:7-26 // numtm:1 /// NP_727479.1 // span:7-26 // numtm:1 /// AAL13609.1 // span:7-26 // numtm:1 /// FBpp0073253 // span:7-26 // numtm:1 /// FBpp0073252 // span:7-26 // numtm:1	---	This probe set was annotated using the Matching Probes based pipeline to a Entrez Gene identifier using 2 transcripts. // false // Matching Probes // A	NM_132448(14),NM_167263(14)
1629346_at	pearson	-0.341525	-0.0516636	-2.14974	-0.288035	0.0385673	0.0469977	1.2055	0.775237	1.00459	1.00459	1629346_at	1629346_at	FBgn0039620	2008-11-29	Flybase	CG1443-RA	CG1443-RA /FEA=BDGP /GEN=CG1443 /DB_XREF=CG1443 FBgn0039620 /SEG=chr3R:-24808064,24835494 /MAP=98F5-98F5 /LEN=2274 /DEF=(CG1443 gene symbol:CG1443 FBgn0039620 )	CG1443-RA	---	---	April 2004 (BDGP v4.0)	chr3R:24818698-24846128 (-) // 100.0 //	CG1443	CG1443	---	full length	FBgn0039620	43420	Q8MS59	---	---	NP_651652	NM_143395	FBgn0039620	---	---	---	---	---	0008152 // metabolic process // inferred from electronic annotation	---	0003824 // catalytic activity // inferred from electronic annotation /// 0005488 // binding // inferred from electronic annotation	---	IPR001509 // NAD-dependent epimerase/dehydratase // 0.0064	FBtr0085345 // span:377-399,492-511 // numtm:2 /// NP_651652.2 // span:377-399,492-511 // numtm:2 /// AAM50938.1 // span:377-399,492-511 // numtm:2 /// FBpp0084714 // span:377-399,492-511 // numtm:2	---	This probe set was annotated using the Matching Probes based pipeline to a Entrez Gene identifier using 2 transcripts. // false // Matching Probes // A	AY119078(14),NM_143395(14)
1638091_at	pearson	0.341216	-0.134714	2.14755	-0.756954	0.0387546	0.0470216	1.20761	0.454793	0.982578	0.982578	1638091_at	1638091_at	FBgn0032647	39781	Flybase	CG15143-RA	CG15143-RA /FEA=BDGP /GEN=CG15143 /DB_XREF=CG15143 FBgn0032647 /SEG=chr2L:-17498971,17502632 /MAP=36C10-36C10 /LEN=3516 /DEF=(CG15143 gene symbol:CG15143 FBgn0032647 )	CG15143-RA	---	---	April 2004 (BDGP v4.0)	chr2L:17520888-17524549 (-) // 100.0 //	CG15143	CG15143	---	full length	FBgn0032647	35062	Q8T3P9 /// Q9VJC5	---	---	NP_609848	NM_136004	FBgn0032647	---	---	---	---	---	---	---	0005515 // protein binding // inferred from physical interaction	---	---	---	---	This probe set was annotated using the Matching Probes based pipeline to a Entrez Gene identifier using 1 transcripts. // false // Matching Probes // A	NM_136004(14)
1632532_s_at	pearson	-0.341148	0.0441909	-2.14706	0.246285	0.0387956	0.0472873	1.20517	0.807085	1.00312	1.00312	1632532_s_at	1632532_s_at	FBgn0010516	2008-11-29	Flybase	CG8996-RA	CG8996-RA /FEA=BDGP /GEN=wal /DB_XREF=CG8996 FBgn0010516 /SEG=chr2R:-6753639,6755588 /MAP=48C1-48C2 /LEN=1233 /DEF=(CG8996 gene symbol:wal FBgn0010516 (GO:0008246 electron transfer flavoprotein) (GO:0005759 mitochondrial matrix) (GO:0017133 electron transfer flavoprotein complex (sensu Eukarya)))	CG8996-RA	---	---	April 2004 (BDGP v4.0)	chr2R:7576431-7578380 (-) // 100.0 //	Electron transfer flavoprotein	wal	chr2-59	full length	FBgn0010516	36252	Q7KLW5 /// Q7KN94	---	---	NP_476975 /// NP_725073	NM_057627 /// NM_165847	FBgn0010516	---	---	---	---	---	0002009 // morphogenesis of an epithelium // inferred from mutant phenotype /// 0006119 // oxidative phosphorylation // inferred from sequence or structural similarity /// 0007424 // open tracheal system development // inferred from mutant phenotype /// 0007443 // Malpighian tubule morphogenesis // inferred from mutant phenotype /// 0008258 // head involution // inferred from mutant phenotype ///…	0005759 // mitochondrial matrix // inferred from sequence or structural similarity /// 0005811 // lipid particle // inferred from direct assay /// 0017133 // mitochondrial electron transfer flavoprotein complex // inferred from sequence or structural similarity	0009055 // electron carrier activity // inferred from sequence or structural similarity /// 0009055 // electron carrier activity // inferred from electronic annotation /// 0050660 // FAD binding // inferred from electronic annotation	---	---	---	---	This probe set was annotated using the Matching Probes based pipeline to a Entrez Gene identifier using 2 transcripts. // false // Matching Probes // A	NM_057627(14),NM_165847(14)
1641146_at	pearson	-0.341142	-0.150722	-2.14702	-0.848884	0.0387994	0.0473949	1.20159	0.402454	0.978134	0.978134	1641146_at	1641146_at	FBgn0003515	2008-11-29	Flybase	CG4314-RA	CG4314-RA /FEA=BDGP /GEN=st /DB_XREF=CG4314 FBgn0003515 /SEG=chr3L:+16446532,16449346 /MAP=73A3-73A3 /LEN=2150 /DEF=(CG4314 gene symbol:st FBgn0003515 (GO:0005395 eye pigment precursor transporter) (GO:0006726 eye pigment biosynthesis) (GO:0006727 ommochrome biosynthesis) (GO:0004009 ATP-binding cassette (ABC) transporter) (GO:0006856 eye pigment precursor transport) (GO:0005887 integral to plasm…	CG4314-RA	---	---	April 2004 (BDGP v4.0)	chr3L:16490753-16493567 (+) // 100.0 //	scarlet	st	chr3-44.0	full length	FBgn0003515	39836	P45843	EC:3.6.1.3	---	NP_524108	NM_079384	FBgn0003515	---	---	---	---	---	0006726 // eye pigment biosynthetic process // non-traceable author statement /// 0006727 // ommochrome biosynthetic process // inferred from mutant phenotype /// 0006727 // ommochrome biosynthetic process // non-traceable author statement /// 0006810 // transport // inferred from electronic annotation /// 0006856 // eye pigment precursor transport // traceable author statement	0005887 // integral to plasma membrane // non-traceable author statement /// 0016020 // membrane // inferred from electronic annotation /// 0016021 // integral to membrane // inferred from electronic annotation /// 0043190 // ATP-binding cassette (ABC) transporter complex // inferred from sequence or structural similarity	0000166 // nucleotide binding // inferred from electronic annotation /// 0005395 // eye pigment precursor transporter activity // non-traceable author statement /// 0005524 // ATP binding // inferred from electronic annotation /// 0016887 // ATPase activity // inferred from electronic annotation /// 0017111 // nucleoside-triphosphatase activity // inferred from electronic annotation /// 0031409 /…	---	---	FBtr0075391 // span:486-508,523-545,552-574,641-660 // numtm:4 /// NP_524108.1 // span:486-508,523-545,552-574,641-660 // numtm:4 /// AAQ23526.1 // span:486-508,523-545,552-574,641-660 // numtm:4 /// FBpp0075149 // span:486-508,523-545,552-574,641-660 // numtm:4	---	This probe set was annotated using the Matching Probes based pipeline to a Entrez Gene identifier using 1 transcripts. // false // Matching Probes // A	NM_079384(14)
1626684_at	pearson	-0.341097	-0.191861	-2.1467	-1.08846	0.038827	0.0474975	1.19877	0.284784	0.958392	0.958392	1626684_at	1626684_at	FBgn0036145	2008-11-29	Flybase	CG7607-RA	CG7607-RA /FEA=BDGP /GEN=CG7607 /DB_XREF=CG7607 FBgn0036145 /SEG=chr3L:+11157149,11158120 /MAP=68B1-68B1 /LEN=671 /DEF=(CG7607 gene symbol:CG7607 FBgn0036145 )	CG7607-RA	---	---	April 2004 (BDGP v4.0)	chr3L:11192717-11193688 (+) // 100.0 //	CG7607	CG7607	---	full length	FBgn0036145	39263	Q8SWY5 /// Q9VTG8	---	---	NP_648449	NM_140192	FBgn0036145	---	---	---	---	---	---	---	---	---	---	FBtr0076163 // span:7-29 // numtm:1 /// NP_648449.1 // span:7-29 // numtm:1 /// AAM11303.1 // span:7-29 // numtm:1 /// GENSCAN00000013744 // span:7-29 // numtm:1 /// FBpp0075894 // span:7-29 // numtm:1	---	This probe set was annotated using the Matching Probes based pipeline to a Entrez Gene identifier using 1 transcripts. // false // Matching Probes // A	NM_140192(14)
1638387_at	pearson	-0.599027	-0.683092	-4.42583	-5.20762	8.96117e-05	0.0476168	0.0476168	1.18422e-05	0.0149449	0.0149449	1638387_at	1638387_at	FBgn0041702	2008-11-29	Flybase	CG15107-RA	CG15107-RA /FEA=BDGP /GEN=CG15107 /DB_XREF=CG15107 FBgn0041702 /SEG=chr2R:-14035028,14036158 /MAP=56A2-56A2 /LEN=1007 /DEF=(CG15107 gene symbol:CG15107 FBgn0041702 )	CG15107-RA	---	---	April 2004 (BDGP v4.0)	chr2R:14858813-14859943 (-) // 100.0 //	CG15107	CG15107	---	full length	FBgn0041702	59128	Q7JW01	---	---	NP_660193	NM_145192	FBgn0041702	---	---	---	---	---	---	---	---	---	---	---	---	This probe set was annotated using the Matching Probes based pipeline to a Entrez Gene identifier using 2 transcripts. // false // Matching Probes // A	AY118514(14),NM_145192(14)
1624657_at	pearson	0.341043	0.418721	2.14632	2.56723	0.0388595	0.0476355	1.19612	0.0152984	0.617809	0.617809	1624657_at	1624657_at	---	2008-11-29	Flybase	HDC14780	HDC14780 /FEA=HDP /SEG=chr3R:-17041963,17042925	HDC14780	---	---	April 2004 (BDGP v4.0)	chr3R:17041946-17042908 (-) // 100.0 //	---	---	---	---	---	---	---	---	---	---	---	---	---	---	---	---	---	---	---	---	---	IPR001214 // Nuclear protein SET // 2.2E-6	---	---	This probe set was annotated using the Genome Target Overlap based pipeline to a ENSEMBL identifier using 1 transcripts. // false // Genome Target Overlap // B	GENSCAN00000016360
1625652_s_at	pearson	0.34092	0.461347	2.14544	2.89519	0.0389345	0.047768	1.19478	0.00688486	0.482705	0.482705	1625652_s_at	1625652_s_at	FBgn0039543	2008-11-29	Flybase	CG12428-RB	CG12428-RB /FEA=BDGP /GEN=CG12428 /DB_XREF=CG12428 FBgn0039543 /SEG=chr3R:-23518463,23521833 /MAP=98B2-98B2 /LEN=2406 /DEF=(CG12428 gene symbol:CG12428 FBgn0039543 (GO:0005777 peroxisome) (GO:0008458 carnitine O-octanoyltransferase))	CG12428-RB	---	---	April 2004 (BDGP v4.0)	chr3R:23529098-23532468 (-) // 100.0 //	CG12428	CG12428	---	full length	FBgn0039543	43332	Q8SWX9 /// Q9VB02	EC:2.3.1.137	---	NP_651583 /// NP_733230 /// NP_733231 /// NP_733232 /// NP_733233	NM_143326 /// NM_170351 /// NM_170352 /// NM_170353 /// NM_170354	FBgn0039543	---	---	---	---	---	---	0005777 // peroxisome // inferred from sequence or structural similarity	0005515 // protein binding // inferred from physical interaction /// 0008415 // acyltransferase activity // inferred from electronic annotation /// 0008458 // carnitine O-octanoyltransferase activity // inferred from sequence or structural similarity /// 0008458 // carnitine O-octanoyltransferase activity // inferred from electronic annotation /// 0016740 // transferase activity // inferred from …	---	---	---	---	This probe set was annotated using the Matching Probes based pipeline to a Entrez Gene identifier using 6 transcripts. // false // Matching Probes // A	AY069851(14),NM_143326(14),NM_170351(14),NM_170352(14),NM_170353(14),NM_170354(14)
1626386_at	pearson	-0.340744	-0.316006	-2.14418	-1.85447	0.0390426	0.0479181	1.19447	0.0732062	0.841788	0.841788	1626386_at	1626386_at	FBgn0034517	2008-11-29	Flybase	CG18066-RA	CG18066-RA /FEA=BDGP /GEN=CG18066 /DB_XREF=CG18066 FBgn0034517 /SEG=chr2R:-15612964,15613797 /MAP=57A5-57A5 /LEN=699 /DEF=(CG18066 gene symbol:CG18066 FBgn0034517 )	CG18066-RA	---	---	April 2004 (BDGP v4.0)	chr2R:16436757-16437590 (-) // 100.0 //	CG18066	Cpr57A	---	full length	FBgn0034517	37319	Q7K5J8	---	---	NP_611489	NM_137645	FBgn0034517	---	---	---	---	---	---	---	0005214 // structural constituent of chitin-based cuticle // inferred from sequence or structural similarity /// 0042302 // structural constituent of cuticle // inferred from electronic annotation	---	---	---	---	This probe set was annotated using the Matching Probes based pipeline to a Entrez Gene identifier using 3 transcripts. // false // Matching Probes // A	AY047580(13),BT029031(14),NM_137645(14)
1626475_at	pearson	-0.340714	-0.167676	-2.14397	-0.946986	0.0390604	0.0481096	1.1914	0.35097	0.962094	0.962094	1626475_at	1626475_at	FBgn0032296	2008-11-29	Flybase	CG6729-RA	CG6729-RA /FEA=BDGP /GEN=CG6729 /DB_XREF=CG6729 FBgn0032296 /SEG=chr2L:-10733194,10736343 /MAP=32A4-32A4 /LEN=2988 /DEF=(CG6729 gene symbol:CG6729 FBgn0032296 )	CG6729-RA	---	---	April 2004 (BDGP v4.0)	chr2L:10740785-10743934 (-) // 100.0 //	CG6729	CG6729	---	full length	FBgn0032296	34484	Q9VKQ6	---	---	NP_609449	NM_135605	FBgn0032296	---	---	---	---	---	---	---	---	---	---	---	---	This probe set was annotated using the Matching Probes based pipeline to a Entrez Gene identifier using 1 transcripts. // false // Matching Probes // A	NM_135605(14)
1634054_at	pearson	-0.340375	-0.18808	-2.14156	-1.06621	0.0392685	0.0482188	1.19414	0.294563	0.958087	0.958087	1634054_at	1634054_at	FBgn0002938	2008-11-29	Flybase	CG5125-RB	CG5125-RB /FEA=BDGP /GEN=ninaC /DB_XREF=CG5125 FBgn0002938 /SEG=chr2L:+7369948,7376575 /MAP=27F3-27F3 /LEN=4827 /DEF=(CG5125 gene symbol:ninaC FBgn0002938 (GO:0007604 phototransduction, UV) (GO:0005737 cytoplasm) (GO:0005860 non-muscle myosin) (GO:0006468 protein amino acid phosphorylation) (GO:0008570 myosin ATPase) (GO:0007010 cytoskeleton organization and biogenesis) (GO:0004702 receptor signa…	CG5125-RB	---	---	April 2004 (BDGP v4.0)	chr2L:7377717-7384344 (+) // 100.0 //	Droninac	ninaC	---	full length	FBgn0002938	34012	P10676	EC:3.6.1.3	---	NP_523503 /// NP_723271	NM_078779 /// NM_164747	FBgn0002938	---	---	---	---	---	0006468 // protein amino acid phosphorylation // inferred from electronic annotation /// 0006468 // protein amino acid phosphorylation // non-traceable author statement /// 0006886 // intracellular protein transport // inferred from mutant phenotype /// 0007010 // cytoskeleton organization and biogenesis // inferred from mutant phenotype /// 0007601 // visual perception // inferred from electroni…	0005737 // cytoplasm // inferred from direct assay /// 0005737 // cytoplasm // inferred from electronic annotation /// 0005856 // cytoskeleton // non-traceable author statement /// 0005856 // cytoskeleton // inferred from electronic annotation /// 0016027 // inaD signaling complex // inferred from physical interaction /// 0016027 // inaD signaling complex // traceable author statement /// 0016028…	0000166 // nucleotide binding // inferred from electronic annotation /// 0003774 // motor activity // inferred from electronic annotation /// 0003779 // actin binding // inferred from electronic annotation /// 0004672 // protein kinase activity // inferred from sequence or structural similarity /// 0004672 // protein kinase activity // inferred from electronic annotation /// 0004674 // protein se…	---	---	---	---	This probe set was annotated using the Matching Probes based pipeline to a Entrez Gene identifier using 1 transcripts. // false // Matching Probes // A	NM_078779(14)
1627829_at	pearson	-0.340177	-0.147827	-2.14015	-0.832207	0.0393901	0.0483564	1.19424	0.411657	0.977674	0.977674	1627829_at	1627829_at	FBgn0003249	2008-11-29	Flybase	CG10888-RA	CG10888-RA /FEA=BDGP /GEN=Rh3 /DB_XREF=CG10888 FBgn0003249 /SEG=chr3R:-15906788,15908189 /MAP=92C5-92C5 /LEN=1401 /DEF=(CG10888 gene symbol:Rh3 FBgn0003249 (GO:0007186 G-protein coupled receptor protein signaling pathway) (GO:0016021 integral to membrane) (GO:0016016 short-wave-sensitive opsin) (GO:0015053 opsin) (GO:0015064 UV-sensitive opsin) (GO:0009589 perception of UV) (GO:0007602 phototrans…	CG10888-RA	---	---	April 2004 (BDGP v4.0)	chr3R:15906777-15908172 (-) // 99.57 //	rhodopsin	Rh3	---	full length	FBgn0003249	42398	P04950	---	---	NP_524411	NM_079687	FBgn0003249	---	---	---	---	---	0007165 // signal transduction // inferred from electronic annotation /// 0007186 // G-protein coupled receptor protein signaling pathway // inferred from electronic annotation /// 0007186 // G-protein coupled receptor protein signaling pathway // inferred from sequence or structural similarity /// 0007601 // visual perception // inferred from electronic annotation /// 0007602 // phototransductio…	0016020 // membrane // inferred from electronic annotation /// 0016021 // integral to membrane // inferred from electronic annotation /// 0016021 // integral to membrane // inferred from sequence or structural similarity /// 0016021 // integral to membrane // non-traceable author statement	0001584 // rhodopsin-like receptor activity // inferred from electronic annotation /// 0004871 // signal transducer activity // inferred from electronic annotation /// 0004872 // receptor activity // inferred from electronic annotation /// 0004930 // G-protein coupled receptor activity // non-traceable author statement /// 0004930 // G-protein coupled receptor activity // inferred from electronic…	---	---	FBtr0083876 // span:60-82,94-116,131-153,173-195,219-241,287-309,319-341 // numtm:7 /// NP_524411.1 // span:60-82,94-116,131-153,173-195,219-241,287-309,319-341 // numtm:7 /// AAD55735.1 // span:60-82,94-116,131-153,173-195,219-241,287-309,319-341 // numtm:7 /// FBpp0083284 // span:60-82,94-116,131-153,173-195,219-241,287-309,319-341 // numtm:7	---	This probe set was annotated using the Matching Probes based pipeline to a Entrez Gene identifier using 2 transcripts. // false // Matching Probes // A	AF184224(14),NM_079687(14)
1632298_s_at	pearson	-0.34016	0.0105663	-2.14003	0.0588339	0.0394011	0.0485529	1.191	0.953462	0.996909	0.996909	1632298_s_at	1632298_s_at	FBgn0024211	2008-11-29	Flybase	CG3359-RB	CG3359-RB /FEA=BDGP /GEN=mfas /DB_XREF=CG3359 FBgn0024211 /SEG=chr3R:-7810601,7819055 /MAP=87A4-87A4 /LEN=2695 /DEF=(CG3359 gene symbol:mfas FBgn0024211 (GO:0005886 plasma membrane) (GO:0007409 axonogenesis))	CG3359-RB	---	---	April 2004 (BDGP v4.0)	chr3R:7810583-7819037 (-) // 100.0 //	midline fasciclin	mfas	---	full length	FBgn0024211	41455	O61457 /// Q86B94 /// Q86B95 /// Q86B96 /// Q86B97 /// Q9VGE9 /// Q9VGF0	---	---	NP_524324 /// NP_731661 /// NP_788643 /// NP_788644 /// NP_788645 /// NP_788646 /// NP_788647 /// NP_788648 /// NP_788649 /// NP_788650 /// NP_788651 /// NP_788652 /// NP_788653 /// NP_788654 /// NP_788655	NM_079600 /// NM_169444 /// NM_176466 /// NM_176467 /// NM_176468 /// NM_176469 /// NM_176470 /// NM_176471 /// NM_176472 /// NM_176473 /// NM_176474 /// NM_176475 /// NM_176476 /// NM_176477 /// NM_176478	FBgn0024211	---	---	---	---	---	0007409 // axonogenesis // inferred from mutant phenotype	0005886 // plasma membrane // non-traceable author statement	---	---	---	---	---	This probe set was annotated using the Matching Probes based pipeline to a Entrez Gene identifier using 16 transcripts. // false // Matching Probes // A	AY069094(14),NM_079600(14),NM_169444(14),NM_176466(14),NM_176467(14),NM_176468(14),NM_176469(14),NM_176470(14),NM_176471(14),NM_176472(14),NM_176473(14),NM_176474(14),NM_176475(14),NM_176476(14),NM_176477(14),NM_176478(14)
1629179_at	pearson	0.339677	0.0629343	2.1366	0.351099	0.0396992	0.0486352	1.19643	0.727889	0.998067	0.998067	1629179_at	1629179_at	FBgn0032067	2008-11-29	Flybase	CG9465-RA	CG9465-RA /FEA=BDGP /GEN=CG9465 /DB_XREF=CG9465 FBgn0032067 /SEG=chr2L:-8761405,8764404 /MAP=29F1-29F1 /LEN=2829 /DEF=(CG9465 gene symbol:CG9465 FBgn0032067 (GO:0004559 alpha-mannosidase) (GO:0005764 lysosome))	CG9465-RA	---	---	April 2004 (BDGP v4.0)	chr2L:8769174-8772173 (-) // 100.0 //	CG9465	CG9465	---	full length	FBgn0032067	34204	Q9VLI1	EC:3.2.1.24	---	NP_609251	NM_135407	FBgn0032067	---	---	---	---	---	0005975 // carbohydrate metabolic process // inferred from electronic annotation /// 0006013 // mannose metabolic process // inferred from electronic annotation /// 0008152 // metabolic process // inferred from electronic annotation	0005764 // lysosome // inferred from sequence or structural similarity	0003824 // catalytic activity // inferred from electronic annotation /// 0004559 // alpha-mannosidase activity // inferred from sequence or structural similarity /// 0004559 // alpha-mannosidase activity // inferred from electronic annotation /// 0005515 // protein binding // inferred from physical interaction /// 0015923 // mannosidase activity // inferred from electronic annotation /// 0016787 …	---	---	---	---	This probe set was annotated using the Matching Probes based pipeline to a Entrez Gene identifier using 1 transcripts. // false // Matching Probes // A	NM_135407(14)
1635762_at	pearson	0.339659	0.501346	2.13646	3.2261	0.0397107	0.0488093	1.19321	0.00295699	0.339248	0.339248	1635762_at	1635762_at	FBgn0034270	2008-11-29	Flybase	CG6401-RA	CG6401-RA /FEA=BDGP /GEN=CG6401 /DB_XREF=CG6401 FBgn0034270 /SEG=chr2R:-12801576,12803382 /MAP=54E4-54E5 /LEN=1614 /DEF=(CG6401 gene symbol:CG6401 FBgn0034270 (GO:0017176 phosphatidylinositol N-acetylglucosaminyltransferase))	CG6401-RA	---	---	April 2004 (BDGP v4.0)	chr2R:13625356-13627162 (-) // 100.0 //	CG6401	CG6401	---	full length	FBgn0034270	37020	Q7JUM3	EC:2.4.1.198	---	NP_611257	NM_137413	FBgn0034270	---	---	---	---	---	0006506 // GPI anchor biosynthetic process // inferred from sequence or structural similarity /// 0009058 // biosynthetic process // inferred from electronic annotation	0030176 // integral to endoplasmic reticulum membrane // inferred from sequence or structural similarity	0016740 // transferase activity // inferred from electronic annotation /// 0016757 // transferase activity, transferring glycosyl groups // inferred from electronic annotation /// 0017176 // phosphatidylinositol N-acetylglucosaminyltransferase activity // inferred from sequence or structural similarity /// 0017176 // phosphatidylinositol N-acetylglucosaminyltransferase activity // inferred from e…	---	---	FBtr0086882 // span:437-459 // numtm:1 /// NP_611257.1 // span:437-459 // numtm:1 /// AAM52703.1 // span:437-459 // numtm:1 /// GENSCAN00000015718 // span:437-459 // numtm:1 /// FBpp0086042 // span:437-459 // numtm:1	---	This probe set was annotated using the Matching Probes based pipeline to a Entrez Gene identifier using 2 transcripts. // false // Matching Probes // A	AY122191(14),NM_137413(14)
1640744_a_at	pearson	0.339598	0.0711524	2.13603	0.397166	0.0397482	0.0489985	1.1908	0.693966	0.999042	0.999042	1640744_a_at	1640744_a_at	FBgn0034172	2008-11-29	Flybase	CG6665-RA	CG6665-RA /FEA=BDGP /GEN=CG6665 /DB_XREF=CG6665 FBgn0034172 /SEG=chr2R:+12021226,12022656 /MAP=53E2-53E3 /LEN=1366 /DEF=(CG6665 gene symbol:CG6665 FBgn0034172 )	CG6665-RA	---	---	April 2004 (BDGP v4.0)	chr2R:12845006-12846436 (+) // 100.0 //	CG6665	CG6665	---	full length	FBgn0034172	36903	A1ZAM0 /// Q8T9F0	---	---	NP_611171 /// NP_725632	NM_137327 /// NM_166204	FBgn0034172	---	---	---	---	---	---	---	0005515 // protein binding // inferred from physical interaction	---	---	FBtr0087053 // span:33-55 // numtm:1 /// FBtr0087054 // span:32-54 // numtm:1 /// NP_611171.1 // span:33-55 // numtm:1 /// NP_725632.1 // span:32-54 // numtm:1 /// AAL39942.1 // span:33-55 // numtm:1 /// GENSCAN00000002279 // span:32-54 // numtm:1 /// FBpp0086203 // span:32-54 // numtm:1 /// FBpp0086202 // span:33-55 // numtm:1	---	This probe set was annotated using the Matching Probes based pipeline to a Entrez Gene identifier using 3 transcripts. // false // Matching Probes // A	AY069797(14),NM_137327(14),NM_166204(14)
1640313_s_at	pearson	0.339579	0.13382	2.1359	0.751839	0.0397603	0.0493508	1.18763	0.457819	0.984481	0.984481	1640313_s_at	1640313_s_at	FBgn0019925	2008-11-29	Flybase	CG6202-RA	CG6202-RA /FEA=BDGP /GEN=Surf4 /DB_XREF=CG6202 FBgn0019925 /SEG=chr3R:-11169406,11171923 /MAP=88F1-88F1 /LEN=1634 /DEF=(CG6202 gene symbol:Surf4 FBgn0019925 (GO:0005789 endoplasmic reticulum membrane))	CG6202-RA	---	---	April 2004 (BDGP v4.0)	chr3R:11169388-11171905 (-) // 100.0 //	Surfeit 4	Surf4	---	full length	FBgn0019925	41864	O18405	---	---	NP_477222 /// NP_732016	NM_057874 /// NM_169647	FBgn0019925	---	---	---	---	---	---	0005783 // endoplasmic reticulum // inferred from electronic annotation /// 0005789 // endoplasmic reticulum membrane // inferred from sequence or structural similarity /// 0005789 // endoplasmic reticulum membrane // inferred from electronic annotation /// 0016020 // membrane // inferred from electronic annotation /// 0016021 // integral to membrane // inferred from electronic annotation	---	---	---	FBtr0083117 // span:65-87,91-113,118-137,178-200,207-226,241-263 // numtm:6 /// FBtr0083118 // span:65-87,91-113,118-137,178-200,207-226,241-263 // numtm:6 /// NP_477222.1 // span:65-87,91-113,118-137,178-200,207-226,241-263 // numtm:6 /// NP_732016.1 // span:65-87,91-113,118-137,178-200,207-226,241-263 // numtm:6 /// AAM48435.1 // span:65-87,91-113,118-137,178-200,207-226,241-263 // numtm:6 /// …	---	This probe set was annotated using the Matching Probes based pipeline to a Entrez Gene identifier using 3 transcripts. // false // Matching Probes // A	AY118406(14),NM_057874(14),NM_169647(14)
1637412_a_at	pearson	0.338533	0.207766	2.12847	1.1826	0.0404135	0.0493965	1.20004	0.24596	0.958401	0.958401	1637412_a_at	1637412_a_at	FBgn0002306	2008-11-29	Flybase	CG2507-RB	CG2507-RB /FEA=BDGP /GEN=sas /DB_XREF=CG2507 FBgn0002306 /SEG=chr3R:+2988569,3009443 /MAP=84C8-84D1 /LEN=5977 /DEF=(CG2507 gene symbol:sas FBgn0002306 (GO:0005887 integral to plasma membrane) (GO:0004872 receptor) (GO:0016324 apical plasma membrane) (GO:0002168 larval development (sensu Insecta)))	CG2507-RB	---	---	April 2004 (BDGP v4.0)	chr3R:2988550-3009424 (+) // 100.0 //	responsible for dominant phenotype	sas	---	full length	FBgn0002306	40861	Q04164	---	---	NP_476611 /// NP_731141	NM_057263 /// NM_169177	FBgn0002306	---	---	---	---	---	0002168 // instar larval development // inferred from mutant phenotype /// 0007275 // multicellular organismal development // inferred from electronic annotation	0005887 // integral to plasma membrane // non-traceable author statement /// 0016020 // membrane // inferred from electronic annotation /// 0016021 // integral to membrane // inferred from electronic annotation /// 0016324 // apical plasma membrane // non-traceable author statement	0004872 // receptor activity // non-traceable author statement /// 0004872 // receptor activity // inferred from electronic annotation /// 0005515 // protein binding // inferred from physical interaction	---	---	FBtr0081570 // span:1634-1656 // numtm:1 /// FBtr0081571 // span:1289-1311 // numtm:1 /// NP_731141.1 // span:1634-1656 // numtm:1 /// NP_476611.1 // span:1289-1311 // numtm:1 /// AAA28879.1 // span:1289-1311 // numtm:1 /// AAK93403.1 // span:1634-1656 // numtm:1 /// FBpp0081089 // span:1634-1656 // numtm:1 /// FBpp0081090 // span:1289-1311 // numtm:1	---	This probe set was annotated using the Matching Probes based pipeline to a Entrez Gene identifier using 3 transcripts. // false // Matching Probes // A	AY051979(14),NM_057263(14),NM_169177(14)
1637385_a_at	pearson	-0.338207	0.122493	-2.12615	0.687186	0.0406191	0.0495877	1.20261	0.497074	0.988081	0.988081	1637385_a_at	1637385_a_at	FBgn0037230	2008-11-29	Flybase	CG9780-RA	CG9780-RA /FEA=BDGP /GEN=CG9780 /DB_XREF=CG9780 FBgn0037230 /SEG=chr3R:-117994,120557 /MAP=82A3-82A3 /LEN=2178 /DEF=(CG9780 gene symbol:CG9780 FBgn0037230 )	CG9780-RA	---	---	April 2004 (BDGP v4.0)	chr3R:117995-120558 (-) // 100.0 //	CG9780	CG9780	---	full length	FBgn0037230	40540	Q86BB2 /// Q9VN01	EC:3.4.24.11 /// EC:3.6.1.3	---	NP_649449 /// NP_788572	NM_141192 /// NM_176395	FBgn0037230	---	---	---	---	---	0006508 // proteolysis // inferred from electronic annotation	0016020 // membrane // inferred from electronic annotation	0005524 // ATP binding // inferred from electronic annotation /// 0016787 // hydrolase activity // inferred from electronic annotation /// 0016887 // ATPase activity // inferred from electronic annotation /// 0042624 // ATPase activity, uncoupled // inferred from electronic annotation	---	IPR000718 // Peptidase M13, neprilysin // 7.2E-4 /// IPR000718 // Peptidase M13, neprilysin // 6.8E-4	---	---	This probe set was annotated using the Matching Probes based pipeline to a Entrez Gene identifier using 3 transcripts. // false // Matching Probes // A	AY058449(12),NM_141192(14),NM_176395(14)
1639236_at	pearson	0.338041	0.0229471	2.12497	0.127798	0.040724	0.0497278	1.20219	0.899135	0.994268	0.994268	1639236_at	1639236_at	FBgn0040725	39781	Flybase	CG13946-RA	CG13946-RA /FEA=BDGP /GEN=CG13946 /DB_XREF=CG13946 FBgn0040725 /SEG=chr2L:+778200,778557 /MAP=21D2-21D2 /LEN=357 /DEF=(CG13946 gene symbol:CG13946 FBgn0040725 )	CG13946-RA	---	---	April 2004 (BDGP v4.0)	chr2L:776535-776892 (+) // 100.0 //	CG13946	CG13946	---	full length	FBgn0040725	50198	Q9VPS9	---	---	NP_652360	NM_144103	FBgn0040725	---	---	---	---	---	---	---	---	---	---	---	---	This probe set was annotated using the Matching Probes based pipeline to a Entrez Gene identifier using 1 transcripts. // false // Matching Probes // A	NM_144103(14)
1638764_at	pearson	-0.339556	0.0455535	-2.13574	0.253895	0.0397742	0.0497289	1.18454	0.801253	1.00204	1.00204	1638764_at	1638764_at	FBgn0040658	2008-11-29	Flybase	CT32887	CT32887 /FEA=sim4 /SEG=chr2R:+17713149,17713413	CT32887	---	---	April 2004 (BDGP v4.0)	chr2R:18557104-18557368 (+) // 100.0 //	CG13516	CG13516	---	full length	FBgn0040658	3885599	A8E6N5 /// Q2PE16	---	---	NP_001033966	NM_001038877	FBgn0040658	---	---	---	---	---	---	---	---	---	---	FBtr0100554 // span:119-141 // numtm:1 /// NP_001033966.1 // span:119-141 // numtm:1 /// ABV82209.1 // span:119-141 // numtm:1 /// FBpp0100005 // span:119-141 // numtm:1	---	This probe set was annotated using the Matching Probes based pipeline to a Entrez Gene identifier using 1 transcripts. // false // Matching Probes // A	NM_001038877(12)
1635007_at	pearson	0.337435	0.399368	2.12067	2.4254	0.0411093	0.0497947	1.21003	0.0213083	0.67864	0.67864	1635007_at	1635007_at	FBgn0040271	2008-11-29	Flybase	CG6725-RA	CG6725-RA /FEA=BDGP /GEN=Sulf1 /DB_XREF=CG6725 FBgn0040271 /SEG=chr3R:-12136273,12140871 /MAP=89B18-89B18 /LEN=3992 /DEF=(CG6725 gene symbol:Sulf1 FBgn0040271 (GO:0008449 N-acetylglucosamine-6-sulfatase) (GO:0007389 pattern specification))	CG6725-RA	---	---	April 2004 (BDGP v4.0)	chr3R:12136255-12140853 (-) // 100.0 //	Sulfated	Sulf1	---	full length	FBgn0040271	53437	Q9VEX0	EC:3.1.6.14	---	NP_524987	NM_080248	FBgn0040271	---	---	---	---	---	0007389 // pattern specification process // inferred from mutant phenotype /// 0008152 // metabolic process // inferred from sequence or structural similarity /// 0008152 // metabolic process // inferred from electronic annotation	0005783 // endoplasmic reticulum // inferred from sequence or structural similarity /// 0005783 // endoplasmic reticulum // inferred from electronic annotation /// 0005794 // Golgi apparatus // inferred from electronic annotation /// 0005795 // Golgi stack // inferred from sequence or structural similarity /// 0009986 // cell surface // inferred from sequence or structural similarity /// 0009986 …	0003824 // catalytic activity // inferred from electronic annotation /// 0005509 // calcium ion binding // inferred from electronic annotation /// 0008449 // N-acetylglucosamine-6-sulfatase activity // inferred from sequence or structural similarity /// 0008484 // sulfuric ester hydrolase activity // inferred from electronic annotation /// 0016787 // hydrolase activity // inferred from electronic…	---	---	FBtr0083273 // span:7-24 // numtm:1 /// NP_524987.1 // span:7-24 // numtm:1 /// FBpp0082725 // span:7-24 // numtm:1	---	This probe set was annotated using the Matching Probes based pipeline to a Entrez Gene identifier using 1 transcripts. // false // Matching Probes // A	NM_080248(14)
1632649_at	pearson	0.336897	0.0392684	2.11686	0.218806	0.0414537	0.0498352	1.21662	0.828235	1.00094	1.00094	1632649_at	1632649_at	FBgn0032256	2008-11-29	Flybase	CG6187-RA	CG6187-RA /FEA=BDGP /GEN=CG6187 /DB_XREF=CG6187 FBgn0032256 /SEG=chr2L:+10469522,10475392 /MAP=31F1-31F1 /LEN=1980 /DEF=(CG6187 gene symbol:CG6187 FBgn0032256 (GO:0017173 DRAP deaminase))	CG6187-RA	---	---	April 2004 (BDGP v4.0)	chr2L:10477113-10482983 (+) // 100.0 //	RluA-2	RluA-2	---	full length	FBgn0032256	34440	Q9VKU8	EC:4.2.1.70 /// EC:5.4.99.12	---	NP_609411	NM_135567	FBgn0032256	---	---	---	---	---	0001522 // pseudouridine synthesis // inferred from electronic annotation	---	0003723 // RNA binding // inferred from electronic annotation /// 0004730 // pseudouridylate synthase activity // inferred from electronic annotation /// 0005515 // protein binding // inferred from physical interaction /// 0009982 // pseudouridine synthase activity // inferred from electronic annotation /// 0016829 // lyase activity // inferred from electronic annotation /// 0016853 // isomerase …	---	---	---	---	This probe set was annotated using the Matching Probes based pipeline to a Entrez Gene identifier using 2 transcripts. // false // Matching Probes // A	AY058686(14),NM_135567(14)
1624608_s_at	pearson	-0.336799	-0.103097	-2.11616	-0.577098	0.0415167	0.0499526	1.21493	0.568041	0.989295	0.989295	1624608_s_at	1624608_s_at	FBgn0000363	2008-11-29	Flybase	CT23539	CT23539 /FEA=sim4 /SEG=chr3R:+13838894,13839203	CT23539	---	---	April 2004 (BDGP v4.0)	chr3R:13838879-13839188 (+) // 100.0 //	couch potato	cpo	---	full length	FBgn0000363	45840	A4V319 /// Q01617 /// Q8MSK9	---	---	NP_001014631 /// NP_001014632 /// NP_524844 /// NP_732282 /// NP_732283 /// NP_732284	NM_001014631 /// NM_001014632 /// NM_080105 /// NM_169781 /// NM_169782 /// NM_169783	FBgn0000363	---	---	---	---	---	0007268 // synaptic transmission // inferred from mutant phenotype /// 0007422 // peripheral nervous system development // non-traceable author statement /// 0009987 // cellular process // inferred from mutant phenotype /// 0042048 // olfactory behavior // inferred from mutant phenotype	0005634 // nucleus // inferred from direct assay /// 0005634 // nucleus // non-traceable author statement /// 0005634 // nucleus // inferred from electronic annotation	0000166 // nucleotide binding // inferred from electronic annotation /// 0003676 // nucleic acid binding // inferred from electronic annotation /// 0003723 // RNA binding // inferred from electronic annotation /// 0003729 // mRNA binding // inferred from sequence or structural similarity /// 0005515 // protein binding // inferred from physical interaction	---	---	---	---	This probe set was annotated using the Matching Probes based pipeline to a Entrez Gene identifier using 4 transcripts. // false // Matching Probes // A	NM_080105(14),NM_169781(14),NM_169782(14),NM_169783(14)
1623985_at	pearson	0.3367	0.192188	2.11546	1.09038	0.0415804	0.0501009	1.21328	0.283948	0.959098	0.959098	1623985_at	1623985_at	FBgn0011335	2008-11-29	Flybase	CG6801-RA	CG6801-RA /FEA=BDGP /GEN=CG6801 /DB_XREF=CG6801 FBgn0036247 /SEG=chr3L:+12073682,12075603 /MAP=68F3-68F3 /LEN=1479 /DEF=(CG6801 gene symbol:CG6801 FBgn0036247 )	CG6801-RA	---	---	April 2004 (BDGP v4.0)	chr3L:12109235-12111156 (+) // 100.0 //	lethal (3) j2D3	l(3)j2D3	---	full length	FBgn0011335	39374	Q9VTT2	---	---	NP_648545	NM_140288	FBgn0011335	---	---	---	---	---	---	---	0005515 // protein binding // inferred from physical interaction /// 0042802 // identical protein binding // inferred from physical interaction	---	---	---	---	This probe set was annotated using the Matching Probes based pipeline to a Entrez Gene identifier using 2 transcripts. // false // Matching Probes // A	AY061293(14),NM_140288(14)
1630345_at	pearson	-0.33661	-0.150255	-2.11482	-0.846192	0.0416383	0.0502487	1.21147	0.403931	0.978897	0.978897	1630345_at	1630345_at	FBgn0052170	2008-11-29	Flybase	CG32170-RA	CG32170-RA /FEA=BDGP /GEN=CG32170 /DB_XREF=CG32170 FBgn0052170 /SEG=chr3L:+16826338,16827961 /MAP=73D4-73D4 /LEN=1623 /DEF=(CG32170 gene symbol:CG32170 FBgn0052170 )	CG32170-RA	---	---	April 2004 (BDGP v4.0)	chr3L:16870558-16872181 (+) // 100.0 //	CG32170 /// CG32170 /// CG32170	CG32170 /// DereCG32170 /// DwilCG32170	---	full length	FBgn0052170	317894	Q8I0S2 /// Q8I143 /// Q8I1H5	---	---	NP_730211	NM_168692	FBgn0052170 /// FBgn0064288 /// FBgn0064636	---	---	---	---	---	---	---	0016491 // oxidoreductase activity // inferred from electronic annotation /// 0046914 // transition metal ion binding // inferred from electronic annotation	---	---	---	---	This probe set was annotated using the Matching Probes based pipeline to a Entrez Gene identifier using 2 transcripts. // false // Matching Probes // A	BT001596(14),NM_168692(14)
1628107_at	pearson	0.336366	0.292171	2.1131	1.70096	0.0417954	0.050396	1.21255	0.098963	0.89208	0.89208	1628107_at	1628107_at	FBgn0031559	39781	Flybase	CG3513-RA	CG3513-RA /FEA=BDGP /GEN=CG3513 /DB_XREF=CG3513 FBgn0031559 /SEG=chr2L:-3685409,3685737 /MAP=24B1-24B1 /LEN=267 /DEF=(CG3513 gene symbol:CG3513 FBgn0031559 )	CG3513-RA	---	---	April 2004 (BDGP v4.0)	chr2L:3692840-3693168 (-) // 100.0 //	CG3513	CG3513	---	full length	FBgn0031559	33590	Q9VQT6	---	---	NP_608798	NM_134954	FBgn0031559	---	---	---	---	---	---	---	0004867 // serine-type endopeptidase inhibitor activity // inferred from sequence or structural similarity /// 0004867 // serine-type endopeptidase inhibitor activity // inferred from electronic annotation	---	---	GENSCAN00000000218 // span:4-23 // numtm:1	---	This probe set was annotated using the Matching Probes based pipeline to a Entrez Gene identifier using 2 transcripts. // false // Matching Probes // A	BT023687(14),NM_134954(14)
1626563_at	pearson	-0.336093	0.114523	-2.11116	0.641858	0.0419722	0.0505308	1.21419	0.525684	0.985023	0.985023	1626563_at	1626563_at	FBgn0010417	2008-11-29	Flybase	CG32211-RA	CG32211-RA /FEA=BDGP /GEN=Taf6 /DB_XREF=CG32211 FBgn0010417 /SEG=chr3L:+19549043,19551343 /MAP=76B9-76B9 /LEN=2061 /DEF=(CG32211 gene symbol:Taf6 synonyms:(CG9348) FBgn0010417 (GO:0006367 transcription initiation from Pol II promoter) (GO:0005669 transcription factor TFIID complex) (GO:0016251 general RNA polymerase II transcription factor) (GO:0005634 nucleus) (GO:0006355 regulation of transcrip…	CG32211-RA	---	---	April 2004 (BDGP v4.0)	chr3L:19592186-19594486 (+) // 100.0 //	Suppressor of Ras85D 3-4B	Taf6	chr3-	full length	FBgn0010417	40134	P49847	---	---	NP_524161	NM_079437	FBgn0010417	---	---	---	---	---	0006350 // transcription // inferred from electronic annotation /// 0006352 // transcription initiation // inferred from electronic annotation /// 0006355 // regulation of transcription, DNA-dependent // non-traceable author statement /// 0006355 // regulation of transcription, DNA-dependent // inferred from electronic annotation /// 0006367 // transcription initiation from RNA polymerase II prom…	0005634 // nucleus // non-traceable author statement /// 0005634 // nucleus // inferred from electronic annotation /// 0005669 // transcription factor TFIID complex // inferred from physical interaction /// 0005669 // transcription factor TFIID complex // inferred from sequence or structural similarity	0003677 // DNA binding // inferred from electronic annotation /// 0003702 // RNA polymerase II transcription factor activity // inferred from electronic annotation /// 0005515 // protein binding // inferred from physical interaction /// 0016251 // general RNA polymerase II transcription factor activity // inferred from sequence or structural similarity /// 0016986 // transcription initiation fact…	---	---	---	---	This probe set was annotated using the Matching Probes based pipeline to a Entrez Gene identifier using 2 transcripts. // false // Matching Probes // A	AY051702(14),NM_079437(14)
1629205_at	pearson	-0.335937	-0.0863184	-2.11005	-0.482401	0.0420737	0.0506772	1.21365	0.63291	0.99515	0.99515	1629205_at	1629205_at	FBgn0043806	2008-11-29	Flybase	CG32032-RA	CG32032-RA /FEA=BDGP /SEG=chr3L:+9051763,9053434	CG32032-RA	---	---	April 2004 (BDGP v4.0)	chr3L:9086153-9087824 (+) // 100.0 //	CG32032	CG32032	---	full length	FBgn0043806	192535	Q8IGE3 /// Q8IQB7	---	---	NP_729454	NM_168317	FBgn0043806	---	---	---	---	---	---	---	0005488 // binding // inferred from electronic annotation	---	---	FBtr0076529 // span:10-32,260-282 // numtm:2 /// NP_729454.1 // span:10-32,260-282 // numtm:2 /// AAN71578.1 // span:289-308 // numtm:1 /// GENSCAN00000017344 // span:7-29 // numtm:1 /// FBpp0076256 // span:10-32,260-282 // numtm:2	---	This probe set was annotated using the Matching Probes based pipeline to a Entrez Gene identifier using 1 transcripts. // false // Matching Probes // A	NM_168317(14)
1624213_at	pearson	-0.595604	-0.731345	-4.38658	-5.97055	0.000100659	0.0508128	0.0508128	1.33439e-06	0.00449068	0.00449068	1624213_at	1624213_at	FBgn0039764	2008-11-29	Flybase	CG15535-RA	CG15535-RA /FEA=BDGP /GEN=CG15535 /DB_XREF=CG15535 FBgn0039764 /SEG=chr3R:-26238117,26238920 /MAP=99F4-99F4 /LEN=733 /DEF=(CG15535 gene symbol:CG15535 FBgn0039764 )	CG15535-RA	---	---	April 2004 (BDGP v4.0)	chr3R:26248751-26249554 (-) // 100.0 //	CG15535	CG15535	---	full length	FBgn0039764	43608	Q4V6S1 /// Q9VA82	---	---	NP_651788	NM_143531	FBgn0039764	---	---	---	---	---	---	---	---	---	---	---	---	This probe set was annotated using the Matching Probes based pipeline to a Entrez Gene identifier using 1 transcripts. // false // Matching Probes // A	NM_143531(14)
1629097_at	pearson	-0.335599	-0.0611898	-2.10767	-0.34133	0.0422934	0.0508508	1.21651	0.735158	1.0007	1.0007	1629097_at	1629097_at	FBgn0001320	2008-11-29	Flybase	CG4717-RA	CG4717-RA /FEA=BDGP /GEN=kni /DB_XREF=CG4717 FBgn0001320 /SEG=chr3L:-20610867,20613901 /MAP=77E3-77E3 /LEN=2085 /DEF=(CG4717 gene symbol:kni FBgn0001320 (GO:0007354 zygotic determination of anteriorposterior axis, embryo) (GO:0007088 regulation of mitosis) (GO:0016481 negative regulation of transcription) (GO:0016566 specific transcriptional repressor) (GO:0004879 ligand-dependent nuclear recepto…	CG4717-RA	---	---	April 2004 (BDGP v4.0)	chr3L:20685429-20688463 (-) // 100.0 //	radius incompletus	kni	chr3-46.8	full length	FBgn0001320	40287	P10734	---	---	NP_524187	NM_079463	FBgn0001320	---	---	---	---	---	0000122 // negative regulation of transcription from RNA polymerase II promoter // traceable author statement /// 0006350 // transcription // inferred from electronic annotation /// 0006355 // regulation of transcription, DNA-dependent // inferred from electronic annotation /// 0007088 // regulation of mitosis // inferred from mutant phenotype /// 0007275 // multicellular organismal development /…	0005634 // nucleus // inferred from sequence or structural similarity /// 0005634 // nucleus // non-traceable author statement /// 0005634 // nucleus // inferred from electronic annotation	0003677 // DNA binding // inferred from electronic annotation /// 0003700 // transcription factor activity // inferred from sequence or structural similarity /// 0003700 // transcription factor activity // inferred from electronic annotation /// 0004872 // receptor activity // inferred from electronic annotation /// 0004879 // ligand-dependent nuclear receptor activity // inferred from sequence o…	---	---	---	---	This probe set was annotated using the Matching Probes based pipeline to a Entrez Gene identifier using 2 transcripts. // false // Matching Probes // A	AY118798(14),NM_079463(14)
1637404_at	pearson	0.335539	-0.0211783	2.10724	-0.117942	0.042333	0.0509591	1.21419	0.906874	0.995629	0.995629	1637404_at	1637404_at	FBgn0032813	39781	Flybase	CG10262-RA	CG10262-RA /FEA=BDGP /GEN=CG10262 /DB_XREF=CG10262 FBgn0032813 /SEG=chr2L:-19561108,19562010 /MAP=37F2-37F2 /LEN=768 /DEF=(CG10262 gene symbol:CG10262 FBgn0032813 (GO:0003677 DNA binding) (GO:0006260 DNA replication))	CG10262-RA	---	---	April 2004 (BDGP v4.0)	chr2L:19583025-19583927 (-) // 100.0 //	CG10262	CG10262	---	full length	FBgn0032813	35257	Q5BIF6 /// Q9VIT0	---	---	NP_609994	NM_136150	FBgn0032813	---	---	---	---	---	0006260 // DNA replication // inferred from sequence or structural similarity /// 0006260 // DNA replication // inferred from electronic annotation /// 0006275 // regulation of DNA replication // inferred from electronic annotation	0005634 // nucleus // inferred from electronic annotation /// 0043626 // PCNA complex // inferred from electronic annotation	0003677 // DNA binding // inferred from sequence or structural similarity /// 0003677 // DNA binding // inferred from electronic annotation /// 0030337 // DNA polymerase processivity factor activity // inferred from electronic annotation	---	---	---	---	This probe set was annotated using the Matching Probes based pipeline to a Entrez Gene identifier using 2 transcripts. // false // Matching Probes // A	AB195794(14),NM_136150(14)
1623349_x_at	pearson	-0.335496	-0.106912	-2.10694	-0.598693	0.0423609	0.0511146	1.21155	0.553727	0.987709	0.987709	1623349_x_at	1623349_x_at	---	2008-11-29	Flybase	AC005734	AC005734 /FEA=transposon /LEN=5150 /DESC=gb|AC005734|Rt1b RT1B 5150bp	Transposon.45	---	---	April 2004 (BDGP v4.0)	chr3LHet:1877419-1881467 (+) // 77.99 // /// chr2R:8389255-8391317 (+) // 39.84 // /// chr3L:13568009-13573162 (+) // 99.57 // /// chr3R:6783806-6788960 (+) // 99.57 // /// chr3R:23617419-23620486 (+) // 59.29 // /// chr3R:2242535-2244769 (+) // 43.07 // /// chr3R:9804514-9806607 (+) // 40.44 // /// chrU:662001-666694 (+) // 90.45 // /// chr3LHet:1041467-1451649 (-) // 96.33 // /// chr3LHet:95117…	---	---	---	---	---	---	---	---	---	---	---	---	---	---	---	---	---	---	---	---	---	---	---	---	This probe set was annotated using the Design Representative Id based pipeline to a Flybase identifier using 1 transcripts. // false // Design Representative Id // R	Transposon.45
1627396_a_at	pearson	-0.335448	-0.127014	-2.1066	-0.712957	0.0423921	0.0514041	1.20901	0.481205	0.986246	0.986246	1627396_a_at	1627396_a_at	FBgn0003559	2008-11-29	Flybase	CG17170-RC	CG17170-RC /FEA=BDGP /GEN=su(f) /DB_XREF=CG17170 FBgn0003559 /SEG=chrXh:-105603,115057 /LEN=1576 /DEF=(CG17170 gene symbol:su(f) FBgn0003559 (GO:0016070 RNA metabolism) (GO:0005847 mRNA cleavage and polyadenylation specificity factor complex) (GO:0005848 mRNA cleavage stimulating factor complex) (GO:0006379 mRNA cleavage) (GO:0005634 nucleus))	CG17170-RC	---	---	April 2004 (BDGP v4.0)	chrXHet:69194-77981 (+) // 100.0 //	lethal3Des	su(f)	chr1-65.9	full length	FBgn0003559	3354994	A8Y5B4 /// P25991 /// Q24539 /// Q8MZI2	---	---	NP_001015240 /// NP_001015241 /// NP_001015242 /// NP_001104479 /// NP_001104480	NM_001015240 /// NM_001015241 /// NM_001015242 /// NM_001111009 /// NM_001111010	FBgn0003559	---	---	---	---	---	0006379 // mRNA cleavage // inferred from sequence or structural similarity /// 0006396 // RNA processing // inferred from electronic annotation /// 0006397 // mRNA processing // inferred from electronic annotation /// 0016070 // RNA metabolic process // non-traceable author statement	0005622 // intracellular // inferred from electronic annotation /// 0005634 // nucleus // non-traceable author statement /// 0005634 // nucleus // inferred from electronic annotation /// 0005847 // mRNA cleavage and polyadenylation specificity factor complex // inferred from sequence or structural similarity /// 0005848 // mRNA cleavage stimulating factor complex // inferred from sequence or stru…	0005515 // protein binding // inferred from physical interaction	---	---	---	---	This probe set was annotated using the Matching Probes based pipeline to a Entrez Gene identifier using 3 transcripts. // false // Matching Probes // A	NM_001015240(14),NM_001015242(14),NM_001111009(10)
1626494_at	pearson	0.334354	-0.191836	2.09886	-1.08831	0.0431123	0.0514372	1.22264	0.284846	0.957645	0.957645	1626494_at	1626494_at	FBgn0037141	2008-11-29	Flybase	CG7143-RA	CG7143-RA /FEA=BDGP /SEG=chr3L:-21855900,21859060	CG7143-RA	---	---	April 2004 (BDGP v4.0)	chr3L:21931722-21934882 (-) // 100.0 //	DNApol-eta	DNApol-eta	---	full length	FBgn0037141	40438	Q9GNC0 /// Q9VNX1	EC:2.7.7.7	---	NP_649371	NM_141114	FBgn0037141	---	---	---	---	---	0006281 // DNA repair // inferred from electronic annotation /// 0019985 // bypass DNA synthesis // inferred from direct assay /// 0019985 // bypass DNA synthesis // inferred from sequence or structural similarity /// 0019985 // bypass DNA synthesis // non-traceable author statement	---	0003887 // DNA-directed DNA polymerase activity // inferred from direct assay /// 0003887 // DNA-directed DNA polymerase activity // inferred from mutant phenotype /// 0003887 // DNA-directed DNA polymerase activity // non-traceable author statement /// 0003887 // DNA-directed DNA polymerase activity // inferred from electronic annotation /// 0005515 // protein binding // inferred from physical i…	---	---	---	---	This probe set was annotated using the Matching Probes based pipeline to a Entrez Gene identifier using 1 transcripts. // false // Matching Probes // A	NM_141114(14)
1629474_at	pearson	-0.333621	-0.070537	-2.09368	-0.393714	0.0436003	0.0515142	1.22615	0.696487	0.998259	0.998259	1629474_at	1629474_at	FBgn0040923	2008-11-29	Flybase	CG11368-RA	CG11368-RA /FEA=BDGP /GEN=CG11368 /DB_XREF=CG11368 FBgn0040923 /SEG=chrX:+7192584,7193040 /MAP=7B2-7B2 /LEN=382 /DEF=(CG11368 gene symbol:CG11368 FBgn0040923 )	CG11368-RA	---	---	April 2004 (BDGP v4.0)	chrX:7346240-7346696 (+) // 100.0 //	CG11368	CG11368	---	full length	FBgn0040923	50397	Q9W3Q8	---	---	NP_652531	NM_144274	FBgn0040923	---	---	---	---	---	---	---	---	---	---	FBtr0071058 // span:7-24 // numtm:1 /// NP_652531.1 // span:7-24 // numtm:1 /// AAM29624.1 // span:7-24 // numtm:1 /// FBpp0071016 // span:7-24 // numtm:1	---	This probe set was annotated using the Matching Probes based pipeline to a Entrez Gene identifier using 2 transcripts. // false // Matching Probes // A	AY113619(11),NM_144274(14)
1636998_at	pearson	-0.33259	-0.324413	-2.0864	-1.90953	0.0442944	0.0515916	1.23195	0.0654864	0.830591	0.830591	1636998_at	1636998_at	FBgn0003326	2008-11-29	Flybase	CG17579-RB	CG17579-RB /FEA=BDGP /GEN=sca /DB_XREF=CG17579 FBgn0003326 /SEG=chr2R:+7845257,7866724 /MAP=49D3-49D3 /LEN=3793 /DEF=(CG17579 gene symbol:sca FBgn0003326 (GO:0008407 bristle morphogenesis) (GO:0007461 restriction of R8 fate) (GO:0005576 extracellular) (GO:0004871 signal transducer) (GO:0007456 eye morphogenesis (sensu Drosophila)) (GO:0005577 fibrinogen complex) (GO:0045468 regulation of R8 spaci…	CG17579-RB	---	---	April 2004 (BDGP v4.0)	chr2R:8668048-8689515 (+) // 100.0 //	scabrous	sca	chr2-66.7	full length	FBgn0003326	36411	P21520	---	---	NP_476710 /// NP_725230	NM_057362 /// NM_165951	FBgn0003326	---	---	---	---	---	0007165 // signal transduction // inferred from electronic annotation /// 0007219 // Notch signaling pathway // inferred from electronic annotation /// 0007275 // multicellular organismal development // inferred from electronic annotation /// 0007399 // nervous system development // inferred from genetic interaction /// 0007399 // nervous system development // non-traceable author statement /// 0…	0005576 // extracellular region // non-traceable author statement /// 0005577 // fibrinogen complex // inferred from sequence or structural similarity /// 0005768 // endosome // inferred from electronic annotation /// 0005770 // late endosome // inferred from electronic annotation	0004871 // signal transducer activity // traceable author statement /// 0005102 // receptor binding // inferred from electronic annotation /// 0005515 // protein binding // inferred from physical interaction	---	---	FBtr0087856 // span:20-42 // numtm:1 /// NP_725230.2 // span:20-42 // numtm:1 /// AAM76198.1 // span:20-42 // numtm:1 /// FBpp0086969 // span:20-42 // numtm:1	---	This probe set was annotated using the Matching Probes based pipeline to a Entrez Gene identifier using 2 transcripts. // false // Matching Probes // A	AY129456(14),NM_165951(14)
1637886_at	pearson	-0.332918	-0.43551	-2.08872	-2.69369	0.044073	0.0516016	1.22917	0.0113017	0.576274	0.576274	1637886_at	1637886_at	FBgn0034972	2008-11-29	Flybase	CG10339-RA	CG10339-RA /FEA=BDGP /GEN=CG10339 /DB_XREF=CG10339 FBgn0034972 /SEG=chr2R:-19121901,19124044 /MAP=60B8-60B9 /LEN=1812 /DEF=(CG10339 gene symbol:CG10339 FBgn0034972 (GO:0004091 carboxylesterase))	CG10339-RA	---	---	April 2004 (BDGP v4.0)	chr2R:19965856-19967999 (-) // 100.0 //	CG10339	CG10339	---	full length	FBgn0034972	37854	Q4V510 /// Q9W1B3	EC:3.1.1.1	---	NP_611881	NM_138037	FBgn0034972	---	---	---	---	---	0006810 // transport // inferred from electronic annotation	---	0004091 // carboxylesterase activity // inferred from sequence or structural similarity /// 0004091 // carboxylesterase activity // inferred from electronic annotation /// 0005215 // transporter activity // inferred from electronic annotation /// 0005515 // protein binding // inferred from physical interaction /// 0016787 // hydrolase activity // inferred from electronic annotation	---	---	FBtr0072288 // span:7-29 // numtm:1 /// NP_611881.1 // span:7-29 // numtm:1 /// GENSCAN00000014058 // span:7-29 // numtm:1 /// FBpp0072195 // span:7-29 // numtm:1	---	This probe set was annotated using the Matching Probes based pipeline to a Entrez Gene identifier using 1 transcripts. // false // Matching Probes // A	NM_138037(14)
1626570_s_at	pearson	-0.335435	-0.209952	-2.10651	-1.19561	0.0424006	0.0516502	1.20585	0.240914	0.957961	0.957961	1626570_s_at	1626570_s_at	FBgn0025803	2008-11-29	Flybase	CG17299-RA	CG17299-RA /FEA=BDGP /GEN=SNF4Agamma /DB_XREF=CG17299 FBgn0025803 /SEG=chr3R:+16966479,17038426 /MAP=93C1-93C6 /LEN=3612 /DEF=(CG17299 gene symbol:SNF4Agamma synonyms:(CG5806) FBgn0025803 (GO:0004674 protein serinethreonine kinase) (GO:0006468 protein amino acid phosphorylation) (GO:0004679 SNF1AAMP-activated protein kinase))	CG17299-RA	---	---	April 2004 (BDGP v4.0)	chr3R:16966462-17038409 (+) // 100.0 //	loechrig	SNF4Agamma	---	full length	FBgn0025803	42515	A1A6Y3 /// A1A703 /// O96613 /// Q0KI34 /// Q7JQX9 /// Q7KNS9 /// Q8I0A1 /// Q8I0B2 /// Q8I0K6 /// Q8IGX0 /// Q8SXT8 /// Q9VDD2	---	---	NP_001036736 /// NP_001036737 /// NP_001036738 /// NP_001036739 /// NP_001097854 /// NP_001097855 /// NP_536757 /// NP_732594 /// NP_732598 /// NP_732599 /// NP_732600 /// NP_732601	NM_001043271 /// NM_001043272 /// NM_001043273 /// NM_001043274 /// NM_001104384 /// NM_001104385 /// NM_080509 /// NM_169946 /// NM_169947 /// NM_169948 /// NM_169949 /// NM_169950	FBgn0025803	---	---	---	---	---	0006468 // protein amino acid phosphorylation // inferred from sequence or structural similarity /// 0042632 // cholesterol homeostasis // inferred from mutant phenotype	---	0004674 // protein serine/threonine kinase activity // non-traceable author statement /// 0004679 // AMP-activated protein kinase activity // inferred from sequence or structural similarity /// 0004679 // AMP-activated protein kinase activity // non-traceable author statement /// 0016301 // kinase activity // inferred from electronic annotation	---	---	---	---	This probe set was annotated using the Matching Probes based pipeline to a Entrez Gene identifier using 18 transcripts. // false // Matching Probes // A	AY070541(14),AY084138(14),AY166752(14),AY166754(14),AY166755(14),BT003626(14),NM_001043271(14),NM_001043272(14),NM_001043273(14),NM_001043274(14),NM_001104384(14),NM_001104385(14),NM_080509(14),NM_169946(14),NM_169947(14),NM_169948(14),NM_169949(14),NM_169950(14)
1627967_a_at	pearson	0.334334	0.162832	2.09872	0.918874	0.0431257	0.0516975	1.2196	0.365256	0.963582	0.963582	1627967_a_at	1627967_a_at	FBgn0034219	2008-11-29	Flybase	CG6536-RA	CG6536-RA /FEA=BDGP /GEN=CG6536 /DB_XREF=CG6536 FBgn0034219 /SEG=chr2R:-12509210,12510953 /MAP=54B15-54B15 /LEN=1443 /DEF=(CG6536 gene symbol:CG6536 FBgn0034219 (GO:0007186 G-protein coupled receptor protein signaling pathway) (GO:0016021 integral to membrane) (GO:0004930 G-protein coupled receptor))	CG6536-RA	---	---	April 2004 (BDGP v4.0)	chrUextra:13596162-13596889 (+) // 42.13 // /// chrUextra:13016046-13016713 (+) // 38.25 // /// chr2R:13332990-13334733 (-) // 100.0 //	mth-like 4	mthl4	---	full length	FBgn0034219	36960	A1ZAT1 /// B3LF69 /// Q1WWG4 /// Q9V817	---	---	NP_725675 /// NP_788394	NM_166227 /// NM_176214	FBgn0034219	---	---	---	---	---	0006950 // response to stress // inferred from sequence or structural similarity /// 0006950 // response to stress // inferred from electronic annotation /// 0007165 // signal transduction // inferred from electronic annotation /// 0007186 // G-protein coupled receptor protein signaling pathway // inferred from sequence or structural similarity /// 0007186 // G-protein coupled receptor protein si…	0005886 // plasma membrane // inferred from electronic annotation /// 0016020 // membrane // inferred from electronic annotation /// 0016021 // integral to membrane // inferred from sequence or structural similarity /// 0016021 // integral to membrane // non-traceable author statement /// 0016021 // integral to membrane // inferred from electronic annotation	0004871 // signal transducer activity // inferred from electronic annotation /// 0004872 // receptor activity // inferred from electronic annotation /// 0004930 // G-protein coupled receptor activity // inferred from sequence or structural similarity /// 0004930 // G-protein coupled receptor activity // inferred from electronic annotation	---	IPR000832 // GPCR, family 2, secretin-like // 1.2E-10 /// IPR000832 // GPCR, family 2, secretin-like // 7.6E-19	FBtr0086956 // span:210-232,244-263,273-295,317-336,366-388,418-440,455-477 // numtm:7 /// FBtr0086957 // span:210-232,244-263,273-295,317-336,366-388,418-440,455-474 // numtm:7 /// NP_788394.1 // span:210-232,244-263,273-295,317-336,366-388,418-440,455-474 // numtm:7 /// NP_725675.2 // span:210-232,244-263,273-295,317-336,366-388,418-440,455-477 // numtm:7 /// ABE01172.1 // span:38-60,90-112,127…	---	This probe set was annotated using the Matching Probes based pipeline to a Entrez Gene identifier using 2 transcripts. // false // Matching Probes // A	NM_166227(14),NM_176214(14)
1624817_at	pearson	0.333984	0.280602	2.09625	1.62772	0.0433579	0.051718	1.22274	0.113707	0.906069	0.906069	1624817_at	1624817_at	FBgn0031547	2008-11-29	Flybase	CG3212-RA	CG3212-RA /FEA=BDGP /GEN=CG3212 /DB_XREF=CG3212 FBgn0031547 /SEG=chr2L:-3515162,3516529 /MAP=23F6-23F6 /LEN=1221 /DEF=(CG3212 gene symbol:CG3212 FBgn0031547 (GO:0006952 defense response) (GO:0005887 integral to plasma membrane) (GO:0005044 scavenger receptor))	CG3212-RA	---	---	April 2004 (BDGP v4.0)	chr2L:3522593-3523960 (-) // 100.0 //	Scavenger receptor class C, type IV	Sr-CIV	---	full length	FBgn0031547	33576	Q5ELL3 /// Q5ELL5 /// Q5ELL6 /// Q5ELL7 /// Q5ELL8 /// Q5ELL9 /// Q5ELM0 /// Q5ELM3 /// Q5ELM4 /// Q5ELM5 /// Q5ELM6 /// Q5ELM7 /// Q5ELM8 /// Q5ELM9 /// Q9VQS2	---	---	NP_608789	NM_134945	FBgn0031547	---	---	---	---	---	0006952 // defense response // non-traceable author statement	0005887 // integral to plasma membrane // non-traceable author statement /// 0016020 // membrane // inferred from electronic annotation	0005044 // scavenger receptor activity // non-traceable author statement	---	---	---	---	This probe set was annotated using the Matching Probes based pipeline to a Entrez Gene identifier using 1 transcripts. // false // Matching Probes // A	NM_134945(14)
1639016_at	pearson	-0.332545	-0.0700357	-2.08609	-0.390902	0.044325	0.0518666	1.22941	0.698543	0.997383	0.997383	1639016_at	1639016_at	FBgn0030679	2008-11-29	Flybase	CG8206-RA	CG8206-RA /FEA=BDGP /GEN=CG8206 /DB_XREF=CG8206 FBgn0030679 /SEG=chrX:+15470259,15471256 /MAP=13E12-13E12 /LEN=997 /DEF=(CG8206 gene symbol:CG8206 FBgn0030679 )	CG8206-RA	---	---	April 2004 (BDGP v4.0)	chrX:15633278-15634275 (+) // 100.0 //	CG8206	CG8206	---	full length	FBgn0030679	32516	Q9VXQ7	---	---	NP_573064	NM_132836	FBgn0030679	---	---	---	---	---	---	---	0005515 // protein binding // inferred from physical interaction	---	---	---	---	This probe set was annotated using the Matching Probes based pipeline to a Entrez Gene identifier using 2 transcripts. // false // Matching Probes // A	AY122092(14),NM_132836(14)
1625008_at	pearson	-0.333516	-0.0244691	-2.09294	-0.136279	0.0436704	0.051919	1.22471	0.892482	0.994865	0.994865	1625008_at	1625008_at	FBgn0053330	2008-11-29	Flybase	CG33330-RA	CG33330-RA /FEA=BDGP /SEG=chr3R:+10620115,10620802	CG33330-RA	---	---	April 2004 (BDGP v4.0)	chr3R:10620097-10620784 (+) // 100.0 //	CG33330	CG33330	---	full length	FBgn0053330	2768667	Q7KSJ5	---	---	NP_996211	NM_206489	FBgn0053330	---	---	---	---	---	---	---	---	---	---	---	---	This probe set was annotated using the Matching Probes based pipeline to a Entrez Gene identifier using 1 transcripts. // false // Matching Probes // A	NM_206489(14)
1633959_s_at	pearson	0.333323	0.382351	2.09158	2.3039	0.0438	0.0520057	1.22494	0.0280956	0.688478	0.688478	1633959_s_at	1633959_s_at	FBgn0037229	2008-11-29	Flybase	U89994	U89994 /FEA=transposon /DB_XREF=DMU89994 /LEN=6411 /DESC=gb|U89994|Burdock DMU89994 6411bp Derived from U89994 (g1905850) (Rel. 51, Last updated, Version 1).	Transposon.10	---	---	April 2004 (BDGP v4.0)	chr2RHet:30696-37111 (+) // 99.73 // /// chr3LHet:742023-748179 (+) // 90.11 // /// chr2R:5038861-5045274 (+) // 99.78 // /// chr2R:3703231-3709643 (+) // 99.72 // /// chr3R:16092292-16098706 (+) // 99.75 // /// chr3R:1271737-1278140 (+) // 99.56 // /// chr3RHet:1175743-1182074 (-) // 98.46 // /// chr2L:21691881-21698294 (-) // 99.72 // /// chrX:11429128-11435541 (-) // 99.75 // /// chr3R:96511-1…	CG30345 /// CG9766 /// ---	CG30345 /// CG9766 /// DsimCG9766	---	full length	FBgn0037229	246553 /// 40539	A1Z7R4 /// Q1EC10 /// Q7JVU0	---	---	NP_001097672 /// NP_649448 /// NP_730799	NM_001104202 /// NM_141191 /// NM_164326	FBgn0037229 /// FBgn0050345 /// FBgn0086731	---	---	---	---	---	0006810 // transport // inferred from electronic annotation	0016020 // membrane // inferred from electronic annotation	0005215 // transporter activity // inferred from electronic annotation	---	---	ABG02168.1 // span:138-160,170-192,213-232,236-258,299-316,336-358,361-383,393-415,427-449,459-481 // numtm:10	---	This probe set was annotated using the Genome Consensus/Exemplar Overlap based pipeline to a Entrez Gene identifier using 1 transcripts. // false // Genome Consensus/Exemplar Overlap // C	NM_141191
1634341_a_at	pearson	0.332137	0.136464	2.08321	0.766974	0.044602	0.0520519	1.23033	0.448899	0.984807	0.984807	1634341_a_at	1634341_a_at	FBgn0039152	2008-11-29	Flybase	CG6129-RB	CG6129-RB /FEA=BDGP /GEN=CG6129 /DB_XREF=CG6129 FBgn0039152 /SEG=chr3R:+19936681,19944574 /MAP=95E1-95E3 /LEN=6639 /DEF=(CG6129 gene symbol:CG6129 FBgn0039152 )	CG6129-RB	---	---	April 2004 (BDGP v4.0)	chr3R:19946024-19953917 (+) // 100.0 //	CG6129	CG6129	---	full length	FBgn0039152	42860	Q8IMX3 /// Q8MSN3 /// Q9VCD1	---	---	NP_651216 /// NP_788730	NM_142959 /// NM_176553	FBgn0039152	---	---	---	---	---	0045449 // regulation of transcription // inferred from electronic annotation	0005634 // nucleus // inferred from electronic annotation /// 0035253 // ciliary rootlet // inferred from sequence or structural similarity	0000166 // nucleotide binding // inferred from electronic annotation /// 0030528 // transcription regulator activity // inferred from electronic annotation	---	---	---	---	This probe set was annotated using the Matching Probes based pipeline to a Entrez Gene identifier using 2 transcripts. // false // Matching Probes // A	NM_142959(14),NM_176553(14)
1632410_at	pearson	-0.331926	-0.0753153	-2.08172	-0.420532	0.0447461	0.0521539	1.23095	0.676998	0.999849	0.999849	1632410_at	1632410_at	FBgn0035372	2008-11-29	Flybase	CG12093-RA	CG12093-RA /FEA=BDGP /GEN=CG12093 /DB_XREF=CG12093 FBgn0035372 /SEG=chr3L:-2753188,2754630 /MAP=62F3-62F3 /LEN=1290 /DEF=(CG12093 gene symbol:CG12093 FBgn0035372 )	CG12093-RA	---	---	April 2004 (BDGP v4.0)	chr3L:2772559-2774001 (-) // 100.0 //	CG12093	CG12093	---	full length	FBgn0035372	38343	Q8MR28 /// Q9VZX8	---	---	NP_647747	NM_139490	FBgn0035372	---	---	---	---	---	---	---	---	---	---	---	---	This probe set was annotated using the Matching Probes based pipeline to a Entrez Gene identifier using 2 transcripts. // false // Matching Probes // A	BT011424(14),NM_139490(14)
1632521_at	pearson	-0.384586	-0.0902872	-2.46481	-0.504759	0.0187608	0.0521643	0.996887	0.617297	0.992868	0.992868	1632521_at	1632521_at	FBgn0029906	2008-11-29	Flybase	CG4542-RA	CG4542-RA /FEA=BDGP /GEN=CG4542 /DB_XREF=CG4542 FBgn0029906 /SEG=chrX:+6561402,6563219 /MAP=6D3-6D3 /LEN=1632 /DEF=(CG4542 gene symbol:CG4542 FBgn0029906 (GO:0004576 oligosaccharyl transferase) (GO:0042283 dolichyl pyrophosphate Glc1Man9GlcNAc2 alpha-1,3-glucosyltransferase) (GO:0006487 N-linked glycosylation) (GO:0005886 plasma membrane) (GO:0005783 endoplasmic reticulum))	CG4542-RA	---	---	April 2004 (BDGP v4.0)	chrX:6715059-6716876 (+) // 100.0 //	CG4542	CG4542	---	full length	FBgn0029906	31623	Q9W3V8	---	---	NP_572355	NM_132127	FBgn0029906	---	---	---	---	---	0006487 // protein amino acid N-linked glycosylation // inferred from sequence or structural similarity /// 0006490 // oligosaccharide-lipid intermediate assembly // inferred from sequence or structural similarity	0005783 // endoplasmic reticulum // inferred from electronic annotation /// 0005789 // endoplasmic reticulum membrane // inferred from sequence or structural similarity /// 0005789 // endoplasmic reticulum membrane // inferred from electronic annotation /// 0016020 // membrane // inferred from electronic annotation /// 0016021 // integral to membrane // inferred from electronic annotation	0016740 // transferase activity // inferred from electronic annotation /// 0016757 // transferase activity, transferring glycosyl groups // inferred from electronic annotation /// 0042283 // dolichyl pyrophosphate Glc1Man9GlcNAc2 alpha-1,3-glucosyltransferase activity // inferred from sequence or structural similarity	---	---	FBtr0070970 // span:4-23,94-112,127-144,151-173,188-205,210-232,298-320,332-351,356-370,377-394,398-420,432-454,469-491 // numtm:13 /// NP_572355.1 // span:4-23,94-112,127-144,151-173,188-205,210-232,298-320,332-351,356-370,377-394,398-420,432-454,469-491 // numtm:13 /// AAL39807.1 // span:4-23,94-112,127-144,151-173,188-205,210-232,298-320,332-351,356-370,377-394,398-420,432-454,469-491 // numtm…	---	This probe set was annotated using the Matching Probes based pipeline to a Entrez Gene identifier using 3 transcripts. // false // Matching Probes // A	AY069662(14),BT029072(14),NM_132127(14)
1632209_at	pearson	-0.332475	-0.369042	-2.08559	-2.21079	0.0443723	0.0522551	1.22735	0.0345587	0.719392	0.719392	1632209_at	1632209_at	FBgn0039703	2008-11-29	Flybase	CG7829-RA	CG7829-RA /FEA=BDGP /GEN=CG7829 /DB_XREF=CG7829 FBgn0039703 /SEG=chr3R:-25632003,25632852 /MAP=99C2-99C2 /LEN=798 /DEF=(CG7829 gene symbol:CG7829 FBgn0039703 (GO:0004295 trypsin))	CG7829-RA	---	---	April 2004 (BDGP v4.0)	chr3R:25642637-25643486 (-) // 100.0 //	CG7829	CG7829	---	full length	FBgn0039703	43522	Q8IMK3 /// Q9VAG3	EC:3.4.21.4	---	NP_651732 /// NP_733310	NM_143475 /// NM_170431	FBgn0039703	---	---	---	---	---	0006508 // proteolysis // inferred from electronic annotation /// 0006508 // proteolysis // non-traceable author statement	---	0003824 // catalytic activity // inferred from electronic annotation /// 0004252 // serine-type endopeptidase activity // inferred from electronic annotation /// 0016787 // hydrolase activity // inferred from electronic annotation	---	---	---	---	This probe set was annotated using the Matching Probes based pipeline to a Entrez Gene identifier using 2 transcripts. // false // Matching Probes // A	AY113573(14),NM_143475(14)
1629136_at	pearson	-0.331436	-0.204656	-2.07827	-1.16412	0.0450814	0.0524478	1.23345	0.253257	0.958712	0.958712	1629136_at	1629136_at	FBgn0039722	2008-11-29	Flybase	CG15520-RA	CG15520-RA /FEA=BDGP /GEN=capa /DB_XREF=CG15520 FBgn0039722 /SEG=chr3R:-25728072,25729416 /MAP=99C6-99C6 /LEN=683 /DEF=(CG15520 gene symbol:capa FBgn0039722 (GO:0008613 diuretic hormone) (GO:0005184 neuropeptide hormone) (GO:0007218 neuropeptide signaling pathway) (GO:0016084 myostimulatory hormone))	CG15520-RA	---	---	April 2004 (BDGP v4.0)	chr3R:25738706-25740050 (-) // 100.0 //	Drm-myotropin	capa	---	full length	FBgn0039722	43541	Q9NIP6	---	---	NP_524552	NM_079828	FBgn0039722	---	---	---	---	---	0006812 // cation transport // traceable author statement /// 0007218 // neuropeptide signaling pathway // inferred from electronic annotation /// 0007218 // neuropeptide signaling pathway // inferred from sequence or structural similarity /// 0007218 // neuropeptide signaling pathway // non-traceable author statement /// 0007218 // neuropeptide signaling pathway // traceable author statement ///…	0005576 // extracellular region // non-traceable author statement /// 0005576 // extracellular region // inferred from direct assay /// 0005576 // extracellular region // inferred from electronic annotation	0005102 // receptor binding // inferred from sequence or structural similarity /// 0005184 // neuropeptide hormone activity // inferred from electronic annotation /// 0005184 // neuropeptide hormone activity // inferred from sequence or structural similarity /// 0005184 // neuropeptide hormone activity // non-traceable author statement /// 0005184 // neuropeptide hormone activity // inferred from…	---	---	---	---	This probe set was annotated using the Matching Probes based pipeline to a Entrez Gene identifier using 3 transcripts. // false // Matching Probes // A	AF203878(14),AY069234(14),NM_079828(14)
1628226_at	pearson	0.330887	0.291833	2.07441	1.69881	0.0454599	0.0525611	1.24044	0.0993717	0.891784	0.891784	1628226_at	1628226_at	FBgn0035791	39781	Flybase	CG8539-RA	CG8539-RA /FEA=BDGP /GEN=CG8539 /DB_XREF=CG8539 FBgn0035791 /SEG=chr3L:-7456797,7458200 /MAP=66A2-66A2 /LEN=1320 /DEF=(CG8539 gene symbol:CG8539 FBgn0035791 (GO:0004181 metallocarboxypeptidase))	CG8539-RA	---	---	April 2004 (BDGP v4.0)	chr3L:7490368-7491771 (-) // 100.0 //	CG8539 /// CG8539	CG8539 /// DsimCG8539	---	full length	FBgn0035791	38842	Q8SZR4 /// Q9VS80	EC:3.4.17.1	---	NP_648130	NM_139873	FBgn0035791 /// FBgn0085058	---	---	---	---	---	0006508 // proteolysis // inferred from electronic annotation	---	0004180 // carboxypeptidase activity // inferred from electronic annotation /// 0004181 // metallocarboxypeptidase activity // inferred from sequence or structural similarity /// 0005515 // protein binding // inferred from physical interaction /// 0008270 // zinc ion binding // inferred from electronic annotation /// 0016787 // hydrolase activity // inferred from electronic annotation	---	---	---	---	This probe set was annotated using the Matching Probes based pipeline to a Entrez Gene identifier using 1 transcripts. // false // Matching Probes // A	NM_139873(14)
1625810_s_at	pearson	-0.33049	-0.13676	-2.07161	-0.76867	0.0457356	0.0526266	1.2446	0.447906	0.984984	0.984984	1625810_s_at	1625810_s_at	FBgn0035287	2008-11-29	Flybase	CG13937-RA	CG13937-RA /FEA=BDGP /GEN=CG13937 /DB_XREF=CG13937 FBgn0035287 /SEG=chr3L:-1857183,1863666 /MAP=62B7-62B9 /LEN=1524 /DEF=(CG13937 gene symbol:CG13937 FBgn0035287 (GO:0016232 HNK-1 sulfotransferase))	CG13937-RA	---	---	April 2004 (BDGP v4.0)	chr3L:1876554-1883037 (-) // 100.0 //	CG13937	CG13937	---	full length	FBgn0035287	38249	Q6NNF1 /// Q7YU73 /// Q8IRG5 /// Q9W070	---	---	NP_647673 /// NP_728688 /// NP_728689	NM_139416 /// NM_167923 /// NM_167924	FBgn0035287	---	---	---	---	---	---	---	0016232 // HNK-1 sulfotransferase activity // inferred from sequence or structural similarity	---	IPR005331 // Chondroitin 4-O-sulfotransferase // 6.1E-30	FBtr0072861 // span:16-38 // numtm:1 /// FBtr0072862 // span:16-38 // numtm:1 /// FBtr0072863 // span:16-38 // numtm:1 /// NP_647673.1 // span:16-38 // numtm:1 /// NP_728689.1 // span:16-38 // numtm:1 /// NP_728688.1 // span:16-38 // numtm:1 /// GENSCAN00000010096 // span:16-38 // numtm:1 /// FBpp0072742 // span:16-38 // numtm:1 /// FBpp0072740 // span:16-38 // numtm:1 /// FBpp0072741 // span:16-…	---	This probe set was annotated using the Matching Probes based pipeline to a Entrez Gene identifier using 3 transcripts. // false // Matching Probes // A	NM_139416(14),NM_167923(14),NM_167924(14)
1627833_at	pearson	-0.331924	-0.131069	-2.08171	-0.73611	0.0447474	0.0526293	1.22764	0.467198	0.985959	0.985959	1627833_at	1627833_at	FBgn0035636	2008-11-29	Flybase	CG10546-RA	CG10546-RA /FEA=BDGP /GEN=Cralbp /DB_XREF=CG10546 FBgn0035636 /SEG=chr3L:-5742788,5743763 /MAP=64E8-64E8 /LEN=975 /DEF=(CG10546 gene symbol:Cralbp FBgn0035636 (GO:0016918 retinal binding))	CG10546-RA	---	---	April 2004 (BDGP v4.0)	chr3L:5776580-5777555 (-) // 100.0 //	Cellular retinaldehyde binding protein	Cralbp	---	---	FBgn0035636	38651	Q9VRP8	---	---	NP_523939	NM_079215	FBgn0035636	---	---	---	---	---	0006810 // transport // inferred from electronic annotation	0005622 // intracellular // inferred from electronic annotation	0005215 // transporter activity // inferred from electronic annotation /// 0016918 // retinal binding // inferred from sequence or structural similarity	---	---	---	---	This probe set was annotated using the Matching Probes based pipeline to a Entrez Gene identifier using 1 transcripts. // false // Matching Probes // A	NM_079215(14)
1623775_at	pearson	0.330263	0.0334016	2.07001	0.186076	0.0458938	0.0527907	1.24555	0.853597	0.999643	0.999643	1623775_at	1623775_at	FBgn0051089	39781	Flybase	CG31089-RA	CG31089-RA /FEA=BDGP /GEN=CG31089 /DB_XREF=CG31089 FBgn0051089 /SEG=chr3R:+21717783,21719177 /MAP=96F7-96F7 /LEN=1266 /DEF=(CG31089 gene symbol:CG31089 synonyms:(CG5990) FBgn0051089 )	CG31089-RA	---	---	April 2004 (BDGP v4.0)	chr3R:21728418-21729812 (+) // 100.0 //	CG31089	CG31089	---	full length	FBgn0051089	43135	Q9VBK6	EC:3.1.1.3	---	NP_733128	NM_170249	FBgn0051089	---	---	---	---	---	0006629 // lipid metabolic process // inferred from electronic annotation	---	0004806 // triacylglycerol lipase activity // inferred from sequence or structural similarity /// 0004806 // triacylglycerol lipase activity // inferred from electronic annotation /// 0016787 // hydrolase activity // inferred from electronic annotation	---	---	FBtr0084942 // span:5-23 // numtm:1 /// NP_733128.1 // span:5-23 // numtm:1 /// GENSCAN00000009358 // span:5-23 // numtm:1 /// FBpp0084316 // span:5-23 // numtm:1	---	This probe set was annotated using the Matching Probes based pipeline to a Entrez Gene identifier using 1 transcripts. // false // Matching Probes // A	NM_170249(14)
1624074_at	pearson	-0.329965	-0.213635	-2.06791	-1.21758	0.0461019	0.0529697	1.24784	0.232571	0.958773	0.958773	1624074_at	1624074_at	FBgn0034468	2008-11-29	Flybase	CG11797-RA	CG11797-RA /FEA=BDGP /GEN=Obp56a /DB_XREF=CG11797 FBgn0034468 /SEG=chr2R:+14761442,14762231 /MAP=56E5-56E5 /LEN=550 /DEF=(CG11797 gene symbol:Obp56a FBgn0034468 )	CG11797-RA	---	---	April 2004 (BDGP v4.0)	chr2R:15585227-15586016 (+) // 100.0 //	Odorant-binding protein 56a	Obp56a	---	full length	FBgn0034468	37264	A9QH86 /// Q9V8Y2	---	---	NP_611442	NM_137598	FBgn0034468	---	---	---	---	---	0006810 // transport // inferred from electronic annotation /// 0007606 // sensory perception of chemical stimulus // inferred from sequence or structural similarity /// 0007608 // sensory perception of smell // inferred from expression pattern /// 0007608 // sensory perception of smell // inferred from electronic annotation /// 0019236 // response to pheromone // inferred from sequence or struct…	0005576 // extracellular region // inferred from sequence or structural similarity /// 0005576 // extracellular region // inferred from electronic annotation	0005515 // protein binding // inferred from physical interaction /// 0005549 // odorant binding // inferred from sequence or structural similarity /// 0005549 // odorant binding // non-traceable author statement /// 0005549 // odorant binding // inferred from electronic annotation	---	---	FBtr0086476 // span:5-24 // numtm:1 /// NP_611442.1 // span:5-24 // numtm:1 /// AAL49345.1 // span:5-24 // numtm:1 /// GENSCAN00000015824 // span:5-24 // numtm:1 /// FBpp0085672 // span:5-24 // numtm:1	---	This probe set was annotated using the Matching Probes based pipeline to a Entrez Gene identifier using 2 transcripts. // false // Matching Probes // A	AY071723(14),NM_137598(14)
1625565_at	pearson	-0.32994	-0.374867	-2.06774	-2.25134	0.0461188	0.0530556	1.24496	0.0315954	0.696479	0.696479	1625565_at	1625565_at	FBgn0039254	2008-11-29	Flybase	CG13645-RB	CG13645-RB /FEA=BDGP /GEN=CG13645 /DB_XREF=CG13645 FBgn0039254 /SEG=chr3R:+20761615,20763212 /MAP=96B11-96B11 /LEN=1236 /DEF=(CG13645 gene symbol:CG13645 FBgn0039254 )	CG13645-RB	---	---	April 2004 (BDGP v4.0)	chr3R:20770958-20772555 (+) // 100.0 //	Nicotinamide mononucleotide adenylytransferase	Nmnat	---	full length	FBgn0039254	42987	Q7KS06 /// Q8T405 /// Q9VC03	---	---	NP_651315 /// NP_733064	NM_143058 /// NM_170185	FBgn0039254	---	---	---	---	---	0009058 // biosynthetic process // inferred from electronic annotation /// 0009435 // NAD biosynthetic process // inferred from electronic annotation /// 0045494 // photoreceptor cell maintenance // inferred from mutant phenotype	---	0000309 // nicotinamide-nucleotide adenylyltransferase activity // inferred from direct assay /// 0005515 // protein binding // inferred from physical interaction /// 0016779 // nucleotidyltransferase activity // inferred from electronic annotation	---	---	---	---	This probe set was annotated using the Matching Probes based pipeline to a Entrez Gene identifier using 1 transcripts. // false // Matching Probes // A	NM_170185(14)
1634237_at	pearson	0.329831	0.102609	2.06697	0.574333	0.0461955	0.0532105	1.24371	0.569887	0.989267	0.989267	1634237_at	1634237_at	FBgn0001967	2008-11-29	Flybase	CG16880-RA	CG16880-RA /FEA=BDGP /GEN=l(2)34Fa /DB_XREF=CG16880 FBgn0001967 /SEG=chr2L:-14000885,14002453 /MAP=34F1-34F1 /LEN=1568 /DEF=(CG16880 gene symbol:l(2)34Fa FBgn0001967 )	CG16880-RA	---	---	April 2004 (BDGP v4.0)	chr2L:14018733-14020301 (-) // 100.0 //	lethal (2) 34Fa	nimC3	---	full length	FBgn0001967	48772	Q9VJU2	---	---	NP_524928	NM_080189	FBgn0001967	---	---	---	---	---	---	---	0005515 // protein binding // inferred from physical interaction	---	---	---	---	This probe set was annotated using the Matching Probes based pipeline to a Entrez Gene identifier using 1 transcripts. // false // Matching Probes // A	NM_080189(14)
1636287_at	pearson	0.329761	0.219672	2.06648	1.25371	0.0462448	0.053389	1.24172	0.219321	0.963982	0.963982	1636287_at	1636287_at	FBgn0035619	39781	Flybase	CG10592-RA	CG10592-RA /FEA=BDGP /GEN=CG10592 /DB_XREF=CG10592 FBgn0035619 /SEG=chr3L:-5552048,5554580 /MAP=64D5-64D5 /LEN=1749 /DEF=(CG10592 gene symbol:CG10592 FBgn0035619 (GO:0004035 alkaline phosphatase))	CG10592-RA	---	---	April 2004 (BDGP v4.0)	chr3L:5585840-5588372 (-) // 100.0 //	CG10592 /// CG10592 /// CG10592 /// CG10592 /// GA10422 /// CG10592 /// CG10592 /// CG10592	CG10592 /// DanaCG10592 /// DereCG10592 /// DperCG10592 /// DpseGA10422 /// DsecCG10592 /// DsimCG10592 /// DyakCG10592	chrXR-	full length	FBgn0035619	38632	Q9VRM8	EC:3.1.3.1	---	NP_647976	NM_139719	FBgn0035619 /// FBgn0070479 /// FBgn0086991 /// FBgn0086993 /// FBgn0086995 /// FBgn0086997 /// FBgn0086999 /// FBgn0087001	---	---	---	---	---	0008152 // metabolic process // inferred from electronic annotation	---	0003824 // catalytic activity // inferred from electronic annotation /// 0004035 // alkaline phosphatase activity // inferred from sequence or structural similarity /// 0004035 // alkaline phosphatase activity // inferred from electronic annotation /// 0016787 // hydrolase activity // inferred from electronic annotation /// 0016791 // phosphatase activity // inferred from electronic annotation	---	---	---	---	This probe set was annotated using the Matching Probes based pipeline to a Entrez Gene identifier using 2 transcripts. // false // Matching Probes // A	AY084142(14),NM_139719(14)
1625837_at	pearson	-0.329711	-0.0842186	-2.06613	-0.470581	0.0462792	0.0536312	1.23935	0.641234	0.996138	0.996138	1625837_at	1625837_at	FBgn0039031	2008-11-29	Flybase	CG17244-RA	CG17244-RA /FEA=BDGP /GEN=CG17244 /DB_XREF=CG17244 FBgn0039031 /SEG=chr3R:+18793648,18794269 /MAP=94D6-94D6 /LEN=621 /DEF=(CG17244 gene symbol:CG17244 FBgn0039031 )	CG17244-RA	---	---	April 2004 (BDGP v4.0)	chr3R:18802992-18803613 (+) // 100.0 //	CG17244	CG17244	---	full length	FBgn0039031	42709	Q058W4 /// Q9VCT2	---	---	NP_651105	NM_142848	FBgn0039031	---	---	---	---	---	---	---	0005515 // protein binding // inferred from physical interaction	---	---	FBtr0084340 // span:4-26 // numtm:1 /// NP_651105.1 // span:4-26 // numtm:1 /// GENSCAN00000012184 // span:4-26 // numtm:1 /// FBpp0083733 // span:4-26 // numtm:1	---	This probe set was annotated using the Matching Probes based pipeline to a Entrez Gene identifier using 1 transcripts. // false // Matching Probes // A	NM_142848(14)
1626430_at	pearson	0.329501	-0.012152	2.06465	-0.0676645	0.0464273	0.0537288	1.24003	0.946487	0.996012	0.996012	1626430_at	1626430_at	---	39781	Flybase	Stencil:3L:21695248:21694127:GENSCAN	Stencil:3L:21695248:21694127:GENSCAN /FEA=stencil /SEG=chr3L:-21694127,21695248	Dm.3L.33451.0	---	---	April 2004 (BDGP v4.0)	chr3L:21769949-21771070 (-) // 100.0 //	---	---	---	---	---	---	---	---	---	---	---	---	---	---	---	---	---	---	---	---	---	---	---	---	This probe set was annotated using the Design Representative Id based pipeline to a Flybase identifier using 1 transcripts. // false // Design Representative Id // R	Dm.3L.33451.0
1628547_at	pearson	-0.329306	-0.0713655	-2.06329	-0.398362	0.0465641	0.0538439	1.2404	0.693094	0.99864	0.99864	1628547_at	1628547_at	FBgn0038038	2008-11-29	Flybase	CG5167-RA	CG5167-RA /FEA=BDGP /GEN=CG5167 /DB_XREF=CG5167 FBgn0038038 /SEG=chr3R:+8232272,8233843 /MAP=87B9-87B9 /LEN=1571 /DEF=(CG5167 gene symbol:CG5167 FBgn0038038 )	CG5167-RA	---	---	April 2004 (BDGP v4.0)	chr3R:8232253-8233824 (+) // 100.0 //	CG5167	CG5167	---	full length	FBgn0038038	41521	Q9VG81	---	---	NP_650190	NM_141933	FBgn0038038	---	---	---	---	---	0008152 // metabolic process // inferred from electronic annotation	0005811 // lipid particle // inferred from direct assay	0003824 // catalytic activity // inferred from electronic annotation /// 0005488 // binding // inferred from electronic annotation	---	---	FBtr0082583 // span:274-296 // numtm:1 /// NP_650190.1 // span:274-296 // numtm:1 /// ABC86253.1 // span:274-296 // numtm:1 /// GENSCAN00000008507 // span:274-296 // numtm:1 /// FBpp0082055 // span:274-296 // numtm:1	---	This probe set was annotated using the Matching Probes based pipeline to a Entrez Gene identifier using 2 transcripts. // false // Matching Probes // A	BT024191(14),NM_141933(14)
1635280_at	pearson	-0.329163	0.061537	-2.06228	0.343274	0.0466655	0.0540416	1.23983	0.733709	0.999667	0.999667	1635280_at	1635280_at	FBgn0039349	2008-11-29	Flybase	CG4685-RA	CG4685-RA /FEA=BDGP /GEN=CG4685 /DB_XREF=CG4685 FBgn0039349 /SEG=chr3R:-21439891,21442008 /MAP=96E6-96E6 /LEN=1873 /DEF=(CG4685 gene symbol:CG4685 FBgn0039349 (GO:0004777 succinate-semialdehyde dehydrogenase))	CG4685-RA	---	---	April 2004 (BDGP v4.0)	chr3R:21450526-21452643 (-) // 100.0 //	CG4685	CG4685	---	full length	FBgn0039349	43092	Q9VBP6	EC:1.2.1.24	---	NP_001014665 /// NP_001014666 /// NP_001014667 /// NP_651408	NM_001014665 /// NM_001014666 /// NM_001014667 /// NM_143151	FBgn0039349	---	---	---	---	---	0008152 // metabolic process // inferred from electronic annotation /// 0009450 // gamma-aminobutyric acid catabolic process // inferred from sequence or structural similarity /// 0055114 // oxidation reduction // inferred from electronic annotation	0005739 // mitochondrion // inferred from sequence or structural similarity	0004777 // succinate-semialdehyde dehydrogenase activity // inferred from sequence or structural similarity /// 0004777 // succinate-semialdehyde dehydrogenase activity // inferred from electronic annotation /// 0016491 // oxidoreductase activity // inferred from electronic annotation	---	---	---	---	This probe set was annotated using the Matching Probes based pipeline to a Entrez Gene identifier using 5 transcripts. // false // Matching Probes // A	AY058434(14),NM_001014665(14),NM_001014666(14),NM_001014667(14),NM_143151(14)
1626694_at	pearson	-0.329117	0.0355667	-2.06196	0.198152	0.0466976	0.0542094	1.23743	0.84422	1.00003	1.00003	1626694_at	1626694_at	FBgn0039897	2008-11-29	Flybase	CG1674-RA	CG1674-RA /FEA=BDGP /GEN=CG1674 /DB_XREF=CG1674 FBgn0039897 /SEG=chr4:+251220,264317 /MAP=102B2-102B3 /LEN=2392 /DEF=(CG1674 gene symbol:CG1674 FBgn0039897 )	CG1674-RA	---	---	April 2004 (BDGP v4.0)	chr4:252108-265205 (+) // 100.0 //	CG1674	CG1674	---	full length	FBgn0039897	43780	Q1RKY9 /// Q8IGF3 /// Q8IMB8 /// Q8IMB9 /// Q8SXK8 /// Q9V4C1	---	---	NP_651913 /// NP_726553 /// NP_726554 /// NP_995588	NM_143656 /// NM_166746 /// NM_166747 /// NM_205866	FBgn0039897	---	---	---	---	---	---	---	0005515 // protein binding // inferred from physical interaction	---	---	---	---	This probe set was annotated using the Matching Probes based pipeline to a Entrez Gene identifier using 1 transcripts. // false // Matching Probes // A	NM_166747(14)
1636247_at	pearson	-0.328835	-0.309417	-2.05997	-1.81166	0.0468976	0.0543353	1.23947	0.0797368	0.859149	0.859149	1636247_at	1636247_at	FBgn0052354	2008-11-29	Flybase	CG32354-RA	CG32354-RA /FEA=BDGP /GEN=CG32354 /DB_XREF=CG32354 FBgn0052354 /SEG=chr3L:-8374562,8379990 /MAP=66C11-66C12 /LEN=2330 /DEF=(CG32354 gene symbol:CG32354 synonyms:(CG7159 CG7027) FBgn0052354 (GO:0004866 endopeptidase inhibitor) (GO:0017106 activin inhibitor))	CG32354-RA	---	---	April 2004 (BDGP v4.0)	chr3L:8408952-8414380 (-) // 100.0 //	CG32354	CG32354	---	full length	FBgn0052354	50302	Q9VSK1	---	---	NP_729380	NM_168275	FBgn0052354	---	---	---	---	---	---	0005576 // extracellular region // inferred from sequence or structural similarity	0004866 // endopeptidase inhibitor activity // inferred from sequence or structural similarity /// 0005515 // protein binding // inferred from physical interaction	---	---	FBtr0076662 // span:57-79 // numtm:1 /// NP_729380.1 // span:57-79 // numtm:1 /// AAL13554.1 // span:57-79 // numtm:1 /// GENSCAN00000003876 // span:57-79 // numtm:1 /// FBpp0076385 // span:57-79 // numtm:1	---	This probe set was annotated using the Matching Probes based pipeline to a Entrez Gene identifier using 2 transcripts. // false // Matching Probes // A	AY058325(14),NM_168275(14)
1632030_at	pearson	0.328568	0.148873	2.0581	0.838231	0.0470874	0.0544055	1.24124	0.408318	0.978026	0.978026	1632030_at	1632030_at	FBgn0051454	2008-11-29	Flybase	CG31454-RA	CG31454-RA /FEA=BDGP /GEN=CG31454 /DB_XREF=CG31454 FBgn0051454 /SEG=chr3R:+4347762,4349257 /MAP=85A2-85A2 /LEN=1368 /DEF=(CG31454 gene symbol:CG31454 synonyms:(CG11740) FBgn0051454 )	CG31454-RA	---	---	April 2004 (BDGP v4.0)	chr3R:4347747-4349242 (+) // 100.0 //	CG31454	CG31454	---	full length	FBgn0051454	318744	Q8INQ8	---	---	NP_731250	NM_169224	FBgn0051454	---	---	---	---	---	---	---	---	---	---	FBtr0081870 // span:34-56,71-93,98-120,155-174,290-309,329-351 // numtm:6 /// NP_731250.1 // span:34-56,71-93,98-120,155-174,290-309,329-351 // numtm:6 /// FBpp0081359 // span:34-56,71-93,98-120,155-174,290-309,329-351 // numtm:6	---	This probe set was annotated using the Matching Probes based pipeline to a Entrez Gene identifier using 1 transcripts. // false // Matching Probes // A	NM_169224(14)
1637432_at	pearson	-0.32855	-0.06814	-2.05798	-0.380271	0.0470999	0.0546324	1.23833	0.706337	0.997787	0.997787	1637432_at	1637432_at	FBgn0029804	2008-11-29	Flybase	CG3097-RA	CG3097-RA /FEA=BDGP /GEN=CG3097 /DB_XREF=CG3097 FBgn0029804 /SEG=chrX:-5506227,5511154 /MAP=5C2-5C2 /LEN=1984 /DEF=(CG3097 gene symbol:CG3097 FBgn0029804 (GO:0004182 carboxypeptidase A))	CG3097-RA	---	---	April 2004 (BDGP v4.0)	chrX:5659885-5664812 (-) // 100.0 //	CG3097	CG3097	---	full length	FBgn0029804	31503	Q9W478	EC:3.4.17.1	---	NP_572259	NM_132031	FBgn0029804	---	---	---	---	---	0006508 // proteolysis // inferred from electronic annotation	---	0004180 // carboxypeptidase activity // inferred from electronic annotation /// 0008270 // zinc ion binding // inferred from electronic annotation /// 0016787 // hydrolase activity // inferred from electronic annotation	---	---	---	---	This probe set was annotated using the Matching Probes based pipeline to a Entrez Gene identifier using 2 transcripts. // false // Matching Probes // A	AY113471(13),NM_132031(14)
1630301_at	pearson	-0.328545	-0.428944	-2.05794	-2.64384	0.0471035	0.0547372	1.23521	0.0127448	0.592956	0.592956	1630301_at	1630301_at	FBgn0031022	2008-11-29	Flybase	CG12204-RA	CG12204-RA /FEA=BDGP /GEN=CG12204 /DB_XREF=CG12204 FBgn0031022 /SEG=chrX:-19224233,19225361 /MAP=18C7-18C8 /LEN=1128 /DEF=(CG12204 gene symbol:CG12204 FBgn0031022 )	CG12204-RA	---	---	April 2004 (BDGP v4.0)	chrX:19387306-19388434 (-) // 100.0 //	CG12204	CG12204	---	full length	FBgn0031022	32937	Q95R57 /// Q9VWH9	---	---	NP_573386	NM_133158	FBgn0031022	---	---	---	---	---	---	---	---	---	---	---	---	This probe set was annotated using the Matching Probes based pipeline to a Entrez Gene identifier using 1 transcripts. // false // Matching Probes // A	NM_133158(14)
1636426_at	pearson	-0.328499	0.0667358	-2.05762	0.3724	0.0471362	0.054851	1.23287	0.712129	0.997594	0.997594	1636426_at	1636426_at	FBgn0025827	2008-11-29	Flybase	CG6421-RA	CG6421-RA /FEA=BDGP /SEG=chr2R:+11935974,11936633	CG6421-RA	---	---	April 2004 (BDGP v4.0)	chr2R:12759754-12760413 (+) // 100.0 //	CG6421	CG6421	---	full length	FBgn0025827	46813	A1ZAL1 /// B3DN95 /// O96826 /// Q8SY65	---	---	NP_652048	NM_143791	FBgn0025827	---	---	---	---	---	---	---	0005509 // calcium ion binding // inferred from electronic annotation	---	---	ACD99447.1 // span:21-38 // numtm:1	---	This probe set was annotated using the Matching Probes based pipeline to a Entrez Gene identifier using 1 transcripts. // false // Matching Probes // A	NM_143791(14)
1636215_at	pearson	0.328278	-0.189497	2.05607	-1.07455	0.0472938	0.055009	1.23379	0.290871	0.957494	0.957494	1636215_at	1636215_at	---	2008-11-29	Flybase	S.CX000659	S.CX000659 /FEA=fgenesh /SEG=chrX:-5939655,5940217	S.CX000659	---	---	April 2004 (BDGP v4.0)	chrX:6093312-6093874 (-) // 100.0 //	---	---	---	---	---	---	---	---	---	---	---	---	---	---	---	---	---	---	---	---	---	---	---	---	This probe set was annotated using the Matching Probes based pipeline to a ENSEMBL identifier using 1 transcripts. // false // Matching Probes // A	GENSCAN00000001343(14)
1635271_at	pearson	0.328198	0.53307	2.0555	3.50799	0.0473513	0.0551458	1.23211	0.00140268	0.240026	0.240026	1635271_at	1635271_at	FBgn0050431	2008-11-29	Flybase	CG30431-RA	CG30431-RA /FEA=BDGP /GEN=CG30431 /DB_XREF=CG30431 FBgn0050431 /SEG=chr2R:+1341207,1343668 /MAP=42A14-42A14 /LEN=1810 /DEF=(CG30431 gene symbol:CG30431 synonyms:(CG8324 CG8341) FBgn0050431 )	CG30431-RA	---	---	April 2004 (BDGP v4.0)	chr2R:2090247-2092708 (+) // 100.0 //	CG30431	CG30431	---	full length	FBgn0050431	35549	Q4V6Y7 /// Q7YTY9	---	---	NP_610211	NM_136367	FBgn0050431	---	---	---	---	---	---	0005622 // intracellular // inferred from electronic annotation /// 0005634 // nucleus // inferred from electronic annotation	0003676 // nucleic acid binding // inferred from sequence or structural similarity /// 0003676 // nucleic acid binding // inferred from electronic annotation /// 0008270 // zinc ion binding // inferred from electronic annotation	---	---	---	---	This probe set was annotated using the Matching Probes based pipeline to a Entrez Gene identifier using 1 transcripts. // false // Matching Probes // A	NM_136367(14)
1624692_at	pearson	-0.327608	-0.0918075	-2.05136	-0.513331	0.0477743	0.0553003	1.23992	0.611359	0.991532	0.991532	1624692_at	1624692_at	FBgn0037934	2008-11-29	Flybase	CG6830-RA	CG6830-RA /FEA=BDGP /GEN=CG6830 /DB_XREF=CG6830 FBgn0037934 /SEG=chr3R:-7506708,7510080 /MAP=86E19-86E19 /LEN=2782 /DEF=(CG6830 gene symbol:CG6830 FBgn0037934 )	CG6830-RA	---	---	April 2004 (BDGP v4.0)	chr3R:7506690-7510062 (-) // 100.0 //	CG6830	CG6830	---	full length	FBgn0037934	41408	Q9VGJ8	---	---	NP_650103	NM_141846	FBgn0037934	---	---	---	---	---	---	---	---	---	---	---	---	This probe set was annotated using the Matching Probes based pipeline to a Entrez Gene identifier using 2 transcripts. // false // Matching Probes // A	AY070944(14),NM_141846(14)
1634940_at	pearson	-0.32758	0.0116613	-2.05116	0.0649319	0.0477949	0.0554895	1.23727	0.948645	0.996932	0.996932	1634940_at	1634940_at	FBgn0020545	2008-11-29	Flybase	CG3943-RA	CG3943-RA /FEA=BDGP /GEN=kraken /DB_XREF=CG3943 FBgn0020545 /SEG=chr2L:+854431,856204 /MAP=21D4-21D4 /LEN=1321 /DEF=(CG3943 gene symbol:kraken FBgn0020545 (GO:0017171 serine hydrolase) (GO:0008372 cellular component unknown) (GO:0007586 digestion) (GO:0009636 response to toxin))	CG3943-RA	---	---	April 2004 (BDGP v4.0)	chr2L:852766-854539 (+) // 100.0 //	kraken	kraken	chr2-	full length	FBgn0020545	33265	O18391	---	---	NP_477265	NM_057917	FBgn0020545	---	---	---	---	---	0007275 // multicellular organismal development // inferred from electronic annotation /// 0007586 // digestion // inferred from expression pattern /// 0007586 // digestion // inferred from electronic annotation /// 0009636 // response to toxin // inferred from expression pattern /// 0009636 // response to toxin // inferred from electronic annotation	---	0003824 // catalytic activity // inferred from electronic annotation /// 0004091 // carboxylesterase activity // inferred from electronic annotation /// 0016787 // hydrolase activity // inferred from electronic annotation /// 0017171 // serine hydrolase activity // non-traceable author statement	---	---	---	---	This probe set was annotated using the Matching Probes based pipeline to a Entrez Gene identifier using 2 transcripts. // false // Matching Probes // A	AY095092(14),NM_057917(14)
1635642_at	pearson	-0.327556	-0.11844	-2.05099	-0.66412	0.0478121	0.0555863	1.23456	0.511524	0.988013	0.988013	1635642_at	1635642_at	FBgn0051082	2008-11-29	Flybase	CG31082-RA	CG31082-RA /FEA=BDGP /GEN=CG31082 /DB_XREF=CG31082 FBgn0051082 /SEG=chr3R:+22399446,22401888 /MAP=97C1-97C1 /LEN=2442 /DEF=(CG31082 gene symbol:CG31082 FBgn0051082 )	CG31082-RA	---	---	April 2004 (BDGP v4.0)	chr3R:22410081-22412523 (+) // 100.0 //	CG31082	CG31082	---	full length	FBgn0051082	318587	Q8IMR7	---	---	NP_733157	NM_170278	FBgn0051082	---	---	---	---	---	---	---	0005515 // protein binding // inferred from physical interaction	---	---	---	---	This probe set was annotated using the Matching Probes based pipeline to a Entrez Gene identifier using 1 transcripts. // false // Matching Probes // A	NM_170278(14)
1633771_s_at	pearson	-0.327477	0.219244	-2.05045	1.25114	0.0478685	0.0557095	1.23286	0.220244	0.963843	0.963843	1633771_s_at	1633771_s_at	FBgn0037391	2008-11-29	Flybase	CG2017-RA	CG2017-RA /FEA=BDGP /GEN=CG2017 /DB_XREF=CG2017 FBgn0037391 /SEG=chr3R:-1683795,1688130 /MAP=83C5-83C6 /LEN=2301 /DEF=(CG2017 gene symbol:CG2017 FBgn0037391 (GO:0005525 GTP binding))	CG2017-RA	---	---	April 2004 (BDGP v4.0)	chr3R:1683798-1688133 (-) // 100.0 //	GP-1 related	CG2017	---	full length	FBgn0037391	40733	Q86BS2 /// Q960F7	---	---	NP_649603 /// NP_731024 /// NP_731025 /// NP_731026	NM_141346 /// NM_169115 /// NM_169116 /// NM_169117	FBgn0037391	---	---	---	---	---	---	---	0000166 // nucleotide binding // inferred from electronic annotation /// 0003924 // GTPase activity // inferred from electronic annotation /// 0005515 // protein binding // inferred from physical interaction /// 0005525 // GTP binding // inferred from sequence or structural similarity /// 0005525 // GTP binding // inferred from electronic annotation	---	---	---	---	This probe set was annotated using the Matching Probes based pipeline to a Entrez Gene identifier using 5 transcripts. // false // Matching Probes // A	AY052084(14),NM_141346(14),NM_169115(14),NM_169116(14),NM_169117(14)
1627244_at	pearson	-0.327455	-0.672774	-2.05029	-5.06299	0.0478847	0.0559282	1.23014	1.79297e-05	0.0164562	0.0164562	1627244_at	1627244_at	FBgn0042180	2008-11-29	Flybase	CG18870-RA	CG18870-RA /FEA=BDGP /GEN=CG18870 /DB_XREF=CG18870 FBgn0042180 /SEG=chr2R:-16658313,16660418 /MAP=57F4-57F4 /LEN=1979 /DEF=(CG18870 gene symbol:CG18870 FBgn0042180 )	CG18870-RA	---	---	April 2004 (BDGP v4.0)	chr2R:17502267-17504372 (-) // 100.0 //	CG18870	CG18870	---	full length	FBgn0042180	59218	Q9I7V5	---	---	NP_652704	NM_144447	FBgn0042180	---	---	---	---	---	---	---	---	---	---	FBtr0071688 // span:240-262 // numtm:1 /// NP_652704.1 // span:240-262 // numtm:1 /// AAM49946.1 // span:240-262 // numtm:1 /// FBpp0071605 // span:240-262 // numtm:1	---	This probe set was annotated using the Matching Probes based pipeline to a Entrez Gene identifier using 2 transcripts. // false // Matching Probes // A	AY118577(14),NM_144447(14)
1630900_at	pearson	0.327401	0.24613	2.04991	1.41389	0.047924	0.0562867	1.22802	0.167359	0.938179	0.938179	1630900_at	1630900_at	FBgn0026787	2008-11-29	Flybase	CG12178-RA	CG12178-RA /FEA=BDGP /GEN=Nhe1 /DB_XREF=CG12178 FBgn0026787 /SEG=chr2L:-103961,106718 /MAP=21A5-21A5 /LEN=2531 /DEF=(CG12178 gene symbol:Nhe1 FBgn0026787 (GO:0015385 sodium:hydrogen antiporter))	CG12178-RA	---	---	April 2004 (BDGP v4.0)	chr2L:103961-106718 (-) // 100.0 //	Nhe1	Nhe1	---	full length	FBgn0026787	33167	Q8SZX8 /// Q9VPJ1 /// Q9XZH4	---	---	NP_608491	NM_134647	FBgn0026787	---	---	---	---	---	0006810 // transport // inferred from electronic annotation /// 0006811 // ion transport // inferred from electronic annotation /// 0006814 // sodium ion transport // inferred from electronic annotation /// 0006885 // regulation of pH // inferred from electronic annotation	0016021 // integral to membrane // inferred from electronic annotation	0005515 // protein binding // inferred from physical interaction /// 0015297 // antiporter activity // inferred from electronic annotation /// 0015299 // solute:hydrogen antiporter activity // inferred from electronic annotation /// 0015385 // sodium:hydrogen antiporter activity // inferred from sequence or structural similarity /// 0015385 // sodium:hydrogen antiporter activity // non-traceable …	---	---	FBtr0078161 // span:100-122,126-148,161-180,195-217,229-251,302-324,337-354,358-380,392-411,421-443,456-475,490-512 // numtm:12 /// NP_608491.2 // span:100-122,126-148,161-180,195-217,229-251,302-324,337-354,358-380,392-411,421-443,456-475,490-512 // numtm:12 /// AAD32689.1 // span:100-122,126-148,161-180,195-217,304-326,350-372,393-412,422-444,457-479,489-511 // numtm:10 /// AAL39869.1 // span:1…	---	This probe set was annotated using the Matching Probes based pipeline to a Entrez Gene identifier using 1 transcripts. // false // Matching Probes // A	NM_134647(14)
1628699_at	pearson	0.327307	0.473305	2.04925	2.99155	0.0479913	0.0566293	1.22663	0.00540317	0.43294	0.43294	1628699_at	1628699_at	FBgn0002563	2008-11-29	Flybase	CG4178-RA	CG4178-RA /FEA=BDGP /GEN=Lsp1beta /DB_XREF=CG4178 FBgn0002563 /SEG=chr2L:+900311,902985 /MAP=21D4-21E1 /LEN=2606 /DEF=(CG4178 gene symbol:Lsp1beta FBgn0002563 (GO:0005576 extracellular) (GO:0045735 nutrient reservoir) (GO:0005616 larval serum protein complex))	CG4178-RA	---	---	April 2004 (BDGP v4.0)	chr2L:898646-901316 (+) // 99.85 //	Larval serum protein 1 beta	Lsp1beta	chr2-1.9	full length	FBgn0002563	33274	P11996	---	---	NP_476624	NM_057276	FBgn0002563	---	---	---	---	---	0006810 // transport // inferred from electronic annotation	0005576 // extracellular region // non-traceable author statement /// 0005576 // extracellular region // inferred from electronic annotation /// 0005616 // larval serum protein complex // inferred from direct assay /// 0005811 // lipid particle // inferred from direct assay	0005344 // oxygen transporter activity // inferred from electronic annotation /// 0045735 // nutrient reservoir activity // non-traceable author statement /// 0045735 // nutrient reservoir activity // inferred from electronic annotation	---	---	---	---	This probe set was annotated using the Matching Probes based pipeline to a Entrez Gene identifier using 3 transcripts. // false // Matching Probes // A	AY069163(14),BT024223(14),NM_057276(14)
1630468_at	pearson	-0.327196	-0.206407	-2.04847	-1.17452	0.0480719	0.056924	1.22559	0.249131	0.956358	0.956358	1630468_at	1630468_at	FBgn0030156	2008-11-29	Flybase	CG15247-RA	CG15247-RA /FEA=BDGP /GEN=CG15247 /DB_XREF=CG15247 FBgn0030156 /SEG=chrX:-9614568,9615708 /MAP=9A3-9A3 /LEN=1068 /DEF=(CG15247 gene symbol:CG15247 FBgn0030156 )	CG15247-RA	---	---	April 2004 (BDGP v4.0)	chrX:9768706-9769846 (-) // 100.0 //	CG15247	CG15247	---	full length	FBgn0030156	31919	Q5BIJ8 /// Q9W311	---	---	NP_572584	NM_132356	FBgn0030156	---	---	---	---	---	---	---	---	---	---	---	---	This probe set was annotated using the Matching Probes based pipeline to a Entrez Gene identifier using 1 transcripts. // false // Matching Probes // A	NM_132356(14)
1625364_at	pearson	0.327142	-0.238452	2.04809	-1.36708	0.048111	0.0573401	1.2235	0.181433	0.938396	0.938396	1625364_at	1625364_at	FBgn0036504	2008-11-29	Flybase	CG7463-RA	CG7463-RA /FEA=BDGP /SEG=chr3L:+15469498,15470527	CG7463-RA	---	---	April 2004 (BDGP v4.0)	chr3L:15513719-15514748 (+) // 100.0 //	yellow-k	yellow-k	---	full length	FBgn0036504	39678	Q9VUP8	---	---	NP_648772	NM_140515	FBgn0036504	---	---	---	---	---	---	---	---	---	---	FBtr0075556 // span:5-24 // numtm:1 /// NP_648772.1 // span:5-24 // numtm:1 /// GENSCAN00000013472 // span:5-24 // numtm:1 /// FBpp0075310 // span:5-24 // numtm:1	---	This probe set was annotated using the Matching Probes based pipeline to a Entrez Gene identifier using 1 transcripts. // false // Matching Probes // A	NM_140515(14)
1628094_at	pearson	-0.326477	-0.404547	-2.04344	-2.46296	0.048594	0.057374	1.22651	0.0195351	0.657423	0.657423	1628094_at	1628094_at	FBgn0038029	2008-11-29	Flybase	CG17639-RA	CG17639-RA /FEA=BDGP /GEN=CG17639 /DB_XREF=CG17639 FBgn0038029 /SEG=chr3R:+8209101,8211367 /MAP=87B9-87B9 /LEN=1028 /DEF=(CG17639 gene symbol:CG17639 FBgn0038029 (GO:0004364 glutathione transferase))	CG17639-RA	---	---	April 2004 (BDGP v4.0)	chr3R:8209082-8211348 (+) // 100.0 //	CG17639	CG17639	---	full length	FBgn0038029	41512	Q8SXQ9	EC:2.5.1.18	---	NP_650183	NM_141926	FBgn0038029	---	---	---	---	---	---	---	0004364 // glutathione transferase activity // inferred from sequence or structural similarity /// 0004364 // glutathione transferase activity // inferred from electronic annotation /// 0016740 // transferase activity // inferred from electronic annotation	---	---	---	---	This probe set was annotated using the Matching Probes based pipeline to a Entrez Gene identifier using 2 transcripts. // false // Matching Probes // A	AY084188(14),NM_141926(14)
1631146_at	pearson	0.327089	-0.118156	2.04772	-0.662504	0.0481495	0.0575832	1.2214	0.512544	0.988471	0.988471	1631146_at	1631146_at	FBgn0086361	2008-11-29	Flybase	CG1906-RE	CG1906-RE /FEA=BDGP /GEN=CG1906 /DB_XREF=CG1906 FBgn0039672 /SEG=chr3R:+25406909,25432245 /MAP=99B4-99B5 /LEN=1692 /DEF=(CG1906 gene symbol:CG1906 FBgn0039672 (GO:0006470 protein amino acid dephosphorylation) (GO:0004722 protein serinethreonine phosphatase))	CG1906-RE	---	---	April 2004 (BDGP v4.0)	chr3R:25417543-25442879 (+) // 100.0 //	alphabet	alph	---	full length	FBgn0086361	43481	Q8IMK7 /// Q961C5 /// Q9VAK1	---	---	NP_651701 /// NP_733295 /// NP_733296 /// NP_733297 /// NP_733298	NM_143444 /// NM_170416 /// NM_170417 /// NM_170418 /// NM_170419	FBgn0086361	---	---	---	---	---	0001745 // compound eye morphogenesis // inferred from mutant phenotype /// 0006470 // protein amino acid dephosphorylation // inferred from electronic annotation /// 0006470 // protein amino acid dephosphorylation // non-traceable author statement /// 0006979 // response to oxidative stress // inferred from mutant phenotype /// 0007476 // imaginal disc-derived wing morphogenesis // inferred from…	0008287 // protein serine/threonine phosphatase complex // inferred from electronic annotation	0000287 // magnesium ion binding // inferred from electronic annotation /// 0003824 // catalytic activity // inferred from electronic annotation /// 0004721 // phosphoprotein phosphatase activity // inferred from electronic annotation /// 0004722 // protein serine/threonine phosphatase activity // inferred from sequence or structural similarity /// 0004722 // protein serine/threonine phosphatase …	---	---	---	---	This probe set was annotated using the Matching Probes based pipeline to a Entrez Gene identifier using 2 transcripts. // false // Matching Probes // A	AY051685(14),NM_143444(14)
1635364_at	pearson	0.327068	0.185663	2.04757	1.05202	0.0481647	0.0577588	1.21872	0.300922	0.953582	0.953582	1635364_at	1635364_at	FBgn0050343	2008-11-29	Flybase	CG30343-RA	CG30343-RA /FEA=BDGP /GEN=CG30343 /DB_XREF=CG30343 FBgn0050343 /SEG=chr2R:+4312759,4314011 /MAP=45C1-45C1 /LEN=1252 /DEF=(CG30343 gene symbol:CG30343 FBgn0050343 )	CG30343-RA	---	---	April 2004 (BDGP v4.0)	chr2R:5139517-5140769 (+) // 100.0 //	CG30343	CG30343	---	full length	FBgn0050343	246551	A1Z7S9 /// Q95SA1	---	---	NP_724774	NM_165668	FBgn0050343	---	---	---	---	---	---	---	---	---	---	FBtr0088594 // span:122-144 // numtm:1 /// NP_724774.1 // span:122-144 // numtm:1 /// AAL28442.1 // span:122-144 // numtm:1 /// FBpp0087675 // span:122-144 // numtm:1	---	This probe set was annotated using the Matching Probes based pipeline to a Entrez Gene identifier using 1 transcripts. // false // Matching Probes // A	NM_165668(14)
1634125_at	pearson	0.326401	-0.0192805	2.0429	-0.107369	0.0486495	0.0577842	1.22485	0.915188	0.995662	0.995662	1634125_at	1634125_at	FBgn0050440	39781	Flybase	CG30440-RA	CG30440-RA /FEA=BDGP /GEN=CG30440 /DB_XREF=CG30440 FBgn0050440 /SEG=chr2R:-607184,634707 /MAP=41F4-41F4 /LEN=3423 /DEF=(CG30440 gene symbol:CG30440 synonyms:(CG10412 CG10416 CG12183) FBgn0050440 (GO:0005085 guanyl-nucleotide exchange factor))	CG30440-RA	---	---	April 2004 (BDGP v4.0)	chr2R:1355818-1383341 (-) // 100.0 //	CG30440	CG30440	---	full length	FBgn0050440	35496	Q7K4E0	---	---	NP_610172	NM_136328	FBgn0050440	---	---	---	---	---	0007242 // intracellular signaling cascade // inferred from electronic annotation /// 0035023 // regulation of Rho protein signal transduction // inferred from electronic annotation	0005622 // intracellular // inferred from electronic annotation	0005085 // guanyl-nucleotide exchange factor activity // inferred from sequence or structural similarity /// 0005085 // guanyl-nucleotide exchange factor activity // inferred from electronic annotation /// 0005089 // Rho guanyl-nucleotide exchange factor activity // inferred from electronic annotation	---	---	---	---	This probe set was annotated using the Matching Probes based pipeline to a Entrez Gene identifier using 2 transcripts. // false // Matching Probes // A	AY051968(14),NM_136328(14)
1630256_at	pearson	0.326313	0.385013	2.04228	2.32272	0.0487144	0.0580731	1.22343	0.0269299	0.698932	0.698932	1630256_at	1630256_at	FBgn0040102	39781	Flybase	CG2958-RA	CG2958-RA /FEA=BDGP /SEG=chr2L:+4180691,4181854	CG2958-RA	---	---	April 2004 (BDGP v4.0)	chr2L:4188122-4189285 (+) // 100.0 //	Lectin24Db	lectin-24Db	---	full length	FBgn0040102	53550	Q9VQX3	---	---	NP_652641	NM_144384	FBgn0040102	---	---	---	---	---	---	---	0005488 // binding // inferred from electronic annotation /// 0005534 // galactose binding // inferred from sequence or structural similarity /// 0005537 // mannose binding // inferred from direct assay /// 0042806 // fucose binding // inferred from direct assay	---	---	---	---	This probe set was annotated using the Matching Probes based pipeline to a Entrez Gene identifier using 2 transcripts. // false // Matching Probes // A	AY061025(14),NM_144384(14)
1624429_at	pearson	0.326222	0.101401	2.04165	0.567499	0.0487809	0.058283	1.22206	0.574462	0.98871	0.98871	1624429_at	1624429_at	FBgn0035989	2008-11-29	Flybase	CG3967-RB	CG3967-RB /FEA=BDGP /GEN=CG3967 /DB_XREF=CG3967 FBgn0035989 /SEG=chr3L:-9372366,9384206 /MAP=67B3-67B4 /LEN=1850 /DEF=(CG3967 gene symbol:CG3967 FBgn0035989 )	CG3967-RB	---	---	April 2004 (BDGP v4.0)	chr3L:9407937-9419777 (-) // 100.0 //	CG3967	CG3967	---	full length	FBgn0035989	39086	Q9VSY4	---	---	NP_648309 /// NP_648310 /// NP_729487 /// NP_729488 /// NP_729489	NM_140052 /// NM_140053 /// NM_170630 /// NM_170631 /// NM_170632	FBgn0035989	---	---	---	---	---	---	---	---	---	---	---	---	This probe set was annotated using the Matching Probes based pipeline to a Entrez Gene identifier using 1 transcripts. // false // Matching Probes // A	NM_170632(14)
1637590_at	pearson	0.384078	0.536657	2.46099	3.54109	0.0189312	0.0584672	0.995465	0.00128332	0.235571	0.235571	1637590_at	1637590_at	FBgn0259229	39781	Flybase	CG5156-RA	CG5156-RA /FEA=BDGP /GEN=CG5156 /DB_XREF=CG5156 FBgn0031326 /SEG=chr2L:+1229642,1231137 /MAP=21F3-21F3 /LEN=1257 /DEF=(CG5156 gene symbol:CG5156 FLAGGED_PROBLEMATIC FBgn0031326 )	CG5156-RA	---	---	April 2004 (BDGP v4.0)	chr2L:1227976-1229471 (+) // 100.0 //	CG42329	CG42329	---	full length	FBgn0031326	---	Q9VPZ4	---	---	NP_608590	NM_134746	FBgn0259229	---	---	---	---	---	---	---	0005515 // protein binding // inferred from physical interaction /// 0016747 // transferase activity, transferring groups other than amino-acyl groups // inferred from electronic annotation	---	---	FBtr0077976 // span:25-47,68-90,129-151,158-180,200-222,235-257,270-292,313-335,350-372 // numtm:9 /// NP_608590.1 // span:25-47,68-90,129-151,158-180,200-222,235-257,270-292,313-335,350-372 // numtm:9 /// FBpp0077641 // span:25-47,68-90,129-151,158-180,200-222,235-257,270-292,313-335,350-372 // numtm:9	---	This probe set was annotated using the Matching Probes based pipeline to a Entrez Gene identifier using 1 transcripts. // false // Matching Probes // A	NM_134746(14)
1638282_at	pearson	-0.326178	0.023068	-2.04134	0.128471	0.0488126	0.0584941	1.21983	0.898606	0.994336	0.994336	1638282_at	1638282_at	FBgn0031002	2008-11-29	Flybase	CG14196-RA	CG14196-RA /FEA=BDGP /GEN=CG14196 /DB_XREF=CG14196 FBgn0031002 /SEG=chrX:-18967136,18969427 /MAP=18B4-18B4 /LEN=1803 /DEF=(CG14196 gene symbol:CG14196 FBgn0031002 (GO:0015355 monocarboxylate porter))	CG14196-RA	---	---	April 2004 (BDGP v4.0)	chrX:19130209-19132500 (-) // 100.0 //	CG14196	CG14196	---	full length	FBgn0031002	32915	Q9VWK0	---	---	NP_573367	NM_133139	FBgn0031002	---	---	---	---	---	---	---	0015355 // secondary active monocarboxylate transmembrane transporter activity // inferred from sequence or structural similarity	---	---	FBtr0074691 // span:111-133,137-159,172-194,199-218,409-431,477-494,501-523,536-558 // numtm:8 /// NP_573367.1 // span:111-133,137-159,172-194,199-218,409-431,477-494,501-523,536-558 // numtm:8 /// AAY55232.1 // span:111-133,137-159,172-194,199-218,409-431,477-494,501-523,536-558 // numtm:8 /// GENSCAN00000012513 // span:41-60,104-126,130-152,165-187,192-211,402-424,470-487,494-516,529-551 // num…	---	This probe set was annotated using the Matching Probes based pipeline to a Entrez Gene identifier using 2 transcripts. // false // Matching Probes // A	BT022816(14),NM_133139(14)
1629899_at	pearson	0.325974	0.509186	2.03991	3.29403	0.0489622	0.0586246	1.22055	0.00247546	0.312403	0.312403	1629899_at	1629899_at	FBgn0000250	39781	Flybase	CG5848-RC	CG5848-RC /FEA=BDGP /GEN=cact /DB_XREF=CG5848 FBgn0000250 /SEG=chr2L:-16292272,16303739 /MAP=35F9-35F11 /LEN=1882 /DEF=(CG5848 gene symbol:cact FBgn0000250 (GO:0005737 cytoplasm) (GO:0006952 defense response) (GO:0009950 dorsalventral axis specification) (GO:0042308 negative regulation of protein-nucleus import) (GO:0007292 oogenesis) (GO:0006960 antimicrobial humoral response (sensu Invertebrata…	CG5848-RC	---	---	April 2004 (BDGP v4.0)	chr2L:16314192-16325655 (-) // 99.79 //	cactus	cact	chr2-52	full length	FBgn0000250	34969	Q03017	---	---	NP_476942 /// NP_476943 /// NP_723960 /// NP_995721	NM_057594 /// NM_057595 /// NM_165152 /// NM_205999	FBgn0000250	---	---	---	---	---	0006911 // phagocytosis, engulfment // inferred from mutant phenotype /// 0006952 // defense response // non-traceable author statement /// 0006952 // defense response // traceable author statement /// 0006955 // immune response // traceable author statement /// 0006967 // positive regulation of antifungal peptide biosynthetic process // inferred from mutant phenotype /// 0007275 // multicellular…	0005737 // cytoplasm // inferred from direct assay /// 0005737 // cytoplasm // non-traceable author statement /// 0005737 // cytoplasm // traceable author statement /// 0005737 // cytoplasm // inferred from electronic annotation	0005515 // protein binding // inferred from physical interaction /// 0008134 // transcription factor binding // traceable author statement	---	---	---	---	This probe set was annotated using the Matching Probes based pipeline to a Entrez Gene identifier using 1 transcripts. // false // Matching Probes // A	NM_057595(14)
1636134_at	pearson	-0.325935	-0.317843	-2.03964	-1.86646	0.0489908	0.0587913	1.21825	0.0714615	0.844819	0.844819	1636134_at	1636134_at	FBgn0037324	2008-11-29	Flybase	CG10609-RA	CG10609-RA /FEA=BDGP /GEN=Or83b /DB_XREF=CG10609 FBgn0037324 /SEG=chr3R:-1233170,1235642 /MAP=83A2-83A2 /LEN=1461 /DEF=(CG10609 gene symbol:Or83b FBgn0037324 (GO:0016021 integral to membrane) (GO:0007608 olfaction) (GO:0004984 olfactory receptor))	CG10609-RA	---	---	April 2004 (BDGP v4.0)	chr3R:1233173-1235645 (-) // 100.0 //	Odorant receptor 83b	Or83b	---	full length	FBgn0037324	40650	A8JQT8 /// Q4V458 /// Q9VNB5	---	---	NP_001097687 /// NP_524235	NM_001104217 /// NM_079511	FBgn0037324	---	---	---	---	---	0007165 // signal transduction // inferred from electronic annotation /// 0007186 // G-protein coupled receptor protein signaling pathway // inferred from electronic annotation /// 0007608 // sensory perception of smell // inferred from electronic annotation /// 0007608 // sensory perception of smell // inferred from sequence or structural similarity /// 0007608 // sensory perception of smell // …	0005886 // plasma membrane // inferred from direct assay /// 0005886 // plasma membrane // inferred from electronic annotation /// 0016020 // membrane // inferred from electronic annotation /// 0016021 // integral to membrane // inferred from sequence or structural similarity /// 0016021 // integral to membrane // inferred from electronic annotation /// 0030425 // dendrite // inferred from direct…	0004871 // signal transducer activity // inferred from electronic annotation /// 0004872 // receptor activity // inferred from electronic annotation /// 0004930 // G-protein coupled receptor activity // inferred from electronic annotation /// 0004984 // olfactory receptor activity // inferred from direct assay /// 0004984 // olfactory receptor activity // inferred from sequence or structural simi…	---	---	FBtr0078794 // span:44-66,79-96,135-157,193-215,347-369,389-411,460-482 // numtm:7 /// NP_001097687.1 // span:44-66,79-96,135-157,193-215,347-369,389-411,460-482 // numtm:7 /// NP_524235.2 // span:44-66,79-96,135-157,193-215,347-369,389-411,460-482 // numtm:7 /// AAT71306.1 // span:44-66,79-96,135-157,193-215,347-369,389-411,460-482 // numtm:7 /// GENSCAN00000006066 // span:114-136,149-166,205-22…	---	This probe set was annotated using the Matching Probes based pipeline to a Entrez Gene identifier using 2 transcripts. // false // Matching Probes // A	NM_001104217(14),NM_079511(14)
1624704_at	pearson	-0.32579	-0.386208	-2.03862	-2.33119	0.0490978	0.0589547	1.21791	0.02642	0.691027	0.691027	1624704_at	1624704_at	FBgn0035040	2008-11-29	Flybase	CG4741-RA	CG4741-RA /FEA=BDGP /GEN=CG4741 /DB_XREF=CG4741 FBgn0035040 /SEG=chr2R:-19654401,19657924 /MAP=60D9-60D9 /LEN=831 /DEF=(CG4741 gene symbol:CG4741 FBgn0035040 )	CG4741-RA	---	---	April 2004 (BDGP v4.0)	chr2R:20498356-20501879 (-) // 100.0 //	CG4741	CG4741	---	full length	FBgn0035040	37939	Q9W134	---	---	NP_611948	NM_138104	FBgn0035040	---	---	---	---	---	---	---	---	---	---	FBtr0072337 // span:61-83 // numtm:1 /// NP_611948.1 // span:61-83 // numtm:1 /// AAM50940.1 // span:61-83 // numtm:1 /// FBpp0072244 // span:61-83 // numtm:1	---	This probe set was annotated using the Matching Probes based pipeline to a Entrez Gene identifier using 2 transcripts. // false // Matching Probes // A	AY119080(14),NM_138104(14)
1631164_a_at	pearson	-0.325685	-0.00627483	-2.03788	-0.0349375	0.0491753	0.05909	1.21685	0.972354	0.998665	0.998665	1631164_a_at	1631164_a_at	FBgn0033744	2008-11-29	Flybase	CG12370-RA	CG12370-RA /FEA=BDGP /GEN=CG12370 /DB_XREF=CG12370 FBgn0033744 /SEG=chr2R:+7549069,7550800 /MAP=49A9-49A9 /LEN=1167 /DEF=(CG12370 gene symbol:CG12370 FBgn0033744 (GO:0016021 integral to membrane) (GO:0007186 G-protein coupled receptor protein signaling pathway) (GO:0008188 neuropeptide receptor) (GO:0005184 neuropeptide hormone) (GO:0008036 diuretic hormone receptor) (GO:0001633 secretin-like rec…	CG12370-RA	---	---	April 2004 (BDGP v4.0)	chr2R:8371861-8373592 (+) // 100.0 //	CG12370	CG12370	---	full length	FBgn0033744	36368	A1A6U3 /// Q4V3E9	---	---	NP_610789 /// NP_725175	NM_136945 /// NM_165907	FBgn0033744	---	---	---	---	---	0007165 // signal transduction // inferred from electronic annotation /// 0007186 // G-protein coupled receptor protein signaling pathway // inferred from sequence or structural similarity /// 0007186 // G-protein coupled receptor protein signaling pathway // inferred from electronic annotation	0005622 // intracellular // inferred from electronic annotation /// 0005886 // plasma membrane // inferred from electronic annotation /// 0016020 // membrane // inferred from electronic annotation /// 0016021 // integral to membrane // inferred from sequence or structural similarity /// 0016021 // integral to membrane // inferred from electronic annotation	0001633 // secretin-like receptor activity // inferred from sequence or structural similarity /// 0004871 // signal transducer activity // inferred from electronic annotation /// 0004872 // receptor activity // inferred from electronic annotation /// 0004930 // G-protein coupled receptor activity // inferred from electronic annotation /// 0005184 // neuropeptide hormone activity // non-traceable …	---	---	FBtr0087936 // span:164-186,198-220,233-255,268-290,323-345,365-382,392-414 // numtm:7 /// NP_610789.3 // span:164-186,198-220,233-255,268-290,323-345,365-382,392-414 // numtm:7 /// NP_725175.3 // span:164-186,198-220,233-255,268-290,323-345,365-382,392-414 // numtm:7 /// AAY55823.1 // span:164-186,198-220,233-255,268-290,323-345,365-382,392-414 // numtm:7 /// GENSCAN00000004365 // span:261-283,3…	---	This probe set was annotated using the Matching Probes based pipeline to a Entrez Gene identifier using 3 transcripts. // false // Matching Probes // A	BT023407(14),NM_136945(14),NM_165907(14)
1634471_at	pearson	0.384987	0.218757	2.46783	1.24822	0.0186272	0.0591385	0.995029	0.221297	0.963438	0.963438	1634471_at	1634471_at	FBgn0053214	39781	Flybase	CG33214-RA	CG33214-RA /FEA=BDGP /GEN=CG33214 /DB_XREF=CG33214 FBgn0053214 /SEG=chr3L:-21414826,21424821 /MAP=78D4-78D4 /LEN=4395 /DEF=(CG33214 gene symbol:CG33214 synonyms:(CG7190 CG7193 CG7195) FBgn0053214 )	CG33214-RA	---	---	April 2004 (BDGP v4.0)	chr3L:21490648-21500643 (-) // 100.0 //	CG33214	CG33214	---	full length	FBgn0053214	40382	Q9VP27	---	---	NP_788563	NM_176385	FBgn0053214	---	---	---	---	---	---	0016020 // membrane // inferred from electronic annotation	0005515 // protein binding // inferred from physical interaction /// 0017134 // fibroblast growth factor binding // inferred from electronic annotation	---	---	FBtr0078388 // span:1071-1093 // numtm:1 /// NP_788563.1 // span:1071-1093 // numtm:1 /// AAQ23611.1 // span:1071-1093 // numtm:1 /// FBpp0078043 // span:1071-1093 // numtm:1	---	This probe set was annotated using the Matching Probes based pipeline to a Entrez Gene identifier using 2 transcripts. // false // Matching Probes // A	BT010293(14),NM_176385(14)
1624663_a_at	pearson	0.3256	0.105217	2.03729	0.589096	0.0492379	0.0592216	1.21542	0.560066	0.989573	0.989573	1624663_a_at	1624663_a_at	FBgn0033748	2008-11-29	Flybase	CG8821-RA	CG8821-RA /FEA=BDGP /GEN=vis /DB_XREF=CG8821 FBgn0033748 /SEG=chr2R:-7572603,7575519 /MAP=49A12-49A13 /LEN=2020 /DEF=(CG8821 gene symbol:vis FBgn0033748 (GO:0003714 transcription co-repressor) (GO:0005634 nucleus) (GO:0003700 transcription factor))	CG8821-RA	---	---	April 2004 (BDGP v4.0)	chrUextra:519142-520852 (+) // 46.93 // /// chr2R:8395395-8398311 (-) // 100.0 //	vismay	vis	chr2-65.5 +/- 3.3	full length	FBgn0033748	36372	A1Z913 /// Q7K380	---	---	NP_523714 /// NP_788337	NM_078990 /// NM_176157	FBgn0033748	---	---	---	---	---	0006355 // regulation of transcription, DNA-dependent // inferred from electronic annotation /// 0007283 // spermatogenesis // inferred from expression pattern /// 0007283 // spermatogenesis // inferred from mutant phenotype /// 0007283 // spermatogenesis // inferred from physical interaction /// 0045449 // regulation of transcription // inferred from electronic annotation	0005634 // nucleus // inferred from sequence or structural similarity /// 0005634 // nucleus // inferred from electronic annotation	0003677 // DNA binding // inferred from electronic annotation /// 0003700 // transcription factor activity // inferred from sequence or structural similarity /// 0003700 // transcription factor activity // inferred from electronic annotation /// 0003714 // transcription corepressor activity // inferred from sequence or structural similarity /// 0042826 // histone deacetylase binding // non-tracea…	---	IPR001356 // Homeobox // 0.0050	---	---	This probe set was annotated using the Matching Probes based pipeline to a Entrez Gene identifier using 3 transcripts. // false // Matching Probes // A	AY058750(14),NM_078990(14),NM_176157(14)
1623518_s_at	pearson	-0.325558	-0.100958	-2.037	-0.565	0.0492686	0.0593787	1.21321	0.57614	0.989237	0.989237	1623518_s_at	1623518_s_at	FBgn0037912	2008-11-29	Flybase	CG31305-RB	CG31305-RB /FEA=BDGP /GEN=CG31305 /DB_XREF=CG31305 FBgn0051305 /SEG=chr3R:-7385629,7392789 /MAP=86E13-86E14 /LEN=1664 /DEF=(CG31305 gene symbol:CG31305 FBgn0051305 )	CG31305-RB	---	---	April 2004 (BDGP v4.0)	chr3R:7385611-7392771 (-) // 100.0 //	CG6782	CG6782	---	full length	FBgn0037912 /// FBgn0037913	3772221	Q7KSQ0 /// Q8IGA2 /// Q8INK2 /// Q8INK3 /// Q95TC7 /// Q9VGM2	---	---	NP_001027175 /// NP_001027176 /// NP_001027177 /// NP_001027178 /// NP_001027179 /// NP_001027180 /// NP_001027181	NM_001032004 /// NM_001032005 /// NM_001032006 /// NM_001032007 /// NM_001032008 /// NM_001032009 /// NM_001032010	FBgn0037912	---	---	---	---	---	0006810 // transport // inferred from electronic annotation	0005739 // mitochondrion // inferred from electronic annotation /// 0005740 // mitochondrial envelope // inferred from sequence or structural similarity /// 0005743 // mitochondrial inner membrane // inferred from electronic annotation /// 0005811 // lipid particle // inferred from direct assay /// 0016020 // membrane // inferred from electronic annotation /// 0016021 // integral to membrane // i…	0005215 // transporter activity // inferred from electronic annotation /// 0005371 // tricarboxylate secondary active transmembrane transporter activity // inferred from sequence or structural similarity /// 0005488 // binding // inferred from electronic annotation /// 0005504 // fatty acid binding // inferred from sequence or structural similarity /// 0008289 // lipid binding // inferred from el…	---	---	---	---	This probe set was annotated using the Matching Probes based pipeline to a Entrez Gene identifier using 6 transcripts. // true // Matching Probes // A	FBtr0100323(14),FBtr0100461(14),FBtr0100462(14),FBtr0100464(14),FBtr0100465(14),NM_001032005(14),NM_001032004(14),NM_001032007(14),NM_001032006(14),NM_001032008(14),AY061503(14),GENSCAN00000008227(9),FBtr0100465(14),FBtr0100462(14),FBtr0100461(14),FBtr0100464(14),FBtr0100323(14)
1637660_at	pearson	0.323999	0.208788	2.0261	1.18868	0.0504302	0.0594655	1.22685	0.243592	0.959167	0.959167	1637660_at	1637660_at	FBgn0035620	2008-11-29	Flybase	CG5150-RA	CG5150-RA /FEA=BDGP /GEN=CG5150 /DB_XREF=CG5150 FBgn0035620 /SEG=chr3L:+5554853,5556660 /MAP=64D5-64D5 /LEN=1807 /DEF=(CG5150 gene symbol:CG5150 FBgn0035620 (GO:0004035 alkaline phosphatase))	CG5150-RA	---	---	April 2004 (BDGP v4.0)	chr3L:5588645-5590452 (+) // 100.0 //	CG5150	CG5150	---	full length	FBgn0035620	38633	Q9VRM9	EC:3.1.3.1	---	NP_647977	NM_139720	FBgn0035620	---	---	---	---	---	0008152 // metabolic process // inferred from electronic annotation	---	0003824 // catalytic activity // inferred from electronic annotation /// 0004035 // alkaline phosphatase activity // inferred from sequence or structural similarity /// 0004035 // alkaline phosphatase activity // inferred from electronic annotation /// 0016787 // hydrolase activity // inferred from electronic annotation /// 0016791 // phosphatase activity // inferred from electronic annotation	---	---	---	---	This probe set was annotated using the Matching Probes based pipeline to a Entrez Gene identifier using 2 transcripts. // false // Matching Probes // A	AY060626(14),NM_139720(14)
1630999_at	pearson	-0.325477	0.0142984	-2.03643	0.0796181	0.0493283	0.0595004	1.21172	0.937053	0.99626	0.99626	1630999_at	1630999_at	FBgn0036698	2008-11-29	Flybase	CG7724-RA	CG7724-RA /FEA=BDGP /GEN=CG7724 /DB_XREF=CG7724 FBgn0036698 /SEG=chr3L:+17004497,17007413 /MAP=73E5-73E5 /LEN=1413 /DEF=(CG7724 gene symbol:CG7724 FBgn0036698 (GO:0016614 oxidoreductase, acting on CH-OH group of donors))	CG7724-RA	---	---	April 2004 (BDGP v4.0)	chr3L:17048717-17051633 (+) // 100.0 //	CG7724	CG7724	---	full length	FBgn0036698	39918	Q9VVE3	EC:1.1.1.145 /// EC:5.3.3.1	---	NP_648957	NM_140700	FBgn0036698	---	---	---	---	---	0006694 // steroid biosynthetic process // inferred from electronic annotation /// 0008152 // metabolic process // inferred from electronic annotation /// 0055114 // oxidation reduction // inferred from electronic annotation	---	0003824 // catalytic activity // inferred from electronic annotation /// 0003854 // 3-beta-hydroxy-delta5-steroid dehydrogenase activity // inferred from electronic annotation /// 0004769 // steroid delta-isomerase activity // inferred from electronic annotation /// 0005488 // binding // inferred from electronic annotation /// 0005515 // protein binding // inferred from physical interaction /// 0…	---	---	FBtr0075284 // span:306-328 // numtm:1 /// NP_648957.1 // span:306-328 // numtm:1 /// AAL39342.1 // span:306-328 // numtm:1 /// GENSCAN00000010545 // span:306-328 // numtm:1 /// FBpp0075044 // span:306-328 // numtm:1	---	This probe set was annotated using the Matching Probes based pipeline to a Entrez Gene identifier using 2 transcripts. // false // Matching Probes // A	AY069197(14),NM_140700(14)
1623763_at	pearson	-0.325193	-0.0543941	-2.03445	-0.303302	0.0495383	0.0596611	1.21393	0.763686	1.00288	1.00288	1623763_at	1623763_at	FBgn0032023	2008-11-29	Flybase	CG14274-RA	CG14274-RA /FEA=BDGP /GEN=CG14274 /DB_XREF=CG14274 FBgn0032023 /SEG=chr2L:+8332432,8333396 /MAP=29A5-29B1 /LEN=411 /DEF=(CG14274 gene symbol:CG14274 FBgn0032023 )	CG14274-RA	---	---	April 2004 (BDGP v4.0)	chr2L:8340201-8341165 (+) // 100.0 //	CG14274	CG14274	---	full length	FBgn0032023	34145	Q9VLP0	---	---	NP_609212	NM_135368	FBgn0032023	---	---	---	---	---	---	---	0005515 // protein binding // inferred from physical interaction	---	---	---	---	This probe set was annotated using the Matching Probes based pipeline to a Entrez Gene identifier using 2 transcripts. // false // Matching Probes // A	BT022976(14),NM_135368(14)
1624861_at	pearson	0.322584	0.0920161	2.01622	0.514507	0.0515027	0.05976	1.23803	0.610547	0.991966	0.991966	1624861_at	1624861_at	FBgn0065035	2008-11-29	Flybase	AlkB-RA	AlkB-RA /FEA=BDGP /SEG=chrX:-15589147,15590501	AlkB-RA	---	---	April 2004 (BDGP v4.0)	chrX:15752166-15753520 (-) // 100.0 //	AlkB	AlkB	---	full length	FBgn0065035	2768870	Q7KUZ2	---	---	NP_996458	NM_206735	FBgn0065035	---	---	---	---	---	0055114 // oxidation reduction // inferred from electronic annotation	---	0005506 // iron ion binding // inferred from electronic annotation /// 0016491 // oxidoreductase activity // inferred from electronic annotation	---	---	---	---	This probe set was annotated using the Matching Probes based pipeline to a Entrez Gene identifier using 2 transcripts. // false // Matching Probes // A	BT030983(14),NM_206735(14)
1638199_s_at	pearson	-0.325127	-0.145301	-2.03398	-0.817678	0.0495875	0.0597988	1.21219	0.419782	0.979005	0.979005	1638199_s_at	1638199_s_at	FBgn0026375	2008-11-29	Flybase	CG32555-RB	CG32555-RB /FEA=BDGP /GEN=RhoGAPp190 /DB_XREF=CG32555 FBgn0026375 /SEG=chrX:-17370101,17383511 /MAP=16B10-16B10 /LEN=7225 /DEF=(CG32555 gene symbol:RhoGAPp190 synonyms:(CG8240 CG8267) FBgn0026375 (GO:0005100 Rho GTPase activator) (GO:0016319 mushroom body development))	CG32555-RB	---	---	April 2004 (BDGP v4.0)	chrX:17533179-17546585 (-) // 99.94 //	Rp190RhoGAP	RhoGAPp190	---	full length	FBgn0026375	32743	Q8MRC6 /// Q8SX62 /// Q8T3N5 /// Q95T65 /// Q95VZ5 /// Q9VX32	---	---	NP_573231 /// NP_728089 /// NP_728090	NM_133003 /// NM_167572 /// NM_167573	FBgn0026375	---	---	---	---	---	0007165 // signal transduction // inferred from electronic annotation /// 0016319 // mushroom body development // inferred from mutant phenotype /// 0050770 // regulation of axonogenesis // inferred from genetic interaction	0005622 // intracellular // inferred from electronic annotation	0005100 // Rho GTPase activator activity // inferred from sequence or structural similarity /// 0005100 // Rho GTPase activator activity // non-traceable author statement	---	---	---	---	This probe set was annotated using the Matching Probes based pipeline to a Entrez Gene identifier using 3 transcripts. // false // Matching Probes // A	NM_133003(14),NM_167572(14),NM_167573(14)
1623226_at	pearson	0.322506	-0.275195	2.01568	-1.59376	0.0515624	0.0598981	1.23652	0.121136	0.911319	0.911319	1623226_at	1623226_at	FBgn0036361	2008-11-29	Flybase	CG10154-RA	CG10154-RA /FEA=BDGP /GEN=CG10154 /DB_XREF=CG10154 FBgn0036361 /SEG=chr3L:-13393390,13394701 /MAP=70B1-70B1 /LEN=1019 /DEF=(CG10154 gene symbol:CG10154 FBgn0036361 (GO:0016490 structural constituent of peritrophic membrane (sensu Insecta)))	CG10154-RA	---	---	April 2004 (BDGP v4.0)	chr3L:13428922-13430233 (-) // 100.0 //	CG10154	CG10154	---	full length	FBgn0036361	39509	Q8SX42 /// Q9VU72	---	---	NP_648646	NM_140389	FBgn0036361	---	---	---	---	---	0006030 // chitin metabolic process // inferred from electronic annotation /// 0007155 // cell adhesion // inferred from electronic annotation	0005576 // extracellular region // inferred from electronic annotation	0005515 // protein binding // inferred from physical interaction /// 0005540 // hyaluronic acid binding // inferred from electronic annotation /// 0008061 // chitin binding // inferred from electronic annotation /// 0016490 // structural constituent of peritrophic membrane // inferred from sequence or structural similarity	---	---	---	---	This probe set was annotated using the Matching Probes based pipeline to a Entrez Gene identifier using 1 transcripts. // false // Matching Probes // A	NM_140389(14)
1635468_a_at	pearson	0.32394	0.549027	2.02569	3.65738	0.0504741	0.0599232	1.22497	0.000937143	0.19309	0.19309	1635468_a_at	1635468_a_at	FBgn0036689	2008-11-29	Flybase	CG7730-RB	CG7730-RB /FEA=BDGP /GEN=CG7730 /DB_XREF=CG7730 FBgn0036689 /SEG=chr3L:+16976400,16978698 /MAP=73E4-73E4 /LEN=2125 /DEF=(CG7730 gene symbol:CG7730 FBgn0036689 )	CG7730-RB	---	---	April 2004 (BDGP v4.0)	chr3L:17020620-17022918 (+) // 100.0 //	CG7730	CG7730	---	full length	FBgn0036689	39908	Q9VVD3	---	---	NP_788521	NM_176343	FBgn0036689	---	---	---	---	---	---	---	---	---	---	---	---	This probe set was annotated using the Matching Probes based pipeline to a Entrez Gene identifier using 2 transcripts. // false // Matching Probes // A	AY061387(14),NM_176343(14)
1640827_at	pearson	-0.322296	-0.0618198	-2.01421	-0.344858	0.0517235	0.0600368	1.23744	0.73253	0.999814	0.999814	1640827_at	1640827_at	FBgn0031579	2008-11-29	Flybase	CG15422-RA	CG15422-RA /FEA=BDGP /GEN=CG15422 /DB_XREF=CG15422 FBgn0031579 /SEG=chr2L:+3997624,3997939 /MAP=24D3-24D3 /LEN=315 /DEF=(CG15422 gene symbol:CG15422 FBgn0031579 )	CG15422-RA	---	---	April 2004 (BDGP v4.0)	chr2L:4005055-4005370 (+) // 100.0 //	CG15422	CG15422	---	full length	FBgn0031579	33615	Q9VQW4	---	---	NP_608814	NM_134970	FBgn0031579	---	---	---	---	---	0009405 // pathogenesis // inferred from electronic annotation	0005576 // extracellular region // inferred from electronic annotation	0005515 // protein binding // inferred from physical interaction	---	---	---	---	This probe set was annotated using the Matching Probes based pipeline to a Entrez Gene identifier using 1 transcripts. // false // Matching Probes // A	NM_134970(14)
1636487_at	pearson	0.325106	0.303161	2.03384	1.77129	0.049603	0.060119	1.20964	0.0863452	0.865681	0.865681	1636487_at	1636487_at	FBgn0038849	2008-11-29	Flybase	CG7079-RA	CG7079-RA /FEA=BDGP /GEN=CG7079 /DB_XREF=CG7079 FBgn0038849 /SEG=chr3R:-16873566,16874465 /MAP=93B7-93B7 /LEN=768 /DEF=(CG7079 gene symbol:CG7079 FBgn0038849 )	CG7079-RA	---	---	April 2004 (BDGP v4.0)	chr3R:16873549-16874448 (-) // 100.0 //	CG7079	CG7079	---	full length	FBgn0038849	42488	Q9VDF7	---	---	NP_650936	NM_142679	FBgn0038849	---	---	---	---	---	---	---	---	---	---	GENSCAN00000008806 // span:113-135,155-177,187-206,213-235,259-281,302-324,372-394,458-480,490-509,521-543 // numtm:10	---	This probe set was annotated using the Matching Probes based pipeline to a Entrez Gene identifier using 2 transcripts. // false // Matching Probes // A	BT023318(14),NM_142679(14)
1628678_at	pearson	-0.321691	-0.0242392	-2.00999	-0.134998	0.0521893	0.06019	1.2427	0.893486	0.994558	0.994558	1628678_at	1628678_at	FBgn0025712	2008-11-29	Flybase	CG13920-RA	CG13920-RA /FEA=BDGP /SEG=chr3L:+1629571,1632127	CG13920-RA	---	---	April 2004 (BDGP v4.0)	chr3L:1648942-1651498 (+) // 100.0 //	CG13920	CG13920	---	full length	FBgn0025712	38203	Q8T0T9	---	---	NP_647639	NM_139382	FBgn0025712	---	---	---	---	---	---	---	---	---	---	FBtr0072761 // span:7-29,66-88,95-112,122-136 // numtm:4 /// NP_647639.1 // span:7-29,66-88,95-112,122-136 // numtm:4 /// FBpp0072644 // span:7-29,66-88,95-112,122-136 // numtm:4	---	This probe set was annotated using the Matching Probes based pipeline to a Entrez Gene identifier using 1 transcripts. // false // Matching Probes // A	NM_139382(14)
1635940_at	pearson	-0.322162	-0.179683	-2.01327	-1.01699	0.0518265	0.060191	1.23698	0.317032	0.958309	0.958309	1635940_at	1635940_at	FBgn0032228	2008-11-29	Flybase	CG5367-RA	CG5367-RA /FEA=BDGP /GEN=CG5367 /DB_XREF=CG5367 FBgn0032228 /SEG=chr2L:-10347218,10348685 /MAP=31D10-31D10 /LEN=1017 /DEF=(CG5367 gene symbol:CG5367 FBgn0032228 (GO:0004217 cathepsin L))	CG5367-RA	---	---	April 2004 (BDGP v4.0)	chr2L:10354809-10356276 (-) // 100.0 //	CG5367	CG5367	chr2-	full length	FBgn0032228	34401	Q4V6Q0 /// Q9VKY4	EC:3.4.22.15	---	NP_609387	NM_135543	FBgn0032228	---	---	---	---	---	0006508 // proteolysis // inferred from electronic annotation	---	0008234 // cysteine-type peptidase activity // inferred from electronic annotation /// 0016787 // hydrolase activity // inferred from electronic annotation	---	---	---	---	This probe set was annotated using the Matching Probes based pipeline to a Entrez Gene identifier using 1 transcripts. // false // Matching Probes // A	NM_135543(14)
1641348_at	pearson	0.32386	-0.0417673	2.02512	-0.232753	0.0505348	0.0602218	1.2235	0.817483	1.00076	1.00076	1641348_at	1641348_at	FBgn0085586	39781	Flybase	CG40214-RA	CG40214-RA /FEA=BDGP /GEN=CG40214 /DB_XREF=CG40214 FBgn0058214 /SEG=chrU:+1680998,1686968 /LEN=1689 /DEF=(CG40214 gene symbol:CG40214 FBgn0058214 )	CG40214-RA	---	---	April 2004 (BDGP v4.0)	chr2RHet:564495-570465 (+) // 100.0 //	CG40214	CG41265	---	full length	FBgn0085586	5740691	A8Y4X2 /// A8Y4X3 /// Q1RKX3 /// Q4V4R3 /// Q4V6D0	---	---	NP_001104356 /// NP_001104357	NM_001110886 /// NM_001110887	FBgn0085586	---	---	---	---	---	---	---	---	---	---	---	---	This probe set was annotated using the Matching Probes based pipeline to a Entrez Gene identifier using 2 transcripts. // false // Matching Probes // A	NM_001110886(14),NM_001110887(14)
1633399_at	pearson	-0.321246	-0.0240833	-2.00689	-0.134129	0.0525345	0.0603537	1.24797	0.894168	0.994329	0.994329	1633399_at	1633399_at	FBgn0020129	2008-11-29	Flybase	CG12240-RA	CG12240-RA /FEA=BDGP /SEG=chr2R:-19201882,19202864	CG12240-RA	---	---	April 2004 (BDGP v4.0)	chr2R:20045837-20046819 (-) // 100.0 //	DnaJ-like-60	DnaJ-60	---	full length	FBgn0020129	37869	P92029 /// Q8SZR5 /// Q9W1A1	---	---	NP_523840 /// NP_611892	NM_079116 /// NM_138048	FBgn0020129	---	---	---	---	---	0006457 // protein folding // inferred from sequence or structural similarity /// 0007275 // multicellular organismal development // inferred from electronic annotation /// 0007283 // spermatogenesis // non-traceable author statement /// 0007283 // spermatogenesis // inferred from electronic annotation /// 0030154 // cell differentiation // inferred from electronic annotation	0016020 // membrane // inferred from electronic annotation /// 0016021 // integral to membrane // inferred from electronic annotation	0031072 // heat shock protein binding // inferred from electronic annotation /// 0031177 // phosphopantetheine binding // inferred from electronic annotation /// 0051082 // unfolded protein binding // inferred from sequence or structural similarity	---	---	FBtr0072278 // span:139-161 // numtm:1 /// NP_523840.1 // span:139-161 // numtm:1 /// FBpp0072185 // span:139-161 // numtm:1	---	This probe set was annotated using the Matching Probes based pipeline to a Entrez Gene identifier using 1 transcripts. // false // Matching Probes // A	NM_079116(14)
1628460_at	pearson	0.323824	-0.00746839	2.02487	-0.0415834	0.0505618	0.0604753	1.22123	0.967097	0.998652	0.998652	1628460_at	1628460_at	FBgn0033720	2008-11-29	Flybase	CG13160-RA	CG13160-RA /FEA=BDGP /GEN=CG13160 /DB_XREF=CG13160 FBgn0033720 /SEG=chr2R:+7436308,7439805 /MAP=49A1-49A1 /LEN=2742 /DEF=(CG13160 gene symbol:CG13160 FBgn0033720 )	CG13160-RA	---	---	April 2004 (BDGP v4.0)	chr2R:8259100-8262592 (+) // 99.82 //	CG13160	CG13160	---	full length	FBgn0033720	36343	A1Z8Y0 /// Q8MRB3	---	---	NP_725145	NM_165890	FBgn0033720	---	---	---	---	---	0005975 // carbohydrate metabolic process // inferred from electronic annotation /// 0006508 // proteolysis // inferred from electronic annotation	---	0004553 // hydrolase activity, hydrolyzing O-glycosyl compounds // inferred from electronic annotation /// 0008233 // peptidase activity // inferred from electronic annotation	---	---	FBtr0087911 // span:32-54,381-403,416-438,458-480,493-515,520-539,546-568,590-612,619-641 // numtm:9 /// NP_725145.2 // span:32-54,381-403,416-438,458-480,493-515,520-539,546-568,590-612,619-641 // numtm:9 /// AAM52010.1 // span:54-76,403-425,438-460,480-502,515-537,542-561,568-590,612-634,641-663 // numtm:9 /// GENSCAN00000004375 // span:21-43,53-75,82-104,119-141,153-175,180-202,455-477,704-726…	---	This probe set was annotated using the Matching Probes based pipeline to a Entrez Gene identifier using 1 transcripts. // false // Matching Probes // A	NM_165890(14)
1638733_at	pearson	0.320942	0.446706	2.00478	2.77993	0.0527706	0.0604942	1.25064	0.00915909	0.531437	0.531437	1638733_at	1638733_at	FBgn0038291	2008-11-29	Flybase	CG3984-RA	CG3984-RA /FEA=BDGP /GEN=CG3984 /DB_XREF=CG3984 FBgn0038291 /SEG=chr3R:+10962901,10964644 /MAP=88E2-88E2 /LEN=1614 /DEF=(CG3984 gene symbol:CG3984 FBgn0038291 )	CG3984-RA	---	---	April 2004 (BDGP v4.0)	chr3R:10962883-10964626 (+) // 100.0 //	CG3984	CG3984	---	full length	FBgn0038291	41821	Q9VFD0	---	---	NP_650420	NM_142163	FBgn0038291	---	---	---	---	---	---	---	---	---	---	FBtr0083025 // span:13-32 // numtm:1 /// NP_650420.1 // span:13-32 // numtm:1 /// FBpp0082484 // span:13-32 // numtm:1	---	This probe set was annotated using the Matching Probes based pipeline to a Entrez Gene identifier using 1 transcripts. // false // Matching Probes // A	NM_142163(14)
1626461_at	pearson	-0.323587	-0.0918676	-2.02322	-0.513669	0.0507404	0.0605454	1.22261	0.611125	0.99147	0.99147	1626461_at	1626461_at	FBgn0011244	2008-11-29	Flybase	CG4357-RA	CG4357-RA /FEA=BDGP /GEN=CG4357 /DB_XREF=CG4357 FBgn0036279 /SEG=chr3L:-12326192,12348962 /MAP=69B3-69B3 /LEN=3907 /DEF=(CG4357 gene symbol:CG4357 FBgn0036279 (GO:0015378 sodium:chloride symporter))	CG4357-RA	---	---	April 2004 (BDGP v4.0)	chr3L:12361745-12384515 (-) // 100.0 //	Heat shock protein 60 related /// sodium chloride cotransporter 69	Hsp60B /// Ncc69	---	full length	FBgn0036279	39410 /// 48572	Q9VPS5 /// Q9VTW8	EC:3.6.1.3	---	NP_524925 /// NP_648572 /// NP_996066	NM_080186 /// NM_140315 /// NM_206344	FBgn0011244 /// FBgn0036279	---	---	---	---	---	0006457 // protein folding // inferred from sequence or structural similarity /// 0006457 // protein folding // inferred from electronic annotation /// 0006458 // 'de novo' protein folding // inferred from sequence or structural similarity /// 0006626 // protein targeting to mitochondrion // inferred from sequence or structural similarity /// 0006810 // transport // inferred from electronic annot…	0005739 // mitochondrion // inferred from sequence or structural similarity /// 0005739 // mitochondrion // inferred from electronic annotation /// 0005759 // mitochondrial matrix // inferred from sequence or structural similarity /// 0005759 // mitochondrial matrix // inferred from electronic annotation /// 0016020 // membrane // inferred from electronic annotation /// 0016021 // integral to mem…	0000166 // nucleotide binding // inferred from electronic annotation /// 0005215 // transporter activity // inferred from electronic annotation /// 0005515 // protein binding // inferred from electronic annotation /// 0005515 // protein binding // inferred from physical interaction /// 0005524 // ATP binding // inferred from electronic annotation /// 0015171 // amino acid transmembrane transporte…	---	---	FBtr0075987 // span:217-239,249-271,292-314,334-356,363-385,422-444,456-478,521-543,574-591,595-617,637-659 // numtm:11 /// FBtr0075988 // span:217-239,249-271,292-314,334-356,363-385,422-444,456-478,521-543,574-591,595-617,637-659 // numtm:11 /// NP_648572.1 // span:217-239,249-271,292-314,334-356,363-385,422-444,456-478,521-543,574-591,595-617,637-659 // numtm:11 /// NP_996066.1 // span:217-239…	---	This probe set was annotated using the Matching Probes based pipeline to a Entrez Gene identifier using 3 transcripts. // true // Matching Probes // A	FBtr0075987(14),FBtr0075988(14),NM_140315(14),NM_206344(14),BT001426(14),GENSCAN00000012310(14),FBtr0075987(14),FBtr0075988(14)
1636545_at	pearson	-0.320919	-0.125674	-2.00461	-0.705315	0.0527886	0.0606319	1.24814	0.485881	0.986616	0.986616	1636545_at	1636545_at	FBgn0032888	2008-11-29	Flybase	CG14405-RA	CG14405-RA /FEA=BDGP /GEN=CG14405 /DB_XREF=CG14405 FBgn0032888 /SEG=chr2L:-20789892,20790609 /MAP=38F1-38F1 /LEN=501 /DEF=(CG14405 gene symbol:CG14405 FBgn0032888 )	CG14405-RA	---	---	April 2004 (BDGP v4.0)	chr2L:20820150-20820867 (-) // 100.0 //	CheB38c	CheB38c	---	full length	FBgn0032888	35346	Q4V4J4 /// Q4V4S0 /// Q9VIJ1	---	---	NP_610061	NM_136217	FBgn0032888	---	---	---	---	---	---	---	---	---	---	---	---	This probe set was annotated using the Matching Probes based pipeline to a Entrez Gene identifier using 1 transcripts. // false // Matching Probes // A	NM_136217(14)
1630208_at	pearson	-0.320818	-0.193826	-2.00391	-1.10004	0.0528673	0.0607707	1.24708	0.279786	0.958181	0.958181	1630208_at	1630208_at	FBgn0041588	2008-11-29	Flybase	CG31426-RA	CG31426-RA /FEA=BDGP /GEN=ligatin /DB_XREF=CG31426 FBgn0041588 /SEG=chr3R:-24964974,24966878 /MAP=98F13-98F13 /LEN=1846 /DEF=(CG31426 gene symbol:ligatin FBgn0041588 )	CG31426-RA	---	---	April 2004 (BDGP v4.0)	chr3R:24975608-24977512 (-) // 100.0 //	Ligatin	ligatin	---	full length	FBgn0041588	64874	Q9GU72 /// Q9NG60	---	---	NP_477481	NM_058133	FBgn0041588	---	---	---	---	---	0006413 // translational initiation // inferred from sequence or structural similarity /// 0006413 // translational initiation // inferred from electronic annotation	0005634 // nucleus // inferred from electronic annotation	0003723 // RNA binding // inferred from electronic annotation /// 0003743 // translation initiation factor activity // inferred from sequence or structural similarity /// 0003743 // translation initiation factor activity // inferred from electronic annotation	---	IPR002478 // PUA // 0.0023	---	---	This probe set was annotated using the Matching Probes based pipeline to a Entrez Gene identifier using 3 transcripts. // false // Matching Probes // A	AF260235(12),AY051703(12),NM_058133(14)
1637538_s_at	pearson	-0.320251	0.125145	-1.99996	0.702301	0.0533121	0.0609764	1.25464	0.487732	0.987792	0.987792	1637538_s_at	1637538_s_at	FBgn0034618	2008-11-29	Flybase	CG9485-RA	CG9485-RA /FEA=BDGP /GEN=CG9485 /DB_XREF=CG9485 FBgn0034618 /SEG=chr2R:+16356230,16363120 /MAP=57D11-57D11 /LEN=4900 /DEF=(CG9485 gene symbol:CG9485 FBgn0034618 (GO:0004134 4-alpha-glucanotransferase) (GO:0004135 amylo-1,6-glucosidase))	CG9485-RA	---	---	April 2004 (BDGP v4.0)	chr2R:17200184-17207074 (+) // 100.0 //	CG9485	CG9485	---	full length	FBgn0034618	37435	A8WHE8 /// Q1WWH5 /// Q7KVP4 /// Q86BS7 /// Q960T9 /// Q9W2H8	EC:2.4.1.25 /// EC:3.2.1.33	---	NP_611577 /// NP_726061 /// NP_726062	NM_137733 /// NM_166443 /// NM_166444	FBgn0034618	---	---	---	---	---	0005975 // carbohydrate metabolic process // inferred from electronic annotation /// 0005978 // glycogen biosynthetic process // inferred from electronic annotation /// 0008152 // metabolic process // inferred from electronic annotation	---	0003824 // catalytic activity // inferred from electronic annotation /// 0004134 // 4-alpha-glucanotransferase activity // inferred from sequence or structural similarity /// 0004134 // 4-alpha-glucanotransferase activity // inferred from electronic annotation /// 0004135 // amylo-alpha-1,6-glucosidase activity // inferred from sequence or structural similarity /// 0004135 // amylo-alpha-1,6-gluc…	---	---	---	---	This probe set was annotated using the Matching Probes based pipeline to a Entrez Gene identifier using 3 transcripts. // false // Matching Probes // A	NM_137733(14),NM_166443(14),NM_166444(14)
1629388_s_at	pearson	-0.320249	-0.405333	-1.99995	-2.46869	0.0533134	0.061061	1.25175	0.0192773	0.659741	0.659741	1629388_s_at	1629388_s_at	FBgn0039745	2008-11-29	Flybase	CG7950-RA	CG7950-RA /FEA=BDGP /GEN=CG7950 /DB_XREF=CG7950 FBgn0039745 /SEG=chr3R:+25871940,25873269 /MAP=99D3-99D3 /LEN=1224 /DEF=(CG7950 gene symbol:CG7950 FBgn0039745 )	CG7950-RA	---	---	April 2004 (BDGP v4.0)	chr3R:25882574-25883903 (+) // 100.0 //	CG7950	CG7950	---	full length	FBgn0039745 /// FBgn0085346	43579	A8JRG8 /// Q86P94 /// Q9VAA6	---	---	NP_001097977 /// NP_651770 /// NP_733343	NM_001104507 /// NM_143513 /// NM_170464	FBgn0039745	---	---	---	---	---	0008033 // tRNA processing // inferred from electronic annotation	---	0004540 // ribonuclease activity // inferred from electronic annotation	---	---	---	---	This probe set was annotated using the Matching Probes based pipeline to a Entrez Gene identifier using 3 transcripts. // true // Matching Probes // A	FBtr0085563(14),FBtr0085564(14),NM_001104507(14),NM_170464(14),NM_143513(14),GENSCAN00000017143(11),FBtr0085564(14),FBtr0085563(14),FBtr0112516(14)
1641179_at	pearson	0.320068	-0.00444573	1.99869	-0.024753	0.0534557	0.06121	1.25218	0.980411	0.999518	0.999518	1641179_at	1641179_at	FBgn0032590	39781	Flybase	CG4631-RA	CG4631-RA /FEA=BDGP /GEN=CG4631 /DB_XREF=CG4631 FBgn0032590 /SEG=chr2L:+16585506,16587964 /MAP=36A7-36A7 /LEN=2458 /DEF=(CG4631 gene symbol:CG4631 FBgn0032590 )	CG4631-RA	---	---	April 2004 (BDGP v4.0)	chr2L:16607422-16609880 (+) // 100.0 //	CG4631	CG4631	---	full length	FBgn0032590	34988	Q9VJK1	---	---	NP_609799	NM_135955	FBgn0032590	---	---	---	---	---	---	---	---	---	---	---	---	This probe set was annotated using the Matching Probes based pipeline to a Entrez Gene identifier using 1 transcripts. // false // Matching Probes // A	NM_135955(14)
1625975_at	pearson	-0.319362	0.271517	-1.99378	1.57075	0.0540144	0.0612316	1.26234	0.126393	0.907585	0.907585	1625975_at	1625975_at	FBgn0051052	2008-11-29	Flybase	CG31052-RA	CG31052-RA /FEA=BDGP /GEN=CG31052 /DB_XREF=CG31052 FBgn0051052 /SEG=chr3R:-18797834,18809939 /MAP=94D6-94D7 /LEN=2164 /DEF=(CG31052 gene symbol:CG31052 synonyms:(CG4693 CG4682) FBgn0051052 )	CG31052-RA	---	---	April 2004 (BDGP v4.0)	chr3R:18807178-18819283 (-) // 100.0 //	Na[+]/H[+] hydrogen antiporter 2	Nha2	---	full length	FBgn0051052	42710	Q9VCS7	---	---	NP_732807	NM_170043	FBgn0051052	---	---	---	---	---	0006810 // transport // inferred from electronic annotation /// 0006885 // regulation of pH // inferred from electronic annotation	0005794 // Golgi apparatus // inferred from direct assay /// 0016021 // integral to membrane // inferred from electronic annotation	0005515 // protein binding // inferred from physical interaction /// 0015299 // solute:hydrogen antiporter activity // inferred from electronic annotation	---	---	FBtr0084367 // span:112-134,144-166,173-192,197-216,223-245,255-277,303-322,326-345,358-375,379-401,452-474,524-546 // numtm:12 /// NP_732807.1 // span:112-134,144-166,173-192,197-216,223-245,255-277,303-322,326-345,358-375,379-401,452-474,524-546 // numtm:12 /// AAL13541.1 // span:112-134,144-166,173-192,197-216,223-245,255-277,303-322,326-345,358-375,379-401,452-474,524-546 // numtm:12 /// GENS…	---	This probe set was annotated using the Matching Probes based pipeline to a Entrez Gene identifier using 2 transcripts. // false // Matching Probes // A	AY058312(14),NM_170043(14)
1626344_at	pearson	-0.319009	-0.263873	-1.99133	-1.52317	0.0542951	0.0613982	1.26597	0.137854	0.91745	0.91745	1626344_at	1626344_at	FBgn0035470	2008-11-29	Flybase	CG14980-RB	CG14980-RB /FEA=BDGP /GEN=CG14980 /DB_XREF=CG14980 FBgn0035470 /SEG=chr3L:-3878066,3879785 /MAP=63F5-63F5 /LEN=1537 /DEF=(CG14980 gene symbol:CG14980 FBgn0035470 )	CG14980-RB	---	---	April 2004 (BDGP v4.0)	chr3L:3897437-3899156 (-) // 100.0 //	CG14980	CG14980	---	full length	FBgn0035470	38455	Q9VZL5	---	---	NP_647835	NM_139578	FBgn0035470	---	---	---	---	---	---	---	---	---	---	---	---	This probe set was annotated using the Matching Probes based pipeline to a Entrez Gene identifier using 2 transcripts. // false // Matching Probes // A	AY071668(14),NM_139578(14)
1628197_at	pearson	-0.318126	-0.0432414	-1.98519	-0.240983	0.0550032	0.061442	1.27658	0.811155	1.00213	1.00213	1628197_at	1628197_at	FBgn0040759	2008-11-29	Flybase	CT32418	CT32418 /FEA=sim4 /SEG=chr2R:+7228689,7228900	CT32418	---	---	April 2004 (BDGP v4.0)	chr2R:8051481-8051692 (+) // 100.0 //	CG13177	CG13177	---	full length	FBgn0040759	5740215	A8DYB2	---	---	NP_001097281	NM_001103811	FBgn0040759	---	---	---	---	---	---	---	---	---	IPR010800 // Glycine rich // 7.1E-5	---	---	This probe set was annotated using the Matching Probes based pipeline to a Entrez Gene identifier using 1 transcripts. // false // Matching Probes // A	NM_001103811(13)
1629086_s_at	pearson	-0.318665	0.0883366	-1.98893	0.493768	0.0545705	0.0614618	1.26945	0.624951	0.993466	0.993466	1629086_s_at	1629086_s_at	FBgn0017539	2008-11-29	Flybase	CG17246-RB	CG17246-RB /FEA=BDGP /SEG=chr2R:-14455575,14459668	CG17246-RB	---	---	April 2004 (BDGP v4.0)	chr2R:15279360-15283453 (-) // 100.0 //	succinate dehydrogenase flavoprotein subunit	Scs-fp	chr2-	full length	FBgn0017539	37228	Q94523	EC:1.3.5.1 /// EC:6.2.1.4	---	NP_477210 /// NP_725881 /// NP_725882	NM_057862 /// NM_166343 /// NM_166344	FBgn0017539	---	---	---	---	---	0006099 // tricarboxylic acid cycle // inferred from sequence or structural similarity /// 0006099 // tricarboxylic acid cycle // non-traceable author statement /// 0006099 // tricarboxylic acid cycle // inferred from electronic annotation /// 0006810 // transport // inferred from electronic annotation /// 0055114 // oxidation reduction // inferred from electronic annotation	0005739 // mitochondrion // inferred from electronic annotation /// 0005743 // mitochondrial inner membrane // inferred from electronic annotation /// 0005749 // mitochondrial respiratory chain complex II // inferred from sequence or structural similarity /// 0005749 // mitochondrial respiratory chain complex II // non-traceable author statement /// 0016020 // membrane // inferred from electronic…	0004776 // succinate-CoA ligase (GDP-forming) activity // non-traceable author statement /// 0008177 // succinate dehydrogenase (ubiquinone) activity // inferred from sequence or structural similarity /// 0008177 // succinate dehydrogenase (ubiquinone) activity // non-traceable author statement /// 0008177 // succinate dehydrogenase (ubiquinone) activity // inferred from electronic annotation ///…	---	---	---	---	This probe set was annotated using the Matching Probes based pipeline to a Entrez Gene identifier using 4 transcripts. // false // Matching Probes // A	AY051472(14),NM_057862(14),NM_166343(14),NM_166344(14)
1634269_at	pearson	0.317932	0.314005	1.98385	1.84144	0.0551597	0.0615555	1.27728	0.0751433	0.848599	0.848599	1634269_at	1634269_at	FBgn0031897	2008-11-29	Flybase	CG13784-RA	CG13784-RA /FEA=BDGP /GEN=CG13784 /DB_XREF=CG13784 FBgn0031897 /SEG=chr2L:-7197480,7212260 /MAP=27E4-27E5 /LEN=3504 /DEF=(CG13784 gene symbol:CG13784 FBgn0031897 )	CG13784-RA	---	---	April 2004 (BDGP v4.0)	chr2L:7205249-7220029 (-) // 100.0 //	CG13784	CG13784	---	full length	FBgn0031897	34003	Q0E8S5 /// Q6NNC9 /// Q8T9A4 /// Q95SN2	---	---	NP_001036343 /// NP_723261	NM_001042878 /// NM_164742	FBgn0031897	---	---	---	---	---	---	---	---	---	---	FBtr0110799 // span:13-35,48-67,77-96,168-190,220-242 // numtm:5 /// NP_001036343.1 // span:13-35,48-67,77-96,168-190,220-242 // numtm:5 /// FBpp0110096 // span:13-35,48-67,77-96,168-190,220-242,249-270 // numtm:6	---	This probe set was annotated using the Matching Probes based pipeline to a Entrez Gene identifier using 1 transcripts. // false // Matching Probes // A	NM_001042878(14)
1632531_at	pearson	0.317789	0.373293	1.98286	2.24036	0.0552751	0.0617252	1.27702	0.0323749	0.702918	0.702918	1632531_at	1632531_at	FBgn0034291	2008-11-29	Flybase	CG5770-RA	CG5770-RA /FEA=BDGP /GEN=CG5770 /DB_XREF=CG5770 FBgn0034291 /SEG=chr2R:-13107779,13108794 /MAP=55B1-55B1 /LEN=897 /DEF=(CG5770 gene symbol:CG5770 FBgn0034291 )	CG5770-RA	---	---	April 2004 (BDGP v4.0)	chr2R:13931550-13932565 (-) // 100.0 //	CG5770	CG5770	---	full length	FBgn0034291	37054	Q7JYK5	---	---	NP_611282	NM_137438	FBgn0034291	---	---	---	---	---	---	---	---	---	---	---	---	This probe set was annotated using the Matching Probes based pipeline to a Entrez Gene identifier using 2 transcripts. // false // Matching Probes // A	AY075434(14),NM_137438(14)
1641725_at	pearson	-0.31742	-0.084912	-1.98029	-0.474484	0.0555745	0.0619293	1.27809	0.63848	0.996614	0.996614	1641725_at	1641725_at	FBgn0038867	2008-11-29	Flybase	CG7000-RA	CG7000-RA /FEA=BDGP /GEN=CG7000 /DB_XREF=CG7000 FBgn0038867 /SEG=chr3R:-16991452,16993867 /MAP=93C2-93C2 /LEN=1656 /DEF=(CG7000 gene symbol:CG7000 FBgn0038867 (GO:0006952 defense response) (GO:0005044 scavenger receptor) (GO:0005887 integral to plasma membrane))	CG7000-RA	---	---	April 2004 (BDGP v4.0)	chr3R:16991435-16993850 (-) // 100.0 //	CG7000 /// Sensory neuron membrane protein	CG7000 /// Snmp	---	full length	FBgn0038867	42514	A5JS49 /// A5JS50 /// Q9VDD3	---	---	NP_650953	NM_142696	FBgn0038867 /// FBgn0259485	---	---	---	---	---	0006952 // defense response // non-traceable author statement /// 0007155 // cell adhesion // inferred from electronic annotation	0005887 // integral to plasma membrane // non-traceable author statement /// 0016020 // membrane // inferred from electronic annotation	0005044 // scavenger receptor activity // inferred from sequence or structural similarity /// 0005044 // scavenger receptor activity // non-traceable author statement /// 0005515 // protein binding // inferred from physical interaction	---	---	FBtr0084027 // span:5-27,459-481 // numtm:2 /// NP_650953.1 // span:5-27,459-481 // numtm:2 /// ABC86348.1 // span:5-27,459-481 // numtm:2 /// GENSCAN00000008784 // span:445-467 // numtm:1 /// FBpp0083430 // span:5-27,459-481 // numtm:2	---	This probe set was annotated using the Matching Probes based pipeline to a Entrez Gene identifier using 2 transcripts. // false // Matching Probes // A	BT024286(14),NM_142696(14)
1634402_at	pearson	-0.317705	-0.2192	-1.98227	-1.25087	0.0553435	0.0619386	1.27568	0.22034	0.963844	0.963844	1634402_at	1634402_at	FBgn0038042	2008-11-29	Flybase	CG5657-RA	CG5657-RA /FEA=BDGP /GEN=Scgbeta /DB_XREF=CG5657 FBgn0038042 /SEG=chr3R:-8246974,8248170 /MAP=87B9-87B9 /LEN=1196 /DEF=(CG5657 gene symbol:Scgbeta FBgn0038042 (GO:0016012 sarcoglycan complex) (GO:0008307 structural constituent of muscle))	CG5657-RA	---	---	April 2004 (BDGP v4.0)	chr3R:8246955-8248151 (-) // 100.0 //	Sarcoglycan beta	Scgbeta	---	full length	FBgn0038042	41525	Q9GT65 /// Q9VG77	---	---	NP_524327	NM_079603	FBgn0038042	---	---	---	---	---	0007010 // cytoskeleton organization and biogenesis // inferred from electronic annotation	0016012 // sarcoglycan complex // inferred from sequence or structural similarity /// 0016012 // sarcoglycan complex // non-traceable author statement /// 0016012 // sarcoglycan complex // inferred from electronic annotation /// 0016021 // integral to membrane // inferred from electronic annotation	0008307 // structural constituent of muscle // inferred from sequence or structural similarity	---	---	FBtr0082596 // span:82-104 // numtm:1 /// NP_524327.1 // span:82-104 // numtm:1 /// AAL48990.1 // span:82-104 // numtm:1 /// GENSCAN00000008505 // span:81-103 // numtm:1 /// FBpp0082068 // span:82-104 // numtm:1	---	This probe set was annotated using the Matching Probes based pipeline to a Entrez Gene identifier using 2 transcripts. // false // Matching Probes // A	AY071368(14),NM_079603(14)
1628719_at	pearson	-0.317258	0.00269512	-1.97917	0.0150059	0.0557062	0.0620624	1.2782	0.988124	0.998508	0.998508	1628719_at	1628719_at	FBgn0025680	2008-11-29	Flybase	CG3772-RA	CG3772-RA /FEA=BDGP /GEN=cry /DB_XREF=CG3772 FBgn0025680 /SEG=chr3R:+15037931,15041183 /MAP=91F11-91F11 /LEN=1859 /DEF=(CG3772 gene symbol:cry FBgn0025680 (GO:0005653 perinuclear space) (GO:0007186 G-protein coupled receptor protein signaling pathway) (GO:0007623 circadian rhythm) (GO:0005737 cytoplasm) (GO:0008020 G-protein coupled photoreceptor) (GO:0009588 UV-A, blue light phototransduction) (…	CG3772-RA	---	---	April 2004 (BDGP v4.0)	chr3R:15037914-15041166 (+) // 100.0 //	crybaby	cry	chr3-	full length	FBgn0025680	42305	O77059	---	---	NP_732407	NM_169852	FBgn0025680	---	---	---	---	---	0006281 // DNA repair // inferred from electronic annotation /// 0007602 // phototransduction // inferred from mutant phenotype /// 0007623 // circadian rhythm // inferred from expression pattern /// 0007623 // circadian rhythm // inferred from genetic interaction /// 0007623 // circadian rhythm // inferred from mutant phenotype /// 0007623 // circadian rhythm // inferred from physical interactio…	0005634 // nucleus // inferred from direct assay /// 0005641 // nuclear envelope lumen // inferred from direct assay /// 0005737 // cytoplasm // inferred from direct assay	0003913 // DNA photolyase activity // inferred from electronic annotation /// 0003913 // DNA photolyase activity // inferred from sequence or structural similarity /// 0004872 // receptor activity // inferred from electronic annotation /// 0005515 // protein binding // traceable author statement /// 0005515 // protein binding // inferred from physical interaction /// 0008020 // G-protein coupled …	---	---	---	---	This probe set was annotated using the Matching Probes based pipeline to a Entrez Gene identifier using 4 transcripts. // false // Matching Probes // A	AB018400(14),AF099734(14),AY051514(14),NM_169852(14)
1629256_a_at	pearson	0.317251	0.444037	1.97912	2.75923	0.0557121	0.0623649	1.27544	0.00963571	0.540456	0.540456	1629256_a_at	1629256_a_at	FBgn0051547	39781	Flybase	CG31547-RB	CG31547-RB /FEA=BDGP /GEN=CG31547 /DB_XREF=CG31547 FBgn0051547 /SEG=chr3R:-1315223,1328421 /MAP=83A5-83A6 /LEN=3891 /DEF=(CG31547 gene symbol:CG31547 synonyms:(CG2509 CG10544) FBgn0051547 (GO:0008511 sodium:chloridepotassium:chloride symporter))	CG31547-RB	---	---	April 2004 (BDGP v4.0)	chr3R:1315226-1328424 (-) // 100.0 //	CG31547	CG31547	---	full length	FBgn0051547	40663	Q8SWS0 /// Q9VNC6 /// Q9VNC7	---	---	NP_730938 /// NP_730939	NM_169057 /// NM_169058	FBgn0051547	---	---	---	---	---	0006810 // transport // inferred from sequence or structural similarity /// 0006810 // transport // inferred from electronic annotation /// 0006811 // ion transport // inferred from electronic annotation /// 0006814 // sodium ion transport // inferred from electronic annotation /// 0006821 // chloride transport // inferred from electronic annotation /// 0006865 // amino acid transport // inferred…	0016020 // membrane // inferred from electronic annotation /// 0016021 // integral to membrane // inferred from electronic annotation	0005215 // transporter activity // inferred from electronic annotation /// 0005515 // protein binding // inferred from physical interaction /// 0008511 // sodium:potassium:chloride symporter activity // inferred from sequence or structural similarity /// 0015171 // amino acid transmembrane transporter activity // inferred from sequence or structural similarity /// 0015377 // cation:chloride sympo…	---	---	FBtr0078764 // span:140-162,172-194,215-237,257-279,286-308,346-368,381-403,448-470,506-528,532-554,567-598 // numtm:11 /// FBtr0078765 // span:67-89,99-121,142-164,184-206,213-235,273-295,308-330,375-397,433-455,459-481,494-525 // numtm:11 /// NP_730938.1 // span:140-162,172-194,215-237,257-279,286-308,346-368,381-403,448-470,506-528,532-554,567-598 // numtm:11 /// NP_730939.1 // span:67-89,99-1…	---	This probe set was annotated using the Matching Probes based pipeline to a Entrez Gene identifier using 3 transcripts. // false // Matching Probes // A	AY122102(14),NM_169057(14),NM_169058(14)
1635025_a_at	pearson	-0.317	0.137154	-1.97738	0.770927	0.0559169	0.0624212	1.27723	0.446586	0.98487	0.98487	1635025_a_at	1635025_a_at	FBgn0028336	2008-11-29	Flybase	CG4094-RA	CG4094-RA /FEA=BDGP /GEN=CG4094 /DB_XREF=CG4094 FBgn0029889 /SEG=chrX:+6418841,6422230 /MAP=6C5-6C5 /LEN=1707 /DEF=(CG4094 gene symbol:CG4094 FBgn0029889 (GO:0005739 mitochondrion) (GO:0004333 fumarate hydratase))	CG4094-RA	---	---	April 2004 (BDGP v4.0)	chrX:6572498-6575887 (+) // 100.0 //	lethal (1) G0255	l(1)G0255	---	full length	FBgn0028336	31605	Q8IRQ5 /// Q8SXM1 /// Q9W3X6	EC:4.2.1.2	---	NP_572339 /// NP_727108	NM_132111 /// NM_167081	FBgn0028336	---	---	---	---	---	0006099 // tricarboxylic acid cycle // inferred from sequence or structural similarity /// 0006106 // fumarate metabolic process // inferred from electronic annotation	0005737 // cytoplasm // inferred from sequence or structural similarity /// 0005739 // mitochondrion // inferred from sequence or structural similarity /// 0045239 // tricarboxylic acid cycle enzyme complex // inferred from electronic annotation	0003824 // catalytic activity // inferred from electronic annotation /// 0004333 // fumarate hydratase activity // inferred from sequence or structural similarity /// 0004333 // fumarate hydratase activity // inferred from electronic annotation /// 0005515 // protein binding // inferred from physical interaction /// 0016829 // lyase activity // inferred from electronic annotation	---	---	---	---	This probe set was annotated using the Matching Probes based pipeline to a Entrez Gene identifier using 2 transcripts. // false // Matching Probes // A	NM_132111(14),NM_167081(14)
1626774_s_at	pearson	-0.316893	-0.16845	-1.97664	-0.951486	0.0560043	0.0626018	1.27634	0.348718	0.963771	0.963771	1626774_s_at	1626774_s_at	FBgn0005631	2008-11-29	Flybase	CG13521-RA	CG13521-RA /FEA=BDGP /GEN=robo /DB_XREF=CG13521 FBgn0005631 /SEG=chr2R:-17736073,17744512 /MAP=59A2-59A3 /LEN=6384 /DEF=(CG13521 gene symbol:robo FBgn0005631 (GO:0016199 axon midline choice point recognition) (GO:0005886 plasma membrane) (GO:0005887 integral to plasma membrane) (GO:0007411 axon guidance))	CG13521-RA	---	---	April 2004 (BDGP v4.0)	chr2R:18580028-18588467 (-) // 100.0 //	Roundabout 1	robo	chr2-	full length	FBgn0005631	37603	O44924 /// Q7KVK3 /// Q9W213	---	---	NP_476899 /// NP_726224	NM_057551 /// NM_166543	FBgn0005631	---	---	---	---	---	0007411 // axon guidance // inferred from mutant phenotype /// 0007411 // axon guidance // traceable author statement /// 0007427 // epithelial cell migration, open tracheal system // traceable author statement /// 0007432 // salivary gland boundary specification // inferred from mutant phenotype /// 0008038 // neuron recognition // inferred from mutant phenotype /// 0016199 // axon midline choic…	0005768 // endosome // non-traceable author statement /// 0005886 // plasma membrane // inferred from direct assay /// 0005887 // integral to plasma membrane // inferred from sequence or structural similarity	0004872 // receptor activity // traceable author statement /// 0005515 // protein binding // inferred from physical interaction	---	---	FBtr0071922 // span:917-939 // numtm:1 /// FBtr0071923 // span:951-973 // numtm:1 /// NP_476899.1 // span:917-939 // numtm:1 /// NP_726224.2 // span:951-973 // numtm:1 /// AAC38849.1 // span:917-939 // numtm:1 /// FBpp0071834 // span:951-973 // numtm:1 /// FBpp0071833 // span:917-939 // numtm:1	---	This probe set was annotated using the Matching Probes based pipeline to a Entrez Gene identifier using 2 transcripts. // false // Matching Probes // A	NM_057551(14),NM_166543(14)
1629491_at	pearson	-0.316837	-0.127303	-1.97625	-0.714609	0.0560497	0.0628265	1.2745	0.480198	0.985982	0.985982	1629491_at	1629491_at	FBgn0037627	2008-11-29	Flybase	CG13318-RA	CG13318-RA /FEA=BDGP /GEN=CG13318 /DB_XREF=CG13318 FBgn0037627 /SEG=chr3R:-4596983,4598423 /MAP=85B1-85B1 /LEN=1265 /DEF=(CG13318 gene symbol:CG13318 FBgn0037627 (GO:0004252 serine-type endopeptidase))	CG13318-RA	---	---	April 2004 (BDGP v4.0)	chr3R:4596968-4598408 (-) // 100.0 //	CG13318	CG13318	---	full length	FBgn0037627	41048	Q8SZ60	---	---	NP_649831	NM_141574	FBgn0037627	---	---	---	---	---	0006508 // proteolysis // inferred from electronic annotation	---	0003824 // catalytic activity // inferred from electronic annotation /// 0004252 // serine-type endopeptidase activity // inferred from electronic annotation /// 0004252 // serine-type endopeptidase activity // non-traceable author statement	---	---	---	---	This probe set was annotated using the Matching Probes based pipeline to a Entrez Gene identifier using 2 transcripts. // false // Matching Probes // A	AY071101(14),NM_141574(14)
1625272_at	pearson	-0.316715	-0.11155	-1.9754	-0.624987	0.0561501	0.062981	1.27391	0.536553	0.98689	0.98689	1625272_at	1625272_at	FBgn0051030	2008-11-29	Flybase	CG31030-RA	CG31030-RA /FEA=BDGP /GEN=CG31030 /DB_XREF=CG31030 FBgn0051030 /SEG=chr3R:-25979776,25981518 /MAP=99E1-99E1 /LEN=1685 /DEF=(CG31030 gene symbol:CG31030 synonyms:(CG2176) FBgn0051030 )	CG31030-RA	---	---	April 2004 (BDGP v4.0)	chr3R:25990410-25992152 (-) // 100.0 //	CG31030	CG31030	---	full length	FBgn0051030	318563	Q0KHY8 /// Q8IGI8 /// Q8IMJ0	EC:3.6.3.14	---	NP_001036775 /// NP_733350	NM_001043310 /// NM_170471	FBgn0051030	---	---	---	---	---	0015986 // ATP synthesis coupled proton transport // inferred from electronic annotation	0016021 // integral to membrane // inferred from electronic annotation /// 0016469 // proton-transporting two-sector ATPase complex // inferred from electronic annotation	0016787 // hydrolase activity // inferred from electronic annotation /// 0046933 // hydrogen ion transporting ATP synthase activity, rotational mechanism // inferred from electronic annotation /// 0046961 // hydrogen ion transporting ATPase activity, rotational mechanism // inferred from electronic annotation	---	---	FBtr0085579 // span:5-27,340-362 // numtm:2 /// FBtr0110834 // span:4-26,340-362,400-422 // numtm:3 /// NP_733350.1 // span:5-27,340-362 // numtm:2 /// NP_001036775.1 // span:4-26,340-362,400-422 // numtm:3 /// AAN71520.1 // span:21-43,358-380 // numtm:2 /// FBpp0110131 // span:4-26,340-362,400-422 // numtm:3 /// FBpp0084945 // span:5-27,340-362 // numtm:2	---	This probe set was annotated using the Matching Probes based pipeline to a Entrez Gene identifier using 2 transcripts. // false // Matching Probes // A	NM_001043310(11),NM_170471(14)
1639732_s_at	pearson	-0.316656	-0.0501649	-1.97499	-0.279658	0.0561983	0.0631121	1.27215	0.781597	1.00446	1.00446	1639732_s_at	1639732_s_at	FBgn0000287	2008-11-29	Flybase	CG4881-RA	CG4881-RA /FEA=BDGP /GEN=salr /DB_XREF=CG4881 FBgn0000287 /SEG=chr2L:+11354175,11362268 /MAP=32E4-32E5 /LEN=4126 /DEF=(CG4881 gene symbol:salr FBgn0000287 (GO:0003704 specific RNA polymerase II transcription factor) (GO:0005634 nucleus))	CG4881-RA	---	---	April 2004 (BDGP v4.0)	chr2L:11365304-11373397 (+) // 100.0 //	sal-related	salr	---	full length	FBgn0000287	34568	P91639 /// Q5U0U1 /// Q5U0U8 /// Q9VKH3	---	---	NP_523548 /// NP_723669	NM_078824 /// NM_164965	FBgn0000287	---	---	---	---	---	0008586 // imaginal disc-derived wing vein morphogenesis // traceable author statement /// 0045449 // regulation of transcription // inferred from sequence or structural similarity /// 0048098 // antennal joint development // inferred from mutant phenotype	0005622 // intracellular // inferred from electronic annotation /// 0005634 // nucleus // inferred from sequence or structural similarity	0003676 // nucleic acid binding // inferred from electronic annotation /// 0003704 // specific RNA polymerase II transcription factor activity // inferred from sequence or structural similarity /// 0008270 // zinc ion binding // inferred from electronic annotation	---	---	---	---	This probe set was annotated using the Matching Probes based pipeline to a Entrez Gene identifier using 2 transcripts. // false // Matching Probes // A	NM_078824(14),NM_164965(14)
1636490_at	pearson	0.316549	0.426271	1.97425	2.62369	0.0562863	0.0632602	1.27129	0.0133751	0.605539	0.605539	1636490_at	1636490_at	FBgn0043578	2008-11-29	Flybase	CG9681-RA	CG9681-RA /FEA=BDGP /SEG=chr3L:-16676222,16676863	CG9681-RA	---	---	April 2004 (BDGP v4.0)	chr3L:16720442-16721083 (-) // 100.0 //	PGRP-SB1	PGRP-SB1	---	full length	FBgn0043578	39870	Q70PY2	EC:3.5.1.28	---	NP_648917	NM_140660	FBgn0043578	---	---	---	---	---	0006952 // defense response // non-traceable author statement /// 0006955 // immune response // inferred from sequence or structural similarity /// 0006955 // immune response // inferred from electronic annotation /// 0009253 // peptidoglycan catabolic process // inferred from electronic annotation /// 0009253 // peptidoglycan catabolic process // non-traceable author statement /// 0045087 // inn…	0005576 // extracellular region // inferred from sequence or structural similarity /// 0005576 // extracellular region // inferred from direct assay /// 0005576 // extracellular region // inferred from electronic annotation /// 0005887 // integral to plasma membrane // non-traceable author statement	0005515 // protein binding // inferred from electronic annotation /// 0008270 // zinc ion binding // inferred from electronic annotation /// 0008745 // N-acetylmuramoyl-L-alanine amidase activity // inferred from electronic annotation /// 0016787 // hydrolase activity // inferred from electronic annotation /// 0042834 // peptidoglycan binding // inferred from sequence or structural similarity ///…	---	---	FBtr0075348 // span:5-27 // numtm:1 /// NP_648917.1 // span:5-27 // numtm:1 /// ABJ98404.1 // span:5-27 // numtm:1 /// ABK57080.1 // span:7-29 // numtm:1 /// GENSCAN00000005476 // span:5-27 // numtm:1 /// FBpp0075107 // span:5-27 // numtm:1	---	This probe set was annotated using the Matching Probes based pipeline to a Entrez Gene identifier using 1 transcripts. // false // Matching Probes // A	NM_140660(14)
1630996_s_at	pearson	0.316432	0.524075	1.97345	3.42612	0.0563816	0.0634309	1.2706	0.00174569	0.267038	0.267038	1630996_s_at	1630996_s_at	FBgn0035432	2008-11-29	Flybase	CG17723-RA	CG17723-RA /FEA=BDGP /GEN=CG17723 /DB_XREF=CG17723 FBgn0035432 /SEG=chr3L:+3284350,3294109 /MAP=63C6-63D1 /LEN=1959 /DEF=(CG17723 gene symbol:CG17723 FBgn0035432 (GO:0005385 zinc ion transporter))	CG17723-RA	---	---	April 2004 (BDGP v4.0)	chr3L:3303721-3313476 (+) // 99.8 //	CG17723	ZnT63C	---	full length	FBgn0035432	38407	Q7K3K5	---	---	NP_647801 /// NP_728856 /// NP_728857 /// NP_728858 /// NP_728859	NM_139544 /// NM_168015 /// NM_168016 /// NM_168017 /// NM_168018	FBgn0035432	---	---	---	---	---	0006812 // cation transport // inferred from electronic annotation	0016020 // membrane // inferred from electronic annotation	0005385 // zinc ion transmembrane transporter activity // inferred from sequence or structural similarity /// 0008324 // cation transmembrane transporter activity // inferred from electronic annotation	---	---	FBtr0073054 // span:12-34,70-92,113-135,200-222,235-252 // numtm:5 /// FBtr0073055 // span:12-34,70-92,113-135,200-222,235-252 // numtm:5 /// FBtr0073056 // span:12-34,70-92,113-135,200-222,235-252 // numtm:5 /// FBtr0073057 // span:12-34,70-92,113-135,200-222,235-252 // numtm:5 /// FBtr0073058 // span:12-34,70-92,113-135,200-222,235-252 // numtm:5 /// NP_728858.1 // span:12-34,70-92,113-135,200-…	---	This probe set was annotated using the Matching Probes based pipeline to a Entrez Gene identifier using 6 transcripts. // false // Matching Probes // A	AY058521(14),NM_139544(14),NM_168015(14),NM_168016(14),NM_168017(14),NM_168018(14)
1623019_a_at	pearson	-0.316387	0.0637612	-1.97313	0.355731	0.0564192	0.0636079	1.26862	0.724451	0.997553	0.997553	1623019_a_at	1623019_a_at	FBgn0053519	2008-11-29	Flybase	CG30171-RB	CG30171-RB /FEA=BDGP /GEN=CG30171 /DB_XREF=CG30171 FBgn0050171 /SEG=chr2R:-19039110,19051713 /MAP=60B1-60B1 /LEN=10020 /DEF=(CG30171 gene symbol:CG30171 synonyms:(CG18019 CG18020 CG18021 CG3901) FBgn0050171 (GO:0004674 protein serinethreonine kinase) (GO:0006468 protein amino acid phosphorylation))	CG30171-RB	---	---	April 2004 (BDGP v4.0)	chr2R:19883065-19895668 (-) // 100.0 //	PROJECTIN-like	Unc-89	---	full length	FBgn0053519	3346201	A2VEG9 /// A8DYP0 /// Q1ZYJ8 /// Q59E65 /// Q7K4Z6 /// Q8MT81	---	---	NP_001014545 /// NP_001097440	NM_001014545 /// NM_001103970	FBgn0053519	---	---	---	---	---	0006468 // protein amino acid phosphorylation // inferred from electronic annotation /// 0035023 // regulation of Rho protein signal transduction // inferred from electronic annotation	0005622 // intracellular // inferred from electronic annotation	0004672 // protein kinase activity // inferred from electronic annotation /// 0004674 // protein serine/threonine kinase activity // inferred from electronic annotation /// 0005089 // Rho guanyl-nucleotide exchange factor activity // inferred from electronic annotation /// 0005524 // ATP binding // inferred from electronic annotation	---	IPR001452 // Src homology-3 // 0.028 /// IPR011511 // Variant SH3 // 0.016	GENSCAN00000009215 // span:77-99,114-131,207-229,252-274,279-296,306-323,335-357 // numtm:7	---	This probe set was annotated using the Matching Probes based pipeline to a Entrez Gene identifier using 2 transcripts. // false // Matching Probes // A	NM_001014545(14),NM_001103970(14)
1639682_at	pearson	-0.316345	0.0109475	-1.97284	0.060957	0.0564534	0.0637889	1.26656	0.951785	0.997117	0.997117	1639682_at	1639682_at	---	2008-11-29	Flybase	GH13236	GH13236 /FEA=sim4 /SEG=chr3L:-11486432,11492006	GH13236	---	---	April 2004 (BDGP v4.0)	chr3L:11522000-11527574 (-) // 100.0 //	---	---	---	full length	---	---	Q8IQG1 /// Q95T81	---	---	NP_648474 /// NP_729714 /// NP_729715 /// NP_729716	NM_140217 /// NM_168460 /// NM_168461 /// NM_168462	---	---	---	---	---	---	0000902 // cell morphogenesis // inferred from mutant phenotype /// 0007611 // learning or memory // inferred from mutant phenotype /// 0008355 // olfactory learning // inferred from mutant phenotype	0005634 // nucleus // inferred from direct assay /// 0005634 // nucleus // inferred from electronic annotation /// 0005737 // cytoplasm // inferred from direct assay /// 0005737 // cytoplasm // inferred from electronic annotation	0005515 // protein binding // inferred from electronic annotation /// 0005515 // protein binding // inferred from physical interaction /// 0008270 // zinc ion binding // inferred from electronic annotation /// 0046872 // metal ion binding // inferred from electronic annotation	---	---	---	---	This probe set was annotated using the Matching Probes based pipeline to a UniGene identifier using 1 transcripts. // false // Matching Probes // A	AY060290(14)
1623357_at	pearson	0.316256	0.0980573	1.97222	0.548604	0.0565269	0.0639507	1.2654	0.587207	0.988239	0.988239	1623357_at	1623357_at	FBgn0035752	2008-11-29	Flybase	CG8616-RA	CG8616-RA /FEA=BDGP /GEN=CG8616 /DB_XREF=CG8616 FBgn0035752 /SEG=chr3L:+7198070,7199782 /MAP=65F1-65F1 /LEN=1565 /DEF=(CG8616 gene symbol:CG8616 FBgn0035752 )	CG8616-RA	---	---	April 2004 (BDGP v4.0)	chr3L:7231641-7233353 (+) // 100.0 //	CG8616	CG8616	---	full length	FBgn0035752	38793	Q9VS33	---	---	NP_648090	NM_139833	FBgn0035752	---	---	---	---	---	---	---	---	---	---	---	---	This probe set was annotated using the Matching Probes based pipeline to a Entrez Gene identifier using 1 transcripts. // false // Matching Probes // A	NM_139833(14)
1632721_at	pearson	-0.316139	-0.387267	-1.97141	-2.33871	0.0566233	0.06411	1.26475	0.0259745	0.695592	0.695592	1632721_at	1632721_at	FBgn0021874	2008-11-29	Flybase	CG2863-RA	CG2863-RA /FEA=BDGP /GEN=Nle /DB_XREF=CG2863 FBgn0021874 /SEG=chr2L:-568030,569827 /MAP=21D1-21D1 /LEN=1625 /DEF=(CG2863 gene symbol:Nle FBgn0021874 (GO:0007219 N receptor signaling pathway))	CG2863-RA	---	---	April 2004 (BDGP v4.0)	chr2L:566365-568162 (-) // 100.0 //	notchless	Nle	---	full length	FBgn0021874	33234	O96995 /// Q9VPR4	---	---	NP_477294	NM_057946	FBgn0021874	---	---	---	---	---	0007219 // Notch signaling pathway // inferred from sequence or structural similarity /// 0007219 // Notch signaling pathway // traceable author statement	---	0005112 // Notch binding // traceable author statement /// 0005515 // protein binding // inferred from physical interaction	---	---	---	---	This probe set was annotated using the Matching Probes based pipeline to a Entrez Gene identifier using 2 transcripts. // false // Matching Probes // A	AY089286(13),NM_057946(14)
1627278_s_at	pearson	-0.316123	0.0142174	-1.9713	0.0791673	0.0566362	0.0642182	1.26225	0.937408	0.996218	0.996218	1627278_s_at	1627278_s_at	FBgn0031187	2008-11-29	Flybase	CG14619-RE	CG14619-RE /FEA=BDGP /GEN=CG14619 /DB_XREF=CG14619 FBgn0031187 /SEG=chrX:+21388667,21401356 /MAP=20B1-20B1 /LEN=3210 /DEF=(CG14619 gene symbol:CG14619 FLAGGED_PROBLEMATIC FBgn0031187 (GO:0004843 ubiquitin-specific protease))	CG14619-RE	---	---	April 2004 (BDGP v4.0)	chrX:21857638-21870327 (+) // 100.0 //	CG14619	CG14619	---	full length	FBgn0031187	33132	Q8IQ26 /// Q8IQ27 /// Q9VR54	EC:3.1.2.15 /// EC:3.4.22.-	---	NP_608462 /// NP_728453 /// NP_728454 /// NP_728455 /// NP_728456	NM_134618 /// NM_167775 /// NM_167776 /// NM_167777 /// NM_167778	FBgn0031187	---	---	---	---	---	0006511 // ubiquitin-dependent protein catabolic process // inferred from electronic annotation /// 0016579 // protein deubiquitination // traceable author statement	---	0004221 // ubiquitin thiolesterase activity // inferred from electronic annotation /// 0004843 // ubiquitin-specific protease activity // traceable author statement /// 0008233 // peptidase activity // inferred from electronic annotation /// 0008234 // cysteine-type peptidase activity // inferred from electronic annotation /// 0016787 // hydrolase activity // inferred from electronic annotation	---	---	GENSCAN00000010444 // span:7-29,1181-1203 // numtm:2	---	This probe set was annotated using the Matching Probes based pipeline to a Entrez Gene identifier using 7 transcripts. // false // Matching Probes // A	AY069803(14),BT003648(14),NM_134618(14),NM_167775(14),NM_167776(14),NM_167777(14),NM_167778(14)
1636765_at	pearson	0.315968	0.111915	1.97022	0.627058	0.0567648	0.0643568	1.26233	0.535213	0.986581	0.986581	1636765_at	1636765_at	FBgn0002781	2008-11-29	Flybase	CG32491-RJ	CG32491-RJ /FEA=BDGP /GEN=mod(mdg4) /DB_XREF=CG32491 FBgn0002781 /MAP=93D7-93D9 /LEN=1673 /DEF=(CG32491 gene symbol:mod(mdg4) synonyms:(CG15500 CG15501 CG15802 CG18151 CG8076 CG7859 CG7836) FBgn0002781 (GO:0007292 oogenesis) (GO:0008354 germ-cell migration) (GO:0008195 phosphatidate phosphatase) (GO:0005886 plasma membrane) (GO:0003702 RNA polymerase II transcription factor) (GO:0005700 polytene …	CG32491-RJ	---	---	April 2004 (BDGP v4.0)	chr3R:17182776-17203121 (-) // 100.0 //	Modifier67.2	mod(mdg4)	chr3-70.7	full length	FBgn0002781	49228	A1A704 /// A2VEP1 /// A2VES1 /// Q70BZ0 /// Q70BZ1 /// Q70BZ2 /// Q70BZ3 /// Q70BZ4 /// Q70BZ5 /// Q86B87 /// Q8MRZ1 /// Q8MSJ7	EC:3.1.3.4	---	NP_001097856 /// NP_001097857 /// NP_001097858 /// NP_524936 /// NP_732619 /// NP_732620 /// NP_732621 /// NP_732622 /// NP_732623 /// NP_732624 /// NP_732625 /// NP_732626 /// NP_732627 /// NP_732628 /// NP_732629 /// NP_732630 /// NP_732631 /// NP_732632 /// NP_732633 /// NP_732634 /// NP_732635 /// NP_732636	NM_001104386 /// NM_001104387 /// NM_001104388 /// NM_080197 /// NM_163877 /// NM_163878 /// NM_163879 /// NM_163880 /// NM_163881 /// NM_163882 /// NM_163883 /// NM_163884 /// NM_163885 /// NM_163886 /// NM_163887 /// NM_163888 /// NM_163889 /// NM_163890 /// NM_163891 /// NM_163892 /// NM_163893 /// NM_163894	FBgn0002781	---	---	---	---	---	0001672 // regulation of chromatin assembly or disassembly // inferred from mutant phenotype /// 0006325 // establishment or maintenance of chromatin architecture // non-traceable author statement /// 0006350 // transcription // inferred from electronic annotation /// 0006355 // regulation of transcription, DNA-dependent // inferred from electronic annotation /// 0006412 // translation // inferre…	0000785 // chromatin // inferred from mutant phenotype /// 0000794 // condensed nuclear chromosome // inferred from direct assay /// 0005622 // intracellular // inferred from electronic annotation /// 0005634 // nucleus // inferred from direct assay /// 0005634 // nucleus // non-traceable author statement /// 0005634 // nucleus // inferred from electronic annotation /// 0005700 // polytene chromo…	0003682 // chromatin binding // inferred from mutant phenotype /// 0003702 // RNA polymerase II transcription factor activity // non-traceable author statement /// 0003735 // structural constituent of ribosome // inferred from electronic annotation /// 0005515 // protein binding // inferred from physical interaction /// 0005515 // protein binding // inferred from electronic annotation /// 0008195…	---	---	---	---	This probe set was annotated using the Matching Probes based pipeline to a Entrez Gene identifier using 1 transcripts. // false // Matching Probes // A	NM_163885(14)
1639567_at	pearson	0.315769	0.425713	1.96885	2.6195	0.0569294	0.0645072	1.26321	0.0135099	0.606203	0.606203	1639567_at	1639567_at	FBgn0030092	2008-11-29	Flybase	CG8971-RA	CG8971-RA /FEA=BDGP /GEN=fh /DB_XREF=CG8971 FBgn0030092 /SEG=chrX:-8887077,8888043 /MAP=8C16-8C17 /LEN=897 /DEF=(CG8971 gene symbol:fh FBgn0030092 (GO:0005739 mitochondrion) (GO:0006879 iron ion homeostasis))	CG8971-RA	---	---	April 2004 (BDGP v4.0)	chrX:9042126-9043092 (-) // 100.0 //	Frataxin	fh	---	full length	FBgn0030092	31845	Q9W385	---	---	NP_511094	NM_078539	FBgn0030092	---	---	---	---	---	0006879 // cellular iron ion homeostasis // inferred from sequence or structural similarity /// 0006879 // cellular iron ion homeostasis // non-traceable author statement /// 0006879 // cellular iron ion homeostasis // inferred from electronic annotation	0005739 // mitochondrion // inferred from sequence or structural similarity /// 0005739 // mitochondrion // non-traceable author statement /// 0005739 // mitochondrion // inferred from electronic annotation	---	---	---	---	---	This probe set was annotated using the Matching Probes based pipeline to a Entrez Gene identifier using 2 transcripts. // false // Matching Probes // A	AY094649(14),NM_078539(14)
1641256_at	pearson	-0.315502	-0.327235	-1.967	-1.92812	0.0571502	0.064663	1.26532	0.063043	0.824459	0.824459	1641256_at	1641256_at	FBgn0036691	2008-11-29	Flybase	CG7842-RA	CG7842-RA /FEA=BDGP /GEN=CG7842 /DB_XREF=CG7842 FBgn0036691 /SEG=chr3L:+16984563,16985740 /MAP=73E4-73E5 /LEN=1177 /DEF=(CG7842 gene symbol:CG7842 FBgn0036691 (GO:0005739 mitochondrion) (GO:0004314 (acyl-carrier protein) S-malonyltransferase))	CG7842-RA	---	---	April 2004 (BDGP v4.0)	chr3L:17028783-17029960 (+) // 100.0 //	CG7842	CG7842	---	full length	FBgn0036691	39910	Q8T3L6	EC:2.3.1.39	---	NP_648950	NM_140693	FBgn0036691	---	---	---	---	---	0006633 // fatty acid biosynthetic process // inferred from sequence or structural similarity /// 0006633 // fatty acid biosynthetic process // inferred from electronic annotation /// 0008152 // metabolic process // inferred from electronic annotation /// 0008152 // metabolic process // inferred from sequence or structural similarity /// 0008610 // lipid biosynthetic process // inferred from elec…	0005739 // mitochondrion // inferred from sequence or structural similarity /// 0005739 // mitochondrion // inferred from electronic annotation	0003824 // catalytic activity // inferred from electronic annotation /// 0004314 // [acyl-carrier-protein] S-malonyltransferase activity // inferred from sequence or structural similarity /// 0004314 // [acyl-carrier-protein] S-malonyltransferase activity // inferred from electronic annotation /// 0005488 // binding // inferred from electronic annotation /// 0016740 // transferase activity // inf…	---	IPR001227 // Acyl transferase region // 2.1E-6	---	---	This probe set was annotated using the Matching Probes based pipeline to a Entrez Gene identifier using 1 transcripts. // false // Matching Probes // A	NM_140693(14)
1632720_at	pearson	0.315311	0.558118	1.96568	3.74502	0.0573095	0.0647779	1.26608	0.000738019	0.17328	0.17328	1632720_at	1632720_at	FBgn0004431	2008-11-29	Flybase	CG9120-RA	CG9120-RA /FEA=BDGP /GEN=LysX /DB_XREF=CG9120 FBgn0004431 /SEG=chr3L:-1175366,1175931 /MAP=61F3-61F3 /LEN=565 /DEF=(CG9120 gene symbol:LysX FBgn0004431 (GO:0003793 defenseimmunity protein) (GO:0003796 lysozyme) (GO:0006960 antimicrobial humoral response (sensu Invertebrata)))	CG9120-RA	---	---	April 2004 (BDGP v4.0)	chr3L:1194737-1195302 (-) // 100.0 //	Lysozyme X	LysX	---	full length	FBgn0004431	38122	P37161	EC:3.2.1.17	---	NP_523881	NM_079157	FBgn0004431	---	---	---	---	---	0006952 // defense response // inferred from sequence or structural similarity /// 0008152 // metabolic process // inferred from electronic annotation /// 0016998 // cell wall catabolic process // inferred from electronic annotation /// 0019730 // antimicrobial humoral response // non-traceable author statement /// 0019835 // cytolysis // inferred from electronic annotation /// 0042742 // defense…	0005576 // extracellular region // inferred from electronic annotation	0003796 // lysozyme activity // inferred from sequence or structural similarity /// 0003796 // lysozyme activity // non-traceable author statement /// 0003796 // lysozyme activity // inferred from electronic annotation /// 0003824 // catalytic activity // inferred from electronic annotation /// 0016787 // hydrolase activity // inferred from electronic annotation /// 0016798 // hydrolase activity,…	---	---	---	---	This probe set was annotated using the Matching Probes based pipeline to a Entrez Gene identifier using 2 transcripts. // false // Matching Probes // A	AY119081(14),NM_079157(14)
1629121_at	pearson	0.315121	0.438953	1.96436	2.72004	0.0574678	0.0648843	1.2668	0.010602	0.563358	0.563358	1629121_at	1629121_at	FBgn0032805	2008-11-29	Flybase	CG10337-RA	CG10337-RA /FEA=BDGP /GEN=CG10337 /DB_XREF=CG10337 FBgn0032805 /SEG=chr2L:-19523356,19524997 /MAP=37F1-37F1 /LEN=1354 /DEF=(CG10337 gene symbol:CG10337 FBgn0032805 )	CG10337-RA	---	---	April 2004 (BDGP v4.0)	chr2L:19545273-19546914 (-) // 100.0 //	CG10337	CG10337	---	full length	FBgn0032805	35247	Q9VIU0	---	---	NP_609986	NM_136142	FBgn0032805	---	---	---	---	---	---	0016021 // integral to membrane // inferred from electronic annotation	---	---	---	FBtr0081276 // span:13-35,42-64,84-106,127-149,162-184 // numtm:5 /// NP_609986.1 // span:13-35,42-64,84-106,127-149,162-184 // numtm:5 /// ABE01218.1 // span:13-35,42-64,84-106,127-149,162-184 // numtm:5 /// FBpp0080814 // span:13-35,42-64,84-106,127-149,162-184 // numtm:5	---	This probe set was annotated using the Matching Probes based pipeline to a Entrez Gene identifier using 2 transcripts. // false // Matching Probes // A	BT024988(11),NM_136142(11)
1638984_s_at	pearson	-0.314699	-0.135711	-1.96144	-0.762664	0.0578205	0.0649484	1.2718	0.451429	0.983518	0.983518	1638984_s_at	1638984_s_at	FBgn0037525	2008-11-29	Flybase	CG17816-RA	CG17816-RA /FEA=BDGP /GEN=CG17816 /DB_XREF=CG17816 FBgn0037525 /SEG=chr3R:-3686671,3712469 /MAP=84E3-84E4 /LEN=5387 /DEF=(CG17816 gene symbol:CG17816 FBgn0037525 )	CG17816-RA	---	---	April 2004 (BDGP v4.0)	chr3R:3686683-3712454 (-) // 99.5 //	CG17816	CG17816	---	full length	---	40928	Q1RKY2 /// Q86PA0 /// Q95SM3	---	---	NP_001097705 /// NP_001097706 /// NP_996180	NM_001104235 /// NM_001104236 /// NM_206458	FBgn0037525	---	---	---	---	---	---	---	---	---	---	AAL28250.1 // span:48-70 // numtm:1	---	This probe set was annotated using the Matching Probes based pipeline to a UniGene identifier using 1 transcripts. // false // Matching Probes // A	AY060702(14)
1636747_at	pearson	-0.31469	-0.152002	-1.96138	-0.856263	0.0578287	0.0651678	1.26921	0.398423	0.977753	0.977753	1636747_at	1636747_at	FBgn0031012	2008-11-29	Flybase	CG8051-RA	CG8051-RA /FEA=BDGP /GEN=CG8051 /DB_XREF=CG8051 FBgn0031012 /SEG=chrX:-19032280,19038884 /MAP=18C1-18C1 /LEN=2567 /DEF=(CG8051 gene symbol:CG8051 FBgn0031012 (GO:0015355 monocarboxylate porter))	CG8051-RA	---	---	April 2004 (BDGP v4.0)	chrX:19195353-19201957 (-) // 100.0 //	CG8051	CG8051	---	full length	FBgn0031012	32925	Q9VWJ0	---	---	NP_573377	NM_133149	FBgn0031012	---	---	---	---	---	0006810 // transport // inferred from electronic annotation	0016021 // integral to membrane // inferred from electronic annotation	0005215 // transporter activity // inferred from electronic annotation /// 0015355 // secondary active monocarboxylate transmembrane transporter activity // inferred from sequence or structural similarity	---	---	FBtr0074683 // span:87-109,124-146,153-172,177-199,212-234,239-261,423-445,460-479,486-508,518-537,550-572,576-598 // numtm:12 /// NP_573377.1 // span:87-109,124-146,153-172,177-199,212-234,239-261,423-445,460-479,486-508,518-537,550-572,576-598 // numtm:12 /// AAL40006.1 // span:87-109,124-146,153-172,177-199,212-234,239-261,423-445,460-479,486-508,518-537,550-572,576-598 // numtm:12 /// GENSCAN…	---	This probe set was annotated using the Matching Probes based pipeline to a Entrez Gene identifier using 2 transcripts. // false // Matching Probes // A	AY069861(14),NM_133149(14)
1634106_at	pearson	-0.31463	0.0941336	-1.96097	0.526451	0.0578786	0.0653188	1.26755	0.602321	0.990558	0.990558	1634106_at	1634106_at	FBgn0040551	2008-11-29	Flybase	CG11686-RA	CG11686-RA /FEA=BDGP /GEN=CG11686 /DB_XREF=CG11686 FBgn0040551 /SEG=chr3R:+9086097,9087973 /MAP=87E3-87E3 /LEN=423 /DEF=(CG11686 gene symbol:CG11686 FBgn0040551 )	CG11686-RA	---	---	April 2004 (BDGP v4.0)	chr3R:9086078-9087954 (+) // 100.0 //	CG11686	CG11686	---	full length	FBgn0040551	50024	Q9VFX9	---	---	NP_652204	NM_143947	FBgn0040551	---	---	---	---	---	---	---	---	---	---	FBtr0082735 // span:10-32 // numtm:1 /// NP_652204.1 // span:10-32 // numtm:1 /// AAL48155.1 // span:10-32 // numtm:1 /// FBpp0082203 // span:10-32 // numtm:1	---	This probe set was annotated using the Matching Probes based pipeline to a Entrez Gene identifier using 2 transcripts. // false // Matching Probes // A	AY070684(14),NM_143947(14)
1634779_at	pearson	0.314544	0.215966	1.96037	1.23151	0.057951	0.0654884	1.26639	0.227393	0.958965	0.958965	1634779_at	1634779_at	FBgn0046706	2008-11-29	Flybase	CG40080-RA	CG40080-RA /FEA=BDGP /GEN=CG40080 /DB_XREF=CG40080 FBgn0058080 /SEG=chrU:+5819131,5853933 /LEN=1843 /DEF=(CG40080 gene symbol:CG40080 FLAGGED_PROBLEMATIC FBgn0058080 )	CG40080-RA	---	---	April 2004 (BDGP v4.0)	chr2RHet:3199347-3234607 (+) // 100.0 //	Haspin	Haspin	---	full length	FBgn0046706	3355064	P83103	EC:2.7.1.112	---	NP_001015349	NM_001015349	FBgn0046706	---	---	---	---	---	0006468 // protein amino acid phosphorylation // inferred from electronic annotation /// 0006468 // protein amino acid phosphorylation // non-traceable author statement /// 0006468 // protein amino acid phosphorylation // inferred from sequence or structural similarity /// 0007243 // protein kinase cascade // inferred from sequence or structural similarity	0005634 // nucleus // inferred from electronic annotation /// 0005634 // nucleus // inferred from sequence or structural similarity	0000166 // nucleotide binding // inferred from electronic annotation /// 0004672 // protein kinase activity // inferred from electronic annotation /// 0004674 // protein serine/threonine kinase activity // inferred from electronic annotation /// 0004674 // protein serine/threonine kinase activity // non-traceable author statement /// 0004713 // protein tyrosine kinase activity // inferred from el…	---	IPR001245 // Tyrosine protein kinase // 0.0066	---	---	This probe set was annotated using the Matching Probes based pipeline to a Entrez Gene identifier using 2 transcripts. // false // Matching Probes // A	AY118897(14),NM_001015349(14)
1632644_s_at	pearson	-0.313958	0.00247705	-1.95632	0.0137917	0.058445	0.0656571	1.27168	0.989085	0.99838	0.99838	1632644_s_at	1632644_s_at	FBgn0000363	2008-11-29	Flybase	CG31243-RA	CG31243-RA /FEA=BDGP /GEN=cpo /DB_XREF=CG31243 FBgn0000363 /SEG=chr3R:+13757609,13841531 /MAP=90D1-90D6 /LEN=6238 /DEF=(CG31243 gene symbol:cpo synonyms:(CG18434 CG18435 CG12349) FBgn0000363 (GO:0003723 RNA binding) (GO:0007422 peripheral nervous system development) (GO:0005634 nucleus))	CG31243-RA	---	---	April 2004 (BDGP v4.0)	chr3R:13757594-13841501 (+) // 99.76 //	couch potato	cpo	---	full length	FBgn0000363	45840	A4V319 /// Q01617 /// Q8MSK9	---	---	NP_001014631 /// NP_001014632 /// NP_524844 /// NP_732282 /// NP_732283 /// NP_732284	NM_001014631 /// NM_001014632 /// NM_080105 /// NM_169781 /// NM_169782 /// NM_169783	FBgn0000363	---	---	---	---	---	0007268 // synaptic transmission // inferred from mutant phenotype /// 0007422 // peripheral nervous system development // non-traceable author statement /// 0009987 // cellular process // inferred from mutant phenotype /// 0042048 // olfactory behavior // inferred from mutant phenotype	0005634 // nucleus // inferred from direct assay /// 0005634 // nucleus // non-traceable author statement /// 0005634 // nucleus // inferred from electronic annotation	0000166 // nucleotide binding // inferred from electronic annotation /// 0003676 // nucleic acid binding // inferred from electronic annotation /// 0003723 // RNA binding // inferred from electronic annotation /// 0003729 // mRNA binding // inferred from sequence or structural similarity /// 0005515 // protein binding // inferred from physical interaction	---	---	---	---	This probe set was annotated using the Matching Probes based pipeline to a Entrez Gene identifier using 4 transcripts. // false // Matching Probes // A	NM_080105(14),NM_169781(14),NM_169782(14),NM_169783(14)
1626841_s_at	pearson	0.314472	-0.00548731	1.95987	-0.0305525	0.0580112	0.0656593	1.26497	0.975822	0.998571	0.998571	1626841_s_at	1626841_s_at	FBgn0000317	2008-11-29	Flybase	CG7595-RA	CG7595-RA /FEA=BDGP /GEN=ck /DB_XREF=CG7595 FBgn0000317 /SEG=chr2L:-15023045,15035933 /MAP=35B8-35B9 /LEN=7229 /DEF=(CG7595 gene symbol:ck FBgn0000317 (GO:0003774 motor) (GO:0016461 unconventional myosin) (GO:0003779 actin binding) (GO:0005860 non-muscle myosin) (GO:0008570 myosin ATPase) (GO:0016459 myosin))	CG7595-RA	---	---	April 2004 (BDGP v4.0)	chr2L:15044960-15057848 (-) // 100.0 //	Crinkled	ck	chr2-51.0	full length	FBgn0000317	34882	Q9V3Z6	EC:3.6.1.3	---	NP_523571 /// NP_723895	NM_078847 /// NM_165099	FBgn0000317	---	---	---	---	---	0007605 // sensory perception of sound // inferred from mutant phenotype /// 0008407 // bristle morphogenesis // inferred from mutant phenotype /// 0030048 // actin filament-based movement // inferred from direct assay /// 0035317 // imaginal disc-derived wing hair organization and biogenesis // inferred from genetic interaction /// 0048800 // antennal morphogenesis // inferred from mutant phenot…	0005737 // cytoplasm // inferred from direct assay /// 0005737 // cytoplasm // inferred from electronic annotation /// 0005856 // cytoskeleton // inferred from electronic annotation /// 0016459 // myosin complex // inferred from sequence or structural similarity /// 0016459 // myosin complex // inferred from electronic annotation /// 0016461 // unconventional myosin complex // inferred from seque…	0000166 // nucleotide binding // inferred from electronic annotation /// 0003774 // motor activity // inferred from sequence or structural similarity /// 0003774 // motor activity // inferred from electronic annotation /// 0003779 // actin binding // inferred from sequence or structural similarity /// 0003779 // actin binding // inferred from electronic annotation /// 0005215 // transporter activ…	---	IPR001452 // Src homology-3 // 0.0059 /// IPR011511 // Variant SH3 // 0.023	---	---	This probe set was annotated using the Matching Probes based pipeline to a Entrez Gene identifier using 2 transcripts. // false // Matching Probes // A	NM_078847(14),NM_165099(14)
1636488_at	pearson	-0.313843	-0.238624	-1.95552	-1.36812	0.058542	0.0658101	1.27105	0.181109	0.937681	0.937681	1636488_at	1636488_at	FBgn0038749	2008-11-29	Flybase	CG4468-RA	CG4468-RA /FEA=BDGP /GEN=CG4468 /DB_XREF=CG4468 FBgn0038749 /SEG=chr3R:-15740127,15741148 /MAP=92B6-92B6 /LEN=953 /DEF=(CG4468 gene symbol:CG4468 FBgn0038749 )	CG4468-RA	---	---	April 2004 (BDGP v4.0)	chr3R:15740110-15741131 (-) // 100.0 //	CG4468 /// CG4468	CG4468 /// DlitCG4468	---	full length	FBgn0038749	42373	Q8I1D3 /// Q9VDS3	---	---	NP_650846	NM_142589	FBgn0038749 /// FBgn0064532	---	---	---	---	---	---	---	0005515 // protein binding // inferred from physical interaction	---	---	FBtr0083852 // span:78-96 // numtm:1 /// NP_650846.1 // span:78-96 // numtm:1 /// GENSCAN00000011509 // span:78-96,100-122 // numtm:2 /// FBpp0083261 // span:78-96 // numtm:1	---	This probe set was annotated using the Matching Probes based pipeline to a Entrez Gene identifier using 1 transcripts. // false // Matching Probes // A	NM_142589(14)
[truncated: 9,799 more rows]
[truncated: 4 more columns]
